# Supplementary material for: Proteomic and Phospho-Proteomic Profile of Human Platelets in Basal, Resting State: Insights into Integrin Signaling
Source: PubMed Central journal article supplement (PMC2762604; doi:10.1371/journal.pone.0007627), 2009-10-27
Supplement: pone.0007627.s006.pdf [file pone.0007627.s006.pdf]

| Refseq ID    | gi Number | Protein Name/Description                                                |
|--------------|-----------|-------------------------------------------------------------------------|
| 1 NP_000005  | 4557225   | alpha 2 macroglobulin precursor                                         |
| 2 NP_000009  | 4557235   | acyl-Coenzyme A dehydrogenase, very long chain precursor                |
| 3 NP_000022  | 4557297   | delta-aminolevulinic acid dehydratase; porphobilinogen synthase; aminol |
| 4 NP_000025  | 4557305   | aldolase A; fructose-bisphosphate aldolase; Aldolase A, fructose-bispho |
| 5 NP_000029  | 4557319   | adenomatosis polyposis coli                                             |
| 6 NP_000030  | 4557321   | apolipoprotein A-I precursor                                            |
| 7 NP_000031  | 4557323   | apolipoprotein C-III precursor                                          |
| 8 NP_000033  | 4557327   | beta-2-glycoprotein I precursor                                         |
| 9 NP_000052  | 4557377   | Bruton agammaglobulinemia tyrosine kinase                               |
| 10 NP_000055 | 4557385   | complement component 3 precursor; acylation-stimulating protein cleavag |
| 11 NP_000058 | 4557395   | carbonic anhydrase II; carbonate dehydratase II; carbonic dehydratase;  |
| 12 NP_000062 | 4557415   | cystathionine-beta-synthase; serine sulfhydrase; beta-thionase; methylc |
| 13 NP_000063 | 4557419   | CD36 antigen (collagen type I receptor, thrombospondin receptor); CD36  |
| 14 NP_000087 | 4557485   | ceruloplasmin (ferroxidase); Ceruloplasmin                              |
| 15 NP_000091 | 4503117   | cystatin B; stefin B; liver thiol proteinase inhibitor; CPI-B           |
| 16 NP_000099 | 4557525   | dihydrolipoamide dehydrogenase precursor; E3 component of pyruvate dehy |
| 17 NP_000108 | 4557553   | emerin                                                                  |
| 18 NP_000117 | 4503607   | electron transfer flavoprotein, alpha polypeptide; electron-transferrin |
| 19 NP_000120 | 4503631   | coagulation factor XIII A1 subunit precursor; Coagulation factor XIII,  |
| 20 NP_000121 | 4503643   | coagulation factor V precursor; labile factor; factor V Leiden          |
| 21 NP_000131 | 4557593   | ferrochelatase                                                          |
| 22 NP_000135 | 4503785   | frataxin; Friedreich ataxia (frataxin)                                  |
| 23 NP_000149 | 4557619   | glucan (1,4-alpha-), branching enzyme 1 (glycogen branching enzyme); GI |
| 24 NP_000164 | 4504071   | platelet glycoprotein Ib alpha polypeptide precursor                    |
| 25 NP_000165 | 4504077   | glycoprotein IX (platelet)                                              |
| 26 NP_000166 | 18201905  | glucose phosphate isomerase; neuroleukin; glucose-6-phosphate isomeras  |
| 27 NP_000168 | 4504165   | gelsolin (amyloidosis, Finnish type); Gelsolin                          |
| 28 NP_000173 | 20127408  | hydroxyacyl dehydrogenase, subunit A; trifunctional protein, alpha sub  |
| 29 NP_000175 | 6715607   | G-gamma globin                                                          |
| 30 NP_000177 | 4504375   | H factor 1 (complement); H factor-1 (complement)                        |
| 31 NP_000179 | 4504391   | hexokinase 1 isoform HKI; brain form hexokinase                         |
| 32 NP_000180 | 15553127  | hexokinase 2; hexokinase-2, muscle                                      |
| 33 NP_000185 | 4504483   | hypoxanthine phosphoribosyltransferase 1                                |
| 34 NP_000201 | 4557675   | integrin alpha chain, alpha 6                                           |
| 35 NP_000203 | 4557677   | integrin beta chain, beta 3 precursor; platelet glycoprotein IIIa precu |
| 36 NP_000217 | 4557705   | keratin 9                                                               |
| 37 NP_000230 | 4557894   | lysozyme precursor                                                      |
| 38 NP_000243 | 4557896   | myotubularin                                                            |
| 39 NP_000248 | 4557773   | myosin, heavy polypeptide 7, cardiac muscle, beta                       |
| 40 NP_000260 | 4557797   | non-metastatic cells 1 protein                                          |
| 41 NP_000261 | 4557801   | purine nucleoside phosphorylase                                         |
| 42 NP_000274 | 4505669   | phosphodiesterase 6B, cGMP-specific, rod, beta                          |
| 43 NP_000281 | 4505755   | phosphoglycerate mutase 2 (muscle); Phosphoglycerate mutase, muscle for |
| 44 NP_000282 | 4505763   | phosphoglycerate kinase 1                                               |
| 45 NP_000286 | 21361198  | serine (or cysteine) proteinase inhibitor, clade A (alpha-1 antiprotei  |
| 46 NP_000289 | 10835121  | pyruvate kinase, liver and RBC; Pyruvate kinase, liver and RBC type     |
| 47 NP_000292 | 4505881   | plasminogen                                                             |
| 48 NP_000299 | 4505989   | protective protein for beta-galactosidase; Protective protein for beta- |
| 49 NP_000304 | 4506117   | protein S (alpha); Protein S, alpha                                     |
| 50 NP_000311 | 4506359   | quinoid dihydropteridine reductase; dihydropteridine reductase          |
| 51 NP_000325 | 4506807   | sodium channel, voltage-gated, type IV, alpha; hyperkalemic periodic pa |
| 52 NP_000336 | 4507109   | alpha-synuclein isoform NACP140; non A4 component of amyloid precursor  |
| 53 NP_000338 | 27413156  | spectrin, beta, erythrocytic (includes spherocytosis, clinical type I)  |
| 54 NP_000353 | 4507513   | tissue inhibitor of metalloproteinase 3; Tissue inhibitor of metallopro |
| 55 NP_000356 | 4507645   | triosephosphate isomerase 1                                             |
| 56 NP_000357 | 27597085  | tropomyosin 1 (alpha)                                                   |
| 57 NP_000362 | 4507725   | transthyretin (prealbumin, amyloidosis type I); Transthyretin (prealbum |
| 58 NP_000365 | 9845522   | uroporphyrinogen decarboxylase; uroporphyrinogen III decarboxylase      |
| 59 NP_000368 | 4507909   | Wiskott-Aldrich syndrome protein; Wiskott-Aldrich syndrome (eczema-thro |
| 60 NP_000375 | 4502153   | apolipoprotein B precursor; apoB-100; apoB-48                           |

| Refseq ID     | gi Number | Protein Name/Description                                                |
|---------------|-----------|-------------------------------------------------------------------------|
| 61 NP_000382  | 5729770   | ceroid-lipofuscinosis, neuronal 2, late infantile (Jansky-Bielschowsky  |
| 62 NP_000389  | 4503327   | cytochrome b5 reductase membrane-bound isoform; diaphorase (NADH)       |
| 63 NP_000393  | 21614520  | glucose-6-phosphate dehydrogenase                                       |
| 64 NP_000398  | 4504073   | glycoprotein Ib beta polypeptide precursor                              |
| 65 NP_000399  | 4504085   | glycerol-3-phosphate dehydrogenase 2 (mitochondrial)                    |
| 66 NP_000403  | 4504489   | histidine-rich glycoprotein precursor; histidine-proline rich glycoprot |
| 67 NP_000405  | 4504505   | hydroxysteroid (17-beta) dehydrogenase 4                                |
| 68 NP_000410  | 4504745   | integrin alpha 2b precursor                                             |
| 69 NP_000412  | 4557697   | keratin 10; Keratin-10                                                  |
| 70 NP_000413  | 4557701   | keratin 17                                                              |
| 71 NP_000414  | 4557703   | keratin 2a                                                              |
| 72 NP_000415  | 4557890   | keratin 5; Keratin-5; 58 kda cytokeratin; keratin, type II cytoskeletal |
| 73 NP_000433  | 21314617  | platelet/endothelial cell adhesion molecule (CD31 antigen); platelet/e  |
| 74 NP_000436  | 4505877   | plectin 1, intermediate filament binding protein 500kDa; plectin 1, int |
| 75 NP_000445  | 4507149   | superoxide dismutase 1, soluble (amyotrophic lateral sclerosis 1 (adult |
| 76 NP_000467  | 4502011   | adenylate kinase 1                                                      |
| 77 NP_000468  | 4502027   | albumin precursor; PRO0883 protein                                      |
| 78 NP_000475  | 4502167   | amyloid beta (A4) precursor protein (protease nexin-II, Alzheimer disea |
| 79 NP_000476  | 4502171   | adenine phosphoribosyltransferase; AMP pyrophosphorylase; AMP diphospho |
| 80 NP_000479  | 4502261   | serine (or cysteine) proteinase inhibitor, clade C (antithrombin), memb |
| 81 NP_000497  | 4503635   | coagulation factor II precursor; prothrombin                            |
| 82 NP_000499  | 4503689   | fibrinogen, alpha chain isoform alpha-E preproprotein                   |
| 83 NP_000500  | 4503715   | fibrinogen, gamma chain isoform gamma-A precursor                       |
| 84 NP_000508  | 4504345   | alpha 2 globin                                                          |
| 85 NP_000509  | 4504349   | beta globin                                                             |
| 86 NP_000510  | 4504351   | delta globin                                                            |
| 87 NP_000517  | 15431310  | keratin 14; cytokeratin 14                                              |
| 88 NP_000520  | 4505127   | melanocortin 2 receptor; Melanocortin-2 receptor (ACTH receptor); melan |
| 89 NP_000543  | 4507907   | von Willebrand factor precursor; Coagulation factor VIII VWF (von Wille |
| 90 NP_000552  | 23065544  | glutathione S-transferase M1 isoform 1; HB subunit 4; glutathione S-al  |
| 91 NP_000565  | 10835143  | decay accelerating factor for complement (CD55, Cromer blood group sys  |
| 92 NP_000572  | 10834976  | glutathione peroxidase 1                                                |
| 93 NP_000574  | 9845255   | group-specific component (vitamin D binding protein); hDBP              |
| 94 NP_000583  | 4502501   | complement component 4B proprotein                                      |
| 95 NP_000589  | 4504617   | insulin-like growth factor binding protein 3                            |
| 96 NP_000598  | 9257232   | orosomuroid 1 precursor; Orosomuroid-1 (alpha-1-acid glycoprotein-1); a |
| 97 NP_000604  | 11321561  | hemopexin                                                               |
| 98 NP_000618  | 4557731   | latent transforming growth factor beta binding protein 1 precursor      |
| 99 NP_000627  | 10835187  | superoxide dismutase 2, mitochondrial                                   |
| 100 NP_000628 | 10835189  | glutathione reductase                                                   |
| 101 NP_000629 | 18201911  | vitronectin precursor; serum spreading factor; somatomedin B; compleme  |
| 102 NP_000631 | 10834992  | interleukin 13 receptor, alpha 2 precursor; interleukin 13 binding pro  |
| 103 NP_000651 | 10863873  | transforming growth factor, beta 1 (Camurati-Engelmann disease); trans  |
| 104 NP_000662 | 11496891  | class III alcohol dehydrogenase 5 chi subunit; Alcohol dehydrogenase (  |
| 105 NP_000688 | 4502051   | arachidonate 12-lipoxygenase; 12(S)-lipoxygenase                        |
| 106 NP_000691 | 4502101   | annexin I; annexin I (lipocortin I); lipocortin I                       |
| 107 NP_000703 | 4502417   | biliverdin reductase A                                                  |
| 108 NP_000704 | 4502419   | biliverdin reductase B (flavin reductase (NADPH)); flavin reductase (NA |
| 109 NP_000745 | 4502969   | catechol-O-methyltransferase isoform MB-COMT                            |
| 110 NP_000746 | 21618331  | carnitine acetyltransferase isoform 1 precursor                         |
| 111 NP_000792 | 4503725   | FK506-binding protein 1A; FK506-binding protein 1; FK506-binding protei |
| 112 NP_000806 | 4557609   | gamma-aminobutyric acid (GABA) A receptor, delta                        |
| 113 NP_000830 | 4504137   | glutamate receptor, metabotropic 2 precursor                            |
| 114 NP_000839 | 4504175   | glutathione S-transferase M2; glutathione S-transferase 4; GST, muscle; |
| 115 NP_000840 | 23065552  | glutathione S-transferase M3; glutathione S-transferase, Mu-3; brain G  |
| 116 NP_000843 | 4504183   | glutathione transferase; deafness, X-linked 7; fatty acid ethyl ester s |
| 117 NP_000847 | 4504213   | guanylate cyclase 1, soluble, alpha 3                                   |
| 118 NP_000848 | 4504215   | guanylate cyclase 1, soluble, beta 3                                    |
| 119 NP_000849 | 4504221   | guanylate kinase 1                                                      |
| 120 NP_000864 | 4504557   | intercellular adhesion molecule 2 precursor                             |

| Refseq ID     | gi Number | Protein Name/Description                                                |
|---------------|-----------|-------------------------------------------------------------------------|
| 121 NP_000879 | 9625002   | integrin, beta 6                                                        |
| 122 NP_000889 | 4505093   | monoamine oxidase B                                                     |
| 123 NP_000895 | 4505417   | NAD(P)H dehydrogenase, quinone 2; NAD(P)H menadione oxidoreductase-1, d |
| 124 NP_000909 | 20070125  | prolyl 4-hydroxylase, beta subunit; v-erb-a avian erythroblastic leuke  |
| 125 NP_000925 | 11386143  | alpha-2-plasmin inhibitor; alpha-2-antiplasmin                          |
| 126 NP_000929 | 4505941   | DNA directed RNA polymerase II polypeptide B; polymerase (RNA) II (DNA  |
| 127 NP_000933 | 4758950   | peptidylprolyl isomerase B (cyclophilin B)                              |
| 128 NP_000935 | 6715568   | protein phosphatase 3 (formerly 2B), catalytic subunit, alpha isoform ( |
| 129 NP_000936 | 4506025   | protein phosphatase 3, regulatory subunit B, alpha isoform 1; protein p |
| 130 NP_000953 | 18104967  | prostaglandin-endoperoxide synthase 1 isoform 1 precursor; prostagland  |
| 131 NP_000954 | 4506265   | prostaglandin-endoperoxide synthase 2 precursor; prostaglandin G/H synt |
| 132 NP_000960 | 14591909  | ribosomal protein L5; 60S ribosomal protein L5                          |
| 133 NP_000963 | 4506661   | ribosomal protein L7a; 60S ribosomal protein L7a; surfeit 3; surfeit lo |
| 134 NP_000995 | 4506671   | ribosomal protein P2; 60S acidic ribosomal protein P2; acidic ribosomal |
| 135 NP_000997 | 4506723   | ribosomal protein S3a; 40S ribosomal protein S3a; v-fos transformation  |
| 136 NP_001007 | 14277700  | ribosomal protein S12; 40S ribosomal protein S12                        |
| 137 NP_001045 | 4507303   | sulfotransferase family, cytosolic, 1A, phenol-preferring, member 2; th |
| 138 NP_001052 | 4507383   | thromboxane A synthase 1 (platelet, cytochrome P450, family 5, subfamil |
| 139 NP_001054 | 4557871   | transferrin                                                             |
| 140 NP_001055 | 4507521   | transketolase                                                           |
| 141 NP_001060 | 4507729   | tubulin, beta polypeptide                                               |
| 142 NP_001074 | 4505667   | phosphodiesterase 5A isoform 1; cGMP-binding cGMP-specific 3',5'-cyclic |
| 143 NP_001087 | 4501865   | ATP citrate lyase                                                       |
| 144 NP_001089 | 4501867   | aconitase 2                                                             |
| 145 NP_001091 | 4501881   | alpha 1 actin precursor; alpha skeletal muscle actin                    |
| 146 NP_001092 | 4501885   | beta actin; beta cytoskeletal actin                                     |
| 147 NP_001093 | 4501891   | actinin, alpha 1                                                        |
| 148 NP_001094 | 4501893   | actinin, alpha 2                                                        |
| 149 NP_001095 | 4557241   | skeletal muscle specific actinin, alpha 3                               |
| 150 NP_001101 | 4557251   | a disintegrin and metalloprotease domain 10                             |
| 151 NP_001110 | 29826319  | adducin 1 (alpha) isoform a; erythrocyte adducin alpha subunit          |
| 152 NP_001118 | 22027651  | adaptor-related protein complex 1 beta 1 subunit isoform a; beta-adapt  |
| 153 NP_001119 | 18104998  | adaptor-related protein complex 1, gamma 1 subunit; gamma adaptin; cla  |
| 154 NP_001142 | 4502097   | solute carrier family 25 (mitochondrial carrier; adenine nucleotide tra |
| 155 NP_001143 | 4502099   | solute carrier family 25 (mitochondrial carrier; adenine nucleotide tra |
| 156 NP_001145 | 4502107   | annexin V; endonexin II; anchorin CII; lipocortin V; placental anticoag |
| 157 NP_001148 | 4557317   | annexin A11; annexin XI; autoantigen, 56-kD; calyculin-associated annex |
| 158 NP_001152 | 4502125   | nudix-type motif 2; diadenosine 5',5"-P1,P4-tetraphosphate pyrophospho  |
| 159 NP_001156 | 4502139   | baculoviral IAP repeat-containing protein 3; apoptosis inhibitor 2; TNF |
| 160 NP_001166 | 10835002  | Rho GDP dissociation inhibitor (GDI) beta; Ly-GDI                       |
| 161 NP_001168 | 4502227   | ADP-ribosylation factor-like 1                                          |
| 162 NP_001187 | 4557361   | BH3 interacting domain death agonist; BH3-interacting domain death agon |
| 163 NP_001195 | 15451916  | bone morphogenetic protein receptor, type II isoform 1 precursor; type  |
| 164 NP_001203 | 4502491   | complement component 1, q subcomponent binding protein precursor; hyalu |
| 165 NP_001227 | 4502601   | carbonyl reductase 3; carbonyl reductase (NADPH) 3                      |
| 166 NP_001242 | 4557435   | CD68 antigen; Macrophage antigen CD68 (microsialin); macrosialin; scave |
| 167 NP_001272 | 4502849   | cytoskeleton-associated protein 1                                       |
| 168 NP_001273 | 4557469   | adaptor-related protein complex 2, beta 1 subunit; adaptin, beta 2 (bet |
| 169 NP_001274 | 4557471   | adaptor-related protein complex 1, sigma 1 subunit isoform 1; clathrin- |
| 170 NP_001275 | 4502861   | adaptor-related protein complex 3, sigma 1 subunit; clathrin-associated |
| 171 NP_001279 | 14251209  | chloride intracellular channel 1; p64CLCP; chloride channel ABP         |
| 172 NP_001306 | 4503069   | mitogen-activated protein kinase 14 isoform 1; cytokine suppressive ant |
| 173 NP_001307 | 29029559  | CSE1 chromosome segregation 1-like protein isoform a; cellular apoptos  |
| 174 NP_001312 | 4503101   | cysteine and glycine-rich protein 2; LIM domain only 5, smooth muscle;  |
| 175 NP_001313 | 4503105   | cystatin SA precursor; cystatin 2; cystatin S5; salivary cysteine (thio |
| 176 NP_001329 | 4503173   | coxsackie virus and adenovirus receptor; 46 kD coxsackievirus and adeno |
| 177 NP_001335 | 4503253   | defender against cell death 1                                           |
| 178 NP_001346 | 4503291   | D-dopachrome tautomerase                                                |
| 179 NP_001350 | 4503301   | 2,4-dienoyl CoA reductase 1 precursor; 4-enoyl-CoA reductase            |
| 180 NP_001377 | 4503377   | dihydropyrimidinase-like 2; collapsin response mediator protein hCRMP-2 |

| Refseq ID     | gi Number | Protein Name/Description                                                            |
|---------------|-----------|-------------------------------------------------------------------------------------|
| 181 NP_001388 | 4503443   | endothelin converting enzyme 1                                                      |
| 182 NP_001389 | 4503447   | peroxisomal enoyl-coenzyme A hydratase-like protein; delta3,5-delta2,4-             |
| 183 NP_001395 | 4503481   | eukaryotic translation elongation factor 1 gamma; elongation factor 1-g             |
| 184 NP_001399 | 13325064  | cadherin EGF LAG seven-pass G-type receptor 2; EGF-like-domain, multip              |
| 185 NP_001406 | 4503507   | eukaryotic translation initiation factor 2, subunit 3 gamma, 52kDa; euk             |
| 186 NP_001407 | 4503529   | eukaryotic translation initiation factor 4A, isoform 1                              |
| 187 NP_001409 | 4503539   | eukaryotic translation initiation factor 4 gamma, 2; Eukaryotic transla             |
| 188 NP_001410 | 4503551   | ELAV (embryonic lethal, abnormal vision, Drosophila)-like 1 (Hu antigen             |
| 189 NP_001419 | 4503571   | enolase 1; phosphopyruvate hydratase; MYC promoter-binding protein 1; n             |
| 190 NP_001427 | 12056465  | fibrillarin; 34-kD nucleolar scleroderma antigen; RNA, U3 small nucleo              |
| 191 NP_001435 | 4557581   | fatty acid binding protein 5 (psoriasis-associated); E-FABP                         |
| 192 NP_001440 | 21361122  | four and a half LIM domains 1; Four-and-a-half LIM domains 1                        |
| 193 NP_001447 | 4503745   | filamin 1 (actin-binding protein-280); filamin 1; filamin A, alpha (act             |
| 194 NP_001448 | 4503747   | filamin B, beta (actin binding protein 278); beta filamin; filamin 1 (a             |
| 195 NP_001449 | 4557597   | gamma filamin; filamin 2; filamin C, gamma (actin-binding protein-280);             |
| 196 NP_001456 | 4503821   | FYN binding protein (FYB-120/130); FYN-binding protein (FYB-120/130)                |
| 197 NP_001484 | 4503971   | GDP dissociation inhibitor 1; mental retardation, X-linked 41; mental r             |
| 198 NP_001485 | 6598323   | GDP dissociation inhibitor 2; rab GDP-dissociation inhibitor, beta                  |
| 199 NP_001487 | 22035694  | GDNF family receptor alpha 3 preproprotein; glial cell line-derived ne              |
| 200 NP_001512 | 4504205   | general transcription factor IIIC, polypeptide 2, beta 110kDa; general              |
| 201 NP_001531 | 4504517   | heat shock 27kDa protein 1; heat shock 27kD protein 1                               |
| 202 NP_001596 | 4501841   | alanyl-tRNA synthetase                                                              |
| 203 NP_001600 | 4501859   | acyl-Coenzyme A dehydrogenase, short/branched chain precursor                       |
| 204 NP_001606 | 4501889   | actin, gamma 2 propeptide; actin, alpha-3                                           |
| 205 NP_001616 | 4502013   | adenylate kinase 2 isoform a; adenylate kinase, mitochondrial; adenylat             |
| 206 NP_001631 | 23510451  | N-acylaminoacyl-peptide hydrolase; oxidized protein hydrolase; acylami              |
| 207 NP_001649 | 4502201   | ADP-ribosylation factor 1                                                           |
| 208 NP_001651 | 4502205   | ADP-ribosylation factor 4                                                           |
| 209 NP_001653 | 4502209   | ADP-ribosylation factor 5                                                           |
| 210 NP_001654 | 4502211   | ADP-ribosylation factor 6                                                           |
| 211 NP_001655 | 10835049  | ras homolog gene family, member A; Aplysia ras-related homolog 12; Rho              |
| 212 NP_001656 | 4502219   | ras homolog gene family, member G (rho G); RhoG                                     |
| 213 NP_001672 | 4502285   | ATPase, Ca <sup>++</sup> transporting, cardiac muscle, slow twitch 2 isoform 2; ATP |
| 214 NP_001677 | 4502295   | ATP synthase, H <sup>+</sup> transporting, mitochondrial F1 complex, beta polypepti |
| 215 NP_001678 | 4502297   | ATP synthase, H <sup>+</sup> transporting, mitochondrial F1 complex, delta subunit  |
| 216 NP_001679 | 21361565  | ATP synthase, H <sup>+</sup> transporting, mitochondrial F0 complex, subunit b, is  |
| 217 NP_001681 | 19913424  | ATPase, H <sup>+</sup> transporting, lysosomal 70kD, V1 subunit A, isoform 1; V-AT  |
| 218 NP_001683 | 19913426  | ATPase, H <sup>+</sup> transporting, lysosomal 56/58kD, V1 subunit B, isoform 1; A  |
| 219 NP_001688 | 4502303   | mitochondrial ATP synthase, O subunit; ATP synthase, H <sup>+</sup> transporting, m |
| 220 NP_001700 | 25306267  | brain-derived neurotrophic factor isoform a preproprotein                           |
| 221 NP_001719 | 4502459   | basigin; OK blood group; emmprin; collagenase stimulatory factor; M6 an             |
| 222 NP_001723 | 4502475   | butyrophilin, subfamily 1, member A1                                                |
| 223 NP_001734 | 4502549   | calmodulin 2 (phosphorylase kinase, delta); phosphorylase kinase delta              |
| 224 NP_001737 | 10716563  | calnexin                                                                            |
| 225 NP_001740 | 4502565   | calpain, small subunit 1; calpain, small polypeptide; calcium-dependent             |
| 226 NP_001743 | 4557014   | catalase                                                                            |
| 227 NP_001748 | 4502599   | carbonyl reductase 1; carbonyl reductase (NADPH); carbonyl reductase (N             |
| 228 NP_001753 | 4502643   | chaperonin containing TCP1, subunit 6A (zeta 1); chaperonin containing              |
| 229 NP_001760 | 4502693   | CD9 antigen; motility related protein; leukocyte antigen MIC3; antigen              |
| 230 NP_001779 | 4502695   | cell division cycle 10; cell division cycle 10 (homolog to CDC10 of S.c             |
| 231 NP_001782 | 4757952   | cell division cycle 42 isoform 1; cell division cycle 42 (GTP-binding p             |
| 232 NP_001785 | 14589893  | cadherin 4, type 1 preproprotein; cadherin 4, R-cadherin (retinal); R-              |
| 233 NP_001805 | 4503141   | cathepsin C isoform a preproprotein; dipeptidyl-peptidase I; dipeptidyl             |
| 234 NP_001822 | 4502905   | clusterin; complement-associated protein SP-40                                      |
| 235 NP_001830 | 4502923   | calponin 3; calponin, acidic                                                        |
| 236 NP_001852 | 4502981   | cytochrome c oxidase subunit IV isoform 1 precursor; cytochrome c oxida             |
| 237 NP_001853 | 17017988  | cytochrome c oxidase subunit Vb precursor; cytochrome c oxidase polype              |
| 238 NP_001854 | 4502985   | cytochrome c oxidase subunit VIb; human cytochrome oxidase subunit VIb              |
| 239 NP_001856 | 4502989   | cytochrome c oxidase subunit VIIa polypeptide 2 (liver) precursor; hepa             |
| 240 NP_001858 | 4502993   | cytochrome c oxidase subunit VIIc precursor; cytochrome-c oxidase chain             |

| Refseq ID     | gi Number | Protein Name/Description                                                |
|---------------|-----------|-------------------------------------------------------------------------|
| 241 NP_001889 | 19882251  | cystatin SN precursor; cystatin 1; cystatin SA-I; cysteine proteinase   |
| 242 NP_001890 | 4503109   | cystatin S precursor; cystatin 4                                        |
| 243 NP_001893 | 21361334  | cystathionase isoform 1; homoserine deaminase; homoserine dehydratase;  |
| 244 NP_001907 | 21359867  | cytochrome c-1                                                          |
| 245 NP_001914 | 13435359  | damage-specific DNA binding protein 1; damage-specific DNA binding pro  |
| 246 NP_001924 | 19923748  | dihydrolipoamide S-succinyltransferase (E2 component of 2-oxo-glutarat  |
| 247 NP_001939 | 4503423   | dUTP pyrophosphatase                                                    |
| 248 NP_001944 | 4503445   | endothelial cell growth factor 1 (platelet-derived); thymidine phosphor |
| 249 NP_001950 | 4503477   | eukaryotic translation elongation factor 1 beta 2; eukaryotic translati |
| 250 NP_001951 | 25453472  | eukaryotic translation elongation factor 1 delta isoform 2; guanine nu  |
| 251 NP_001958 | 4503531   | eukaryotic translation initiation factor 4A, isoform 2                  |
| 252 NP_001961 | 4503545   | eukaryotic translation initiation factor 5A; eIF5A1; eIF5A              |
| 253 NP_001966 | 5803011   | enolase 2; enolase-2, gamma, neuronal; neurone-specific enolase; neuron |
| 254 NP_001967 | 4503573   | enolase 3; enolase-3, beta, muscle; muscle specific enolase; beta enola |
| 255 NP_001976 | 4503609   | electron-transfer-flavoprotein, beta polypeptide; electron-transferring |
| 256 NP_002009 | 4503743   | flightless I homolog                                                    |
| 257 NP_002017 | 16933542  | fibronectin 1 isoform 1 preproprotein; cold-insoluble globulin          |
| 258 NP_002028 | 4503823   | protein-tyrosine kinase fyn isoform a; proto-oncogene tyrosine-protein  |
| 259 NP_002037 | 7669492   | glyceraldehyde-3-phosphate dehydrogenase                                |
| 260 NP_002038 | 6996010   | glycyl-tRNA synthetase; GlyRS; glycine tRNA ligase                      |
| 261 NP_002046 | 4503979   | glial fibrillary acidic protein                                         |
| 262 NP_002061 | 4504041   | guanine nucleotide binding protein (G protein), alpha inhibiting activi |
| 263 NP_002063 | 4504045   | guanine nucleotide binding protein (G protein), q polypeptide           |
| 264 NP_002064 | 4504051   | guanine nucleotide binding protein, alpha z polypeptide; transducin alp |
| 265 NP_002065 | 11321585  | guanine nucleotide-binding protein, beta-1 subunit; G protein, beta-1   |
| 266 NP_002067 | 4504061   | glucosamine (N-acetyl)-6-sulfatase precursor; N-acetylglucosamine-6-sul |
| 267 NP_002069 | 6715600   | golgi autoantigen, golgin subfamily a, 4; golgin 245; golgin-240; p230  |
| 268 NP_002076 | 4504107   | glutathione peroxidase 4; phospholipid hydroperoxidase; sperm nucleus g |
| 269 NP_002077 | 4504111   | growth factor receptor-bound protein 2                                  |
| 270 NP_002100 | 6996014   | histidyl-tRNA synthetase; histidine-tRNA ligase; HisRS; histidine trans |
| 271 NP_002107 | 24797067  | major histocompatibility complex, class I, A precursor; HLA-A1 class I  |
| 272 NP_002108 | 19557677  | major histocompatibility complex, class I, C precursor; HLA class I hi  |
| 273 NP_002118 | 4504415   | major histocompatibility complex, class I, G precursor; HLA-G histocomp |
| 274 NP_002128 | 4504447   | heterogeneous nuclear ribonucleoprotein A2/B1 isoform A2; heterogeneous |
| 275 NP_002131 | 14165439  | heterogeneous nuclear ribonucleoprotein K isoform a; dC-stretch bindin  |
| 276 NP_002134 | 19913446  | hippocalcin; neuron specific calcium-binding protein hippocalcin        |
| 277 NP_002140 | 19913441  | hippocalcin-like 1; visinin-like protein 3; calcium-binding protein BD  |
| 278 NP_002143 | 4504487   | histidine-rich calcium-binding protein precursor; histidine-rich calciu |
| 279 NP_002146 | 4504515   | heat shock 70kDa protein 6 (HSP70B'); heat shock 70kD protein 6 (HSP70B |
| 280 NP_002147 | 4504521   | heat shock 60kDa protein 1 (chaperonin); mitochondrial matrix protein P |
| 281 NP_002148 | 4504523   | heat shock 10kDa protein 1 (chaperonin 10); heat shock 10kD protein 1 ( |
| 282 NP_002159 | 28178832  | isocitrate dehydrogenase 2 (NADP+), mitochondrial precursor; isocitrat  |
| 283 NP_002178 | 24497438  | interleukin 12B precursor; natural killer cell stimulatory factor-2; i  |
| 284 NP_002194 | 4504743   | integrin alpha 2 precursor; Integrin, alpha-2 (CD49B; alpha-2 subunit o |
| 285 NP_002196 | 4504751   | integrin alpha 5 precursor; fibronectin receptor, alpha subunit; very I |
| 286 NP_002202 | 19743813  | integrin beta 1 isoform 1A precursor; integrin VLA-4 beta subunit; fib  |
| 287 NP_002214 | 4504793   | inositol 1,4,5-triphosphate receptor, type 2                            |
| 288 NP_002215 | 4504795   | inositol 1,4,5-triphosphate receptor, type 3                            |
| 289 NP_002256 | 19923142  | karyopherin beta 1; nuclear factor p97; importin 90; importin beta-1 s  |
| 290 NP_002268 | 14917115  | type I hair keratin 1; Ha-1; hard keratin, type I, 1; keratin, hair, a  |
| 291 NP_002272 | 4504931   | keratin, hair, basic, 1; hard keratin, type II, 1                       |
| 292 NP_002283 | 9845496   | laminin, beta 2 precursor; laminin S                                    |
| 293 NP_002286 | 9845502   | laminin receptor 1; Laminin receptor-1 (67kD); laminin receptor 1 (67kD |
| 294 NP_002291 | 4557032   | lactate dehydrogenase B                                                 |
| 295 NP_002292 | 4504973   | lactate dehydrogenase C                                                 |
| 296 NP_002296 | 4504981   | beta-galactosidase binding lectin precursor; Lectin, galactose-binding, |
| 297 NP_002346 | 4505061   | cation-dependent mannose-6-phosphate receptor precursor; Mr 46,000 Man6 |
| 298 NP_002387 | 4505145   | malic enzyme 2, NAD(+)-dependent, mitochondrial; Malic enzyme, mitochon |
| 299 NP_002406 | 4505185   | macrophage migration inhibitory factor (glycosylation-inhibiting factor |
| 300 NP_002427 | 4505237   | palmitoylated membrane protein 1; membrane protein, palmitoylated 1 (55 |

| Refseq ID     | gi Number | Protein Name/Description                                                |
|---------------|-----------|-------------------------------------------------------------------------|
| 301 NP_002435 | 4505257   | moesin                                                                  |
| 302 NP_002442 | 4505273   | 5'-methylthioadenosine phosphorylase                                    |
| 303 NP_002443 | 21361346  | nudix (nucleoside diphosphate linked moiety X)-type motif 1; mutT (E.   |
| 304 NP_002463 | 4505301   | myosin, heavy polypeptide 8, skeletal muscle, perinatal                 |
| 305 NP_002464 | 12667788  | myosin, heavy polypeptide 9, non-muscle                                 |
| 306 NP_002465 | 13124879  | smooth muscle myosin heavy chain 11 isoform SM1                         |
| 307 NP_002466 | 4505303   | myosin alkali light chain 1 slow a; myosin light chain 1, slow-twitch m |
| 308 NP_002467 | 4557038   | atrial/embryonic alkali myosin light chain; myosin, atrial/fetal muscle |
| 309 NP_002480 | 4505357   | NADH dehydrogenase (ubiquinone) 1 alpha subcomplex, 4, 9kDa; NADH dehyd |
| 310 NP_002481 | 4505359   | NADH dehydrogenase (ubiquinone) 1 alpha subcomplex, 6, 14kDa; NADH dehy |
| 311 NP_002486 | 4505369   | NADH dehydrogenase (ubiquinone) Fe-S protein 4, 18kDa (NADH-coenzyme Q  |
| 312 NP_002499 | 4505395   | nidogen (enactin); Nidogen; nidogen (entactin)                          |
| 313 NP_002503 | 4505409   | non-metastatic cells 2, protein (NM23B) expressed in; Non-metastatic ce |
| 314 NP_002511 | 10835063  | nucleophosmin (nucleolar phosphoprotein B23, numatrin); Nucleophosmin   |
| 315 NP_002515 | 4505451   | neuroblastoma RAS viral (v-ras) oncogene homolog; v-ras neuroblastoma R |
| 316 NP_002558 | 4505621   | prostatic binding protein; phosphatidylethanolamine binding protein     |
| 317 NP_002563 | 4505585   | platelet-activating factor acetylhydrolase, isoform Ib, beta subunit 30 |
| 318 NP_002565 | 4505591   | peroxiredoxin 1; natural killer-enhancing factor A; proliferation-assoc |
| 319 NP_002568 | 4505599   | p21-activated kinase 2; novel serine kinase; hPAK65                     |
| 320 NP_002578 | 27754771  | protocadherin 1 isoform 1 precursor; protocadherin 42; cadherin-like p  |
| 321 NP_002583 | 4505641   | proliferating cell nuclear antigen                                      |
| 322 NP_002592 | 4505671   | phosphodiesterase 6D, cGMP-specific, rod, delta                         |
| 323 NP_002604 | 4505695   | 3-phosphoinositide dependent protein kinase-1; PkB kinase               |
| 324 NP_002610 | 4505733   | platelet factor 4 (chemokine (C-X-C motif) ligand 4); platelet factor 4 |
| 325 NP_002611 | 4505735   | platelet factor 4 variant 1; Platelet factor 4, variant 1 (PF4-like)    |
| 326 NP_002613 | 21536449  | prefoldin 1; prefoldin subunit 1                                        |
| 327 NP_002614 | 12408677  | prefoldin 4                                                             |
| 328 NP_002617 | 21361070  | phosphofructokinase, liver; Phosphofructokinase, liver type; human liv  |
| 329 NP_002618 | 11321601  | phosphofructokinase, platelet; Phosphofructokinase, platelet type       |
| 330 NP_002620 | 4505753   | phosphoglycerate mutase 1 (brain); Phosphoglycerate mutase A, nonmuscle |
| 331 NP_002622 | 4505759   | phosphogluconate dehydrogenase; 6-phosphogluconate dehydrogenase        |
| 332 NP_002624 | 21361621  | phosphoglucomutase 1                                                    |
| 333 NP_002625 | 4505773   | prohibitin                                                              |
| 334 NP_002626 | 4505775   | phosphate carrier precursor isoform 1b; phosphate carrier, mitochondria |
| 335 NP_002643 | 4505821   | prolactin-induced protein; prolactin-inducible protein                  |
| 336 NP_002645 | 4505839   | pyruvate kinase, muscle; Pyruvate kinase-3; Thyroid hormone-binding pro |
| 337 NP_002655 | 4505879   | pleckstrin; p47                                                         |
| 338 NP_002666 | 4505903   | promyelocytic leukemia protein isoform 6; promyelocytic leukemia, induc |
| 339 NP_002679 | 9945439   | peanut-like 1; septin HCDCREL-1                                         |
| 340 NP_002695 | 4505981   | pro-platelet basic protein (includes platelet basic protein, bet; Pro-p |
| 341 NP_002700 | 4506005   | protein phosphatase 1, catalytic subunit, beta isoform                  |
| 342 NP_002717 | 20149545  | prolyl endopeptidase                                                    |
| 343 NP_002718 | 4506045   | proteoglycan 1, secretory granule; Proteoglycan 1, secretory granule (p |
| 344 NP_002722 | 4506057   | protein kinase, cAMP-dependent, catalytic, beta                         |
| 345 NP_002725 | 4506063   | protein kinase, cAMP-dependent, regulatory, type I, alpha; tissue-speci |
| 346 NP_002727 | 4506065   | protein kinase, cAMP-dependent, regulatory, type II, beta               |
| 347 NP_002729 | 20127450  | protein kinase C, beta 1; Protein kinase C, beta 1 polypeptide          |
| 348 NP_002734 | 4506077   | protein kinase C substrate 80K-H; glucosidase II, beta subunit; AGE-bin |
| 349 NP_002760 | 4506145   | protease, serine, 1 preproprotein; cationic trypsinogen; trypsinogen A; |
| 350 NP_002762 | 21536452  | mesotrypsin preproprotein; trypsin 4, brain; protease, serine, 4; meso  |
| 351 NP_002778 | 4506181   | proteasome alpha 2 subunit; proteasome subunit HC3; proteasome componen |
| 352 NP_002779 | 4506183   | proteasome alpha 3 subunit isoform 1; proteasome subunit C8; macropain  |
| 353 NP_002780 | 4506185   | proteasome alpha 4 subunit; proteasome component C9; proteasome subunit |
| 354 NP_002781 | 23110942  | proteasome alpha 5 subunit; proteasome component 5; macropain subunit   |
| 355 NP_002782 | 23110944  | proteasome alpha 6 subunit; prosomal P27K protein; proteasome subunit   |
| 356 NP_002783 | 4506189   | proteasome alpha 7 subunit isoform 1; proteasome subunit RC6-1; proteas |
| 357 NP_002784 | 4506193   | proteasome beta 1 subunit; proteasome subunit HC5; proteasome component |
| 358 NP_002785 | 4506195   | proteasome beta 2 subunit; proteasome subunit, beta type, 2; macropain  |
| 359 NP_002786 | 22538465  | proteasome beta 3 subunit; proteasome theta chain; proteasome chain 13  |
| 360 NP_002787 | 22538467  | proteasome beta 4 subunit; proteasome subunit, beta type, 4; proteasom  |

| Refseq ID     | gi Number | Protein Name/Description                                                |
|---------------|-----------|-------------------------------------------------------------------------|
| 361 NP_002789 | 23110925  | proteasome beta 6 subunit; proteasome subunit Y; proteasome subunit be  |
| 362 NP_002791 | 4506205   | proteasome beta 9 subunit isoform 1 proprotein; proteasome subunit, bet |
| 363 NP_002792 | 4506191   | proteasome beta 10 subunit proprotein; proteasome subunit MECL1; protea |
| 364 NP_002793 | 24430151  | proteasome 26S ATPase subunit 1; proteasome 26S subunit, ATPase, 1; 26  |
| 365 NP_002796 | 24497435  | proteasome 26S ATPase subunit 5; thyroid receptor interactor 1; protea  |
| 366 NP_002798 | 25777600  | proteasome 26S non-ATPase subunit 1; 26S proteasome non-ATPase regulat  |
| 367 NP_002808 | 28872728  | proteasome 26S non-ATPase subunit 13 isoform 1; 26S proteasome subunit  |
| 368 NP_002809 | 4506237   | proteasome (prosome, macropain) activator subunit 2 (PA28 beta); Protea |
| 369 NP_002810 | 4506243   | polypyrimidine tract-binding protein 1 isoform a; RNA-binding protein;  |
| 370 NP_002822 | 18104989  | protein tyrosine phosphatase, non-receptor type 6 isoform 1; protein-t  |
| 371 NP_002826 | 18375652  | protein tyrosine phosphatase, non-receptor type 12; protein-tyrosine p  |
| 372 NP_002831 | 4506311   | protein tyrosine phosphatase, receptor type, F isoform 1 precursor; pro |
| 373 NP_002834 | 18860900  | protein tyrosine phosphatase, receptor type, J precursor; protein tyro  |
| 374 NP_002853 | 21361370  | phosphorylase, glycogen; brain                                          |
| 375 NP_002854 | 4506353   | phosphorylase, glycogen; liver (Hers disease, glycogen storage disease  |
| 376 NP_002856 | 4506365   | RAB2, member RAS oncogene family                                        |
| 377 NP_002858 | 19923750  | RAB3B, member RAS oncogene family; Brain antigen RAB3B                  |
| 378 NP_002860 | 19923231  | RAB6A, member RAS oncogene family; Oncogene RAB6; RAB6, member RAS onc  |
| 379 NP_002861 | 4506363   | RAB13, member RAS oncogene family; RAS-associated protein RAB13         |
| 380 NP_002863 | 4506381   | ras-related C3 botulinum toxin substrate 2; Ras-related C3 botulinum to |
| 381 NP_002872 | 4506405   | v-ral simian leukemia viral oncogene homolog B; RAS-like protein B; GTP |
| 382 NP_002873 | 4506407   | RAN binding protein 1                                                   |
| 383 NP_002875 | 4506413   | RAP1A, member of RAS oncogene family; RAS-related protein RAP1A         |
| 384 NP_002877 | 4506417   | RAP2B, member of RAS oncogene family                                    |
| 385 NP_002878 | 15149476  | arginyl-tRNA synthetase                                                 |
| 386 NP_002880 | 4506427   | retinoic acid receptor responder (tazarotene induced) 2                 |
| 387 NP_002897 | 4506467   | radixin                                                                 |
| 388 NP_002916 | 4506505   | regulator of G-protein signaling 10                                     |
| 389 NP_002930 | 21361547  | ribonuclease/angiogenin inhibitor; Placental ribonuclease inhibitor     |
| 390 NP_002932 | 4506569   | roundabout 1 isoform a; roundabout 1; axon guidance receptor            |
| 391 NP_002941 | 4506675   | ribophorin I                                                            |
| 392 NP_002942 | 4506677   | ribophorin II                                                           |
| 393 NP_002945 | 4506713   | ubiquitin and ribosomal protein S27a precursor; ubiquitin carboxyl exte |
| 394 NP_002952 | 4506765   | S100 calcium-binding protein A4; 18A2; 42A; S100 calcium-binding protei |
| 395 NP_002954 | 4506769   | S100 calcium-binding protein A7; psoriasin 1                            |
| 396 NP_002955 | 21614544  | S100 calcium-binding protein A8; cystic fibrosis antigen; calgranulin   |
| 397 NP_002956 | 4506773   | S100 calcium-binding protein A9; calgranulin B                          |
| 398 NP_002970 | 19923233  | sterol carrier protein 2                                                |
| 399 NP_002976 | 22538814  | small inducible cytokine A5 precursor; T-cell specific protein p288; T  |
| 400 NP_002996 | 4506877   | selectin P precursor; Selectin P (granulocyte membrane protein, 140kD;  |
| 401 NP_003013 | 4506925   | SH3 domain binding glutamic acid-rich protein like; SH3-binding domain  |
| 402 NP_003043 | 4506985   | solute carrier family 34 (sodium phosphate), member 1; solute carrier f |
| 403 NP_003096 | 4507157   | sortilin-related receptor containing LDLR class A repeats preproprotein |
| 404 NP_003109 | 4507171   | secreted protein, acidic, cysteine-rich (osteonectin); Osteonectin (sec |
| 405 NP_003118 | 4507191   | spectrin, alpha, non-erythrocytic 1 (alpha-fodrin)                      |
| 406 NP_003119 | 4507195   | spectrin, beta, non-erythrocytic 1; Spectrin, beta, nonerythrocytic-1 ( |
| 407 NP_003121 | 4507207   | sorcin; Sorcin (class 4 gene)                                           |
| 408 NP_003134 | 4507231   | single-stranded DNA binding protein; single-stranded DNA-binding protei |
| 409 NP_003141 | 21618338  | signal transducer and activator of transcription 3 isoform 2; acute-ph  |
| 410 NP_003143 | 21618342  | signal transducer and activator of transcription 5A; signal transducer  |
| 411 NP_003147 | 21070997  | stromal interaction molecule 1 precursor                                |
| 412 NP_003157 | 10835035  | sulfotransferase family, cytosolic, 1A, phenol-preferring, member 3; t  |
| 413 NP_003168 | 21361553  | spleen tyrosine kinase                                                  |
| 414 NP_003182 | 4507367   | threonyl-tRNA synthetase; threonine--tRNA ligase                        |
| 415 NP_003237 | 4507485   | thrombospondin 1                                                        |
| 416 NP_003238 | 4507487   | thrombospondin 2                                                        |
| 417 NP_003245 | 4507509   | tissue inhibitor of metalloproteinase 1 precursor; Erythroid-potentiati |
| 418 NP_003268 | 4502879   | transmembrane protein claudin 5; androgen withdrawal and apoptosis indu |
| 419 NP_003279 | 4507643   | tumor protein D52-like 2; hD54                                          |
| 420 NP_003280 | 4507649   | tropomyosin 2 (beta)                                                    |

| Refseq ID     | gi Number | Protein Name/Description                                                |
|---------------|-----------|-------------------------------------------------------------------------|
| 421 NP_003281 | 4507651   | tropomyosin 4                                                           |
| 422 NP_003282 | 4507657   | tripeptidyl peptidase II                                                |
| 423 NP_003286 | 4507669   | tumor protein, translationally-controlled 1; fortilin; histamine-releas |
| 424 NP_003290 | 4507677   | tumor rejection antigen (gp96) 1; Tumor rejection antigen-1 (gp96); glu |
| 425 NP_003303 | 17402865  | thiosulfate sulfurtransferase; rhodanese                                |
| 426 NP_003312 | 21359837  | Tu translation elongation factor, mitochondrial                         |
| 427 NP_003320 | 4507745   | thioredoxin                                                             |
| 428 NP_003321 | 4507747   | thioredoxin reductase 1                                                 |
| 429 NP_003325 | 23510338  | ubiquitin-activating enzyme E1; A1S9T and BN75 temperature sensitivity  |
| 430 NP_003326 | 4507767   | ubiquitin-activating enzyme E1-like; Ubiquitin-activating enzyme-2; ubi |
| 431 NP_003331 | 4507777   | ubiquitin-conjugating enzyme E2D 3 (UBC4/5 homolog, yeast); UbcH5C; ubi |
| 432 NP_003335 | 4507783   | ubiquitin-conjugating enzyme E2H (UBC8 homolog, yeast); ubiquitin-conju |
| 433 NP_003338 | 4507789   | ubiquitin-conjugating enzyme E2L 3                                      |
| 434 NP_003339 | 4507793   | ubiquitin-conjugating enzyme E2N (UBC13 homolog, yeast); ubiquitin-conj |
| 435 NP_003340 | 4507795   | ubiquitin-conjugating enzyme E2 variant 1 isoform b; DNA-binding protei |
| 436 NP_003341 | 4507797   | ubiquitin-conjugating enzyme E2 variant 2; 1 alpha,25-dihydroxyvitamin  |
| 437 NP_003356 | 4507841   | ubiquinol-cytochrome c reductase core protein I                         |
| 438 NP_003361 | 4507869   | vasodilator-stimulated phosphoprotein                                   |
| 439 NP_003364 | 4507877   | vinculin isoform VCL                                                    |
| 440 NP_003365 | 4507879   | voltage-dependent anion channel 1                                       |
| 441 NP_003370 | 21614499  | villin 2; Villin-2; cytovillin                                          |
| 442 NP_003384 | 4507931   | wingless-type MMTV integration site family, member 8B precursor         |
| 443 NP_003394 | 4507955   | YY1 transcription factor                                                |
| 444 NP_003395 | 4507949   | tyrosine 3-monooxygenase/tryptophan 5-monooxygenase activation protein, |
| 445 NP_003396 | 4507951   | tyrosine 3/tryptophan 5 -monooxygenase activation protein, eta polypept |
| 446 NP_003397 | 4507953   | tyrosine 3/tryptophan 5 -monooxygenase activation protein, zeta polypep |
| 447 NP_003452 | 4508047   | zyxin                                                                   |
| 448 NP_003460 | 4506801   | secretogranin II precursor; Chromogranin C (secretogranin II); secreton |
| 449 NP_003464 | 4507249   | signal transducing adaptor molecule 1; signal transducing adaptor molec |
| 450 NP_003470 | 4506285   | protein tyrosine phosphatase type IVA, member 2 isoform 1; protein tyro |
| 451 NP_003472 | 4507855   | Ubiquitin isopeptidase T; Ubiquitin-specific protease-5 (ubiquitin isop |
| 452 NP_003473 | 4505197   | myeloid/lymphoid or mixed-lineage leukemia 2; ALL1-related gene         |
| 453 NP_003555 | 4507357   | transgelin 2; SM22-alpha homolog                                        |
| 454 NP_003560 | 4507295   | syntaxin 7                                                              |
| 455 NP_003565 | 20070156  | vessicle-associated membrane protein (VAMP)-associated protein of 33 k  |
| 456 NP_003567 | 20070158  | serine/threonine kinase 24 (STE20 homolog, yeast); STE20-like kinase 3  |
| 457 NP_003602 | 4503179   | oral-facial-digital syndrome 1; chromosome X open reading frame 5; oral |
| 458 NP_003647 | 4502553   | calcium/calmodulin-dependent protein kinase I                           |
| 459 NP_003650 | 4501993   | alkylglycerone phosphate synthase precursor                             |
| 460 NP_003669 | 19923178  | chromosome 22 open reading frame 19; gene from NF2/meningioma region o  |
| 461 NP_003671 | 4507947   | tyrosyl-tRNA synthetase; tyrosyl-tRNA synthetase; tyrosyl tRNA ligase   |
| 462 NP_003680 | 4502021   | aldo-keto reductase family 7, member A2 (aflatoxin aldehyde reductase); |
| 463 NP_003734 | 22538455  | nuclear receptor coactivator 1 isoform 1                                |
| 464 NP_003737 | 4505813   | cytoplasmic dynein light polypeptide; dynein, cytoplasmic, light chain  |
| 465 NP_003752 | 14043026  | vesicle-associated membrane protein 8; endobrevin                       |
| 466 NP_003755 | 4507287   | syntaxin 11                                                             |
| 467 NP_003759 | 4505705   | phosphoprotein enriched in astrocytes 15; Phosphoprotein enriched in as |
| 468 NP_003765 | 4503901   | polypeptide N-acetylgalactosaminyltransferase 4; UDP-N-acetyl-alpha-D-g |
| 469 NP_003786 | 4507143   | sorting nexin 3 isoform a; sorting nexin 3A                             |
| 470 NP_003816 | 18765729  | synaptosomal-associated protein 23 isoform SNAP23A; synaptosomal-assoc  |
| 471 NP_003818 | 4505329   | N-ethylmaleimide-sensitive factor attachment protein, alpha; alpha-SNAP |
| 472 NP_003840 | 11321581  | succinate-CoA ligase, GDP-forming, alpha subunit                        |
| 473 NP_003851 | 4502389   | barrier to autointegration factor 1; breakpoint cluster region protein, |
| 474 NP_003865 | 4502687   | CD84 antigen (leukocyte antigen); leukocyte antigen CD84                |
| 475 NP_003869 | 4503987   | gamma-glutamyl hydrolase precursor; conjugase; folypolygammaglutamyl h  |
| 476 NP_003878 | 4502249   | development- and differentiation-enhancing factor 2; PYK2 C terminus-as |
| 477 NP_003906 | 4503013   | copine I                                                                |
| 478 NP_003907 | 22027655  | adaptor-related protein complex 1 sigma 2 subunit; clathrin adaptor co  |
| 479 NP_003921 | 16753212  | src family associated phosphoprotein 2; src kinase-associated phosphop  |
| 480 NP_003922 | 4507913   | WAS protein family, member 1; WASP family Verprolin-homologous protein; |



| Refseq ID     | gi Number | Protein Name/Description                                                            |
|---------------|-----------|-------------------------------------------------------------------------------------|
| 481 NP_003928 | 4504937   | kynureninase (L-kynurenine hydrolase); l-kynurenine hydrolase                       |
| 482 NP_003965 | 4503359   | docking protein 2, 56kD                                                             |
| 483 NP_004026 | 4757712   | acyl-Coenzyme A oxidase isoform a; acyl-coenzyme A oxidase 1                        |
| 484 NP_004028 | 21264318  | adenosine monophosphate deaminase 2 (isoform L)                                     |
| 485 NP_004030 | 4757756   | annexin A2; annexin II; annexin II (lipocortin II); calpactin I, heavy              |
| 486 NP_004032 | 10880136  | arrestin beta 1 isoform A                                                           |
| 487 NP_004035 | 20127454  | 5-aminoimidazole-4-carboxamide ribonucleotide formyltransferase/IMP cy              |
| 488 NP_004037 | 4757810   | ATP synthase, H <sup>+</sup> transporting, mitochondrial F1 complex, alpha subunit, |
| 489 NP_004039 | 4757826   | beta-2-microglobulin                                                                |
| 490 NP_004060 | 4757996   | adaptor-related protein complex 2, sigma 1 subunit isoform AP17; clathr             |
| 491 NP_004068 | 4758076   | citrate synthase precursor; Citrate synthase, mitochondrial                         |
| 492 NP_004069 | 4758086   | cysteine and glycine-rich protein 1; cysteine-rich protein; LIM-domain              |
| 493 NP_004073 | 13259510  | dynactin 1 isoform 1; dynactin 1 (p150, Glued (Drosophila) homolog); p              |
| 494 NP_004081 | 4758208   | dual specificity phosphatase 3; vaccinia virus phosphatase VH1-related;             |
| 495 NP_004083 | 12707570  | mitochondrial short-chain enoyl-coenzyme A hydratase 1 precursor                    |
| 496 NP_004090 | 21361755  | stomatin; erythrocyte membrane protein band 7.2 (stomatin)                          |
| 497 NP_004095 | 21618359  | fatty acid synthase                                                                 |
| 498 NP_004108 | 4758384   | FK506 binding protein 5; FK506-binding protein 5; 51 kDa FK506-binding              |
| 499 NP_004115 | 4758442   | glia maturation factor, beta                                                        |
| 500 NP_004125 | 24234688  | heat shock 70kDa protein 9B precursor; heat shock 70kD protein 9; stre              |
| 501 NP_004136 | 4758750   | myosin IXB                                                                          |
| 502 NP_004146 | 4758906   | serine (or cysteine) proteinase inhibitor, clade B (ovalbumin), member              |
| 503 NP_004150 | 4758970   | proteasome beta 8 subunit isoform E1 proprotein; proteasome subunit, be             |
| 504 NP_004152 | 4758988   | RAB1A, member RAS oncogene family; RAB1, member RAS oncogene family                 |
| 505 NP_004153 | 19923262  | RAB5A, member RAS oncogene family; RAS-associated protein RAB5A                     |
| 506 NP_004154 | 5729997   | RAB27B, member RAS oncogene family                                                  |
| 507 NP_004159 | 4759080   | succinate dehydrogenase complex, subunit A, flavoprotein precursor; suc             |
| 508 NP_004160 | 22547186  | serine hydroxymethyltransferase 1 (soluble) isoform 1; cytoplasmic ser              |
| 509 NP_004175 | 4759316   | tryptophanyl-tRNA synthetase; interferon-induced protein 53                         |
| 510 NP_004199 | 4757732   | programmed cell death 8 isoform 1; apoptosis-inducing factor                        |
| 511 NP_004209 | 4758986   | RAB11B, member RAS oncogene family; RAB11B, member of RAS oncogene fami             |
| 512 NP_004243 | 4759140   | solute carrier family 9 (sodium/hydrogen exchanger), isoform 3 regulato             |
| 513 NP_004246 | 4758038   | cytochrome c oxidase subunit Va precursor; cytochrome c oxidase polypep             |
| 514 NP_004252 | 4759096   | 15 kDa selenoprotein                                                                |
| 515 NP_004281 | 4757762   | ring finger protein 14; androgen receptor associated protein 54                     |
| 516 NP_004291 | 4757714   | acid phosphatase 1 isoform c; acid phosphatase of erythrocyte; red cell             |
| 517 NP_004299 | 4757766   | Rho GTPase activating protein 1; RhoGAP; p50rhoGAP; CDC42 GTPase-activa             |
| 518 NP_004300 | 4757768   | Rho GDP dissociation inhibitor (GDI) alpha                                          |
| 519 NP_004303 | 4757776   | arrestin 3, retinal (X-arrestin); Arrestin 3, retinal                               |
| 520 NP_004306 | 4757786   | N-acylsphingosine amidohydrolase (acid ceramidase) 1; N-acylsphingosine             |
| 521 NP_004321 | 4757856   | BCL2/adenovirus E1B 19kD interacting protein 2; BCL2/adenovirus E1B 19k             |
| 522 NP_004330 | 4757886   | pituitary tumor-transforming protein 1-interacting protein precursor; c             |
| 523 NP_004333 | 4826657   | caldesmon 1 isoform 3; H-CAD; L-CAD                                                 |
| 524 NP_004334 | 4757900   | calreticulin precursor; Sicca syndrome antigen A (autoantigen Ro; calre             |
| 525 NP_004359 | 4758018   | calponin 2; Caloinin 2                                                              |
| 526 NP_004362 | 4758030   | coatomer protein complex, subunit alpha; alpha coat protein; xenin                  |
| 527 NP_004365 | 4758040   | cytochrome c oxidase subunit VIc proprotein; cytochrome c oxidase subun             |
| 528 NP_004374 | 4758078   | c-src tyrosine kinase                                                               |
| 529 NP_004380 | 7656999   | catenin (cadherin-associated protein), alpha 2; Catenin, alpha-2 (cadhe             |
| 530 NP_004386 | 18426915  | drebrin 1 isoform a; drebrin E; drebrin-1; drebrin E2                               |
| 531 NP_004395 | 4758158   | neural precursor cell expressed, developmentally down-regulated 5                   |
| 532 NP_004399 | 4758182   | dynamin 1; dynamin; dynamin1; Dynamain-1                                            |
| 533 NP_004448 | 4758330   | long-chain fatty-acid-Coenzyme A ligase 3; lignoceroyl-CoA synthase                 |
| 534 NP_004451 | 16933540  | fibroblast activation protein, alpha subunit; integral membrane serine              |
| 535 NP_004461 | 17149842  | FK506-binding protein 2 precursor; FK506-binding protein 2 (13kD); pep              |
| 536 NP_004479 | 4758460   | glycoprotein V (platelet)                                                           |
| 537 NP_004482 | 25121940  | glucocorticoid receptor DNA binding factor 1 isoform b                              |
| 538 NP_004484 | 4758504   | hydroxyacyl-Coenzyme A dehydrogenase, type II                                       |
| 539 NP_004508 | 4758606   | integrin-linked kinase                                                              |
| 540 NP_004511 | 4758644   | kinesin heavy chain member 2; Kinesin, heavy chain, 2                               |

| Refseq ID     | gi Number | Protein Name/Description                                                |
|---------------|-----------|-------------------------------------------------------------------------|
| 541 NP_004512 | 4758648   | kinesin family member 5B; kinesin 1 (110-120kD)                         |
| 542 NP_004519 | 4758714   | microsomal glutathione S-transferase 3; microsomal glutathione S-transf |
| 543 NP_004528 | 4758756   | nucleosome assembly protein 1-like 1; HSP22-like protein interacting pr |
| 544 NP_004538 | 6041669   | NADH dehydrogenase (ubiquinone) 1 beta subcomplex, 4, 15kDa; NADH dehyd |
| 545 NP_004540 | 4758784   | NADH dehydrogenase (ubiquinone) 1, subcomplex unknown, 2, 14.5kDa; NADH |
| 546 NP_004542 | 4758788   | NADH dehydrogenase (ubiquinone) Fe-S protein 3, 30kDa (NADH-coenzyme Q  |
| 547 NP_004543 | 4758790   | NADH dehydrogenase (ubiquinone) Fe-S protein 5, 15kDa (NADH-coenzyme Q  |
| 548 NP_004544 | 4758792   | NADH dehydrogenase (ubiquinone) Fe-S protein 6, 13kDa (NADH-coenzyme Q  |
| 549 NP_004559 | 28077085  | serine (or cysteine) proteinase inhibitor, clade B (ovalbumin), member  |
| 550 NP_004570 | 22035600  | mitogen-activated protein kinase kinase kinase 2; Rab8 interact         |
| 551 NP_004571 | 19923264  | RAB27A, member RAS oncogene family                                      |
| 552 NP_004598 | 4759212   | beta-tubulin cofactor A                                                 |
| 553 NP_004613 | 4759270   | translin; recombination hotspot associated factor; recombination hotspo |
| 554 NP_004640 | 5031691   | chromosome 21 open reading frame 33; human HES1 protein, homolog to E.c |
| 555 NP_004648 | 4759082   | serum deprivation response protein; serum deprivation response; phospho |
| 556 NP_004654 | 4758984   | RAB11A, member RAS oncogene family; RAB 11A, member oncogene family     |
| 557 NP_004684 | 4758618   | cytokeratin type II                                                     |
| 558 NP_004691 | 26638653  | potassium voltage-gated channel KQT-like protein 4 isoform a; potassiu  |
| 559 NP_004709 | 18105037  | cytochrome c oxidase subunit VIIa polypeptide 2 like; estrogen recepto  |
| 560 NP_004725 | 4758128   | doublecortin and CaM kinase-like 1; doublecortin-like kinase            |
| 561 NP_004729 | 4759302   | VAMP (vesicle-associated membrane protein)-associated protein B and C;  |
| 562 NP_004733 | 9257195   | BAI1-associated protein 1; WW domain-containing protein 3; atrophin-1 i |
| 563 NP_004748 | 4758266   | small inducible cytokine subfamily E, member 1; endothelial monocyte-ac |
| 564 NP_004757 | 4758032   | coatomer protein complex, subunit beta 2 (beta prime); coatomer binding |
| 565 NP_004772 | 4759300   | vesicle-associated membrane protein 3 (cellubrevin); vesicle-associated |
| 566 NP_004777 | 4759274   | thioredoxin-like, 32kDa; thioredoxin-related 32 kDa protein; thioredoxi |
| 567 NP_004778 | 4759146   | slit homolog 2                                                          |
| 568 NP_004800 | 20149563  | stomatin (EPB72)-like 1; stomatin-like 1; stomatin (EBP72)-like 1       |
| 569 NP_004801 | 4758476   | GRB2-related adaptor protein 2; growth factor receptor-bound protein 2- |
| 570 NP_004808 | 4759342   | tight junction protein 2 (zona occludens 2); Friedreich ataxia region g |
| 571 NP_004823 | 4758484   | glutathione-S-transferase like; glutathione transferase omega           |
| 572 NP_004841 | 4759044   | Rho-associated, coiled-coil containing protein kinase 2                 |
| 573 NP_004850 | 4758012   | clathrin heavy chain; clathrin, heavy polypeptide-like 2                |
| 574 NP_004868 | 4758440   | glia maturation factor, gamma                                           |
| 575 NP_004879 | 4757818   | ATPase, H+ transporting, lysosomal, V1 subunit G isoform 1; vacuolar H( |
| 576 NP_004880 | 4757812   | ATP synthase, H+ transporting, mitochondrial F0 complex, subunit f, iso |
| 577 NP_004883 | 4759086   | vesicle trafficking protein sec22b                                      |
| 578 NP_004896 | 4758638   | peroxiredoxin 6; antioxidant protein 2; non-selenium glutathione peroxi |
| 579 NP_004902 | 4758304   | protein disulfide isomerase related protein (calcium-binding protein, i |
| 580 NP_004915 | 12025678  | actinin, alpha 4                                                        |
| 581 NP_004921 | 4826659   | F-actin capping protein beta subunit; Cap Z                             |
| 582 NP_004964 | 11863152  | jumonji; jumonji (mouse) homolog                                        |
| 583 NP_004976 | 15718761  | c-K-ras2 protein isoform b; Kirsten rat sarcoma-2 viral (v-Ki-ras2) on  |
| 584 NP_004978 | 13518026  | LIM and senescent cell antigen-like domains 1                           |
| 585 NP_004991 | 4826848   | NADH dehydrogenase (ubiquinone) 1 alpha subcomplex, 5; NADH dehydrogena |
| 586 NP_004993 | 6681764   | NADH dehydrogenase (ubiquinone) 1 alpha subcomplex, 9, 39kDa; NADH dehy |
| 587 NP_005001 | 4826864   | neuronal cell adhesion molecule; Bravo                                  |
| 588 NP_005007 | 14141168  | poly(rC)-binding protein 2 isoform a; poly(rC)-binding protein 2; alph  |
| 589 NP_005013 | 4826898   | profilin 1; profilin-1                                                  |
| 590 NP_005019 | 6857820   | phosphatidylinositol-4-phosphate 5-kinase type II alpha; 1-phosphatidyl |
| 591 NP_005092 | 4826774   | interferon, alpha-inducible protein (clone IFI-15K); interferon-stimula |
| 592 NP_005103 | 4827056   | WD repeat-containing protein 1 isoform 2                                |
| 593 NP_005106 | 19913412  | major vault protein                                                     |
| 594 NP_005116 | 4826665   | copper chaperone for superoxide dismutase                               |
| 595 NP_005130 | 4826643   | annexin A3; Annexin III (lipocortin III); annexin III (lipocortin III,  |
| 596 NP_005132 | 11761631  | fibrinogen, beta chain preproprotein                                    |
| 597 NP_005134 | 4826762   | haptoglobin                                                             |
| 598 NP_005142 | 4827050   | ubiquitin specific protease 14                                          |
| 599 NP_005152 | 4885057   | angiotensin II receptor-like 1; angiotensin receptor-like 1             |
| 600 NP_005156 | 4885063   | aldolase C, fructose-bisphosphate; Aldolase C, fructose-bisphosphatase  |

| Refseq ID     | gi Number | Protein Name/Description                                                            |
|---------------|-----------|-------------------------------------------------------------------------------------|
| 601 NP_005164 | 28373103  | sarco/endoplasmic reticulum Ca <sup>2+</sup> -ATPase isoform a; ATPase, Ca(2+)-tra  |
| 602 NP_005165 | 4885079   | ATP synthase, H <sup>+</sup> transporting, mitochondrial F1 complex, gamma polypept |
| 603 NP_005177 | 12408656  | calpain 1, large subunit; calpain, large polypeptide L1; calcium-activ              |
| 604 NP_005198 | 4885153   | v-crk sarcoma virus CT10 oncogene homolog (avian)-like; v-crk avian sar             |
| 605 NP_005204 | 4885165   | cystatin A; stefin A; cystatin AS                                                   |
| 606 NP_005210 | 4885183   | diaphanous 1; deafness, autosomal dominant 1; hDia1                                 |
| 607 NP_005222 | 20357552  | cortactin isoform a; oncogene EMS1                                                  |
| 608 NP_005239 | 4885235   | Gardner-Rasheed feline sarcoma viral (v-fgr) oncogene homolog; Gardner-             |
| 609 NP_005252 | 4885263   | GTP binding protein overexpressed in skeletal muscle; GTP-binding prote             |
| 610 NP_005262 | 4885281   | glutamate dehydrogenase 1                                                           |
| 611 NP_005263 | 20330805  | guanine nucleotide binding protein, alpha transducing activity polypep              |
| 612 NP_005264 | 20357529  | guanine nucleotide-binding protein, beta-2 subunit; G protein, beta-2               |
| 613 NP_005265 | 4885287   | guanine nucleotide binding protein (G protein), gamma 5                             |
| 614 NP_005304 | 21361657  | glucose regulated protein, 58kDa; glucose regulated protein, 58kD                   |
| 615 NP_005318 | 4885387   | L-3-hydroxyacyl-Coenzyme A dehydrogenase, short chain; L-3-hydroxyacyl-             |
| 616 NP_005326 | 4885405   | hematopoietic cell-specific Lyn substrate 1                                         |
| 617 NP_005330 | 4885417   | huntingtin interacting protein 2; ubiquitin-conjugating enzyme E2-25 KD             |
| 618 NP_005331 | 4885413   | histidine triad nucleotide binding protein 1; Histidine triad nucleotid             |
| 619 NP_005334 | 4885425   | v-Ha-ras Harvey rat sarcoma viral oncogene homolog; H-RasIDX                        |
| 620 NP_005336 | 5123454   | heat shock 70kDa protein 1A; heat shock 70kD protein 1A; heat shock-ind             |
| 621 NP_005338 | 16507237  | heat shock 70kDa protein 5 (glucose-regulated protein, 78kDa); BiP; he              |
| 622 NP_005339 | 13129150  | heat shock 90kDa protein 1, alpha; heat shock 90kD protein 1, alpha                 |
| 623 NP_005347 | 20428652  | lymphocyte-specific protein tyrosine kinase; oncogene LCK; membrane as              |
| 624 NP_005361 | 16933567  | mel transforming oncogene; ras-associated protein RAB8                              |
| 625 NP_005380 | 4885539   | protein-L-isoaspartate (D-aspartate) O-methyltransferase                            |
| 626 NP_005393 | 4885569   | v-ral simian leukemia viral oncogene homolog A (ras related); RAS-like              |
| 627 NP_005397 | 4885583   | Rho-associated, coiled-coil containing protein kinase 1; p160ROCK; p160             |
| 628 NP_005408 | 4885609   | v-src sarcoma (Schmidt-Ruppin A-2) viral oncogene homolog; Protooncogen             |
| 629 NP_005427 | 4885173   | DNA segment on chromosome 10 (unique) 170; DNA segment, single copy, pr             |
| 630 NP_005442 | 11496885  | enigma protein; LIM domain protein                                                  |
| 631 NP_005454 | 4885423   | heterogeneous nuclear ribonucleoprotein D-like; A+U-rich element RNA bi             |
| 632 NP_005498 | 5031635   | cofilin 1 (non-muscle)                                                              |
| 633 NP_005505 | 17986001  | major histocompatibility complex, class I, B; HLA class I histocompati              |
| 634 NP_005518 | 27436929  | heat shock 70kDa protein 1-like; heat shock 70kD protein-like 1                     |
| 635 NP_005545 | 5031839   | keratin 6A; Keratin-6A; keratin, epidermal type II, K6A; cytokeratin 6A             |
| 636 NP_005548 | 24430192  | keratin 16; keratin, type I cytoskeletal 16; cytokeratin 16                         |
| 637 NP_005552 | 7669501   | lysosomal-associated membrane protein 1                                             |
| 638 NP_005556 | 5031855   | lymphocyte cytosolic protein 2; SH2 domain-containing leukocyte protein             |
| 639 NP_005557 | 5031857   | lactate dehydrogenase A                                                             |
| 640 NP_005585 | 5031931   | nascent-polypeptide-associated complex alpha polypeptide                            |
| 641 NP_005591 | 5031947   | nitrilase 1                                                                         |
| 642 NP_005596 | 21361290  | protein phosphatase 3 (formerly 2B), catalytic subunit, gamma isoform               |
| 643 NP_005597 | 21914881  | legumain; protease, cysteine, 1 (legumain)                                          |
| 644 NP_005600 | 5032009   | glycogen phosphorylase; phosphorylase, glycogen, muscle; myophosphoryla             |
| 645 NP_005605 | 5032041   | Ras homolog enriched in brain 2                                                     |
| 646 NP_005629 | 5032137   | synaptobrevin-like 1                                                                |
| 647 NP_005639 | 5032161   | elongin C; transcription elongation factor B (SIII), polypeptide 1 (15k             |
| 648 NP_005653 | 25188179  | voltage-dependent anion channel 3                                                   |
| 649 NP_005681 | 5031677   | dynamin 1-like protein isoform 3; dynamin-like protein                              |
| 650 NP_005688 | 5730031   | secretory carrier membrane protein 2                                                |
| 651 NP_005691 | 18491024  | dipeptidylpeptidase III isoform 1; dipeptidylpeptidase III                          |
| 652 NP_005701 | 5031957   | polyglutamine binding protein 1; nuclear protein containing WW domain 3             |
| 653 NP_005708 | 5031593   | actin related protein 2/3 complex subunit 5; Arp2/3 protein complex sub             |
| 654 NP_005709 | 5031595   | actin related protein 2/3 complex subunit 4; Arp2/3 protein complex sub             |
| 655 NP_005710 | 5031597   | actin related protein 2/3 complex subunit 3; ARP2/3 protein complex sub             |
| 656 NP_005711 | 5031601   | actin related protein 2/3 complex subunit 1B; ARP2/3 protein complex su             |
| 657 NP_005712 | 5031573   | ARP3 actin-related protein 3 homolog; ARP3 (actin-related protein 3, ye             |
| 658 NP_005713 | 5031571   | actin-related protein 2; ARP2 (actin-related protein 2, yeast) homolog              |
| 659 NP_005720 | 5031987   | peptidylprolyl isomerase F (cyclophilin F)                                          |
| 660 NP_005722 | 5031599   | actin related protein 2/3 complex subunit 2; ARP2/3 protein complex sub             |

| Refseq ID     | gi Number | Protein Name/Description                                                |
|---------------|-----------|-------------------------------------------------------------------------|
| 661 NP_005727 | 5031569   | ARP1 actin-related protein 1 homolog A, centractin alpha; ARP1 (actin-r |
| 662 NP_005733 | 5031973   | protein disulfide isomerase-related protein                             |
| 663 NP_005742 | 22538387  | A kinase anchor protein 9 isoform 2; yotiao; A-kinase anchoring protei  |
| 664 NP_005787 | 5031985   | nuclear transport factor 2; placental protein 15                        |
| 665 NP_005800 | 5902726   | peroxiredoxin 2; thioredoxin-dependent peroxide reductase 1 (thiol-spec |
| 666 NP_005808 | 20127486  | cargo selection protein (mannose 6 phosphate receptor binding pr        |
| 667 NP_005816 | 20149570  | RAS guanyl releasing protein 2 isoform 1; calcium and diacylglycerol-r  |
| 668 NP_005822 | 5031937   | nuclear domain 10 protein                                               |
| 669 NP_005850 | 5032007   | purine-rich element binding protein A; purine-rich single-stranded DNA- |
| 670 NP_005859 | 5031611   | BET1 homolog; Golgi vesicular membrane trafficking protein p18; Bet1p h |
| 671 NP_005882 | 5174389   | acetyl-Coenzyme A acetyltransferase 2; acetoacetyl Coenzyme A thiolase  |
| 672 NP_005886 | 5174441   | Golgi autoantigen, golgin subfamily a, 3; Golgin-160; male enhanced ant |
| 673 NP_005887 | 28178825  | isocitrate dehydrogenase 1 (NADP+), soluble; oxalosuccinate decarboxyl  |
| 674 NP_005900 | 5174525   | microtubule-associated protein 1B isoform 1                             |
| 675 NP_005908 | 5174539   | cytosolic malate dehydrogenase; soluble malate dehydrogenase            |
| 676 NP_005909 | 21735621  | mitochondrial malate dehydrogenase precursor                            |
| 677 NP_005917 | 5174553   | microfibrillar-associated protein 1                                     |
| 678 NP_005947 | 13699868  | methylenetetrahydrofolate dehydrogenase (NADP+ dependent), methenyltet  |
| 679 NP_005956 | 16950601  | myosin light chain kinase isoform 6; myosin light chain kinase          |
| 680 NP_005960 | 5174613   | nucleosome assembly protein 1-like 4; nucleosome assembly protein 2     |
| 681 NP_005989 | 5174727   | chaperonin containing TCP1, subunit 3 (gamma); TCP1 (t-complex-1) ring  |
| 682 NP_005990 | 5174731   | translin-associated factor X; translin-like protein                     |
| 683 NP_005991 | 17921989  | tubulin, alpha 1; testis-specific alpha tubulin; tubulin alpha-1 chain  |
| 684 NP_005995 | 5174745   | ubiquinol-cytochrome c reductase hinge protein                          |
| 685 NP_006000 | 17986283  | tubulin, alpha 3; tubulin, alpha, brain-specific; hum-a-tub1; hum-a-tu  |
| 686 NP_006001 | 5174393   | arginine-rich, mutated in early stage tumors; arginine-rich protein     |
| 687 NP_006026 | 16357474  | CDC42-binding protein kinase beta; CDC42-binding protein kinase beta (  |
| 688 NP_006077 | 5174737   | tubulin, beta, 4                                                        |
| 689 NP_006078 | 21361322  | tubulin, beta, 5                                                        |
| 690 NP_006085 | 5174427   | deleted in liver cancer 1; ortholog of mouse Arhgap7; START domain cont |
| 691 NP_006088 | 29568111  | myosin, light polypeptide 9, regulatory; myosin regulatory light chain  |
| 692 NP_006089 | 5174447   | guanine nucleotide binding protein (G protein), beta polypeptide 2-like |
| 693 NP_006091 | 5174697   | alpha2,3-sialyltransferase VI                                           |
| 694 NP_006112 | 17318569  | keratin 1; Keratin-1; cytokeratin 1; hair alpha protein                 |
| 695 NP_006126 | 5453597   | F-actin capping protein alpha-1 subunit; Cap Z                          |
| 696 NP_006127 | 5453599   | capping protein (actin filament) muscle Z-line, alpha 2; F-actin cappin |
| 697 NP_006139 | 5453710   | LIM and SH3 protein 1; Lasp-1                                           |
| 698 NP_006147 | 5453760   | neural precursor cell expressed, developmentally down-regulated 8       |
| 699 NP_006187 | 5453854   | poly(rC) binding protein 1; heterogenous nuclear ribonucleoprotein X; p |
| 700 NP_006207 | 24307907  | plasminogen activator inhibitor type 1, member 2; protease inhibitor 7  |
| 701 NP_006209 | 5453892   | phosphoinositide-3-kinase, catalytic, alpha polypeptide; phosphatidylin |
| 702 NP_006212 | 5453898   | protein (peptidyl-prolyl cis/trans isomerase) NIMA-interacting 1; dod;  |
| 703 NP_006214 | 5453902   | protein (peptidyl-prolyl cis/trans isomerase) NIMA-interacting, 4 (parv |
| 704 NP_006245 | 5453970   | protein kinase C, delta                                                 |
| 705 NP_006247 | 5453974   | protein kinase C-like 2                                                 |
| 706 NP_006249 | 10835242  | protein kinase, cGMP-dependent, type I; Protein kinase, cGMP-dependent  |
| 707 NP_006254 | 5453990   | proteasome (prosome, macropain) activator subunit 1 (PA28 alpha); Prote |
| 708 NP_006261 | 5454028   | related RAS viral (r-ras) oncogene homolog; Oncogene RRAS               |
| 709 NP_006271 | 5454090   | signal sequence receptor, delta; translocon-associated protein delta    |
| 710 NP_006280 | 16753233  | talin 1                                                                 |
| 711 NP_006285 | 5454152   | ubiquinol-cytochrome c reductase binding protein                        |
| 712 NP_006300 | 5453726   | leucine rich repeat (in FLII) interacting protein 2                     |
| 713 NP_006301 | 15451907  | aminopeptidase puromycin sensitive; puromycin-sensitive aminopeptidase  |
| 714 NP_006311 | 5453916   | progesterone membrane binding protein                                   |
| 715 NP_006316 | 5453555   | ras-related nuclear protein                                             |
| 716 NP_006321 | 5453722   | lysophospholipase I; lysophospholipase 1; lysophospholipid-specific lys |
| 717 NP_006347 | 5453559   | ATP synthase, H+ transporting, mitochondrial F0 complex, subunit d; ATP |
| 718 NP_006358 | 5453595   | adenylyl cyclase-associated protein                                     |
| 719 NP_006359 | 22219462  | cAMP responsive element binding protein 3; luman; cyclic AMP response   |
| 720 NP_006365 | 21361358  | serine/threonine kinase 25 (STE20 homolog, yeast); sterile 20 (oxidant  |

| Refseq ID     | gi Number | Protein Name/Description                                                 |
|---------------|-----------|--------------------------------------------------------------------------|
| 721 NP_006368 | 5454148   | UNC13 (C. elegans)-like; homolog of rat Munc13 (diacylglycerol-binding)  |
| 722 NP_006380 | 5453832   | oxygen regulated protein precursor; oxygen regulated protein (150kD)     |
| 723 NP_006382 | 5453998   | importin 7; RAN-binding protein 7                                        |
| 724 NP_006391 | 5453629   | dynactin 2; dynactin complex 50 kD subunit; dynamitin; 50 kD dynein-ass  |
| 725 NP_006393 | 5454170   | hepatitis B virus x-interacting protein; hepatitis B virus x-interactin  |
| 726 NP_006397 | 5453549   | thioredoxin peroxidase; thioredoxin peroxidase (antioxidant enzyme)      |
| 727 NP_006398 | 5453704   | cytoskeleton related vitamin A responsive protein; glutamate transporte  |
| 728 NP_006420 | 5453607   | chaperonin containing TCP1, subunit 7 (eta); chaperonin containing t-co  |
| 729 NP_006421 | 5453605   | chaperonin containing TCP1, subunit 4 (delta); chaperonin containing t-  |
| 730 NP_006422 | 5453603   | chaperonin containing TCP1, subunit 2 (beta); chaperonin containing t-c  |
| 731 NP_006435 | 5453591   | SMC2 structural maintenance of chromosomes 2-like 1; structural mainten  |
| 732 NP_006448 | 5453714   | LIM protein (similar to rat protein kinase C-binding enigma)             |
| 733 NP_006454 | 5453545   | associated molecule with the SH3 domain of STAM                          |
| 734 NP_006462 | 5453740   | myosin regulatory light chain MRCL3; myosin, light polypeptide, regulat  |
| 735 NP_006467 | 29568101  | ATP synthase, H+ transporting, mitochondrial F0 complex, subunit g; AT   |
| 736 NP_006494 | 5729991   | proteasome 26S ATPase subunit 4 isoform 1; protease 26S subunit 6; Tat-  |
| 737 NP_006504 | 16306548  | seryl-tRNA synthetase; serine-tRNA ligase                                |
| 738 NP_006514 | 5730118   | X-prolyl aminopeptidase (aminopeptidase P) 1, soluble; X-prolyl aminope  |
| 739 NP_006547 | 5729980   | phosphomevalonate kinase                                                 |
| 740 NP_006557 | 5729808   | adhesion glycoprotein; platelet and T cell activation antigen 1; DNAX a  |
| 741 NP_006561 | 5729999   | Ras-related GTP-binding protein RAGA                                     |
| 742 NP_006563 | 24111250  | guanine nucleotide binding protein (G protein), alpha 13                 |
| 743 NP_006576 | 6005727   | chaperonin containing TCP1, subunit 8 (theta); T-complex protein 1, the  |
| 744 NP_006588 | 5729877   | heat shock 70kDa protein 8 isoform 1; heat shock cognate protein, 71-kD  |
| 745 NP_006592 | 23308579  | inactive progesterone receptor, 23 kD; likely ortholog of mouse telome   |
| 746 NP_006624 | 5729887   | IQ motif containing GTPase activating protein 2                          |
| 747 NP_006656 | 5729873   | heparanase; heparanase-1                                                 |
| 748 NP_006658 | 5729875   | progesterone receptor membrane component 1; progesterone binding protei  |
| 749 NP_006694 | 5729804   | nudix (nucleoside diphosphate linked moiety X)-type motif 3; diphosphoi  |
| 750 NP_006699 | 5729842   | glyoxalase I; lactoyl glutathione lyase; lactoylglutathione lyase        |
| 751 NP_006701 | 5729779   | COP9 homolog                                                             |
| 752 NP_006717 | 16904381  | LPS-responsive vesicle trafficking, beach and anchor containing; vesic   |
| 753 NP_006720 | 5803003   | diaphanous 2 isoform 156                                                 |
| 754 NP_006746 | 5803187   | transaldolase 1; dihydroxyacetone transferase; glycerone transferase     |
| 755 NP_006750 | 13027638  | UDP-glucose pyrophosphorylase 2; UTP-glucose-1-phosphate uridylyltransfe |
| 756 NP_006752 | 5803225   | tyrosine 3/tryptophan 5 -monooxygenase activation protein, epsilon poly  |
| 757 NP_006780 | 5802978   | apolipoprotein B mRNA editing enzyme, catalytic polypeptide-like 2; apo  |
| 758 NP_006784 | 5802974   | peroxiredoxin 3; antioxidant protein 1; thioredoxin-dependent peroxide   |
| 759 NP_006786 | 5803009   | EH-domain containing 1; homolog of Drosophila past; EH domain containi   |
| 760 NP_006793 | 5803167   | splicing factor 3a, subunit 3, 60kDa; pre-mRNA splicing factor SF3a (60  |
| 761 NP_006796 | 5803036   | heterogeneous nuclear ribonucleoprotein A0; hnRNA binding protein        |
| 762 NP_006801 | 5803121   | for protein disulfide isomerase-related                                  |
| 763 NP_006806 | 5803149   | coated vesicle membrane protein                                          |
| 764 NP_006808 | 5803013   | endoplasmic reticulum protein 29 precursor; endoplasmic reticulum lumen  |
| 765 NP_006810 | 5803181   | stress-induced-phosphoprotein 1 (Hsp70/Hsp90-organizing protein)         |
| 766 NP_006817 | 5803227   | tyrosine 3/tryptophan 5 -monooxygenase activation protein, theta polype  |
| 767 NP_006818 | 5803201   | transmembrane trafficking protein                                        |
| 768 NP_006819 | 24307917  | RNA helicase family                                                      |
| 769 NP_006821 | 5803217   | ubiquinol-cytochrome c reductase (6.4kD) subunit                         |
| 770 NP_006825 | 5803133   | RAB32, member RAS oncogene family                                        |
| 771 NP_006830 | 5803115   | inner membrane protein, mitochondrial (mitofilin); motor protein         |
| 772 NP_006843 | 11140819  | tousled-like kinase 2; serine/threonine kinase; tousled-like kinase      |
| 773 NP_006852 | 5803135   | RAB35, member RAS oncogene family; ras-related protein rab-1c (GTP-bind  |
| 774 NP_006861 | 5802966   | destrin (actin depolymerizing factor); destrin                           |
| 775 NP_006868 | 11321611  | guanosine monophosphate reductase; guanine monophosphate reductase       |
| 776 NP_008839 | 9845511   | ras-related C3 botulinum toxin substrate 1 isoform Rac1; rho family, sm  |
| 777 NP_008862 | 5902090   | solute carrier family 2 (facilitated glucose transporter), member 3; GL  |
| 778 NP_008868 | 21361388  | SMT3 suppressor of mif two 3 homolog 2; SMT3 (suppressor of mif two 3,   |
| 779 NP_008878 | 5902124   | signal recognition particle 72kDa; signal recognition particle 72kD      |
| 780 NP_008880 | 5902128   | syntaxin binding protein 2; Hunc18b                                      |

| Refseq ID     | gi Number | Protein Name/Description                                                            |
|---------------|-----------|-------------------------------------------------------------------------------------|
| 781 NP_008921 | 11386183  | WAS protein family, member 2; suppressor of cyclic-AMP receptor (WASP-              |
| 782 NP_008939 | 5902016   | reticulon 4; neuroendocrine-specific protein C like (foocen)                        |
| 783 NP_008977 | 5901944   | elastin microfibril interface located protein; TNF? elastin microfibril             |
| 784 NP_008994 | 5902154   | vascular Rab-GAP/TBC-containing                                                     |
| 785 NP_008996 | 5901922   | CDC37 homolog                                                                       |
| 786 NP_009005 | 5902134   | coronin, actin binding protein, 1A; coronin, actin-binding, 1A; coronin             |
| 787 NP_009031 | 6005717   | ATP synthase, H <sup>+</sup> transporting, mitochondrial F0 complex, subunit e; ATP |
| 788 NP_009039 | 6005890   | elongin B; transcription elongation factor B (SIII), polypeptide 2 (18k             |
| 789 NP_009043 | 6005902   | thrombospondin 3                                                                    |
| 790 NP_009057 | 6005942   | valosin-containing protein; yeast Cdc48p homolog; transitional endoplas             |
| 791 NP_009098 | 6005978   | zinc finger protein 258                                                             |
| 792 NP_009126 | 6005848   | polymerase (DNA directed) iota; RAD30 (S. cerevisiae) homolog B; polyme             |
| 793 NP_009148 | 20127517  | programmed cell death 10; apoptosis-related protein 15                              |
| 794 NP_009160 | 6005826   | protein kinase C and casein kinase substrate in neurons 2; pacsin 2                 |
| 795 NP_009165 | 6005745   | dynactin 3 isoform 1; dynactin light chain                                          |
| 796 NP_009167 | 6005731   | calcium binding protein P22; SLC9A1 binding protein; calcineurin homolo             |
| 797 NP_009168 | 21361374  | SP140 nuclear body protein; nuclear body protein Sp140                              |
| 798 NP_009175 | 6005802   | proline rich 4 (lacrimal); lacrimal proline rich protein                            |
| 799 NP_009177 | 21359896  | kelch-like 2, Mayven; mayven; kelch (Drosophila)-like 2 (Mayven)                    |
| 800 NP_009191 | 9966764   | lysophospholipase II; acyl-protein thioesterase                                     |
| 801 NP_009193 | 6005749   | RNA-binding protein regulatory subunit; oncogene DJ1                                |
| 802 NP_009194 | 6005735   | coatomer protein complex, subunit epsilon                                           |
| 803 NP_009200 | 6005886   | syntaxin binding protein 3; syntaxin 4 binding protein                              |
| 804 NP_009204 | 6005854   | repressor of estrogen receptor activity; B-cell associated protein                  |
| 805 NP_009214 | 6005786   | monoglyceride lipase; lysophospholipase-like                                        |
| 806 NP_009215 | 6005846   | PTK9L protein tyrosine kinase 9-like (A6-related protein); protein tyro             |
| 807 NP_009216 | 6005768   | GABA(A) receptor-associated protein-like 2; ganglioside expression fact             |
| 808 NP_009225 | 6552299   | breast cancer 1, early onset; breast-ovarian cancer, included                       |
| 809 NP_031377 | 6681259   | multimerin                                                                          |
| 810 NP_031379 | 6680033   | guanine nucleotide binding protein (G protein) alpha 12                             |
| 811 NP_031381 | 20149594  | heat shock 90kDa protein 1, beta; heat shock 90kD protein 1, beta; Hea              |
| 812 NP_031387 | 6679056   | nidogen 2 (osteonidogen); nidogen 2                                                 |
| 813 NP_031394 | 12545410  | RAS p21 protein activator 3; GTPase activating protein III; Ins(1,3,4,              |
| 814 NP_036205 | 24307939  | chaperonin containing TCP1, subunit 5 (epsilon)                                     |
| 815 NP_036208 | 6912322   | crumbs homolog 1                                                                    |
| 816 NP_036218 | 6912398   | general transcription factor IIIC, polypeptide 3, 102kDa; general trans             |
| 817 NP_036220 | 6912586   | 6-phosphogluconolactonase                                                           |
| 818 NP_036222 | 15011904  | microfilament and actin filament cross-linker protein isoform a; 620 k              |
| 819 NP_036226 | 6912238   | peroxiredoxin 5; antioxidant enzyme B166                                            |
| 820 NP_036227 | 6912240   | adaptor-related protein complex 3, mu 1 subunit; mu-adaptin 3A; AP-3 ad             |
| 821 NP_036256 | 6912304   | cysteine and histidine-rich domain (CHORD)-containing, zinc binding pro             |
| 822 NP_036266 | 6912324   | leiomodulin 1 (smooth muscle); thyroid and eye muscle autoantigen D1 (64k           |
| 823 NP_036277 | 6912340   | deoxythymidylate kinase (thymidylate kinase); thymidylate kinase                    |
| 824 NP_036335 | 6912396   | glyoxylate reductase/hydroxypyruvate reductase                                      |
| 825 NP_036357 | 6912540   | nucleotide binding protein 2 (MinD homolog, E. coli); nucleotide bindin             |
| 826 NP_036372 | 6912662   | sirtuin 4; sir2-like 4; sirtuin type 4; sirtuin silent mating type info             |
| 827 NP_036382 | 21361416  | related RAS viral (r-ras) oncogene homolog 2; oncogene TC21                         |
| 828 NP_036457 | 6912494   | microtubule-associated protein, RP/EB family, member 1; ADENOMATOUS POL             |
| 829 NP_036458 | 10800412  | microtubule-associated protein, RP/EB family, member 3; APC binding pr              |
| 830 NP_036463 | 6912516   | methionine sulfoxide reductase A; peptide met (O) reductase                         |
| 831 NP_036473 | 6912532   | G protein-binding protein CRFG; GTP-binding protein                                 |
| 832 NP_036475 | 6912536   | nicotinamide nucleotide transhydrogenase                                            |
| 833 NP_036515 | 21361409  | osteoclast stimulating factor 1                                                     |
| 834 NP_036526 | 12408675  | prefoldin 2                                                                         |
| 835 NP_036557 | 6912638   | ras suppressor protein 1                                                            |
| 836 NP_036592 | 6912714   | translocase of inner mitochondrial membrane 9 homolog; translocase of i             |
| 837 NP_036610 | 24430132  | WW domain binding protein 2                                                         |
| 838 NP_036611 | 21464101  | tyrosine 3-monooxygenase/tryptophan 5-monooxygenase activation protein              |
| 839 NP_037364 | 7019485   | programmed cell death 6; apoptosis-linked gene 2                                    |
| 840 NP_037373 | 7019375   | formin homology 2 domain containing 1; FH1/FH2 domain-containing protei             |

| Refseq ID     | gi Number | Protein Name/Description                                                |
|---------------|-----------|-------------------------------------------------------------------------|
| 841 NP_037391 | 10047092  | neuronal protein                                                        |
| 842 NP_037409 | 21361397  | Rac GTPase activating protein 1; GTPase activating protein              |
| 843 NP_037459 | 20127528  | parvin, beta; CGI-56 protein; beta-parvin                               |
| 844 NP_037473 | 24431969  | hypothetical protein PTD004; homologous yeast-44.2 protein              |
| 845 NP_037478 | 23111030  | sorting nexin 12                                                        |
| 846 NP_037481 | 7019545   | secreted protein of unknown function                                    |
| 847 NP_037506 | 22027538  | programmed cell death 6 interacting protein; ALG-2 interacting protein  |
| 848 NP_038464 | 7305303   | NCK-associated protein 1                                                |
| 849 NP_038470 | 7305503   | stomatin (EPB72)-like 2; stomatin-like protein 2; stomatin-like 2       |
| 850 NP_038479 | 7305053   | myoferlin isoform a; fer-1-like 3                                       |
| 851 NP_039234 | 7330335   | chloride intracellular channel 4; chloride intracellular channel 4 like |
| 852 NP_039268 | 7524354   | dimethylarginine dimethylaminohydrolase 2; dimethylarginine dimethylami |
| 853 NP_054702 | 7770075   | tachykinin 1 isoform alpha precursor; neurokinin A; neurokinin alpha; t |
| 854 NP_054733 | 24307975  | U5 snRNP-specific protein, 200-KD                                       |
| 855 NP_054735 | 7662338   | suppressor of actin 1                                                   |
| 856 NP_054736 | 7661728   | HSPC003 protein                                                         |
| 857 NP_054738 | 7661732   | HSPC009 protein                                                         |
| 858 NP_054752 | 13378141  | DKFZP586A0522 protein                                                   |
| 859 NP_054756 | 7662518   | NTT5 protein                                                            |
| 860 NP_054775 | 7661620   | DKFZP564K247 protein                                                    |
| 861 NP_054778 | 7662651   | RGC32 protein                                                           |
| 862 NP_054779 | 7662502   | MCT-1 protein                                                           |
| 863 NP_054782 | 21361670  | src homology 3 domain-containing protein HIP-55; HIP-55 protein         |
| 864 NP_054891 | 24475861  | phosphohistidine phosphatase; sex-regulated protein janus-a             |
| 865 NP_054900 | 7661818   | HSPC159 protein                                                         |
| 866 NP_055018 | 19913414  | adaptor-related protein complex 2, alpha 1 subunit isoform 1; adaptin,  |
| 867 NP_055040 | 21361399  | protein phosphatase 2 (formerly 2A), regulatory subunit A (PR 65), alp  |
| 868 NP_055067 | 7657585   | solute carrier family 25 (mitochondrial carrier; ornithine transporter) |
| 869 NP_055070 | 7657176   | transmembrane protein 4                                                 |
| 870 NP_055083 | 10346135  | microtubule-associated protein, RP/EB family, member 2; T-cell activat  |
| 871 NP_055093 | 7656894   | heat shock protein (hsp110 family)                                      |
| 872 NP_055140 | 7656991   | coronin, actin binding protein, 1C; coronin, actin-binding protein, 1C; |
| 873 NP_055165 | 7657124   | TNF-induced protein                                                     |
| 874 NP_055182 | 21361427  | hypothetical protein, estradiol-induced                                 |
| 875 NP_055184 | 18375655  | protein tyrosine phosphatase, non-receptor type 18; brain-derived phos  |
| 876 NP_055191 | 24307955  | p53 inducible protein                                                   |
| 877 NP_055205 | 7657431   | EBNA-2 co-activator (100kD)                                             |
| 878 NP_055210 | 7657007   | dual adaptor of phosphotyrosine and 3-phosphoinositides                 |
| 879 NP_055217 | 7657486   | low molecular mass ubiquinone-binding protein                           |
| 880 NP_055227 | 7656952   | calcyclin binding protein                                               |
| 881 NP_055243 | 10092691  | tight junction protein 3 (zona occludens 3)                             |
| 882 NP_055277 | 7657313   | Lsm1 protein                                                            |
| 883 NP_055309 | 21702742  | trinucleotide repeat containing 6; EDIE; GW182 autoantigen              |
| 884 NP_055323 | 22907039  | apolipoprotein B mRNA editing enzyme, catalytic polypeptide-like 3C     |
| 885 NP_055362 | 7657649   | tropomodulin 3 (ubiquitous)                                             |
| 886 NP_055363 | 7657647   | tropomodulin 2 (neuronal)                                               |
| 887 NP_055378 | 7657548   | spondyloepiphyseal dysplasia, late; sedlin                              |
| 888 NP_055415 | 7657056   | EH-domain containing 3; EH domain containing 3                          |
| 889 NP_055419 | 11993943  | Tax interaction protein 1                                               |
| 890 NP_055423 | 24307969  | cytoplasmic FMR1 interacting protein 1; selective hybridizing clone (m  |
| 891 NP_055425 | 21361456  | alpha glucosidase II alpha subunit; likely ortholog of mouse G2an alph  |
| 892 NP_055517 | 7662096   | KIAA0408 gene product                                                   |
| 893 NP_055545 | 7661948   | KIAA0152 gene product                                                   |
| 894 NP_055644 | 7662318   | Prp5-like DEAD-box protein                                              |
| 895 NP_055793 | 18379346  | VPS10 domain receptor protein SORCS 3                                   |
| 896 NP_055814 | 7661922   | RAB21, member RAS oncogene family                                       |
| 897 NP_055864 | 13027380  | amyotrophic lateral sclerosis 2 (juvenile) chromosome region, candidat  |
| 898 NP_055874 | 22035665  | talin 2                                                                 |
| 899 NP_055944 | 21361478  | septin 6 isoform B; septin 2                                            |
| 900 NP_055987 | 28872861  | HBxAg transactivated protein 2                                          |

| Refseq ID | gi Number | Protein Name/Description                                                        |
|-----------|-----------|---------------------------------------------------------------------------------|
| 901       | NP_056015 | 22094121 KIAA0648 protein                                                       |
| 902       | NP_056034 | 24308035 KIAA1067 protein                                                       |
| 903       | NP_056057 | 16975484 centaurin delta 2 isoform b; ARF-GAP, RHO-GAP, ankyrin repeat, and ple |
| 904       | NP_056078 | 19745148 rabconnectin-3                                                         |
| 905       | NP_056107 | 14149680 KIAA0747 protein                                                       |
| 906       | NP_056202 | 7661624 preimplantation protein 3; likely ortholog of preimplantation protein 3 |
| 907       | NP_056230 | 7661602 DKFZP564B167 protein                                                    |
| 908       | NP_056284 | 22267436 DKFZp564D177 protein                                                   |
| 909       | NP_056286 | 21361470 DKFZP566O1646 protein                                                  |
| 910       | NP_056348 | 20149621 DKFZP586B1621 protein                                                  |
| 911       | NP_056461 | 7661678 RAP1B, member of RAS oncogene family; K-REV; RAS-related protein RAP1B  |
| 912       | NP_056505 | 24308123 serine/threonine kinase 36 (fused homolog, Drosophila); serine/threoni |
| 913       | NP_057001 | 7705704 glutathione S-transferase subunit 13 homolog                            |
| 914       | NP_057005 | 7706244 divalent cation tolerant protein CUTA                                   |
| 915       | NP_057049 | 21361822 cell death-regulatory protein GRIM19; CGI-39 protein                   |
| 916       | NP_057070 | 27764873 cytokine receptor-like factor 3; cytokine receptor-like molecule 9; cy |
| 917       | NP_057071 | 20336761 heme binding protein 1                                                 |
| 918       | NP_057086 | 7705767 CGI-49 protein                                                          |
| 919       | NP_057095 | 7705777 CGI-63 protein                                                          |
| 920       | NP_057105 | 7706312 non-canonical ubiquitin conjugating enzyme 1                            |
| 921       | NP_057107 | 7706314 CGI-77 protein                                                          |
| 922       | NP_057110 | 20070272 androgen-regulated short-chain dehydrogenase/reductase 1; prostate sho |
| 923       | NP_057132 | 7705614 CGI-111 protein                                                         |
| 924       | NP_057152 | 7705632 CGI-135 protein                                                         |
| 925       | NP_057153 | 27363461 mitochondria-associated GM-CSF signaling molecule                      |
| 926       | NP_057158 | 7705638 CGI-143 protein                                                         |
| 927       | NP_057161 | 7706351 CGI-147 protein                                                         |
| 928       | NP_057181 | 7705819 HSPC039 protein                                                         |
| 929       | NP_057187 | 7705827 GTP-binding protein Sara                                                |
| 930       | NP_057190 | 7706371 vesicle transport-related protein                                       |
| 931       | NP_057215 | 7705849 ras-related GTP-binding protein RAB10; ras-related GTP-binding protein  |
| 932       | NP_057226 | 7705855 steroid dehydrogenase homolog; likely ortholog of mouse Kik1 steroid de |
| 933       | NP_057227 | 20149635 p47 protein                                                            |
| 934       | NP_057271 | 7705296 bridging integrator 2; bridging integrator-2; breast cancer associated  |
| 935       | NP_057293 | 7706429 unknown                                                                 |
| 936       | NP_057366 | 19923437 adenylate kinase 3 alpha like                                          |
| 937       | NP_057376 | 7706485 tumor necrosis factor type 1 receptor associated protein                |
| 938       | NP_057390 | 7706495 DnaJ (Hsp40) homolog, subfamily B, member 11; ER-associated DNAJ; ER-as |
| 939       | NP_057392 | 7706497 UMP-CMP kinase                                                          |
| 940       | NP_057406 | 19923483 GTPase Rab14                                                           |
| 941       | NP_057447 | 19923457 glycoprotein VI (platelet); platelet glycoprotein VI                   |
| 942       | NP_057454 | 7705963 RAB9-like protein                                                       |
| 943       | NP_057526 | 20149637 type 1 tumor necrosis factor receptor shedding aminopeptidase regulato |
| 944       | NP_057535 | 7705369 coatomer protein complex, subunit beta; beta coat protein               |
| 945       | NP_057537 | 7705266 SH3 protein interacting with Nck, 90 kDa; SH3 protein; SH3 protein inte |
| 946       | NP_057546 | 7705501 hypothetical protein HSPC194                                            |
| 947       | NP_057569 | 21361741 hypothetical protein HSPC228; My012 protein                            |
| 948       | NP_057614 | 7706563 RAB-8b protein                                                          |
| 949       | NP_057661 | 7706675 RAB6B, member RAS oncogene family; small GTPase RAB6B                   |
| 950       | NP_057701 | 7705300 hypothetical protein BM-002                                             |
| 951       | NP_057736 | 11072091 Crn, crooked neck-like 1; CGI-201 protein; crooked neck protein (crn); |
| 952       | NP_058625 | 8393147 chloride intracellular channel 5                                        |
| 953       | NP_058642 | 8393638 F11 receptor isoform a precursor; platelet F11 receptor; platelet adhes |
| 954       | NP_059118 | 8393159 calmodulin-like skin protein                                            |
| 955       | NP_059139 | 8393120 polymerase (DNA directed), epsilon 3 (p17 subunit); histone fold protei |
| 956       | NP_059830 | 9257257 WD repeat-containing protein 1 isoform 1                                |
| 957       | NP_059980 | 22129786 gp25L2 protein                                                         |
| 958       | NP_060035 | 24308149 hypothetical protein DKFZp434F2322                                     |
| 959       | NP_060055 | 8923733 sugar transporter (SLC2A6 gene)                                         |
| 960       | NP_060140 | 8923114 ubiquitin-specific protease otubain 1                                   |



| Refseq ID | gi Number | Protein Name/Description                                                        |
|-----------|-----------|---------------------------------------------------------------------------------|
| 961       | NP_060193 | 8923221 hypothetical protein FLJ20245                                           |
| 962       | NP_060227 | 8923289 hypothetical protein FLJ20307                                           |
| 963       | NP_060357 | 8923541 hypothetical protein FLJ20580                                           |
| 964       | NP_060377 | 8923579 hypothetical protein FLJ20625                                           |
| 965       | NP_060378 | 8923582 hypothetical protein FLJ20626                                           |
| 966       | NP_060502 | 8922297 LUC7-like; sarcoplasmic reticulum protein LUC7B1                        |
| 967       | NP_060521 | 21361687 hypothetical protein FLJ10300                                          |
| 968       | NP_060560 | 8922416 hypothetical protein FLJ10420                                           |
| 969       | NP_060605 | 8922511 mitochondrial ribosomal protein S18A; mitochondrial ribosomal protein S |
| 970       | NP_060653 | 8922599 hypothetical protein FLJ10701                                           |
| 971       | NP_060654 | 8922601 hypothetical protein FLJ10702                                           |
| 972       | NP_060676 | 17999541 vacuolar protein sorting 35; maternal-embryonic 3                      |
| 973       | NP_060677 | 8922648 hypothetical protein FLJ10759                                           |
| 974       | NP_060691 | 8922671 chromosome 2 open reading frame 6                                       |
| 975       | NP_060692 | 8922673 parvin, alpha; alpha-parvin; actopaxin                                  |
| 976       | NP_060705 | 8922699 hypothetical protein FLJ10830                                           |
| 977       | NP_060713 | 8922712 hypothetical protein FLJ10849                                           |
| 978       | NP_060719 | 28872786 CDK5 regulatory subunit associated protein 2; CDK5 activator-binding p |
| 979       | NP_060735 | 8922754 hypothetical protein FLJ10901                                           |
| 980       | NP_060760 | 8922804 hypothetical protein FLJ10983                                           |
| 981       | NP_060776 | 8922835 hypothetical protein FLJ11036                                           |
| 982       | NP_060830 | 8922940 chromosome X open reading frame 15                                      |
| 983       | NP_060835 | 8922950 hypothetical protein FLJ11222                                           |
| 984       | NP_060849 | 8922974 hypothetical protein FLJ11280                                           |
| 985       | NP_060899 | 21281669 transcription factor-like nuclear regulator; putative transcription re |
| 986       | NP_060918 | 21361794 TIP120 protein                                                         |
| 987       | NP_060932 | 27544939 uncharacterized hematopoietic stem/progenitor cells protein MDS027     |
| 988       | NP_060935 | 8923932 uncharacterized hematopoietic stem/progenitor cells protein MDS030      |
| 989       | NP_060943 | 8923812 uncharacterized hypothalamus protein HT012                              |
| 990       | NP_060988 | 19923534 MCM10 minichromosome maintenance deficient 10; homolog of yeast MCM10  |
| 991       | NP_061027 | 9055270 low density lipoprotein-related protein 1B (deleted in tumors); low den |
| 992       | NP_061138 | 18105058 vacuolar protein sorting 33B (yeast homolog))                          |
| 993       | NP_061141 | 29725607 smooth muscle cell associated protein-1                                |
| 994       | NP_061158 | 8923904 bridging integrator 3                                                   |
| 995       | NP_061166 | 8922122 elaC homolog 1                                                          |
| 996       | NP_061174 | 24308179 hypothetical protein DKFZp547A023                                      |
| 997       | NP_061720 | 17864092 axonemal dynein heavy chain 7                                          |
| 998       | NP_061816 | 9507215 tubulin, alpha-like 2; tubulin, alpha 8                                 |
| 999       | NP_061820 | 11128019 cytochrome c                                                           |
| 1000      | NP_061846 | 19424120 dolichyl-phosphate mannosyltransferase polypeptide 3 isoform 1; prosti |
| 1001      | NP_061882 | 21361619 TOLLIP protein; Toll-interacting protein                               |
| 1002      | NP_061907 | 9506667 ras homolog gene family, member F                                       |
| 1003      | NP_061934 | 27477132 phosphatidylinositol-3 phosphate 3-phosphatase adaptor subunit; 3-phos |
| 1004      | NP_061969 | 19923499 GTP binding protein 2                                                  |
| 1005      | NP_062826 | 21361827 putative methyltransferase M6A; putative methyltransferase             |
| 1006      | NP_063940 | 9845297 second mitochondria-derived activator of caspase isoform Smac-alpha, pr |
| 1007      | NP_064424 | 29788766 tubulin, beta polypeptide 4, member Q                                  |
| 1008      | NP_064425 | 9910554 solute carrier family 2 (facilitated glucose transporter), member 9; SL |
| 1009      | NP_064505 | 9910280 UDP-glucose ceramide glucosyltransferase-like 1; UDP-glucose:glycoprote |
| 1010      | NP_064535 | 9910542 SAR1a gene homolog 1; SAR1 protein                                      |
| 1011      | NP_064542 | 9910470 otoraplin precursor; fibrocyte-derived protein; melanoma inhibitory act |
| 1012      | NP_064578 | 19923559 EMSY protein                                                           |
| 1013      | NP_064590 | 9910156 zinc finger protein Cezanne                                             |
| 1014      | NP_065089 | 9966825 HEF like Protein                                                        |
| 1015      | NP_065090 | 9966827 PEST-containing nuclear protein                                         |
| 1016      | NP_065123 | 9966867 eIF-5A2 protein; eIF5AII                                                |
| 1017      | NP_065174 | 14149734 coronin, actin binding protein, 1B                                     |
| 1018      | NP_065176 | 27262622 neuron navigator 1; neuron navigator-1; pore membrane and/or filament  |
| 1019      | NP_065392 | 24308201 chromosome 20 open reading frame 3; chromosome 20open reading frame 3  |
| 1020      | NP_065393 | 24431935 reticulon 4; neuroendocrine-specific protein C like (foocen)           |

| Refseq ID      | gi Number | Protein Name/Description                                               |
|----------------|-----------|------------------------------------------------------------------------|
| 1021 NP_065438 | 10140853  | diazepam binding inhibitor; GABA receptor modulator; endozepine; acyl  |
| 1022 NP_065691 | 10190678  | RP42 homolog; squamous cell carcinoma-related oncogene                 |
| 1023 NP_065765 | 29789112  | KIAA1198 protein                                                       |
| 1024 NP_065815 | 18079216  | CASK-interacting protein 1                                             |
| 1025 NP_065871 | 19882229  | P-Rex1                                                                 |
| 1026 NP_066272 | 13994151  | PDZ and LIM domain 1 (elfin); carboxy terminal LIM domain protein 1    |
| 1027 NP_066283 | 10337595  | protein phosphatase 1A isoform 1; protein phosphatase 2C alpha isoform |
| 1028 NP_066299 | 17986258  | smooth muscle and non-muscle myosin alkali light chain isoform 1       |
| 1029 NP_066301 | 11321640  | basic beta 1 syntrophin; 59-DAP; syntrophin, beta 1; syntrophin, beta  |
| 1030 NP_066932 | 11056061  | thymosin, beta 4                                                       |
| 1031 NP_066949 | 13489091  | 3-mercaptopyruvate sulfurtransferase                                   |
| 1032 NP_066953 | 10863927  | peptidylprolyl isomerase A (cyclophilin A)                             |
| 1033 NP_066954 | 29725611  | regulatory subunit PR 53 of protein phosphatase 2A isoform b; phosphot |
| 1034 NP_066967 | 16945970  | PC4 and SFRS1 interacting protein 1; transcriptional coactivator p52/p |
| 1035 NP_066972 | 21624607  | coactosin-like 1                                                       |
| 1036 NP_067000 | 10863977  | LSM2 homolog, U6 small nuclear RNA associated; U6 snRNA-associated Sm- |
| 1037 NP_067022 | 10864011  | sulfide dehydrogenase like; sulfide dehydrogenase like (yeast)         |
| 1038 NP_067033 | 10864021  | MUM2 protein                                                           |
| 1039 NP_067045 | 24308263  | TcD37 homolog; prune                                                   |
| 1040 NP_067058 | 10864047  | epidermal growth factor receptor substrate EPS15R                      |
| 1041 NP_067069 | 10864055  | megakaryocyte-enhanced gene transcript 1 protein; lymphocyte antigen-6 |
| 1042 NP_067075 | 10880989  | RAB18, member RAS oncogene family; RAB18 small GTPase                  |
| 1043 NP_068557 | 11140817  | retinoic acid induced 2                                                |
| 1044 NP_068595 | 21361900  | hypothetical protein MDS018                                            |
| 1045 NP_068711 | 12548785  | gamma-aminobutyric acid (GABA) A receptor, beta 2 isoform 1            |
| 1046 NP_068805 | 11496277  | mitogen-activated protein kinase kinase 1 interacting protein 1; MEK p |
| 1047 NP_071349 | 11545777  | likely ortholog of mouse ubiquitin-conjugating enzyme E2-230K          |
| 1048 NP_071357 | 11545789  | hypothetical protein FLJ22794; KIAA1895 protein                        |
| 1049 NP_071441 | 11545906  | fructosamine-3-kinase                                                  |
| 1050 NP_071496 | 11559923  | eukaryotic translation initiation factor 4H isoform 1                  |
| 1051 NP_071918 | 11968023  | zinc finger protein 106                                                |
| 1052 NP_071930 | 11968039  | hypothetical protein FLJ22405                                          |
| 1053 NP_071934 | 11968045  | hypothetical protein FLJ22056                                          |
| 1054 NP_073565 | 27475985  | neurogenic differentiation 6                                           |
| 1055 NP_073728 | 12707562  | period 2 isoform 2; period, Drosophila, homolog of, 2; period circadia |
| 1056 NP_075049 | 12597635  | B-cell CLL/lymphoma 11B isoform 2; B-cell lymphoma/leukaemia 11B; zinc |
| 1057 NP_075408 | 13259508  | dynactin 1 isoform 2; dynactin 1 (p150, Glued (Drosophila) homolog); p |
| 1058 NP_076933 | 13128974  | hypothetical protein MGC3265                                           |
| 1059 NP_076956 | 13129018  | hypothetical protein MGC3077                                           |
| 1060 NP_076982 | 21359955  | SECIS binding protein 2                                                |
| 1061 NP_078975 | 13375985  | hypothetical protein FLJ14007                                          |
| 1062 NP_078982 | 24432013  | hypothetical protein FLJ13479                                          |
| 1063 NP_079079 | 13376181  | hypothetical protein FLJ21665                                          |
| 1064 NP_079082 | 13376187  | hypothetical protein FLJ23554                                          |
| 1065 NP_079131 | 13376282  | hypothetical protein FLJ12785                                          |
| 1066 NP_079199 | 27477134  | nucleoporin 210; nuclear pore membrane glycoprotein 210; gp210         |
| 1067 NP_079209 | 21281689  | hypothetical protein FLJ12056                                          |
| 1068 NP_079295 | 13376539  | hypothetical protein FLJ13940                                          |
| 1069 NP_079356 | 23308567  | asparaginase-like 1 protein                                            |
| 1070 NP_079390 | 13376689  | hypothetical protein FLJ13615                                          |
| 1071 NP_079413 | 13376719  | hypothetical protein FLJ21439                                          |
| 1072 NP_079434 | 22095371  | RUN and FYVE domain-containing 1                                       |
| 1073 NP_079536 | 19913373  | G6B protein isoform G6b-A precursor; G6B protein; immunoglobulin recep |
| 1074 NP_085056 | 13385594  | cytochrome b5 outer mitochondrial membrane precursor; type 2 cyt-b5    |
| 1075 NP_109591 | 13489087  | serine (or cysteine) proteinase inhibitor, clade B (ovalbumin), member |
| 1076 NP_110400 | 13562114  | beta tubulin 1, class VI                                               |
| 1077 NP_112186 | 21359960  | hypothetical protein PRTD-NY3                                          |
| 1078 NP_112243 | 13569962  | RAB1B, member RAS oncogene family; small GTP-binding protein           |
| 1079 NP_112484 | 13654272  | hypothetical protein HT036                                             |
| 1080 NP_112567 | 13775186  | ring finger protein 17 isoform long                                    |

| Refseq ID      | gi Number | Protein Name/Description                                               |
|----------------|-----------|------------------------------------------------------------------------|
| 1081 NP_112576 | 13775198  | SH3 domain binding glutamic acid-rich protein like 3; SH3BGRL3-like pr |
| 1082 NP_112585 | 23200010  | Williams Beuren syndrome chromosome region 21 isoform 4                |
| 1083 NP_112586 | 13786129  | RAB33B, member RAS oncogene family; likely ortholog of mouse RAB33b    |
| 1084 NP_113620 | 13899253  | uridine-cytidine kinase 1                                              |
| 1085 NP_113646 | 13899297  | B aggressive lymphoma gene                                             |
| 1086 NP_113657 | 13899317  | SH3 domain binding glutamic acid-rich protein like 2                   |
| 1087 NP_113659 | 28626504  | UNC-112 related protein 2                                              |
| 1088 NP_114159 | 13994351  | MSTP043 protein                                                        |
| 1089 NP_114420 | 14042953  | FKSG17                                                                 |
| 1090 NP_115492 | 14149767  | hypothetical protein MGC2599 similar to katanin p60 subunit A 1 2599   |
| 1091 NP_115500 | 14149777  | hypothetical protein DKFZp564D1378                                     |
| 1092 NP_115523 | 14149817  | hypothetical protein DKFZp434D0127                                     |
| 1093 NP_115676 | 14150056  | hypothetical protein MGC10854                                          |
| 1094 NP_115706 | 14161692  | calpain small subunit 2                                                |
| 1095 NP_115712 | 14150122  | hypothetical protein MGC14799                                          |
| 1096 NP_115729 | 14150155  | hypothetical protein MGC10540                                          |
| 1097 NP_115744 | 21362062  | leucine zipper and CTNNBIP1 domain containing                          |
| 1098 NP_115914 | 14210536  | similar to chicken tubulin beta 5                                      |
| 1099 NP_115951 | 14211867  | group XIII secreted phospholipase A2                                   |
| 1100 NP_115956 | 24432022  | testis-specific protein NYD-TSP1                                       |
| 1101 NP_115982 | 14211923  | PKCI-1-related HIT protein                                             |
| 1102 NP_115992 | 14211943  | lysyl oxidase-like 3                                                   |
| 1103 NP_115997 | 20373153  | myosin XVIIIIB; myosin 18B                                             |
| 1104 NP_116093 | 14389309  | tubulin alpha 6                                                        |
| 1105 NP_116120 | 14249348  | hypothetical protein MGC14353                                          |
| 1106 NP_116139 | 14249382  | hypothetical protein MGC15429                                          |
| 1107 NP_116189 | 14249478  | hypothetical protein FLJ14525                                          |
| 1108 NP_116214 | 14249526  | zinc finger protein 382; multiple-zinc-finger-Kruppel-associated box p |
| 1109 NP_116235 | 21361884  | RAB2B                                                                  |
| 1110 NP_116262 | 24497612  | nm23-phosphorylated unknown substrate; SH3 domain-containing 70 kDa pr |
| 1111 NP_149062 | 23097308  | nesprin 1 isoform longest; synaptic nuclei expressed gene 1; nesprin 1 |
| 1112 NP_150094 | 15100168  | CUB and Sushi multiple domains 1                                       |
| 1113 NP_150281 | 15147250  | protein phosphatase 1, regulatory (inhibitor) subunit 14A; 17-kDa PKC- |
| 1114 NP_258259 | 15618995  | keratin 6 irs                                                          |
| 1115 NP_258412 | 15626999  | inosine triphosphatase; Inosine triphosphatase-A                       |
| 1116 NP_277050 | 15723376  | MacGAP protein                                                         |
| 1117 NP_439892 | 16936530  | cyclin-dependent kinase 2 isoform 2; cdc2-related protein kinase; cell |
| 1118 NP_443099 | 24119274  | voltage gated channel like 1; four repeat voltage-gated ion channel    |
| 1119 NP_443114 | 16418391  | zinc finger, imprinted 3                                               |
| 1120 NP_443195 | 16418461  | mitochondrial topoisomerase I                                          |
| 1121 NP_443728 | 28461290  | TRALPUSH; no opposite paired repeat protein                            |
| 1122 NP_444253 | 16950611  | myosin light chain kinase isoform 1; myosin light chain kinase         |
| 1123 NP_444513 | 16751921  | dermcidin precursor; AIDD protein                                      |
| 1124 NP_524144 | 17986273  | fast skeletal myosin alkali light chain 1 isoform 1f; A1 catalytic; A2 |
| 1125 NP_524147 | 17986260  | smooth muscle and non-muscle myosin alkali light chain isoform 2       |
| 1126 NP_542408 | 18087855  | dynein light chain 2                                                   |
| 1127 NP_542775 | 18152767  | synaptotagmin-like 4 (granuphilin-a)                                   |
| 1128 NP_542937 | 18375611  | dachshund homolog isoform a                                            |
| 1129 NP_543010 | 21361785  | histidyl-tRNA synthetase 2; histidyl-tRNA synthetase; bA379J5.3; chrom |
| 1130 NP_543152 | 18254478  | dual specificity phosphatase 19; protein phosphatase; stress-activated |
| 1131 NP_570138 | 18640750  | regulator of G-protein signalling 18; regulator of G-protein signaling |
| 1132 NP_570602 | 21071030  | alpha 1B-glycoprotein                                                  |
| 1133 NP_570967 | 18702323  | dynein, cytoplasmic, light polypeptide 2B; dynein light chain 2B; bith |
| 1134 NP_596870 | 20143916  | titin isoform novex-3; connectin; CMH9, included; cardiomyopathy, dila |
| 1135 NP_597702 | 20143964  | glutamate receptor, ionotropic, N-methyl-D-aspartate 3A                |
| 1136 NP_612366 | 24308400  | hypothetical protein BC010682                                          |
| 1137 NP_612460 | 19923981  | hypothetical protein BC013151                                          |
| 1138 NP_612469 | 19923993  | chemokine-like factor super family 5                                   |
| 1139 NP_620061 | 20270259  | phosphoglycerate kinase 2; phosphoglycerate kinase 1, pseudogene 2     |
| 1140 NP_620124 | 20270303  | mitochondrial Rho 2                                                    |

| Refseq ID      | gi Number | Protein Name/Description                                               |
|----------------|-----------|------------------------------------------------------------------------|
| 1141 NP_620150 | 20270343  | hypothetical protein BC015408                                          |
| 1142 NP_620411 | 20452464  | similar to endothelial cell-selective adhesion molecule; likely orthol |
| 1143 NP_620688 | 21265064  | a disintegrin-like and metalloprotease (repolysin type) with thrombos  |
| 1144 NP_631960 | 21245108  | TGFB-induced factor 2-like, Y-linked                                   |
| 1145 NP_653164 | 21389337  | ribose 5-phosphate isomerase A (ribose 5-phosphate epimerase); RIBOSE  |
| 1146 NP_653174 | 21389339  | likely ortholog of rat F-actin binding protein nexilin                 |
| 1147 NP_653263 | 21389549  | hypothetical protein MGC26605                                          |
| 1148 NP_653321 | 21389505  | hypothetical protein FLJ31564                                          |
| 1149 NP_659415 | 21450665  | hypothetical protein FLJ32745                                          |
| 1150 NP_659447 | 21450721  | hypothetical protein MGC26778                                          |
| 1151 NP_659501 | 21450838  | hypothetical protein MGC2793                                           |
| 1152 NP_660202 | 21624643  | similar to CG3714 gene product                                         |
| 1153 NP_660295 | 21687060  | similar to common salivary protein 1                                   |
| 1154 NP_665807 | 21956645  | myotrophin; granule cell differentiation protein                       |
| 1155 NP_689476 | 22748619  | tropomyosin 3                                                          |
| 1156 NP_689522 | 22748683  | hypothetical protein FLJ35564                                          |
| 1157 NP_689541 | 22748717  | hypothetical protein FLJ38602                                          |
| 1158 NP_689584 | 22748799  | hypothetical protein MGC26818                                          |
| 1159 NP_689590 | 22748811  | hypothetical protein MGC34837                                          |
| 1160 NP_689598 | 22748825  | hypothetical protein FLJ31438                                          |
| 1161 NP_689616 | 22748857  | hypothetical protein FLJ39155                                          |
| 1162 NP_689628 | 22748879  | hypothetical protein FLJ32642                                          |
| 1163 NP_689663 | 22748945  | hypothetical protein MGC26690                                          |
| 1164 NP_689761 | 22749143  | hypothetical protein FLJ25333                                          |
| 1165 NP_689822 | 22749247  | hypothetical protein FLJ32001                                          |
| 1166 NP_689936 | 22749429  | hypothetical protein FLJ38159                                          |
| 1167 NP_689973 | 22749489  | hypothetical protein FLJ30934                                          |
| 1168 NP_689979 | 22749499  | hypothetical protein MGC40107                                          |
| 1169 NP_690007 | 23065535  | hypoxia-inducible factor-3 alpha isoform a; inhibitory PAS domain prot |
| 1170 NP_690870 | 23097264  | hypothetical protein DKFZp761P1121                                     |
| 1171 NP_694968 | 23397516  | immune associated nucleotide protein                                   |
| 1172 NP_694978 | 23397534  | hypothetical protein MGC45491                                          |
| 1173 NP_695023 | 23463289  | family with sequence similarity 10, member A5                          |
| 1174 NP_699160 | 23503239  | hypothetical protein MGC10204                                          |
| 1175 NP_699179 | 24158492  | F-box only protein 29; F-box protein Fbx29                             |
| 1176 NP_705691 | 24111244  | MAM domain containing glycosylphosphatidylinositol anchor 1; glycosyl- |
| 1177 NP_705840 | 23957682  | heparan sulfate 3-OST-5                                                |
| 1178 NP_705935 | 24119203  | tropomyosin 3                                                          |
| 1179 NP_722516 | 24429572  | TBP-associated factor RNA polymerase 1-like                            |
| 1180 NP_775771 | 28466991  | tau-tubulin kinase                                                     |
| 1181 NP_776155 | 28603830  | hypothetical protein MGC51029                                          |
| 1182 NP_777550 | 28376664  | hypothetical protein LOC93550                                          |
| 1183 NP_777604 | 28372565  | hypothetical protein LOC283629                                         |
| 1184 NP_778250 | 28376654  | hypothetical protein INM01                                             |
| 1185 NP_783313 | 28269681  | NADH-ubiquinone oxidoreductase subunit B14.7                           |
| 1186 NP_783865 | 28376635  | Rab37-like                                                             |
| 1187 NP_786886 | 28395033  | ras homolog gene family, member C; Aplysia RAS-related homolog 9 (onco |
| 1188 NP_787068 | 28557683  | hypothetical protein FLJ38451                                          |
| 1189 NP_787082 | 28557709  | hypothetical protein LOC221823                                         |
| 1190 NP_789797 | 28827809  | nucleoside diphosphate kinase B-like                                   |
| 1191 NP_803875 | 29150259  | fibrocystin L; polycystic kidney and hepatic disease-like 1            |
| 1192 XP_015334 | 27478053  | similar to heat shock 70kD protein binding protein; progesterone recep |
| 1193 XP_016144 | 14745898  | similar to tyrosine 3-monooxygenase/tryptophan 5-monooxygenase activat |
| 1194 XP_016625 | 13637631  | similar to voltage-dependent anion channel isoform 2                   |
| 1195 XP_017966 | 17444699  | similar to Reticulon protein 3 (Neuroendocrine-specific protein-like 2 |
| 1196 XP_028810 | 27500963  | similar to KIAA1755 protein                                            |
| 1197 XP_028966 | 18591697  | similar to DnaJ homolog subfamily C member 5 (Cysteine string protein) |
| 1198 XP_029179 | 27498357  | similar to filamin-interacting protein L-Filip; filamin-interacting pr |
| 1199 XP_031223 | 20536114  | similar to Hypothetical protein KIAA1034                               |
| 1200 XP_031992 | 27498919  | similar to RRP5 protein homolog                                        |

| Refseq ID      | gi Number | Protein Name/Description                                                |
|----------------|-----------|-------------------------------------------------------------------------|
| 1201 XP_032693 | 14779875  | similar to KIAA0420                                                     |
| 1202 XP_033004 | 14780596  | hypothetical protein BC005107                                           |
| 1203 XP_033371 | 22048001  | similar to DKFZP564O092 protein                                         |
| 1204 XP_033811 | 20553919  | similar to hypothetical protein FLJ14775                                |
| 1205 XP_035037 | 22065231  | similar to MEGF7                                                        |
| 1206 XP_035527 | 16160851  | similar to KIAA1370 protein                                             |
| 1207 XP_035638 | 15306356  | similar to interleukin 25; lymphocyte antigen 6 complex, locus E ligand |
| 1208 XP_036408 | 22045984  | similar to KIAA1228 protein                                             |
| 1209 XP_037574 | 14765644  | similar to PTPL1-associated RhoGAP 1                                    |
| 1210 XP_037817 | 30148409  | similar to hypothetical protein FLJ20035                                |
| 1211 XP_038288 | 27480017  | similar to The KIAA0191 gene is expressed ubiquitously.~The KIAA0191 p  |
| 1212 XP_039259 | 29732431  | similar to modifier of cell adhesion                                    |
| 1213 XP_042500 | 14724206  | similar to ribosomal protein S2; 40S ribosomal protein S2               |
| 1214 XP_045792 | 27499681  | similar to RIKEN cDNA G431004K08                                        |
| 1215 XP_047659 | 22048785  | similar to KIAA0532 protein                                             |
| 1216 XP_050793 | 27479431  | similar to KIAA1393 protein                                             |
| 1217 XP_051091 | 27499555  | similar to SF21 protein                                                 |
| 1218 XP_051854 | 14749486  | similar to Mesoderm development candidate 2                             |
| 1219 XP_053177 | 20535366  | similar to Tubulin alpha-3/alpha-7 chain (Alpha-tubulin 3/7)            |
| 1220 XP_058577 | 27499572  | similar to chromosome 11 open reading frame 25                          |
| 1221 XP_058957 | 17482508  | similar to QIL1                                                         |
| 1222 XP_059066 | 22041780  | similar to 14-3-3 protein sigma (Stratifin) (Epithelial cell marker pr  |
| 1223 XP_059067 | 17438583  | similar to nucleophosmin (nucleolar phosphoprotein B23, numatrin); Nuc  |
| 1224 XP_059465 | 17445600  | similar to ribosomal protein S15                                        |
| 1225 XP_059776 | 17464200  | similar to FK506-binding protein 1A; FK506-binding protein 1; FK506-bi  |
| 1226 XP_060104 | 30147721  | similar to RIKEN cDNA 5430400H23                                        |
| 1227 XP_060316 | 29728979  | similar to Olfactory receptor 2T1 (Olfactory receptor 1-25) (OR1-25)    |
| 1228 XP_060320 | 30147184  | similar to ATP-dependent DNA helicase II, 70 kDa subunit (Lupus Ku aut  |
| 1229 XP_060398 | 17440821  | similar to peptidylprolyl isomerase A (cyclophilin A)                   |
| 1230 XP_060887 | 17450333  | similar to peptidyl-Pro cis trans isomerase                             |
| 1231 XP_061930 | 17473323  | similar to Homeobox protein DBX1                                        |
| 1232 XP_062437 | 30156394  | similar to Keratin, type I cytoskeletal 18 (Cytokeratin 18) (K18) (CK   |
| 1233 XP_062669 | 27499559  | similar to lactate dehydrogenase A -like                                |
| 1234 XP_062849 | 17475428  | similar to Proteasome subunit alpha type 6 (Proteasome iota chain) (Ma  |
| 1235 XP_065237 | 22042381  | similar to FKSG30                                                       |
| 1236 XP_066916 | 17486695  | similar to cytosolic malate dehydrogenase                               |
| 1237 XP_067176 | 29730275  | similar to peptidylprolyl isomerase A (cyclophilin A)                   |
| 1238 XP_067423 | 17439599  | similar to destrin - pig                                                |
| 1239 XP_067503 | 17440554  | similar to peptidyl-Pro cis trans isomerase                             |
| 1240 XP_067504 | 20535081  | similar to Cop-coated vesicle membrane protein p24 precursor (p24A)     |
| 1241 XP_068464 | 29737116  | similar to 60S ribosomal protein L19                                    |
| 1242 XP_069253 | 17463729  | similar to prohibitin                                                   |
| 1243 XP_069750 | 17448269  | similar to GDP dissociation inhibitor isoform 2; GDI-2                  |
| 1244 XP_070805 | 30149697  | similar to prohibitin                                                   |
| 1245 XP_071133 | 17452829  | similar to ATP synthase, H+ transporting, mitochondrial F0 complex, su  |
| 1246 XP_084467 | 29739581  | similar to eukaryotic initiation factor 5A                              |
| 1247 XP_084514 | 27484943  | similar to heat shock 90kDa protein 1, alpha; heat shock 90kDa protein  |
| 1248 XP_084610 | 22065448  | similar to tubulin alpha-1 chain - Chinese hamster                      |
| 1249 XP_085123 | 29736026  | similar to Ras-related protein Rab-15                                   |
| 1250 XP_085748 | 18588342  | similar to KIAA1039 protein                                             |
| 1251 XP_086001 | 29741322  | similar to placental protein 13; galectin-13                            |
| 1252 XP_086916 | 18543899  | similar to Phosphatidylethanolamine-binding protein (PEBP) (Prostatic   |
| 1253 XP_086931 | 20532885  | similar to epsilon isoform of 14-3-3 protein                            |
| 1254 XP_087062 | 18551340  | similar to 60S acidic ribosomal protein P1                              |
| 1255 XP_087572 | 18558709  | similar to bA291L22.2 (similar to CDC10 (cell division cycle 10, S. ce  |
| 1256 XP_087939 | 22053085  | similar to tubulin, beta 5                                              |
| 1257 XP_088293 | 22060072  | similar to cytochrome c                                                 |
| 1258 XP_088391 | 20539300  | similar to tropomyosin 4                                                |
| 1259 XP_088393 | 18571222  | similar to destrin - pig                                                |
| 1260 XP_088476 | 18572267  | similar to thioredoxin domain containing 4; endoplasmic reticulum resi  |

| Refseq ID      | gi Number | Protein Name/Description                                               |
|----------------|-----------|------------------------------------------------------------------------|
| 1261 XP_089309 | 18600882  | similar to Cyclophilin-LC                                              |
| 1262 XP_095590 | 18570595  | similar to myosin regulatory light chain                               |
| 1263 XP_096852 | 22054400  | hypothetical protein XP_096852                                         |
| 1264 XP_097006 | 18585927  | similar to MUSP1                                                       |
| 1265 XP_097771 | 27485697  | similar to hypothetical protein                                        |
| 1266 XP_113714 | 22059372  | similar to Density-regulated protein (DRP) (DRP1 protein) (Smooth musc |
| 1267 XP_113950 | 27500274  | similar to Munc13-4 protein                                            |
| 1268 XP_114482 | 20547107  | similar to HEAT SHOCK 70 KDA PROTEIN 4 (HEAT SHOCK 70-RELATED PROTEIN  |
| 1269 XP_114617 | 22059949  | similar to tubulin, beta 5                                             |
| 1270 XP_115639 | 20546215  | similar to leukocyte immunoglobulin-like receptor, subfamily B (with T |
| 1271 XP_115812 | 20536967  | similar to Latent transforming growth factor beta binding protein 1L p |
| 1272 XP_115995 | 20470897  | similar to protease (prosome, macropain) 26S subunit, ATPase 1         |
| 1273 XP_116321 | 20540570  | similar to 60 kDa heat shock protein, mitochondrial precursor (Hsp60)  |
| 1274 XP_116396 | 20543399  | similar to peptidylprolyl isomerase A (cyclophilin A)                  |
| 1275 XP_117198 | 27481006  | hypothetical protein XP_117198                                         |
| 1276 XP_166112 | 27482697  | similar to KIAA1217 protein                                            |
| 1277 XP_166241 | 20483052  | similar to PTD015 protein                                              |
| 1278 XP_166266 | 20547663  | similar to Esterase D                                                  |
| 1279 XP_166506 | 22045787  | similar to Elongation factor 1-alpha 1 (EF-1-alpha-1) (Elongation fact |
| 1280 XP_166540 | 20540302  | similar to Heat shock cognate 71 kDa protein                           |
| 1281 XP_167021 | 20551618  | similar to calponin 2; Caloin 2                                        |
| 1282 XP_170195 | 30151001  | similar to ADP,ATP carrier protein, fibroblast isoform (ADP/ATP transl |
| 1283 XP_171081 | 22043610  | similar to ras-related C3 botulinum toxin substrate 1 isoform Rac1; rh |
| 1284 XP_171113 | 30153852  | similar to Moesin (Membrane-organizing extension spike protein)        |
| 1285 XP_171447 | 22063113  | similar to elongin B; transcription elongation factor B (SIII), polype |
| 1286 XP_208062 | 27485813  | similar to ARP2/3 complex 21 kDa subunit (P21-ARC) (Actin-related prot |
| 1287 XP_208162 | 27483766  | similar to PTK9 protein tyrosine kinase 9; protein tyrosine kinase 9   |
| 1288 XP_208215 | 27480104  | similar to triosephosphate isomerase 1                                 |
| 1289 XP_208217 | 27481160  | similar to elongation factor 1 alpha                                   |
| 1290 XP_208225 | 27480253  | similar to hypothetical protein FLJ20420                               |
| 1291 XP_208234 | 27481323  | similar to unactive progesterone receptor, 23 kD; likely ortholog of m |
| 1292 XP_208238 | 27480842  | similar to bA92K2.2 (similar to ubiquitin)                             |
| 1293 XP_208313 | 27477800  | similar to tropomyosin 4                                               |
| 1294 XP_208318 | 30147468  | similar to hypothetical protein                                        |
| 1295 XP_208411 | 27478749  | similar to L-lactate dehydrogenase A chain (LDH-A) (LDH muscle subunit |
| 1296 XP_208709 | 27482573  | similar to Ubiquitin-conjugating enzyme E2-18 kDa UbcH7 (Ubiquitin-pro |
| 1297 XP_208746 | 27479531  | similar to golgi complex associated protein 1; golgi resident protein  |
| 1298 XP_208872 | 27500008  | similar to tropomyosin 3                                               |
| 1299 XP_208901 | 27500115  | similar to ubiquitin-conjugating enzyme E2M; UBC12 homolog, yeast      |
| 1300 XP_209234 | 29727772  | similar to hypothetical protein                                        |
| 1301 XP_209737 | 27498267  | similar to tyrosine 3/tryptophan 5 -monooxygenase activation protein,  |
| 1302 XP_210183 | 30158009  | similar to 60S ribosomal protein L7a (Surfeit locus protein 3) (PLA-X  |
| 1303 XP_210184 | 30158216  | similar to hypothetical protein BC015353                               |
| 1304 XP_210460 | 27501260  | similar to Glyceraldehyde 3-phosphate dehydrogenase, liver (GAPDH)     |
| 1305 XP_210540 | 30149460  | similar to Heat shock protein HSP 90-alpha (HSP 86)                    |
| 1306 XP_210550 | 30147105  | similar to Chain , Aldose Reductase (E.C.1.1.1.21) Mutant With Tyr 48  |
| 1307 XP_210576 | 30149984  | similar to RIKEN cDNA 4921517D21                                       |
| 1308 XP_210664 | 27484737  | similar to MRDS1 protein                                               |
| 1309 XP_210750 | 27478732  | similar to ATP synthase, H+ transporting, mitochondrial F0 complex, su |
| 1310 XP_212118 | 27479210  | hypothetical protein XP_212118                                         |
| 1311 XP_212565 | 27498332  | similar to tubulin, beta 5                                             |
| 1312 XP_290546 | 29745994  | similar to KIAA0830 protein                                            |
| 1313 XP_290702 | 29747201  | similar to My016 protein                                               |
| 1314 XP_290742 | 29737976  | similar to Phosphoribosylformylglycinamide synthase (FGAM synthase)    |
| 1315 XP_290747 | 29737978  | similar to Myosin heavy chain, nonmuscle type B (Cellular myosin heavy |
| 1316 XP_290872 | 29727204  | similar to Pyruvate kinase, M2 isozyme                                 |
| 1317 XP_290989 | 29728414  | similar to myosin-I, Myr 1c (alternatively spliced) - rat              |
| 1318 XP_290995 | 29729345  | similar to speckle-type POZ protein                                    |
| 1319 XP_291064 | 29731000  | similar to KIAA0540 protein                                            |
| 1320 XP_291117 | 29734141  | similar to succinate dehydrogenase flavoprotein subunit                |

| Refseq ID      | gi Number | Protein Name/Description                                               |
|----------------|-----------|------------------------------------------------------------------------|
| 1321 XP_291183 | 29742410  | similar to TREM-like transcript 1                                      |
| 1322 XP_291269 | 29734552  | similar to KIAA1875 protein                                            |
| 1323 XP_291384 | 29727565  | similar to Cytochrome c, somatic                                       |
| 1324 XP_291446 | 30149221  | similar to Heat shock cognate 71 kDa protein                           |
| 1325 XP_291459 | 29729329  | similar to Cofilin, non-muscle isoform (18 kDa phosphoprotein) (P18)   |
| 1326 XP_291482 | 29730023  | similar to 78 kDa glucose-regulated protein precursor (GRP 78) (Immuno |
| 1327 XP_291501 | 30148728  | similar to Heterogeneous nuclear ribonucleoprotein A1 (Helix-destabili |
| 1328 XP_291520 | 30148978  | similar to Keratin, type I cytoskeletal 18 (Cytokeratin 18) (K18) (CK  |
| 1329 XP_291550 | 29732170  | similar to Heat shock protein HSP 90-alpha (HSP 86)                    |
| 1330 XP_291573 | 30149784  | similar to elongation factor 1 alpha                                   |
| 1331 XP_291587 | 29732725  | similar to Endoplasmic precursor (94 kDa glucose-regulated protein) (G |
| 1332 XP_291603 | 29732955  | similar to glyceraldehyde 3-phosphate dehydrogenase                    |
| 1333 XP_291660 | 29738713  | similar to RIKEN cDNA 5730509K17 gene                                  |
| 1334 XP_291710 | 29739273  | similar to Ras suppressor protein 1 (Rsu-1) (RSP-1)                    |
| 1335 XP_291724 | 29739720  | similar to 60S RIBOSOMAL PROTEIN L26                                   |
| 1336 XP_291762 | 29741138  | similar to hypothetical protein MGC33214                               |
| 1337 XP_291768 | 29740995  | similar to Proteasome activator complex subunit 2 (Proteasome activato |
| 1338 XP_292125 | 29745118  | similar to submaxillary apomucin                                       |
| 1339 XP_292133 | 30157216  | similar to genethonin 1                                                |
| 1340 XP_292188 | 29738504  | similar to ribosomal protein L31                                       |
| 1341 XP_292230 | 29736201  | similar to DnaJ homolog subfamily C member 8 (Splicing protein spf31)  |
| 1342 XP_292459 | 29741994  | similar to alpha tubulin                                               |
| 1343 XP_292513 | 30158844  | similar to KIAA1879 protein                                            |
| 1344 XP_292801 | 30155465  | similar to RIKEN cDNA 2310076L09                                       |
| 1345 XP_292814 | 30155919  | similar to zinc finger protein 433                                     |
| 1346 XP_292963 | 29729616  | similar to peptidylprolyl isomerase A (cyclophilin A)                  |
| 1347 XP_292964 | 30150271  | similar to Heat shock protein HSP 90-beta (HSP 84) (Tumor specific tra |
| 1348 XP_292982 | 30148842  | similar to FKSG30                                                      |
| 1349 XP_292989 | 30148924  | similar to SOCS box protein ASB-18                                     |
| 1350 XP_293007 | 30147857  | similar to peptidylprolyl isomerase A (cyclophilin A)                  |
| 1351 XP_293010 | 30150299  | similar to keratin 8, type II cytoskeletal - human                     |
| 1352 XP_293011 | 29731062  | hypothetical protein XP_293011                                         |
| 1353 XP_293023 | 29731325  | similar to peptidyl-Pro cis trans isomerase                            |
| 1354 XP_293027 | 29731460  | similar to ADP,ATP carrier protein, fibroblast isoform (ADP/ATP transl |
| 1355 XP_293042 | 29731857  | similar to ribosomal protein S12; 40S ribosomal protein S12            |
| 1356 XP_293066 | 30150448  | similar to Stress-70 protein, mitochondrial precursor (75 kDa glucose  |
| 1357 XP_293276 | 29743324  | similar to Heat shock 27 kDa protein (HSP 27) (Stress-responsive prote |
| 1358 XP_293277 | 30156347  | similar to keratin 8; cytokeratin 8; keratin, type II cytoskeletal 8   |
| 1359 XP_293394 | 30157691  | similar to Nucleolar phosphoprotein p130 (Nucleolar 130 kDa protein) ( |
| 1360 XP_293411 | 30157848  | similar to Keratin, type I cytoskeletal 18 (Cytokeratin 18) (K18) (CK  |
| 1361 XP_293563 | 29729703  | similar to huntingtin-associated protein interacting protein (duo)     |
| 1362 XP_293567 | 29729857  | similar to 60 kDa heat shock protein, mitochondrial precursor (Hsp60)  |
| 1363 XP_293602 | 30148456  | similar to glutathione-S-transferase like; glutathione transferase ome |
| 1364 XP_293610 | 30148492  | similar to Heat shock cognate 71 kDa protein                           |
| 1365 XP_293669 | 30147623  | similar to actinin, alpha 4                                            |
| 1366 XP_293672 | 30149327  | similar to ebiP7687                                                    |
| 1367 XP_293689 | 29728393  | similar to Heterogeneous nuclear ribonucleoprotein A1 (Helix-destabili |
| 1368 XP_293716 | 30148644  | similar to Heat shock protein HSP 90-alpha (HSP 86)                    |
| 1369 XP_293759 | 29729950  | similar to Heat shock protein HSP 90-alpha (HSP 86)                    |
| 1370 XP_293762 | 30147536  | similar to bridging integrator 2; bridging integrator-2; breast cancer |
| 1371 XP_293786 | 29730632  | similar to RAN, member RAS oncogene family                             |
| 1372 XP_293814 | 29733950  | similar to Keratin, type I cytoskeletal 18 (Cytokeratin 18) (K18) (CK  |
| 1373 XP_293924 | 29736622  | similar to cytoplasmic beta-actin                                      |
| 1374 XP_293925 | 30153515  | similar to phosphoglycerate mutase (EC 5.4.2.1) B chain - rat          |
| 1375 XP_293932 | 30153966  | similar to hypothetical protein BC013073                               |
| 1376 XP_293967 | 30154095  | similar to gamma actin-like protein                                    |
| 1377 XP_294006 | 29739002  | similar to 60S ribosomal protein L6 (TAX-responsive enhancer element b |
| 1378 XP_294015 | 29739414  | similar to Glyceraldehyde 3-phosphate dehydrogenase, liver (GAPDH)     |
| 1379 XP_294035 | 30160191  | similar to Pyruvate kinase, M1 isozyme (Pyruvate kinase muscle isozyme |
| 1380 XP_294045 | 29740794  | similar to Translationally controlled tumor protein (TCTP) (p23) (Hist |

| Refseq ID      | gi Number | Protein Name/Description                                               |
|----------------|-----------|------------------------------------------------------------------------|
| 1381 XP_294070 | 29741246  | similar to Glyceraldehyde 3-phosphate dehydrogenase, liver (GAPDH)     |
| 1382 XP_294099 | 29742827  | similar to myosin:SUBUNIT=regulatory light chain                       |
| 1383 XP_294103 | 29742841  | similar to 60S ribosomal protein L35                                   |
| 1384 XP_294126 | 30155280  | similar to Keratin, type I cytoskeletal 18 (Cytokeratin 18) (K18) (CK  |
| 1385 XP_294215 | 29734916  | similar to argininosuccinate synthetase                                |
| 1386 XP_294234 | 30152366  | similar to chromosome condensation-related SMC-associated protein 1    |
| 1387 XP_294438 | 30150422  | similar to ribosomal protein L5; 60S ribosomal protein L5              |
| 1388 XP_294519 | 29732043  | similar to chromosome 15 open reading frame 2                          |
| 1389 XP_294531 | 30151752  | similar to seven transmembrane helix receptor                          |
| 1390 XP_294548 | 29733417  | similar to hypothetical protein FLJ90396                               |
| 1391 XP_294951 | 29729918  | hypothetical protein XP_294951                                         |
| 1392 XP_295854 | 29741003  | hypothetical protein XP_295854                                         |
| 1393 XP_296036 | 29746056  | hypothetical protein XP_296036                                         |
| 1394 XP_296484 | 29736279  | hypothetical protein XP_296484                                         |
| 1395 XP_296644 | 29740531  | hypothetical protein XP_296644                                         |
| 1396 XP_296859 | 30159103  | hypothetical protein XP_296859                                         |
| 1397 XP_297088 | 29743107  | hypothetical protein XP_297088                                         |
| 1398 XP_297109 | 29743501  | hypothetical protein XP_297109                                         |
| 1399 XP_297123 | 29743626  | hypothetical protein XP_297123                                         |
| 1400 XP_297463 | 29730163  | hypothetical protein XP_297463                                         |
| 1401 XP_297644 | 29732344  | hypothetical protein XP_297644                                         |
| 1402 XP_297653 | 29732368  | hypothetical protein XP_297653                                         |
| 1403 XP_297707 | 29732788  | hypothetical protein XP_297707                                         |
| 1404 XP_297980 | 30157526  | hypothetical protein XP_297980                                         |
| 1405 XP_298144 | 29727317  | hypothetical protein XP_298144                                         |
| 1406 XP_298422 | 29727249  | hypothetical protein XP_298422                                         |
| 1407 XP_298663 | 29730354  | hypothetical protein XP_298663                                         |
| 1408 XP_299053 | 30154099  | similar to High mobility group protein 1 (HMG-1) (Amphoterin) (Heparin |
| 1409 XP_299177 | 29740132  | hypothetical protein XP_299177                                         |
| 1410 XP_299313 | 30155257  | hypothetical protein XP_299313                                         |
| 1411 XP_299768 | 29734623  | hypothetical protein XP_299768                                         |
| 1412 XP_299876 | 29735989  | hypothetical protein XP_299876                                         |
| 1413 XP_300550 | 30157434  | similar to cDNA sequence, BC023835                                     |
| 1414 XP_300862 | 30150022  | similar to beta-tubulin 4Q                                             |
| 1415 XP_301130 | 30148988  | similar to Zinc finger protein 132                                     |
| 1416 XP_301154 | 30149555  | similar to heat shock protein 86                                       |
| 1417 XP_301187 | 30151108  | similar to actin beta, cytoskeletal - Kenyan clawed frog               |
| 1418 XP_301313 | 30156575  | similar to caspase 1 isoform alpha precursor; interleukin 1-beta conve |
| 1419 XP_301321 | 30156971  | similar to Tubulin alpha-4 chain (Alpha-tubulin 4)                     |
| 1420 XP_301350 | 30158159  | similar to 60S RIBOSOMAL PROTEIN L34                                   |
| 1421 XP_301421 | 30158489  | similar to Chloride intracellular channel protein 1 (Nuclear chloride  |
| 1422 XP_301425 | 30152949  | similar to Heat shock protein HSP 90-beta (HSP 84) (HSP 90)            |
| 1423 XP_301443 | 30153769  | similar to eukaryotic translation initiation factor 4A1; initiation fa |
| 1424 XP_301485 | 30153076  | similar to ubiquitin-conjugating enzyme E2N; 1500026J17Rik             |
| 1425 XP_301494 | 30152971  | similar to RIKEN cDNA C730036D15                                       |
| 1426 XP_301540 | 30154839  | similar to keratin 8; cytokeratin 8; keratin, type II cytoskeletal 8   |
| 1427 XP_301571 | 30156116  | similar to Dual specificity protein phosphatase 3 (Dual specificity pr |
| 1428 XP_301583 | 30158852  | similar to actin CA15 - sea squirt (Styela clava) (fragments)          |
| 1429 XP_301585 | 30158950  | similar to natural killer cell transcript 4                            |
| 1430 XP_301652 | 30156349  | similar to Eukaryotic initiation factor 4A-II (eIF-4A-II) (eIF4A-II)   |
| 1431 XP_301676 | 30157049  | similar to G1/S-specific cyclin D3                                     |
| 1432 XP_301750 | 30147736  | similar to Heterogeneous nuclear ribonucleoprotein A1 (Helix-destabili |
| 1433 XP_301830 | 30150354  | similar to Heterogeneous nuclear ribonucleoprotein A1 (Helix-destabili |
| 1434 XP_301845 | 30157774  | similar to Kunitz-type protease inhibitor 3 (HKIB9)                    |
| 1435 XP_301899 | 30159310  | similar to beta-actin                                                  |
| 1436 XP_302052 | 30148500  | similar to cytoplasmic actin                                           |
| 1437 XP_302053 | 30148290  | similar to transrationally controlled tumor protein                    |
| 1438 XP_302059 | 30148346  | similar to MLRQ subunit of the NADH: ubiquinone oxidoreductase complex |
| 1439 XP_302138 | 30149013  | similar to alpha tubulin                                               |
| 1440 XP_302246 | 30159830  | similar to HSPC280                                                     |



---

| <b>Refseq ID</b>      | <b>gi Number</b> | <b>Protein Name/Description</b> |
|-----------------------|------------------|---------------------------------|
| <b>1441</b> XP_303117 | 30148125         | hypothetical protein XP_303117  |
| <b>1442</b> XP_303366 | 30155338         | hypothetical protein XP_303366  |
| <b>1443</b> XP_304146 | 30156276         | hypothetical protein XP_304146  |
| <b>1444</b> XP_304295 | 30147267         | hypothetical protein XP_304295  |
| <b>1445</b> XP_304825 | 30147562         | hypothetical protein XP_304825  |
| <b>1446</b> XP_305433 | 30155210         | hypothetical protein XP_305433  |
| <b>1447</b> XP_305444 | 30155531         | hypothetical protein XP_305444  |
| <b>1448</b> XP_305530 | 30152324         | hypothetical protein XP_305530  |
| <b>1449</b> XP_305800 | 30152584         | hypothetical protein XP_305800  |
| <b>1450</b> XP_305804 | 30149452         | hypothetical protein XP_305804  |
| <b>1451</b> XP_305873 | 30150883         | hypothetical protein XP_305873  |
