# Supplementary material for: Proteomic and Phospho-Proteomic Profile of Human Platelets in Basal, Resting State: Insights into Integrin Signaling
Source: PubMed Central journal article supplement (PMC2762604; doi:10.1371/journal.pone.0007627), 2009-10-27
Supplement: pone.0007627.s008.pdf [file pone.0007627.s008.pdf]

| Entry name     | Gene names     | Uniprot Accession | Protein names                                                                                                                                                                                                                                                                                                                                                                                                                                                                                                                                                                                                                                                                                      | Gene Ontology                                                                                                                                                                                                                                                                                                                                                                                                                        | Subcellular Localization                                                                                                                                                           | Protein family          |
|----------------|----------------|-------------------|----------------------------------------------------------------------------------------------------------------------------------------------------------------------------------------------------------------------------------------------------------------------------------------------------------------------------------------------------------------------------------------------------------------------------------------------------------------------------------------------------------------------------------------------------------------------------------------------------------------------------------------------------------------------------------------------------|--------------------------------------------------------------------------------------------------------------------------------------------------------------------------------------------------------------------------------------------------------------------------------------------------------------------------------------------------------------------------------------------------------------------------------------|------------------------------------------------------------------------------------------------------------------------------------------------------------------------------------|-------------------------|
| 1 1433B_HUMAN  | YWHAB          | P31946            | 14-3-3 protein beta/alpha (Protein kinase C inhibitor protein 1) (KCIP-1) (Protein 1054) [Cleaved into: 14-3-3 protein beta/alpha, N-terminally processed]                                                                                                                                                                                                                                                                                                                                                                                                                                                                                                                                         | Ras protein signal transduction; activation of pro-apoptotic gene products; centrosome; cytosol; enzyme binding; melanosome; negative regulation of protein amino acid dephosphorylation; nucleus; perinuclear region of cytoplasm; positive regulation of catalytic activity; protein domain specific binding                                                                                                                       | Cytoplasm. Melanosome.                                                                                                                                                             | 14-3-3 family           |
| 2 1433E_HUMAN  | YWHAE          | P62258            | 14-3-3 protein epsilon (14-3-3E)                                                                                                                                                                                                                                                                                                                                                                                                                                                                                                                                                                                                                                                                   | enzyme binding; interspecies interaction between organisms; intracellular signaling cascade; melanosome                                                                                                                                                                                                                                                                                                                              | Cytoplasm. Melanosome.                                                                                                                                                             | 14-3-3 family           |
| 3 1433G_HUMAN  | YWHAG          | P61981            | 14-3-3 protein gamma (Protein kinase C inhibitor protein 1) (KCIP-1) [Cleaved into: 14-3-3 protein gamma, N-terminally processed]                                                                                                                                                                                                                                                                                                                                                                                                                                                                                                                                                                  | cytoplasm; insulin-like growth factor receptor binding; negative regulation of protein kinase activity; protein kinase C binding; protein kinase C inhibitor activity; regulation of neuron differentiation; regulation of signal transduction; regulation of synaptic plasticity                                                                                                                                                    | Cytoplasm.                                                                                                                                                                         | 14-3-3 family           |
| 4 1433Z_HUMAN  | YWHAZ          | P63104            | 14-3-3 protein zeta/delta (Protein kinase C inhibitor protein 1) (KCIP-1)                                                                                                                                                                                                                                                                                                                                                                                                                                                                                                                                                                                                                          | anti-apoptosis; melanosome; signal transduction; transcription factor binding                                                                                                                                                                                                                                                                                                                                                        | Cytoplasm. Melanosome.                                                                                                                                                             | 14-3-3 family           |
| 5 1A03_HUMAN   | HLA-A (HLAA)   | P04439            | HLA class I histocompatibility antigen, A-3 alpha chain (MHC class I antigen A*3)                                                                                                                                                                                                                                                                                                                                                                                                                                                                                                                                                                                                                  | MHC class I protein complex; MHC class I receptor activity; antigen processing and presentation of peptide antigen via MHC class I; immune response; integral to plasma membrane; interspecies interaction between organisms; protein binding                                                                                                                                                                                        | Membrane; Single-pass type I membrane protein.                                                                                                                                     | MHC class I family      |
| 6 1C07_HUMAN   | HLA-C (HLAC)   | P10321            | HLA class I histocompatibility antigen, Cw-7 alpha chain (MHC class I antigen Cw*7)                                                                                                                                                                                                                                                                                                                                                                                                                                                                                                                                                                                                                | MHC class I protein complex; antigen processing and presentation of peptide antigen via MHC class I; immune response; integral to membrane; interspecies interaction between organisms                                                                                                                                                                                                                                               | Membrane; Single-pass type I membrane protein.                                                                                                                                     | MHC class I family      |
| 7 A4_HUMAN     | APP (A4) (AD1) | P05067            | Amyloid beta A4 protein (Alzheimer disease amyloid protein) (ABPP) (APP1) (APP) (PreA4) (Cerebral vascular amyloid peptide) (CVAP) (Protease nexin-II) (PN-II) [Cleaved into: Soluble APP-alpha (S-APP-alpha); Soluble APP-beta (S-APP-beta); C99; Beta-amyloid protein 42 (Beta-APP42); Beta-amyloid protein 40 (Beta-APP40); C83; P3(42); P3(40); Gamma-secretase C-terminal fragment 59 (Gamma-CTF(59)) (Amyloid intracellular domain 59) (AICD-59) (AID(59)); Gamma-secretase C-terminal fragment 57 (Gamma-CTF(57)) (Amyloid intracellular domain 57) (AICD-57) (AID(57)); Gamma-secretase C-terminal fragment 50 (Gamma-CTF(50)) (Amyloid intracellular domain 50) (AICD-50) (AID(50)); C31] | Golgi apparatus; Notch signaling pathway; acetylcholine receptor binding; apoptosis; cell adhesion; cell surface; cellular copper ion homeostasis; coated pit; copper ion binding; endocytosis; extracellular region; heparin binding; identical protein binding; integral to plasma membrane; iron ion binding; neuromuscular process; platelet alpha granule lumen; serine-type endopeptidase inhibitor activity; zinc ion binding | Membrane; Single-pass type I membrane protein. Membrane , clathrin-coated pit.                                                                                                     | APP family              |
| 8 ABI1_HUMAN   | ABI1 (SSH3BP1) | Q8IZP0            | Abl interactor 1 (Abelson interactor 1) (Abi-1) (Spectrin SH3 domain-binding protein 1) (Eps8 SH3 domain-binding protein) (Eps8-binding protein) (e3B1) (Nap1-binding protein) (Nap1BP) (Abl-binding protein 4) (AbiBP4)                                                                                                                                                                                                                                                                                                                                                                                                                                                                           | cell junction; cytoskeletal protein binding; cytoskeleton; cytosol; endoplasmic reticulum; filopodium; growth cone; lamellipodium; negative regulation of cell proliferation; nucleus; peptidyl-tyrosine phosphorylation; soluble fraction; synapse; synaptosome; transmembrane receptor protein tyrosine kinase signaling pathway                                                                                                   | Cytoplasm. Nucleus. Cell projection , lamellipodium. Cell projection , filopodium. Cell projection , growth cone. Cell junction , synapse , synaptosome. Cytoplasm , cytoskeleton. | ABI family              |
| 9 ACOX1_HUMAN  | ACOX1 (ACOX)   | Q15067            | Peroxisomal acyl-coenzyme A oxidase 1 (AOX) (EC 1.3.3.6) (Palmitoyl-CoA oxidase) (Straight-chain acyl-CoA oxidase) (SCOX)                                                                                                                                                                                                                                                                                                                                                                                                                                                                                                                                                                          | FAD binding; acyl-CoA dehydrogenase activity; acyl-CoA oxidase activity; electron carrier activity; fatty acid beta-oxidation; generation of precursor metabolites and energy; oxidation reduction; prostaglandin metabolic process; protein N-terminus binding                                                                                                                                                                      | Peroxisome.                                                                                                                                                                        | Acyl-CoA oxidase family |
| 10 ACTB_HUMAN  | ACTB           | P60709            | Actin, cytoplasmic 1 (Beta-actin) [Cleaved into: Actin, cytoplasmic 1, N-terminally processed]                                                                                                                                                                                                                                                                                                                                                                                                                                                                                                                                                                                                     | ATP binding; NuA4 histone acetyltransferase complex; cell motion; histone methyltransferase complex; nitric-oxide synthase binding; sensory perception of sound; structural constituent of cytoskeleton                                                                                                                                                                                                                              | Cytoplasm , cytoskeleton.                                                                                                                                                          | Actin family            |
| 11 ACTN1_HUMAN | ACTN1          | P12814            | Alpha-actinin-1 (Alpha-actinin cytoskeletal isoform) (Non-muscle alpha-actinin-1) (F-actin cross-linking protein)                                                                                                                                                                                                                                                                                                                                                                                                                                                                                                                                                                                  | Z disc; actin binding; calcium ion binding; cytoskeleton; focal adhesion; focal adhesion formation; integrin binding; negative regulation of cell motion; nucleolus; pseudopodium; regulation of apoptosis; vinculin binding                                                                                                                                                                                                         | Cytoplasm , cytoskeleton. Cytoplasm , myofibril , sarcomere , Z-disk.                                                                                                              | Alpha-actinin family    |

| Entry name     | Gene names                | Uniprot Accession | Protein names                                                                                                                                                                                                                                                        | Gene Ontology                                                                                                                                                                                                                                                                                                                                                                                                                                                                                                                                                                                                                                                                                                                                   | Subcellular Localization                                                                                      | Protein family                                |
|----------------|---------------------------|-------------------|----------------------------------------------------------------------------------------------------------------------------------------------------------------------------------------------------------------------------------------------------------------------|-------------------------------------------------------------------------------------------------------------------------------------------------------------------------------------------------------------------------------------------------------------------------------------------------------------------------------------------------------------------------------------------------------------------------------------------------------------------------------------------------------------------------------------------------------------------------------------------------------------------------------------------------------------------------------------------------------------------------------------------------|---------------------------------------------------------------------------------------------------------------|-----------------------------------------------|
| 12 ACTN2_HUMAN | ACTN2                     | P35609            | Alpha-actinin-2 (Alpha-actinin skeletal muscle isoform 2) (F-actin cross-linking protein)                                                                                                                                                                            | FATZ 1 binding; Z disc; ZASP binding; actin binding; actin filament; calcium ion binding; dendritic spine; filopodium; focal adhesion; focal adhesion formation; identical protein binding; integrin binding; microspike assembly; nucleolus; protein dimerization activity; protein homotetramerization; pseudopodium; regulation of apoptosis; structural constituent of muscle; titin Z domain binding; titin binding                                                                                                                                                                                                                                                                                                                        | Cytoplasm , myofibril , sarcomere , Z-disk.                                                                   | Alpha-actinin family                          |
| 13 ACTN4_HUMAN | ACTN4                     | O43707            | Alpha-actinin-4 (Non-muscle alpha-actinin 4) (F-actin cross-linking protein)                                                                                                                                                                                         | actin filament binding; calcium ion binding; integrin binding; nucleolus; nucleoside binding; perinuclear region of cytoplasm; positive regulation of cell motion; positive regulation of sodium:hydrogen antiporter activity; protein complex; protein homodimerization activity; pseudopodium; regulation of apoptosis                                                                                                                                                                                                                                                                                                                                                                                                                        | Nucleus. Cytoplasm.                                                                                           | Alpha-actinin family                          |
| 14 ACTS_HUMAN  | ACTA1 (ACTA)              | P68133            | Actin, alpha skeletal muscle (Alpha-actin-1)                                                                                                                                                                                                                         | ADP binding; ATP binding; actin filament; muscle contraction; muscle thin filament assembly; myosin binding; skeletal muscle fiber development; stress fiber; striated muscle thin filament; structural constituent of cytoskeleton                                                                                                                                                                                                                                                                                                                                                                                                                                                                                                             | Cytoplasm , cytoskeleton.                                                                                     | Actin family                                  |
| 15 ACTZ_HUMAN  | ACTR1A (CTRNI)            | P61163            | Alpha-centractin (Centractin) (Centrosome-associated actin homolog) (Actin-RPV) (ARP1)                                                                                                                                                                               | ATP binding; centrosome; dynactin complex; protein binding; vesicle-mediated transport                                                                                                                                                                                                                                                                                                                                                                                                                                                                                                                                                                                                                                                          | Cytoplasm , cytoskeleton. Centrosome.                                                                         | Actin family, ARP1 subfamily                  |
| 16 ADA10_HUMAN | ADAM10 (KUZ) (MADM)       | O14672            | Disintegrin and metalloproteinase domain-containing protein 10 (ADAM 10) (EC 3.4.24.81) (Mammalian disintegrin-metalloprotease) (Kuzbanian protein homolog) (CDw156) (CD antigen CD156c)                                                                             | Golgi-associated vesicle; Notch signaling pathway; PMA-inducible membrane protein ectodomain proteolysis; SH3 domain binding; cell surface; cell-cell signaling; constitutive protein ectodomain proteolysis; endomembrane system; in utero embryonic development; integral to membrane; integrin binding; integrin-mediated signaling pathway; metalloendopeptidase activity; monocyte activation; negative regulation of cell adhesion; nucleus; plasma membrane; positive regulation of T cell chemotaxis; positive regulation of cell growth; positive regulation of cell proliferation; protein amino acid phosphorylation; protein homodimerization activity; protein kinase binding; response to tumor necrosis factor; zinc ion binding | Cell membrane; Single-pass type I membrane protein. Endomembrane system; Single-pass type I membrane protein. |                                               |
| 17 ADT1_HUMAN  | SLC25A4 (ANT1)            | P12235            | ADP/ATP translocase 1 (Adenine nucleotide translocator 1) (ANT 1) (ADP,ATP carrier protein 1) (Solute carrier family 25 member 4) (ADP,ATP carrier protein, heart/skeletal muscle isoform T1)                                                                        | adenine transmembrane transporter activity; generation of precursor metabolites and energy; integral to plasma membrane; interspecies interaction between organisms; mitochondrial genome maintenance; mitochondrial inner membrane; protein binding                                                                                                                                                                                                                                                                                                                                                                                                                                                                                            | Mitochondrion inner membrane; Multi-pass membrane protein.                                                    | Mitochondrial carrier family                  |
| 18 ALDOA_HUMAN | ALDOA (ALDA)              | P04075            | Fructose-bisphosphate aldolase A (EC 4.1.2.13) (Muscle-type aldolase) (Lung cancer antigen NY-LU-1)                                                                                                                                                                  | ATP biosynthetic process; I band; actin binding; actin cytoskeleton; actin filament organization; extracellular vesicular exosome; fructose 1,6-bisphosphate metabolic process; fructose binding; fructose-bisphosphate aldolase activity; glycolysis; identical protein binding; muscle maintenance; nucleus; regulation of cell shape; striated muscle contraction; tubulin binding                                                                                                                                                                                                                                                                                                                                                           |                                                                                                               | Class I fructose-bisphosphate aldolase family |
| 19 ANXA5_HUMAN | ANXA5 (ANX5) (ENX2) (PP4) | P08758            | Annexin A5 (Annexin-5) (Annexin V) (Lipocortin V) (Endonexin II) (Calphobindin I) (CBP-I) (Placental anticoagulant protein I) (PAP-I) (Placental anticoagulant protein 4) (PP4) (Thromboplastin inhibitor) (Vascular anticoagulant-alpha) (VAC-alpha) (Anchorin CII) | anti-apoptosis; blood coagulation; calcium ion binding; calcium-dependent phospholipid binding; cytoplasm; negative regulation of coagulation; phospholipase inhibitor activity; protein binding; signal transduction                                                                                                                                                                                                                                                                                                                                                                                                                                                                                                                           |                                                                                                               | Annexin family                                |

| Entry name | Gene names                                | Uniprot Accession | Protein names                                                                                                                                                                                                                                                  | Gene Ontology                                                                                                                                                                                                                                                                                                                                                                                                                                                                           | Subcellular Localization                                                                                                                                                  | Protein family                                              |
|------------|-------------------------------------------|-------------------|----------------------------------------------------------------------------------------------------------------------------------------------------------------------------------------------------------------------------------------------------------------|-----------------------------------------------------------------------------------------------------------------------------------------------------------------------------------------------------------------------------------------------------------------------------------------------------------------------------------------------------------------------------------------------------------------------------------------------------------------------------------------|---------------------------------------------------------------------------------------------------------------------------------------------------------------------------|-------------------------------------------------------------|
| 20         | APIG1_HUMAN<br>APIG1 (ADTG)<br>(CLAPG1)   | O43747            | AP-1 complex subunit gamma-1 (Adapter-related protein complex 1 subunit gamma-1) (Adaptor protein complex AP-1 subunit gamma-1) (Golgi adaptor HA1/AP1 adaptin subunit gamma-1) (Gamma1-adaptin) (Clathrin assembly protein complex 1 gamma-1 large chain)     | Golgi apparatus part; clathrin adaptor complex; clathrin coated vesicle membrane; cytosol; endocytosis; intracellular protein transport; protein binding; protein transporter activity                                                                                                                                                                                                                                                                                                  | Golgi apparatus. Cytoplasmic vesicle, clathrin-coated vesicle membrane; Peripheral membrane protein; Cytoplasmic side.                                                    | Adaptor complexes large subunit family                      |
| 21         | ARF1_HUMAN<br>ARF1                        | P84077            | ADP-ribosylation factor 1                                                                                                                                                                                                                                      | COPI coating of Golgi vesicle; GTP binding; GTPase activity; Golgi membrane; cytosol; plasma membrane; protein binding; protein transport; receptor signaling protein activity; retrograde vesicle-mediated transport, Golgi to ER; small GTPase mediated signal transduction                                                                                                                                                                                                           | Golgi apparatus.                                                                                                                                                          | Small GTPase superfamily, Arf family                        |
| 22         | ARMET_HUMAN<br>ARMET (ARP)                | P55145            | Protein ARMET (Mesencephalic astrocyte-derived neurotrophic factor) (MANF) (Arginine-rich protein)                                                                                                                                                             | extracellular region; growth factor activity                                                                                                                                                                                                                                                                                                                                                                                                                                            | Secreted.                                                                                                                                                                 | ARMET family                                                |
| 23         | ARP2_HUMAN<br>ACTR2 (ARP2)                | P61160            | Actin-related protein 2 (Actin-like protein 2)                                                                                                                                                                                                                 | ATP binding; Arp2/3 protein complex; actin binding; cell motion; cell projection; cytoplasm                                                                                                                                                                                                                                                                                                                                                                                             | Cytoplasm, cytoskeleton. Cell projection.                                                                                                                                 | Actin family, ARP2 subfamily                                |
| 24         | ARP3_HUMAN<br>ACTR3 (ARP3)                | P61158            | Actin-related protein 3 (Actin-like protein 3)                                                                                                                                                                                                                 | ATP binding; Arp2/3 protein complex; actin binding; cell motion; cytoplasm; regulation of actin filament polymerization                                                                                                                                                                                                                                                                                                                                                                 | Cytoplasm, cytoskeleton. Cell projection.                                                                                                                                 | Actin family, ARP3 subfamily                                |
| 25         | ARPC2_HUMAN<br>ARPC2 (ARC34)<br>(PRO2446) | O15144            | Actin-related protein 2/3 complex subunit 2 (Arp2/3 complex 34 kDa subunit) (p34-ARC)                                                                                                                                                                          | Arp2/3 protein complex; actin binding; cell motion; cell projection; cytoplasm; structural constituent of cytoskeleton                                                                                                                                                                                                                                                                                                                                                                  | Cytoplasm, cytoskeleton. Cell projection.                                                                                                                                 | ARPC2 family                                                |
| 26         | ARPC5_HUMAN<br>ARPC5 (ARC16)              | O15511            | Actin-related protein 2/3 complex subunit 5 (Arp2/3 complex 16 kDa subunit) (p16-ARC)                                                                                                                                                                          | Arp2/3 protein complex; actin binding; actin cytoskeleton organization; cell motion; cell projection; cytoplasm; regulation of actin filament polymerization; structural constituent of cytoskeleton                                                                                                                                                                                                                                                                                    | Cytoplasm, cytoskeleton. Cell projection.                                                                                                                                 | ARPC5 family                                                |
| 27         | AT2A1_HUMAN<br>ATP2A1                     | O14983            | Sarcoplasmic/endoplasmic reticulum calcium ATPase 1 (SERCA1) (EC 3.6.3.8) (Calcium pump 1) (Calcium-transporting ATPase sarcoplasmic reticulum type, fast twitch skeletal muscle isoform) (SR Ca(2+)-ATPase 1) (Endoplasmic reticulum class 1/2 Ca(2+) ATPase) | ATP binding; ATP biosynthetic process; calcium ion binding; calcium ion transport; calcium-transporting ATPase activity; integral to membrane; magnesium ion binding; positive regulation of fast-twitch skeletal muscle fiber contraction; protein binding; sarcoplasmic reticulum membrane                                                                                                                                                                                            | Endoplasmic reticulum membrane; Multi-pass membrane protein. Sarcoplasmic reticulum membrane; Multi-pass membrane protein.                                                | Cation transport ATPase (P-type) family, Type IIA subfamily |
| 28         | AT2A2_HUMAN<br>ATP2A2 (ATP2B)             | P16615            | Sarcoplasmic/endoplasmic reticulum calcium ATPase 2 (SERCA2) (EC 3.6.3.8) (Calcium pump 2) (Calcium-transporting ATPase sarcoplasmic reticulum type, slow twitch skeletal muscle isoform) (SR Ca(2+)-ATPase 2) (Endoplasmic reticulum class 1/2 Ca(2+) ATPase) | ATP binding; ATP biosynthetic process; S100 alpha binding; calcium ion binding; calcium-transporting ATPase activity; cell adhesion; epidermis development; integral to plasma membrane; magnesium ion binding; microsome; sarcoplasmic reticulum calcium ion transport; sarcoplasmic reticulum membrane                                                                                                                                                                                | Endoplasmic reticulum membrane; Multi-pass membrane protein. Sarcoplasmic reticulum membrane; Multi-pass membrane protein.                                                | Cation transport ATPase (P-type) family, Type IIA subfamily |
| 29         | AT2A3_HUMAN<br>ATP2A3                     | Q93084            | Sarcoplasmic/endoplasmic reticulum calcium ATPase 3 (SERCA3) (EC 3.6.3.8) (Calcium pump 3) (SR Ca(2+)-ATPase 3)                                                                                                                                                | ATP binding; ATP biosynthetic process; calcium ion binding; calcium ion transport; calcium-transporting ATPase activity; integral to membrane; magnesium ion binding; nuclear membrane; protein binding; sarcoplasmic reticulum membrane                                                                                                                                                                                                                                                | Nucleus membrane; Multi-pass membrane protein. Endoplasmic reticulum membrane; Multi-pass membrane protein. Sarcoplasmic reticulum membrane; Multi-pass membrane protein. | Cation transport ATPase (P-type) family, Type IIA subfamily |
| 30         | ATD3A_HUMAN<br>ATAD3A                     | Q9NVI7            | ATPase family AAA domain-containing protein 3A                                                                                                                                                                                                                 | ATP binding; nucleoside-triphosphatase activity; protein binding                                                                                                                                                                                                                                                                                                                                                                                                                        |                                                                                                                                                                           | AAA ATPase family                                           |
| 31         | ATP5H_HUMAN<br>ATP5H (My032)              | O75947            | ATP synthase subunit d, mitochondrial                                                                                                                                                                                                                          | ATP synthesis coupled proton transport; hydrogen ion transmembrane transporter activity; mitochondrial proton-transporting ATP synthase complex, coupling factor F(o)                                                                                                                                                                                                                                                                                                                   | Mitochondrion. Mitochondrion inner membrane.                                                                                                                              | ATPase d subunit family                                     |
| 32         | ATPB_HUMAN<br>ATP5B (ATPMB)<br>(ATPSB)    | P06576            | ATP synthase subunit beta, mitochondrial (EC 3.6.3.14)                                                                                                                                                                                                         | ATP binding; ATP synthesis coupled proton transport; MHC class I protein binding; angiogenesis; cell surface; eukaryotic cell surface binding; hydrogen ion transporting ATP synthase activity, rotational mechanism; hydrogen-exporting ATPase activity, phosphorylative mechanism; mitochondrial nucleoid; mitochondrial proton-transporting ATP synthase, catalytic core; plasma membrane; proton-transporting ATPase activity, rotational mechanism; regulation of intracellular pH | Mitochondrion. Mitochondrion inner membrane.                                                                                                                              | ATPase alpha/beta chains family                             |

| Entry name     | Gene names                                                                            | Uniprot Accession | Protein names                                                                                                                                                                                                                                            | Gene Ontology                                                                                                                                                                                                                                                                                                                                                                                                                                                                                                                                                                                                                                                  | Subcellular Localization                                                                                                              | Protein family                               |
|----------------|---------------------------------------------------------------------------------------|-------------------|----------------------------------------------------------------------------------------------------------------------------------------------------------------------------------------------------------------------------------------------------------|----------------------------------------------------------------------------------------------------------------------------------------------------------------------------------------------------------------------------------------------------------------------------------------------------------------------------------------------------------------------------------------------------------------------------------------------------------------------------------------------------------------------------------------------------------------------------------------------------------------------------------------------------------------|---------------------------------------------------------------------------------------------------------------------------------------|----------------------------------------------|
| 33 ATPK_HUMAN  | ATP5J2 (ATP5JL)                                                                       | P56134            | ATP synthase subunit f, mitochondrial                                                                                                                                                                                                                    | ATP biosynthetic process; hydrogen ion transmembrane transporter activity; mitochondrial proton-transporting ATP synthase complex; proton transport; proton-transporting ATP synthase complex, coupling factor F(o)                                                                                                                                                                                                                                                                                                                                                                                                                                            | Mitochondrion. Mitochondrion inner membrane.                                                                                          | ATPase F chain family                        |
| 34 ATPO_HUMAN  | ATP5O (ATPO)                                                                          | P48047            | ATP synthase subunit O, mitochondrial (Oligomycin sensitivity conferral protein) (OSCP)                                                                                                                                                                  | ATP catabolic process; drug binding; hydrogen ion transporting ATP synthase activity, rotational mechanism; mitochondrial ATP synthesis coupled proton transport; mitochondrial proton-transporting ATP synthase complex; plasma membrane; proton-transporting ATP synthase complex, catalytic core F(1); proton-transporting ATPase activity, rotational mechanism                                                                                                                                                                                                                                                                                            | Mitochondrion. Mitochondrion inner membrane.                                                                                          | ATPase delta chain family                    |
| 35 B2MG_HUMAN  | B2M (CDABP0092) (HDCMA22P)                                                            | P61769            | Beta-2-microglobulin [Cleaved into: Beta-2-microglobulin form pI 5.3]                                                                                                                                                                                    | Golgi membrane; MHC class I protein complex; antigen processing and presentation of peptide antigen via MHC class I; early endosome membrane; extracellular region; immune response; protein binding                                                                                                                                                                                                                                                                                                                                                                                                                                                           | Secreted.                                                                                                                             | Beta-2-microglobulin family                  |
| 36 BET1_HUMAN  | BET1                                                                                  | O15155            | BET1 homolog (hBET1) (Golgi vesicular membrane-trafficking protein p18)                                                                                                                                                                                  | ER to Golgi vesicle-mediated transport; Golgi membrane; endoplasmic reticulum membrane; integral to membrane; protein binding; protein transport                                                                                                                                                                                                                                                                                                                                                                                                                                                                                                               | Golgi apparatus membrane; Single-pass type IV membrane protein. Endoplasmic reticulum membrane; Single-pass type IV membrane protein. | BET1 family                                  |
| 37 C109A_HUMAN | CCDC109A (C10orf42)                                                                   | Q8NE86            | Coiled-coil domain-containing protein 109A                                                                                                                                                                                                               | integral to membrane                                                                                                                                                                                                                                                                                                                                                                                                                                                                                                                                                                                                                                           | Membrane; Multi-pass membrane protein.                                                                                                | CCDC109 family                               |
| 38 CALM_HUMAN  | CALM1 (CALM) (CAM) (CAM1); CALM2 (CAM2) (CAMB); CALM3 (CALML2) (CAM3) (CAMC) (CAMIII) | P62158            | Calmodulin (CaM)                                                                                                                                                                                                                                         | G-protein coupled receptor protein signaling pathway; N-terminal myristoylation domain binding; calcium ion binding; centrosome; cytosol; negative regulation of ryanodine-sensitive calcium-release channel activity; plasma membrane; positive regulation of ryanodine-sensitive calcium-release channel activity; protein domain specific binding; regulation of cytokinesis; regulation of release of sequestered calcium ion into cytosol by sarcoplasmic reticulum; response to calcium ion; spindle microtubule; spindle pole; titin binding                                                                                                            | Spindle.                                                                                                                              | Calmodulin family                            |
| 39 CALX_HUMAN  | CANX                                                                                  | P27824            | Calnexin (Major histocompatibility complex class I antigen-binding protein p88) (p90) (IP90)                                                                                                                                                             | calcium ion binding; endoplasmic reticulum membrane; integral to membrane; melanosome; protein folding; protein secretion; sugar binding; unfolded protein binding                                                                                                                                                                                                                                                                                                                                                                                                                                                                                             | Endoplasmic reticulum membrane; Single-pass type I membrane protein. Melanosome.                                                      | Calreticulin family                          |
| 40 CAN1_HUMAN  | CAPN1 (CANPL1) (PIG30)                                                                | P07384            | Calpain-1 catalytic subunit (EC 3.4.22.52) (Calpain-1 large subunit) (Calcium-activated neutral proteinase 1) (CANP 1) (Calpain mu-type) (muCANP) (Micromolar-calpain) (Cell proliferation-inducing gene 30 protein)                                     | calcium ion binding; calcium-dependent cysteine-type endopeptidase activity; cytoplasm; plasma membrane; positive regulation of cell proliferation; protein binding; proteolysis                                                                                                                                                                                                                                                                                                                                                                                                                                                                               | Cytoplasm. Cell membrane.                                                                                                             | Peptidase C2 family                          |
| 41 CAZA1_HUMAN | CAPZA1                                                                                | P52907            | F-actin-capping protein subunit alpha-1 (CapZ alpha-1)                                                                                                                                                                                                   | F-actin capping protein complex; actin binding; actin cytoskeleton organization; barbed-end actin filament capping; cell motion; protein complex assembly                                                                                                                                                                                                                                                                                                                                                                                                                                                                                                      |                                                                                                                                       | F-actin-capping protein alpha subunit family |
| 42 CD36_HUMAN  | CD36 (GP3B) (GP4)                                                                     | P16671            | Platelet glycoprotein 4 (Platelet glycoprotein IV) (GPIV) (Glycoprotein IIIb) (GPIIIB) (Leukocyte differentiation antigen CD36) (PAS IV) (PAS-4) (Platelet collagen receptor) (Fatty acid translocase) (FAT) (Thrombospondin receptor) (CD antigen CD36) | Golgi apparatus; blood coagulation; cGMP-mediated signaling; cell adhesion; cell surface; cholesterol transport; integral to plasma membrane; lipid binding; lipid metabolic process; lipid storage; lipoprotein catabolic process; lipoprotein particle clearance; lipoprotein transport; low-density lipoprotein receptor activity; membrane fraction; nitric oxide mediated signal transduction; plasma membrane long-chain fatty acid transport; platelet alpha granule membrane; positive regulation of cell-matrix adhesion; positive regulation of foam cell differentiation; thrombospondin receptor activity; transforming growth factor beta binding | Membrane; Multi-pass membrane protein.                                                                                                | CD36 family                                  |

| Entry name     | Gene names                                   | Uniprot Accession | Protein names                                                                                                                                                                                                                                                                                                                                                                                                                                                                                                                                                                                                                                            | Gene Ontology                                                                                                                                                                                                                                                                                           | Subcellular Localization                                                                                                                                                 | Protein family                                                                 |
|----------------|----------------------------------------------|-------------------|----------------------------------------------------------------------------------------------------------------------------------------------------------------------------------------------------------------------------------------------------------------------------------------------------------------------------------------------------------------------------------------------------------------------------------------------------------------------------------------------------------------------------------------------------------------------------------------------------------------------------------------------------------|---------------------------------------------------------------------------------------------------------------------------------------------------------------------------------------------------------------------------------------------------------------------------------------------------------|--------------------------------------------------------------------------------------------------------------------------------------------------------------------------|--------------------------------------------------------------------------------|
| 43 CD68_HUMAN  | CD68                                         | P34810            | Macrosialin (Gp110) (CD antigen CD68)                                                                                                                                                                                                                                                                                                                                                                                                                                                                                                                                                                                                                    | endosome; integral to membrane; lysosomal membrane; membrane fraction; plasma membrane                                                                                                                                                                                                                  | Cell membrane; Single-pass type I membrane protein. Endosome membrane; Single-pass type I membrane protein. Lysosome membrane; Single-pass type I membrane protein.      | LAMP family                                                                    |
| 44 CD9_HUMAN   | CD9 (MIC3) (TSPAN29) (GIG2)                  | P21926            | CD9 antigen (p24) (Leukocyte antigen MIC3) (Motility-related protein) (MRP-1) (Tetraspanin-29) (Tspan-29) (5H9 antigen) (Cell growth-inhibiting gene 2 protein) (CD antigen CD9)                                                                                                                                                                                                                                                                                                                                                                                                                                                                         | cell adhesion; cell motion; fusion of sperm to egg plasma membrane; integral to plasma membrane; paranodal junction assembly; platelet activation; platelet alpha granule membrane; protein binding                                                                                                     | Membrane; Multi-pass membrane protein.                                                                                                                                   | Tetraspanin (TM4SF) family                                                     |
| 45 CK059_HUMAN | C11orf59 (PP7157)                            | Q6IAA8            | UPF0404 protein C11orf59                                                                                                                                                                                                                                                                                                                                                                                                                                                                                                                                                                                                                                 |                                                                                                                                                                                                                                                                                                         |                                                                                                                                                                          | UPF0404 family                                                                 |
| 46 CLH1_HUMAN  | CLTC (CLH17) (CLTCL2) (KIAA0034)             | Q00610            | Clathrin heavy chain 1 (CLH-17)                                                                                                                                                                                                                                                                                                                                                                                                                                                                                                                                                                                                                          | clathrin coat of coated pit; clathrin coat of trans-Golgi network vesicle; intracellular protein transport; melanosome; protein binding; structural molecule activity; vesicle-mediated transport                                                                                                       | Cytoplasmic vesicle membrane; Peripheral membrane protein; Cytoplasmic side. Membrane , coated pit; Peripheral membrane protein; Cytoplasmic side. Melanosome. Secreted. | Clathrin heavy chain family                                                    |
| 47 CLUS_HUMAN  | CLU (APOJ) (CLI) (KUB1) (AAG4)               | P10909            | Clusterin (Complement-associated protein SP-40,40) (Complement cytolytic inhibitor) (CLI) (NA1/NA2) (Apolipoprotein J) (Apo-J) (Testosterone-repressed prostate message 2) (TRPM-2) (Ku70-binding protein 1) (Aging-associated gene 4 protein) [Cleaved into: Clusterin beta chain (ApoJalpha) (Complement cytolytic inhibitor a chain); Clusterin alpha chain (ApoJbeta) (Complement cytolytic inhibitor b chain)]                                                                                                                                                                                                                                      | apoptosis; complement activation, classical pathway; innate immune response; lipid metabolic process; protein binding; reverse cholesterol transport; spherical high-density lipoprotein particle                                                                                                       |                                                                                                                                                                          | Clusterin family                                                               |
| 48 CMC2_HUMAN  | SLC25A13 (ARALAR2)                           | Q9UJS0            | Calcium-binding mitochondrial carrier protein Aralar2 (Mitochondrial aspartate glutamate carrier 2) (Solute carrier family 25 member 13) (Citrin)                                                                                                                                                                                                                                                                                                                                                                                                                                                                                                        | ATP biosynthetic process; L-aspartate transmembrane transporter activity; L-glutamate transmembrane transporter activity; L-glutamate transport; aspartate transport; calcium ion binding; integral to plasma membrane; malate-aspartate shuttle; mitochondrial inner membrane; response to calcium ion | Mitochondrion inner membrane; Multi-pass membrane protein.                                                                                                               | Mitochondrial carrier family                                                   |
| 49 COF1_HUMAN  | CFL1 (CFL)                                   | P23528            | Cofilin-1 (Cofilin, non-muscle isoform) (18 kDa phosphoprotein) (p18)                                                                                                                                                                                                                                                                                                                                                                                                                                                                                                                                                                                    | Rho protein signal transduction; actin binding; anti-apoptosis; nuclear matrix                                                                                                                                                                                                                          | Nucleus matrix. Cytoplasm , cytoskeleton.                                                                                                                                | Actin-binding proteins ADF family                                              |
| 50 COR1B_HUMAN | CORO1B                                       | Q9BR76            | Coronin-1B (Coronin-2)                                                                                                                                                                                                                                                                                                                                                                                                                                                                                                                                                                                                                                   | actin binding; cytoplasm; cytoskeleton                                                                                                                                                                                                                                                                  | Cytoplasm , cytoskeleton.                                                                                                                                                | WD repeat coronin family                                                       |
| 51 CPNS1_HUMAN | CAPNS1 (CAPN4) (CAPNS)                       | P04632            | Calpain small subunit 1 (CSS1) (Calcium-dependent protease small subunit 1) (Calcium-dependent protease small subunit) (CDPS) (Calpain regulatory subunit) (Calcium-activated neutral proteinase small subunit) (CANP small subunit)                                                                                                                                                                                                                                                                                                                                                                                                                     | calcium ion binding; calcium-dependent cysteine-type endopeptidase activity; cytoplasm; nucleus; plasma membrane; positive regulation of cell proliferation; protein binding                                                                                                                            | Cytoplasm. Cell membrane.                                                                                                                                                |                                                                                |
| 52 CSRP1_HUMAN | CSRP1 (CSRP) (CYRP)                          | P21291            | Cysteine and glycine-rich protein 1 (Cysteine-rich protein 1) (CRP1) (CRP)                                                                                                                                                                                                                                                                                                                                                                                                                                                                                                                                                                               | nucleus; zinc ion binding                                                                                                                                                                                                                                                                               | Nucleus.                                                                                                                                                                 |                                                                                |
| 53 CX7A2_HUMAN | COX7A2 (COX7AL)                              | P14406            | Cytochrome c oxidase polypeptide 7A2, mitochondrial (Cytochrome c oxidase polypeptide VIIa-liver/heart) (Cytochrome c oxidase subunit VIIa-L) (VIIaL)                                                                                                                                                                                                                                                                                                                                                                                                                                                                                                    | cytochrome-c oxidase activity; electron carrier activity; mitochondrial respiratory chain                                                                                                                                                                                                               | Mitochondrion inner membrane.                                                                                                                                            | Cytochrome c oxidase VIIa family                                               |
| 54 CXCL7_HUMAN | PPBP (CTAP3) (CXCL7) (SCYB7) (TGB1) (THBGB1) | P02775            | Platelet basic protein (PBP) (C-X-C motif chemokine 7) (Small-inducible cytokine B7) (Leukocyte-derived growth factor) (LDGF) (Macrophage-derived growth factor) (MDGF) [Cleaved into: Connective tissue-activating peptide III (CTAP-III) (Low-affinity platelet factor IV) (LA-PF4); TC-2; Connective tissue-activating peptide III(1-81) (CTAP-III(1-81)); Beta-thromboglobulin (Beta-TG); Neutrophil-activating peptide 2(74) (NAP-2(74)); Neutrophil-activating peptide 2(73) (NAP-2(73)); Neutrophil-activating peptide 2 (NAP-2); TC-1; Neutrophil-activating peptide 2(1-66) (NAP-2(1-66)); Neutrophil-activating peptide 2(1-63) (NAP-2(1-63))] | cell proliferation; chemokine activity; chemotaxis; defense response to bacterium; extracellular space; glucose transmembrane transporter activity; glucose transport; growth factor activity; immune response; platelet alpha granule lumen                                                            | Secreted.                                                                                                                                                                | Intercrine alpha (chemokine Cx) family                                         |
| 55 CYFP1_HUMAN | CYFIP1 (KIAA0068)                            | Q7L576            | Cytoplasmic FMR1-interacting protein 1 (Specifically Rac1-associated protein 1) (Sra-1) (p140sra-1)                                                                                                                                                                                                                                                                                                                                                                                                                                                                                                                                                      | Rac GTPase binding; actin filament binding; axon extension; cell junction; lamellipodium; lamellipodium assembly; perinuclear region of cytoplasm; regulation of cell shape; ruffle; ruffle organization; synapse; synaptosome                                                                          | Cytoplasm , perinuclear region. Cell projection , lamellipodium. Cell projection , ruffle. Cell junction , synapse , synaptosome.                                        | CYFIP family                                                                   |
| 56 DCLK1_HUMAN | DCLK1 (DCAMKL1) (DCDC3A) (KIAA0369)          | O15075            | Serine/threonine-protein kinase DCLK1 (EC 2.7.11.1) (Doublecortin-like and CAM kinase-like 1) (Doublecortin-like kinase 1)                                                                                                                                                                                                                                                                                                                                                                                                                                                                                                                               | ATP binding; cell differentiation; central nervous system development; endosome transport; integral to plasma membrane; intracellular signaling cascade; protein amino acid phosphorylation; protein binding; protein serine/threonine kinase activity; receptor signaling protein activity             |                                                                                                                                                                          | Protein kinase superfamily, CAMK Ser/Thr protein kinase family, CaMK subfamily |

| Entry name     | Gene names           | Uniprot Accession | Protein names                                                                                                                                             | Gene Ontology                                                                                                                                                                                                                                                                                                                                                                                                 | Subcellular Localization                                                                                                                                                | Protein family                                                                           |
|----------------|----------------------|-------------------|-----------------------------------------------------------------------------------------------------------------------------------------------------------|---------------------------------------------------------------------------------------------------------------------------------------------------------------------------------------------------------------------------------------------------------------------------------------------------------------------------------------------------------------------------------------------------------------|-------------------------------------------------------------------------------------------------------------------------------------------------------------------------|------------------------------------------------------------------------------------------|
| 57 DECR_HUMAN  | DECR1 (DECR)         | Q16698            | 2,4-dienoyl-CoA reductase, mitochondrial (EC 1.3.1.34) (2,4-dienoyl-CoA reductase [NADPH]) (4-enoyl-CoA reductase [NADPH])                                | 2,4-dienoyl-CoA reductase (NADPH) activity; NADPH binding; fatty acid beta-oxidation; mitochondrion; oxidation reduction; protein homotetramerization                                                                                                                                                                                                                                                         | Mitochondrion.                                                                                                                                                          | Short-chain dehydrogenase s/reductases (SDR) family, 2,4-dienoyl-CoA reductase subfamily |
| 58 DHB12_HUMAN | HSD17B12             | Q53GQ0            | Estradiol 17-beta-dehydrogenase 12 (EC 1.1.1.62) (17-beta-hydroxysteroid dehydrogenase 12) (17-beta-HSD 12) (3-ketoacyl-CoA reductase) (KAR) (EC 1.3.1.-) | endoplasmic reticulum membrane; estradiol 17-beta-dehydrogenase activity; integral to membrane; oxidation reduction; steroid biosynthetic process                                                                                                                                                                                                                                                             | Endoplasmic reticulum membrane; Multi-pass membrane protein.                                                                                                            | Short-chain dehydrogenase s/reductases (SDR) family, 17-beta-HSD 3 subfamily             |
| 59 DHSA_HUMAN  | SDHA (SDH2) (SDHF)   | P31040            | Succinate dehydrogenase [ubiquinone] flavoprotein subunit, mitochondrial (EC 1.3.5.1) (Flavoprotein subunit of complex II) (Fp)                           | FAD binding; electron carrier activity; mitochondrial respiratory chain complex II; nervous system development; protein binding; respiratory electron transport chain; succinate dehydrogenase (ubiquinone) activity; succinate metabolic process; transport; tricarboxylic acid cycle                                                                                                                        | Mitochondrion inner membrane; Peripheral membrane protein; Matrix side.                                                                                                 | FAD-dependent oxidoreductase 2 family, FRD/SDH subfamily                                 |
| 60 EHD3_HUMAN  | EHD3 (EHD2) (PAST3)  | Q9NZN3            | EH domain-containing protein 3                                                                                                                            | ATP binding; GTP binding; GTPase activity; calcium ion binding; nucleic acid binding; nucleus; plasma membrane; recycling endosome membrane                                                                                                                                                                                                                                                                   | Cell membrane; Peripheral membrane protein; Cytoplasmic side. Endosome membrane; Peripheral membrane protein. Recycling endosome membrane; Peripheral membrane protein. |                                                                                          |
| 61 ESAM_HUMAN  | ESAM (UNQ220/PRO246) | Q96AP7            | Endothelial cell-selective adhesion molecule                                                                                                              | adherens junction; integral to membrane; protein binding; tight junction                                                                                                                                                                                                                                                                                                                                      | Cell junction , adherens junction. Cell junction , tight junction. Cell membrane; Single-pass type I membrane protein. Cytoplasm. Secreted.                             | Transglutaminase superfamily, Transglutaminase family                                    |
| 62 F13A_HUMAN  | F13A1 (F13A)         | P00488            | Coagulation factor XIII A chain (Coagulation factor XIIIa) (EC 2.3.2.13) (Protein-glutamine gamma-glutamyltransferase A chain) (Transglutaminase A chain) | acyltransferase activity; blood coagulation; calcium ion binding; cytoplasm; extracellular region; protein-glutamine gamma-glutamyltransferase activity                                                                                                                                                                                                                                                       | Cytoplasm. Cytoplasm. Nucleus. Nucleus. Cytoplasm , cytosol.                                                                                                            |                                                                                          |
| 63 FHL1_HUMAN  | FHL1 (SLIM1)         | Q13642            | Four and a half LIM domains protein 1 (FHL-1) (Skeletal muscle LIM-protein 1) (SLIM 1) (SLIM)                                                             | cell differentiation; cell growth; cytosol; muscle organ development; nucleus; organ morphogenesis; zinc ion binding                                                                                                                                                                                                                                                                                          | Cytoplasm. Cytoplasm. Nucleus. Nucleus. Cytoplasm , cytosol.                                                                                                            |                                                                                          |
| 64 FIBA_HUMAN  | FGA                  | P02671            | Fibrinogen alpha chain [Cleaved into: Fibrinopeptide A]                                                                                                   | eukaryotic cell surface binding; external side of plasma membrane; fibrinogen complex; platelet activation; platelet alpha granule lumen; protein binding, bridging; protein polymerization; receptor binding; response to calcium ion; signal transduction                                                                                                                                                   | Secreted.                                                                                                                                                               |                                                                                          |
| 65 FIBB_HUMAN  | FGB                  | P02675            | Fibrinogen beta chain [Cleaved into: Fibrinopeptide B]                                                                                                    | eukaryotic cell surface binding; external side of plasma membrane; fibrinogen complex; nucleus; platelet activation; platelet alpha granule lumen; protein binding, bridging; protein polymerization; receptor binding; response to calcium ion; signal transduction                                                                                                                                          | Secreted.                                                                                                                                                               |                                                                                          |
| 66 FIBG_HUMAN  | FGG (PRO2061)        | P02679            | Fibrinogen gamma chain                                                                                                                                    | calcium ion binding; eukaryotic cell surface binding; external side of plasma membrane; fibrinogen complex; platelet activation; platelet alpha granule lumen; protein binding, bridging; protein polymerization; receptor binding; response to calcium ion; signal transduction                                                                                                                              | Secreted.                                                                                                                                                               |                                                                                          |
| 67 FINC_HUMAN  | FN1 (FN)             | P02751            | Fibronectin (FN) (Cold-insoluble globulin) (CIG) [Cleaved into: Ugl-Y1; Ugl-Y2; Ugl-Y3]                                                                   | ER-Golgi intermediate compartment; acute-phase response; cell migration; collagen binding; extracellular matrix structural constituent; fibrinogen complex; heparin binding; peptide cross-linking; platelet alpha granule lumen; proteinaceous extracellular matrix; regulation of cell shape; substrate adhesion-dependent cell spreading; transmembrane receptor protein tyrosine kinase signaling pathway | Secreted , extracellular space , extracellular matrix.                                                                                                                  |                                                                                          |

| Entry name     | Gene names                             | Uniprot Accession | Protein names                                                                                                                        | Gene Ontology                                                                                                                                                                                                                                                                                                                                                                                                                                                                                                                                                                                                                                                                                                                                                                                                                  | Subcellular Localization                                                                                                                                                                | Protein family                                                       |
|----------------|----------------------------------------|-------------------|--------------------------------------------------------------------------------------------------------------------------------------|--------------------------------------------------------------------------------------------------------------------------------------------------------------------------------------------------------------------------------------------------------------------------------------------------------------------------------------------------------------------------------------------------------------------------------------------------------------------------------------------------------------------------------------------------------------------------------------------------------------------------------------------------------------------------------------------------------------------------------------------------------------------------------------------------------------------------------|-----------------------------------------------------------------------------------------------------------------------------------------------------------------------------------------|----------------------------------------------------------------------|
| 68 FLNA_HUMAN  | FLNA (FLN) (FLN1)                      | P21333            | Filamin-A (Alpha-filamin) (Filamin-1) (Endothelial actin-binding protein) (Actin-binding protein 280) (ABP-280) (Non-muscle filamin) | Fc-gamma receptor I complex binding; GTP-Ral binding; Rac GTPase binding; actin crosslink formation; actin cytoskeleton; actin cytoskeleton reorganization; actin filament binding; cell cortex; cytoplasmic sequestering of protein; establishment of protein localization; glycoprotein binding; inhibition of adenylate cyclase activity by dopamine receptor signaling pathway; negative regulation of protein catabolic process; negative regulation of transcription factor activity; nucleus; plasma membrane; positive regulation of I-kappaB kinase/NF-kappaB cascade; positive regulation of transcription factor import into nucleus; protein homodimerization activity; protein localization at cell surface; protein stabilization; receptor clustering; signal transducer activity; transcription factor binding | Cytoplasm , cell cortex. Cytoplasm , cytoskeleton.                                                                                                                                      | Filamin family                                                       |
| 69 FYN_HUMAN   | FYN                                    | P06241            | Proto-oncogene tyrosine-protein kinase Fyn (EC 2.7.10.2) (p59-Fyn) (Protooncogene Syn) (SLK)                                         | ATP binding; T cell receptor signaling pathway; calcium ion transport; cytosol; endosome; feeding behavior; glycoprotein binding; identical protein binding; interspecies interaction between organisms; learning; manganese ion binding; multicellular organismal development; non-membrane spanning protein tyrosine kinase activity; plasma membrane; protein amino acid phosphorylation; protein kinase cascade                                                                                                                                                                                                                                                                                                                                                                                                            | Cell membrane.                                                                                                                                                                          | Protein kinase superfamily, Tyr protein kinase family, SRC subfamily |
| 70 G3P_HUMAN   | GAPDH (GAPD) (CDABP0047) (OK/SW-cl.12) | P04406            | Glyceraldehyde-3-phosphate dehydrogenase (GAPDH) (EC 1.2.1.12)                                                                       | NAD or NADH binding; glyceraldehyde-3-phosphate dehydrogenase (phosphorylating) activity; glycolysis; membrane; oxidation reduction; perinuclear region of cytoplasm; protein binding                                                                                                                                                                                                                                                                                                                                                                                                                                                                                                                                                                                                                                          | Cytoplasm. Cytoplasm , perinuclear region. Membrane.                                                                                                                                    | Glyceraldehyde-3-phosphate dehydrogenase family                      |
| 71 G6B_HUMAN   | G6B (C6orf25)                          | O95866            | Protein G6b                                                                                                                          | Golgi apparatus; endoplasmic reticulum; heparin binding; integral to membrane; plasma membrane; receptor activity                                                                                                                                                                                                                                                                                                                                                                                                                                                                                                                                                                                                                                                                                                              | Endoplasmic reticulum. Golgi apparatus. Endoplasmic reticulum. Golgi apparatus. Cell membrane; Single-pass type I membrane protein. Cell membrane; Single-pass type I membrane protein. |                                                                      |
| 72 G6PD_HUMAN  | G6PD                                   | P11413            | Glucose-6-phosphate 1-dehydrogenase (G6PD) (EC 1.1.1.49)                                                                             | NADP or NADPH binding; cellular response to oxidative stress; centrosome; cholesterol biosynthetic process; cytokine production; cytosol; erythrocyte maturation; glucose 6-phosphate utilization; glucose binding; glucose-6-phosphate dehydrogenase activity; glutathione metabolic process; internal side of plasma membrane; intracellular membrane-bounded organelle; negative regulation of protein amino acid glutathionylation; oxidation reduction; pentose-phosphate shunt, oxidative branch; protein homodimerization activity; ribose phosphate biosynthetic process                                                                                                                                                                                                                                               |                                                                                                                                                                                         | Glucose-6-phosphate dehydrogenase family                             |
| 73 GBB1_HUMAN  | GNB1                                   | P62873            | Guanine nucleotide-binding protein G(I)/G(S)/G(T) subunit beta-1 (Transducin beta chain 1)                                           | GTPase activity; Ras protein signal transduction; hormone-mediated signaling; muscarinic acetylcholine receptor signaling pathway; signal transducer activity                                                                                                                                                                                                                                                                                                                                                                                                                                                                                                                                                                                                                                                                  |                                                                                                                                                                                         | WD repeat G protein beta family                                      |
| 74 GELS_HUMAN  | GSN                                    | P06396            | Gelsolin (Actin-depolymerizing factor) (ADF) (Brevin) (AGEL)                                                                         | actin binding; actin cytoskeleton; actin filament polymerization; actin filament severing; barbed-end actin filament capping; calcium ion binding; cytosol; extracellular region                                                                                                                                                                                                                                                                                                                                                                                                                                                                                                                                                                                                                                               | Cytoplasm , cytoskeleton. Secreted.                                                                                                                                                     | Villin/gelsolin family                                               |
| 75 GNA12_HUMAN | GNA12                                  | Q03113            | Guanine nucleotide-binding protein subunit alpha-12 (G-protein subunit alpha-12) (G alpha-12)                                        | G-protein coupled receptor protein signaling pathway; GTP binding; GTPase activity; blood coagulation; plasma membrane; protein binding; signal transducer activity                                                                                                                                                                                                                                                                                                                                                                                                                                                                                                                                                                                                                                                            | Membrane; Lipid-anchor.                                                                                                                                                                 | G-alpha family, G(12) subfamily                                      |

| Entry name | Gene names  | Uniprot Accession              | Protein names | Gene Ontology                                                                                                                                                                                                            | Subcellular Localization                                                                                                                                                                                                                                                                                                                                                         | Protein family                                 |                                                                                                     |
|------------|-------------|--------------------------------|---------------|--------------------------------------------------------------------------------------------------------------------------------------------------------------------------------------------------------------------------|----------------------------------------------------------------------------------------------------------------------------------------------------------------------------------------------------------------------------------------------------------------------------------------------------------------------------------------------------------------------------------|------------------------------------------------|-----------------------------------------------------------------------------------------------------|
| 76         | GNAI2_HUMAN | GNAI2 (GNAI2B)                 | P04899        | Guanine nucleotide-binding protein G(i), alpha-2 subunit (Adenylate cyclase-inhibiting G alpha protein)                                                                                                                  | GTP binding; GTPase activity; protein binding; response to nutrient; signal transducer activity                                                                                                                                                                                                                                                                                  |                                                | G-alpha family, G(i/o/t/z) subfamily                                                                |
| 77         | GP1BB_HUMAN | GP1BB                          | P13224        | Platelet glycoprotein Ib beta chain (GP-Ib beta) (GPIb-beta) (GPIbB) (Antigen CD42b-beta) (CD antigen CD42c)                                                                                                             | cell adhesion; cell surface receptor linked signal transduction; integral to plasma membrane; platelet activation; platelet alpha granule membrane; protein binding; transmembrane receptor activity                                                                                                                                                                             | Membrane; Single-pass type I membrane protein. |                                                                                                     |
| 78         | GPDM_HUMAN  | GPD2                           | P43304        | Glycerol-3-phosphate dehydrogenase, mitochondrial (GPDH-M) (GPD-M) (EC 1.1.5.3) (mtGPD)                                                                                                                                  | calcium ion binding; glycerol-3-phosphate dehydrogenase activity; glycerol-3-phosphate dehydrogenase complex; oxidation reduction                                                                                                                                                                                                                                                | Mitochondrion.                                 | FAD-dependent glycerol-3-phosphate dehydrogenase family                                             |
| 79         | GPV_HUMAN   | GP5                            | P40197        | Platelet glycoprotein V (GPV) (CD antigen CD42D)                                                                                                                                                                         | blood coagulation; cell adhesion; integral to plasma membrane; platelet alpha granule membrane; protein binding                                                                                                                                                                                                                                                                  | Membrane; Single-pass type I membrane protein. |                                                                                                     |
| 80         | GSH0_HUMAN  | GCLM (GLCLR)                   | P48507        | Glutamate--cysteine ligase regulatory subunit (Gamma-glutamylcysteine synthetase regulatory subunit) (Gamma-ECS regulatory subunit) (GCS light chain) (Glutamate--cysteine ligase modifier subunit)                      | cytosol; glutamate metabolic process; glutamate-cysteine ligase catalytic subunit binding; glutathione biosynthetic process; oxidation reduction; oxidoreductase activity; regulation of blood vessel size; response to drug; response to oxidative stress; soluble fraction                                                                                                     |                                                | Aldo/keto reductase family, Glutamate--cysteine ligase light chain subfamily                        |
| 81         | GTR3_HUMAN  | SLC2A3 (GLUT3)                 | P11169        | Solute carrier family 2, facilitated glucose transporter member 3 (Glucose transporter type 3, brain) (GLUT-3)                                                                                                           | carbohydrate metabolic process; cytoplasm; glucose transmembrane transporter activity; glucose transport; integral to membrane; plasma membrane; sugar:hydrogen symporter activity; transmembrane transport                                                                                                                                                                      | Membrane; Multi-pass membrane protein.         | Major facilitator superfamily, Sugar transporter (TC 2.A.1.1) family, Glucose transporter subfamily |
| 82         | HPCA_HUMAN  | HPCA (BDR2)                    | P84074        | Neuron-specific calcium-binding protein hippocalcin (Calcium-binding protein BDR-2)                                                                                                                                      | actin binding; calcium ion binding                                                                                                                                                                                                                                                                                                                                               |                                                | Recoverin family                                                                                    |
| 83         | HSP7C_HUMAN | HSPA8 (HSC70) (HSP73) (HSPA10) | P11142        | Heat shock cognate 71 kDa protein (Heat shock 70 kDa protein 8)                                                                                                                                                          | ATP binding; ATPase activity, coupled; cell surface; melanosome; protein binding; protein folding; response to unfolded protein                                                                                                                                                                                                                                                  | Cytoplasm. Melanosome.                         | Heat shock protein 70 family                                                                        |
| 84         | HSPB1_HUMAN | HSPB1 (HSP27) (HSP28)          | P04792        | Heat shock protein beta-1 (HspB1) (Heat shock 27 kDa protein) (HSP 27) (Stress-responsive protein 27) (SRP27) (Estrogen-regulated 24 kDa protein) (28 kDa heat shock protein)                                            | anti-apoptosis; cell death; cell motion; cell surface; cytoplasm; identical protein binding; nucleus; regulation of translational initiation; response to heat; response to unfolded protein; spindle                                                                                                                                                                            | Cytoplasm. Nucleus. Spindle.                   | Small heat shock protein (HSP20) family                                                             |
| 85         | HXK1_HUMAN  | HK1                            | P19367        | Hexokinase-1 (EC 2.7.1.1) (Hexokinase type I) (HK I) (Brain form hexokinase)                                                                                                                                             | ATP binding; cytosol; glycolysis; hexokinase activity;                                                                                                                                                                                                                                                                                                                           | Mitochondrion outer membrane.                  | Hexokinase family                                                                                   |
| 86         | HXK2_HUMAN  | HK2                            | P52789        | Hexokinase-2 (EC 2.7.1.1) (Hexokinase type II) (HK II) (Muscle form hexokinase)                                                                                                                                          | ATP binding; cytosol; glycolysis; hexokinase activity;                                                                                                                                                                                                                                                                                                                           | Mitochondrion outer membrane.                  | Hexokinase family                                                                                   |
| 87         | IF5A1_HUMAN | EIF5A                          | P63241        | Eukaryotic translation initiation factor 5A-1 (eIF-5A-1) (eIF-5A1) (Eukaryotic initiation factor 5A isoform 1) (eIF-5A) (eIF-4D) (Rev-binding factor)                                                                    | U6 snRNA binding; annulate lamellae; cell proliferation; cytosol; induction of apoptosis; mRNA export from nucleus; nuclear pore; peptidyl-lysine modification to hypusine; positive regulation of translational initiation; protein N-terminus binding; protein export from nucleus; translation initiation factor activity; translational initiation; viral genome replication | Nucleus.                                       | EIF-5A family                                                                                       |
| 88         | ILVBL_HUMAN | ILVBL (AHAS)                   | A1L0T0        | Acetolactate synthase-like protein (EC 2.2.1.-) (IlvB-like protein)                                                                                                                                                      | integral to membrane; magnesium ion binding; thiamin pyrophosphate binding; transferase activity                                                                                                                                                                                                                                                                                 | Membrane; Single-pass membrane protein.        | TPP enzyme family                                                                                   |
| 89         | IQGA2_HUMAN | IQGAP2                         | Q13576        | Ras GTPase-activating-like protein IQGAP2                                                                                                                                                                                | GTPase inhibitor activity; Ras GTPase activator activity; actin binding; actin cytoskeleton; calmodulin binding; regulation of small GTPase mediated signal transduction; small GTPase mediated signal transduction                                                                                                                                                              |                                                |                                                                                                     |
| 90         | ITA2_HUMAN  | ITGA2 (CD49B)                  | P17301        | Integrin alpha-2 (Platelet membrane glycoprotein Ia) (GPIa) (Collagen receptor) (VLA-2 alpha chain) (CD49 antigen-like family member B) (CD antigen CD49b)                                                               | blood coagulation; calcium ion binding; cell-matrix adhesion; collagen binding; identical protein binding; integrin complex; integrin-mediated signaling pathway; interspecies interaction between organisms; magnesium ion binding; organ morphogenesis; receptor activity                                                                                                      | Membrane; Single-pass type I membrane protein. | Integrin alpha chain family                                                                         |
| 91         | ITA2B_HUMAN | ITGA2B (GP2B) (ITGAB)          | P08514        | Integrin alpha-IIb (Platelet membrane glycoprotein IIb) (GPIIb) (GPIIb) (CD antigen CD41) [Cleaved into: Integrin alpha-IIb heavy chain; Integrin alpha-IIb light chain, form 1; Integrin alpha-IIb light chain, form 2] | calcium ion binding; cell adhesion; identical protein binding; integrin complex; integrin-mediated signaling pathway; platelet alpha granule membrane; receptor activity                                                                                                                                                                                                         | Membrane; Single-pass type I membrane protein. | Integrin alpha chain family                                                                         |



| Entry name      | Gene names                         | Uniprot Accession | Protein names                                                                                                                                                                 | Gene Ontology                                                                                                                                                                                                                                                                                                                                                                                                                                                                                 | Subcellular Localization                                                                      | Protein family                                    |
|-----------------|------------------------------------|-------------------|-------------------------------------------------------------------------------------------------------------------------------------------------------------------------------|-----------------------------------------------------------------------------------------------------------------------------------------------------------------------------------------------------------------------------------------------------------------------------------------------------------------------------------------------------------------------------------------------------------------------------------------------------------------------------------------------|-----------------------------------------------------------------------------------------------|---------------------------------------------------|
| 92 ITB1_HUMAN   | ITGB1 (FNRRB) (MDF2) (MSK12)       | P05556            | Integrin beta-1 (Fibronectin receptor subunit beta) (Integrin VLA-4 subunit beta) (CD antigen CD29)                                                                           | B cell differentiation; cell surface; cell-cell adhesion mediated by integrin; cell-matrix adhesion; cellular defense response; homophilic cell adhesion; identical protein binding; integrin complex; integrin-mediated signaling pathway; interspecies interaction between organisms; leukocyte adhesion; melanosome; neuromuscular junction; protein heterodimerization activity; receptor activity; ruffle; sarcolemma                                                                    | Cell membrane; Single-pass type I membrane protein. Melanosome.                               | Integrin beta chain family                        |
| 93 ITB3_HUMAN   | ITGB3 (GP3A)                       | P05106            | Integrin beta-3 (Platelet membrane glycoprotein IIIa) (GPIIIa) (CD antigen CD61)                                                                                              | blood coagulation; cell-matrix adhesion; identical protein binding; integrin complex; integrin-mediated signaling pathway; interspecies interaction between organisms; negative regulation of foam cell differentiation; negative regulation of lipid storage; negative regulation of lipid transport; negative regulation of lipoprotein metabolic process; negative regulation of low-density lipoprotein receptor biosynthetic process; platelet alpha granule membrane; receptor activity | Membrane; Single-pass type I membrane protein.                                                | Integrin beta chain family                        |
| 94 JAM1_HUMAN   | F11R (JAM1) (JCAM) (UNQ264/PRO301) | Q9Y624            | Junctional adhesion molecule A (JAM-A) (Junctional adhesion molecule 1) (JAM-1) (Platelet adhesion molecule 1) (PAM-1) (Platelet F11 receptor) (CD antigen CD321)             | inflammatory response; integral to membrane; interspecies interaction between organisms; tight junction                                                                                                                                                                                                                                                                                                                                                                                       | Cell junction , tight junction. Cell membrane; Single-pass type I membrane protein.           | Immunoglobulin superfamily                        |
| 95 JAM3_HUMAN   | JAM3 (UNQ859/PRO1868)              | Q9BX67            | Junctional adhesion molecule C (JAM-C) (Junctional adhesion molecule 3) (JAM-3) (JAM-2)                                                                                       | integral to membrane; plasma membrane                                                                                                                                                                                                                                                                                                                                                                                                                                                         | Cell membrane; Single-pass type I membrane protein.                                           | Immunoglobulin superfamily                        |
| 96 K6PL_HUMAN   | PFKL                               | P17858            | 6-phosphofructokinase, liver type (EC 2.7.1.11) (Phosphofructokinase 1) (Phosphohexokinase) (Phosphofructo-1-kinase isozyme B) (PFK-B)                                        | 6-phosphofructokinase activity; 6-phosphofructokinase complex; ATP binding; fructose 6-phosphate metabolic process; fructose-6-phosphate binding; glycolysis; identical protein binding; kinase binding; magnesium ion binding; protein oligomerization                                                                                                                                                                                                                                       |                                                                                               | Phosphofructokinase family, Two domains subfamily |
| 97 K6PP_HUMAN   | PFKP (PFKF)                        | Q01813            | 6-phosphofructokinase type C (EC 2.7.1.11) (Phosphofructokinase 1) (Phosphohexokinase) (Phosphofructo-1-kinase isozyme C) (PFK-C) (6-phosphofructokinase, platelet type)      | 6-phosphofructokinase activity; 6-phosphofructokinase complex; ATP binding; glycolysis; magnesium ion binding; protein binding                                                                                                                                                                                                                                                                                                                                                                |                                                                                               | Phosphofructokinase family, Two domains subfamily |
| 98 LIMS1_HUMAN  | LIMS1 (PINCH) (PINCH1)             | P48059            | LIM and senescent cell antigen-like-containing domain protein 1 (Particularly interesting new Cys-His protein 1) (PINCH-1) (Renal carcinoma antigen NY-REN-48)                | cell aging; focal adhesion; protein binding; zinc ion binding                                                                                                                                                                                                                                                                                                                                                                                                                                 | Cell junction , focal adhesion. Cell membrane; Peripheral membrane protein; Cytoplasmic side. |                                                   |
| 99 LOX12_HUMAN  | ALOX12 (LOG12)                     | P18054            | Arachidonate 12-lipoxygenase, 12S-type (12-LOX) (EC 1.13.11.31) (Platelet-type lipoxygenase 12)                                                                               | anti-apoptosis; arachidonate 12-lipoxygenase activity; cell motion; cytosol; fatty acid oxidation; hepxilin-epoxide hydrolase activity; iron ion binding; leukotriene biosynthetic process; lipoxygenase activity; oxidation reduction; positive regulation of cell adhesion; positive regulation of cell growth; positive regulation of cell proliferation; protein binding; sarcolemma; superoxide release                                                                                  | Cytoplasm.                                                                                    | Lipoxygenase family                               |
| 100 LRBA_HUMAN  | LRBA (BGL) (CDC4L) (LBA)           | P50851            | Lipopolysaccharide-responsive and beige-like anchor protein (CDC4-like protein) (Beige-like protein)                                                                          | protein binding                                                                                                                                                                                                                                                                                                                                                                                                                                                                               |                                                                                               |                                                   |
| 101 LYAM3_HUMAN | SELP (GMRP) (GRMP)                 | P16109            | P-selectin (Granule membrane protein 140) (GMP-140) (PADGEM) (Leukocyte-endothelial cell adhesion molecule 3) (LECAM3) (CD62 antigen-like family member P) (CD antigen CD62P) | defense response to Gram-negative bacterium; external side of plasma membrane; extracellular space; fucose binding; glycosphingolipid binding; heparin binding; integral to plasma membrane; leukocyte adhesion; lipopolysaccharide binding; membrane fraction; oligosaccharide binding; platelet alpha granule membrane; positive regulation of platelet activation; protein binding; response to lipopolysaccharide; sialic acid binding; soluble fraction                                  | Membrane; Single-pass type I membrane protein.                                                | Selectin/LECAM family                             |
| 102 MARE2_HUMAN | MAPRE2 (RP1)                       | Q15555            | Microtubule-associated protein RP/EB family member 2 (APC-binding protein EB2) (End-binding protein 2) (EB2)                                                                  | cell division; cell proliferation; cytoplasm; microtubule; microtubule binding; mitosis; signal transduction                                                                                                                                                                                                                                                                                                                                                                                  | Cytoplasm.                                                                                    | MAPRE family                                      |

| Entry name       | Gene names                           | Uniprot Accession | Protein names                                                                                                                                                                                                                   | Gene Ontology                                                                                                                                                                                                                                                                                                                                                                                                                                                                                                                                                                                                                                              | Subcellular Localization                                                                                                                 | Protein family                                               |
|------------------|--------------------------------------|-------------------|---------------------------------------------------------------------------------------------------------------------------------------------------------------------------------------------------------------------------------|------------------------------------------------------------------------------------------------------------------------------------------------------------------------------------------------------------------------------------------------------------------------------------------------------------------------------------------------------------------------------------------------------------------------------------------------------------------------------------------------------------------------------------------------------------------------------------------------------------------------------------------------------------|------------------------------------------------------------------------------------------------------------------------------------------|--------------------------------------------------------------|
| 103 MDHM_HUMAN   | MDH2                                 | P40926            | Malate dehydrogenase, mitochondrial (EC 1.1.1.37)                                                                                                                                                                               | L-malate dehydrogenase activity; binding; glycolysis; malate metabolic process; mitochondrial matrix; oxidation reduction; tricarboxylic acid cycle                                                                                                                                                                                                                                                                                                                                                                                                                                                                                                        | Mitochondrion matrix.                                                                                                                    | LDH/MDH superfamily, MDH type 1 family                       |
| 104 MGLL_HUMAN   | MGLL                                 | Q99685            | Monoglyceride lipase (MGL) (EC 3.1.1.23) (Lysophospholipase homolog) (Lysophospholipase-like) (HU-K5)                                                                                                                           | acylglycerol lipase activity; inflammatory response; lipid metabolic process;                                                                                                                                                                                                                                                                                                                                                                                                                                                                                                                                                                              |                                                                                                                                          | AB hydrolase superfamily, Monoacylglycerol lipase family     |
| 105 ML12A_HUMAN  | MYL12A (MLCB) (MRLC3) (RLC)          | P19105            | Myosin regulatory light chain 12A (Myosin regulatory light chain MRLC3) (Myosin regulatory light chain 2, nonsarcomeric) (Myosin RLC) (MLC-2B)                                                                                  | lysophospholipase activity calcium ion binding; motor activity; myosin complex; protein binding                                                                                                                                                                                                                                                                                                                                                                                                                                                                                                                                                            |                                                                                                                                          |                                                              |
| 106 MLE1_HUMAN   | MYL1                                 | P05976            | Myosin light chain 1, skeletal muscle isoform (MLC1F) (A1 catalytic) (Alkali myosin light chain 1)                                                                                                                              | calcium ion binding; motor activity; muscle filament sliding; muscle myosin complex; muscle organ development; sarcomere; structural constituent of muscle                                                                                                                                                                                                                                                                                                                                                                                                                                                                                                 |                                                                                                                                          |                                                              |
| 107 MMRN1_HUMAN  | MMRN1 (ECM) (EMILIN4) (GP1A*) (MMRN) | Q13201            | Multimerin-1 (Endothelial cell multimerin) (EMILIN-4) (Elastin microfibril interface located protein 4) (Elastin microfibril interface 4) [Cleaved into: Platelet glycoprotein Ia*; 155 kDa platelet multimerin (p-155) (p155)] | blood coagulation; cell adhesion; extracellular region; platelet alpha granule lumen                                                                                                                                                                                                                                                                                                                                                                                                                                                                                                                                                                       | Secreted.                                                                                                                                |                                                              |
| 108 MPKS1_HUMAN  | MAPKSP1 (MAP2K1IP1) (PRO2783)        | Q9UHA4            | Mitogen-activated protein kinase scaffold protein 1 (Mitogen-activated protein kinase kinase 1-interacting protein 1) (MEK-binding partner 1) (Mp1)                                                                             | late endosome membrane; protein binding                                                                                                                                                                                                                                                                                                                                                                                                                                                                                                                                                                                                                    | Late endosome membrane; Peripheral membrane protein; Cytoplasmic side.                                                                   | MAPKSP1 family                                               |
| 109 MYH11_HUMAN  | MYH11 (KIAA0866)                     | P35749            | Myosin-11 (Myosin heavy chain 11) (Myosin heavy chain, smooth muscle isoform) (SMMHC)                                                                                                                                           | ATP binding; actin binding; calmodulin binding; cardiac muscle fiber development; elastic fiber assembly; melanosome; motor activity; muscle thick filament assembly; smooth muscle contraction; striated muscle contraction; striated muscle thick filament; structural constituent of muscle                                                                                                                                                                                                                                                                                                                                                             | Melanosome.                                                                                                                              |                                                              |
| 110 MYH9_HUMAN   | MYH9                                 | P35579            | Myosin-9 (Myosin heavy chain 9) (Myosin heavy chain, non-muscle IIa) (Non-muscle myosin heavy chain IIa) (NMMHC II-a) (NMMHC-IIA) (Cellular myosin heavy chain, type A) (Non-muscle myosin heavy chain A) (NMMHC-A)             | ADP binding; ATP binding; actin cytoskeleton reorganization; actin filament binding; actin filament-based movement; actin-dependent ATPase activity; angiogenesis; blood vessel endothelial cell migration; calmodulin binding; cleavage furrow; contractile ring; cytokinesis; cytosol; integrin-mediated signaling pathway; leukocyte migration; membrane protein ectodomain proteolysis; microfilament motor activity; monocyte differentiation; myosin complex; nucleus; platelet formation; protein anchor; protein homodimerization activity; protein transport; regulation of cell shape; ruffle; sensory perception of sound; stress fiber; uropod |                                                                                                                                          |                                                              |
| 111 MYL6_HUMAN   | MYL6                                 | P60660            | Myosin light polypeptide 6 (Smooth muscle and nonmuscle myosin light chain alkali 6) (Myosin light chain alkali 3) (Myosin light chain 3) (MLC-3) (LC17)                                                                        | actin-dependent ATPase activity; calcium ion binding; motor activity; muscle filament sliding; skeletal muscle tissue development; structural constituent of muscle;                                                                                                                                                                                                                                                                                                                                                                                                                                                                                       |                                                                                                                                          |                                                              |
| 112 MYL6B_HUMAN  | MYL6B (MLC1SA)                       | P14649            | Myosin light chain 6B (Smooth muscle and nonmuscle myosin light chain alkali 6B) (Myosin light chain 1 slow-twitch muscle A isoform) (MLC1sa)                                                                                   | unconventional myosin complex calcium ion binding; motor activity; muscle filament sliding; muscle myosin complex; protein binding; skeletal muscle tissue development; structural constituent of muscle;                                                                                                                                                                                                                                                                                                                                                                                                                                                  |                                                                                                                                          |                                                              |
| 113 MYL9_HUMAN   | MYL9 (MLC2) (MRLC1) (MYRL2)          | P24844            | Myosin regulatory light polypeptide 9 (Myosin regulatory light chain 9) (Myosin regulatory light chain MRLC1) (Myosin regulatory light chain 2, smooth muscle isoform) (Myosin RLC) (MLC-2C) (LC20)                             | unconventional myosin complex calcium ion binding; motor activity; muscle myosin complex; regulation of muscle contraction; structural constituent of muscle                                                                                                                                                                                                                                                                                                                                                                                                                                                                                               |                                                                                                                                          |                                                              |
| 114 NB5R3_HUMAN  | CYB5R3 (DIA1)                        | P00387            | NADH-cytochrome b5 reductase 3 (Cytochrome b5 reductase) (B5R) (EC 1.6.2.2) (Diaphorase-1) [Cleaved into: NADH-cytochrome b5 reductase 3 membrane-bound form; NADH-cytochrome b5 reductase 3 soluble form]                      | blood circulation; cholesterol biosynthetic process; cytochrome-b5 reductase activity; electron carrier activity; endoplasmic reticulum membrane; hemoglobin complex; mitochondrial outer membrane; oxidation reduction                                                                                                                                                                                                                                                                                                                                                                                                                                    | Endoplasmic reticulum membrane; Lipid-anchor; Cytoplasmic side. Mitochondrion outer membrane; Lipid-anchor; Cytoplasmic side. Cytoplasm. | Flavoprotein pyridine nucleotide cytochrome reductase family |
| 115 NDUFB8_HUMAN | NDUFB8                               | O95169            | NADH dehydrogenase [ubiquinone] 1 beta subcomplex subunit 8, mitochondrial (NADH-ubiquinone oxidoreductase ASH1 subunit) (Complex I-ASH1) (CI-ASH1)                                                                             | NADH dehydrogenase (ubiquinone) activity; endoplasmic reticulum; integral to membrane; mitochondrial electron transport, NADH to ubiquinone; mitochondrial respiratory chain complex I; transport                                                                                                                                                                                                                                                                                                                                                                                                                                                          | Mitochondrion inner membrane; Single-pass membrane protein; Matrix side.                                                                 | Complex I NDUFB8 subunit family                              |

| Entry name      | Gene names                    | Uniprot Accession | Protein names                                                                                                                                                                  | Gene Ontology                                                                                                                                                                                                                                                                                                                                                                                                             | Subcellular Localization                                                                                                | Protein family                                 |
|-----------------|-------------------------------|-------------------|--------------------------------------------------------------------------------------------------------------------------------------------------------------------------------|---------------------------------------------------------------------------------------------------------------------------------------------------------------------------------------------------------------------------------------------------------------------------------------------------------------------------------------------------------------------------------------------------------------------------|-------------------------------------------------------------------------------------------------------------------------|------------------------------------------------|
| 116 NNTM_HUMAN  | NNT                           | Q13423            | NAD(P) transhydrogenase, mitochondrial (EC 1.6.1.2) (Nicotinamide nucleotide transhydrogenase) (Pyridine nucleotide transhydrogenase)                                          | NAD or NADH binding; NAD(P)+ transhydrogenase (AB-specific) activity; NAD(P)+ transhydrogenase (B-specific) activity; NADP or NADPH binding; electron carrier activity; integral to membrane; mitochondrial respiratory chain; oxidation reduction; proton transport; tricarboxylic acid cycle                                                                                                                            | Mitochondrion inner membrane; Multi-pass membrane protein; Matrix side.                                                 | AlaDH/PNT family; PNT beta subunit family      |
| 117 PARVA_HUMAN | PARVA (MXRA2)                 | Q9NVD7            | Alpha-parvin (Calponin-like integrin-linked kinase-binding protein) (CH-ILKBP) (Matrix-remodeling-associated protein 2) (Actopaxin)                                            | actin binding; cell adhesion; cytoplasm; cytoskeleton; focal adhesion                                                                                                                                                                                                                                                                                                                                                     | Cell junction , focal adhesion. Cell membrane; Peripheral membrane protein; Cytoplasmic side. Cytoplasm , cytoskeleton. | Parvin family                                  |
| 118 PARVB_HUMAN | PARVB (CGI-56)                | Q9HB11            | Beta-parvin (Affixin)                                                                                                                                                          | actin binding; cell adhesion; cytoplasm; cytoskeleton; focal adhesion                                                                                                                                                                                                                                                                                                                                                     | Cell junction , focal adhesion. Cell membrane; Peripheral membrane protein; Cytoplasmic side. Cytoplasm , cytoskeleton. | Parvin family                                  |
| 119 PCF11_HUMAN | PCF11 (KIAA0824)              | O94913            | Pre-mRNA cleavage complex 2 protein Pcf11 (Pre-mRNA cleavage complex II protein Pcf11)                                                                                         | mRNA cleavage; mRNA cleavage factor complex; nuclear mRNA splicing, via spliceosome                                                                                                                                                                                                                                                                                                                                       | Nucleus.                                                                                                                |                                                |
| 120 PCYXL_HUMAN | PCYXL (PSEC0105)              | Q8NBM8            | Prenylcysteine oxidase-like (EC 1.8.3.-)                                                                                                                                       | extracellular region; oxidation reduction; oxidoreductase activity, acting on sulfur group of donors, oxygen as acceptor; prenylcysteine catabolic process                                                                                                                                                                                                                                                                | Secreted.                                                                                                               | Prenylcysteine oxidase family                  |
| 121 PDIA3_HUMAN | PDIA3 (ERP57) (ERP60) (GRP58) | P30101            | Protein disulfide-isomerase A3 (EC 5.3.4.1) (Disulfide isomerase ER-60) (ERp60) (58 kDa microsomal protein) (p58) (ERp57) (58 kDa glucose-regulated protein)                   | cell redox homeostasis; cysteine-type endopeptidase activity; endoplasmic reticulum; endoplasmic reticulum lumen; melanosome; phospholipase C activity; protein binding; protein disulfide isomerase activity; protein import into nucleus; protein retention in ER lumen; signal transduction                                                                                                                            | Endoplasmic reticulum lumen. Melanosome.                                                                                | Protein disulfide isomerase family             |
| 122 PDIA6_HUMAN | PDIA6 (TXNDC7)                | Q15084            | Protein disulfide-isomerase A6 (EC 5.3.4.1) (Protein disulfide isomerase P5) (Thioredoxin domain-containing protein 7)                                                         | ER-Golgi intermediate compartment; cell redox homeostasis; endoplasmic reticulum; endoplasmic reticulum lumen; melanosome; protein binding; protein disulfide isomerase activity; protein folding                                                                                                                                                                                                                         | Endoplasmic reticulum lumen. Melanosome.                                                                                | Protein disulfide isomerase family             |
| 123 PECA1_HUMAN | PECAM1                        | P16284            | Platelet endothelial cell adhesion molecule (PECAM-1) (EndoCAM) (GPIIA') (CD antigen CD31)                                                                                     | cell adhesion; cell recognition; extracellular space; integral to membrane; plasma membrane; platelet alpha granule membrane; protein binding; signal transduction                                                                                                                                                                                                                                                        | Membrane; Single-pass type I membrane protein.                                                                          |                                                |
| 124 PGH1_HUMAN  | PTGS1 (COX1)                  | P23219            | Prostaglandin G/H synthase 1 (EC 1.14.99.1) (Cyclooxygenase-1) (COX-1) (Prostaglandin-endoperoxide synthase 1) (Prostaglandin H2 synthase 1) (PGH synthase 1) (PGHS-1) (PHS 1) | Golgi apparatus; endoplasmic reticulum membrane; heme binding; microsome; nucleus; oxidation reduction; oxidoreductase activity, acting on single donors with incorporation of molecular oxygen, incorporation of two atoms of oxygen; peroxidase activity; plasma membrane; prostaglandin biosynthetic process; prostaglandin-endoperoxide synthase activity; regulation of blood pressure; response to oxidative stress | Microsome membrane; Peripheral membrane protein. Endoplasmic reticulum membrane; Peripheral membrane protein.           | Prostaglandin G/H synthase family              |
| 125 PHF2_HUMAN  | PHF2 (KIAA0662)               | O75151            | PHD finger protein 2 (GRC5)                                                                                                                                                    | nucleus; protein binding; zinc ion binding                                                                                                                                                                                                                                                                                                                                                                                | Nucleus.                                                                                                                |                                                |
| 126 PI4KA_HUMAN | PI4KA (PIK4) (PIK4CA)         | P42356            | Phosphatidylinositol 4-kinase alpha (PI4-kinase alpha) (PtdIns-4-kinase alpha) (PI4K-alpha) (EC 2.7.1.67)                                                                      | 1-phosphatidylinositol 4-kinase activity; ATP binding; Golgi-associated vesicle; phosphatidylinositol biosynthetic process; phosphoinositide phosphorylation; phosphoinositide-mediated signaling; protein binding; synaptic transmission                                                                                                                                                                                 |                                                                                                                         | PI3/PI4-kinase family, Type III PI4K subfamily |

| Entry name      | Gene names                                      | Uniprot Accession | Protein names                                                                                                                                                                                                                                                                                                                                                                    | Gene Ontology                                                                                                                                                                                                                                                                                                                                                                                                                                                                                                                                                                                                                                                                                                                                                                                                                                                                                                                                         | Subcellular Localization                                                | Protein family                                     |
|-----------------|-------------------------------------------------|-------------------|----------------------------------------------------------------------------------------------------------------------------------------------------------------------------------------------------------------------------------------------------------------------------------------------------------------------------------------------------------------------------------|-------------------------------------------------------------------------------------------------------------------------------------------------------------------------------------------------------------------------------------------------------------------------------------------------------------------------------------------------------------------------------------------------------------------------------------------------------------------------------------------------------------------------------------------------------------------------------------------------------------------------------------------------------------------------------------------------------------------------------------------------------------------------------------------------------------------------------------------------------------------------------------------------------------------------------------------------------|-------------------------------------------------------------------------|----------------------------------------------------|
| 127 PLEK_HUMAN  | PLEK (P47)                                      | P08567            | Pleckstrin (Platelet p47 protein)                                                                                                                                                                                                                                                                                                                                                | actin cytoskeleton reorganization; cortical actin cytoskeleton organization; cytoplasm; hemopoietic progenitor cell differentiation; inhibition of phospholipase C activity involved in G-protein coupled receptor signaling pathway; integrin-mediated signaling pathway; membrane fraction; negative regulation of calcium-mediated signaling; negative regulation of inositol phosphate biosynthetic process; phosphate binding; phosphatidylinositol-3,4-bisphosphate binding; phosphoinositide metabolic process; platelet aggregation; positive regulation of actin filament bundle formation; positive regulation of actin filament depolymerization; positive regulation of inositol-polyphosphate 5-phosphatase activity; positive regulation of integrin activation; positive regulation of platelet activation; protein homodimerization activity; protein kinase C binding; protein kinase C signaling cascade; protein secretion by cell |                                                                         |                                                    |
| 128 PLF4_HUMAN  | PF4 (CXCL4) (SCYB4)                             | P02776            | Platelet factor 4 (PF-4) (C-X-C motif chemokine 4) (Oncostatin-A) (Iroplact) [Cleaved into: Platelet factor 4, short form]                                                                                                                                                                                                                                                       | chemokine activity; cytokine-mediated signaling pathway; extracellular space; heparin binding; immune response; leukocyte chemotaxis; negative regulation of MHC class II biosynthetic process; negative regulation of angiogenesis; negative regulation of apoptosis; negative regulation of cytolysis; negative regulation of megakaryocyte differentiation; platelet activation; platelet alpha granule lumen; positive regulation of foam cell differentiation; positive regulation of gene expression; positive regulation of tumor necrosis factor production                                                                                                                                                                                                                                                                                                                                                                                   | Secreted.                                                               | Intercrine alpha (chemokine CxC) family            |
| 129 PP1B_HUMAN  | PPP1CB                                          | P62140            | Serine/threonine-protein phosphatase PP1-beta catalytic subunit (PP-1B) (EC 3.1.3.16)                                                                                                                                                                                                                                                                                            | cell cycle; cell division; cytoplasm; glycogen metabolic process; histone methyltransferase complex; iron ion binding; manganese ion binding; protein binding                                                                                                                                                                                                                                                                                                                                                                                                                                                                                                                                                                                                                                                                                                                                                                                         | Cytoplasm.                                                              | PPP phosphatase family, PP-1 subfamily             |
| 130 PPIA_HUMAN  | PPIA (CYPA)                                     | P62937            | Peptidyl-prolyl cis-trans isomerase A (PPIase A) (Rotamase A) (EC 5.2.1.8) (Cyclophilin A) (Cyclosporin A-binding protein)                                                                                                                                                                                                                                                       | cytosol; extracellular region; initiation of viral infection; interspecies interaction between organisms; nucleus; peptide binding; peptidyl-prolyl cis-trans isomerase activity; protein folding; provirus integration; regulation of viral genome replication; unfolded protein binding; virion binding                                                                                                                                                                                                                                                                                                                                                                                                                                                                                                                                                                                                                                             | Cytoplasm.                                                              | Cyclophilin-type PPIase family, PPIase A subfamily |
| 131 PPIB_HUMAN  | PPIB (CYPB)                                     | P23284            | Peptidyl-prolyl cis-trans isomerase B (PPIase) (Rotamase) (EC 5.2.1.8) (Cyclophilin B) (S-cyclophilin) (SCYLP) (CYP-S1)                                                                                                                                                                                                                                                          | endoplasmic reticulum; endoplasmic reticulum lumen; melanosome; peptide binding; peptidyl-prolyl cis-trans isomerase activity; protein folding; unfolded protein binding                                                                                                                                                                                                                                                                                                                                                                                                                                                                                                                                                                                                                                                                                                                                                                              | Endoplasmic reticulum lumen. Melanosome.                                | Cyclophilin-type PPIase family, PPIase B subfamily |
| 132 PPIF_HUMAN  | PPIF (CYP3)                                     | P30405            | Peptidyl-prolyl cis-trans isomerase, mitochondrial (PPIase) (Rotamase) (EC 5.2.1.8) (Cyclophilin F)                                                                                                                                                                                                                                                                              | membrane fraction; mitochondrial matrix; peptide binding; peptidyl-prolyl cis-trans isomerase activity; protein folding                                                                                                                                                                                                                                                                                                                                                                                                                                                                                                                                                                                                                                                                                                                                                                                                                               | Mitochondrion matrix.                                                   | Cyclophilin-type PPIase family                     |
| 133 PRAF3_HUMAN | ARL6IP5 (DERP11) (JWA) (PRA2) (PRAF3) (HSPC127) | O75915            | PRA1 family protein 3 (ADP-ribosylation factor-like protein 6-interacting protein 5) (ARL-6-interacting protein 5) (Aip-5) (Glutamate transporter EAAC1-interacting protein) (GTRAP3-18) (Prenylated Rab acceptor protein 2) (Protein JWa) (Dermal papilla-derived protein 11) (JM5) (Putative MAPK-activating protein PM27) (Cytoskeleton-related vitamin A-responsive protein) | L-glutamate transport; endoplasmic reticulum membrane; integral to membrane; protein binding                                                                                                                                                                                                                                                                                                                                                                                                                                                                                                                                                                                                                                                                                                                                                                                                                                                          | Endoplasmic reticulum membrane; Multi-pass membrane protein. Cytoplasm. | PRA1 family                                        |
| 134 PROF1_HUMAN | PFN1                                            | P07737            | Profilin-1 (Profilin I)                                                                                                                                                                                                                                                                                                                                                          | actin binding; actin cytoskeleton; actin cytoskeleton organization; cytoplasm                                                                                                                                                                                                                                                                                                                                                                                                                                                                                                                                                                                                                                                                                                                                                                                                                                                                         | Cytoplasm , cytoskeleton.                                               | Profilin family                                    |

| Entry name      | Gene names                  | Uniprot Accession | Protein names                                                                                                                                                                                                            | Gene Ontology                                                                                                                                                                                                                                                                                                                                                | Subcellular Localization                                                                              | Protein family                              |
|-----------------|-----------------------------|-------------------|--------------------------------------------------------------------------------------------------------------------------------------------------------------------------------------------------------------------------|--------------------------------------------------------------------------------------------------------------------------------------------------------------------------------------------------------------------------------------------------------------------------------------------------------------------------------------------------------------|-------------------------------------------------------------------------------------------------------|---------------------------------------------|
| 135 PURA_HUMAN  | PURA (PUR1)                 | Q00577            | Transcriptional activator protein Pur-alpha (Purine-rich single-stranded DNA-binding protein alpha)                                                                                                                      | DNA replication factor A complex; DNA replication initiation; DNA unwinding during replication; RNA polymerase II transcription factor activity, enhancer binding; double-stranded telomeric DNA binding; nuclear chromosome, telomeric region; single-stranded DNA binding; transcription; transcription factor binding                                     | Nucleus.                                                                                              | PUR DNA-binding protein family              |
| 136 QCR1_HUMAN  | UQCRC1                      | P31930            | Cytochrome b-c1 complex subunit 1, mitochondrial (Ubiquinol-cytochrome-c reductase complex core protein 1) (Core protein I) (Complex III subunit 1)                                                                      | aerobic respiration; metalloendopeptidase activity; mitochondrial respiratory chain; protein binding; proteolysis; transport; ubiquinol-cytochrome-c reductase activity; zinc ion binding                                                                                                                                                                    | Mitochondrion inner membrane.                                                                         | Peptidase M16 family, UQCRC1/QCR1 subfamily |
| 137 QCR2_HUMAN  | UQCRC2                      | P22695            | Cytochrome b-c1 complex subunit 2, mitochondrial (Ubiquinol-cytochrome-c reductase complex core protein 2) (Core protein II) (Complex III subunit 2)                                                                     | aerobic respiration; electron transport chain; metalloendopeptidase activity; mitochondrial inner membrane; nucleus; oxidative phosphorylation; protein binding; proteolysis; respiratory chain; transport; zinc ion binding                                                                                                                                 | Mitochondrion inner membrane; Peripheral membrane protein; Matrix side.                               | Peptidase M16 family, UQCRC2/QCR2 subfamily |
| 138 RAP1A_HUMAN | RAP1A (KREV1)               | P62834            | Ras-related protein Rap-1A (GTP-binding protein smg-p21A) (Ras-related protein Krev-1) (C21KG) (G-22K)                                                                                                                   | GTP binding; GTPase activity; cell cycle; cytosol; negative regulation of cell cycle; plasma membrane                                                                                                                                                                                                                                                        | Cell membrane; Lipid-anchor.                                                                          | Small GTPase superfamily, Ras family        |
| 139 RASA3_HUMAN | RASA3                       | Q14644            | Ras GTPase-activating protein 3 (GAP1(IP4BP)) (Ins P4-binding protein)                                                                                                                                                   | GTPase activator activity; calcium-release channel activity; intracellular; intracellular signaling cascade; intrinsic to internal side of plasma membrane; regulation of small GTPase mediated signal transduction; zinc ion binding                                                                                                                        | Cell membrane.                                                                                        |                                             |
| 140 RB11A_HUMAN | RAB11A (RAB11)              | P62491            | Ras-related protein Rab-11A (Rab-11) (YL8)                                                                                                                                                                               | GTP binding; GTPase activity; plasma membrane; plasma membrane to endosome transport; recycling endosome membrane; small GTPase mediated signal transduction; syntaxin binding; trans-Golgi network; transporter activity                                                                                                                                    | Cell membrane; Peripheral membrane protein. Recycling endosome membrane; Peripheral membrane protein. | Small GTPase superfamily, Rab family        |
| 141 RB27B_HUMAN | RAB27B                      | O00194            | Ras-related protein Rab-27B (C25KG)                                                                                                                                                                                      | GTP binding; GTPase activity; membrane; protein transport; small GTPase mediated signal transduction                                                                                                                                                                                                                                                         | Membrane; Lipid-anchor.                                                                               | Small GTPase superfamily, Rab family        |
| 142 RGS18_HUMAN | RGS18 (RGS13)               | Q9NS28            | Regulator of G-protein signaling 18 (RGS18)                                                                                                                                                                              | cytoplasm; negative regulation of signal transduction; signal transducer activity                                                                                                                                                                                                                                                                            | Cytoplasm.                                                                                            |                                             |
| 143 RHOA_HUMAN  | RHOA (ARH12) (ARHA) (RHO12) | P61586            | Transforming protein RhoA (H12)                                                                                                                                                                                          | GTP binding; GTPase activity; Rho protein signal transduction; cytoplasm; cytoskeleton; magnesium ion binding; myosin binding; plasma membrane; positive regulation of I-kappaB kinase/NF-kappaB cascade; positive regulation of NF-kappaB import into nucleus; positive regulation of neuron differentiation; positive regulation of stress fiber formation | Cell membrane; Lipid-anchor; Cytoplasmic side. Cytoplasm, cytoskeleton.                               | Small GTPase superfamily, Rho family        |
| 144 RHOC_HUMAN  | RHOC (ARH9) (ARHC)          | P08134            | Rho-related GTP-binding protein RhoC (H9)                                                                                                                                                                                | GTP binding; GTPase activity; intracellular; plasma membrane; positive regulation of I-kappaB kinase/NF-kappaB cascade; protein binding; signal transducer activity; small GTPase mediated signal transduction                                                                                                                                               | Cell membrane; Lipid-anchor; Cytoplasmic side.                                                        | Small GTPase superfamily, Rho family        |
| 145 RLA2_HUMAN  | RPLP2 (D11S2243E) (RPP2)    | P05387            | 60S acidic ribosomal protein P2 (Renal carcinoma antigen NY-REN-44)                                                                                                                                                      | RNA binding; cytosolic large ribosomal subunit; structural constituent of ribosome; translational elongation                                                                                                                                                                                                                                                 |                                                                                                       | Ribosomal protein L12P family               |
| 146 RPN1_HUMAN  | RPN1                        | P04843            | Dolichyl-diphosphooligosaccharide--protein glycosyltransferase subunit 1 (EC 2.4.1.119) (Dolichyl-diphosphooligosaccharide--protein glycosyltransferase 67 kDa subunit) (Ribophorin-1) (Ribophorin I) (RPN-I)            | dolichyl-diphosphooligosaccharide-protein glycotransferase activity; integral to membrane; melanosome; oligosaccharyltransferase complex; protein amino acid N-linked glycosylation via asparagine; protein binding; rough endoplasmic reticulum membrane                                                                                                    | Endoplasmic reticulum membrane; Single-pass type I membrane protein. Melanosome.                      | OST1 family                                 |
| 147 RPN2_HUMAN  | RPN2                        | P04844            | Dolichyl-diphosphooligosaccharide--protein glycosyltransferase subunit 2 (EC 2.4.1.119) (Dolichyl-diphosphooligosaccharide--protein glycosyltransferase 63 kDa subunit) (Ribophorin-2) (Ribophorin II) (RPN-II) (RIBIIR) | dolichyl-diphosphooligosaccharide-protein glycotransferase activity; integral to membrane; oligosaccharyltransferase complex; protein amino acid N-linked glycosylation via asparagine; protein binding                                                                                                                                                      | Endoplasmic reticulum membrane; Multi-pass membrane protein.                                          | SWP1 family                                 |
| 148 RSU1_HUMAN  | RSU1 (RSP1)                 | Q15404            | Ras suppressor protein 1 (Rsu-1) (RSP-1)                                                                                                                                                                                 | protein binding; signal transduction                                                                                                                                                                                                                                                                                                                         |                                                                                                       |                                             |

| Entry name      | Gene names                              | Uniprot Accession | Protein names                                                                                                                                                               | Gene Ontology                                                                                                                                                                                                                                                          | Subcellular Localization                                                                                                                                                                                                                               | Protein family                    |
|-----------------|-----------------------------------------|-------------------|-----------------------------------------------------------------------------------------------------------------------------------------------------------------------------|------------------------------------------------------------------------------------------------------------------------------------------------------------------------------------------------------------------------------------------------------------------------|--------------------------------------------------------------------------------------------------------------------------------------------------------------------------------------------------------------------------------------------------------|-----------------------------------|
| 149 RTN4_HUMAN  | RTN4 (KIAA0886) (NOGO) (My043) (SP1507) | Q9NQC3            | Reticulon-4 (Neurite outgrowth inhibitor) (Nogo protein) (Focnen) (Neuroendocrine-specific protein) (NSP) (Neuroendocrine-specific protein C homolog) (RTN-x) (Reticulon-5) | apoptosis; integral to endoplasmic reticulum membrane; negative regulation of anti-apoptosis; negative regulation of axon extension; nuclear envelope; protein binding; regulation of apoptosis; regulation of cell migration                                          | Endoplasmic reticulum membrane; Multi-pass membrane protein.                                                                                                                                                                                           |                                   |
| 150 SC22B_HUMAN | SEC22B (SEC22L1)                        | O75396            | Vesicle-trafficking protein SEC22b (SEC22 vesicle-trafficking protein homolog B) (SEC22 vesicle-trafficking protein-like 1) (ERS24) (ERS24)                                 | ER to Golgi vesicle-mediated transport; ER-Golgi intermediate compartment membrane; Golgi membrane; endoplasmic reticulum membrane; integral to membrane; melanosome; protein binding; protein transport                                                               | Endoplasmic reticulum-Golgi intermediate compartment membrane; Single-pass type IV membrane protein. Golgi apparatus membrane; Single-pass type IV membrane protein. Endoplasmic reticulum membrane; Single-pass type IV membrane protein. Melanosome. | Synaptobrevin family              |
| 151 SCAM2_HUMAN | SCAMP2                                  | O15127            | Secretory carrier-associated membrane protein 2 (Secretory carrier membrane protein 2)                                                                                      | integral to membrane; post-Golgi vesicle-mediated transport; protein binding; protein transport; recycling endosome membrane; trans-Golgi network membrane                                                                                                             | Golgi apparatus, trans-Golgi network membrane; Multi-pass membrane protein. Recycling endosome membrane; Multi-pass membrane protein.                                                                                                                  | SCAMP family                      |
| 152 SCPDH_HUMAN | SCCPDH (CGI-49)                         | Q8NBX0            | Probable saccharopine dehydrogenase (EC 1.5.1.9)                                                                                                                            | binding; oxidation reduction; saccharopine dehydrogenase (NAD+, L-glutamate-forming) activity                                                                                                                                                                          |                                                                                                                                                                                                                                                        | Saccharopine dehydrogenase family |
| 153 SDPR_HUMAN  | SDPR                                    | O95810            | Serum deprivation-response protein (Phosphatidylserine-binding protein) (PS-p68)                                                                                            | caveola; cytosol; phosphatidylserine binding; protein binding                                                                                                                                                                                                          | Cytoplasm, cytosol. Membrane, caveola.                                                                                                                                                                                                                 | PTRF/SDPR family                  |
| 154 SEP11_HUMAN | 11-Sep                                  | Q9NVA2            | Septin-11                                                                                                                                                                   | GTP binding; cell cycle; cell division; nucleus; protein binding; protein heterooligomerization; septin complex; stress fiber                                                                                                                                          |                                                                                                                                                                                                                                                        | Septin family                     |
| 155 SEPT6_HUMAN | SEPT6 (KIAA0128) (SEP2)                 | Q14141            | Septin-6                                                                                                                                                                    | GTP binding; cell cycle; cytokinesis; nucleus; protein binding; septin complex                                                                                                                                                                                         |                                                                                                                                                                                                                                                        | Septin family                     |
| 156 SND1_HUMAN  | SND1 (TDRD11)                           | Q7KZF4            | Staphylococcal nuclease domain-containing protein 1 (p100 co-activator) (100 kDa coactivator) (EBNA2 coactivator p100) (Tudor domain-containing protein 11)                 | Golgi apparatus; RNA interference; RNA-induced silencing complex; interspecies interaction between organisms; melanosome; nuclease activity; nucleic acid binding; nucleus; regulation of transcription, DNA-dependent; transcription; transcription cofactor activity | Cytoplasm. Nucleus. Melanosome.                                                                                                                                                                                                                        |                                   |
| 157 SNP29_HUMAN | SNAP29                                  | O95721            | Synaptosomal-associated protein 29 (SNAP-29) (Vesicle-membrane fusion protein SNAP-29) (Soluble 29 kDa NSF attachment protein)                                              | SNAP receptor activity; cell junction; cytoplasm; exocytosis; membrane fusion; protein transport; synapse; synaptosome; vesicle targeting                                                                                                                              | Cytoplasm. Membrane; Peripheral membrane protein. Cell junction, synapse, synaptosome.                                                                                                                                                                 | SNAP-25 family                    |
| 158 SPCS1_HUMAN | SPCS1 (SPC12) (HSPC033)                 | Q9Y6A9            | Signal peptidase complex subunit 1 (EC 3.4.-.-) (Microsomal signal peptidase 12 kDa subunit) (SPase 12 kDa subunit)                                                         | integral to endoplasmic reticulum membrane; microsome; peptidase activity; proteolysis; signal peptidase complex; signal peptide processing                                                                                                                            | Microsome membrane; Multi-pass membrane protein. Endoplasmic reticulum membrane; Multi-pass membrane protein.                                                                                                                                          | SPCS1 family                      |
| 159 SSBP_HUMAN  | SSBP1 (SSBP)                            | Q04837            | Single-stranded DNA-binding protein, mitochondrial (Mt-SSB) (MtSSB) (PWP1-interacting protein 17)                                                                           | DNA replication; mitochondrial nucleoid; single-stranded DNA binding                                                                                                                                                                                                   | Mitochondrion.                                                                                                                                                                                                                                         |                                   |
| 160 STOM_HUMAN  | STOM (BND7) (EPB72)                     | P27105            | Erythrocyte band 7 integral membrane protein (Stomatin) (Protein 7.2b)                                                                                                      | cytoskeleton; integral to plasma membrane; melanosome; membrane raft; protein binding; protein homooligomerization                                                                                                                                                     | Cell membrane; Single-pass membrane protein; Cytoplasmic side. Cell membrane; Lipid-anchor; Cytoplasmic side. Melanosome.                                                                                                                              | Band 7/mec-2 family               |
| 161 STXB2_HUMAN | STXBP2 (UNC18B)                         | Q15833            | Syntaxin-binding protein 2 (Unc-18 homolog 2) (Unc18-2) (Unc-18B)                                                                                                           | intracellular protein transport; syntaxin-2 binding; syntaxin-3 binding; vesicle docking during exocytosis                                                                                                                                                             |                                                                                                                                                                                                                                                        | STXBP/unc-18/SEC1 family          |
| 162 TAGL2_HUMAN | TAGLN2 (KIAA0120) (CDABP0035)           | P37802            | Transgelin-2 (SM22-alpha homolog)                                                                                                                                           | cytoskeleton; muscle organ development; nuclear membrane; plasma membrane; protein binding                                                                                                                                                                             |                                                                                                                                                                                                                                                        | Calponin family                   |
| 163 TBA4A_HUMAN | TUBA4A (TUBA1)                          | P68366            | Tubulin alpha-4A chain (Tubulin alpha-1 chain) (Alpha-tubulin 1) (Testis-specific alpha-tubulin) (Tubulin H2-alpha)                                                         | GTP binding; GTPase activity; microtubule; microtubule-based movement; protein binding; protein complex; protein polymerization; structural molecule activity                                                                                                          |                                                                                                                                                                                                                                                        | Tubulin family                    |
| 164 TBB1_HUMAN  | TUBB1                                   | Q9H4B7            | Tubulin beta-1 chain                                                                                                                                                        | GTP binding; GTPase activity; microtubule; microtubule-based movement; protein complex; protein polymerization                                                                                                                                                         |                                                                                                                                                                                                                                                        | Tubulin family                    |
| 165 TBB2A_HUMAN | TUBB2A (TUBB2)                          | Q13885            | Tubulin beta-2A chain                                                                                                                                                       | GTP binding; GTPase activity; microtubule; microtubule-based movement; protein binding; protein complex; protein polymerization; structural molecule activity                                                                                                          |                                                                                                                                                                                                                                                        | Tubulin family                    |

| Entry name | Gene names  | Uniprot Accession      | Protein names | Gene Ontology                                                                                                                                                          | Subcellular Localization                                                                                                                                                                                                                                                                                                                                                                                                                                                                                                                                                                                                                                                                                                                                                                                                                                                                                                                                                                                 | Protein family                                                                                              |                                                        |
|------------|-------------|------------------------|---------------|------------------------------------------------------------------------------------------------------------------------------------------------------------------------|----------------------------------------------------------------------------------------------------------------------------------------------------------------------------------------------------------------------------------------------------------------------------------------------------------------------------------------------------------------------------------------------------------------------------------------------------------------------------------------------------------------------------------------------------------------------------------------------------------------------------------------------------------------------------------------------------------------------------------------------------------------------------------------------------------------------------------------------------------------------------------------------------------------------------------------------------------------------------------------------------------|-------------------------------------------------------------------------------------------------------------|--------------------------------------------------------|
| 166        | TCPG_HUMAN  | CCT3 (CCTG) (TRICS)    | P49368        | T-complex protein 1 subunit gamma (TCP-1-gamma) (CCT-gamma) (hTRIC5)                                                                                                   | ATP binding; cytoplasm; cytoskeleton; nucleus; plasma membrane; protein folding; unfolded protein binding                                                                                                                                                                                                                                                                                                                                                                                                                                                                                                                                                                                                                                                                                                                                                                                                                                                                                                | Cytoplasm.                                                                                                  | TCP-1 chaperonin family                                |
| 167        | TLN1_HUMAN  | TLN1 (KIAA1027) (TLN)  | Q9Y490        | Talin-1                                                                                                                                                                | LIM domain binding; actin binding; cell motion; cell-cell junction; cell-cell junction assembly; cytoplasm; cytoskeletal anchoring at plasma membrane; cytoskeleton; focal adhesion; intracellular membrane-bounded organelle; ruffle membrane; structural constituent of cytoskeleton; vinculin binding                                                                                                                                                                                                                                                                                                                                                                                                                                                                                                                                                                                                                                                                                                 | Cell projection , ruffle membrane; Peripheral membrane protein; Cytoplasmic side. Cytoplasm , cytoskeleton. |                                                        |
| 168        | TMEDA_HUMAN | TMED10 (TMP21)         | P49755        | Transmembrane emp24 domain-containing protein 10 (21 kDa transmembrane-trafficking protein) (Transmembrane protein Tmp21) (Tmp-21-1) (p24delta) (S31III125) (S31II125) | ER-Golgi intermediate compartment; Golgi membrane; cis-Golgi network; integral to membrane; melanosome; microsome; protein binding; protein transport; regulated secretory pathway; vesicle targeting, to, from or within Golgi; zymogen granule membrane                                                                                                                                                                                                                                                                                                                                                                                                                                                                                                                                                                                                                                                                                                                                                | Golgi apparatus membrane; Single-pass type I membrane protein; Luminal side. Melanosome.                    | EMP24/GP25L family                                     |
| 169        | TPM1_HUMAN  | TPM1 (C15orf13) (TMSA) | P09493        | Tropomyosin alpha-1 chain (Tropomyosin-1) (Alpha-tropomyosin)                                                                                                          | actin binding; bleb; cardiac muscle contraction; cell motion; cellular response to reactive oxygen species; muscle filament sliding; muscle thin filament tropomyosin; negative regulation of cell migration; positive regulation of ATPase activity; positive regulation of cell adhesion; positive regulation of heart rate by epinephrine; positive regulation of stress fiber formation; regulation of muscle contraction; ruffle membrane; ruffle organization; sarcomere organization; stress fiber; structural constituent of cytoskeleton; structural constituent of muscle; ventricular cardiac muscle morphogenesis; wound healing                                                                                                                                                                                                                                                                                                                                                             | Cytoplasm , cytoskeleton.                                                                                   | Tropomyosin family                                     |
| 170        | TPM3_HUMAN  | TPM3                   | P06753        | Tropomyosin alpha-3 chain (Tropomyosin-3) (Gamma-tropomyosin) (Tropomyosin-5) (hTM5)                                                                                   | actin binding; cell motion; muscle thin filament tropomyosin; regulation of muscle contraction                                                                                                                                                                                                                                                                                                                                                                                                                                                                                                                                                                                                                                                                                                                                                                                                                                                                                                           | Cytoplasm , cytoskeleton.                                                                                   | Tropomyosin family                                     |
| 171        | TPM4_HUMAN  | TPM4                   | P67936        | Tropomyosin alpha-4 chain (Tropomyosin-4) (TM30p1)                                                                                                                     | actin binding; calcium ion binding; cell motion; muscle thin filament tropomyosin; structural constituent of muscle                                                                                                                                                                                                                                                                                                                                                                                                                                                                                                                                                                                                                                                                                                                                                                                                                                                                                      | Cytoplasm , cytoskeleton.                                                                                   | Tropomyosin family                                     |
| 172        | TSP1_HUMAN  | THBS1 (TSP) (TSP1)     | P07996        | Thrombospondin-1                                                                                                                                                       | activation of MAPK activity; anti-apoptosis; calcium ion binding; cell adhesion; cell cycle arrest; cell migration; cellular response to heat; chronic inflammatory response; collagen V binding; engulfment of apoptotic cell; eukaryotic cell surface binding; external side of plasma membrane; extracellular matrix; fibrinogen binding; fibrinogen complex; fibroblast growth factor 2 binding; fibronectin binding; heparin binding; identical protein binding; immune response; integrin binding; laminin binding; low-density lipoprotein binding; negative regulation of angiogenesis; negative regulation of antigen processing and presentation of peptide or polysaccharide antigen via MHC class II; negative regulation of blood vessel endothelial cell migration; negative regulation of cGMP-mediated signaling; negative regulation of dendritic cell antigen processing and presentation; negative regulation of endothelial cell proliferation; negative regulation of fibrinolysis; |                                                                                                             | Thrombospondin family                                  |
| 173        | TSP3_HUMAN  | THBS3 (TSP3)           | P49746        | Thrombospondin-3                                                                                                                                                       | calcium ion binding; cell-matrix adhesion; extracellular region; platelet alpha granule lumen; protein binding; structural molecule activity                                                                                                                                                                                                                                                                                                                                                                                                                                                                                                                                                                                                                                                                                                                                                                                                                                                             |                                                                                                             | Thrombospondin family                                  |
| 174        | TWF2_HUMAN  | TWF2 (PTK9L) (MSTP011) | Q6IBS0        | Twinfilin-2 (Twinfilin-1-like protein) (A6-related protein) (hA6RP) (Protein tyrosine kinase 9-like)                                                                   | ATP binding; actin binding; cytoskeleton; perinuclear region of cytoplasm                                                                                                                                                                                                                                                                                                                                                                                                                                                                                                                                                                                                                                                                                                                                                                                                                                                                                                                                | Cytoplasm , cytoskeleton. Cytoplasm , perinuclear region.                                                   | Actin-binding proteins ADF family, Twinfilin subfamily |

| Entry name      | Gene names                    | Uniprot Accession | Protein names                                                                                                                                                                                                | Gene Ontology                                                                                                                                                                                                                                                                                                                                                                                          | Subcellular Localization                                                                                                   | Protein family                        |
|-----------------|-------------------------------|-------------------|--------------------------------------------------------------------------------------------------------------------------------------------------------------------------------------------------------------|--------------------------------------------------------------------------------------------------------------------------------------------------------------------------------------------------------------------------------------------------------------------------------------------------------------------------------------------------------------------------------------------------------|----------------------------------------------------------------------------------------------------------------------------|---------------------------------------|
| 175 UBP7_HUMAN  | USP7 (HAUSP)                  | Q93009            | Ubiquitin carboxyl-terminal hydrolase 7 (EC 3.1.2.15) (Ubiquitin thioesterase 7) (Ubiquitin-specific-processing protease 7) (Deubiquitinating enzyme 7) (Herpesvirus-associated ubiquitin-specific protease) | cysteine-type endopeptidase activity; interspecies interaction between organisms; nucleus; protein C-terminus binding; protein deubiquitination; ubiquitin thioesterase activity; ubiquitin-dependent protein catabolic process; ubiquitin-specific protease activity                                                                                                                                  | Nucleus.                                                                                                                   | Peptidase C19 family                  |
| 176 UBS3B_HUMAN | UBASH3B (KIAA1959) (STS1)     | Q8TF42            | Ubiquitin-associated and SH3 domain-containing protein B (Suppressor of T-cell receptor signaling 1) (STS-1) (Cbl-interacting protein p70)                                                                   | cytoplasm; nucleus                                                                                                                                                                                                                                                                                                                                                                                     | Cytoplasm. Nucleus.                                                                                                        |                                       |
| 177 URP2_HUMAN  | FERMT3 (KIND3) (MIG2B) (URP2) | Q86UX7            | Fermitin family homolog 3 (Unc-112-related protein 2) (Kindlin-3) (MIG2-like protein)                                                                                                                        | cell adhesion; cytoplasm; plasma membrane; protein binding                                                                                                                                                                                                                                                                                                                                             | Cytoplasm. Cell membrane; Peripheral membrane protein; Cytoplasmic side.                                                   | Kindlin family                        |
| 178 VDAC1_HUMAN | VDAC1 (VDAC)                  | P21796            | Voltage-dependent anion-selective channel protein 1 (VDAC-1) (hVDAC1) (Outer mitochondrial membrane protein porin 1) (Plasmalemmal porin) (Porin 31HL) (Porin 31HM)                                          | anion transport; apoptosis; interspecies interaction between organisms; mitochondrial nucleoid; mitochondrial outer membrane; plasma membrane; pore complex; protein binding; voltage-gated anion channel activity                                                                                                                                                                                     | Mitochondrion outer membrane. Cell membrane.                                                                               | Eukaryotic mitochondrial porin family |
| 179 VDAC3_HUMAN | VDAC3                         | Q9Y277            | Voltage-dependent anion-selective channel protein 3 (VDAC-3) (hVDAC3) (Outer mitochondrial membrane protein porin 3)                                                                                         | adenine transport; anion transport; integral to membrane; mitochondrial outer membrane; nucleotide binding; protein binding; voltage-gated anion channel activity                                                                                                                                                                                                                                      | Mitochondrion outer membrane.                                                                                              | Eukaryotic mitochondrial porin family |
| 180 VINC_HUMAN  | VCL                           | P18206            | Vinculin (Metavinculin)                                                                                                                                                                                      | actin binding; actin cytoskeleton; alpha-catenin binding; apical junction assembly; cell adhesion; cell motion; cell-cell junction; costamere; focal adhesion; lamellipodium assembly; negative regulation of cell migration; oxidoreductase activity; protein complex; structural molecule activity                                                                                                   | Cytoplasm , cytoskeleton. Cell junction , adherens junction. Cell membrane; Peripheral membrane protein; Cytoplasmic side. | Vinculin/alpha-catenin family         |
| 181 VWF_HUMAN   | VWF (F8VWF)                   | P04275            | von Willebrand factor (vWF) [Cleaved into: von Willebrand antigen 2 (von Willebrand antigen II)]                                                                                                             | Weibel-Palade body; cell-substrate adhesion; chaperone binding; collagen binding; endoplasmic reticulum; extracellular space; glycoprotein binding; immunoglobulin binding; integrin binding; nucleolus; platelet activation; platelet alpha granule; protease binding; protein N-terminus binding; protein homodimerization activity; protein homooligomerization; proteinaceous extracellular matrix | Secreted. Secreted , extracellular space , extracellular matrix.                                                           |                                       |
| 182 WASF2_HUMAN | WASF2 (WAVE2)                 | Q9Y6W5            | Wiskott-Aldrich syndrome protein family member 2 (WASP family protein member 2) (Protein WAVE-2) (Verprolin homology domain-containing protein 2)                                                            | G-protein signaling, coupled to cAMP nucleotide second messenger; actin binding; actin cytoskeleton; actin cytoskeleton organization; cytoplasm; lamellipodium                                                                                                                                                                                                                                         | Cytoplasm , cytoskeleton. Cell projection , lamellipodium.                                                                 | SCAR/WAVE family                      |
