# Supplementary material for: Proteomic and Phospho-Proteomic Profile of Human Platelets in Basal, Resting State: Insights into Integrin Signaling
Source: PubMed Central journal article supplement (PMC2762604; doi:10.1371/journal.pone.0007627), 2009-10-27
Supplement: pone.0007627.s009.pdf [file pone.0007627.s009.pdf]

| Reference<br>File, Scan(s)                 | Peptide                                      | MH+        | z | P (pro)<br>P (pep) | Sf    | Score<br>XC | Coverage | MW<br>Sp |
|--------------------------------------------|----------------------------------------------|------------|---|--------------------|-------|-------------|----------|----------|
| gjl16753233[ref]NP_006280.2[ Homo sapiens] |                                              |            |   | 2.78E-15           | 35.56 | 430.32      | 25.70    | 269665.3 |
| PM-3, 2187                                 | R.AAM*EPIVISA.K                              | 1146.38260 | 1 | 2.29E-04           | 0.11  | 1.99        | -        | 194.9    |
| PM-1, 6479                                 | K.AQEACGPLEMDSALSVVQNLK.D                    | 2390.67685 | 2 | 4.29E-06           | 0.93  | 3.95        | -        | 1327.0   |
| PM-4, 6309                                 | K.AQEACGPLEMDSALSVVQNLK.D                    | 2390.67685 | 2 | 6.12E-10           | 0.92  | 4.37        | -        | 944.6    |
| PM-4, 2250 - 2252                          | K.ASAGPOLLVQSK.A                             | 1456.69283 | 1 | 1.32E-04           | 0.19  | 2.17        | -        | 338.0    |
| PM-2, 3867 - 3906                          | K.ASVPTIQDQASAMQLSQCAK.N                     | 2135.40852 | 2 | 6.98E-06           | 0.88  | 3.61        | -        | 742.0    |
| PM-3, 5303 - 5359                          | R.AVTDINQLITMCTQQAPGQK.E                     | 2305.61832 | 2 | 2.26E-04           | 0.68  | 2.93        | -        | 526.7    |
| PM-1, 5621                                 | R.AVTDINQLITMCTQQAPGQK.E                     | 2305.61832 | 2 | 3.35E-06           | 0.87  | 3.93        | -        | 650.3    |
| PM-1, 5237 - 5239                          | R.AVTDINQLITM*CTQQAPGQK.E                    | 2321.61772 | 2 | 1.57E-04           | 0.87  | 3.98        | -        | 555.5    |
| PM-5, 5326 - 5353                          | R.AVTDINQLITMCTQQAPGQK.E                     | 2305.61832 | 2 | 1.05E-05           | 0.46  | 3.08        | -        | 322.1    |
| PM-8, 4588                                 | K.DHFGLEGDEESTMLEDSVSPK.K                    | 2323.43307 | 2 | 2.18E-04           | 0.93  | 3.94        | -        | 1485.3   |
| PM-1, 5491                                 | R.DKAPGQLECEETAIAALNSCLR.D                   | 2318.61684 | 2 | 1.90E-09           | 0.92  | 3.71        | -        | 1095.1   |
| PM-8, 5136                                 | R.DKAPGQLECEETAIAALNSCLR.D                   | 2318.61684 | 2 | 8.25E-04           | 0.41  | 2.52        | -        | 425.3    |
| PM-4, 4373                                 | R.DKAPGQLECEETAIAALNSCLR.D                   | 2318.61684 | 2 | 2.02E-04           | 0.53  | 2.72        | -        | 484.7    |
| PM-4, 5041                                 | R.DKAPGQLECEETAIAALNSCLR.D                   | 2318.61684 | 2 | 4.09E-09           | 0.89  | 3.83        | -        | 772.0    |
| PM-2, 5109                                 | R.DKAPGQLECEETAIAALNSCLR.D                   | 2318.61684 | 2 | 9.50E-12           | 0.91  | 4.27        | -        | 879.2    |
| PM-1, 4801                                 | R.DKAPGQLECEETAIAALNSCLR.D                   | 2318.61684 | 2 | 2.78E-15           | 0.93  | 4.13        | -        | 943.8    |
| PM-3, 5104                                 | R.DKAPGQLECEETAIAALNSCLR.D                   | 2318.61684 | 2 | 9.28E-06           | 0.82  | 3.28        | -        | 694.1    |
| PM-5, 2210 - 2218                          | K.EAAYHPEVAPDVR.L                            | 1454.56910 | 1 | 2.78E-05           | 0.68  | 2.57        | -        | 553.8    |
| PM-9, 5755 - 5823                          | K.EADESLNFEQILEAAK.S                         | 1937.05072 | 2 | 3.77E-04           | 0.85  | 3.87        | -        | 870.1    |
| PM-8, 5760 - 5827                          | K.EADESLNFEQILEAAK.S                         | 1937.05072 | 2 | 8.87E-07           | 0.94  | 4.02        | -        | 1395.7   |
| PM-4, 5862                                 | K.EADESLNFEQILEAAK.S                         | 1937.05072 | 2 | 4.53E-06           | 0.74  | 3.22        | -        | 742.3    |
| PM-2, 5877 - 5881                          | K.EADESLNFEQILEAAK.S                         | 1937.05072 | 2 | 3.06E-04           | 0.94  | 4.18        | -        | 1597.0   |
| PM-1, 6128 - 6205                          | K.EADESLNFEQILEAAK.S                         | 1937.05072 | 2 | 5.27E-09           | 0.97  | 5.34        | -        | 1868.6   |
| PM-3, 6480                                 | R.ECANGYLELLDHLVLLTKQKSPKEL.Q                | 2882.32426 | 3 | 8.40E-04           | 0.84  | 4.03        | -        | 848.6    |
| PM-1, 6629                                 | R.EGISQALHTQM*LTAVQEISHLIEPLANAAR.A          | 3388.79744 | 3 | 6.72E-04           | 0.76  | 3.26        | -        | 613.8    |
| PM-3, 6527 - 6529                          | R.EGISQALHTQMLTAVQEISHLIEPLANAAR.A           | 3372.79804 | 3 | 4.53E-11           | 0.96  | 5.87        | -        | 1364.5   |
| PM-2, 6530                                 | R.EGISQALHTQM*LTAVQEISHLIEPLANAAR.A          | 3388.79744 | 3 | 7.43E-04           | 0.82  | 4.00        | -        | 695.8    |
| PM-3, 6447 - 6448                          | R.EGISQALHTQM*LTAVQEISHLIEPLANAAR.A          | 3388.79744 | 3 | 1.04E-08           | 0.91  | 4.83        | -        | 880.2    |
| PM-4, 6488                                 | R.EGISQALHTQMLTAVQEISHLIEPLANAAR.A           | 3372.79804 | 3 | 5.43E-06           | 0.87  | 4.24        | -        | 954.9    |
| PM-9, 5937                                 | K.FFYSDQNVDSRDPVQLNLLVQAR.D                  | 2889.17074 | 3 | 1.48E-04           | 0.95  | 4.02        | -        | 1842.3   |
| PM-5, 6278                                 | R.FGQDFSTFLEAGVEMAGQAPSQEDR.A                | 2718.89325 | 2 | 6.82E-08           | 0.90  | 4.01        | -        | 778.7    |
| PM-6, 6199                                 | R.GSQAQPDSPSAQLALIAAQSFLQPGGK.M              | 2756.02103 | 2 | 8.12E-05           | 0.61  | 3.35        | -        | 314.4    |
| PM-3, 6355                                 | R.GSQAQPDSPSAQLALIAAQSFLQPGGK.M              | 2756.02103 | 2 | 3.32E-06           | 0.89  | 4.51        | -        | 606.8    |
| PM-1, 6476                                 | R.GSQAQPDSPSAQLALIAAQSFLQPGGK.M              | 2756.02103 | 2 | 1.38E-08           | 0.97  | 5.47        | -        | 1270.6   |
| PM-5, 6224                                 | R.GSQAQPDSPSAQLALIAAQSFLQPGGK.M              | 2756.02103 | 2 | 3.59E-04           | 0.93  | 4.42        | -        | 825.9    |
| PM-4, 6412                                 | R.GVAALTSDDPAVQIVLDTASDVLDK.A                | 2470.75835 | 2 | 2.43E-07           | 0.95  | 6.01        | -        | 735.4    |
| PM-1, 6559 - 6617                          | R.GVAALTSDDPAVQIVLDTASDVLDK.A                | 2470.75835 | 2 | 3.18E-06           | 0.97  | 6.29        | -        | 994.9    |
| PM-2, 6529                                 | R.GVAALTSDDPAVQIVLDTASDVLDK.A                | 2470.75835 | 2 | 8.11E-07           | 0.93  | 4.98        | -        | 603.1    |
| PM-5, 6361                                 | R.GVGAATAVQALNELLQHVK.A                      | 2092.38495 | 2 | 5.31E-04           | 0.32  | 2.82        | -        | 206.9    |
| PM-4, 6462 - 6465                          | R.GVGAATAVQALNELLQHVK.A                      | 2092.38495 | 2 | 7.61E-06           | 0.91  | 4.41        | -        | 736.5    |
| PM-1, 6204                                 | R.IPEAPAGPPSDFGLFLSDDDPK.K                   | 2286.47890 | 2 | 1.13E-04           | 0.56  | 3.18        | -        | 440.2    |
| PM-11, 5461 - 5516                         | R.IPEAPAGPPSDFGLFLSDDDPK.K                   | 2414.65181 | 3 | 1.68E-04           | 0.85  | 3.40        | -        | 1067.0   |
| PM-2, 2886 - 2897                          | R.LASEAKPAVAEAENEIEGSHIK.H                   | 2236.46779 | 3 | 1.71E-04           | 0.91  | 4.30        | -        | 1063.8   |
| PM-4, 2716 - 2721                          | R.LASEAKPAVAEAENEIEGSHIK.H                   | 2236.46779 | 3 | 4.75E-04           | 0.86  | 3.62        | -        | 1106.4   |
| PM-1, 3267                                 | R.LASEAKPAVAEAENEIEGSHIK.H                   | 2236.46779 | 3 | 8.11E-08           | 0.97  | 5.98        | -        | 1934.1   |
| PM-3, 2799                                 | R.LASEAKPAVAEAENEIEGSHIK.H                   | 2236.46779 | 3 | 3.98E-04           | 0.91  | 3.51        | -        | 1623.1   |
| PM-4, 5388                                 | K.LGAASLGAEDPETQVLLINAVK.D                   | 2196.48671 | 2 | 5.20E-04           | 0.48  | 2.52        | -        | 387.6    |
| PM-11, 5393                                | K.LGAASLGAEDPETQVLLINAVK.D                   | 2196.48671 | 2 | 9.94E-05           | 0.65  | 2.51        | -        | 686.4    |
| PM-4, 5168 - 5224                          | K.LGAASLGAEDPETQVLLINAVK.D                   | 2196.48671 | 2 | 1.50E-07           | 0.90  | 4.14        | -        | 906.6    |
| PM-3, 5036 - 5056                          | K.LGAASLGAEDPETQVLLINAVK.D                   | 2196.48671 | 2 | 4.87E-05           | 0.60  | 2.87        | -        | 587.1    |
| PM-10, 5337 - 5339                         | K.LGAASLGAEDPETQVLLINAVK.D                   | 2196.48671 | 2 | 2.57E-04           | 0.87  | 3.38        | -        | 907.8    |
| PM-3, 5235                                 | K.LGAASLGAEDPETQVLLINAVK.D                   | 2196.48671 | 2 | 6.90E-04           | 0.88  | 3.66        | -        | 826.0    |
| PM-5, 5310 - 5390                          | K.LGAASLGAEDPETQVLLINAVK.D                   | 2196.48671 | 2 | 9.28E-04           | 0.89  | 3.54        | -        | 937.6    |
| PM-9, 5200 - 5271                          | K.LGAASLGAEDPETQVLLINAVK.D                   | 2196.48671 | 2 | 9.94E-06           | 0.94  | 4.66        | -        | 882.1    |
| PM-8, 5243 - 5251                          | K.LGAASLGAEDPETQVLLINAVK.D                   | 2196.48671 | 2 | 1.24E-05           | 0.77  | 3.35        | -        | 584.0    |
| PM-4, 4984 - 4992                          | K.LGAASLGAEDPETQVLLINAVK.D                   | 2196.48671 | 2 | 2.39E-06           | 0.93  | 4.62        | -        | 774.9    |
| PM-5, 5096 - 5114                          | K.LGAASLGAEDPETQVLLINAVK.D                   | 2196.48671 | 2 | 3.57E-04           | 0.92  | 4.24        | -        | 991.3    |
| PM-1, 5721 - 5780                          | K.LGAASLGAEDPETQVLLINAVK.D                   | 2196.48671 | 2 | 7.21E-05           | 0.82  | 3.74        | -        | 505.0    |
| PM-5, 5277 - 5346                          | K.LGAASLGAEDPETQVLLINAVK.D                   | 2196.48671 | 2 | 2.57E-04           | 0.92  | 4.12        | -        | 941.1    |
| PM-2, 5247 - 5307                          | K.LGAASLGAEDPETQVLLINAVK.D                   | 2196.48671 | 2 | 5.66E-08           | 0.95  | 4.57        | -        | 1092.8   |
| PM-1, 5587 - 5588                          | K.LGAASLGAEDPETQVLLINAVK.D                   | 2196.48671 | 2 | 8.60E-04           | 0.94  | 4.74        | -        | 975.9    |
| PM-6, 4863 - 4868                          | K.LGAASLGAEDPETQVLLINAVK.D                   | 2196.48671 | 2 | 1.29E-04           | 0.80  | 2.90        | -        | 690.0    |
| PM-8, 3344 - 3404                          | K.LHTDDELNWLHDHGR.T                          | 1721.81153 | 2 | 3.37E-06           | 0.93  | 4.29        | -        | 906.9    |
| PM-6, 3170 - 3227                          | K.LHTDDELNWLHDHGR.T                          | 1721.81153 | 2 | 1.15E-04           | 0.92  | 3.81        | -        | 886.5    |
| PM-11, 5260 - 5283                         | K.LLAALLEDEGGSGRPLLQAAK.G                    | 2123.43896 | 2 | 2.66E-08           | 0.97  | 5.34        | -        | 1211.8   |
| PM-8, 5008 - 5026                          | K.LLAALLEDEGGSGRPLLQAAK.G                    | 2123.43896 | 2 | 4.70E-06           | 0.76  | 3.80        | -        | 613.5    |
| PM-4, 4864                                 | K.LLAALLEDEGGSGRPLLQAAK.G                    | 2123.43896 | 2 | 4.59E-05           | 0.69  | 3.45        | -        | 575.1    |
| PM-1, 5424                                 | K.LLAALLEDEGGSGRPLLQAAK.G                    | 2123.43896 | 2 | 1.27E-04           | 0.89  | 3.59        | -        | 950.1    |
| PM-2, 4978 - 5017                          | K.LLAALLEDEGGSGRPLLQAAK.G                    | 2123.43896 | 2 | 7.92E-04           | 0.96  | 3.56        | -        | 847.2    |
| PM-3, 3753                                 | R.MVAATNMLCEAANAQVGHASQEK.L                  | 2557.80618 | 2 | 3.40E-04           | 0.56  | 2.98        | -        | 277.0    |
| PM-3, 2319                                 | K.PAAVAENEIEGSHIK.H                          | 1636.78798 | 2 | 5.80E-06           | 0.96  | 4.71        | -        | 1288.4   |
| PM-2, 2390                                 | K.PAAVAENEIEGSHIK.H                          | 1636.78798 | 2 | 1.09E-05           | 0.98  | 5.56        | -        | 2382.7   |
| PM-2, 6549                                 | R.QNLLQAAAGNVGQASGELLQQIGESDTPHFQDALMQLAK.A  | 4138.52644 | 3 | 3.02E-08           | 0.94  | 5.94        | -        | 669.3    |
| PM-3, 6471                                 | R.QNLLQAAAGNVGQASGELLQQIGESDTPHFQDALMQLAK.A  | 4138.52644 | 3 | 7.75E-11           | 0.96  | 6.35        | -        | 828.8    |
| PM-2, 6534                                 | R.QNLLQAAAGNVGQASGELLQQIGESDTPHFQDALM*QLAK.A | 4154.52584 | 3 | 1.12E-07           | 0.83  | 4.15        | -        | 479.7    |
| PM-3, 6455                                 | R.QNLLQAAAGNVGQASGELLQQIGESDTPHFQDALM*QLAK.A | 4154.52584 | 3 | 2.48E-05           | 0.82  | 4.43        | -        | 509.0    |
| PM-4, 6436                                 | R.QNLLQAAAGNVGQASGELLQQIGESDTPHFQDALMQLAK.A  | 4138.52644 | 3 | 2.31E-07           | 0.92  | 4.66        | -        | 905.8    |
| PM-3, 5589                                 | K.RVAGSVTELIQAAEAMK.G                        | 1775.06387 | 2 | 5.64E-05           | 0.90  | 3.65        | -        | 1013.6   |
| PM-5, 5728                                 | K.RVAGSVTELIQAAEAMK.G                        | 1775.06387 | 2 | 1.35E-04           | 0.98  | 5.13        | -        | 2318.6   |
| PM-3, 4117                                 | K.SKDHFLEGDEESTMLEDSVSPK.K                   | 2538.68364 | 2 | 1.56E-04           | 0.83  | 3.32        | -        | 725.7    |
| PM-2, 4185                                 | K.SKDHFLEGDEESTMLEDSVSPK.K                   | 2538.68364 | 2 | 1.09E-04           | 0.85  | 3.56        | -        | 947.6    |
| PM-2, 5010 - 5015                          | K.SNTSPEELGPLANQLTSDYGR.L                    | 2250.36505 | 2 | 3.55E-05           | 0.56  | 3.02        | -        | 322.9    |
| PM-1, 5340 - 5399                          | K.SNTSPEELGPLANQLTSDYGR.L                    | 2250.36505 | 2 | 4.12E-05           | 0.74  | 3.34        | -        | 349.9    |
| PM-9, 4017 - 4072                          | K.TKEVIQEWLNTNIK.R                           | 1716.95938 | 2 | 1.14E-06           | 0.91  | 3.48        | -        | 1330.7   |
| PM-2, 2866 - 2873                          | K.TLSHPQQMALLDQTK.T                          | 1711.96464 | 2 | 1.53E-05           | 0.66  | 3.03        | -        | 419.3    |
| PM-1, 6439                                 | R.VAGSVTELIQAAEAMK.G                         | 1618.87752 | 2 | 6.89E-07           | 0.97  | 5.15        | -        | 1501.1   |
| PM-1, 5469 - 5471                          | R.VAGSVTELIQAAEAM*K.G                        | 1634.87692 | 2 | 2.90E-05           | 0.76  | 3.07        | -        | 667.6    |
| PM-5, 5693 - 5698                          | K.VGAIPANALDDGQWSQGLISAAR.M                  | 2311.53959 | 2 | 2.42E-04           | 0.81  | 3.54        | -        | 338.1    |
| PM-1, 6227                                 | K.VGAIPANALDDGQWSQGLISAAR.M                  | 2311.53959 | 2 | 3.95E-04           | 0.84  | 3.52        | -        | 505.2    |
| PM-1, 6111                                 | K.VGAIPANALDDGQWSQGLISAAR.M                  | 2311.53959 | 2 | 1.18E-09           | 0.93  | 4.43        | -        | 755.2    |
| PM-10, 5831                                | K.VGAIPANALDDGQWSQGLISAAR.M                  | 2311.53959 | 2 | 5.02E-05           | 0.68  | 2.89        | -        | 359.2    |
| PM-5, 5776                                 | K.VGAIPANALDDGQWSQGLISAAR.M                  | 2311.53959 | 2 | 1.98E-06           | 0.89  | 3.90        | -        | 613.0    |
| PM-9, 5673 - 5748                          | K.VGAIPANALDDGQWSQGLISAAR.M                  | 2311.53959 | 2 | 3.15E-09           | 0.94  | 4.23        | -        | 1203.9   |
| PM-4, 5653 - 5729                          | K.VGAIPANALDDGQWSQGLISAAR.M                  | 2311.53959 | 2 | 4.74E-07           | 0.93  | 4.68        | -        | 817.3    |
| PM-1, 6021                                 | K.VGAIPANALDDGQWSQGLISAAR.M                  | 2311.53959 | 2 | 5.67E-07           | 0.91  | 3.89        | -        | 544.7    |
| PM-3, 5692 - 5751                          | K.VGAIPANALDDGQWSQGLISAAR.M                  | 2311.53959 | 2 | 1.91E-09           | 0.95  | 5.05        | -        | 763.6    |
| PM-2, 5790 - 5862                          | K.VGAIPANALDDGQWSQGLISAAR.M                  | 2311.53959 | 2 | 9.00E-06           | 0.92  | 4.90        | -        | 587.8    |
| PM-5, 3470 - 3472                          | K.VGDDPAVVQLK.N                              | 1228.37879 | 2 | 2.20E-04           | 0.93  | 4.08        | -        | 1073.3   |
| PM-1, 3811 - 3812                          | K.VGDDPAVVQLK.N                              | 1228.37879 | 2 | 1.74E-08           | 0.92  | 3.72        | -        | 859.2    |
| PM-3, 2757                                 | K.VLGEAMTGISQNAK.N                           | 1419.62961 | 1 | 4.16E-05           | 0.84  | 3.46        | -        | 469.5    |
| PM-1, 4435                                 | K.VM*VTNVTSLK.T                              | 1221.49262 | 2 | 1.38E-04           | 0.84  | 3.44        | -        | 751.7    |
| PM-2, 2239                                 | K.VSHVLAALQAGNR.G                            | 1336.52525 | 1 | 5.33E-05           | 0.50  | 2.42        | -        | 438.8    |
| PM-5, 2417 - 2420                          | K.VSHV                                       |            |   |                    |       |             |          |          |

|                                                                                                   |                                                 |            |   |          |       |        |       |          |
|---------------------------------------------------------------------------------------------------|-------------------------------------------------|------------|---|----------|-------|--------|-------|----------|
| PM-2, 6441                                                                                        | K.VSQMAQYFELPLTAAVGAASK.T                       | 2183.51313 | 2 | 1.71E-05 | 0.95  | 5.14   | -     | 901.0    |
| PM-1, 6095                                                                                        | K.VSQM*AQYFELPLTAAVGAASK.T                      | 2199.51253 | 2 | 4.69E-04 | 0.93  | 4.19   | -     | 1096.1   |
| PM-5, 6169 - 6242                                                                                 | K.VSQMAQYFELPLTAAVGAASK.T                       | 2183.51313 | 2 | 1.09E-04 | 0.89  | 4.04   | -     | 582.0    |
| PM-5, 5732 - 5733                                                                                 | K.VSQM*AQYFELPLTAAVGAASK.T                      | 2199.51253 | 2 | 9.66E-05 | 0.88  | 4.23   | -     | 553.5    |
| PM-9, 6227                                                                                        | K.VSQMAQYFELPLTAAVGAASK.T                       | 2183.51313 | 2 | 8.39E-05 | 0.96  | 4.90   | -     | 1161.2   |
| PM-3, 5669 - 5687                                                                                 | K.VSQM*AQYFELPLTAAVGAASK.T                      | 2199.51253 | 2 | 2.34E-04 | 0.88  | 4.04   | -     | 727.8    |
| PM-3, 6371 - 6375                                                                                 | K.VSQMAQYFELPLTAAVGAASK.T                       | 2183.51313 | 2 | 1.33E-05 | 0.93  | 4.74   | -     | 794.2    |
| PM-4, 6330 - 6337                                                                                 | K.VSQMAQYFELPLTAAVGAASK.T                       | 2183.51313 | 2 | 7.78E-05 | 0.94  | 4.58   | -     | 931.6    |
| PM-6, 6214 - 6215                                                                                 | K.VSQMAQYFELPLTAAVGAASK.T                       | 2183.51313 | 2 | 1.28E-04 | 0.93  | 4.46   | -     | 812.3    |
| PM-4, 4094 - 4152                                                                                 | K.VVAPTISSPVCQEQLVEAGR.L                        | 2141.43439 | 2 | 6.36E-04 | 0.81  | 3.61   | -     | 598.7    |
| PM-3, 4221 - 4231                                                                                 | K.VVAPTISSPVCQEQLVEAGR.L                        | 2141.43439 | 2 | 1.59E-04 | 0.84  | 3.78   | -     | 488.6    |
| PM-8, 4170                                                                                        | K.VVAPTISSPVCQEQLVEAGR.L                        | 2141.43439 | 2 | 8.87E-04 | 0.44  | 2.88   | -     | 143.0    |
| PM-2, 4261                                                                                        | K.VVAPTISSPVCQEQLVEAGR.L                        | 2141.43439 | 2 | 5.59E-05 | 0.31  | 2.54   | -     | 233.2    |
| PM-5, 4174 - 4232                                                                                 | K.VVAPTISSPVCQEQLVEAGR.L                        | 2141.43439 | 2 | 3.40E-05 | 0.84  | 3.88   | -     | 479.4    |
| gj4503689 ref NP_000499.1 fibrinogen, alpha chain isoform alpha-E preproprotein [Homo sapiens] [M |                                                 |            |   | 2.83E-14 | 7.47  | 100.25 | 19.60 | 94972.5  |
| PM-6, 5208 - 5279                                                                                 | K.DSDWPFCSDEDWNYK.C                             | 1965.00129 | 2 | 7.73E-04 | 0.83  | 3.27   | -     | 462.1    |
| PM-10, 5407 - 5479                                                                                | K.DSDWPFCSDEDWNYK.C                             | 1965.00129 | 2 | 6.04E-07 | 0.81  | 3.13   | -     | 586.9    |
| PM-7, 5137 - 5203                                                                                 | K.DSDWPFCSDEDWNYK.C                             | 1965.00129 | 2 | 5.60E-06 | 0.84  | 3.40   | -     | 426.0    |
| PM-11, 5484                                                                                       | K.DSDWPFCSDEDWNYK.C                             | 1965.00129 | 2 | 7.09E-05 | 0.82  | 3.19   | -     | 545.2    |
| PM-5, 5697                                                                                        | K.DSHSLTNIMEILR.G                               | 1630.84839 | 2 | 2.82E-05 | 0.71  | 2.88   | -     | 533.7    |
| PM-1, 6048 - 6051                                                                                 | K.DSHSLTNIMEILR.G                               | 1630.84839 | 2 | 2.06E-04 | 0.96  | 4.68   | -     | 1195.3   |
| PM-7, 5237                                                                                        | K.DSHSLTNIMEILR.G                               | 1630.84839 | 2 | 3.01E-04 | 0.88  | 3.16   | -     | 978.3    |
| PM-8, 5534 - 5591                                                                                 | K.DSHSLTNIMEILR.G                               | 1630.84839 | 2 | 9.44E-05 | 0.81  | 3.66   | -     | 590.8    |
| PM-8, 2278 - 2352                                                                                 | R.EVDLKDYEQQK.Q                                 | 1510.58460 | 2 | 5.87E-06 | 0.75  | 3.04   | -     | 610.2    |
| PM-1, 2631                                                                                        | R.EVDLKDYEQQK.Q                                 | 1510.58460 | 2 | 4.63E-07 | 0.76  | 2.75   | -     | 617.5    |
| PM-3, 2285                                                                                        | R.MELERPGNEITR.G                                | 1502.67870 | 2 | 6.64E-04 | 0.75  | 3.48   | -     | 464.9    |
| PM-7, 2796                                                                                        | R.NPGSSGTGGTATWKPSSSGPGSTGWSNSGSSGTSTGNQNPSPR.P | 4123.15285 | 3 | 3.41E-06 | 0.72  | 3.66   | -     | 791.7    |
| PM-1, 3396 - 3469                                                                                 | R.NPGSSGTGGTATWKPSSSGPGSTGWSNSGSSGTSTGNQNPSPR.P | 4123.15285 | 3 | 5.19E-05 | 0.85  | 3.94   | -     | 845.4    |
| PM-2, 1713                                                                                        | R.NPSSAGSWSNSGSSGPGSTGNR.N                      | 1964.94443 | 2 | 1.28E-07 | 0.66  | 2.59   | -     | 576.2    |
| PM-7, 1705                                                                                        | R.NPSSAGSWSNSGSSGPGSTGNR.N                      | 1964.94443 | 2 | 1.51E-05 | 0.91  | 3.82   | -     | 980.5    |
| PM-7, 1803                                                                                        | R.NPSSAGSWSNSGSSGPGSTGNR.N                      | 1964.94443 | 2 | 2.83E-14 | 0.93  | 4.51   | -     | 687.5    |
| PM-5, 1941 - 2004                                                                                 | R.NPSSAGSWSNSGSSGPGSTGNR.N                      | 1964.94443 | 2 | 3.84E-07 | 0.96  | 4.38   | -     | 1458.5   |
| PM-8, 2000                                                                                        | R.NPSSAGSWSNSGSSGPGSTGNR.N                      | 1964.94443 | 2 | 1.40E-07 | 0.58  | 3.03   | -     | 313.4    |
| PM-3, 1784                                                                                        | R.NPSSAGSWSNSGSSGPGSTGNR.N                      | 1964.94443 | 2 | 1.17E-04 | 0.71  | 3.28   | -     | 467.6    |
| PM-6, 1679                                                                                        | R.NPSSAGSWSNSGSSGPGSTGNR.N                      | 1964.94443 | 2 | 2.61E-05 | 0.75  | 2.68   | -     | 718.4    |
| PM-8, 1886                                                                                        | R.NPSSAGSWSNSGSSGPGSTGNR.N                      | 1964.94443 | 2 | 9.85E-06 | 0.96  | 4.90   | -     | 1121.5   |
| PM-1, 4872 - 4931                                                                                 | R.PNNPDWGTFFEEVSGNVSPGTR.R                      | 2261.34962 | 2 | 3.67E-05 | 0.90  | 4.30   | -     | 794.9    |
| PM-3, 6476                                                                                        | K.TFPGFSPMLGEFVSETESR.G                         | 2266.51432 | 2 | 2.52E-04 | 0.67  | 3.00   | -     | 404.0    |
| PM-1, 6583 - 6589                                                                                 | K.TFPGFSPMLGEFVSETESR.G                         | 2266.51432 | 2 | 1.92E-05 | 0.70  | 3.39   | -     | 282.2    |
| PM-1, 6515                                                                                        | K.TFPGFSPM*LGFEVSETESR.G                        | 2282.51372 | 2 | 6.46E-04 | 0.55  | 2.73   | -     | 183.0    |
| PM-9, 1997                                                                                        | K.VQHILLQK.N                                    | 1107.33106 | 1 | 2.04E-04 | 0.30  | 2.36   | -     | 431.0    |
| PM-3, 1944                                                                                        | K.VQHILLQK.N                                    | 1107.33106 | 1 | 5.29E-04 | 0.69  | 2.49   | -     | 875.4    |
| PM-8, 2022                                                                                        | K.VQHILLQK.N                                    | 1107.33106 | 1 | 1.84E-05 | 0.64  | 2.92   | -     | 575.6    |
| gj4503745 ref NP_001447.1 filamin 1 (actin-binding protein-280); filamin 1; filamin A, alpha (act |                                                 |            |   | 2.42E-12 | 44.71 | 540.29 | 31.80 | 280757.4 |
| PM-1, 6231 - 6291                                                                                 | R.ALGALVDSCAPGLCPDWSDWASKPVTNAR.E               | 3231.56477 | 3 | 6.65E-05 | 0.83  | 4.28   | -     | 405.9    |
| PM-1, 6097 - 6175                                                                                 | R.ALGALVDSCAPGLCPDWSDWASKPVTNAR.E               | 3231.56477 | 3 | 8.21E-04 | 0.75  | 3.59   | -     | 392.4    |
| PM-9, 5900 - 5905                                                                                 | R.ALGALVDSCAPGLCPDWSDWASKPVTNAR.E               | 3231.56477 | 3 | 3.48E-06 | 0.72  | 3.17   | -     | 534.3    |
| PM-2, 5913 - 5973                                                                                 | R.ALGALVDSCAPGLCPDWSDWASKPVTNAR.E               | 3231.56477 | 3 | 5.51E-05 | 0.93  | 5.01   | -     | 792.9    |
| PM-5, 5940                                                                                        | R.ALGALVDSCAPGLCPDWSDWASKPVTNAR.E               | 3231.56477 | 3 | 5.85E-08 | 0.90  | 4.56   | -     | 712.3    |
| PM-2, 5998 - 6061                                                                                 | R.ALGALVDSCAPGLCPDWSDWASKPVTNAR.E               | 3231.56477 | 3 | 1.44E-10 | 0.94  | 5.68   | -     | 703.1    |
| PM-2, 2970                                                                                        | R.ANLPGSFQVDTSK.A                               | 1435.56409 | 1 | 1.92E-05 | 0.76  | 3.37   | -     | 424.4    |
| PM-1, 3325 - 3383                                                                                 | R.ANLPGSFQVDTSK.A                               | 1435.56409 | 1 | 6.74E-09 | 0.57  | 2.87   | -     | 376.3    |
| PM-4, 3142                                                                                        | R.AWGPGLGEGVVGK.S                               | 1227.39403 | 1 | 8.62E-05 | 0.39  | 2.21   | -     | 533.4    |
| PM-3, 3208                                                                                        | R.AWGPGLGEGVVGK.S                               | 1227.39403 | 2 | 2.86E-05 | 0.80  | 3.08   | -     | 611.0    |
| PM-1, 3663                                                                                        | R.AWGPGLGEGVVGK.S                               | 1227.39403 | 2 | 5.91E-05 | 0.89  | 4.03   | -     | 708.3    |
| PM-2, 3254                                                                                        | R.AWGPGLGEGVVGK.S                               | 1227.39403 | 2 | 4.09E-07 | 0.92  | 3.31   | -     | 1042.7   |
| PM-2, 5081                                                                                        | R.CSYQPTMEGVHTVHTFAGVPIPR.S                     | 2685.07753 | 2 | 1.22E-06 | 0.56  | 2.59   | -     | 354.9    |
| PM-8, 3764                                                                                        | R.DAEMPATEKDLAEDAPWKK.I                         | 2146.36338 | 2 | 2.51E-05 | 0.85  | 3.08   | -     | 1173.6   |
| PM-3, 4035 - 4100                                                                                 | K.DAGEGLLAVQITDPEGKPK.K                         | 1939.15612 | 2 | 3.03E-05 | 0.91  | 4.07   | -     | 1143.0   |
| PM-2, 4263 - 4302                                                                                 | K.DAGEGLLAVQITDPEGKPK.K                         | 1939.15612 | 2 | 2.67E-05 | 0.82  | 3.45   | -     | 913.8    |
| PM-1, 4457                                                                                        | K.DAGEGLLAVQITDPEGKPK.K                         | 1939.15612 | 3 | 2.04E-07 | 0.88  | 3.70   | -     | 1142.6   |
| PM-8, 4059 - 4062                                                                                 | K.DAGEGLLAVQITDPEGKPK.K                         | 1939.15612 | 2 | 4.82E-06 | 0.90  | 3.99   | -     | 1064.7   |
| PM-6, 3838                                                                                        | K.DAGEGLLAVQITDPEGKPK.K                         | 1939.15612 | 2 | 1.28E-04 | 0.76  | 3.34   | -     | 668.8    |
| PM-2, 3947 - 4013                                                                                 | K.DAGEGLLAVQITDPEGKPK.K                         | 1939.15612 | 2 | 1.10E-04 | 0.88  | 4.09   | -     | 894.1    |
| PM-9, 4036                                                                                        | K.DAGEGLLAVQITDPEGKPK.K                         | 1939.15612 | 2 | 7.16E-07 | 0.89  | 4.03   | -     | 792.2    |
| PM-10, 4175                                                                                       | K.DAGEGLLAVQITDPEGKPK.K                         | 1939.15612 | 2 | 6.24E-04 | 0.70  | 3.50   | -     | 687.0    |
| PM-1, 4712                                                                                        | K.DGSCGVAVYVQEPDGYEVSVK.F                       | 2259.43510 | 2 | 6.02E-05 | 0.86  | 4.29   | -     | 494.5    |
| PM-11, 2232 - 2233                                                                                | K.DKGEYTLVVK.V                                  | 1152.32223 | 2 | 2.30E-05 | 0.76  | 2.78   | -     | 749.9    |
| PM-2, 2741                                                                                        | R.DVDIHDHNTYTVK.Y                               | 1785.89230 | 2 | 9.04E-06 | 0.91  | 3.49   | -     | 908.6    |
| PM-2, 2829                                                                                        | R.DVDIHDHNTYTVK.Y                               | 1785.89230 | 2 | 1.58E-07 | 0.92  | 3.75   | -     | 918.6    |
| PM-3, 2745                                                                                        | R.DVDIHDHNTYTVK.Y                               | 1785.89230 | 2 | 2.32E-06 | 0.89  | 3.61   | -     | 786.8    |
| PM-3, 2625 - 2683                                                                                 | R.DVDIHDHNTYTVK.Y                               | 1785.89230 | 2 | 2.92E-06 | 0.94  | 4.20   | -     | 1020.8   |
| PM-4, 2962                                                                                        | R.EAGAGLAIAVEGPKS.A                             | 1427.58510 | 1 | 7.93E-05 | 0.88  | 3.95   | -     | 496.3    |
| PM-1, 2636                                                                                        | R.EATTEFSVDAR.A                                 | 1226.27493 | 2 | 9.85E-05 | 0.65  | 2.63   | -     | 547.1    |
| PM-3, 6188 - 6259                                                                                 | R.EEGPYEVEVTDGVPVPGSPFPLEAVAPTKPSK.V            | 3487.85286 | 3 | 1.71E-06 | 0.93  | 5.17   | -     | 754.6    |
| PM-1, 6431 - 6497                                                                                 | R.EEGPYEVEVTDGVPVPGSPFPLEAVAPTKPSK.V            | 3487.85286 | 3 | 6.22E-05 | 0.73  | 3.26   | -     | 705.2    |
| PM-2, 6226 - 6279                                                                                 | R.EEGPYEVEVTDGVPVPGSPFPLEAVAPTKPSK.V            | 3487.85286 | 3 | 1.75E-05 | 0.81  | 3.72   | -     | 612.0    |
| PM-2, 6337 - 6399                                                                                 | R.EEGPYEVEVTDGVPVPGSPFPLEAVAPTKPSK.V            | 3487.85286 | 3 | 8.85E-07 | 0.67  | 3.68   | -     | 425.8    |
| PM-3, 6320                                                                                        | R.EEGPYEVEVTDGVPVPGSPFPLEAVAPTKPSK.V            | 3487.85286 | 3 | 2.21E-05 | 0.85  | 3.87   | -     | 616.3    |
| PM-5, 6166 - 6168                                                                                 | R.EEGPYEVEVTDGVPVPGSPFPLEAVAPTKPSK.V            | 3487.85286 | 3 | 1.66E-09 | 0.94  | 5.22   | -     | 1002.9   |
| PM-1, 5180 - 5235                                                                                 | R.EGPPSISVLYGDEEVP.R.S                          | 1911.05809 | 2 | 1.17E-05 | 0.82  | 3.47   | -     | 855.7    |
| PM-10, 5536                                                                                       | R.FGGEHVPNSPFQVTLAGDQPSVQPPLR.S                 | 2947.25342 | 3 | 5.28E-04 | 0.77  | 3.38   | -     | 600.6    |
| PM-5, 5416                                                                                        | R.FGGEHVPNSPFQVTLAGDQPSVQPPLR.S                 | 2947.25342 | 2 | 1.49E-05 | 0.97  | 5.66   | -     | 1214.1   |
| PM-8, 5376                                                                                        | R.FGGEHVPNSPFQVTLAGDQPSVQPPLR.S                 | 2947.25342 | 2 | 2.57E-06 | 0.93  | 4.25   | -     | 933.4    |
| PM-2, 5383 - 5450                                                                                 | R.FGGEHVPNSPFQVTLAGDQPSVQPPLR.S                 | 2947.25342 | 3 | 1.01E-10 | 0.95  | 5.52   | -     | 1053.3   |
| PM-5, 5381 - 5440                                                                                 | R.FGGEHVPNSPFQVTLAGDQPSVQPPLR.S                 | 2947.25342 | 3 | 3.27E-07 | 0.94  | 5.56   | -     | 732.2    |
| PM-4, 5274                                                                                        | R.FGGEHVPNSPFQVTLAGDQPSVQPPLR.S                 | 2947.25342 | 2 | 2.13E-07 | 0.96  | 5.59   | -     | 933.1    |
| PM-1, 5740 - 5797                                                                                 | R.FGGEHVPNSPFQVTLAGDQPSVQPPLR.S                 | 2947.25342 | 2 | 2.14E-06 | 0.96  | 5.62   | -     | 942.9    |
| PM-2, 5406 - 5465                                                                                 | R.FGGEHVPNSPFQVTLAGDQPSVQPPLR.S                 | 2947.25342 | 2 | 3.20E-09 | 0.97  | 5.56   | -     | 1125.4   |
| PM-3, 5356 - 5417                                                                                 | R.FGGEHVPNSPFQVTLAGDQPSVQPPLR.S                 | 2947.25342 | 2 | 6.48E-07 | 0.94  | 4.43   | -     | 1020.5   |
| PM-1, 3849                                                                                        | K.FNGTHIPGSPFK.I                                | 1302.46259 | 2 | 1.29E-05 | 0.76  | 2.74   | -     | 702.5    |
| PM-1, 3025                                                                                        | R.FVPAEMGTHTVSVK.Y                              | 1503.74821 | 2 | 1.00E-04 | 0.89  | 3.57   | -     | 553.3    |
| PM-1, 3465 - 3472                                                                                 | K.GKLDVQFSGLTK.G                                | 1293.49392 | 2 | 1.29E-05 | 0.87  | 4.23   | -     | 639.9    |
| PM-1, 5096 - 5163                                                                                 | K.GLVEPVDVVDNADGTQTVNVYVPSR.E                   | 2545.74387 | 2 | 3.40E-04 | 0.94  | 4.78   | -     | 1023.3   |
| PM-2, 4881 - 4941                                                                                 | K.GLVEPVDVVDNADGTQTVNVYVPSR.E                   | 2545.74387 | 2 | 3.31E-06 | 0.92  | 4.56   | -     | 599.4    |
| PM-3, 4789                                                                                        | K.HTAM*VSWGGSVSPNSPFR.V                         | 1960.20541 | 2 | 6.95E-06 | 0.95  | 4.45   | -     | 1138.3   |
| PM-1, 5313                                                                                        | K.HTAM*VSWGGSVSPNSPFR.V                         | 1960.20541 | 3 | 3.62E-04 | 0.83  | 3.83   | -     | 950.6    |
| PM-5, 4973                                                                                        | K.HTAM*VSWGGSVSPNSPFR.V                         | 1960.20541 | 2 | 1.03E-08 | 0.96  | 4.61   | -     | 1307.0   |
| PM-1, 5673 - 5677                                                                                 | K.HTAM*VSWGGSVSPNSPFR.V                         | 1944.20601 | 2 | 5.02E-06 | 0.97  | 5.46   | -     | 1164.0   |
| PM-3, 5225 - 5233                                                                                 | K.HTAM*VSWGGSVSPNSPFR.V                         | 1944.20601 | 2 | 1.61E-04 | 0.96  | 4.37   | -     | 1430.3   |
| PM-2, 4913                                                                                        | K.HTAM*VSWGGSVSPNSPFR.V                         | 1960.20541 | 2 | 3.58E-04 | 0.92  | 4.50   | -     | 810.6    |
| PM-2, 5165 - 5227                                                                                 | K.HTAM*VSWGGSVSPNSPFR.V                         | 1944.20601 | 2 | 3.28E-05 | 0.96  | 5.31   | -     | 996.8    |
| PM-4, 4765                                                                                        | K.HTAM*VSWGGSVSPNSPFR.V                         | 1960.20541 | 2 | 5.80E-04 | 0.94  | 4.55   | -     | 995.4    |
| PM-3, 3913                                                                                        | R.IANLQTDLSDGLR.L                               | 1416.56231 | 1 | 2.18E-05 | 0.58  | 2.79   | -     | 311.2    |
| PM-4, 1985                                                                                        | K.IVGPSSGAAPVCK.V                               | 1156.38050 | 1 | 3.35E-04 | 0.54  | 2.24   | -     | 577.0    |
| PM-2, 2057                                                                                        | K.IVGPSSGAAPVCK.V                               | 1156.38050 | 2 | 5.53E-05 | 0.91  | 3.77   | -     | 831.1    |
| PM-1, 2427                                                                                        | K.IVGPSSGAAPVCK.V                               | 1156.38050 | 2 | 1.69E-06 | 0.91  | 3.21   | -     | 1082.0   |

|                    |                                           |            |   |          |      |      |   |        |
|--------------------|-------------------------------------------|------------|---|----------|------|------|---|--------|
| PM-2, 3726         | K.IVGPSSAAVPCKEPGLGADNSVVR.F              | 2450.79998 | 2 | 8.92E-04 | 0.70 | 3.15 | - | 286.8  |
| PM-3, 3703         | K.IVGPSSAAVPCKEPGLGADNSVVR.F              | 2450.79998 | 3 | 3.35E-04 | 0.82 | 3.68 | - | 793.9  |
| PM-1, 4108 - 4109  | K.IVGPSSAAVPCKEPGLGADNSVVR.F              | 2450.79998 | 3 | 8.60E-05 | 0.95 | 5.80 | - | 1019.3 |
| PM-2, 3722 - 3737  | K.IVGPSSAAVPCKEPGLGADNSVVR.F              | 2450.79998 | 3 | 1.69E-06 | 0.95 | 4.75 | - | 1422.3 |
| PM-1, 4267         | R.KDGSQGVYVQEPGGYEVSVK.F                  | 2387.60802 | 2 | 3.28E-04 | 0.78 | 3.62 | - | 350.3  |
| PM-1, 3475 - 3476  | K.KTHIQDNDHDTYTVAYVPDVTGR.Y               | 2588.77367 | 2 | 4.65E-04 | 0.84 | 3.78 | - | 735.5  |
| PM-1, 4936 - 4992  | K.LPQLPITNFSR.D                           | 1286.50461 | 2 | 7.04E-05 | 0.92 | 3.60 | - | 792.0  |
| PM-3, 5135 - 5196  | K.LQVEPAVDTSGVQCYGPGIEGGGVFR.E            | 2765.05117 | 2 | 7.14E-07 | 0.95 | 5.03 | - | 894.8  |
| PM-5, 5156         | K.LQVEPAVDTSGVQCYGPGIEGGGVFR.E            | 2765.05117 | 2 | 4.54E-07 | 0.69 | 3.15 | - | 375.5  |
| PM-4, 5070 - 5108  | K.LQVEPAVDTSGVQCYGPGIEGGGVFR.E            | 2765.05117 | 2 | 4.22E-07 | 0.95 | 5.01 | - | 959.2  |
| PM-11, 5251 - 5252 | K.LQVEPAVDTSGVQCYGPGIEGGGVFR.E            | 2765.05117 | 2 | 5.85E-07 | 0.88 | 3.97 | - | 792.8  |
| PM-6, 4954         | K.LQVEPAVDTSGVQCYGPGIEGGGVFR.E            | 2765.05117 | 2 | 6.20E-09 | 0.88 | 3.97 | - | 575.6  |
| PM-8, 5132 - 5143  | K.LQVEPAVDTSGVQCYGPGIEGGGVFR.E            | 2765.05117 | 2 | 2.49E-07 | 0.94 | 4.97 | - | 802.8  |
| PM-9, 5144         | K.LQVEPAVDTSGVQCYGPGIEGGGVFR.E            | 2765.05117 | 2 | 3.86E-07 | 0.86 | 3.95 | - | 436.7  |
| PM-1, 5495 - 5544  | K.LQVEPAVDTSGVQCYGPGIEGGGVFR.E            | 2765.05117 | 2 | 3.71E-07 | 0.95 | 5.33 | - | 783.4  |
| PM-4, 3642 - 3710  | R.LVSNHSLHETSSVFDLSLTK.A                  | 2201.42190 | 2 | 2.36E-04 | 0.95 | 4.55 | - | 1265.8 |
| PM-1, 4560         | R.LVSNHSLHETSSVFDLSLTK.A                  | 2201.42190 | 2 | 9.01E-10 | 0.95 | 4.46 | - | 1366.8 |
| PM-4, 4028 - 4058  | R.LVSNHSLHETSSVFDLSLTK.A                  | 2201.42190 | 2 | 4.19E-07 | 0.89 | 4.24 | - | 793.5  |
| PM-2, 4214         | R.LVSNHSLHETSSVFDLSLTK.A                  | 2201.42190 | 2 | 7.96E-04 | 0.68 | 2.96 | - | 334.1  |
| PM-1, 4244 - 4251  | R.LVSNHSLHETSSVFDLSLTK.A                  | 2201.42190 | 2 | 3.21E-05 | 0.92 | 4.62 | - | 792.8  |
| PM-1, 4249 - 4260  | R.LVSNHSLHETSSVFDLSLTK.A                  | 2201.42190 | 3 | 1.09E-04 | 0.90 | 3.06 | - | 1636.3 |
| PM-2, 2914         | R.NGHVGSFVFK.E                            | 1155.33104 | 1 | 4.65E-07 | 0.85 | 3.22 | - | 619.1  |
| PM-3, 2831         | R.NGHVGSFVFK.E                            | 1155.33104 | 1 | 5.30E-04 | 0.35 | 2.39 | - | 258.0  |
| PM-1, 3303         | R.NGHVGSFVFK.E                            | 1155.33104 | 1 | 4.16E-05 | 0.69 | 2.53 | - | 461.9  |
| PM-4, 4580 - 4589  | K.NGQHVASSPIPVISQSEIGDASR.V               | 2449.66256 | 3 | 3.83E-06 | 0.96 | 4.96 | - | 1960.9 |
| PM-1, 4996         | K.NGQHVASSPIPVISQSEIGDASR.V               | 2449.66256 | 2 | 2.82E-06 | 0.74 | 2.57 | - | 722.5  |
| PM-2, 6646 - 6706  | K.SADFVVEAIGDDVGTGLGFSVEGSPQAK.I          | 2696.90399 | 2 | 6.15E-08 | 0.94 | 4.44 | - | 1332.5 |
| PM-10, 3631        | R.SAGQGEVLVYVEDPAGHQEAK.V                 | 2314.45074 | 2 | 3.35E-05 | 0.77 | 3.69 | - | 495.3  |
| PM-11, 3740        | R.SAGQGEVLVYVEDPAGHQEAK.V                 | 2314.45074 | 2 | 1.79E-05 | 0.84 | 3.42 | - | 563.6  |
| PM-2, 3569 - 3638  | R.SAGQGEVLVYVEDPAGHQEAK.V                 | 2314.45074 | 2 | 1.09E-06 | 0.82 | 3.91 | - | 483.4  |
| PM-6, 3395 - 3398  | R.SAGQGEVLVYVEDPAGHQEAK.V                 | 2314.45074 | 2 | 7.98E-05 | 0.90 | 3.93 | - | 743.9  |
| PM-4, 3540 - 3609  | R.SAGQGEVLVYVEDPAGHQEAK.V                 | 2314.45074 | 2 | 1.81E-07 | 0.71 | 3.15 | - | 472.5  |
| PM-2, 4215 - 4285  | R.SAGQGEVLVYVEDPAGHQEAK.V                 | 2314.45074 | 2 | 4.69E-04 | 0.44 | 2.59 | - | 349.3  |
| PM-4, 3426         | R.SAGQGEVLVYVEDPAGHQEAK.V                 | 2314.45074 | 2 | 4.42E-06 | 0.75 | 3.59 | - | 446.1  |
| PM-4, 3418         | R.SAGQGEVLVYVEDPAGHQEAK.V                 | 2314.45074 | 2 | 8.49E-05 | 0.85 | 3.88 | - | 559.7  |
| PM-7, 3427         | R.SAGQGEVLVYVEDPAGHQEAK.V                 | 2314.45074 | 2 | 1.07E-04 | 0.86 | 3.58 | - | 683.0  |
| PM-3, 3517 - 3540  | R.SAGQGEVLVYVEDPAGHQEAK.V                 | 2314.45074 | 2 | 1.71E-05 | 0.86 | 3.93 | - | 635.0  |
| PM-3, 3601         | R.SAGQGEVLVYVEDPAGHQEAK.V                 | 2314.45074 | 2 | 5.15E-06 | 0.82 | 3.41 | - | 558.6  |
| PM-3, 3687 - 3720  | R.SAGQGEVLVYVEDPAGHQEAK.V                 | 2314.45074 | 2 | 3.27E-04 | 0.89 | 3.97 | - | 656.9  |
| PM-1, 3951 - 4007  | R.SAGQGEVLVYVEDPAGHQEAK.V                 | 2314.45074 | 2 | 1.97E-07 | 0.93 | 4.90 | - | 748.3  |
| PM-3, 3860         | R.SAGQGEVLVYVEDPAGHQEAK.V                 | 2314.45074 | 2 | 3.61E-04 | 0.30 | 2.52 | - | 203.2  |
| PM-1, 4064         | R.SAGQGEVLVYVEDPAGHQEAK.V                 | 2314.45074 | 2 | 8.65E-07 | 0.76 | 3.41 | - | 458.0  |
| PM-2, 3010         | K.SPFVYVDK.S                              | 1084.20321 | 1 | 2.64E-04 | 0.89 | 3.25 | - | 931.5  |
| PM-1, 3349         | K.SPFVYVDK.S                              | 1084.20321 | 1 | 2.53E-06 | 0.85 | 3.14 | - | 979.5  |
| PM-5, 3060         | K.SPFVYVDK.S                              | 1084.20321 | 1 | 1.93E-05 | 0.54 | 2.42 | - | 655.0  |
| PM-1, 3348         | K.SPFVYVDK.S                              | 1084.20321 | 2 | 5.14E-05 | 0.92 | 3.36 | - | 983.7  |
| PM-3, 2941         | K.SPFVYVDK.S                              | 1084.20321 | 1 | 8.55E-05 | 0.87 | 3.08 | - | 1041.8 |
| PM-1, 3001 - 3075  | R.SPYTVTGQACNPSACR.A                      | 1869.07248 | 2 | 4.96E-04 | 0.40 | 2.59 | - | 239.4  |
| PM-2, 2441         | R.TGVELGKPTHTFVNAK.A                      | 1699.93205 | 3 | 3.81E-04 | 0.66 | 3.12 | - | 641.7  |
| PM-5, 3008         | R.VANPSGNTLETYYQDR.G                      | 1764.87462 | 2 | 2.47E-06 | 0.86 | 3.39 | - | 713.4  |
| PM-2, 2971 - 3033  | R.VANPSGNTLETYYQDR.G                      | 1764.87462 | 2 | 2.42E-12 | 0.95 | 5.24 | - | 831.7  |
| PM-1, 3457         | R.VANPSGNTLETYYQDR.G                      | 1764.87462 | 2 | 1.31E-07 | 0.92 | 3.99 | - | 778.5  |
| PM-1, 3291 - 3351  | R.VANPSGNTLETYYQDR.G                      | 1764.87462 | 2 | 1.88E-10 | 0.96 | 4.73 | - | 1093.7 |
| PM-10, 3051 - 3055 | R.VANPSGNTLETYYQDR.G                      | 1764.87462 | 2 | 1.84E-11 | 0.84 | 3.73 | - | 519.4  |
| PM-9, 2991 - 2992  | R.VANPSGNTLETYYQDR.G                      | 1764.87462 | 2 | 9.91E-06 | 0.61 | 2.82 | - | 484.4  |
| PM-3, 2920 - 2960  | R.VANPSGNTLETYYQDR.G                      | 1764.87462 | 2 | 2.41E-04 | 0.83 | 3.32 | - | 592.7  |
| PM-4, 3040         | K.VDINTEDLEDGTCR.V                        | 1637.70803 | 2 | 2.58E-05 | 0.94 | 3.73 | - | 1424.5 |
| PM-2, 3129         | K.VDINTEDLEDGTCR.V                        | 1637.70803 | 2 | 6.67E-07 | 0.81 | 3.09 | - | 807.8  |
| PM-5, 3120         | K.VDINTEDLEDGTCR.V                        | 1637.70803 | 2 | 6.04E-05 | 0.92 | 3.87 | - | 1092.9 |
| PM-1, 3419         | K.VDINTEDLEDGTCR.V                        | 1637.70803 | 2 | 1.46E-04 | 0.90 | 3.39 | - | 1152.2 |
| PM-2, 2209         | K.VDVGKQDEFTVK.S                          | 1365.51377 | 1 | 6.20E-04 | 0.45 | 3.02 | - | 279.4  |
| PM-3, 2179         | K.VDVGKQDEFTVK.S                          | 1365.51377 | 1 | 7.58E-04 | 0.51 | 3.22 | - | 409.3  |
| PM-1, 2591         | K.VDVGKQDEFTVK.S                          | 1365.51377 | 2 | 2.76E-07 | 0.93 | 4.09 | - | 787.5  |
| PM-2, 2401         | K.VEPGLGADNSVVR.F                         | 1313.44209 | 2 | 8.81E-08 | 0.72 | 2.87 | - | 235.0  |
| PM-3, 2348         | K.VEPGLGADNSVVR.F                         | 1313.44209 | 2 | 1.89E-07 | 0.76 | 2.63 | - | 290.7  |
| PM-2, 6153 - 6209  | K.VEYTPYEEGLHSVDVTDYDGSPPVSPFPVPTGCDPSR.V | 4299.59014 | 3 | 6.60E-05 | 0.93 | 5.73 | - | 504.4  |
| PM-9, 6073         | K.VEYTPYEEGLHSVDVTDYDGSPPVSPFPVPTGCDPSR.V | 4299.59014 | 3 | 1.48E-04 | 0.87 | 4.78 | - | 526.5  |
| PM-2, 6542         | K.VGSAADIPINISSETDLSLLTATVPPSGR.E         | 2895.25495 | 2 | 9.74E-07 | 0.86 | 4.04 | - | 533.3  |
| PM-3, 6460         | K.VGSAADIPINISSETDLSLLTATVPPSGR.E         | 2895.25495 | 2 | 1.02E-07 | 0.91 | 4.65 | - | 534.8  |
| PM-7, 6370         | K.VGSAADIPINISSETDLSLLTATVPPSGR.E         | 2895.25495 | 2 | 5.18E-05 | 0.83 | 3.54 | - | 640.9  |
| PM-4, 6424         | K.VGSAADIPINISSETDLSLLTATVPPSGR.E         | 2895.25495 | 2 | 1.52E-07 | 0.94 | 5.17 | - | 807.8  |
| PM-2, 6533         | K.VGSAADIPINISSETDLSLLTATVPPSGR.E         | 2895.25495 | 3 | 2.57E-07 | 0.62 | 3.38 | - | 183.6  |
| PM-5, 3949         | K.VHSPSGALEECYVEIDQDK.Y                   | 2278.43842 | 2 | 7.72E-06 | 0.64 | 2.55 | - | 515.7  |
| PM-1, 4308 - 4384  | K.VHSPSGALEECYVEIDQDK.Y                   | 2278.43842 | 2 | 2.41E-05 | 0.96 | 4.89 | - | 1603.4 |
| PM-4, 3748 - 3805  | K.VHSPSGALEECYVEIDQDK.Y                   | 2278.43842 | 2 | 1.89E-04 | 0.54 | 3.05 | - | 450.1  |
| PM-5, 4346         | K.VHSPSGALEECYVEIDQDKYAVR.F               | 2768.00869 | 2 | 2.47E-06 | 0.71 | 3.29 | - | 706.7  |
| PM-2, 4290 - 4299  | K.VHSPSGALEECYVEIDQDKYAVR.F               | 2768.00869 | 2 | 5.51E-08 | 0.92 | 4.35 | - | 963.7  |
| PM-3, 4265         | K.VHSPSGALEECYVEIDQDKYAVR.F               | 2768.00869 | 2 | 9.33E-10 | 0.91 | 4.35 | - | 892.5  |
| PM-4, 4148         | K.VHSPSGALEECYVEIDQDKYAVR.F               | 2768.00869 | 2 | 6.60E-09 | 0.92 | 4.25 | - | 1075.9 |
| PM-1, 3737         | K.VNQASFAVSLNGAK.G                        | 1503.68480 | 2 | 8.12E-07 | 0.82 | 3.14 | - | 631.1  |
| PM-3, 3368         | K.VNQASFAVSLNGAK.G                        | 1503.68480 | 2 | 3.13E-04 | 0.76 | 2.80 | - | 524.5  |
| PM-2, 3429 - 3430  | K.VNQASFAVSLNGAK.G                        | 1503.68480 | 2 | 9.33E-07 | 0.88 | 3.78 | - | 622.1  |
| PM-6, 3258 - 3327  | K.VNQASFAVSLNGAK.G                        | 1503.68480 | 2 | 2.98E-05 | 0.81 | 3.11 | - | 530.8  |
| PM-1, 3832         | K.VNQASFAVSLNGAK.G                        | 1503.68480 | 2 | 8.31E-08 | 0.70 | 2.98 | - | 391.9  |
| PM-1, 3943 - 3988  | K.VNQASFAVSLNGAK.G                        | 1503.68480 | 2 | 1.62E-05 | 0.64 | 2.81 | - | 330.1  |
| PM-5, 3549 - 3550  | R.VQVQDNEGCPVEALVK.D                      | 1786.00013 | 2 | 1.25E-04 | 0.94 | 4.03 | - | 1268.8 |
| PM-1, 3931 - 4005  | R.VQVQDNEGCPVEALVK.D                      | 1786.00013 | 2 | 7.95E-10 | 0.97 | 5.38 | - | 1737.6 |
| PM-2, 3514 - 3554  | R.VQVQDNEGCPVEALVK.D                      | 1786.00013 | 2 | 8.52E-05 | 0.94 | 4.10 | - | 1240.7 |
| PM-4, 3396 - 3456  | R.VQVQDNEGCPVEALVK.D                      | 1786.00013 | 2 | 4.91E-04 | 0.83 | 3.26 | - | 1049.8 |
| PM-6, 3366         | R.VQVQDNEGCPVEALVK.D                      | 1786.00013 | 2 | 3.15E-06 | 0.93 | 3.22 | - | 1444.6 |
| PM-3, 3475         | R.VQVQDNEGCPVEALVK.D                      | 1786.00013 | 2 | 4.48E-04 | 0.95 | 4.28 | - | 1218.2 |
| PM-4, 4320         | R.VSQQLHGHETFEPAEFIDTR.D                  | 2441.64058 | 2 | 7.97E-05 | 0.94 | 4.04 | - | 1261.7 |
| PM-1, 3207 - 3208  | K.VTVLFAQHIAK.S                           | 1284.53185 | 2 | 4.14E-04 | 0.91 | 4.09 | - | 784.4  |
| PM-2, 2778         | K.VTVLFAQHIAK.S                           | 1284.53185 | 2 | 6.82E-04 | 0.80 | 3.80 | - | 503.3  |
| PM-1, 5136         | R.VTYTPM*APGSYLISIK.Y                     | 1758.07165 | 2 | 3.88E-05 | 0.75 | 2.80 | - | 444.9  |
| PM-2, 2958         | K.YGGPYHIGGSPFK.A                         | 1380.53182 | 2 | 4.72E-09 | 0.97 | 4.08 | - | 1973.2 |
| PM-4, 2817         | K.YGGPYHIGGSPFK.A                         | 1380.53182 | 1 | 5.75E-06 | 0.91 | 4.12 | - | 594.7  |
| PM-2, 2729         | K.YGGQVPVNFPSK.L                          | 1291.43658 | 1 | 1.92E-04 | 0.27 | 2.35 | - | 270.4  |
| PM-1, 3029         | K.YGGQVPVNFPSK.L                          | 1291.43658 | 2 | 8.78E-05 | 0.93 | 3.76 | - | 596.2  |
| PM-1, 2859         | K.YNEQHVGSPFTAR.V                         | 1603.71978 | 2 | 1.87E-04 | 0.66 | 2.66 | - | 329.2  |
| PM-1, 4588 - 4647  | K.YTPVQQGPVGVNVTYGGDPIPK.S                | 2287.55640 | 2 | 2.18E-07 | 0.88 | 4.20 | - | 489.1  |
| PM-6, 4166         | K.YTPVQQGPVGVNVTYGGDPIPK.S                | 2287.55640 | 2 | 8.24E-06 | 0.58 | 2.98 | - | 471.1  |
| PM-1, 4703 - 4781  | K.YTPVQQGPVGVNVTYGGDPIPK.S                | 2287.55640 | 2 | 5.73E-05 | 0.88 | 3.88 | - | 590.0  |
| PM-3, 4383 - 4443  | K.YTPVQQGPVGVNVTYGGDPIPK.S                | 2287.55640 | 2 | 1.56E-07 | 0.75 | 2.89 | - | 647.6  |
| PM-5, 4332 - 4388  | K.YTPVQQGPVGVNVTYGGDPIPK.S                | 2287.55640 | 2 | 1.14E-07 | 0.73 | 2.80 | - | 678.3  |
| PM-2, 4337 - 4409  | K.YTPVQQGPVGVNVTYGGDPIPK.S                | 2287.55640 | 2 | 1.19E-05 | 0.76 | 3.35 | - | 420.8  |
| PM-2, 6370         | R.YWQEAAGEYAVHVLNCSIEDIR.L                | 2537.74838 | 2 | 1.45E-10 | 0.91 | 4.01 | - | 628.9  |

|                                                                                   |                                  |            |   |          |      |      |   |        |
|-----------------------------------------------------------------------------------|----------------------------------|------------|---|----------|------|------|---|--------|
| PM-1, 6469                                                                        | R.YWPQAGEYAVHVLCSNSEDIR.L        | 2537.74838 | 2 | 5.81E-07 | 0.78 | 2.91 | - | 699.8  |
| PM-3, 6009 - 6020                                                                 | R.YWPQAGEYAVHVLCSNSEDIR.L        | 2537.74838 | 2 | 7.59E-07 | 0.72 | 2.88 | - | 602.6  |
| PM-4, 5957                                                                        | R.YWPQAGEYAVHVLCSNSEDIR.L        | 2537.74838 | 2 | 2.51E-05 | 0.66 | 2.51 | - | 622.5  |
| PM-4, 6270 - 6285                                                                 | R.YWPQAGEYAVHVLCSNSEDIR.L        | 2537.74838 | 2 | 3.76E-06 | 0.87 | 3.33 | - | 815.6  |
| PM-3, 6303                                                                        | R.YWPQAGEYAVHVLCSNSEDIR.L        | 2537.74838 | 2 | 5.69E-06 | 0.89 | 3.94 | - | 669.1  |
| gj1266778[ref]NP_002464.1] myosin, heavy polypeptide 9, non-muscle [Homo sapiens] |                                  |            |   |          |      |      |   |        |
| PM-1, 3757                                                                        | K.ALELDSNLYR.K                   | 1194.31920 | 2 | 3.60E-04 | 0.93 | 3.46 | - | 1286.2 |
| PM-1, 6435 - 6453                                                                 | R.ALEQQVEEM*KTQLELEDELOQATEDAK.L | 3165.38394 | 3 | 5.66E-05 | 0.87 | 3.96 | - | 702.9  |
| PM-3, 6384 - 6451                                                                 | R.ALEQQVEEMKTQLELEDELOQATEDAK.L  | 3149.38454 | 3 | 2.72E-05 | 0.94 | 4.73 | - | 1428.9 |
| PM-2, 6531                                                                        | R.ALEQQVEEMKTQLELEDELOQATEDAK.L  | 3149.38454 | 3 | 1.53E-05 | 0.88 | 4.13 | - | 1047.6 |
| PM-3, 4903                                                                        | K.ANLQIDQINTDLNLR.S              | 1871.04187 | 2 | 2.94E-05 | 0.92 | 4.04 | - | 795.6  |
| PM-3, 6379                                                                        | K.DFSALESQLODQTQELLQEQENR.Q      | 2494.61059 | 2 | 9.43E-06 | 0.97 | 5.99 | - | 1361.7 |
| PM-4, 6340                                                                        | K.DFSALESQLODQTQELLQEQENR.Q      | 2494.61059 | 2 | 1.45E-05 | 0.97 | 5.75 | - | 1409.4 |
| PM-2, 6457                                                                        | K.DFSALESQLODQTQELLQEQENR.Q      | 2494.61059 | 2 | 4.16E-06 | 0.97 | 5.79 | - | 1293.8 |
| PM-3, 5556 - 5629                                                                 | R.ELESQISELQEDLESER.A            | 2035.10956 | 2 | 9.45E-04 | 0.42 | 2.67 | - | 381.1  |
| PM-1, 4455 - 4528                                                                 | K.EQADFAIEALAK.A                 | 1306.44632 | 2 | 4.19E-04 | 0.81 | 2.91 | - | 596.1  |
| PM-3, 2383                                                                        | K.HEAMITDLEER.L                  | 1344.47646 | 1 | 4.61E-04 | 0.17 | 2.16 | - | 390.6  |
| PM-1, 3295                                                                        | R.HEM*PPHIYAITDTAYR.S            | 1932.14884 | 2 | 2.00E-04 | 0.80 | 2.62 | - | 729.5  |
| PM-2, 2905 - 2913                                                                 | R.HEM*PPHIYAITDTAYR.S            | 1932.14884 | 2 | 1.08E-04 | 0.92 | 3.82 | - | 778.8  |
| PM-3, 5319                                                                        | R.IAQLEEELEEEQGNTELINDRLK.K      | 2714.92085 | 2 | 6.81E-07 | 0.88 | 3.77 | - | 909.4  |
| PM-5, 5666                                                                        | K.IRELESQISELQEDLESER.A          | 2304.45416 | 2 | 1.17E-04 | 0.91 | 3.79 | - | 963.8  |
| PM-4, 5544 - 5608                                                                 | K.IRELESQISELQEDLESER.A          | 2304.45416 | 2 | 2.33E-05 | 0.97 | 5.23 | - | 1230.6 |
| PM-3, 5567 - 5631                                                                 | K.IRELESQISELQEDLESER.A          | 2304.45416 | 2 | 8.36E-05 | 0.98 | 6.24 | - | 1047.8 |
| PM-3, 5651                                                                        | K.IRELESQISELQEDLESER.A          | 2304.45416 | 2 | 4.35E-06 | 0.90 | 3.69 | - | 732.7  |
| PM-3, 3896 - 3933                                                                 | R.KKLEMDLKDLEAHIDSANK.N          | 2199.51410 | 2 | 1.76E-05 | 0.94 | 4.27 | - | 1028.3 |
| PM-2, 2899 - 2927                                                                 | K.KLEEEQIILEDQNK.L               | 1890.10512 | 2 | 4.77E-04 | 0.69 | 3.02 | - | 824.9  |
| PM-8, 6243                                                                        | R.KLEGDSTLSDQIAELQAQIAELK.M      | 2616.86032 | 2 | 9.64E-05 | 0.93 | 4.22 | - | 1139.5 |
| PM-1, 6524                                                                        | R.KLEGDSTLSDQIAELQAQIAELK.M      | 2616.86032 | 2 | 1.11E-07 | 0.97 | 5.67 | - | 1385.2 |
| PM-3, 6403                                                                        | R.KLEGDSTLSDQIAELQAQIAELK.M      | 2616.86032 | 2 | 5.40E-09 | 0.96 | 5.50 | - | 1368.2 |
| PM-2, 6485                                                                        | R.KLEGDSTLSDQIAELQAQIAELK.M      | 2616.86032 | 2 | 7.67E-07 | 0.97 | 6.32 | - | 1337.0 |
| PM-4, 6368                                                                        | R.KLEGDSTLSDQIAELQAQIAELK.M      | 2616.86032 | 2 | 7.83E-07 | 0.94 | 4.84 | - | 1113.4 |
| PM-5, 2796                                                                        | K.KMEDSVGCLTAEEVYR.K             | 1982.22605 | 2 | 9.10E-08 | 0.91 | 4.10 | - | 1085.7 |
| PM-3, 4983 - 5039                                                                 | K.KMQQNIQEELQEEEEESAR.Q          | 2462.63354 | 2 | 2.49E-04 | 0.85 | 3.70 | - | 718.6  |
| PM-1, 5461                                                                        | K.KMQQNIQEELQEEEEESAR.Q          | 2462.63354 | 2 | 4.48E-05 | 0.83 | 3.63 | - | 665.1  |
| PM-5, 3416 - 3448                                                                 | K.KQLEEEIICHLEAR.V               | 1770.94556 | 2 | 3.87E-04 | 0.96 | 4.57 | - | 1635.8 |
| PM-2, 3270                                                                        | K.LEEEQIILEDQNK.L                | 1761.93220 | 2 | 6.90E-05 | 0.87 | 3.30 | - | 885.3  |
| PM-3, 6439                                                                        | K.LEGDSTLSDQIAELQAQIAELK.M       | 2488.68740 | 2 | 6.89E-07 | 0.97 | 5.65 | - | 1212.8 |
| PM-2, 6517 - 6518                                                                 | K.LEGDSTLSDQIAELQAQIAELK.M       | 2488.68740 | 2 | 7.39E-07 | 0.92 | 4.67 | - | 788.8  |
| PM-3, 5795                                                                        | R.LQQELDLLVLDLHOR.Q              | 1951.12699 | 2 | 1.25E-10 | 0.97 | 5.00 | - | 2022.3 |
| PM-8, 5863                                                                        | R.LQQELDLLVLDLHOR.Q              | 1951.12699 | 2 | 2.33E-08 | 0.94 | 4.56 | - | 1151.0 |
| PM-1, 6285 - 6323                                                                 | R.LQQELDLLVLDLHOR.Q              | 1951.12699 | 2 | 3.63E-07 | 0.95 | 4.65 | - | 1309.3 |
| PM-3, 5775 - 5856                                                                 | R.LQQELDLLVLDLHOR.Q              | 1951.12699 | 2 | 7.78E-09 | 0.98 | 6.04 | - | 2376.0 |
| PM-5, 5889 - 5944                                                                 | R.LQQELDLLVLDLHOR.Q              | 1951.12699 | 2 | 4.78E-09 | 0.96 | 5.34 | - | 1141.5 |
| PM-1, 6284                                                                        | R.LQQELDLLVLDLHOR.Q              | 1951.12699 | 3 | 1.95E-05 | 0.79 | 3.58 | - | 662.7  |
| PM-4, 5726 - 5793                                                                 | R.LQQELDLLVLDLHOR.Q              | 1951.12699 | 2 | 2.56E-06 | 0.96 | 4.76 | - | 1648.2 |
| PM-2, 5937 - 5977                                                                 | R.LQQELDLLVLDLHOR.Q              | 1951.12699 | 2 | 3.46E-12 | 0.97 | 5.45 | - | 1560.4 |
| PM-2, 5789 - 5853                                                                 | K.LQVELDNVTGLLSQSDSK.S           | 1947.13342 | 2 | 2.29E-06 | 0.95 | 5.06 | - | 1046.4 |
| PM-3, 5903 - 5961                                                                 | K.LQVELDNVTGLLSQSDSK.S           | 1947.13342 | 2 | 1.80E-06 | 0.97 | 5.29 | - | 1912.6 |
| PM-2, 5658 - 5730                                                                 | K.LQVELDNVTGLLSQSDSK.S           | 1947.13342 | 2 | 4.69E-07 | 0.97 | 5.45 | - | 1670.6 |
| PM-2, 6074                                                                        | K.LQVELDNVTGLLSQSDSK.S           | 1947.13342 | 2 | 6.58E-04 | 0.94 | 4.64 | - | 871.4  |
| PM-3, 6024 - 6073                                                                 | K.LQVELDNVTGLLSQSDSK.S           | 1947.13342 | 2 | 4.16E-06 | 0.94 | 4.94 | - | 757.4  |
| PM-4, 5977 - 6052                                                                 | K.LQVELDNVTGLLSQSDSK.S           | 1947.13342 | 2 | 1.62E-05 | 0.86 | 3.89 | - | 760.2  |
| PM-3, 6133 - 6187                                                                 | K.LQVELDNVTGLLSQSDSK.S           | 1947.13342 | 2 | 5.26E-04 | 0.68 | 3.42 | - | 622.3  |
| PM-1, 6256                                                                        | K.LQVELDNVTGLLSQSDSK.S           | 1947.13342 | 2 | 8.59E-06 | 0.93 | 4.65 | - | 696.4  |
| PM-1, 5545                                                                        | K.LQVELDNVTGLLSQSDSK.S           | 1947.13342 | 2 | 3.25E-05 | 0.80 | 3.03 | - | 755.7  |
| PM-1, 5912 - 5967                                                                 | K.LQVELDNVTGLLSQSDSK.S           | 1947.13342 | 2 | 6.02E-07 | 0.97 | 5.61 | - | 1453.9 |
| PM-6, 5370                                                                        | K.LQVELDNVTGLLSQSDSK.S           | 1947.13342 | 2 | 4.89E-06 | 0.78 | 3.04 | - | 616.6  |
| PM-4, 5536 - 5610                                                                 | K.LQVELDNVTGLLSQSDSK.S           | 1947.13342 | 2 | 4.00E-07 | 0.98 | 5.46 | - | 1865.4 |
| PM-3, 5767 - 5845                                                                 | K.LQVELDNVTGLLSQSDSK.S           | 1947.13342 | 2 | 2.42E-05 | 0.83 | 3.31 | - | 795.2  |
| PM-1, 6023 - 6029                                                                 | K.LQVELDNVTGLLSQSDSK.S           | 1947.13342 | 2 | 2.51E-07 | 0.97 | 5.77 | - | 1443.9 |
| PM-3, 5677                                                                        | K.LQVELDNVTGLLSQSDSK.S           | 1947.13342 | 2 | 1.32E-05 | 0.93 | 3.94 | - | 1192.5 |
| PM-5, 5657 - 5721                                                                 | K.LQVELDNVTGLLSQSDSK.S           | 1947.13342 | 2 | 7.51E-07 | 0.94 | 4.55 | - | 947.8  |
| PM-5, 5520 - 5594                                                                 | K.LQVELDNVTGLLSQSDSK.S           | 1947.13342 | 2 | 1.03E-08 | 0.97 | 6.06 | - | 1477.2 |
| PM-3, 5547 - 5619                                                                 | K.LQVELDNVTGLLSQSDSK.S           | 1947.13342 | 2 | 2.00E-04 | 0.96 | 4.70 | - | 1332.7 |
| PM-1, 4043 - 4121                                                                 | R.LTEM*ETLQSQLMAEK.L             | 1769.03151 | 2 | 7.40E-04 | 0.98 | 4.47 | - | 2678.4 |
| PM-2, 4267                                                                        | R.LTEM*ETLQSQLMAEK.L             | 1769.03151 | 2 | 3.56E-05 | 0.81 | 3.06 | - | 817.3  |
| PM-3, 4217 - 4255                                                                 | R.LTEM*ETLQSQLMAEK.L             | 1769.03151 | 2 | 7.48E-07 | 0.88 | 3.09 | - | 1166.7 |
| PM-1, 2595                                                                        | K.NKHEAMITDLEER.L                | 1586.75247 | 2 | 7.13E-05 | 0.87 | 3.31 | - | 789.1  |
| PM-2, 2149 - 2162                                                                 | K.NKHEAMITDLEER.L                | 1586.75247 | 2 | 1.31E-04 | 0.92 | 3.36 | - | 1090.9 |
| PM-1, 5268 - 5277                                                                 | K.NLPIYSEEVEM*YK.G               | 1744.98660 | 3 | 3.98E-05 | 0.92 | 3.77 | - | 1455.9 |
| PM-1, 5137 - 5215                                                                 | K.NM*DPLNDNIATLLHQSSDK.F         | 2143.32109 | 2 | 7.31E-06 | 0.67 | 2.63 | - | 610.2  |
| PM-4, 4641 - 4645                                                                 | K.NM*DPLNDNIATLLHQSSDK.F         | 2143.32109 | 2 | 8.19E-05 | 0.63 | 2.61 | - | 604.9  |
| PM-4, 6461                                                                        | K.PAGPPGILALDEECWFPK.A           | 2111.44835 | 2 | 5.90E-05 | 0.95 | 4.19 | - | 1459.0 |
| PM-1, 3183                                                                        | R.QAQQRDELADIEIANSNGK.G          | 2090.15168 | 2 | 6.88E-04 | 0.76 | 3.27 | - | 458.2  |
| PM-1, 3187                                                                        | R.QAQQRDELADIEIANSNGK.G          | 2090.15168 | 3 | 2.21E-04 | 0.87 | 3.44 | - | 1127.5 |
| PM-3, 2357                                                                        | K.QIATLHAQVADMK.K                | 1426.66697 | 1 | 7.88E-05 | 0.65 | 2.81 | - | 169.6  |
| PM-5, 3221                                                                        | R.RGDLPFVVR.R                    | 1156.36217 | 2 | 2.48E-06 | 0.95 | 3.90 | - | 1269.8 |
| PM-2, 3089 - 3093                                                                 | R.RGDLPFVVR.R                    | 1156.36217 | 2 | 8.41E-07 | 0.96 | 4.37 | - | 1298.0 |
| PM-1, 3568                                                                        | R.RGDLPFVVR.R                    | 1156.36217 | 2 | 1.50E-05 | 0.93 | 3.91 | - | 1055.2 |
| PM-3, 2987 - 3056                                                                 | R.RGDLPFVVR.R                    | 1156.36217 | 2 | 3.56E-06 | 0.96 | 4.18 | - | 1320.9 |
| PM-3, 6367                                                                        | R.RKLEGDSTLSDQIAELQAQIAELK.M     | 2773.04667 | 2 | 8.83E-06 | 0.85 | 4.19 | - | 428.4  |
| PM-3, 2489                                                                        | K.RQAQQRDELADIEIANSNGK.G         | 2246.33803 | 3 | 2.03E-04 | 0.93 | 4.03 | - | 1334.3 |
| PM-1, 3361                                                                        | R.SMMQDREDQSILCTGESGAGK.T        | 2301.52207 | 2 | 1.44E-04 | 0.93 | 4.67 | - | 1201.1 |
| PM-3, 2955 - 2959                                                                 | R.SMMQDREDQSILCTGESGAGK.T        | 2301.52207 | 2 | 1.12E-04 | 0.90 | 4.43 | - | 1141.8 |
| PM-1, 3681                                                                        | K.TDLLLEPYNK.Y                   | 1206.36989 | 2 | 1.36E-05 | 0.85 | 3.38 | - | 887.1  |
| PM-5, 4069 - 4080                                                                 | K.TELEDTLDSTAAQQELR.S            | 1921.00969 | 2 | 2.47E-05 | 0.81 | 3.74 | - | 825.8  |
| PM-1, 4371 - 4399                                                                 | K.TELEDTLDSTAAQQELR.S            | 1921.00969 | 2 | 5.84E-05 | 0.94 | 3.91 | - | 1486.8 |
| PM-3, 4080                                                                        | K.TELEDTLDSTAAQQELR.S            | 1921.00969 | 2 | 5.08E-06 | 0.91 | 3.26 | - | 1289.7 |
| PM-2, 4147                                                                        | K.TELEDTLDSTAAQQELR.S            | 1921.00969 | 2 | 4.17E-06 | 0.87 | 3.30 | - | 1225.1 |
| PM-1, 3292                                                                        | K.VEAQLQELQVK.F                  | 1285.47179 | 2 | 1.12E-04 | 0.95 | 3.65 | - | 1563.5 |
| PM-1, 5164                                                                        | K.VEDM*AELTCLNEASVLHNLK.E        | 2303.59917 | 2 | 7.13E-08 | 0.85 | 4.00 | - | 642.8  |
| PM-2, 4845                                                                        | K.VEDM*AELTCLNEASVLHNLK.E        | 2303.59917 | 2 | 5.87E-06 | 0.90 | 3.95 | - | 836.6  |
| PM-2, 5633 - 5667                                                                 | K.VEDMAELTCLNEASVLHNLK.E         | 2287.59977 | 2 | 1.04E-07 | 0.63 | 3.55 | - | 249.4  |
| PM-1, 5908 - 5964                                                                 | K.VEDMAELTCLNEASVLHNLK.E         | 2287.59977 | 2 | 1.11E-07 | 0.93 | 4.69 | - | 688.3  |
| PM-4, 5541 - 5597                                                                 | K.VEDMAELTCLNEASVLHNLK.E         | 2287.59977 | 2 | 1.88E-04 | 0.78 | 3.60 | - | 470.3  |
| PM-3, 4716                                                                        | K.VEDM*AELTCLNEASVLHNLK.E        | 2303.59917 | 2 | 5.83E-05 | 0.40 | 2.78 | - | 480.9  |
| PM-3, 5463 - 5519                                                                 | K.VEDMAELTCLNEASVLHNLK.E         | 2287.59977 | 2 | 1.56E-07 | 0.85 | 4.13 | - | 522.0  |
| PM-1, 6019 - 6075                                                                 | K.VEDMAELTCLNEASVLHNLK.E         | 2287.59977 | 2 | 8.80E-05 | 0.66 | 3.42 | - | 267.8  |
| PM-5, 4836                                                                        | K.VEDM*AELTCLNEASVLHNLK.E        | 2303.59917 | 2 | 2.50E-05 | 0.88 | 3.60 | - | 663.2  |
| PM-4, 5422 - 5480                                                                 | K.VEDMAELTCLNEASVLHNLK.E         | 2287.59977 | 2 | 7.03E-06 | 0.91 | 4.35 | - | 677.0  |
| PM-5, 5609 - 5634                                                                 | K.VEDMAELTCLNEASVLHNLK.E         | 2287.59977 | 2 | 6.98E-04 | 0.66 | 3.01 | - | 509.2  |
| PM-3, 5507                                                                        | K.VEDMAELTCLNEASVLHNLK.E         | 2287.59977 | 2 | 3.81E-06 | 0.88 | 3.78 | - | 645.9  |
| PM-1, 6472                                                                        | R.VISGVLQGNIVFK.K                | 1487.81155 | 2 | 1.62E-06 | 0.98 | 5.07 | - | 2195.8 |
| PM-1, 5013 - 5071                                                                 | K.VSHLLGINVDFTR.G                | 1572.79026 | 2 | 2.25E-05 | 0.85 | 2.97 | - | 987.9  |
| PM-1, 4084                                                                        | R.YEILTPNSIPK.G                  | 1275.47536 | 2 | 3.61E-04 | 0.78 | 2.73 | - | 850.9  |
| PM-2, 5931                                                                        | K.YLYVDKFNINPLAQADWAAK.K         | 2455.75199 | 3 | 3.28E-04 | 0.87 | 3.83 | - | 835.7  |
| PM-1, 6253                                                                        | K.YLYVDKFNINPLAQADWAAK.K         | 2455.75199 | 3 | 4.69E-06 | 0.84 | 3.42 | - | 1010.1 |



|                             |                                                                         |            |   |          |      |       |       |          |
|-----------------------------|-------------------------------------------------------------------------|------------|---|----------|------|-------|-------|----------|
| PM-5, 4304 - 4362           | R.AAAQLTYGSLCPPDDLADR.G                                                 | 2138.36748 | 2 | 2.30E-04 | 0.76 | 3.33  | -     | 493.4    |
| PM-5, 6296 - 6376           | R.GEEEFDFHDVAEDLGLLQFVR.L                                               | 2448.58352 | 2 | 5.10E-10 | 0.98 | 6.25  | -     | 2272.2   |
| PM-5, 6258                  | R.NEQLDWPYELKPSCIENSVTI                                                 | 2699.97273 | 2 | 2.07E-04 | 0.49 | 3.13  | -     | 362.7    |
| PM-5, 4904 - 4978           | R.WVQGEDILSLPEGTAR.L                                                    | 1771.95190 | 2 | 1.07E-04 | 0.78 | 3.21  | -     | 650.3    |
| gi 4826898 ref NP_005013.1  | profilin 1; profilin-1 [Homo sapiens]                                   |            |   | 5.41E-10 | 0.45 | 10.12 | 10.00 | 15054.2  |
| PM-11, 4456                 | R.SSFYVNGLTGGQK.C                                                       | 1471.63957 | 1 | 4.24E-05 | 0.35 | 2.37  | -     | 351.1    |
| PM-11, 4231                 | R.SSFYVNGLTGGQK.C                                                       | 1471.63957 | 1 | 5.41E-10 | 0.45 | 2.27  | -     | 338.8    |
| gi 29741246 ref XP_294070.1 | similar to Glyceraldehyde 3-phosphate dehydrogenase, liver (GAPDH) [Ho  |            |   | 7.82E-10 | 1.65 | 20.21 | 11.80 | 35032.0  |
| PM-8, 5486 - 5562           | K.LVINGNPITIFQER.D                                                      | 1614.87029 | 2 | 7.82E-10 | 0.89 | 3.58  | -     | 778.0    |
| PM-8, 6190                  | K.VLHDNFGIVGKLM*TTVHAITATQK.T                                           | 2612.04471 | 3 | 1.89E-06 | 0.75 | 3.24  | -     | 1067.8   |
| gi 4507729 ref NP_001060.1  | tubulin, beta polypeptide [Homo sapiens]                                |            |   | 9.15E-10 | 3.05 | 40.34 | 18.20 | 49906.7  |
| PM-6, 2495                  | K.EVDEQMLNVQNK.N                                                        | 1447.59668 | 1 | 3.06E-05 | 0.55 | 3.15  | -     | 314.9    |
| PM-11, 2727                 | K.EVDEQMLNVQNK.N                                                        | 1447.59668 | 1 | 2.39E-05 | 0.27 | 2.79  | -     | 292.4    |
| PM-4, 6254                  | K.GHYTEGAELVDSVLDVVR.K                                                  | 1960.13388 | 2 | 4.58E-05 | 0.98 | 5.28  | -     | 2077.0   |
| PM-6, 6076 - 6134           | K.GHYTEGAELVDSVLDVVR.K                                                  | 1960.13388 | 2 | 2.40E-08 | 0.99 | 6.72  | -     | 2683.4   |
| PM-3, 6301                  | K.GHYTEGAELVDSVLDVVR.K                                                  | 1960.13388 | 2 | 1.16E-07 | 0.99 | 6.63  | -     | 3171.1   |
| PM-6, 5866                  | K.LTTPYTDLNLHLVSATMSGVTTCLR.F                                           | 2710.08047 | 2 | 2.81E-04 | 0.67 | 3.00  | -     | 576.7    |
| PM-6, 6234                  | K.LTTPYTDLNLHLVSATMSGVTTCLR.F                                           | 2710.08047 | 2 | 1.84E-06 | 0.92 | 5.15  | -     | 711.5    |
| PM-1, 6519                  | K.LTTPYTDLNLHLVSATMSGVTTCLR.F                                           | 2710.08047 | 2 | 9.15E-10 | 0.96 | 5.78  | -     | 1109.5   |
| PM-6, 6095 - 6154           | R.SGPFQGIQRPDNLVFGQSGAGNNWAK.G                                          | 2800.03898 | 3 | 1.50E-05 | 0.83 | 3.49  | -     | 927.2    |
| gi 29739414 ref XP_294015.1 | similar to Glyceraldehyde 3-phosphate dehydrogenase, liver (GAPDH) [Ho  |            |   | 1.28E-09 | 0.78 | 10.19 | 5.80  | 26916.7  |
| PM-8, 4858                  | K.LISWYDNEFGYSNR.V                                                      | 1764.87478 | 2 | 1.28E-09 | 0.78 | 2.84  | -     | 703.2    |
| gi 29742827 ref XP_294099.1 | similar to myosin:SUBUNIT=regulatory light chain [Homo sapiens]         |            |   | 1.53E-09 | 0.53 | 10.13 | 7.40  | 17094.0  |
| PM-10, 3655 - 3719          | R.FTDEEVDLYR.E                                                          | 1416.47127 | 1 | 1.53E-09 | 0.53 | 2.68  | -     | 377.0    |
| PM-10, 3640 - 3695          | R.FTDEEVDLYR.E                                                          | 1416.47127 | 1 | 3.02E-06 | 0.29 | 1.89  | -     | 468.9    |
| gi 7669492 ref NP_002037.2  | glyceraldehyde-3-phosphate dehydrogenase [Homo sapiens]                 |            |   | 2.56E-09 | 2.45 | 30.33 | 11.60 | 36053.0  |
| PM-8, 3270 - 3342           | R.GALQNIIPASTGA.AA                                                      | 1412.61680 | 1 | 5.98E-07 | 0.62 | 3.09  | -     | 357.8    |
| PM-8, 6278 - 6279           | K.VIHDNFGIVGLMTT*VHAITATQK.T                                            | 2596.98694 | 3 | 1.43E-07 | 0.98 | 6.70  | -     | 2070.4   |
| PM-8, 4748 - 4806           | R.VIISAPSDAPMFMVGMVNH.EK.Y                                              | 2214.59387 | 2 | 2.56E-09 | 0.86 | 4.00  | -     | 446.9    |
| gi 4759080 ref NP_004159.1  | succinate dehydrogenase complex, subunit A, flavoprotein precursor; suc |            |   | 5.37E-09 | 1.72 | 20.27 | 8.70  | 72689.1  |
| PM-5, 6216                  | R.AGLPCQDLFVQFHTPIGYGAGCLITEGCR.G                                       | 3368.81096 | 3 | 5.04E-05 | 0.76 | 3.43  | -     | 498.6    |
| PM-5, 4338                  | R.HVNGQDQIVPGLYACGEAACASVHG.ANR.L                                       | 2953.22296 | 3 | 5.37E-09 | 0.96 | 5.48  | -     | 1478.5   |
| gi 4502565 ref NP_001740.1  | calpain, small subunit 1; calpain, small polypeptide; calcium-dependent |            |   | 5.72E-09 | 4.34 | 50.22 | 26.10 | 28315.5  |
| PM-10, 6239                 | R.LFAQLAGDDM*EVSAATELMLN.LK.V                                           | 2540.89556 | 2 | 5.72E-09 | 0.87 | 3.62  | -     | 762.1    |
| PM-10, 2584                 | R.SMVAVMDSDTTGG.L                                                       | 1342.52228 | 1 | 4.91E-05 | 0.87 | 3.63  | -     | 635.0    |
| PM-10, 2139                 | R.THYSNIEANESSEV.R.Q                                                    | 1778.81502 | 2 | 5.39E-08 | 0.87 | 2.90  | -     | 1061.4   |
| PM-10, 6205                 | R.YSDESGNM*DFDNFISCLVR.L                                                | 2286.44088 | 2 | 4.11E-06 | 0.93 | 4.31  | -     | 942.1    |
| PM-9, 6275                  | R.YSDESGNMDFNFISCLVR.L                                                  | 2270.44148 | 2 | 1.91E-07 | 0.80 | 3.28  | -     | 580.8    |
| gi 7705767 ref NP_057086.1  | CGI-49 protein [Homo sapiens]                                           |            |   | 5.89E-09 | 0.85 | 10.19 | 6.80  | 46920.8  |
| PM-7, 6523                  | K.GPEAGYVATPIAMVQAAMTLLSDASHLPK.A                                       | 2941.41545 | 3 | 5.89E-09 | 0.85 | 3.71  | -     | 782.7    |
| gi 4501885 ref NP_001092.1  | beta actin; beta cytoskeletal actin [Homo sapiens]                      |            |   | 6.26E-09 | 6.23 | 70.32 | 34.90 | 41736.5  |
| PM-7, 6244 - 6327           | R.CPEALFQPSFLGMESCIGHHTFFNSIMK.C                                        | 3233.70748 | 3 | 2.68E-04 | 0.93 | 5.08  | -     | 726.2    |
| PM-7, 2063 - 2136           | R.GYSFTTAAER.E                                                          | 1133.19273 | 2 | 1.34E-04 | 0.89 | 2.93  | -     | 1329.7   |
| PM-7, 4688 - 4696           | R.KDLYANTVLSGGTMTMPGIADR.M                                              | 2344.62976 | 2 | 2.66E-04 | 0.88 | 3.31  | -     | 938.7    |
| PM-7, 4322 - 4380           | R.KDLYANTVLSGGTMTMPGIADR.M                                              | 2344.62976 | 2 | 9.30E-09 | 0.88 | 3.70  | -     | 608.5    |
| PM-8, 4532                  | R.KDLYANTVLSGGTMTMPGIADR.M                                              | 2344.62976 | 2 | 2.43E-04 | 0.76 | 2.60  | -     | 800.1    |
| PM-7, 6490                  | K.LCYVALDFEGEMATAASSSSLEK.S                                             | 2551.83185 | 2 | 3.92E-05 | 0.76 | 2.77  | -     | 634.5    |
| PM-4, 5673 - 5700           | R.TTGIVMDSGGDGVTH*TVPIYEGYALPHAILR.L                                    | 3185.59928 | 3 | 7.57E-07 | 0.97 | 5.89  | -     | 1887.8   |
| PM-3, 5711                  | R.TTGIVMDSGGDGVTH*TVPIYEGYALPHAILR.L                                    | 3185.59928 | 3 | 1.10E-05 | 0.88 | 3.91  | -     | 848.6    |
| PM-2, 5825 - 5829           | R.TTGIVMDSGGDGVTH*TVPIYEGYALPHAILR.L                                    | 3185.59928 | 3 | 1.22E-08 | 0.98 | 5.77  | -     | 2502.8   |
| PM-8, 5739 - 5794           | R.TTGIVMDSGGDGVTH*TVPIYEGYALPHAILR.L                                    | 3185.59928 | 3 | 7.45E-04 | 0.87 | 3.84  | -     | 910.8    |
| PM-9, 5389 - 5447           | R.TTGIVMDSGGDGVTH*TVPIYEGYALPHAILR.L                                    | 3201.59868 | 3 | 7.94E-05 | 0.69 | 3.04  | -     | 786.0    |
| PM-9, 5737 - 5799           | R.TTGIVMDSGGDGVTH*TVPIYEGYALPHAILR.L                                    | 3185.59928 | 3 | 4.35E-08 | 0.97 | 5.89  | -     | 1688.5   |
| PM-7, 5878 - 5956           | R.TTGIVMDSGGDGVTH*TVPIYEGYALPHAILR.L                                    | 3185.59928 | 3 | 1.19E-05 | 0.89 | 4.34  | -     | 1012.3   |
| PM-7, 5778 - 5820           | R.TTGIVMDSGGDGVTH*TVPIYEGYALPHAILR.L                                    | 3185.59928 | 3 | 1.92E-05 | 0.95 | 5.52  | -     | 1257.6   |
| PM-7, 5666 - 5722           | R.TTGIVMDSGGDGVTH*TVPIYEGYALPHAILR.L                                    | 3185.59928 | 3 | 5.62E-04 | 0.97 | 6.01  | -     | 1513.5   |
| PM-7, 5550 - 5610           | R.TTGIVMDSGGDGVTH*TVPIYEGYALPHAILR.L                                    | 3185.59928 | 3 | 1.35E-06 | 0.96 | 5.54  | -     | 1307.0   |
| PM-7, 5438 - 5495           | R.TTGIVMDSGGDGVTH*TVPIYEGYALPHAILR.L                                    | 3185.59928 | 3 | 2.67E-05 | 0.84 | 3.82  | -     | 862.5    |
| PM-5, 5786 - 5793           | R.TTGIVMDSGGDGVTH*TVPIYEGYALPHAILR.L                                    | 3185.59928 | 3 | 1.47E-05 | 0.92 | 4.37  | -     | 1196.3   |
| PM-7, 5089 - 5147           | R.TTGIVMDSGGDGVTH*TVPIYEGYALPHAILR.L                                    | 3201.59868 | 3 | 4.76E-05 | 0.91 | 4.89  | -     | 972.3    |
| PM-7, 5322 - 5382           | R.TTGIVMDSGGDGVTH*TVPIYEGYALPHAILR.L                                    | 3185.59928 | 3 | 1.30E-05 | 0.82 | 4.01  | -     | 658.6    |
| PM-7, 5211 - 5271           | R.TTGIVMDSGGDGVTH*TVPIYEGYALPHAILR.L                                    | 3185.59928 | 3 | 6.26E-09 | 0.96 | 6.33  | -     | 1054.9   |
| PM-10, 5839                 | R.TTGIVMDSGGDGVTH*TVPIYEGYALPHAILR.L                                    | 3185.59928 | 3 | 1.14E-05 | 0.72 | 3.22  | -     | 516.3    |
| PM-7, 3442 - 3499           | R.VAPEEHPVLLTEAPLNPK.A                                                  | 1955.24351 | 2 | 2.38E-05 | 0.92 | 4.54  | -     | 717.6    |
| PM-7, 3306 - 3384           | R.VAPEEHPVLLTEAPLNPK.A                                                  | 1955.24351 | 2 | 2.34E-05 | 0.93 | 4.46  | -     | 887.2    |
| PM-7, 3223 - 3282           | R.VAPEEHPVLLTEAPLNPK.A                                                  | 1955.24351 | 3 | 5.18E-04 | 0.69 | 3.20  | -     | 893.2    |
| PM-7, 3180 - 3251           | R.VAPEEHPVLLTEAPLNPK.A                                                  | 1955.24351 | 2 | 5.05E-05 | 0.90 | 4.47  | -     | 673.0    |
| PM-7, 3103 - 3159           | R.VAPEEHPVLLTEAPLNPK.A                                                  | 1955.24351 | 2 | 3.83E-05 | 0.91 | 4.13  | -     | 835.0    |
| PM-6, 3434 - 3455           | R.VAPEEHPVLLTEAPLNPK.A                                                  | 1955.24351 | 2 | 8.55E-07 | 0.89 | 3.84  | -     | 811.0    |
| PM-5, 3632                  | R.VAPEEHPVLLTEAPLNPK.A                                                  | 1955.24351 | 2 | 6.01E-04 | 0.93 | 4.07  | -     | 988.0    |
| PM-8, 3564 - 3627           | R.VAPEEHPVLLTEAPLNPK.A                                                  | 1955.24351 | 2 | 1.83E-05 | 0.92 | 4.64  | -     | 758.4    |
| PM-3, 3556                  | R.VAPEEHPVLLTEAPLNPK.A                                                  | 1955.24351 | 2 | 1.83E-04 | 0.88 | 3.66  | -     | 633.2    |
| PM-2, 3618 - 3635           | R.VAPEEHPVLLTEAPLNPK.A                                                  | 1955.24351 | 3 | 6.69E-04 | 0.77 | 3.77  | -     | 490.0    |
| PM-9, 3629 - 3704           | R.VAPEEHPVLLTEAPLNPK.A                                                  | 1955.24351 | 2 | 1.50E-05 | 0.92 | 4.63  | -     | 840.2    |
| PM-2, 3609                  | R.VAPEEHPVLLTEAPLNPK.A                                                  | 1955.24351 | 2 | 3.22E-04 | 0.89 | 3.78  | -     | 862.6    |
| PM-1, 4047 - 4104           | R.VAPEEHPVLLTEAPLNPK.A                                                  | 1955.24351 | 3 | 2.10E-05 | 0.66 | 3.69  | -     | 660.2    |
| PM-10, 3779                 | R.VAPEEHPVLLTEAPLNPK.A                                                  | 1955.24351 | 2 | 7.20E-06 | 0.87 | 4.01  | -     | 699.5    |
| PM-1, 4035 - 4105           | R.VAPEEHPVLLTEAPLNPK.A                                                  | 1955.24351 | 2 | 6.98E-04 | 0.92 | 4.84  | -     | 663.4    |
| PM-11, 3780                 | R.VAPEEHPVLLTEAPLNPK.A                                                  | 1955.24351 | 2 | 3.67E-05 | 0.89 | 4.46  | -     | 535.6    |
| gi 17986258 ref NP_066299.2 | smooth muscle and non-muscle myosin alkali light chain isoform 1 [Homo  |            |   | 7.32E-09 | 3.57 | 40.22 | 37.10 | 16930.0  |
| PM-11, 2012 - 2075          | R.HVLVTLGEEK.M                                                          | 996.18547  | 2 | 4.73E-06 | 0.84 | 2.93  | -     | 577.1    |
| PM-11, 3920 - 3923          | K.NKDQGTEDYVEGLR.V                                                      | 1787.86505 | 2 | 1.48E-05 | 0.83 | 3.36  | -     | 640.4    |
| PM-11, 3435 - 3504          | K.NKDQGTEDYVEGLR.V                                                      | 1787.86505 | 2 | 7.32E-09 | 0.95 | 4.31  | -     | 1325.3   |
| PM-10, 3520 - 3601          | K.NKDQGTEDYVEGLR.V                                                      | 1787.86505 | 2 | 5.18E-05 | 0.91 | 3.71  | -     | 1060.5   |
| PM-11, 3071 - 3127          | R.VFDKEGNGTVMGAIR.H                                                     | 1723.93228 | 2 | 5.61E-06 | 0.88 | 2.94  | -     | 1192.8   |
| PM-11, 6199                 | K.VLDFEHLFPM*LQITVAK.N                                                  | 1905.24957 | 2 | 6.65E-04 | 0.90 | 3.84  | -     | 745.2    |
| gi 27498267 ref XP_209737.1 | similar to tyrosine 3/tryptophan 5-monooxygenase activation protein,    |            |   | 7.67E-09 | 0.22 | 10.20 | 12.60 | 11063.6  |
| PM-9, 6253                  | R.DICNDVLSLLEK.F                                                        | 1419.62613 | 1 | 2.09E-05 | 0.71 | 3.29  | -     | 604.8    |
| PM-9, 5688                  | R.DICNDVLSLLEK.F                                                        | 1419.62613 | 1 | 7.67E-09 | 0.22 | 1.81  | -     | 696.7    |
| gi 4557677 ref NP_000203.1  | integrin beta chain, beta 3 precursor; platelet glycoprotein IIIa precu |            |   | 7.95E-09 | 6.47 | 90.25 | 22.30 | 87185.6  |
| PM-4, 2414 - 2416           | R.AKWDANNPLYK.E                                                         | 1421.58225 | 1 | 2.09E-04 | 0.20 | 2.41  | -     | 246.4    |
| PM-4, 4668                  | R.CDLKENLLKDNCAPIESIEFFVSEAR.V                                          | 2936.26729 | 3 | 3.32E-04 | 0.78 | 4.24  | -     | 448.7    |
| PM-4, 4605                  | K.DDLWSIQNLGK.L                                                         | 1390.52332 | 1 | 7.95E-09 | 0.51 | 2.82  | -     | 361.3    |
| PM-4, 2348                  | R.GKCEGSCVCIQPGSYGDTCEK.C                                               | 2553.83574 | 2 | 2.77E-05 | 0.92 | 4.82  | -     | 380.6    |
| PM-4, 2186 - 2253           | K.HVLTLDQVTR.F                                                          | 1283.45912 | 2 | 1.13E-05 | 0.90 | 3.43  | -     | 760.9    |
| PM-4, 5124 - 5185           | R.LAGIVQPDNDGQCHVSGDNHYSASTMTDYPYSLGLMTEK.L                             | 3996.37037 | 3 | 7.78E-06 | 0.57 | 3.10  | -     | 441.7    |
| PM-4, 4638 - 4696           | R.NRDAPEGGFDAIMQATVCDCK.I                                               | 2325.52182 | 2 | 1.15E-05 | 0.96 | 4.94  | -     | 1374.0   |
| PM-4, 4738 - 4808           | R.NRDAPEGGFDAIMQATVCDCK.I                                               | 2325.52182 | 2 | 9.72E-07 | 0.90 | 4.14  | -     | 863.6    |
| PM-4, 2372 - 2433           | R.VLEDRPLSDKSGSDSSQVTVQSPQR.I                                           | 2686.87396 | 3 | 5.29E-04 | 0.84 | 3.70  | -     | 1002.3   |
| PM-4, 2412                  | R.VLEDRPLSDKSGSDSSQVTVQSPQR.I                                           | 2686.87396 | 2 | 5.90E-04 | 0.59 | 2.97  | -     | 297.2    |
| PM-4, 2440 - 2501           | K.YCECDDFSCVR.Y                                                         | 1511.64234 | 2 | 6.36E-06 | 0.85 | 3.05  | -     | 596.0    |
| gi 6681259 ref NP_031377.1  | multimerin [Homo sapiens]                                               |            |   | 9.59E-09 | 5.34 | 60.26 | 6.20  | 138070.8 |
| PM-1, 4071                  | R.DOALQLQVLSNR.F                                                        | 1385       |   |          |      |       |       |          |

|                             |                                                                         |            |   |          |       |        |       |          |
|-----------------------------|-------------------------------------------------------------------------|------------|---|----------|-------|--------|-------|----------|
| PM-2, 6521                  | K.TM*TIINNAIDFIQDNALYK.E                                                | 2215.51196 | 2 | 1.09E-06 | 0.79  | 3.98   | -     | 344.0    |
| PM-3, 6475                  | K.TMTIINNAIDFIQDNALYK.E                                                 | 2199.51256 | 2 | 6.07E-06 | 0.83  | 3.50   | -     | 529.4    |
| PM-1, 6551 - 6625           | K.TM*TIINNAIDFIQDNALYK.E                                                | 2215.51196 | 2 | 6.36E-05 | 0.53  | 3.48   | -     | 286.2    |
| PM-1, 6581                  | K.TMTIINNAIDFIQDNALYK.E                                                 | 2199.51256 | 2 | 1.02E-04 | 0.91  | 4.02   | -     | 662.0    |
| gi 4506677 ref NP_002942.1  | ribohorin II [Homo sapiens]                                             |            |   | 1.28E-08 | 1.53  | 20.19  | 6.70  | 69301.6  |
| PM-5, 4548 - 4574           | K.ISTEVGITNVDLSTVDKQSIAPK.T                                             | 2531.79855 | 2 | 1.28E-08 | 0.81  | 3.88   | -     | 717.7    |
| PM-5, 6292                  | K.TSFTVPVGDVFLNFMNVK.F                                                  | 2046.33178 | 2 | 1.73E-06 | 0.72  | 2.56   | -     | 492.7    |
| gi 5729887 ref NP_006624.1  | IQ motif containing GTPase activating protein 2 [Homo sapiens]          |            |   | 1.38E-08 | 0.98  | 10.26  | 1.10  | 180611.0 |
| PM-3, 4593                  | K.LPYDVTTEQALTYPEVK.N                                                   | 1968.19269 | 2 | 2.25E-05 | 0.93  | 3.78   | -     | 1397.1   |
| PM-4, 4561 - 4568           | K.LPYDVTTEQALTYPEVK.N                                                   | 1968.19269 | 2 | 1.38E-08 | 0.98  | 5.12   | -     | 2613.5   |
| PM-2, 4671                  | K.LPYDVTTEQALTYPEVK.N                                                   | 1968.19269 | 2 | 2.75E-06 | 0.86  | 3.22   | -     | 971.2    |
| gi 4506677 ref NP_002996.1  | selectin P precursor; Selectin P (granulocyte membrane protein, 140kD;) |            |   | 1.52E-08 | 1.73  | 20.28  | 5.70  | 90844.7  |
| PM-3, 4031                  | K.AVQCQHLEAPSEGTM*DCVHPLTAFAYGSSCK.F                                    | 3469.85079 | 3 | 1.70E-04 | 0.81  | 4.10   | -     | 515.3    |
| PM-3, 2032 - 2065           | K.HALCYTASCQDMSCSK.Q                                                    | 1920.16132 | 2 | 1.52E-08 | 0.92  | 4.16   | -     | 550.0    |
| gi 4758086 ref NP_004069.1  | cysteine and glycine-rich protein 1; cysteine-rich protein; LIM-domain  |            |   | 1.59E-08 | 1.76  | 20.24  | 20.20 | 20567.3  |
| PM-9, 3323 - 3383           | K.GYGYGGAGLSTLTDKGESLGK.H                                               | 2160.32665 | 2 | 5.82E-04 | 0.79  | 3.80   | -     | 491.4    |
| PM-11, 3259                 | K.NLDSTTVAVHGEIYCK.S                                                    | 1937.12034 | 2 | 1.59E-08 | 0.96  | 4.51   | -     | 1285.1   |
| PM-9, 3107 - 3111           | K.NLDSTTVAVHGEIYCK.S                                                    | 1937.12034 | 2 | 7.16E-07 | 0.96  | 4.89   | -     | 1259.1   |
| gi 4501881 ref NP_001091.1  | alpha 1 actin precursor; alpha skeletal muscle actin [Homo sapiens] [MA |            |   | 1.73E-08 | 2.60  | 30.25  | 8.50  | 42050.8  |
| PM-7, 2307 - 2367           | K.EITALAPSTMK.I                                                         | 1162.38206 | 2 | 7.18E-04 | 0.80  | 3.01   | -     | 478.0    |
| PM-1, 3003                  | K.EITALAPSTMK.I                                                         | 1162.38206 | 2 | 3.25E-04 | 0.73  | 2.50   | -     | 695.1    |
| PM-6, 4526 - 4595           | K.SYELPDGGVITIGNER.F                                                    | 1791.93998 | 2 | 5.69E-08 | 0.86  | 3.52   | -     | 658.4    |
| PM-2, 4793 - 4849           | K.SYELPDGGVITIGNER.F                                                    | 1791.93998 | 2 | 3.59E-05 | 0.91  | 3.94   | -     | 870.0    |
| PM-1, 5069 - 5127           | K.SYELPDGGVITIGNER.F                                                    | 1791.93998 | 2 | 5.81E-06 | 0.91  | 4.35   | -     | 801.1    |
| PM-7, 4204 - 4264           | K.SYELPDGGVITIGNER.F                                                    | 1791.93998 | 2 | 7.83E-07 | 0.95  | 4.34   | -     | 968.8    |
| PM-10, 4839 - 4871          | K.SYELPDGGVITIGNER.F                                                    | 1791.93998 | 2 | 6.42E-07 | 0.92  | 3.77   | -     | 823.4    |
| PM-7, 4631 - 4707           | K.SYELPDGGVITIGNER.F                                                    | 1791.93998 | 2 | 1.27E-05 | 0.96  | 4.69   | -     | 979.9    |
| PM-7, 4796 - 4879           | K.SYELPDGGVITIGNER.F                                                    | 1791.93998 | 2 | 1.73E-08 | 0.94  | 3.92   | -     | 1045.7   |
| PM-9, 4697 - 4780           | K.SYELPDGGVITIGNER.F                                                    | 1791.93998 | 2 | 5.95E-06 | 0.94  | 4.39   | -     | 959.9    |
| PM-12, 5112                 | K.SYELPDGGVITIGNER.F                                                    | 1791.93998 | 2 | 1.15E-04 | 0.70  | 2.78   | -     | 412.0    |
| PM-7, 4244 - 4300           | K.YPIEHGIIITNWDMEK.I                                                    | 1962.17174 | 2 | 2.59E-05 | 0.94  | 5.08   | -     | 730.9    |
| PM-8, 4144 - 4219           | K.YPIEHGIIITNWDMEK.I                                                    | 1962.17174 | 2 | 9.54E-04 | 0.88  | 3.98   | -     | 639.1    |
| PM-9, 4149 - 4207           | K.YPIEHGIIITNWDMEK.I                                                    | 1962.17174 | 2 | 3.97E-04 | 0.88  | 4.40   | -     | 543.5    |
| gi 29737978 ref XP_290747.1 | similar to Myosin heavy chain, nonmuscle type B (Cellular myosin heavy  |            |   | 1.74E-08 | 2.32  | 30.23  | 2.00  | 191380.7 |
| PM-4, 3056 - 3058           | K.ADFCIHYAGK.V                                                          | 1295.49161 | 2 | 1.35E-04 | 0.95  | 4.00   | -     | 1213.2   |
| PM-1, 3619                  | K.ADFCIHYAGK.V                                                          | 1295.49161 | 2 | 3.00E-06 | 0.95  | 4.08   | -     | 1433.4   |
| PM-4, 3077                  | K.ADFCIHYAGK.V                                                          | 1295.49161 | 1 | 6.16E-06 | 0.59  | 2.46   | -     | 575.5    |
| PM-2, 3210                  | K.ADFCIHYAGK.V                                                          | 1295.49161 | 2 | 9.70E-07 | 0.66  | 2.68   | -     | 547.8    |
| PM-4, 2341                  | R.AGVLAAHLEER.D                                                         | 1224.34854 | 1 | 1.56E-04 | 0.39  | 2.47   | -     | 410.2    |
| PM-4, 2344 - 2366           | R.AGVLAAHLEER.D                                                         | 1224.34854 | 2 | 4.43E-07 | 0.95  | 4.45   | -     | 1369.4   |
| PM-1, 2947                  | R.AGVLAAHLEER.D                                                         | 1224.34854 | 2 | 2.05E-07 | 0.96  | 4.34   | -     | 1533.6   |
| PM-10, 2675 - 2736          | R.AGVLAAHLEER.D                                                         | 1224.34854 | 2 | 7.40E-08 | 0.78  | 2.85   | -     | 852.2    |
| PM-2, 2481                  | R.AGVLAAHLEER.D                                                         | 1224.34854 | 2 | 8.59E-07 | 0.93  | 4.11   | -     | 1269.3   |
| PM-8, 2534 - 2550           | R.AGVLAAHLEER.D                                                         | 1224.34854 | 2 | 5.09E-04 | 0.81  | 3.23   | -     | 740.1    |
| PM-5, 2646 - 2661           | R.AGVLAAHLEER.D                                                         | 1224.34854 | 2 | 7.49E-05 | 0.89  | 3.68   | -     | 980.0    |
| PM-11, 2732                 | R.AGVLAAHLEER.D                                                         | 1224.34854 | 2 | 1.78E-05 | 0.82  | 3.00   | -     | 909.7    |
| PM-2, 3518 - 3522           | K.VDYKADEWLMK.N                                                         | 1398.60886 | 2 | 1.74E-08 | 0.89  | 3.53   | -     | 863.8    |
| PM-4, 3378 - 3386           | K.VDYKADEWLMK.N                                                         | 1398.60886 | 2 | 3.83E-05 | 0.86  | 3.38   | -     | 718.3    |
| gi 4758012 ref NP_004850.1  | clathrin heavy chain; clathrin, heavy polypeptide-like 2 [Homo sapiens] |            |   | 1.93E-08 | 4.13  | 50.23  | 5.20  | 191612.6 |
| PM-2, 6589 - 6590           | K.AFMETADLPNELIELEK.I                                                   | 1948.26956 | 2 | 4.71E-07 | 0.81  | 3.68   | -     | 375.0    |
| PM-4, 3025                  | R.KFNALFAQGNYSAAK.V                                                     | 1759.94281 | 2 | 5.50E-06 | 0.87  | 3.44   | -     | 688.1    |
| PM-4, 4066                  | R.LASTLVHLGEYQAAVDGAR.K                                                 | 1972.19103 | 2 | 7.01E-06 | 0.86  | 3.67   | -     | 754.2    |
| PM-2, 4246                  | R.LASTLVHLGEYQAAVDGAR.K                                                 | 1972.19103 | 2 | 3.39E-07 | 0.92  | 4.28   | -     | 1006.8   |
| PM-3, 4192                  | R.LASTLVHLGEYQAAVDGAR.K                                                 | 1972.19103 | 2 | 1.02E-06 | 0.93  | 4.53   | -     | 867.4    |
| PM-5, 4230                  | R.LASTLVHLGEYQAAVDGAR.K                                                 | 1972.19103 | 2 | 7.46E-06 | 0.91  | 4.16   | -     | 974.9    |
| PM-1, 4579                  | R.LASTLVHLGEYQAAVDGAR.K                                                 | 1972.19103 | 2 | 1.80E-05 | 0.95  | 4.51   | -     | 1257.3   |
| PM-8, 4044                  | K.LHIIIEVGPPTGNQFPK.K                                                   | 1946.23831 | 2 | 7.35E-04 | 0.82  | 3.56   | -     | 516.1    |
| PM-4, 3890 - 3893           | K.LHIIIEVGPPTGNQFPK.K                                                   | 1946.23831 | 2 | 1.71E-04 | 0.63  | 3.19   | -     | 330.7    |
| PM-1, 5039 - 5095           | R.TSIDAYDNFDNISLAQR.L                                                   | 1944.04818 | 2 | 1.93E-08 | 0.89  | 3.63   | -     | 1029.6   |
| PM-3, 4755                  | R.TSIDAYDNFDNISLAQR.L                                                   | 1944.04818 | 2 | 8.79E-07 | 0.91  | 4.30   | -     | 645.3    |
| PM-2, 4846 - 4911           | R.TSIDAYDNFDNISLAQR.L                                                   | 1944.04818 | 2 | 3.20E-08 | 0.86  | 3.48   | -     | 1182.2   |
| gi 30147623 ref XP_293669.2 | similar to actinin, alpha 4 [Homo sapiens]                              |            |   | 2.21E-08 | 0.78  | 10.16  | 3.50  | 57794.4  |
| PM-4, 3650 - 3714           | K.LSGSNPYTTPVQIINSK.W                                                   | 1921.14079 | 2 | 2.21E-08 | 0.78  | 3.16   | -     | 723.0    |
| gi 13518026 ref NP_004978.2 | LIM and senescent cell antigen-like domains 1 [Homo sapiens]            |            |   | 2.29E-08 | 2.37  | 30.27  | 12.60 | 37251.2  |
| PM-8, 6258                  | R.CDLCQEVLDIGFVK.N                                                      | 1768.04797 | 2 | 2.29E-08 | 0.98  | 5.41   | -     | 2102.9   |
| PM-8, 2562 - 2618           | R.ELKGELYCLPCHDK.M                                                      | 1763.03141 | 2 | 6.29E-04 | 0.50  | 3.02   | -     | 373.2    |
| PM-8, 3170 - 3215           | R.VIEGDVVSALNK.A                                                        | 1244.41966 | 1 | 7.58E-05 | 0.90  | 4.08   | -     | 711.4    |
| gi 28373103 ref NP_005164.2 | sarco/endoplasmic reticulum Ca2+ -ATPase isoform a; ATPase, Ca(2+)-tra  |            |   | 2.34E-08 | 2.24  | 30.25  | 6.00  | 109255.5 |
| PM-2, 6258 - 6261           | R.DIVPGDIEVAVGDKVPADLR.L                                                | 2178.47138 | 2 | 1.96E-06 | 0.93  | 4.60   | -     | 835.9    |
| PM-4, 6036                  | R.IVENLQSFNEITAMTGDGVNDAPALK.K                                          | 2749.04707 | 2 | 2.34E-08 | 0.94  | 5.02   | -     | 906.8    |
| PM-2, 6169                  | R.IVENLQSFNEITAMTGDGVNDAPALK.K                                          | 2749.04707 | 2 | 2.49E-04 | 0.66  | 3.02   | -     | 558.3    |
| PM-4, 3272                  | K.NMFLFSGTNTSGK.A                                                       | 1370.55705 | 1 | 2.67E-06 | 0.36  | 2.87   | -     | 212.0    |
| gi 4504391 ref NP_000179.1  | hexokinase 1 isoform HKI; brain form hexokinase [Homo sapiens]          |            |   | 2.35E-08 | 1.55  | 20.20  | 4.40  | 102502.4 |
| PM-4, 5508 - 5513           | R.AILQQLGLNSTCDDSLVKT                                                   | 2089.39939 | 2 | 1.32E-04 | 0.69  | 2.76   | -     | 703.1    |
| PM-4, 5881 - 5941           | R.TPDGTENGDFLALDLGGTNR.F                                                | 2211.33051 | 2 | 2.35E-08 | 0.86  | 4.08   | -     | 600.0    |
| gi 21361755 ref NP_004090.3 | stomatin; erythrocyte membrane protein band 7.2 (stomatin) [Homo sapie  |            |   | 2.61E-08 | 3.51  | 40.32  | 17.00 | 31708.5  |
| PM-9, 3149 - 3152           | K.NLSQILSDR.E                                                           | 1046.15975 | 2 | 3.81E-04 | 0.75  | 2.69   | -     | 659.7    |
| PM-8, 6250                  | K.NLSQILSDREEIAHNM*QSTLDDATDAWGK.V                                      | 3373.65339 | 3 | 8.86E-04 | 0.95  | 5.21   | -     | 1496.9   |
| PM-9, 6263                  | K.NLSQILSDREEIAHNM*QSTLDDATDAWGK.V                                      | 3373.65339 | 3 | 4.68E-06 | 0.97  | 6.47   | -     | 1785.0   |
| PM-9, 5923 - 5995           | K.NLSQILSDREEIAHNM*QSTLDDATDAWGK.V                                      | 3389.65279 | 3 | 2.88E-05 | 0.93  | 4.58   | -     | 1330.5   |
| PM-9, 3591 - 3647           | R.VQNATLAVANITNADSATR.L                                                 | 1931.09731 | 2 | 7.32E-05 | 0.96  | 4.81   | -     | 1048.0   |
| PM-9, 3703 - 3764           | R.VQNATLAVANITNADSATR.L                                                 | 1931.09731 | 2 | 5.74E-08 | 0.95  | 4.84   | -     | 855.3    |
| PM-9, 3435 - 3516           | R.VQNATLAVANITNADSATR.L                                                 | 1931.09731 | 2 | 7.17E-05 | 0.87  | 4.19   | -     | 520.9    |
| PM-9, 3931 - 4000           | R.VQNATLAVANITNADSATR.L                                                 | 1931.09731 | 2 | 4.11E-07 | 0.97  | 5.44   | -     | 1108.2   |
| PM-9, 4041 - 4108           | R.VQNATLAVANITNADSATR.L                                                 | 1931.09731 | 2 | 9.73E-05 | 0.88  | 3.70   | -     | 869.8    |
| PM-9, 4164 - 4235           | R.VQNATLAVANITNADSATR.L                                                 | 1931.09731 | 2 | 3.86E-07 | 0.95  | 5.22   | -     | 783.5    |
| PM-9, 4259                  | R.VQNATLAVANITNADSATR.L                                                 | 1931.09731 | 2 | 3.02E-08 | 0.95  | 4.61   | -     | 907.7    |
| PM-9, 4465                  | R.VQNATLAVANITNADSATR.L                                                 | 1931.09731 | 2 | 1.03E-06 | 0.67  | 3.07   | -     | 433.4    |
| PM-9, 3819 - 3876           | R.VQNATLAVANITNADSATR.L                                                 | 1931.09731 | 2 | 8.39E-08 | 0.95  | 4.87   | -     | 978.4    |
| PM-8, 3550                  | R.VQNATLAVANITNADSATR.L                                                 | 1931.09731 | 2 | 7.49E-08 | 0.91  | 4.22   | -     | 640.1    |
| PM-10, 3635                 | R.VQNATLAVANITNADSATR.L                                                 | 1931.09731 | 2 | 2.61E-08 | 0.86  | 3.66   | -     | 655.6    |
| PM-11, 3704                 | R.VQNATLAVANITNADSATR.L                                                 | 1931.09731 | 2 | 2.43E-06 | 0.90  | 4.01   | -     | 844.9    |
| gi 5729997 ref NP_004154.2  | RAB27B, member RAS oncogene family [Homo sapiens]                       |            |   | 2.80E-08 | 2.80  | 30.29  | 18.80 | 24607.7  |
| PM-9, 5672                  | R.NWM*SQLQANAYCENPDIVLIGNK.A                                            | 2696.01232 | 2 | 1.52E-07 | 0.89  | 3.95   | -     | 622.4    |
| PM-9, 6100                  | R.NWMSQLQANAYCENPDIVLIGNK.A                                             | 2680.01292 | 2 | 9.42E-05 | 0.83  | 2.86   | -     | 667.9    |
| PM-9, 6187                  | R.NWMSQLQANAYCENPDIVLIGNK.A                                             | 2680.01292 | 2 | 2.80E-08 | 0.97  | 5.79   | -     | 1071.6   |
| PM-9, 4268 - 4323           | K.YGIPYFETSAAATGQNVK.E                                                  | 1976.13177 | 2 | 3.92E-06 | 0.94  | 4.18   | -     | 1054.1   |
| gi 28626504 ref NP_113659.3 | UNC-112 related protein 2 [Homo sapiens]                                |            |   | 2.95E-08 | 12.87 | 160.32 | 37.40 | 75429.7  |
| PM-8, 2868                  | K.AGDALWLR.F                                                            | 902.03223  | 2 | 7.28E-05 | 0.92  | 3.82   | -     | 1270.7   |
| PM-5, 6246                  | R.ARGEELDEDLFLQLTGGHEAF                                                 | 2348.51032 | 2 | 1.07E-06 | 0.73  | 2.60   | -     | 621.5    |
| PM-1, 6455 - 6456           | R.ASFSQLFQAVAAICR.L                                                     | 1767.04487 | 2 | 2.95E-08 | 0.95  | 5.09   | -     | 921.3    |
| PM-8, 6152 - 6162           | R.ASFSQLFQAVAAICR.L                                                     | 1767.04487 | 2 | 4.21E-06 | 0.94  | 4.26   | -     | 969.0    |
| PM-3, 6267                  | R.ASFSQLFQAVAAICR.L                                                     | 1767.04487 | 2 | 2.32E-04 | 0.84  | 3.38   | -     | 591.2    |
| PM-5, 6170 - 6180           | R.ASFSQLFQAVAAICR.L                                                     | 1767.04487 | 2 | 4.60E-06 | 0.96  | 4.91   | -     | 1050.9   |
| PM-2, 6313                  | R.ASFSQLFQAVAAICR.L                                                     | 1767.04487 | 2 |          |       |        |       |          |

|                                                                                                              |                                            |            |   |          |      |        |       |          |
|--------------------------------------------------------------------------------------------------------------|--------------------------------------------|------------|---|----------|------|--------|-------|----------|
| PM-8, 2678 - 2680                                                                                            | K.GCEVVPDYNVSGQK.F                         | 1488.64855 | 1 | 6.24E-04 | 0.81 | 3.17   | -     | 828.1    |
| PM-10, 2793                                                                                                  | K.GCEVVPDYNVSGQK.F                         | 1488.64855 | 1 | 2.67E-05 | 0.90 | 4.25   | -     | 755.5    |
| PM-10, 2773                                                                                                  | K.GCEVVPDYNVSGQK.F                         | 1488.64855 | 1 | 2.05E-04 | 0.89 | 3.03   | -     | 1136.3   |
| PM-2, 2730                                                                                                   | K.GCEVVPDYNVSGQK.F                         | 1488.64855 | 1 | 2.03E-04 | 0.87 | 3.19   | -     | 917.9    |
| PM-5, 2742                                                                                                   | K.GCEVVPDYNVSGQK.F                         | 1488.64855 | 1 | 7.88E-06 | 0.85 | 3.84   | -     | 651.5    |
| PM-5, 6293                                                                                                   | R.GEELDELFLQLTGGHEAF                       | 2121.24574 | 2 | 1.77E-04 | 0.78 | 3.38   | -     | 946.1    |
| PM-5, 2485                                                                                                   | R.HPEELSLLR.A                              | 1094.24601 | 1 | 9.43E-05 | 0.12 | 1.85   | -     | 143.2    |
| PM-5, 4396 - 4456                                                                                            | R.ILEAHQNVQLSLAEALR.F                      | 2105.38372 | 2 | 4.05E-04 | 0.92 | 4.19   | -     | 890.7    |
| PM-5, 4284 - 4341                                                                                            | R.ILEAHQNVQLSLAEALR.F                      | 2105.38372 | 2 | 5.18E-07 | 0.98 | 6.32   | -     | 2252.8   |
| PM-2, 4310                                                                                                   | R.ILEAHQNVQLSLAEALR.F                      | 2105.38372 | 2 | 1.28E-04 | 0.98 | 5.39   | -     | 2818.9   |
| PM-3, 4224 - 4283                                                                                            | R.ILEAHQNVQLSLAEALR.F                      | 2105.38372 | 2 | 5.01E-06 | 0.81 | 3.67   | -     | 583.4    |
| PM-11, 4416 - 4471                                                                                           | R.ILEAHQNVQLSLAEALR.F                      | 2105.38372 | 2 | 3.89E-04 | 0.72 | 2.98   | -     | 710.3    |
| PM-1, 6495                                                                                                   | K.LEGSAPTDVLDLSTIPELK.D                    | 2100.35256 | 2 | 1.18E-04 | 0.86 | 3.96   | -     | 445.2    |
| PM-5, 3817 - 3884                                                                                            | K.SQDEAPGDPIQLNLK.G                        | 1753.89174 | 2 | 7.70E-04 | 0.78 | 3.13   | -     | 435.3    |
| PM-5, 3922                                                                                                   | R.TSGSGPGNHPHGPDAEGLNPGYLVAPR.F            | 2783.95312 | 2 | 1.04E-04 | 0.76 | 3.49   | -     | 390.4    |
| PM-5, 3622 - 3682                                                                                            | R.TSGSGPGNHPHGPDAEGLNPGYLVAPR.F            | 2783.95312 | 2 | 2.87E-04 | 0.93 | 4.77   | -     | 726.7    |
| PM-5, 3782                                                                                                   | R.TSGSGPGNHPHGPDAEGLNPGYLVAPR.F            | 2783.95312 | 2 | 3.57E-04 | 0.84 | 3.58   | -     | 671.6    |
| PM-10, 3761                                                                                                  | R.TSGSGPGNHPHGPDAEGLNPGYLVAPR.F            | 2783.95312 | 2 | 1.69E-04 | 0.90 | 4.34   | -     | 544.3    |
| PM-1, 4057                                                                                                   | R.TSGSGPGNHPHGPDAEGLNPGYLVAPR.F            | 2783.95312 | 2 | 7.85E-04 | 0.90 | 4.26   | -     | 643.5    |
| PM-4, 3441 - 3466                                                                                            | R.TSGSGPGNHPHGPDAEGLNPGYLVAPR.F            | 2783.95312 | 2 | 3.39E-04 | 0.85 | 4.13   | -     | 487.0    |
| PM-2, 3610                                                                                                   | R.TSGSGPGNHPHGPDAEGLNPGYLVAPR.F            | 2783.95312 | 2 | 3.62E-04 | 0.92 | 4.40   | -     | 645.9    |
| PM-3, 3559                                                                                                   | R.TSGSGPGNHPHGPDAEGLNPGYLVAPR.F            | 2783.95312 | 2 | 3.96E-05 | 0.92 | 4.94   | -     | 661.4    |
| PM-5, 6301 - 6377                                                                                            | R.TM*ADSSYTSVQQAIFLFLSLQR.T                | 2448.73471 | 3 | 8.17E-04 | 0.86 | 4.02   | -     | 1037.8   |
| PM-1, 4133                                                                                                   | R.VFVGEEDPEAESVTLR.V                       | 1777.91007 | 2 | 6.95E-05 | 0.91 | 3.73   | -     | 1166.0   |
| PM-6, 3552 - 3622                                                                                            | R.VFVGEEDPEAESVTLR.V                       | 1777.91007 | 2 | 2.00E-05 | 0.67 | 2.56   | -     | 659.9    |
| PM-10, 3871 - 3928                                                                                           | R.VFVGEEDPEAESVTLR.V                       | 1777.91007 | 2 | 7.97E-05 | 0.88 | 3.49   | -     | 1101.2   |
| PM-7, 3658                                                                                                   | R.VFVGEEDPEAESVTLR.V                       | 1777.91007 | 2 | 1.35E-05 | 0.84 | 3.32   | -     | 904.7    |
| PM-3, 3756 - 3779                                                                                            | R.VFVGEEDPEAESVTLR.V                       | 1777.91007 | 2 | 4.86E-05 | 0.89 | 3.38   | -     | 1295.1   |
| PM-2, 3797 - 3798                                                                                            | R.VFVGEEDPEAESVTLR.V                       | 1777.91007 | 2 | 1.66E-06 | 0.95 | 4.62   | -     | 1387.5   |
| PM-5, 3780 - 3844                                                                                            | R.VFVGEEDPEAESVTLR.V                       | 1777.91007 | 2 | 7.63E-07 | 0.92 | 4.43   | -     | 1025.0   |
| PM-8, 2423 - 2478                                                                                            | R.VTGESHIGGVLLK.I                          | 1310.52448 | 2 | 1.06E-06 | 0.94 | 4.37   | -     | 1360.2   |
| PM-2, 2426                                                                                                   | R.VTGESHIGGVLLK.I                          | 1310.52448 | 2 | 4.20E-04 | 0.72 | 2.92   | -     | 428.6    |
| PM-7, 2209                                                                                                   | R.VTGESHIGGVLLK.I                          | 1310.52448 | 2 | 3.08E-04 | 0.90 | 3.18   | -     | 1348.8   |
| PM-6, 2278 - 2294                                                                                            | R.VTGESHIGGVLLK.I                          | 1310.52448 | 2 | 8.33E-06 | 0.89 | 3.29   | -     | 1070.1   |
| PM-5, 2530                                                                                                   | R.VTGESHIGGVLLK.I                          | 1310.52448 | 2 | 9.46E-05 | 0.95 | 4.27   | -     | 1682.7   |
| PM-5, 2461 - 2534                                                                                            | R.VTGESHIGGVLLK.I                          | 1310.52448 | 1 | 4.96E-04 | 0.51 | 2.42   | -     | 614.9    |
| PM-8, 2487                                                                                                   | R.VTGESHIGGVLLK.I                          | 1310.52448 | 1 | 3.72E-05 | 0.71 | 3.00   | -     | 723.6    |
| PM-5, 4598                                                                                                   | K.VVLVAGVAPALFR.G                          | 1270.54832 | 1 | 4.82E-04 | 0.74 | 2.98   | -     | 258.7    |
| gj 4507357 ref NP_003555.1 transgelin 2; SM22-alpha homolog [Homo sapiens]                                   |                                            |            |   | 3.18E-08 | 1.49 | 20.24  | 20.10 | 22391.3  |
| PM-10, 6277                                                                                                  | K.DGTVLCELINALYPEGQAPVKK.I                 | 2416.77877 | 2 | 2.37E-05 | 0.53 | 2.57   | -     | 412.8    |
| PM-10, 6251                                                                                                  | R.YGINTTDFIQTVLDLWEGK.N                    | 2101.30080 | 2 | 3.18E-08 | 0.95 | 4.88   | -     | 799.4    |
| gj 4507879 ref NP_003365.1 voltage-dependent anion channel 1 [Homo sapiens]                                  |                                            |            |   | 3.22E-08 | 1.83 | 20.22  | 13.10 | 30772.3  |
| PM-8, 3928                                                                                                   | K.KLETAVNLAWTAGNSNTR.F                     | 1947.14157 | 2 | 1.74E-05 | 0.93 | 4.32   | -     | 932.3    |
| PM-8, 2628                                                                                                   | K.SENGLFTSSGSAINTETTK.V                    | 1960.98754 | 2 | 3.22E-08 | 0.90 | 3.93   | -     | 694.5    |
| gj 4502285 ref NP_001672.1 ATPase, Ca++ transporting, cardiac muscle, slow twitch 2 isoform 2; ATP           |                                            |            |   | 3.41E-08 | 1.82 | 20.24  | 3.30  | 109690.3 |
| PM-4, 4345 - 4422                                                                                            | R.SLPSVETLGGCTSVICSDK.T                    | 1954.21236 | 2 | 3.41E-08 | 0.89 | 3.99   | -     | 592.5    |
| PM-2, 4502                                                                                                   | R.SLPSVETLGGCTSVICSDK.T                    | 1954.21236 | 2 | 3.30E-04 | 0.60 | 2.81   | -     | 253.4    |
| PM-3, 4423 - 4431                                                                                            | R.SLPSVETLGGCTSVICSDK.T                    | 1954.21236 | 2 | 2.78E-04 | 0.78 | 3.38   | -     | 418.4    |
| PM-1, 4771 - 4833                                                                                            | R.SLPSVETLGGCTSVICSDK.T                    | 1954.21236 | 2 | 1.95E-05 | 0.89 | 3.64   | -     | 690.4    |
| PM-4, 4053 - 4112                                                                                            | K.VGEATETALTCLVEK.M                        | 1621.83478 | 2 | 2.41E-06 | 0.93 | 4.50   | -     | 823.3    |
| PM-2, 4199 - 4274                                                                                            | K.VGEATETALTCLVEK.M                        | 1621.83478 | 2 | 5.53E-06 | 0.94 | 4.75   | -     | 1064.7   |
| gj 4504085 ref NP_000399.1 glycerol-3-phosphate dehydrogenase 2 (mitochondrial) [Homo sapiens] [MA]          |                                            |            |   | 3.55E-08 | 4.34 | 60.23  | 12.00 | 80814.1  |
| PM-5, 2998                                                                                                   | K.LVGAIVYDGGHNDAR.M                        | 1791.94490 | 2 | 6.57E-05 | 0.73 | 3.31   | -     | 490.9    |
| PM-5, 5574 - 5649                                                                                            | R.LVQDYGLESEVAHQHAAATYGDK.A                | 2408.60567 | 2 | 3.55E-08 | 0.96 | 4.54   | -     | 1516.9   |
| PM-5, 3566                                                                                                   | K.LYDLVAGSNCLK.S                           | 1353.56937 | 1 | 9.51E-06 | 0.52 | 2.86   | -     | 396.5    |
| PM-5, 4158                                                                                                   | R.SEISLLPSDIDR.Y                           | 1345.48086 | 1 | 3.38E-07 | 0.51 | 3.00   | -     | 348.5    |
| PM-5, 6305                                                                                                   | R.VLESINQMDENTLHEILNEVDLNK.N               | 2911.23474 | 3 | 1.47E-06 | 0.91 | 4.39   | -     | 722.5    |
| PM-5, 6284                                                                                                   | R.VLESINQMD*ENTLHEILNEVDLNK.N              | 2927.23414 | 3 | 2.39E-05 | 0.70 | 3.94   | -     | 331.0    |
| gj 11761631 ref NP_005132.1 fibrinogen, beta chain preproprotein [Homo sapiens]                              |                                            |            |   | 4.40E-08 | 3.35 | 40.20  | 11.40 | 55901.8  |
| PM-6, 2334 - 2336                                                                                            | K.KREEAPSLRPAPPISGGGYR.A                   | 2236.51908 | 3 | 1.08E-04 | 0.90 | 3.90   | -     | 1102.4   |
| PM-6, 5996 - 6063                                                                                            | R.MGPTTELLIEMEDWKGDK.V                     | 1993.29069 | 2 | 3.90E-05 | 0.76 | 2.69   | -     | 678.8    |
| PM-6, 3872 - 3932                                                                                            | R.VYCDMNTENGWTVIQNR.Q                      | 2158.36073 | 2 | 4.40E-08 | 0.91 | 4.01   | -     | 788.9    |
| PM-6, 3408 - 3474                                                                                            | R.VYCDM*NTENGWTVIQNR.Q                     | 2174.36013 | 2 | 1.18E-04 | 0.78 | 3.44   | -     | 662.5    |
| gj 4507651 ref NP_003281.1 tropomyosin 4 [Homo sapiens]                                                      |                                            |            |   | 4.47E-08 | 0.95 | 10.22  | 6.00  | 28521.6  |
| PM-8, 2139                                                                                                   | R.KIQALQQQAEDADR.A                         | 1743.85695 | 3 | 4.47E-08 | 0.95 | 4.33   | -     | 1684.7   |
| gj 27485844 ref XP_113743.3 similar to chromosome 11 open reading frame 25 [Homo sapiens]                    |                                            |            |   | 5.14E-08 | 0.83 | 10.21  | 2.50  | 102449.4 |
| PM-3, 6359 - 6360                                                                                            | K.VLSVDSIHKPEQEFFTAPFEK.N                  | 2554.87541 | 2 | 5.14E-08 | 0.83 | 4.13   | -     | 289.5    |
| gj 4504745 ref NP_000410.1 integrin alpha 2b precursor [Homo sapiens]                                        |                                            |            |   | 6.37E-08 | 8.39 | 100.28 | 17.20 | 113374.2 |
| PM-3, 3887                                                                                                   | R.DGYNDAVAAAPYGGPSGR.G                     | 1780.87574 | 2 | 6.53E-05 | 0.73 | 2.86   | -     | 582.5    |
| PM-3, 3631 - 3675                                                                                            | R.DGYNDAVAAAPYGGPSGR.G                     | 1780.87574 | 2 | 6.24E-05 | 0.54 | 2.97   | -     | 537.7    |
| PM-3, 3785 - 3843                                                                                            | R.DGYNDAVAAAPYGGPSGR.G                     | 1780.87574 | 2 | 5.30E-05 | 0.76 | 3.85   | -     | 396.7    |
| PM-3, 4169                                                                                                   | R.FGSAIAPLDGLDR.D                          | 1332.48700 | 1 | 4.84E-06 | 0.59 | 2.82   | -     | 394.1    |
| PM-3, 6040 - 6108                                                                                            | R.GAVDIDDNGYPLDIVGAYGANQVAVYR.A            | 2827.05458 | 2 | 6.98E-07 | 0.92 | 4.82   | -     | 466.6    |
| PM-3, 6575 - 6632                                                                                            | R.GAVDIDDNGYPLDIVGAYGANQVAVYR.A            | 2827.05458 | 2 | 7.06E-06 | 0.94 | 5.39   | -     | 582.7    |
| PM-9, 4671 - 4727                                                                                            | R.GEAQVVTQLLR.A                            | 1301.47614 | 2 | 3.23E-06 | 0.87 | 3.41   | -     | 773.4    |
| PM-10, 6139                                                                                                  | R.LQDPVLVSCDSAPCTVQCDLQEMAR.G              | 2993.40704 | 2 | 7.72E-05 | 0.91 | 4.46   | -     | 557.1    |
| PM-3, 5911 - 5979                                                                                            | R.SRPSQVLDSPPFTGSAGFSLR.G                  | 2354.60606 | 2 | 7.72E-07 | 0.86 | 3.87   | -     | 461.7    |
| PM-3, 5793 - 5855                                                                                            | R.SRPSQVLDSPPFTGSAGFSLR.G                  | 2354.60606 | 2 | 6.37E-08 | 0.92 | 4.57   | -     | 576.1    |
| PM-3, 3075 - 3152                                                                                            | K.TEEAEKTPVGSFCFLAQPSGRR.R                 | 2294.48422 | 2 | 3.51E-05 | 0.80 | 3.87   | -     | 442.6    |
| PM-3, 2713 - 2715                                                                                            | K.TEEAEKTPVGSFCFLAQPSGRR.R                 | 2450.67057 | 3 | 1.62E-05 | 0.86 | 4.34   | -     | 536.2    |
| PM-3, 5048 - 5115                                                                                            | R.TLGSQEEETGGVFLCPWR.A                     | 2035.26884 | 2 | 3.45E-05 | 0.80 | 3.15   | -     | 799.0    |
| PM-3, 4259 - 4319                                                                                            | K.TPVSCFNQICVGTGHNIPQK.L                   | 2460.84162 | 3 | 3.52E-07 | 0.95 | 5.60   | -     | 1074.6   |
| gj 29568111 ref NP_006088.2 myosin, light polypeptide 9, regulatory; myosin regulatory light chain           |                                            |            |   | 7.05E-08 | 0.65 | 10.13  | 6.40  | 19827.1  |
| PM-10, 3296                                                                                                  | R.FTDEEVDEMYR.E                            | 1434.51009 | 1 | 7.05E-08 | 0.65 | 2.61   | -     | 563.1    |
| PM-10, 3293                                                                                                  | R.FTDEEVDEMYR.E                            | 1434.51009 | 1 | 7.22E-04 | 0.42 | 2.06   | -     | 510.1    |
| gj 14149734 ref NP_065174.1 coronin, actin binding protein, 1B [Homo sapiens]                                |                                            |            |   | 7.43E-08 | 1.80 | 20.20  | 13.50 | 54234.4  |
| PM-5, 6252 - 6253                                                                                            | R.KSDFQDDLYDPTAGPEAAEAEEVWSGR.D            | 3211.39431 | 3 | 1.40E-04 | 0.87 | 4.09   | -     | 933.1    |
| PM-5, 3737 - 3750                                                                                            | R.NVLSDSRPAMAPGSSHLGAPASTTTAADATPSGLAR.A   | 3524.82150 | 3 | 7.43E-08 | 0.93 | 3.84   | -     | 1777.2   |
| gj 5453704 ref NP_006398.1 cytoskeleton related vitamin A responsive protein; glutamate transport            |                                            |            |   | 1.09E-07 | 1.85 | 20.35  | 16.00 | 21614.6  |
| PM-10, 4784 - 4791                                                                                           | R.AWDDFFPGSDR.F                            | 1313.35597 | 2 | 1.98E-06 | 0.87 | 3.12   | -     | 864.3    |
| PM-10, 6235 - 6236                                                                                           | R.TPMGIVLDALEQQEEGINR.L                    | 2114.36606 | 2 | 1.09E-07 | 0.98 | 7.00   | -     | 2312.5   |
| gj 4507841 ref NP_003356.1 ubiquinol-cytochrome c reductase core protein I [Homo sapiens]                    |                                            |            |   | 1.37E-07 | 0.84 | 10.16  | 4.80  | 52618.5  |
| PM-6, 5183                                                                                                   | K.YIYDQCPAVAGYGPPIQLPDYNR.I                | 2703.96630 | 2 | 1.37E-07 | 0.84 | 3.12   | -     | 665.2    |
| gj 30148492 ref XP_293610.2 similar to Heat shock cognate 71 kDa protein [Homo sapiens]                      |                                            |            |   | 1.39E-07 | 0.88 | 10.19  | 2.60  | 72113.4  |
| PM-5, 4038 - 4112                                                                                            | R.IINEPTAAAIYGLDKK.V                       | 1789.06550 | 2 | 1.39E-07 | 0.88 | 3.81   | -     | 612.0    |
| gj 11321601 ref NP_002618.1 phosphofructokinase, platelet; Phosphofructokinase, platelet type [Homo sapiens] |                                            |            |   | 1.62E-07 | 0.83 | 10.20  | 2.20  | 85595.6  |
| PM-4, 5169                                                                                                   | R.IIEVDAIMTTAQSHQR.T                       | 1913.18853 | 2 | 1.62E-07 | 0.83 | 3.16   | -     | 834.3    |
| gj 5031571 ref NP_005713.1 actin-related protein 2; ARP2 (actin-related protein 2, yeast) homolog            |                                            |            |   | 1.85E-07 | 0.95 | 10.19  | 4.30  | 44760.5  |
| PM-7, 3476 - 3486                                                                                            | K.HIVLSGGSTMYPGLPSR.L                      | 1773.04967 | 2 | 1.85E-07 | 0.95 | 3.72   | -     | 1330.6   |
| gj 4504165 ref NP_000168.1 gelsolin (amyloidosis, Finnish type); Gelsolin [Homo sapiens]                     |                                            |            |   | 1.87E-07 | 5.10 | 70.29  | 17.50 | 85696.9  |
| PM-4, 3436 - 3541                                                                                            | K.AGALNSDNDAFLVK.T                         | 1320.47622 | 1 | 1.87E-07 | 0.52 | 2.32   | -     | 487.3    |
| PM-4, 5537 - 5596                                                                                            | R.AQPVQVAEGSEPDGFWEALGGK.A                 | 2273.44345 | 2 | 4.08E-07 | 0.89 | 4.24   | -     | 734.8    |
| PM-4, 1897                                                                                                   | K.HVVPNEVVQR.L                             | 1276.46981 | 1 | 2.95E-04 | 0.50 | 2.94   | -     | 247.1    |
| PM-4, 5349                                                                                                   | K.NWRDPDQTDGLGLSYLSSHIANVER.V              | 2845.03323 | 2 | 1.51E-04 | 0.75 | 3.50   | -     | 270.8    |
| PM-4, 4584 - 4649                                                                                            | R.VHVSEEGTEPEAMLQVLGPK.P                   | 2151.42630 | 2 | 3.62E-06 | 0.96 | 4.87   | -     | 1054.4   |
| PM-4, 4716                                                                                                   | R.VHVSEEGTEPEAMLQVLGPK.PALPAGTETAKEDAANR.K | 3960.33442 | 3 | 4.96E-05 | 0.50 | 3.05   | -     | 380.0    |
| PM-4, 3554 - 3634                                                                                            | R.VPDAALHTSTAMAAHQMGDDDTGGQK.Q             | 2875.10141 | 3 | 7.93E-04 | 0.97 | 5.88   | -     | 1776.9   |









|                             |                                                                         |            |   |          |      |       |       |          |
|-----------------------------|-------------------------------------------------------------------------|------------|---|----------|------|-------|-------|----------|
| PM-3, 6423                  | -CPCSTKSNAEQPFELKQVK.G                                                  | 2252.55686 | 2 | 9.13E-04 | 0.47 | 3.03  | -     | 525.6    |
| gi 5902090 ref NP_008862.1  | solute carrier family 2 (facilitated glucose transporter), member 3; GL |            |   | 1.07E-04 | 0.82 | 10.17 | 0.00  | 53924.0  |
| PM-7, 4973                  | R.LWGTQDVSDIQIEMKDESAR.M                                                | 2337.50934 | 2 | 1.07E-04 | 0.82 | 2.77  | -     | 765.5    |
| PM-1, 5569                  | R.LWGTQDVSDIQIEMKDESAR.M                                                | 2337.50934 | 2 | 2.74E-04 | 0.74 | 2.57  | -     | 954.1    |
| gi 24497612 ref NP_116262.2 | nm23-phosphorylated unknown substrate; SH3 domain-containing 70 kDa pr  |            |   | 1.10E-04 | 1.64 | 20.20 | 6.00  | 72695.6  |
| PM-5, 4149 - 4164           | R.EYVLYRPTGPLAQK.L                                                      | 1749.04621 | 2 | 1.10E-04 | 0.83 | 2.87  | -     | 916.5    |
| PM-5, 6306 - 6309           | R.SVOAACDWLFSHVGDPLDPLPR.E                                              | 2744.03366 | 2 | 6.23E-04 | 0.81 | 3.93  | -     | 332.2    |
| gi 4507949 ref NP_003395.1  | tyrosine 3-monooxygenase/tryptophan 5-monooxygenase activation protein, |            |   | 1.14E-04 | 0.84 | 10.16 | 4.90  | 28082.2  |
| PM-9, 2611                  | K.YLIPNATQPESEK.V                                                       | 1361.52512 | 1 | 1.14E-04 | 0.84 | 3.23  | -     | 818.3    |
| gi 5032007 ref NP_005850.1  | purine-rich element binding protein A; purine-rich single-stranded DNA- |            |   | 1.18E-04 | 0.82 | 10.18 | 0.00  | 34910.5  |
| PM-8, 4546                  | K.LIDDYGVVEEPAELPEGSLTVDNKR.F                                           | 2891.09052 | 3 | 1.18E-04 | 0.82 | 3.59  | -     | 757.4    |
| gi 6005846 ref NP_009215.1  | PTK9L protein tyrosine kinase 9-like (A6-related protein); protein tyro |            |   | 1.20E-04 | 0.46 | 10.13 | 5.40  | 39547.7  |
| PM-9, 3992                  | R.ETIELVHTEPTDVAQLPSR.V                                                 | 2136.34822 | 2 | 1.20E-04 | 0.46 | 2.55  | -     | 325.8    |
| gi 5031611 ref NP_005859.1  | BET1 homolog; Golgi vesicular membrane trafficking protein p18; Bet1 p  |            |   | 1.20E-04 | 0.92 | 10.20 | 15.30 | 13289.4  |
| PM-11, 4768                 | K.LLAEM*DSQFDSTTGFLGK.T                                                 | 1977.18145 | 2 | 1.20E-04 | 0.92 | 4.01  | -     | 919.1    |
| gi 21735621 ref NP_005909.2 | mitochondrial malate dehydrogenase precursor [Homo sapiens]             |            |   | 1.22E-04 | 0.93 | 10.18 | 5.00  | 35503.0  |
| PM-8, 5188                  | K.SQETECTYFSTPLLLGK.K                                                   | 1975.20848 | 2 | 1.22E-04 | 0.93 | 3.70  | -     | 1059.2   |
| gi 4502107 ref NP_001145.1  | annexin V; endonexin II; anchorin CII; lipocortin V; placental anticoag |            |   | 1.32E-04 | 0.65 | 10.15 | 7.80  | 35936.5  |
| PM-8, 5192                  | K.QVVEEYEGSSLEDDVVDGTSGYQR.M                                            | 2889.93166 | 2 | 1.32E-04 | 0.65 | 3.08  | -     | 444.1    |
| gi 10835220 ref NP_004311.1 | ATPase, Ca++ transporting, fast twitch 1 isoform b; sarcoplasmic/endop  |            |   | 1.36E-04 | 0.98 | 10.26 | 2.10  | 109282.7 |
| PM-4, 6152 - 6156           | R.DIVPGDIVEVAVGDKVPADIR.I                                               | 2178.47138 | 2 | 1.36E-04 | 0.98 | 5.20  | -     | 1857.6   |
| gi 17986280 ref NP_524147.1 | smooth muscle and non-muscle myosin alkali light chain isoform 2 [Homo  |            |   | 1.48E-04 | 1.47 | 20.20 | 23.30 | 12969.7  |
| PM-11, 6371 - 6429          | K.M*TEEEVEMLVAGHEDSNGGCINYEELVR.M                                       | 3171.44016 | 3 | 9.10E-04 | 0.82 | 3.51  | -     | 1015.4   |
| PM-11, 5695 - 5739          | K.M*TEEEVEM*LVAGHEDSNGGCINYEELVR.M                                      | 3187.43956 | 3 | 1.48E-04 | 0.64 | 3.07  | -     | 495.7    |
| gi 7661746 ref NP_054760.1  | signal peptidase 12kDa [Homo sapiens]                                   |            |   | 1.53E-04 | 0.82 | 10.17 | 18.70 | 10567.3  |
| PM-11, 2340                 | K.VLVPQESSTDDKPKGR.K                                                    | 1973.13265 | 2 | 1.53E-04 | 0.82 | 3.41  | -     | 568.5    |
| gi 11386193 ref NP_008921.1 | WAS protein family, member 2; suppressor of cyclic-AMP receptor (WASP-  |            |   | 1.59E-04 | 0.80 | 10.18 | 3.80  | 54283.7  |
| PM-9, 3753 - 3757           | K.VTQLDPKEEVSQGLGINTR.K                                                 | 2157.36743 | 2 | 1.59E-04 | 0.80 | 3.50  | -     | 623.2    |
| gi 4505879 ref NP_002655.1  | pleckstrin; p47 [Homo sapiens]                                          |            |   | 1.60E-04 | 0.94 | 10.29 | 6.90  | 40082.5  |
| PM-7, 5220 - 5224           | R.EDPAYLHYDPAGAEPLGAIHLR.G                                              | 2684.89982 | 3 | 1.60E-04 | 0.94 | 4.79  | -     | 1297.4   |
| gi 20472432 ref XP_166699.1 | similar to bicaudal-C [Homo sapiens]                                    |            |   | 1.67E-04 | 0.64 | 10.10 | 9.20  | 13337.0  |
| PM-4, 4822                  | R.KMLLAISELNK.N                                                         | 1260.57201 | 1 | 1.67E-04 | 0.64 | 1.99  | -     | 1121.3   |
| gi 4503545 ref NP_001961.1  | eukaryotic translation initiation factor 5A; eIF5A1; eIF5A [Homo sapien |            |   | 1.68E-04 | 0.79 | 10.18 | 11.00 | 16832.2  |
| PM-10, 3885                 | R.EDLRPEGLDLGKIEQK.Y                                                    | 1970.17021 | 2 | 1.68E-04 | 0.79 | 3.68  | -     | 391.0    |
| gi 28395033 ref NP_786886.1 | ras homolog gene family, member C; Aplysia RAS-related homolog 9 (onco  |            |   | 1.80E-04 | 0.40 | 10.15 | 12.40 | 22006.2  |
| PM-9, 6343                  | K.DQFPEVYVTFENYADIEVDGK.Q                                               | 2789.04149 | 2 | 1.80E-04 | 0.40 | 3.02  | -     | 178.4    |
| gi 21614520 ref NP_000393.2 | glucose-6-phosphate dehydrogenase [Homo sapiens]                        |            |   | 1.91E-04 | 0.94 | 10.22 | 3.10  | 59257.4  |
| PM-6, 3747                  | R.LQFHDVADGIFHQCK.R                                                     | 1944.16262 | 2 | 1.91E-04 | 0.94 | 4.46  | -     | 976.1    |
| gi 5803201 ref NP_006818.1  | transmembrane trafficking protein [Homo sapiens]                        |            |   | 1.95E-04 | 0.92 | 10.17 | 5.50  | 24975.8  |
| PM-10, 2215 - 2277          | K.ITDSAGHILYSK.E                                                        | 1305.46156 | 2 | 1.95E-04 | 0.92 | 3.36  | -     | 1263.2   |
| gi 21361478 ref NP_059444.2 | septin 6 isoform B; septin 2 [Homo sapiens]                             |            |   | 2.04E-04 | 0.83 | 10.17 | 4.60  | 49716.3  |
| PM-6, 2696                  | K.TAAELLQSQSQAGGSQTLK.R                                                 | 1976.13485 | 2 | 2.04E-04 | 0.83 | 3.35  | -     | 959.6    |
| gi 8393638 ref NP_058642.1  | F11 receptor isoform a precursor; platelet F11 receptor; platelet adhes |            |   | 2.31E-04 | 0.82 | 10.17 | 7.70  | 32582.9  |
| PM-8, 4792 - 4859           | K.LLIVLPPSKPTVINIPSSATIGNR.A                                            | 2374.80814 | 2 | 2.31E-04 | 0.82 | 3.48  | -     | 482.3    |
| gi 22042381 ref XP_065237.3 | similar to FKSG30 [Homo sapiens]                                        |            |   | 2.35E-04 | 0.26 | 10.18 | 4.80  | 42016.0  |
| PM-7, 3352 - 3426           | R.VAPEEHILLTEAPLNPK.A                                                   | 1969.27019 | 2 | 2.35E-04 | 0.26 | 2.57  | -     | 173.5    |
| gi 29729345 ref XP_290995.1 | similar to speckle-type POZ protein [Homo sapiens]                      |            |   | 2.35E-04 | 0.72 | 10.19 | 10.90 | 18703.4  |
| PM-3, 5776 - 5836           | K.NRVEINDLPEVFKEMMR.F                                                   | 2252.55733 | 2 | 2.35E-04 | 0.72 | 3.83  | -     | 763.0    |
| gi 8922673 ref NP_060692.1  | parvin, alpha; alpha-parvin; actopaxin [Homo sapiens]                   |            |   | 2.48E-04 | 0.86 | 10.16 | 3.50  | 42243.4  |
| PM-8, 4372                  | R.DAFDTLFDHAPDK.L                                                       | 1492.57096 | 1 | 2.48E-04 | 0.86 | 3.21  | -     | 762.8    |
| gi 18640750 ref NP_570138.1 | regulator of G-protein signalling 18; regulator of G-protein signalling |            |   | 2.50E-04 | 0.73 | 10.16 | 8.90  | 27580.0  |
| PM-9, 4063                  | K.EVITNSIQPTLHSDFAAQR.V                                                 | 2316.51300 | 2 | 2.50E-04 | 0.73 | 2.93  | -     | 425.8    |
| gi 4757812 ref NP_004880.1  | ATP synthase, H+ transporting, mitochondrial F0 complex, subunit f, iso |            |   | 2.54E-04 | 0.62 | 10.13 | 11.70 | 10917.8  |
| PM-11, 6119                 | K.LGELPSWILMR.D                                                         | 1315.60936 | 2 | 2.54E-04 | 0.62 | 2.52  | -     | 547.0    |
| gi 21361456 ref NP_055425.2 | alpha glucosidase II alpha subunit; likely ortholog of mouse G2an alph  |            |   | 2.58E-04 | 0.58 | 10.14 | 1.80  | 109437.2 |
| PM-4, 3398                  | K.MMDYLQSGGETPQTDVR.W                                                   | 1929.12196 | 2 | 2.58E-04 | 0.58 | 2.79  | -     | 501.9    |
| gi 4507231 ref NP_003134.1  | single-stranded DNA binding protein; single-stranded DNA-binding protei |            |   | 2.66E-04 | 0.47 | 10.10 | 5.40  | 17259.5  |
| PM-11, 2215                 | R.DVAYQYVK.K                                                            | 986.10277  | 1 | 2.66E-04 | 0.47 | 2.07  | -     | 646.1    |
| gi 8923579 ref NP_060377.1  | hypothetical protein FLJ20625 [Homo sapiens]                            |            |   | 2.70E-04 | 0.70 | 10.19 | 18.60 | 17744.7  |
| PM-10, 6176 - 6177          | K.LPPLSLTSQPHQLVASEPIPFSDLQVSR.I                                        | 3283.72259 | 3 | 2.70E-04 | 0.70 | 3.72  | -     | 383.7    |
| gi 30150532 ref XP_291282.2 | similar to proliferation related acidic leucine rich protein PAL31 [Ho  |            |   | 2.71E-04 | 0.24 | 10.14 | 3.80  | 48984.1  |
| PM-4, 5372 - 5432           | K.DAREEDGVDITIEDLTRA                                                    | 1963.99143 | 2 | 2.71E-04 | 0.24 | 2.72  | -     | 422.8    |
| gi 29734623 ref XP_299768.1 | hypothetical protein XP_299768 [Homo sapiens]                           |            |   | 2.72E-04 | 0.33 | 10.12 | 7.50  | 14905.7  |
| PM-8, 3318 - 3319           | K.RMVPVKEIDR.L                                                          | 1243.50477 | 1 | 2.72E-04 | 0.33 | 2.46  | -     | 446.2    |
| gi 24797093 ref NP_005383.2 | PHD finger protein 2 isoform a [Homo sapiens]                           |            |   | 2.84E-04 | 0.48 | 10.16 | 3.40  | 121231.7 |
| PM-2, 6427                  | K.KDGLGLAVPAPTFYVSDVENYVGPERSVDVDTVKQK.D                                | 3996.42799 | 3 | 2.84E-04 | 0.48 | 3.18  | -     | 314.5    |
| gi 4885611 ref NP_005461.1  | spectrin SH3 domain binding protein 1; eps8 binding protein; interactor |            |   | 3.20E-04 | 0.62 | 10.14 | 2.20  | 55156.6  |
| PM-10, 3445 - 3463          | R.LALIESYQNLTR.V                                                        | 1308.46544 | 2 | 3.20E-04 | 0.62 | 2.74  | -     | 407.3    |
| gi 13637631 ref XP_016625.1 | similar to voltage-dependent anion channel isoform 2 [Homo sapiens] [M  |            |   | 3.38E-04 | 0.34 | 10.15 | 3.80  | 31479.2  |
| PM-8, 4172                  | K.WCEYGLTFTEK.W                                                         | 1434.59781 | 1 | 3.38E-04 | 0.34 | 2.65  | -     | 337.6    |
| gi 6912638 ref NP_036557.1  | ras suppressor protein 1 [Homo sapiens]                                 |            |   | 3.39E-04 | 0.27 | 10.13 | 4.30  | 31540.1  |
| PM-9, 4516 - 4573           | K.LTMVPPNIAELK.N                                                        | 1326.63045 | 1 | 3.39E-04 | 0.27 | 2.66  | -     | 268.4    |
| gi 4758460 ref NP_004479.1  | glycoprotein V (platelet) [Homo sapiens]                                |            |   | 3.50E-04 | 1.87 | 20.29 | 8.90  | 60958.9  |
| PM-4, 5644                  | R.LMISDSHISAVPGTFSDLIK.L                                                | 2203.54435 | 2 | 5.22E-04 | 0.92 | 4.39  | -     | 774.3    |
| PM-4, 6500 - 6502           | K.LVNLQELALNQQLDFLPSALFTNLENL.K.L                                       | 3314.77659 | 3 | 3.50E-04 | 0.95 | 5.80  | -     | 815.5    |
| gi 4758128 ref NP_004725.1  | doublecortin and CaM kinase-like 1; doublecortin-like kinase (Homo sapi |            |   | 3.51E-04 | 0.46 | 10.12 | 1.20  | 81099.6  |
| PM-8, 2014 - 2070           | R.EYALKIHKK.S                                                           | 1106.38297 | 1 | 3.51E-04 | 0.46 | 2.42  | -     | 668.0    |
| PM-7, 1787                  | R.EYALKIHKK.S                                                           | 1106.38297 | 1 | 4.89E-04 | 0.22 | 2.26  | -     | 510.5    |
| gi 4506413 ref NP_002875.1  | RAP1A, member of RAS oncogene family; RAS-related protein RAP1A [Homo s |            |   | 3.70E-04 | 0.91 | 10.19 | 6.50  | 20987.1  |
| PM-10, 6257                 | K.INVNEIFYDLVR.Q                                                        | 1495.70427 | 2 | 3.70E-04 | 0.91 | 3.74  | -     | 1053.2   |
| gi 4757712 ref NP_004026.1  | acyl-Coenzyme A oxidase isoform a; acyl-coenzyme A oxidase 1 [Homo sapi |            |   | 3.81E-04 | 0.75 | 10.18 | 3.90  | 74745.4  |
| PM-5, 5673                  | R.GLETTATYDPETQEFLINSPTVTSIK.W                                          | 2857.11567 | 2 | 3.81E-04 | 0.75 | 3.63  | -     | 277.4    |
| gi 4502989 ref NP_001856.1  | cytochrome c oxidase subunit VIIa polypeptide 2 (liver) precursor; hepa |            |   | 3.83E-04 | 0.92 | 10.17 | 15.70 | 9395.9   |
| PM-12, 5563 - 5619          | K.LFQEDDEIPLYLK.G                                                       | 1623.82758 | 2 | 3.83E-04 | 0.92 | 3.48  | -     | 1346.5   |
| gi 8922712 ref NP_060713.1  | hypothetical protein FLJ10849 [Homo sapiens]                            |            |   | 4.29E-04 | 0.79 | 10.16 | 4.40  | 49397.9  |
| PM-6, 2210                  | K.AAAQLLQSQSQAGQQT.K.K                                                  | 1958.12276 | 2 | 4.29E-04 | 0.79 | 3.26  | -     | 715.5    |
| gi 5453597 ref NP_006126.1  | F-actin capping protein alpha-1 subunit; Cap Z [Homo sapiens]           |            |   | 4.36E-04 | 0.28 | 10.13 | 7.00  | 32922.5  |
| PM-8, 5176                  | K.TIDGQQTIIACIESHQFPK.N                                                 | 2315.59140 | 2 | 4.36E-04 | 0.28 | 2.55  | -     | 238.7    |
| gi 4758984 ref NP_004654.1  | RAB11A, member RAS oncogene family; RAB 11A, member oncogene family [Ho |            |   | 4.65E-04 | 0.80 | 10.15 | 5.10  | 24393.3  |
| PM-9, 2548 - 2555           | K.VVLIGDSGVGK.S                                                         | 1044.22690 | 2 | 4.65E-04 | 0.80 | 2.97  | -     | 963.5    |
| gi 7657431 ref NP_055205.1  | EBNA-2 co-activator (100kD) [Homo sapiens]                              |            |   | 4.83E-04 | 0.58 | 10.15 | 2.40  | 99689.7  |
| PM-4, 6264                  | R.NLPLGVQEGEPFSEATLFTK.E                                                | 2307.54125 | 2 | 4.83E-04 | 0.58 | 3.07  | -     | 261.4    |
| gi 11496277 ref NP_068805.1 | mitogen-activated protein kinase kinase 1 interacting protein 1; MEK p  |            |   | 4.87E-04 | 0.92 | 10.23 | 22.60 | 13622.6  |
| PM-11, 5441 - 5508          | K.VANDNAPEHALRPGFLSTFALATDQGSK.L                                        | 2929.19327 | 3 | 4.87E-04 | 0.92 | 4.51  | -     | 1079.2   |
| gi 6680033 ref NP_031379.1  | guanine nucleotide binding protein (G protein) alpha 12 [Homo sapiens]  |            |   | 5.35E-04 | 0.66 | 10.12 | 2.90  | 44250.9  |
| PM-8, 2886                  | K.IKLLGAGESGK.S                                                         | 1058.25357 | 1 | 5.35E-04 | 0.66 | 2.47  | -     | 796.9    |
| gi 4826854 ref NP_004995.1  | NADH dehydrogenase (ubiquinone) 1 beta subcomplex, 8, 19kDa; NADH dehyd |            |   | 5.63E-04 | 0.36 | 10.13 | 10.20 | 21765.6  |
| PM-10, 4052 - 4064          | R.VEDYEPYPDDGMGYDYPK.L                                                  | 2211.30288 | 2 | 5.63E-04 | 0.36 | 2.54  | -     | 386.6    |
| gi 4502167 ref NP_000475.1  | amyloid beta (A4) precursor protein (protease nexin-II, Alzheimer disea |            |   | 5.68E-04 | 0.84 | 10.17 | 2.20  | 86942.8  |
| PM-3, 4477                  | K.STNLHDYGMILLPCGIDK.V                                                  | 1935.21422 | 2 | 5.68E-04 | 0.84 | 3.35  | -     | 823.9    |
| gi 21314617 ref NP_000433.2 | platelet/endothelial cell adhesion molecule (CD31 antigen); platelet/e  |            |   | 5.77E-04 | 0.23 | 10.21 |       |          |

|                             |                                                                         |            |   |          |      |       |       |          |
|-----------------------------|-------------------------------------------------------------------------|------------|---|----------|------|-------|-------|----------|
| PM-4, 3820                  | R.NILIDFTK.R                                                            | 964.14024  | 1 | 6.45E-04 | 0.23 | 1.93  | -     | 367.3    |
| gi 4505303 ref NP_002466.1  | myosin alkali light chain 1 slow a; myosin light chain 1, slow-twitch m |            |   | 6.50E-04 | 0.12 | 10.14 | 5.30  | 22763.8  |
| PM-11, 2756 - 2811          | K.ILYSQCGDVMR.A                                                         | 1342.57009 | 1 | 6.50E-04 | 0.12 | 2.27  | -     | 146.0    |
| gi 5453559 ref NP_006347.1  | ATP synthase, H+ transporting, mitochondrial F0 complex, subunit d; ATP |            |   | 6.50E-04 | 0.86 | 10.18 | 10.60 | 18491.1  |
| PM-10, 5640 - 5697          | R.LAALPENPPAIDWAYK.A                                                    | 1933.19486 | 2 | 6.50E-04 | 0.86 | 3.68  | -     | 498.7    |
| gi 29738224 ref XP_292615.1 | similar to type I hair keratin 6 [Homo sapiens]                         |            |   | 6.66E-04 | 0.04 | 10.09 | 2.00  | 51806.5  |
| PM-8, 2175                  | K.ICTITKEIK.D                                                           | 1106.36139 | 1 | 6.66E-04 | 0.04 | 1.85  | -     | 216.7    |
| gi 16904381 ref NP_006717.1 | LPS-responsive vesicle trafficking, beach and anchor containing; vesic  |            |   | 6.93E-04 | 0.49 | 10.14 | 0.70  | 319158.3 |
| PM-4, 4246                  | K.DNPSIFVHSPHALMLQDVK.A                                                 | 2149.45847 | 2 | 6.93E-04 | 0.49 | 2.67  | -     | 429.4    |
| gi 18104998 ref NP_001119.2 | adaptor-related protein complex 1, gamma 1 subunit; gamma adaptin; cla  |            |   | 7.76E-04 | 0.80 | 10.13 | 1.70  | 91679.3  |
| PM-5, 5978 - 6045           | K.ELLYFLDSCPEFK.A                                                       | 1791.01361 | 2 | 7.76E-04 | 0.80 | 2.56  | -     | 886.2    |
| gi 17105400 ref NP_477352.1 | phosphatidylinositol 4-kinase, catalytic, alpha polypeptide isoform 2;  |            |   | 9.73E-04 | 0.51 | 10.14 | 1.00  | 231289.6 |
| PM-1, 6619                  | K.ASSAGNLGVLIPVIAVLTR.R                                                 | 1939.28876 | 2 | 9.73E-04 | 0.51 | 2.86  | -     | 447.3    |
| gi 4507857 ref NP_003461.1  | ubiquitin specific protease 7 (herpes virus-associated); Herpes virus-a |            |   | 9.74E-04 | 0.07 | 10.10 | 1.00  | 128271.0 |
| PM-10, 3128                 | R.LQEEKRIEAK.R                                                          | 1372.55267 | 1 | 9.74E-04 | 0.07 | 1.99  | -     | 345.8    |
| gi 20539300 ref XP_088391.4 | similar to tropomyosin 4 [Homo sapiens]                                 |            |   | 9.79E-04 | 0.93 | 10.17 | 6.90  | 18592.1  |
| PM-9, 3312                  | R.KLVILEGELER.A                                                         | 1299.54160 | 2 | 9.79E-04 | 0.93 | 3.34  | -     | 1484.4   |
