# Supplementary material for: Proteomic and Phospho-Proteomic Profile of Human Platelets in Basal, Resting State: Insights into Integrin Signaling
Source: PubMed Central journal article supplement (PMC2762604; doi:10.1371/journal.pone.0007627), 2009-10-27
Supplement: pone.0007627.s010.pdf [file pone.0007627.s010.pdf]

| Entry name     | Gene names                             | Uniprot Accession | Protein names                                                                                                                                                                                                                      | Gene Ontology                                                                                                                                                                                                                                                                                                                                                                                                                                                                                                                                                                                                                                                                                                                                                                                                                                                                                                                                                          | Protein family                                      |
|----------------|----------------------------------------|-------------------|------------------------------------------------------------------------------------------------------------------------------------------------------------------------------------------------------------------------------------|------------------------------------------------------------------------------------------------------------------------------------------------------------------------------------------------------------------------------------------------------------------------------------------------------------------------------------------------------------------------------------------------------------------------------------------------------------------------------------------------------------------------------------------------------------------------------------------------------------------------------------------------------------------------------------------------------------------------------------------------------------------------------------------------------------------------------------------------------------------------------------------------------------------------------------------------------------------------|-----------------------------------------------------|
| 1 AAKB1_HUMAN  | PRKAB1 (AMPK)                          | Q9Y478            | 5'-AMP-activated protein kinase subunit beta-1 (AMPK beta-1 chain) (AMPKb)                                                                                                                                                         | cytoplasm; fatty acid biosynthetic process; nucleus; protein binding; signal transduction                                                                                                                                                                                                                                                                                                                                                                                                                                                                                                                                                                                                                                                                                                                                                                                                                                                                              | 5'-AMP-activated protein kinase beta subunit family |
| 2 ABCA5_HUMAN  | ABCA5 (KIAA1888)                       | Q8WWZ7            | ATP-binding cassette sub-family A member 5                                                                                                                                                                                         | ATP binding; ATPase activity; Golgi membrane; integral to membrane; late endosome membrane; lysosomal membrane; transport                                                                                                                                                                                                                                                                                                                                                                                                                                                                                                                                                                                                                                                                                                                                                                                                                                              | ABC transporter family, ABCA subfamily              |
| 3 ABCF1_HUMAN  | ABCF1 (ABC50)                          | Q8NE71            | ATP-binding cassette sub-family F member 1 (ATP-binding cassette 50) (TNF-alpha-stimulated ABC protein)                                                                                                                            | ATP binding; ATPase activity, coupled to transmembrane movement of substances; inflammatory response; translation; translation factor activity                                                                                                                                                                                                                                                                                                                                                                                                                                                                                                                                                                                                                                                                                                                                                                                                                         | ABC transporter family, EF3 subfamily               |
| 4 ABLM3_HUMAN  | ABLIM3 (KIAA0843) (HMFN1661)           | O94929            | Actin-binding LIM protein 3 (Actin-binding LIM protein family member 3) (abLIM-3)                                                                                                                                                  | actin binding; cytoplasm; cytoskeleton organization; zinc ion binding                                                                                                                                                                                                                                                                                                                                                                                                                                                                                                                                                                                                                                                                                                                                                                                                                                                                                                  |                                                     |
| 5 ACTG_HUMAN   | ACTG1 (ACTB) (ACTG)                    | P63261            | Actin, cytoplasmic 2 (Gamma-actin) [Cleaved into: Actin, cytoplasmic 2, N-terminally processed]                                                                                                                                    | ATP binding; cell motion; cytoplasm; cytoskeleton; identical protein binding; sensory perception of sound; structural constituent of cytoskeleton                                                                                                                                                                                                                                                                                                                                                                                                                                                                                                                                                                                                                                                                                                                                                                                                                      | Actin family                                        |
| 6 ACTH_HUMAN   | ACTG2 (ACTA3) (ACTL3) (ACTSG)          | P63267            | Actin, gamma-enteric smooth muscle (Smooth muscle gamma-actin) (Gamma-2-actin) (Alpha-actin-3)                                                                                                                                     | ATP binding; cytoplasm; cytoskeleton; protein binding                                                                                                                                                                                                                                                                                                                                                                                                                                                                                                                                                                                                                                                                                                                                                                                                                                                                                                                  | Actin family                                        |
| 7 ACTN1_HUMAN  | ACTN1                                  | P12814            | Alpha-actinin-1 (Alpha-actinin cytoskeletal isoform) (Non-muscle alpha-actinin-1) (F-actin cross-linking protein)                                                                                                                  | Z disc; actin binding; calcium ion binding; cytoskeleton; focal adhesion; focal adhesion formation; integrin binding; negative regulation of cell motion; nucleolus; pseudopodium; regulation of anastomosis                                                                                                                                                                                                                                                                                                                                                                                                                                                                                                                                                                                                                                                                                                                                                           | Alpha-actinin family                                |
| 8 ACTN3_HUMAN  | ACTN3                                  | Q08043            | Alpha-actinin-3 (Alpha-actinin skeletal muscle isoform 3) (F-actin cross-linking protein)                                                                                                                                          | actin binding; actin filament; calcium ion binding; focal adhesion; focal adhesion formation; integrin binding; protein homodimerization activity; pseudopodium; regulation of apoptosis; structural constituent of muscle                                                                                                                                                                                                                                                                                                                                                                                                                                                                                                                                                                                                                                                                                                                                             | Alpha-actinin family                                |
| 9 ADAM9_HUMAN  | ADAM9 (KIAA0021) (MCMP) (MDC9) (MLTNG) | Q13443            | Disintegrin and metalloproteinase domain-containing protein 9 (ADAM 9) (EC 3.4.24.-) (Metalloprotease/disintegrin/cysteine-rich protein 9) (Myeloma cell metalloproteinase) (Meltrin-gamma) (Cellular disintegrin-related protein) | PMA-inducible membrane protein ectodomain proteolysis; SH3 domain binding; activation of MAPKK activity; cell-cell adhesion mediated by integrin; cell-matrix adhesion; collagen binding; extracellular space; integral to membrane; integrin binding; integrin-mediated signaling pathway; intrinsic to external side of plasma membrane; keratinocyte differentiation; laminin binding; metalloendopeptidase activity; monocyte activation; phosphate binding; positive regulation of cell adhesion mediated by integrin; positive regulation of keratinocyte migration; positive regulation of macrophage fusion; positive regulation of membrane protein ectodomain proteolysis; positive regulation of protein secretion; protein kinase C binding; response to calcium ion; response to glucocorticoid stimulus; response to hydrogen peroxide; response to manganese ion; response to tumor necrosis factor; transforming growth factor beta receptor signaling |                                                     |
| 10 ADCY6_HUMAN | ADCY6 (KIAA0422)                       | O43306            | Adenylyl cyclase type 6 (EC 4.6.1.1) (Adenylyl cyclase type VI) (ATP pyrophosphate-lyase 6) (Adenylyl cyclase 6) (Ca(2+)-inhibitable adenylyl cyclase)                                                                             | ATP binding; adenylyl cyclase activity; cAMP biosynthetic process; integral to membrane; intracellular signaling cascade; magnesium ion binding                                                                                                                                                                                                                                                                                                                                                                                                                                                                                                                                                                                                                                                                                                                                                                                                                        | Adenylyl cyclase class-4/guanylyl cyclase family    |
| 11 ADDA_HUMAN  | ADD1 (ADDA)                            | P35611            | Alpha-adducin (Erythrocyte adducin subunit alpha)                                                                                                                                                                                  | F-actin capping protein complex; actin filament binding; actin filament bundle formation; barbed-end actin filament capping; calmodulin binding; cytosol; metal ion binding; nucleus; plasma membrane; positive regulation of protein binding; protein heterodimerization activity; protein homodimerization activity; spectrin binding; transcription factor binding                                                                                                                                                                                                                                                                                                                                                                                                                                                                                                                                                                                                  | Aldolase class II family, Adducin subfamily         |

| Entry name     | Gene names                        | Uniprot Accession | Protein names                                                                                                                                                                                                                                                                                                                                                                                | Gene Ontology                                                                                                                                                                                                                                                                                                                                                                                                                                                                                      | Protein family                                               |
|----------------|-----------------------------------|-------------------|----------------------------------------------------------------------------------------------------------------------------------------------------------------------------------------------------------------------------------------------------------------------------------------------------------------------------------------------------------------------------------------------|----------------------------------------------------------------------------------------------------------------------------------------------------------------------------------------------------------------------------------------------------------------------------------------------------------------------------------------------------------------------------------------------------------------------------------------------------------------------------------------------------|--------------------------------------------------------------|
| 12 ADDG_HUMAN  | ADD3 (ADDL)                       | Q9UEY8            | Gamma-adducin (Adducin-like protein 70)                                                                                                                                                                                                                                                                                                                                                      | actin binding; calmodulin binding; cytoplasm; cytoskeleton; metal ion binding; plasma membrane; structural constituent of cytoskeleton                                                                                                                                                                                                                                                                                                                                                             | Aldolase class II family, Adducin subfamily                  |
| 13 AFAP1_HUMAN | AFAP1 (AFAP)                      | Q8N556            | Actin filament-associated protein 1 (110 kDa actin filament-associated protein) (AFAP-110)                                                                                                                                                                                                                                                                                                   | actin binding; cytoplasm; cytoskeleton                                                                                                                                                                                                                                                                                                                                                                                                                                                             | Class I fructose-bisphosphate aldolase family                |
| 14 ALDOA_HUMAN | ALDOA (ALDA)                      | P04075            | Fructose-bisphosphate aldolase A (EC 4.1.2.13) (Muscle-type aldolase) (Lung cancer antigen NY-LU-1)                                                                                                                                                                                                                                                                                          | ATP biosynthetic process; I band; actin binding; actin cytoskeleton; actin filament organization; extracellular vesicular exosome; fructose 1,6-bisphosphate metabolic process; fructose binding; fructose-bisphosphate aldolase activity; glycolysis; identical protein binding; muscle maintenance; nucleus; regulation of cell shape; striated muscle contraction; tubulin binding                                                                                                              |                                                              |
| 15 AMPD2_HUMAN | AMPD2                             | Q01433            | AMP deaminase 2 (EC 3.5.4.6) (AMP deaminase isoform L)                                                                                                                                                                                                                                                                                                                                       | AMP deaminase activity; purine base metabolic process; purine ribonucleoside monophosphate biosynthetic process                                                                                                                                                                                                                                                                                                                                                                                    | Adenosine and AMP deaminases family                          |
| 16 ANLN_HUMAN  | ANLN                              | Q9NQW6            | Actin-binding protein anillin                                                                                                                                                                                                                                                                                                                                                                | actin binding; contractile ring; cytokinesis; mitosis; nucleus; regulation of exit from mitosis; septin ring assembly                                                                                                                                                                                                                                                                                                                                                                              |                                                              |
| 17 APOL1_HUMAN | APOL1 (APOL)                      | O14791            | Apolipoprotein L1 (Apolipoprotein L-1) (ApoL-1) (Apolipoprotein L) (Apo-L) (ApoL)                                                                                                                                                                                                                                                                                                            | chloride channel activity; chloride transport; cholesterol metabolic process; cytotoxicity; high-density lipoprotein particle; innate immune response; intrinsic to membrane; killing of cells of another organism; lipid binding; lipid transport; lipoprotein metabolic process; protein binding                                                                                                                                                                                                 | Apolipoprotein L family                                      |
| 18 ARAP1_HUMAN | ARAP1 (CENTD2) (KIAA0782)         | Q96P48            | Arf-GAP, Rho-GAP domain, ANK repeat and PH domain-containing protein 1 (Centaurin-delta-2) (Cnt-d2)                                                                                                                                                                                                                                                                                          | ARF GTPase activator activity; Golgi cisterna membrane; Rho GTPase activator activity; actin filament reorganization during cell cycle; negative regulation of stress fiber formation; phosphatidylinositol-3,4,5-trisphosphate binding; plasma membrane; positive regulation of Cdc42 GTPase activity; positive regulation of filopodium assembly; protein binding; regulation of ARF GTPase activity; regulation of cell motion; regulation of cell shape; signal transduction; zinc ion binding |                                                              |
| 19 ARHG6_HUMAN | ARHGEF6 (COOL2) (KIAA0006) (PIXA) | Q15052            | Rho guanine nucleotide exchange factor 6 (Rac/Cdc42 guanine nucleotide exchange factor 6) (PAK-interacting exchange factor alpha) (Alpha-Pix) (COOL-2)                                                                                                                                                                                                                                       | GTPase activator activity; JNK cascade; Rho guanyl-nucleotide exchange factor activity; apoptosis; cytoplasm; regulation of Rho protein signal transduction                                                                                                                                                                                                                                                                                                                                        | Arrestin family                                              |
| 20 ARR1_HUMAN  | ARRB1 (ARR1)                      | P49407            | Beta-arrestin-1 (Arrestin beta-1)                                                                                                                                                                                                                                                                                                                                                            | cytoplasm; enzyme inhibitor activity; membrane fraction; plasma membrane; protein binding; signal transduction; soluble fraction                                                                                                                                                                                                                                                                                                                                                                   |                                                              |
| 21 ASAP1_HUMAN | ASAP1 (DDEF1) (KIAA1249)          | Q9ULH1            | Arf-GAP with SH3 domain, ANK repeat and PH domain-containing protein 1 (130 kDa phosphatidylinositol 4,5-bisphosphate-dependent ARF1 GTPase-activating protein) (PIP2-dependent ARF1 GAP) (ADP-ribosylation factor-directed GTPase-activating protein 1) (ARF GTPase-activating protein 1) (Development and differentiation-enhancing factor 1) (Differentiation-enhancing factor 1) (DFF-1) | ARF GTPase activator activity; cytoplasm; membrane; protein binding; regulation of ARF GTPase activity; zinc ion binding                                                                                                                                                                                                                                                                                                                                                                           |                                                              |
| 22 ASAP2_HUMAN | ASAP2 (DDEF2) (KIAA0400)          | O43150            | Arf-GAP with SH3 domain, ANK repeat and PH domain-containing protein 2 (Development and differentiation-enhancing factor 2) (Pyk2 C-terminus-associated protein) (PAP) (Paxillin-associated protein with ARFGAP activity 3) (PAG3)                                                                                                                                                           | ARF GTPase activator activity; Golgi cisterna membrane; plasma membrane; protein binding; regulation of ARF GTPase activity; zinc ion binding                                                                                                                                                                                                                                                                                                                                                      |                                                              |
| 23 AT2A2_HUMAN | ATP2A2 (ATP2B)                    | P16615            | Sarcoplasmic/endoplasmic reticulum calcium ATPase 2 (SERCA2) (EC 3.6.3.8) (Calcium pump 2) (Calcium-transporting ATPase sarcoplasmic reticulum type, slow twitch skeletal muscle isoform) (SR Ca(2+)-ATPase 2) (Endoplasmic reticulum class 1/2 Ca(2+) ATPase)                                                                                                                               | ATP binding; ATP biosynthetic process; S100 alpha binding; calcium ion binding; calcium-transporting ATPase activity; cell adhesion; epidermis development; integral to plasma membrane; magnesium ion binding; microsome; sarcoplasmic reticulum calcium ion transport; sarcoplasmic reticulum membrane                                                                                                                                                                                           | Cation transport ATPase (P-type) family, Type IIIA subfamily |

| Entry name      | Gene names                          | Uniprot Accession | Protein names                                                                                                                  | Gene Ontology                                                                                                                                                                                                                                                                                                                                                                                                                                                                                                                                                                                                                                              | Protein family                                                 |
|-----------------|-------------------------------------|-------------------|--------------------------------------------------------------------------------------------------------------------------------|------------------------------------------------------------------------------------------------------------------------------------------------------------------------------------------------------------------------------------------------------------------------------------------------------------------------------------------------------------------------------------------------------------------------------------------------------------------------------------------------------------------------------------------------------------------------------------------------------------------------------------------------------------|----------------------------------------------------------------|
| 24 BCAT1_HUMAN  | BCAT1 (BCT1) (ECA39)                | P54687            | Branched-chain-amino-acid aminotransferase, cytosolic (BCAT(c)) (EC 2.6.1.42) (Protein ECA39)                                  | G1/S transition of mitotic cell cycle; branched chain family amino acid biosynthetic process; branched-chain-amino-acid transaminase activity; cell proliferation                                                                                                                                                                                                                                                                                                                                                                                                                                                                                          | Class-IV pyridoxal-phosphate-dependent aminotransferase family |
| 25 BCL3_HUMAN   | BCL3 (BCL4) (D19S37)                | P20749            | B-cell lymphoma 3-encoded protein (Protein Bcl-3)                                                                              | Bcl3-Bcl10 complex; Bcl3/NF-kappaB2 complex; DNA damage response, signal transduction by p53 class mediator resulting in induction of apoptosis; I-kappaB kinase/NF-kappaB cascade; cytoplasm; maintenance of protein location in nucleus; negative regulation of apoptosis; negative regulation of interleukin-8 biosynthetic process; negative regulation of transcription; nucleus; positive regulation of translation; protein binding, bridging; protein import into nucleus, translocation; regulation of DNA binding; regulation of NF-kappaB import into nucleus; response to UV-C; response to virus; transcription; transcription factor binding |                                                                |
| 26 BET1L_HUMAN  | BET1L (GS15)                        | Q9NYM9            | BET1-like protein (Vesicle transport protein GOS15) (Golgi SNARE with a size of 15 kDa) (GOS-15) (GS15)                        | Golgi membrane; SNAP receptor activity; SNARE complex; endosome; integral to membrane; protein transport; retrograde transport, endosome to Golgi                                                                                                                                                                                                                                                                                                                                                                                                                                                                                                          |                                                                |
| 27 BIN2_HUMAN   | BIN2 (BRAP1)                        | Q9UBW5            | Bridging integrator 2 (Breast cancer-associated protein 1)                                                                     | cytoplasm; protein binding                                                                                                                                                                                                                                                                                                                                                                                                                                                                                                                                                                                                                                 |                                                                |
| 28 BNIP2_HUMAN  | BNIP2 (NIP2)                        | Q12982            | BCL2/adenovirus E1B 19 kDa protein-interacting protein 2                                                                       | GTPase activator activity; anti-apoptosis; apoptosis; calcium ion binding; nuclear envelope; perinuclear region of cytoplasm; protein binding                                                                                                                                                                                                                                                                                                                                                                                                                                                                                                              |                                                                |
| 29 C2CD2L_HUMAN | C2CD2L (KIAA0285) (TMEM24) (DLNB23) | O14523            | C2 domain-containing protein 2-like (Transmembrane protein 24)                                                                 | integral to membrane                                                                                                                                                                                                                                                                                                                                                                                                                                                                                                                                                                                                                                       |                                                                |
| 30 CA062_HUMAN  | C1orf62                             | O5T1N1            | Uncharacterized protein C1orf62                                                                                                |                                                                                                                                                                                                                                                                                                                                                                                                                                                                                                                                                                                                                                                            |                                                                |
| 31 CALD1_HUMAN  | CALD1 (CAD) (CDM)                   | Q05682            | Caldesmon (CDM)                                                                                                                | actin binding; calmodulin binding; cell motion; cytoskeleton; muscle contraction; myosin binding; tropomyosin binding                                                                                                                                                                                                                                                                                                                                                                                                                                                                                                                                      | Caldesmon family                                               |
| 32 CALX_HUMAN   | CANX                                | P27824            | Calnexin (Major histocompatibility complex class I antigen-binding protein p88) (p90) (IP90)                                   | calcium ion binding; endoplasmic reticulum membrane; integral to membrane; melanosome; protein folding; protein secretion; sugar binding; unfolded protein binding                                                                                                                                                                                                                                                                                                                                                                                                                                                                                         | Calreticulin family                                            |
| 33 CAP1_HUMAN   | CAP1 (CAP)                          | Q01518            | Adenylyl cyclase-associated protein 1 (CAP 1)                                                                                  | actin binding; activation of adenylate cyclase activity; establishment or maintenance of cell polarity; plasma membrane; signal transduction                                                                                                                                                                                                                                                                                                                                                                                                                                                                                                               | CAP family                                                     |
| 34 CASS4_HUMAN  | CASS4 (C20orf32) (HEFL)             | Q9NQ75            | Cas scaffolding protein family member 4 (HEF1-EFS-p130Cas-like protein) (HEFL) (HEF-like protein)                              | cell adhesion; cytoplasm; cytoskeleton; focal adhesion; protein binding; signal transduction; two-component sensor activity                                                                                                                                                                                                                                                                                                                                                                                                                                                                                                                                | CAS family                                                     |
| 35 CCM2_HUMAN   | CCM2 (C7orf22) (PP10187)            | Q9BSQ5            | Malcavernin (Cerebral cavernous malformations 2 protein)                                                                       | cytoplasm; integrin-mediated signaling pathway; protein binding; stress-activated MAPK cascade; vasculogenesis                                                                                                                                                                                                                                                                                                                                                                                                                                                                                                                                             |                                                                |
| 36 CCNY_HUMAN   | CCNY (C10orf9) (CBCP1) (CFP1)       | Q8ND76            | Cyclin-Y (Cyclin fold protein 1) (Cyclin box protein 1)                                                                        | nucleus                                                                                                                                                                                                                                                                                                                                                                                                                                                                                                                                                                                                                                                    | Cyclin family, Cyclin Y subfamily                              |
| 37 CD2AP_HUMAN  | CD2AP                               | Q9Y5K6            | CD2-associated protein (Cas ligand with multiple SH3 domains) (Adapter protein CMS)                                            | SH3 domain binding; cell division; filamentous actin; mitosis; nucleolus; plasma membrane; protein complex assembly; ruffle; signal transduction; structural constituent of cytoskeleton; substrate-bound cell migration, cell extension                                                                                                                                                                                                                                                                                                                                                                                                                   |                                                                |
| 38 CE170_HUMAN  | CEP170 (FAM68A) (KAB) (KIAA0470)    | Q5SW79            | Centrosomal protein of 170 kDa (Cep170) (KARP-1-binding protein) (KARP1-binding protein)                                       | centriole; microtubule                                                                                                                                                                                                                                                                                                                                                                                                                                                                                                                                                                                                                                     | CEP170 family                                                  |
| 39 CI167_HUMAN  | C9orf167                            | Q9NXH8            | Torsin family protein C9orf167                                                                                                 | ATP binding; chaperone mediated protein folding requiring cofactor; endoplasmic reticulum; integral to membrane; nucleoside-triphosphatase activity                                                                                                                                                                                                                                                                                                                                                                                                                                                                                                        | CiPA/clpB family, Torsin subfamily                             |
| 40 CIP4_HUMAN   | TRIP10 (CIP4) (STOT) (STP)          | Q15642            | Cdc42-interacting protein 4 (Thyroid receptor-interacting protein 10) (TRIP-10) (Protein Felic) (Salt tolerant protein) (hSTP) | Golgi apparatus; actin cytoskeleton organization; cell cortex; cytoskeleton; endocytosis; identical protein binding; lipid binding; lysosome; perinuclear region of cytoplasm; plasma membrane; signal transduction                                                                                                                                                                                                                                                                                                                                                                                                                                        | FNBP1 family                                                   |

| Entry name     | Gene names                                   | Uniprot Accession | Protein names                                                                                                                                                                                                                                                                                                                                                                                                                                                                                                                                                                                                                                            | Gene Ontology                                                                                                                                                                                                                                                                                                                                                                                                                                                                                                                                                                                                                                                                                                                                                                                                                                                      | Protein family                                                                     |
|----------------|----------------------------------------------|-------------------|----------------------------------------------------------------------------------------------------------------------------------------------------------------------------------------------------------------------------------------------------------------------------------------------------------------------------------------------------------------------------------------------------------------------------------------------------------------------------------------------------------------------------------------------------------------------------------------------------------------------------------------------------------|--------------------------------------------------------------------------------------------------------------------------------------------------------------------------------------------------------------------------------------------------------------------------------------------------------------------------------------------------------------------------------------------------------------------------------------------------------------------------------------------------------------------------------------------------------------------------------------------------------------------------------------------------------------------------------------------------------------------------------------------------------------------------------------------------------------------------------------------------------------------|------------------------------------------------------------------------------------|
| 41 CKLF6_HUMAN | CMTM6 (CKLFSF6)                              | Q9NX76            | CKLF-like MARVEL transmembrane domain-containing protein 6 (Chemokine-like factor superfamily member 6)                                                                                                                                                                                                                                                                                                                                                                                                                                                                                                                                                  | chemotaxis; cytokine activity; extracellular space; integral to membrane                                                                                                                                                                                                                                                                                                                                                                                                                                                                                                                                                                                                                                                                                                                                                                                           | Chemokine-like factor family                                                       |
| 42 CLP1_HUMAN  | CLP1 (HEAB)                                  | Q92989            | Polyribonucleotide 5'-hydroxyl-kinase Clp1 (EC 2.7.1.78) (Polynucleotide kinase Clp1) (Pre-mRNA cleavage complex II protein Clp1)                                                                                                                                                                                                                                                                                                                                                                                                                                                                                                                        | ATP binding; ATP-dependent polydeoxyribonucleotide 5'-hydroxyl-kinase activity; ATP-dependent polyribonucleotide 5'-hydroxyl-kinase activity; GTP binding; RNA interference, siRNA loading onto RISC; RNA interference, targeting of mRNA for destruction; mRNA 3'-end processing; nuclear mRNA splicing, via spliceosome; tRNA splicing, via endonucleolytic cleavage and ligation; tRNA-intron endonuclease complex activation of caspase activity; blood circulation; cell adhesion; cell proliferation; cell surface receptor linked signal transduction; collagen type IV; extracellular matrix structural constituent; extracellular space; induction of apoptosis; integrin binding; metalloendopeptidase inhibitor activity; negative regulation of angiogenesis; negative regulation of cell proliferation; sensory perception of sound; zinc ion binding | Clp1 family                                                                        |
| 43 CO4A3_HUMAN | COL4A3                                       | Q01955            | Collagen alpha-3(IV) chain (Goodpasture antigen) [Cleaved into: Tumstatin]                                                                                                                                                                                                                                                                                                                                                                                                                                                                                                                                                                               | activation of caspase activity; blood circulation; cell adhesion; cell proliferation; cell surface receptor linked signal transduction; collagen type IV; extracellular matrix structural constituent; extracellular space; induction of apoptosis; integrin binding; metalloendopeptidase inhibitor activity; negative regulation of angiogenesis; negative regulation of cell proliferation; sensory perception of sound; zinc ion binding                                                                                                                                                                                                                                                                                                                                                                                                                       | Type IV collagen family                                                            |
| 44 CSRP1_HUMAN | CSRP1 (CSRP) (CYRP)                          | P21291            | Cysteine and glycine-rich protein 1 (Cysteine-rich protein 1) (CRP1) (CRP)                                                                                                                                                                                                                                                                                                                                                                                                                                                                                                                                                                               | cell proliferation; chemokine activity; chemotaxis; defense response to bacterium; extracellular space; glucose transmembrane transporter activity; glucose transport; growth factor activity; immune response; platelet alpha granule lumen                                                                                                                                                                                                                                                                                                                                                                                                                                                                                                                                                                                                                       | Interocrine alpha (chemokine CxC) family                                           |
| 45 CXCL7_HUMAN | PPBP (CTAP3) (CXCL7) (SCYB7) (TGB1) (THBGB1) | P02775            | Platelet basic protein (PBP) (C-X-C motif chemokine 7) (Small-inducible cytokine B7) (Leukocyte-derived growth factor) (LDGF) (Macrophage-derived growth factor) (MDGF) [Cleaved into: Connective tissue-activating peptide III (CTAP-III) (Low-affinity platelet factor IV) (LA-PF4); TC-2; Connective tissue-activating peptide III(1-81) (CTAP-III(1-81)); Beta-thromboglobulin (Beta-TG); Neutrophil-activating peptide 2(74) (NAP-2(74)); Neutrophil-activating peptide 2(73) (NAP-2(73)); Neutrophil-activating peptide 2 (NAP-2); TC-1; Neutrophil-activating peptide 2(1-66) (NAP-2(1-66)); Neutrophil-activating peptide 2(1-63) (NAP-2(1-63))] | apoptosis; induction of apoptosis by extracellular signals; cytoplasm; membrane; phospholipid binding; protein amino acid dephosphorylation; protein binding; protein tyrosine phosphatase activity; signal transduction                                                                                                                                                                                                                                                                                                                                                                                                                                                                                                                                                                                                                                           |                                                                                    |
| 46 DAP1_HUMAN  | DAP (DAP1)                                   | P51397            | Death-associated protein 1 (DAP-1)                                                                                                                                                                                                                                                                                                                                                                                                                                                                                                                                                                                                                       | Rac protein signal transduction; activation of JUN kinase activity; cell cortex; cytoskeleton; endocytosis; enzyme activator activity; identical protein binding; immune response; lamellipodium                                                                                                                                                                                                                                                                                                                                                                                                                                                                                                                                                                                                                                                                   | ABP1 family                                                                        |
| 47 DAPP1_HUMAN | DAPP1 (BAM32) (HSPC066)                      | Q9UN19            | Dual adapter for phosphotyrosine and 3-phosphotyrosine and 3-phosphoinositide (hDAPP1) (B-cell adapter molecule of 32 kDa) (B lymphocyte adapter protein Bam32)                                                                                                                                                                                                                                                                                                                                                                                                                                                                                          | ATP binding; dynein complex; microtubule; motor activity                                                                                                                                                                                                                                                                                                                                                                                                                                                                                                                                                                                                                                                                                                                                                                                                           | Dynein light intermediate chain family                                             |
| 48 DBNL_HUMAN  | DBNL (CMAP) (SH3P7) (PP5423)                 | Q9UJU6            | Drebrin-like protein (Drebrin-F) (SH3 domain-containing protein 7) (Cervical SH3P7) (HPK1-interacting protein of 55 kDa) (HIP-55) (Cervical mucin-associated protein)                                                                                                                                                                                                                                                                                                                                                                                                                                                                                    | actin binding; actin cytoskeleton; actin filament bundle formation; barbed-end actin filament capping                                                                                                                                                                                                                                                                                                                                                                                                                                                                                                                                                                                                                                                                                                                                                              | Villin/gelsolin family                                                             |
| 49 DC1L1_HUMAN | DYNC1L1 (DNCLI1)                             | Q9Y6G9            | Cytoplasmic dynein 1 light intermediate chain 1 (Dynein light intermediate chain 1, cytosolic) (Dynein light chain A) (DLC-A)                                                                                                                                                                                                                                                                                                                                                                                                                                                                                                                            | heat shock protein binding; melanosome; membrane; protein folding; unfolded protein binding                                                                                                                                                                                                                                                                                                                                                                                                                                                                                                                                                                                                                                                                                                                                                                        | DOK family, Type A subfamily                                                       |
| 50 DEMA_HUMAN  | EPB49 (DMT)                                  | Q08495            | Dematin (Erythrocyte membrane protein band 4.9)                                                                                                                                                                                                                                                                                                                                                                                                                                                                                                                                                                                                          | cytoplasm; insulin receptor binding; plasma membrane; actin binding; actin filament organization; actomyosin; cytoplasm; dendrite; profilin binding; regulation of dendrite development; regulation of neuronal synaptic plasticity                                                                                                                                                                                                                                                                                                                                                                                                                                                                                                                                                                                                                                |                                                                                    |
| 51 DEN2C_HUMAN | DENND2C                                      | Q68D51            | DENN domain-containing protein 2C                                                                                                                                                                                                                                                                                                                                                                                                                                                                                                                                                                                                                        | D-amino acid catabolic process; cytoplasm; hydrolase activity, acting on ester bonds                                                                                                                                                                                                                                                                                                                                                                                                                                                                                                                                                                                                                                                                                                                                                                               | DTD family                                                                         |
| 52 DNJC5_HUMAN | DNAJC5 (CSP)                                 | Q9H3Z4            | DnaJ homolog subfamily C member 5 (Cysteine string protein) (CSP)                                                                                                                                                                                                                                                                                                                                                                                                                                                                                                                                                                                        | ATP binding; nervous system development; non-membrane spanning protein tyrosine kinase activity; nuclear speck; peptidyl-tyrosine phosphorylation; protein amino acid autophosphorylation; protein self-association; protein serine/threonine kinase activity                                                                                                                                                                                                                                                                                                                                                                                                                                                                                                                                                                                                      | Protein kinase superfamily, CMGC Ser/Thr protein kinase family, MNB/DYRK subfamily |
| 53 DOK3_HUMAN  | DOK3                                         | Q7L591            | Docking protein 3 (Downstream of tyrosine kinase 3)                                                                                                                                                                                                                                                                                                                                                                                                                                                                                                                                                                                                      |                                                                                                                                                                                                                                                                                                                                                                                                                                                                                                                                                                                                                                                                                                                                                                                                                                                                    |                                                                                    |
| 54 DREB_HUMAN  | DBN1 (D0S117E)                               | Q16643            | Drebrin (Developmentally-regulated brain protein)                                                                                                                                                                                                                                                                                                                                                                                                                                                                                                                                                                                                        |                                                                                                                                                                                                                                                                                                                                                                                                                                                                                                                                                                                                                                                                                                                                                                                                                                                                    |                                                                                    |
| 55 DTD1_HUMAN  | DTD1 (C20orf88) (HARS2)                      | Q8TEA8            | D-tyrosyl-tRNA(Tyr) deacylase 1 (EC 3.1.-.-) (Histidyl-tRNA synthetase-related)                                                                                                                                                                                                                                                                                                                                                                                                                                                                                                                                                                          |                                                                                                                                                                                                                                                                                                                                                                                                                                                                                                                                                                                                                                                                                                                                                                                                                                                                    |                                                                                    |
| 56 DYR1A_HUMAN | DYRK1A (DYRK) (MNB) (MNBH)                   | Q13627            | Dual specificity tyrosine-phosphorylation-regulated kinase 1A (EC 2.7.12.1) (Protein kinase minibrain homolog) (MNBH) (hMNB) (HP86) (Dual specificity YAK1-related kinase)                                                                                                                                                                                                                                                                                                                                                                                                                                                                               |                                                                                                                                                                                                                                                                                                                                                                                                                                                                                                                                                                                                                                                                                                                                                                                                                                                                    |                                                                                    |

| Entry name     | Gene names                  | Uniprot Accession | Protein names                                                                                                                                                                                                    | Gene Ontology                                                                                                                                                                                                                                                                                            | Protein family                                                                |
|----------------|-----------------------------|-------------------|------------------------------------------------------------------------------------------------------------------------------------------------------------------------------------------------------------------|----------------------------------------------------------------------------------------------------------------------------------------------------------------------------------------------------------------------------------------------------------------------------------------------------------|-------------------------------------------------------------------------------|
| 57 EF1B_HUMAN  | EEF1B2 (EEF1B) (EF1B)       | P24534            | Elongation factor 1-beta (EF-1-beta)                                                                                                                                                                             | cytosol; eukaryotic translation elongation factor 1 complex; protein binding; translation elongation factor activity; translational elongation                                                                                                                                                           | EF-1-beta/EF-1-delta family                                                   |
| 58 EPHA6_HUMAN | EPHA6 (EHK2)                | Q9UF33            | Ephrin type-A receptor 6 (EC 2.7.10.1) (Tyrosine-protein kinase receptor EHK-2) (EPH homology kinase 2)                                                                                                          | ATP binding; ephrin receptor activity; integral to membrane; protein amino acid phosphorylation; transmembrane receptor protein tyrosine kinase signaling pathway                                                                                                                                        | Protein kinase superfamily, Tyrosine kinase family, Ephrin receptor subfamily |
| 59 EPS15_HUMAN | EPS15 (AF1P)                | P42566            | Epidermal growth factor receptor substrate 15 (Protein Eps15) (Protein AF-1p)                                                                                                                                    | SH3 domain binding; calcium ion binding; cell proliferation; coated pit; cytosol; early endosome membrane; epidermal growth factor receptor signaling pathway; protein transport; vesicle organization                                                                                                   |                                                                               |
| 60 ESAM_HUMAN  | ESAM (UNQ220/PRO246)        | Q96AP7            | Endothelial cell-selective adhesion molecule                                                                                                                                                                     | adherens junction; integral to membrane; protein binding; tight junction                                                                                                                                                                                                                                 |                                                                               |
| 61 ESYT2_HUMAN | FAM62B (ESYT2) (KIAA1228)   | A0FGR8            | Extended synaptotagmin-2 (E-Syt2) (Chr2Syt) (Protein FAM62B)                                                                                                                                                     | integral to membrane; plasma membrane                                                                                                                                                                                                                                                                    | Extended synaptotagmin family                                                 |
| 62 EXOC7_HUMAN | EXOC7 (EXO70) (KIAA1067)    | Q9UPT5            | Exocyst complex component 7 (Exocyst complex component Exo70)                                                                                                                                                    | centriolar satellite; cytosol; exocyst; exocytosis; plasma membrane; protein transport                                                                                                                                                                                                                   | EXO70 family                                                                  |
| 63 F10A1_HUMAN | ST13 (FAM10A1) (HIP) (SNC6) | P50502            | Hsc70-interacting protein (Hip) (Suppression of tumorigenicity protein 13) (Putative tumor suppressor ST13) (Protein FAM10A1) (Progesterone receptor-associated p48 protein) (Renal carcinoma antigen NY-REN-33) | cytoplasm; protein binding, bridging; protein folding                                                                                                                                                                                                                                                    | FAM10 family                                                                  |
| 64 FA5_HUMAN   | F5                          | P12259            | Coagulation factor V (Activated protein C cofactor) (Proaccelerin, labile factor) [Cleaved into: Coagulation factor V heavy chain; Coagulation factor V light chain]                                             | blood coagulation; calcium ion binding; cell adhesion; copper ion binding; oxidoreductase activity; plasma membrane; platelet alpha granule lumen                                                                                                                                                        | Multicopper oxidase family                                                    |
| 65 FA63A_HUMAN | FAM63A (KIAA1390)           | Q8N5J2            | Protein FAM63A                                                                                                                                                                                                   | protein binding                                                                                                                                                                                                                                                                                          | FAM63 family                                                                  |
| 66 FA65C_HUMAN | FAM65C (C20orf175)          | Q96MK2            | Protein FAM65C                                                                                                                                                                                                   |                                                                                                                                                                                                                                                                                                          | FAM65 family                                                                  |
| 67 FARP2_HUMAN | FARP2 (KIAA0793)            | O94887            | FERM, RhoGEF and pleckstrin domain-containing protein 2 (FERM domain including RhoGEF) (FIR)                                                                                                                     | Rac protein signal transduction; Rho guanyl-nucleotide exchange factor activity; cytoplasm; cytoskeletal protein binding; cytoskeleton; extrinsic to membrane; neuron remodeling; regulation of Rho protein signal transduction                                                                          |                                                                               |
| 68 FBP1L_HUMAN | FBNP1L (C1orf39) (TOCA1)    | Q5TON5            | Formin-binding protein 1-like (Transducer of Cdc42-dependent actin assembly protein 1) (Toca-1)                                                                                                                  | cell cortex; cytoplasmic vesicle; cytoskeleton; endocytosis; lipid binding; plasma membrane                                                                                                                                                                                                              | FBNP1 family                                                                  |
| 69 FCERG_HUMAN | FCER1G                      | P30273            | High affinity immunoglobulin epsilon receptor subunit gamma (IgE Fc receptor subunit gamma) (FceRI gamma) (Fc-epsilon RI-gamma)                                                                                  | integral to plasma membrane                                                                                                                                                                                                                                                                              | CD3Z/FCER1G family                                                            |
| 70 FETUA_HUMAN | AHSG (FETUA) (PRO2743)      | P02765            | Alpha-2-HS-glycoprotein (Ba-alpha-2-glycoprotein) (Alpha-2-Z-globulin) (Fetuin-A) [Cleaved into: Alpha-2-HS-glycoprotein chain A; Alpha-2-HS-glycoprotein chain B]                                               | acute-phase response; cysteine-type endopeptidase inhibitor activity; extracellular space; negative regulation of bone mineralization; negative regulation of insulin receptor signaling pathway; pinocytosis; positive regulation of phagocytosis; protein binding; regulation of inflammatory response | Fetuin family                                                                 |
| 71 FGD3_HUMAN  | FGD3 (ZFYVE5)               | Q5JSP0            | FYVE, RhoGEF and PH domain-containing protein 3 (Zinc finger FYVE domain-containing protein 5)                                                                                                                   | Golgi apparatus; Rho guanyl-nucleotide exchange factor activity; actin cytoskeleton organization; cytoskeleton; filopodium assembly; lamellipodium; regulation of Cdc42 GTPase activity; regulation of cell shape; ruffle; small GTPase binding; zinc ion binding                                        |                                                                               |
| 72 FHOD1_HUMAN | FHOD1 (FHOS) (FHOS1)        | Q9Y613            | FH1/FH2 domain-containing protein 1 (Formin homolog overexpressed in spleen 1) (FHOS) (Formin homology 2 domain-containing protein 1)                                                                            | actin binding; actin cytoskeleton organization; cytoplasm; cytoskeleton; nucleus                                                                                                                                                                                                                         | Formin homology family                                                        |
| 73 FIBA_HUMAN  | FGA                         | P02671            | Fibrinogen alpha chain [Cleaved into: Fibrinopeptide A]                                                                                                                                                          | eukaryotic cell surface binding; external side of plasma membrane; fibrinogen complex; platelet activation; platelet alpha granule lumen; protein binding, bridging; protein polymerization; receptor binding; response to calcium ion; signal transduction                                              |                                                                               |

| Entry name      | Gene names                               | Uniprot Accession | Protein names                                                                                                                                                                     | Gene Ontology                                                                                                                                                                                                                                                                                                                                                                                                                                                                                                                                                                                                                                                                                                                                                                                                                  | Protein family                                  |
|-----------------|------------------------------------------|-------------------|-----------------------------------------------------------------------------------------------------------------------------------------------------------------------------------|--------------------------------------------------------------------------------------------------------------------------------------------------------------------------------------------------------------------------------------------------------------------------------------------------------------------------------------------------------------------------------------------------------------------------------------------------------------------------------------------------------------------------------------------------------------------------------------------------------------------------------------------------------------------------------------------------------------------------------------------------------------------------------------------------------------------------------|-------------------------------------------------|
| 74 FINC_HUMAN   | FN1 (FN)                                 | P02751            | Fibronectin (FN) (Cold-insoluble globulin) (CIG) [Cleaved into: Ugl-Y1; Ugl-Y2; Ugl-Y3]                                                                                           | ER-Golgi intermediate compartment; acute-phase response; cell migration; collagen binding; extracellular matrix structural constituent; fibrinogen complex; heparin binding; peptide cross-linking; platelet alpha granule lumen; proteinaceous extracellular matrix; regulation of cell shape; substrate adhesion-dependent cell spreading; transmembrane receptor protein tyrosine kinase signaling pathway; axon; cytoplasm; protein folding                                                                                                                                                                                                                                                                                                                                                                                |                                                 |
| 75 FKBP15_HUMAN | FKBP15 (KIAA0674)                        | Q5T1M5            | FK506-binding protein 15                                                                                                                                                          |                                                                                                                                                                                                                                                                                                                                                                                                                                                                                                                                                                                                                                                                                                                                                                                                                                | FKBP-type PPIase family                         |
| 76 FLNA_HUMAN   | FLNA (FLN) (FLN1)                        | P21333            | Filamin-A (Alpha-filamin) (Filamin-1) (Endothelial actin-binding protein) (Actin-binding protein 280) (ABP-280) (Non-muscle filamin)                                              | Fc-gamma receptor I complex binding; GTP-Ral binding; Rac GTPase binding; actin crosslink formation; actin cytoskeleton; actin cytoskeleton reorganization; actin filament binding; cell cortex; cytoplasmic sequestering of protein; establishment of protein localization; glycoprotein binding; inhibition of adenylate cyclase activity by dopamine receptor signaling pathway; negative regulation of protein catabolic process; negative regulation of transcription factor activity; nucleus; plasma membrane; positive regulation of I-kappaB kinase/NF-kappaB cascade; positive regulation of transcription factor import into nucleus; protein homodimerization activity; protein localization at cell surface; protein stabilization; receptor clustering; signal transducer activity; transcription factor binding | Filamin family                                  |
| 77 FRIH_HUMAN   | FTH1 (FTH) (FTHL6) (OK/SW-cl.84) (PIG15) | P02794            | Ferritin heavy chain (Ferritin H subunit) (EC 1.16.3.1) (Cell proliferation-inducing gene 15 protein)                                                                             | cell proliferation; ferric iron binding; ferroxidase activity; immune response; intracellular ferritin complex; intracellular sequestering of iron ion; iron ion transport; negative regulation of cell proliferation; oxidation reduction; protein binding; cytoplasm; cytoskeleton                                                                                                                                                                                                                                                                                                                                                                                                                                                                                                                                           | Ferritin family                                 |
| 78 FRM4B_HUMAN  | FRMD4B (KIAA1013)                        | Q9Y2L6            | FERM domain-containing protein 4B (GRP1-binding protein GRSP1)                                                                                                                    |                                                                                                                                                                                                                                                                                                                                                                                                                                                                                                                                                                                                                                                                                                                                                                                                                                |                                                 |
| 79 FYB_HUMAN    | FYB (SLAP130)                            | O15117            | FYN-binding protein (FYN-T-binding protein) (FYB-120/130) (p120/p130) (SLP-76-associated phosphoprotein) (SLAP-130) (Adhesion and degranulation promoting adaptor protein) (ADAP) | NLS-bearing substrate import into nucleus; cytoplasm; immune response; nucleus; protein amino acid phosphorylation; protein binding; protein kinase cascade                                                                                                                                                                                                                                                                                                                                                                                                                                                                                                                                                                                                                                                                    |                                                 |
| 80 G3P_HUMAN    | GAPDH (GAPD) (CDABP0047) (OK/SW-cl.12)   | P04406            | Glyceraldehyde-3-phosphate dehydrogenase (GAPDH) (EC 1.2.1.12)                                                                                                                    | NAD or NADH binding; glyceraldehyde-3-phosphate dehydrogenase (phosphorylating) activity; glycolysis; membrane; oxidation reduction; perinuclear region of cytoplasm; protein binding                                                                                                                                                                                                                                                                                                                                                                                                                                                                                                                                                                                                                                          | Glyceraldehyde-3-phosphate dehydrogenase family |
| 81 G6B_HUMAN    | G6B (C6orf25)                            | O95866            | Protein G6b                                                                                                                                                                       | Golgi apparatus; endoplasmic reticulum; heparin binding; integral to membrane; plasma membrane; receptor activity                                                                                                                                                                                                                                                                                                                                                                                                                                                                                                                                                                                                                                                                                                              |                                                 |
| 82 GA2L1_HUMAN  | GAS2L1 (GAR22)                           | Q99501            | GAS2-like protein 1 (Growth arrest-specific protein 2-like 1) (GAS2-related protein on chromosome 22)                                                                             | cell cycle arrest; cytoplasm; cytoskeleton                                                                                                                                                                                                                                                                                                                                                                                                                                                                                                                                                                                                                                                                                                                                                                                     | GAS2 family                                     |
| 83 GI24_HUMAN   | C10orf54 (PP2135) (UNQ730/PRO1412)       | Q9H7M9            | Platelet receptor Gi24                                                                                                                                                            | integral to membrane; receptor activity                                                                                                                                                                                                                                                                                                                                                                                                                                                                                                                                                                                                                                                                                                                                                                                        |                                                 |
| 84 GP1BA_HUMAN  | GP1BA                                    | P07359            | Platelet glycoprotein Ib alpha chain (Glycoprotein Ibalpha) (GP-Ib alpha) (GPIb-alpha) (GPIbA) (Antigen CD42b-alpha) (CD antigen CD42b) [Cleaved into: Glycocalicin]              | cell adhesion; cell surface receptor linked signal transduction; fibrinolysis; integral to plasma membrane; membrane fraction; platelet activation; platelet alpha granule membrane; protein binding; thrombin receptor activity                                                                                                                                                                                                                                                                                                                                                                                                                                                                                                                                                                                               |                                                 |
| 85 GP1BB_HUMAN  | GP1BB                                    | P13224            | Platelet glycoprotein Ib beta chain (GP-Ib beta) (GPIb-beta) (GPIbB) (Antigen CD42b-beta) (CD antigen CD42c)                                                                      | cell adhesion; cell surface receptor linked signal transduction; integral to plasma membrane; platelet activation; platelet alpha granule membrane; protein binding; transmembrane receptor activity                                                                                                                                                                                                                                                                                                                                                                                                                                                                                                                                                                                                                           |                                                 |
| 86 GPSM3_HUMAN  | GPSM3 (AGS4) (C6orf9) (G18)              | Q9Y4H4            | G-protein-signaling modulator 3 (Activator of G-protein signaling 4) (Protein G18) (G18.1b)                                                                                       | GTPase activator activity; cytoplasm; protein binding; signal transduction                                                                                                                                                                                                                                                                                                                                                                                                                                                                                                                                                                                                                                                                                                                                                     |                                                 |

| Entry name     | Gene names                        | Uniprot Accession | Protein names                                                                                                                                                                                                                                                                   | Gene Ontology                                                                                                                                                                                                                                                                                                                                                                                                                                                                                                         | Protein family                                                                                      |
|----------------|-----------------------------------|-------------------|---------------------------------------------------------------------------------------------------------------------------------------------------------------------------------------------------------------------------------------------------------------------------------|-----------------------------------------------------------------------------------------------------------------------------------------------------------------------------------------------------------------------------------------------------------------------------------------------------------------------------------------------------------------------------------------------------------------------------------------------------------------------------------------------------------------------|-----------------------------------------------------------------------------------------------------|
| 87 GRAP2_HUMAN | GRAP2 (GADS) (GRB2L) (GRID)       | O75791            | GRB2-related adapter protein 2 (Protein GADS) (Growth factor receptor-binding protein) (GRBLG) (Grf40 adapter protein) (Grf40) (GRB-2-like protein) (GRB2L) (GRBX) (P38) (Hematopoietic cell-associated adapter protein GrpL) (Adapter protein GRID) (SH3-SH2-SH3 adapter Mona) | Ras protein signal transduction; SH3/SH2 adaptor activity; cell-cell signaling; cytosol; nucleus                                                                                                                                                                                                                                                                                                                                                                                                                      | GRB2/sem-5/DRK family                                                                               |
| 88 GRK6_HUMAN  | GRK6 (GPRK6)                      | P43250            | G protein-coupled receptor kinase 6 (EC 2.7.11.16) (G protein-coupled receptor kinase GRK6)                                                                                                                                                                                     | ATP binding; G-protein coupled receptor kinase activity; membrane; protein amino acid phosphorylation; regulation of G-protein coupled receptor protein signaling pathway; signal transducer activity; signal transduction                                                                                                                                                                                                                                                                                            | Protein kinase superfamily, AGC Ser/Thr protein kinase family, GPRK subfamily                       |
| 89 GRP2_HUMAN  | RASGRP2 (CDC25L) (MCG7)           | Q7LDG7            | RAS guanyl-releasing protein 2 (Calcium and DAG-regulated guanine nucleotide exchange factor 1) (CalDAG-GEF1) (F25B3.3 kinase-like protein) (Cdc25-like protein) (HCDC25L)                                                                                                      | Ras protein signal transduction; calcium ion binding; cell junction; cytosol; diacylglycerol binding; guanyl-nucleotide exchange factor activity; regulation of cell growth; regulation of small GTPase mediated signal transduction; ruffle membrane; synapse; synaptosome; zinc ion binding                                                                                                                                                                                                                         | RASGRP family                                                                                       |
| 90 GSK3B_HUMAN | GSK3B                             | P49841            | Glycogen synthase kinase-3 beta (GSK-3 beta) (EC 2.7.11.26)                                                                                                                                                                                                                     | ATP binding; Axin-APC-beta-catenin-GSK3B complex; ER overload response; NF-kappaB binding; Wnt receptor signaling pathway through beta-catenin; beta-catenin binding; beta-catenin destruction complex; cytosol; glycogen metabolic process; glycogen synthase kinase 3 activity; nucleus; p53 binding; peptidyl-serine phosphorylation; positive regulation of protein complex assembly; positive regulation of protein export from nucleus; protein kinase A catalytic subunit binding; tau-protein kinase activity | Protein kinase superfamily, CMGC Ser/Thr protein kinase family, GSK-3 subfamily                     |
| 91 GTR3_HUMAN  | SLC2A3 (GLUT3)                    | P11169            | Solute carrier family 2, facilitated glucose transporter member 3 (Glucose transporter type 3, brain) (GLUT-3)                                                                                                                                                                  | carbohydrate metabolic process; cytoplasm; glucose transmembrane transporter activity; glucose transport; integral to membrane; plasma membrane; sugar:hydrogen symporter activity; transmembrane transport cell communication; phosphoinositide binding; protein binding                                                                                                                                                                                                                                             | Major facilitator superfamily, Sugar transporter (TC 2.A.1.1) family, Glucose transporter subfamily |
| 92 H1BP3_HUMAN | HS1BP3                            | Q53T59            | HCLS1-binding protein 3 (HS1-binding protein 3) (HSP1BP-3)                                                                                                                                                                                                                      | GTPase activator activity; diacylglycerol binding; intracellular; intracellular signaling cascade; zinc ion binding                                                                                                                                                                                                                                                                                                                                                                                                   |                                                                                                     |
| 93 HMHA1_HUMAN | HMHA1 (KIAA0223)                  | Q92619            | Minor histocompatibility protein HA-1 [Cleaved into: Minor histocompatibility antigen HA-1 (mHag HA-1)]                                                                                                                                                                         | ATP binding; TPR domain binding; cellular chaperone-mediated protein complex assembly; cytosol; melanosome; mitochondrial outer membrane translocase complex assembly; mitochondrial transport; nitric-oxide synthase regulator activity; positive regulation of nitric oxide biosynthetic process; protein homodimerization activity; protein refolding; response to unfolded protein; signal transduction; unfolded protein binding                                                                                 | Heat shock protein 90 family                                                                        |
| 94 HS90A_HUMAN | HSP90AA1 (HSP90A) (HSPC1) (HSPCA) | P07900            | Heat shock protein HSP 90-alpha (HSP 86) (Renal carcinoma antigen NY-REN-38)                                                                                                                                                                                                    | ATP binding; TPR domain binding; melanosome; negative regulation of proteasomal ubiquitin-dependent protein catabolic process; nitric-oxide synthase regulator activity; positive regulation of nitric oxide biosynthetic process; protein folding; regulation of interferon-gamma-mediated signaling pathway; regulation of type I interferon-mediated signaling pathway; response to unfolded protein; unfolded protein binding                                                                                     | Heat shock protein 90 family                                                                        |
| 95 HS90B_HUMAN | HSP90AB1 (HSP90B) (HSPC2) (HSPCB) | P08238            | Heat shock protein HSP 90-beta (HSP 90) (HSP 84)                                                                                                                                                                                                                                | ATP binding; TPR domain binding; melanosome; negative regulation of proteasomal ubiquitin-dependent protein catabolic process; nitric-oxide synthase regulator activity; positive regulation of nitric oxide biosynthetic process; protein folding; regulation of interferon-gamma-mediated signaling pathway; regulation of type I interferon-mediated signaling pathway; response to unfolded protein; unfolded protein binding                                                                                     | Heat shock protein 90 family                                                                        |
| 96 HSP71_HUMAN | HSPA1A (HSPA1); HSPA1B            | P08107            | Heat shock 70 kDa protein 1 (HSP70.1) (HSP70-1/HSP70-2)                                                                                                                                                                                                                         | ATP binding; anti-apoptosis; endoplasmic reticulum; mRNA catabolic process; mitochondrion; nucleus; response to unfolded protein; unfolded protein binding                                                                                                                                                                                                                                                                                                                                                            | Heat shock protein 70 family                                                                        |

| Entry name      | Gene names                                    | Uniprot Accession | Protein names                                                                                                                                                                                                                                                                                                                                                | Gene Ontology                                                                                                                                                                                                                                                                                                                                                                                                                                                                                 | Protein family                                                 |
|-----------------|-----------------------------------------------|-------------------|--------------------------------------------------------------------------------------------------------------------------------------------------------------------------------------------------------------------------------------------------------------------------------------------------------------------------------------------------------------|-----------------------------------------------------------------------------------------------------------------------------------------------------------------------------------------------------------------------------------------------------------------------------------------------------------------------------------------------------------------------------------------------------------------------------------------------------------------------------------------------|----------------------------------------------------------------|
| 97 HSPB1_HUMAN  | HSPB1 (HSP27) (HSP28)                         | P04792            | Heat shock protein beta-1 (HspB1) (Heat shock 27 kDa protein) (HSP 27) (Stress-responsive protein 27) (SRP27) (Estrogen-regulated 24 kDa protein) (28 kDa heat shock protein)                                                                                                                                                                                | anti-apoptosis; cell death; cell motion; cell surface; cytoplasm; identical protein binding; nucleus; regulation of translational initiation; response to heat; response to unfolded protein; spindle                                                                                                                                                                                                                                                                                         | Small heat shock protein (HSP20) family                        |
| 98 HUWE1_HUMAN  | HUWE1 (KIAA0312) (KIAA1578) (UREB1) (HSPC272) | Q7Z6Z7            | E3 ubiquitin-protein ligase HUWE1 (EC 6.3.2.-) (HECT, UBA and WWE domain-containing protein 1) (Upstream regulatory element-binding protein 1) (URE-binding protein 1) (URE-B1) (Mcl-1 ubiquitin ligase E3) (Mule) (ARF-binding protein 1) (ARF-BP1) (Large structure of UREB1) (LASU1) (Homologous to E6AP carboxyl terminus homologous protein 9) (HectH9) | DNA binding; cell differentiation; cytoplasm; histone ubiquitination; modification-dependent protein catabolic process; nucleus; protein binding; protein polyubiquitination; ubiquitin-protein ligase activity                                                                                                                                                                                                                                                                               | TOM1/PTR1 family                                               |
| 99 IF2P_HUMAN   | EIF5B (IF2) (KIAA0741)                        | O60841            | Eukaryotic translation initiation factor 5B (eIF-5B) (Translation initiation factor IF-2)                                                                                                                                                                                                                                                                    | GTP binding; GTPase activity; cytoplasm; protein binding; regulation of translational initiation; translation; translation initiation factor activity                                                                                                                                                                                                                                                                                                                                         | IF-2 family                                                    |
| 100 ILK_HUMAN   | ILK (ILK1) (ILK2)                             | Q13418            | Integrin-linked protein kinase (EC 2.7.11.1) (ILK-1) (ILK-2) (59 kDa serine/threonine-protein kinase) (p59ILK)                                                                                                                                                                                                                                               | ATP binding; cell proliferation; cell-matrix adhesion; cytoplasm; focal adhesion; integrin-mediated signaling pathway; protein amino acid phosphorylation; protein binding; protein serine/threonine kinase activity; protein tyrosine kinase activity; regulation of signal transduction                                                                                                                                                                                                     | Protein kinase superfamily, TKL Ser/Thr protein kinase family  |
| 101 INF2_HUMAN  | INF2 (C14orf151) (C14orf173)                  | Q27J81            | Inverted formin-2 (HBEBP2-binding protein C)                                                                                                                                                                                                                                                                                                                 | Rho GTPase binding; actin binding; actin cytoskeleton organization; endoplasmic reticulum: nucleus                                                                                                                                                                                                                                                                                                                                                                                            | Formin homology family                                         |
| 102 IPP2_HUMAN  | PPP1R2 (IPP2)                                 | P41236            | Protein phosphatase inhibitor 2 (IPP-2)                                                                                                                                                                                                                                                                                                                      | glycogen metabolic process; protein binding; protein serine/threonine phosphatase inhibitor activity; regulation of phosphoprotein phosphatase activity; regulation of signal transduction                                                                                                                                                                                                                                                                                                    | Protein phosphatase inhibitor 2 family                         |
| 103 IQGA2_HUMAN | IQGAP2                                        | Q13576            | Ras GTPase-activating-like protein IQGAP2                                                                                                                                                                                                                                                                                                                    | GTPase inhibitor activity; Ras GTPase activator activity; actin binding; actin cytoskeleton; calmodulin binding; regulation of small GTPase mediated signal transduction; small GTPase mediated signal transduction                                                                                                                                                                                                                                                                           |                                                                |
| 104 ITB3_HUMAN  | ITGB3 (GP3A)                                  | P05106            | Integrin beta-3 (Platelet membrane glycoprotein IIIa) (GPIIIa) (CD antigen CD61)                                                                                                                                                                                                                                                                             | blood coagulation; cell-matrix adhesion; identical protein binding; integrin complex; integrin-mediated signaling pathway; interspecies interaction between organisms; negative regulation of foam cell differentiation; negative regulation of lipid storage; negative regulation of lipid transport; negative regulation of lipoprotein metabolic process; negative regulation of low-density lipoprotein receptor biosynthetic process; platelet alpha granule membrane; receptor activity | Integrin beta chain family                                     |
| 105 ITPR1_HUMAN | ITPR1 (INSP3R1)                               | Q14643            | Inositol 1,4,5-trisphosphate receptor type 1 (Type 1 inositol 1,4,5-trisphosphate receptor) (Type 1 InsP3 receptor) (IP3 receptor isoform 1) (InsP3R1) (IP3R)                                                                                                                                                                                                | calcium ion binding; calcium ion transmembrane transporter activity; calcium ion transport; cell death; endoplasmic reticulum membrane; inositol 1,4,5-trisphosphate-sensitive calcium-release channel activity; inositol-1,4,5-trisphosphate receptor activity; integral to membrane; platelet dense granule membrane; platelet dense tubular network membrane; protein binding; response to hypoxia; signal transduction                                                                    | InsP3 receptor family                                          |
| 106 JAM1_HUMAN  | F11R (JAM1) (JCAM) (UNQ264/PRO301)            | Q9Y624            | Junctional adhesion molecule A (JAM-A) (Junctional adhesion molecule 1) (JAM-1) (Platelet adhesion molecule 1) (PAM-1) (Platelet F11 receptor) (CD antigen CD321)                                                                                                                                                                                            | inflammatory response; integral to membrane; interspecies interaction between organisms; tight junction                                                                                                                                                                                                                                                                                                                                                                                       | Immunoglobulin superfamily                                     |
| 107 KALRN_HUMAN | KALRN (DUET) (DUO) (HAPIP) (TRAD)             | O60229            | Kalirin (EC 2.7.11.1) (Huntingtin-associated protein-interacting protein) (Protein Duo) (Serine/threonine kinase with Dbl- and pleckstrin homology domain)                                                                                                                                                                                                   | ATP binding; Rho guanyl-nucleotide exchange factor activity; actin cytoskeleton; cytoplasm; intracellular signaling cascade; magnesium ion binding; nervous system development; protein amino acid phosphorylation; protein serine/threonine kinase activity; regulation of Rho protein signal transduction; vesicle-mediated transport                                                                                                                                                       | Protein kinase superfamily, CAMK Ser/Thr protein kinase family |



| Entry name | Gene names  | Uniprot Accession           | Protein names | Gene Ontology                                                                                                                                                                                                                                                                                                                                             | Protein family                                                                                                                                                                                                                                                                                                                                                                                                                                                                                                                                    |                                                                               |
|------------|-------------|-----------------------------|---------------|-----------------------------------------------------------------------------------------------------------------------------------------------------------------------------------------------------------------------------------------------------------------------------------------------------------------------------------------------------------|---------------------------------------------------------------------------------------------------------------------------------------------------------------------------------------------------------------------------------------------------------------------------------------------------------------------------------------------------------------------------------------------------------------------------------------------------------------------------------------------------------------------------------------------------|-------------------------------------------------------------------------------|
| 108        | KAP2_HUMAN  | PRKAR2A (PKR2) (PRKAR2)     | P13861        | cAMP-dependent protein kinase type II-alpha regulatory subunit                                                                                                                                                                                                                                                                                            | cAMP binding; cAMP-dependent protein kinase complex; cAMP-dependent protein kinase regulator activity; cytoplasm; hormone-mediated signaling; membrane fraction; plasma membrane; regulation of protein amino acid phosphorylation                                                                                                                                                                                                                                                                                                                | CAMP-dependent kinase regulatory chain family                                 |
| 109        | KAP3_HUMAN  | PRKAR2B                     | P31323        | cAMP-dependent protein kinase type II-beta regulatory subunit                                                                                                                                                                                                                                                                                             | Golgi apparatus; cAMP binding; cAMP-dependent protein kinase complex; cAMP-dependent protein kinase regulator activity; centrosome; hormone-mediated signaling; mitochondrion; regulation of protein amino acid phosphorylation                                                                                                                                                                                                                                                                                                                   | CAMP-dependent kinase regulatory chain family                                 |
| 110        | KAPCG_HUMAN | PRKACG                      | P22612        | cAMP-dependent protein kinase catalytic subunit gamma (PKA C-gamma) (EC 2.7.11.11)                                                                                                                                                                                                                                                                        | ATP binding; cAMP-dependent protein kinase activity; hormone-mediated signaling; male gonad development; protein amino acid phosphorylation; protein kinase cascade: spermatogenesis                                                                                                                                                                                                                                                                                                                                                              | Protein kinase superfamily, AGC Ser/Thr protein kinase family, cAMP subfamily |
| 111        | KGP1B_HUMAN | PRKG1 (PRKG1B) (PRKGR1B)    | P14619        | cGMP-dependent protein kinase 1, beta isozyme (cGK 1 beta) (cGKI-beta) (EC 2.7.11.12)                                                                                                                                                                                                                                                                     | ATP binding; actin cytoskeleton organization; cGMP binding; cGMP-dependent protein kinase activity; cytoplasm; nucleus; protein amino acid phosphorylation; signal transduction                                                                                                                                                                                                                                                                                                                                                                   | Protein kinase superfamily, AGC Ser/Thr protein kinase family, cGMP subfamily |
| 112        | KIF11_HUMAN | KIF11 (EG5) (KNSL1) (TRIP5) | P52732        | Kinesin-like protein KIF11 (Kinesin-related motor protein Eg5) (Kinesin-like spindle protein HKSP) (Thyroid receptor-interacting protein 5) (TRIP-5) (Kinesin-like protein 1)                                                                                                                                                                             | ATP binding; cell division; chromatin remodeling complex; cytoplasm; kinesin complex; microtubule; microtubule motor activity; microtubule-based movement; mitosis; mitotic spindle organization; spindle; spindle pole body organization                                                                                                                                                                                                                                                                                                         | Kinesin-like protein family, BimC subfamily                                   |
| 113        | KNG1_HUMAN  | KNG1 (BDK) (KNG)            | P01042        | Kininogen-1 (High molecular weight kininogen) (HMWK) (Williams-Fitzgerald-Flaujeac factor) (Fitzgerald factor) (Alpha-2-thiol proteinase inhibitor) [Cleaved into: Kininogen-1 heavy chain; T-kinin (Ile-Ser-Bradykinin); Bradykinin (Kallidin I); Lysyl-bradykinin (Kallidin II); Kininogen-1 light chain; Low molecular weight growth-promoting factor] | blood coagulation; centrosome; cysteine-type endopeptidase inhibitor activity; diuresis; elevation of cytosolic calcium ion concentration; extracellular space; heparin binding; inflammatory response; natriuresis; negative regulation of blood coagulation; negative regulation of cell adhesion; nucleus; positive regulation of apoptosis; receptor binding; smooth muscle contraction; vasodilation; zinc ion binding                                                                                                                       |                                                                               |
| 114        | KPCA_HUMAN  | PRKCA (PKCA) (PRKACA)       | P17252        | Protein kinase C alpha type (PKC-alpha) (PKC-A) (EC 2.7.11.13)                                                                                                                                                                                                                                                                                            | ATP binding; calcium ion binding; cytosol; diacylglycerol binding; induction of apoptosis by extracellular signals; membrane fraction; plasma membrane; protein amino acid phosphorylation; protein binding; zinc ion binding                                                                                                                                                                                                                                                                                                                     | Protein kinase superfamily, AGC Ser/Thr protein kinase family, PKC subfamily  |
| 115        | KPCB_HUMAN  | PRKCB (PKCB) (PRKCB1)       | P05771        | Protein kinase C beta type (PKC-beta) (PKC-B) (EC 2.7.11.13)                                                                                                                                                                                                                                                                                              | ATP binding; calcium ion binding; cytosol; diacylglycerol binding; intracellular signaling cascade; lipoprotein transport; plasma membrane; protein amino acid phosphorylation; protein binding; protein kinase C activity; zinc ion binding                                                                                                                                                                                                                                                                                                      | Protein kinase superfamily, AGC Ser/Thr protein kinase family, PKC subfamily  |
| 116        | KPCD_HUMAN  | PRKCD                       | Q05655        | Protein kinase C delta type (EC 2.7.11.13) (nPKC-delta)                                                                                                                                                                                                                                                                                                   | ATP binding; calcium-independent protein kinase C activity; cytosol; diacylglycerol binding; enzyme activator activity; enzyme binding; insulin receptor substrate binding; intracellular signaling cascade; membrane; negative regulation of insulin receptor signaling pathway; negative regulation of peptidyl-tyrosine phosphorylation; negative regulation of protein binding; nucleus; protein C-terminus binding; protein amino acid phosphorylation; protein stabilization; regulation of receptor activity; senescence; zinc ion binding | Protein kinase superfamily, AGC Ser/Thr protein kinase family, PKC subfamily  |

| Entry name      | Gene names                             | Uniprot Accession | Protein names                                                                                                                                                                                                                                                                                                                                            | Gene Ontology                                                                                                                                                                                                                                                                                                                                                                                                                                                                   | Protein family                                                               |
|-----------------|----------------------------------------|-------------------|----------------------------------------------------------------------------------------------------------------------------------------------------------------------------------------------------------------------------------------------------------------------------------------------------------------------------------------------------------|---------------------------------------------------------------------------------------------------------------------------------------------------------------------------------------------------------------------------------------------------------------------------------------------------------------------------------------------------------------------------------------------------------------------------------------------------------------------------------|------------------------------------------------------------------------------|
| 117 KPCT_HUMAN  | PRKCQ (PRKCT)                          | Q04759            | Protein kinase C theta type (EC 2.7.11.13) (nPKC-theta)                                                                                                                                                                                                                                                                                                  | ATP binding; diacylglycerol binding; intracellular; intracellular signaling cascade; magnesium ion binding; membrane protein ectodomain proteolysis; protein amino acid phosphorylation; protein binding; protein kinase C activity; regulation of cell growth; zinc ion binding                                                                                                                                                                                                | Protein kinase superfamily, AGC Ser/Thr protein kinase family, PKC subfamily |
| 118 KPYM_HUMAN  | PKM2 (PK2) (PK3) (PKM)                 | P14618            | Pyruvate kinase isozymes M1/M2 (EC 2.7.1.40) (Pyruvate kinase muscle isozyme) (Pyruvate kinase 2/3) (Cytosolic thyroid hormone-binding protein) (CTHBP) (THBP1)                                                                                                                                                                                          | ATP binding; cytosol; glycolysis; magnesium ion binding; potassium ion binding; protein binding; pyruvate kinase activity                                                                                                                                                                                                                                                                                                                                                       | Pyruvate kinase family                                                       |
| 119 KSR1_HUMAN  | KSR1 (KSR)                             | Q8IVT5            | Kinase suppressor of Ras 1                                                                                                                                                                                                                                                                                                                               | ATP binding; Ras protein signal transduction; cytoplasm; diacylglycerol binding; membrane; protein amino acid phosphorylation; protein binding; protein serine/threonine kinase activity; protein tyrosine kinase activity; zinc ion binding                                                                                                                                                                                                                                    | Protein kinase superfamily, TKL Ser/Thr protein kinase family                |
| 120 LAT_HUMAN   | LAT                                    | O43561            | Linker for activation of T-cells family member 1 (36 kDa phospho-tyrosine adapter protein) (pp36) (p36-38)                                                                                                                                                                                                                                               | Ras protein signal transduction; SH3/SH2 adaptor activity; calcium-mediated signaling; immunological synapse; integral to membrane; integrin-mediated signaling pathway; mast cell degranulation; membrane raft; regulation of T cell activation                                                                                                                                                                                                                                |                                                                              |
| 121 LEGL_HUMAN  | GRP (HSPC159)                          | Q3ZCW2            | Galectin-related protein                                                                                                                                                                                                                                                                                                                                 | intracellular; sugar binding                                                                                                                                                                                                                                                                                                                                                                                                                                                    |                                                                              |
| 122 LRC47_HUMAN | LRRRC47 (KIAA1185)                     | Q8N1G4            | Leucine-rich repeat-containing protein 47                                                                                                                                                                                                                                                                                                                | RNA binding; phenylalanine-tRNA ligase activity; protein binding; translation                                                                                                                                                                                                                                                                                                                                                                                                   |                                                                              |
| 123 LRMP_HUMAN  | LRMP (JAW1)                            | Q12912            | Lymphoid-restricted membrane protein (Protein Jaw1) [Cleaved into: Processed lymphoid-restricted membrane protein]                                                                                                                                                                                                                                       | endoplasmic reticulum membrane; integral to plasma membrane; nucleus; vesicle fusion; vesicle targeting                                                                                                                                                                                                                                                                                                                                                                         |                                                                              |
| 124 LRRF2_HUMAN | LRRFIP2                                | Q9Y608            | Leucine-rich repeat flightless-interacting protein 2 (LRR FLII-interacting protein 2)                                                                                                                                                                                                                                                                    | LRR domain binding; Wnt receptor signaling pathway                                                                                                                                                                                                                                                                                                                                                                                                                              | LRRFIP family                                                                |
| 125 LY66F_HUMAN | LY6G6F (C6orf21) (G6F) (LY6G6D) (NG32) | Q5SQ64            | Lymphocyte antigen 6 complex locus protein 6f                                                                                                                                                                                                                                                                                                            | integral to membrane; plasma membrane                                                                                                                                                                                                                                                                                                                                                                                                                                           |                                                                              |
| 126 LYN_HUMAN   | LYN                                    | P07948            | Tyrosine-protein kinase Lyn (EC 2.7.10.2)                                                                                                                                                                                                                                                                                                                | ATP binding; Golgi apparatus; erythrocyte differentiation; interspecies interaction between organisms; membrane raft; non-membrane spanning protein tyrosine kinase activity; nucleus; plasma membrane; positive regulation of cell proliferation; positive regulation of tyrosine phosphorylation of STAT protein; protein amino acid phosphorylation; protein binding; receptor signaling protein tyrosine kinase activity; response to hormone stimulus; signal transduction | Protein kinase superfamily, Tyr protein kinase family, SRC subfamily         |
| 127 M6BPB_HUMAN | M6PRBP1 (TIP47)                        | O60664            | Mannose-6-phosphate receptor-binding protein 1 (Cargo selection protein TIP47) (47 kDa mannose 6-phosphate receptor-binding protein) (47 kDa MPR-binding protein) (Placental protein 17) (PP17)                                                                                                                                                          | Golgi apparatus; endosome membrane; monolayer-surrounded lipid storage body outer lipid monolayer; vesicle-mediated transport                                                                                                                                                                                                                                                                                                                                                   | Perilipin family                                                             |
| 128 MAVS_HUMAN  | MAVS (IPS1) (KIAA1271) (VISA)          | Q7Z434            | Mitochondrial antiviral-signaling protein (Interferon-beta promoter stimulator protein 1) (IPS-1) (Virus-induced-signaling adapter) (CARD adapter inducing interferon-beta) (Cardif) (Putative NF-kappa-B-activating protein 031N)                                                                                                                       | innate immune response; integral to membrane; interspecies interaction between organisms; mitochondrial outer membrane; positive regulation of I-kappaB kinase/NF-kappaB cascade; protein binding; response to virus; signal transducer activity                                                                                                                                                                                                                                |                                                                              |
| 129 MED7_HUMAN  | MED7 (ARC34) (CRSP9)                   | O43513            | Mediator of RNA polymerase II transcription subunit 7 (Mediator complex subunit 7) (Cofactor required for Sp1 transcriptional activation subunit 9) (CRSP complex subunit 9) (Transcriptional coactivator CRSP33) (RNA polymerase transcriptional regulation mediator subunit 7 homolog) (hMED7) (Activator-recruited cofactor 34 kDa component) (ARC34) | RNA polymerase II transcription mediator activity; mediator complex; regulation of transcription from RNA polymerase II promoter; transcription coactivator activity; transcription factor complex; transcription initiation from RNA polymerase II promoter                                                                                                                                                                                                                    | Mediator complex subunit 7 family                                            |
| 130 MFS6_HUMAN  | MFS6 (MMR2)                            | Q6ZSS7            | Major facilitator superfamily domain-containing protein 6 (Macrophage MHC class I receptor 2 homolog)                                                                                                                                                                                                                                                    | integral to membrane                                                                                                                                                                                                                                                                                                                                                                                                                                                            | Major facilitator superfamily, MFS6 family                                   |
| 131 ML12B_HUMAN | MYL12B (MRLC2) (MYLC2B)                | O14950            | Myosin regulatory light chain 12B (Myosin regulatory light chain MRLC2) (Myosin regulatory light chain 2-B, smooth muscle isoform) (MLC-2A) (MLC-2) (SHUJUN-1)                                                                                                                                                                                           | calcium ion binding; motor activity; myosin complex                                                                                                                                                                                                                                                                                                                                                                                                                             |                                                                              |

| Entry name      | Gene names                        | Uniprot Accession | Protein names                                                                                                                                                                                                       | Gene Ontology                                                                                                                                                                                                                                                                                                                                                                                                                                                                                                                                                                                                                                               | Protein family                                                 |
|-----------------|-----------------------------------|-------------------|---------------------------------------------------------------------------------------------------------------------------------------------------------------------------------------------------------------------|-------------------------------------------------------------------------------------------------------------------------------------------------------------------------------------------------------------------------------------------------------------------------------------------------------------------------------------------------------------------------------------------------------------------------------------------------------------------------------------------------------------------------------------------------------------------------------------------------------------------------------------------------------------|----------------------------------------------------------------|
| 132 MOES_HUMAN  | MSN                               | P26038            | Moesin (Membrane-organizing extension spike protein)                                                                                                                                                                | apical plasma membrane; cell adhesion molecule binding; cytoplasm; cytoskeletal protein binding; cytoskeleton; extrinsic to membrane; filopodium; leukocyte adhesion; leukocyte migration; membrane to membrane docking; microvillus membrane; receptor binding; structural constituent of cytoskeleton                                                                                                                                                                                                                                                                                                                                                     |                                                                |
| 133 MOL1B_HUMAN | MOBK1B (C2orf6) (MOB4B) (MOBK1B)  | Q9H8S9            | Mps one binder kinase activator-like 1B (Mob1 homolog 1B) (Mob1 alpha) (Mob1A) (Protein Mob4B)                                                                                                                      | protein binding; zinc ion binding                                                                                                                                                                                                                                                                                                                                                                                                                                                                                                                                                                                                                           | MOB1/phocein family                                            |
| 134 MRV11_HUMAN | MRV11 (IRAG) (JAW1L)              | Q9Y6F6            | Protein MRV11 (Inositol 1,4,5-triphosphate receptor-associated cGMP kinase substrate) (JAW1-related protein MRV11)                                                                                                  | endoplasmic reticulum membrane; integral to membrane; nucleus; perinuclear region of cytoplasm; sarcoplasmic reticulum                                                                                                                                                                                                                                                                                                                                                                                                                                                                                                                                      |                                                                |
| 135 MTPN_HUMAN  | MTPN                              | P58546            | Myotrophin (Protein V-1)                                                                                                                                                                                            | cell growth; cytoplasm; protein binding; regulation of striated muscle development; regulation of translation                                                                                                                                                                                                                                                                                                                                                                                                                                                                                                                                               | Myotrophin family                                              |
| 136 MY18A_HUMAN | MYO18A (KIAA0216) (MYSPODZ)       | Q92614            | Myosin-XVIIIa (Myosin containing a PDZ domain) (Molecule associated with JAK3 N-terminus) (MAJN)                                                                                                                    | ATP binding; ER-Golgi intermediate compartment; anti-apoptosis; identical protein binding; motor activity; myosin complex                                                                                                                                                                                                                                                                                                                                                                                                                                                                                                                                   |                                                                |
| 137 MYCPP_HUMAN | DENND4A (IRLB) (MYCPBP)           | Q7Z401            | C-myc promoter-binding protein (DENN domain-containing protein 4A)                                                                                                                                                  | DNA binding; nucleus; protein binding; regulation of transcription, DNA-dependent; transcription nucleus                                                                                                                                                                                                                                                                                                                                                                                                                                                                                                                                                    |                                                                |
| 138 MYCT1_HUMAN | MYCT1 (MTLC) (MTMC1)              | Q8N699            | Myc target protein 1 (Myc target in myeloid cells protein 1)                                                                                                                                                        |                                                                                                                                                                                                                                                                                                                                                                                                                                                                                                                                                                                                                                                             | MYCT1 family                                                   |
| 139 MYH9_HUMAN  | MYH9                              | P35579            | Myosin-9 (Myosin heavy chain 9) (Myosin heavy chain, non-muscle IIa) (Non-muscle myosin heavy chain IIa) (NMMHC II-a) (NMMHC-IIA) (Cellular myosin heavy chain, type A) (Non-muscle myosin heavy chain A) (NMMHC-A) | ADP binding; ATP binding; actin cytoskeleton reorganization; actin filament binding; actin filament-based movement; actin-dependent ATPase activity; angiogenesis; blood vessel endothelial cell migration; calmodulin binding; cleavage furrow; contractile ring; cytokinesis; cytosol; integrin-mediated signaling pathway; leukocyte migration; membrane protein ectodomain proteolysis; microfilament motor activity; monocyte differentiation; myosin complex; nucleus; platelet formation; protein anchor; protein homodimerization activity; protein transport; regulation of cell shape; ruffle; sensory perception of sound; stress fiber, tension |                                                                |
| 140 MYLK_HUMAN  | MYLK (MLCK)                       | Q15746            | Myosin light chain kinase, smooth muscle (MLCK) (EC 2.7.11.18) (Telokin) (Kinase-related protein) (KRP)                                                                                                             | ATP binding; calcium ion binding; calmodulin binding; magnesium ion binding; myosin light chain kinase activity; protein amino acid phosphorylation                                                                                                                                                                                                                                                                                                                                                                                                                                                                                                         | Protein kinase superfamily, CAMK Ser/Thr protein kinase family |
| 141 MYPT1_HUMAN | PPP1R12A (MBS) (MYPT1)            | O14974            | Protein phosphatase 1 regulatory subunit 12A (Myosin phosphatase-targeting subunit 1) (Myosin phosphatase target subunit 1) (Protein phosphatase myosin-binding subunit)                                            | cytoplasm; protein binding; signal transducer activity                                                                                                                                                                                                                                                                                                                                                                                                                                                                                                                                                                                                      |                                                                |
| 142 NAAA_HUMAN  | NAAA (ASAH) (PLT)                 | Q02083            | N-acyl ethanolamine-hydrolyzing acid amidase (EC 3.5.1.-) (N-acylsphingosine amidohydrolase-like) (ASAH-like protein) (Acid ceramidase-like protein)                                                                | hydrolase activity; lipid metabolic process; lysosome                                                                                                                                                                                                                                                                                                                                                                                                                                                                                                                                                                                                       | Acid ceramidase family                                         |
| 143 NBEL2_HUMAN | NBEAL2 (KIAA0540) (UNQ253/PRO290) | Q6ZJN1            | Neurobeachin-like protein 2                                                                                                                                                                                         | binding                                                                                                                                                                                                                                                                                                                                                                                                                                                                                                                                                                                                                                                     | WD repeat neurobeachin family                                  |
| 144 NEB2_HUMAN  | PPP1R9B (PPP1R6)                  | Q96SB3            | Neurabin-2 (Neurabin-II) (Spinophilin) (Protein phosphatase 1 regulatory subunit 9B)                                                                                                                                | RNA splicing; actin binding; cell cycle arrest; cell differentiation; cell junction; cytoskeleton; dendritic spine; negative regulation of cell growth; nervous system development; nucleoplasm; phosphoprotein phosphatase inhibitor activity; protein phosphatase 1 binding; protein phosphatase type 1 complex; regulation of cell growth by extracellular stimulus; regulation of cell proliferation; regulation of exit from mitosis; synapse                                                                                                                                                                                                          |                                                                |
| 145 NEXN_HUMAN  | NEXN                              | Q0ZGT2            | Nexilin (F-actin binding protein) (Nelin)                                                                                                                                                                           | actin filament binding; cell-substrate adherens junction; cytoplasm; cytoskeleton; regulation of cell migration; regulation of cytoskeleton organization                                                                                                                                                                                                                                                                                                                                                                                                                                                                                                    |                                                                |

| Entry name      | Gene names                         | Uniprot Accession | Protein names                                                                                                                                                                                                                                                            | Gene Ontology                                                                                                                                                                                                                                                                                                                           | Protein family                                                                 |
|-----------------|------------------------------------|-------------------|--------------------------------------------------------------------------------------------------------------------------------------------------------------------------------------------------------------------------------------------------------------------------|-----------------------------------------------------------------------------------------------------------------------------------------------------------------------------------------------------------------------------------------------------------------------------------------------------------------------------------------|--------------------------------------------------------------------------------|
| 146 NFAC1_HUMAN | NFATC1 (NFAT2) (NFATC)             | O95644            | Nuclear factor of activated T-cells, cytoplasmic 1 (NF-ATc1) (NFAT transcription complex cytosolic component) (NF-ATc) (NFATc)                                                                                                                                           | FK506 binding; cytoplasm; intracellular signaling cascade; nucleus; regulation of transcription, DNA-dependent; transcription activator activity; transcription factor activity; transcription from RNA polymerase II promoter                                                                                                          |                                                                                |
| 147 NHRF1_HUMAN | SLC9A3R1 (NHERF) (NHERF1)          | O14745            | Na(+)/H(+) exchange regulatory cofactor NHERF1 (NHERF-1) (Ezrin-radixin-moesin-binding phosphoprotein 50) (EBP50) (Regulatory cofactor of Na(+)/H(+) exchanger) (Sodium-hydrogen exchanger regulatory factor 1) (Solute carrier family 9 isoform A3 regulatory factor 1) | PDZ domain binding; Wnt receptor signaling pathway; actin cytoskeleton; beta-2 adrenergic receptor binding; endomembrane system; filopodium; microvillus; protein complex assembly; regulation of sodium:hydrogen antiporter activity; ruffle                                                                                           |                                                                                |
| 148 NP1L1_HUMAN | NAP1L1 (NRP)                       | P55209            | Nucleosome assembly protein 1-like 1 (NAP-1-related protein) (hNRP)                                                                                                                                                                                                      | DNA replication; chromatin assembly complex; melanosome; nucleosome assembly; positive regulation of cell proliferation; protein binding                                                                                                                                                                                                | Nucleosome assembly protein (NAP) family                                       |
| 149 NP1L4_HUMAN | NAP1L4 (NAP2)                      | Q99733            | Nucleosome assembly protein 1-like 4 (Nucleosome assembly protein 2) (NAP2)                                                                                                                                                                                              | chromatin assembly complex; cytoplasm; nucleosome assembly; unfolded protein binding                                                                                                                                                                                                                                                    | Nucleosome assembly protein (NAP) family                                       |
| 150 NSF1C_HUMAN | NSFL1C (UBXN2C)                    | Q9UNZ2            | NSFL1 cofactor p47 (p97 cofactor p47) (UBX domain-containing protein 2C)                                                                                                                                                                                                 | Golgi stack; lipid binding; nucleus; protein binding                                                                                                                                                                                                                                                                                    | NSFL1C family                                                                  |
| 151 ODP A_HUMAN | PDHA1 (PHE1A)                      | P08559            | Pyruvate dehydrogenase E1 component subunit alpha, somatic form, mitochondrial (EC 1.2.4.1) (PDHE1-A type 1)                                                                                                                                                             | glycolysis; mitochondrial matrix; oxidation reduction; protein binding; pyruvate dehydrogenase (acetyl-transferring) activity                                                                                                                                                                                                           |                                                                                |
| 152 OSTF1_HUMAN | OSTF1                              | Q92882            | Osteoclast-stimulating factor 1                                                                                                                                                                                                                                          | cytoplasm; identical protein binding; ossification; signal transduction                                                                                                                                                                                                                                                                 |                                                                                |
| 153 PA24A_HUMAN | PLA2G4A (CPLA2) (PLA2G4)           | P47712            | Cytosolic phospholipase A2 (cPLA2) (Phospholipase A2 group IVA) [Includes: Phospholipase A2 (EC 3.1.1.4) (Phosphatidylcholine 2-acylhydrolase); Lysophospholipase (EC 3.1.1.5)]                                                                                          | calcium ion binding; cytoplasmic vesicle; cytosol; icosanoid metabolic process; integral to membrane; lysophospholipase activity; phospholipase A2 activity; phospholipid catabolic process; platelet activating factor biosynthetic process                                                                                            |                                                                                |
| 154 PAK2_HUMAN  | PAK2                               | Q13177            | Serine/threonine-protein kinase PAK 2 (EC 2.7.11.1) (p21-activated kinase 2) (PAK-2) (Gamma-PAK) (PAK65) (S6/H4 kinase) (p58) [Cleaved into: PAK-2p27 (p27); PAK-2p34 (p34) (C-t-PAK2)]                                                                                  | ATP binding; apoptosis; cytosol; identical protein binding; interspecies interaction between organisms; membrane; negative regulation of protein kinase activity; nucleus; perinuclear region of cytoplasm; protein amino acid autophosphorylation; protein serine/threonine kinase activity; regulation of growth; signal transduction | Protein kinase superfamily, STE Ser/Thr protein kinase family, STE20 subfamily |
| 155 PARD3_HUMAN | PARD3 (PAR3) (PAR3A)               | Q8TEW0            | Partitioning defective 3 homolog (PARD-3) (PAR-3) (Atypical PKC isotype-specific-interacting protein) (ASIP) (CTCL tumor antigen se2-5) (PAR3-alpha)                                                                                                                     | activation of protein kinase C activity by G-protein coupled receptor protein signaling pathway; asymmetric cell division; axonogenesis; cell cortex; cell cycle; endomembrane system; establishment or maintenance of cell polarity; protein binding; protein complex assembly; tight junction                                         | PAR3 family                                                                    |
| 156 PARVB_HUMAN | PARVB (CGI-56)                     | Q9HBI1            | Beta-parvin (Affixin)                                                                                                                                                                                                                                                    | actin binding; cell adhesion; cytoplasm; cytoskeleton; focal adhesion                                                                                                                                                                                                                                                                   | Parvin family                                                                  |
| 157 PDLI1_HUMAN | PDLIM1 (CLIM1) (CLP36)             | O00151            | PDZ and LIM domain protein 1 (Elfin) (LIM domain protein CLP-36) (C-terminal LIM domain protein 1)                                                                                                                                                                       | cytoplasm; cytoskeleton; response to oxidative stress; zinc ion binding                                                                                                                                                                                                                                                                 |                                                                                |
| 158 PDLI5_HUMAN | PDLIM5 (ENH) (L9)                  | Q96HC4            | PDZ and LIM domain protein 5 (Enigma homolog) (Enigma-like PDZ and LIM domains protein)                                                                                                                                                                                  | actin binding; actin cytoskeleton; actinin binding; cytosol; membrane fraction; protein kinase C binding; zinc ion binding                                                                                                                                                                                                              |                                                                                |
| 159 PEAR1_HUMAN | PEAR1 (MEGF12)                     | Q5VY43            | Platelet endothelial aggregation receptor 1 (hPEAR1) (Multiple epidermal growth factor-like domains 12) (Multiple EGF-like-domains 12)                                                                                                                                   | integral to membrane; plasma membrane                                                                                                                                                                                                                                                                                                   | MEGF family                                                                    |
| 160 PGK1_HUMAN  | PGK1 (PGKA) (MIG10) (OK/SW-cl.110) | P00558            | Phosphoglycerate kinase 1 (EC 2.7.2.3) (Primer recognition protein 2) (PRP 2) (Cell migration-inducing gene 10 protein)                                                                                                                                                  | ATP binding; cytoplasm; glycolysis; phosphoglycerate kinase activity; phosphorylation                                                                                                                                                                                                                                                   | Phosphoglycerate kinase family                                                 |
| 161 PGM2L_HUMAN | PGM2L1 (BM32A)                     | Q6PCE3            | Glucose 1,6-bisphosphate synthase (EC 2.7.1.106) (Phosphoglucomutase-2-like 1) (PMMLP)                                                                                                                                                                                   | glucose metabolic process; glucose-1,6-bisphosphate synthase activity; intramolecular transferase activity; phosphotransferases                                                                                                                                                                                                         | Phosphohexose mutase family                                                    |
| 162 PGRC1_HUMAN | PGRMC1 (HPR6.6) (PGRMC)            | O00264            | Membrane-associated progesterone receptor component 1 (mPR)                                                                                                                                                                                                              | cell surface; endoplasmic reticulum membrane; heme binding; integral to plasma membrane; microsome; nucleolus; protein binding; receptor activity: steroid binding                                                                                                                                                                      | Cytochrome b5 family, MAPR subfamily                                           |

| Entry name | Gene names  | Uniprot Accession          | Protein names | Gene Ontology                                                                                                                                                                                              | Protein family                                                                                                                                                                                                                                                                                                                                                                                                                                                                                                                                                                                                                                                                                                                                                                                                                                                                                                                                                                                                                                       |                                                                     |
|------------|-------------|----------------------------|---------------|------------------------------------------------------------------------------------------------------------------------------------------------------------------------------------------------------------|------------------------------------------------------------------------------------------------------------------------------------------------------------------------------------------------------------------------------------------------------------------------------------------------------------------------------------------------------------------------------------------------------------------------------------------------------------------------------------------------------------------------------------------------------------------------------------------------------------------------------------------------------------------------------------------------------------------------------------------------------------------------------------------------------------------------------------------------------------------------------------------------------------------------------------------------------------------------------------------------------------------------------------------------------|---------------------------------------------------------------------|
| 163        | PGRC2_HUMAN | PGRMC2 (DG6) (PMBP)        | O15173        | Membrane-associated progesterone receptor component 2 (Progesterone membrane-binding protein) (Steroid receptor protein DG6)                                                                               | heme binding; integral to membrane; steroid binding; steroid hormone receptor activity                                                                                                                                                                                                                                                                                                                                                                                                                                                                                                                                                                                                                                                                                                                                                                                                                                                                                                                                                               | Cytochrome b5 family, MAPR subfamily                                |
| 164        | PIWL3_HUMAN | PIWL3                      | Q7Z3Z3        | Piwi-like protein 3                                                                                                                                                                                        | RNA binding; cell differentiation; cytoplasm; gene silencing by RNA; meiosis; multicellular organismal development; regulation of translation; spermatogenesis                                                                                                                                                                                                                                                                                                                                                                                                                                                                                                                                                                                                                                                                                                                                                                                                                                                                                       | Argonaute family, Piwi subfamily                                    |
| 165        | PKHO2_HUMAN | PLEKH02 (PLEKHQ1) (PP9099) | Q8TD55        | Pleckstrin homology domain-containing family O member 2 (Pleckstrin homology domain-containing family O member 1)                                                                                          |                                                                                                                                                                                                                                                                                                                                                                                                                                                                                                                                                                                                                                                                                                                                                                                                                                                                                                                                                                                                                                                      |                                                                     |
| 166        | PLEC1_HUMAN | PLEC1                      | Q15149        | Plectin-1 (PLTN) (PCN) (Hemidesmosomal protein 1) (HD1)                                                                                                                                                    | actin binding; cytoplasm; cytoskeleton; plasma membrane; structural constituent of muscle actin cytoskeleton reorganization; cortical actin cytoskeleton organization; cytoplasm; hemopoietic progenitor cell differentiation; inhibition of phospholipase C activity involved in G-protein coupled receptor signaling pathway; integrin-mediated signaling pathway; membrane fraction; negative regulation of calcium-mediated signaling; negative regulation of inositol phosphate biosynthetic process; phosphate binding; phosphatidylinositol-3,4-bisphosphate binding; phosphoinositide metabolic process; platelet aggregation; positive regulation of actin filament bundle formation; positive regulation of actin filament depolymerization; positive regulation of inositol-polyphosphate 5-phosphatase activity; positive regulation of integrin activation; positive regulation of platelet activation; protein homodimerization activity; protein kinase C binding; protein kinase C signaling cascade: protein secretion by cytoplasm | Plakin or cytolinker family                                         |
| 167        | PLEK_HUMAN  | PLEK (P47)                 | P08567        | Pleckstrin (Platelet p47 protein)                                                                                                                                                                          |                                                                                                                                                                                                                                                                                                                                                                                                                                                                                                                                                                                                                                                                                                                                                                                                                                                                                                                                                                                                                                                      |                                                                     |
| 168        | PP12C_HUMAN | PPP1R12C (LENG3) (MBS85)   | Q9BZL4        | Protein phosphatase 1 regulatory subunit 12C (Protein phosphatase 1 myosin-binding subunit of 85 kDa) (Protein phosphatase 1 myosin-binding subunit p85)                                                   |                                                                                                                                                                                                                                                                                                                                                                                                                                                                                                                                                                                                                                                                                                                                                                                                                                                                                                                                                                                                                                                      |                                                                     |
| 169        | PP14A_HUMAN | PPP1R14A (CPI17) (PPP1INL) | Q96A00        | Protein phosphatase 1 regulatory subunit 14A (17 kDa PKC-potentiated inhibitory protein of PP1) (CPI-17)                                                                                                   | cytoplasm; phosphoprotein phosphatase inhibitor activity; protein binding; regulation of phosphorylation                                                                                                                                                                                                                                                                                                                                                                                                                                                                                                                                                                                                                                                                                                                                                                                                                                                                                                                                             | PP1 inhibitor family                                                |
| 170        | PPR3E_HUMAN | PPP1R3E                    | Q9H7J1        | Protein phosphatase 1 regulatory subunit 3E                                                                                                                                                                | glycogen metabolic process                                                                                                                                                                                                                                                                                                                                                                                                                                                                                                                                                                                                                                                                                                                                                                                                                                                                                                                                                                                                                           |                                                                     |
| 171        | PSA3_HUMAN  | PSMA3 (PSC8)               | P25788        | Proteasome subunit alpha type-3 (EC 3.4.25.1) (Proteasome component C8) (Macropain subunit C8) (Multicatalytic endopeptidase complex subunit C8)                                                           | anaphase-promoting complex-dependent proteasomal ubiquitin-dependent protein catabolic process; cytoskeleton; cytosol; negative regulation of ubiquitin-protein ligase activity during mitotic cell cycle; nucleus; positive regulation of ubiquitin-protein ligase activity during mitotic cell cycle; proteasome core complex; protein binding; threonine-type endopeptidase activity                                                                                                                                                                                                                                                                                                                                                                                                                                                                                                                                                                                                                                                              | Peptidase T1A family                                                |
| 172        | PTN12_HUMAN | PTPN12                     | Q05209        | Tyrosine-protein phosphatase non-receptor type 12 (EC 3.1.3.48) (Protein-tyrosine phosphatase G1) (PTPG1) (PTP-PEST)                                                                                       | SH3 domain binding; non-membrane spanning protein tyrosine phosphatase activity; protein amino acid dephosphorylation; soluble fraction                                                                                                                                                                                                                                                                                                                                                                                                                                                                                                                                                                                                                                                                                                                                                                                                                                                                                                              | Protein-tyrosine phosphatase family, Non-receptor class 4 subfamily |
| 173        | PTN6_HUMAN  | PTPN6 (HCP) (PTP1C)        | P29350        | Tyrosine-protein phosphatase non-receptor type 6 (EC 3.1.3.48) (Protein-tyrosine phosphatase 1C) (PTP-1C) (Hematopoietic cell protein-tyrosine phosphatase) (SH-PTP1) (Protein-tyrosine phosphatase SHP-1) | G-protein coupled receptor protein signaling pathway; apoptosis; cytosol; membrane; nucleus; protein amino acid dephosphorylation; protein binding; protein tyrosine phosphatase activity                                                                                                                                                                                                                                                                                                                                                                                                                                                                                                                                                                                                                                                                                                                                                                                                                                                            | Protein-tyrosine phosphatase family, Non-receptor class 2 subfamily |
| 174        | PTPRA_HUMAN | PTPRA (PTPA) (PTPRL2)      | P18433        | Receptor-type tyrosine-protein phosphatase alpha (Protein-tyrosine phosphatase alpha) (R-PTP-alpha) (EC 3.1.3.48)                                                                                          | integral to plasma membrane; protein amino acid dephosphorylation; protein amino acid phosphorylation; transmembrane receptor protein tyrosine phosphatase activity                                                                                                                                                                                                                                                                                                                                                                                                                                                                                                                                                                                                                                                                                                                                                                                                                                                                                  | Protein-tyrosine phosphatase family, Receptor class 4 subfamily     |

| Entry name      | Gene names                              | Uniprot Accession | Protein names                                                                                                                                                                                                                                                                                          | Gene Ontology                                                                                                                                                                                                                                                                                                            | Protein family                       |
|-----------------|-----------------------------------------|-------------------|--------------------------------------------------------------------------------------------------------------------------------------------------------------------------------------------------------------------------------------------------------------------------------------------------------|--------------------------------------------------------------------------------------------------------------------------------------------------------------------------------------------------------------------------------------------------------------------------------------------------------------------------|--------------------------------------|
| 175 PURA_HUMAN  | PURA (PUR1)                             | Q00577            | Transcriptional activator protein Pur-alpha (Purine-rich single-stranded DNA-binding protein alpha)                                                                                                                                                                                                    | DNA replication factor A complex; DNA replication initiation; DNA unwinding during replication; RNA polymerase II transcription factor activity, enhancer binding; double-stranded telomeric DNA binding; nuclear chromosome, telomeric region; single-stranded DNA binding; transcription; transcription factor binding | PUR DNA-binding protein family       |
| 176 PURB_HUMAN  | PURB                                    | Q96QR8            | Transcriptional activator protein Pur-beta (Purine-rich element-binding protein B)                                                                                                                                                                                                                     | DNA replication factor A complex; mRNA binding; regulation of myeloid cell differentiation; single-stranded DNA binding; transcription; transcription factor binding                                                                                                                                                     | PUR DNA-binding protein family       |
| 177 PXDC2_HUMAN | PLXDC2 (TEM7R) (UNQ2514/PRO6003)        | Q6UX71            | Plexin domain-containing protein 2 (Tumor endothelial marker 7-related protein)                                                                                                                                                                                                                        | integral to membrane                                                                                                                                                                                                                                                                                                     | Plexin family                        |
| 178 RAB7A_HUMAN | RAB7A (RAB7)                            | P51149            | Ras-related protein Rab-7a                                                                                                                                                                                                                                                                             | GTP binding; GTPase activity; Golgi apparatus; endocytosis; late endosome; lysosome; melanosome; phagocytic vesicle; protein binding; protein transport; small GTPase mediated signal transduction                                                                                                                       | Small GTPase superfamily, Rab family |
| 179 RGC32_HUMAN | RGC32 (C13orf15)                        | Q9H4X1            | Response gene to complement 32 protein (RGC-32)                                                                                                                                                                                                                                                        | cell cycle; centrosome; nucleus; regulation of cyclin-dependent protein kinase activity                                                                                                                                                                                                                                  |                                      |
| 180 RGS18_HUMAN | RGS18 (RGS13)                           | Q9NS28            | Regulator of G-protein signaling 18 (RGS18)                                                                                                                                                                                                                                                            | cytoplasm; negative regulation of signal transduction; signal transducer activity                                                                                                                                                                                                                                        |                                      |
| 181 RHDF2_HUMAN | RHDF2 (RHBDL5) (RHBDL6)                 | Q6PJF5            | Rhomboid family member 2 (Rhomboid 5 homolog 2) (Rhomboid veinlet-like protein 5) (Rhomboid veinlet-like protein 6)                                                                                                                                                                                    | endoplasmic reticulum membrane; integral to membrane                                                                                                                                                                                                                                                                     | Peptidase S54 family                 |
| 182 RHG01_HUMAN | ARHGAP1 (CDC42GAP) (RHOGAP1)            | Q07960            | Rho GTPase-activating protein 1 (Rho-type GTPase-activating protein 1) (Rho-related small GTPase protein activator) (GTPase-activating protein rhoOGAP) (p50-RhoGAP) (CDC42 GTPase-activating protein)                                                                                                 | Rho protein signal transduction; SH3 domain binding; SH3/SH2 adaptor activity; cytoplasm; intracellular membrane-bounded organelle                                                                                                                                                                                       |                                      |
| 183 RHG06_HUMAN | ARHGAP6 (RHOGAP6)                       | O43182            | Rho GTPase-activating protein 6 (Rho-type GTPase-activating protein 6) (Rho-type GTPase-activating protein RhoGAPX-1)                                                                                                                                                                                  | Rho GTPase activator activity; Rho protein signal transduction; SH3 domain binding; SH3/SH2 adaptor activity; actin filament; actin filament polymerization; cytoplasm; negative regulation of focal adhesion formation; negative regulation of stress fiber formation; regulation of GTPase activity                    |                                      |
| 184 RHG17_HUMAN | ARHGAP17 (RICH1) (MSTP066) (MSTP110)    | Q68EM7            | Rho GTPase-activating protein 17 (Rho-type GTPase-activating protein 17) (RhoGAP interacting with CIP4 homologs protein 1) (RICH-1)                                                                                                                                                                    | GTPase activator activity; SH3 domain binding; cytoplasm; signal transduction; tight junction                                                                                                                                                                                                                            |                                      |
| 185 RHG18_HUMAN | ARHGAP18                                | Q8N392            | Rho GTPase-activating protein 18 (Rho-type GTPase-activating protein 18) (MacGAP)                                                                                                                                                                                                                      | GTPase activator activity; intracellular; protein binding; signal transduction                                                                                                                                                                                                                                           |                                      |
| 186 RICS_HUMAN  | RICS (GRIT) (KIAA0712)                  | A7KAX9            | Rho/Cdc42/Rac GTPase-activating protein RICS (p200RhoGAP) (p250GAP) (RhoGAP involved in the beta-catenin-N-cadherin and NMDA receptor signaling) (Brain-specific Rho GTPase-activating protein) (GAB-associated Cdc42/Rac GTPase-activating protein) (GC-GAP) (GTPase regulator interacting with TrkA) | GTPase activator activity; Golgi membrane; cell cortex; cell junction; dendritic spine; endoplasmic reticulum membrane; endosome membrane; phosphoinositide binding; postsynaptic density; postsynaptic membrane; protein binding; signal transduction                                                                   | PX domain-containing GAP family      |
| 187 RLA1_HUMAN  | RPLP1 (RRP1)                            | P05386            | 60S acidic ribosomal protein P1                                                                                                                                                                                                                                                                        | RNA binding; cytosolic large ribosomal subunit; protein binding; structural constituent of ribosome; translational elongation                                                                                                                                                                                            | Ribosomal protein L12P family        |
| 188 RPGP2_HUMAN | GARNL4 (KIAA1039) (RAP1GA2)             | Q684P5            | Rap1 GTPase-activating protein 2 (Rap1GAP2) (GTPase-activating Rap/Ran-GAP domain-like protein 4)                                                                                                                                                                                                      | GTPase activator activity; perinuclear region of cytoplasm; regulation of small GTPase mediated signal transduction                                                                                                                                                                                                      |                                      |
| 189 RTN1_HUMAN  | RTN1 (NSP)                              | Q16799            | Reticulon-1 (Neuroendocrine-specific protein)                                                                                                                                                                                                                                                          | integral to endoplasmic reticulum membrane; neuron differentiation; signal transducer activity; signal transduction                                                                                                                                                                                                      |                                      |
| 190 RTN4_HUMAN  | RTN4 (KIAA0886) (NOGO) (My043) (SP1507) | Q9NQC3            | Reticulon-4 (Neurite outgrowth inhibitor) (Nogo protein) (Foccen) (Neuroendocrine-specific protein) (NSP) (Neuroendocrine-specific protein C homolog) (RTN-x) (Reticulon-5)                                                                                                                            | apoptosis; integral to endoplasmic reticulum membrane; negative regulation of anti-apoptosis; negative regulation of axon extension; nuclear envelope; protein binding; regulation of apoptosis; regulation of cell migration                                                                                            |                                      |
| 191 S39A9_HUMAN | SLC39A9 (ZIP9) (UNQ714/PRO1377)         | Q9NUM3            | Zinc transporter ZIP9 (Zrt- and Irt-like protein 9) (ZIP-9) (Solute carrier family 39 member 9)                                                                                                                                                                                                        | Golgi apparatus; integral to membrane; metal ion transmembrane transporter activity; nucleolus; zinc ion binding; zinc ion transport                                                                                                                                                                                     | ZIP transporter (TC 2.A.5) family    |
| 192 SAM14_HUMAN | SAMD14                                  | Q8IZD0            | Sterile alpha motif domain-containing protein 14                                                                                                                                                                                                                                                       |                                                                                                                                                                                                                                                                                                                          |                                      |

| Entry name      | Gene names                                   | Uniprot Accession | Protein names                                                                                                                                                                                                                                                                                                  | Gene Ontology                                                                                                                                                                                              | Protein family                                                                 |
|-----------------|----------------------------------------------|-------------------|----------------------------------------------------------------------------------------------------------------------------------------------------------------------------------------------------------------------------------------------------------------------------------------------------------------|------------------------------------------------------------------------------------------------------------------------------------------------------------------------------------------------------------|--------------------------------------------------------------------------------|
| 193 SCAM2_HUMAN | SCAMP2                                       | O15127            | Secretory carrier-associated membrane protein 2 (Secretory carrier membrane protein 2)                                                                                                                                                                                                                         | integral to membrane; post-Golgi vesicle-mediated transport; protein binding; protein transport; recycling endosome membrane; trans-Golgi network membrane                                                 | SCAMP family                                                                   |
| 194 SDPR_HUMAN  | SDPR                                         | O95810            | Serum deprivation-response protein (Phosphatidylserine-binding protein) (PS-p68)                                                                                                                                                                                                                               | caveola; cytosol; phosphatidylserine binding; protein binding                                                                                                                                              | PTRF/SDPR family                                                               |
| 195 SEPT2_HUMAN | SEPT2 (DIFF6) (KIAA0158) (NEDD5)             | Q15019            | Septin-2 (Neural precursor cell expressed developmentally down-regulated protein 5) (NEDD-5)                                                                                                                                                                                                                   | GTP binding; cell division; mitosis; nucleus; protein binding; septin complex; spindle                                                                                                                     | Septin family                                                                  |
| 196 SEPT5_HUMAN | SEPT5 (PNU TL1)                              | Q99719            | Septin-5 (Peanut-like protein 1) (Cell division control-related protein 1) (CDCrel-1)                                                                                                                                                                                                                          | GTP binding; GTPase activity; cell cycle; cytokinesis; plasma membrane; septin complex; structural molecule activity; synaptic vesicle; synaptic vesicle targeting                                         | Septin family                                                                  |
| 197 SEPT6_HUMAN | SEPT6 (KIAA0128) (SEP2)                      | Q14141            | Septin-6                                                                                                                                                                                                                                                                                                       | GTP binding; cell cycle; cytokinesis; nucleus; protein binding; septin complex                                                                                                                             | Septin family                                                                  |
| 198 SEPT7_HUMAN | SEPT7 (CDC10)                                | Q16181            | Septin-7 (CDC10 protein homolog)                                                                                                                                                                                                                                                                               | GTP binding; condensed chromosome kinetochore; cytokinesis; mitosis; nucleus; protein binding; protein heterooligomerization; septin complex; spindle; stress fiber; structural molecule activity          | Septin family                                                                  |
| 199 SFR19_HUMAN | SCAF1 (SFRS19) (SRA1)                        | Q9H7N4            | Splicing factor, arginine/serine-rich 19 (Serine arginine-rich pre-mRNA splicing factor SR-A1) (SR-A1) (SR-related-CTD-associated factor) (SCAF)                                                                                                                                                               | RNA binding; RNA splicing; mRNA processing; nucleus                                                                                                                                                        | Splicing factor SR family                                                      |
| 200 SKA2_HUMAN  | FAM33A (SKA2)                                | Q8WVK7            | Spindle and kinetochore-associated protein 2 (Protein FAM33A)                                                                                                                                                                                                                                                  | cell division; chromosome segregation; microtubule binding; mitotic anaphase; outer kinetochore of condensed chromosome; regulation of microtubule polymerization or depolymerization; spindle microtubule | SKA2 family                                                                    |
| 201 SKAP2_HUMAN | SKAP2 (PRAP) (RA70) (SAPS) (SCAP2) (SKAP55R) | O75563            | Src kinase-associated phosphoprotein 2 (Src family-associated phosphoprotein 2) (Src kinase-associated phosphoprotein 55-related protein) (SKAP55 homolog) (SKAP-55HOM) (SKAP-HOM) (Src-associated adapter protein with PH and SH3 domains) (Pyk2/RAFTK-associated protein) (Retinoic acid-induced protein 70) | B cell activation; SH3/SH2 adaptor activity; cytoplasm; plasma membrane; protein complex assembly; signal transduction                                                                                     | SKAP family                                                                    |
| 202 SKIV2_HUMAN | SKIV2L (DDX13) (SKI2W) (SKIV2) (W)           | Q15477            | Helicase SKI2W (EC 3.6.1.-) (Helicase-like protein) (HLP)                                                                                                                                                                                                                                                      | ATP binding; ATP-dependent RNA helicase activity; RNA binding; nucleus; protein binding                                                                                                                    | Helicase family, SKI2 subfamily                                                |
| 203 SL9A1_HUMAN | SLC9A1 (APNH1) (NHE1)                        | P19634            | Sodium/hydrogen exchanger 1 (Na(+)/H(+) exchanger 1) (NHE-1) (Solute carrier family 9 member 1) (Na(+)/H(+) antiporter, amiloride-sensitive) (APNH)                                                                                                                                                            | integral to membrane; late endosome membrane; recycling endosome; regulation of pH; sodium ion binding; sodium ion transport                                                                               | Monovalent cation:proton antiporter 1 (CPA1) transporter (TC 2.A.36) family    |
| 204 SL9A9_HUMAN | SLC9A9 (NHE9) (Nbla00118)                    | Q8IVB4            | Sodium/hydrogen exchanger 9 (Na(+)/H(+) exchanger 9) (NHE-9) (Solute carrier family 9 member 9)                                                                                                                                                                                                                | integral to membrane; late endosome membrane; recycling endosome; regulation of pH; sodium ion binding; sodium ion transport; sodium:hydrogen antiporter activity                                          | Monovalent cation:proton antiporter 1 (CPA1) transporter (TC 2.A.36) family    |
| 205 SLAI2_HUMAN | SLAIN2 (KIAA1458)                            | Q9P270            | SLAIN motif-containing protein 2                                                                                                                                                                                                                                                                               |                                                                                                                                                                                                            | SLAIN motif-containing family                                                  |
| 206 SLK_HUMAN   | SLK (KIAA0204) (STK2)                        | Q9H2G2            | STE20-like serine/threonine-protein kinase (STE20-like kinase) (hSLK) (EC 2.7.11.1) (STE20-related serine/threonine-protein kinase) (STE20-related kinase) (Serine/threonine-protein kinase 2) (CTCL tumor antigen se20-9)                                                                                     | ATP binding; DNA binding; apoptosis; cytoplasm; nuclease activity; nucleotide-excision repair; protein amino acid phosphorylation; protein serine/threonine kinase activity                                | Protein kinase superfamily, STE Ser/Thr protein kinase family, STE20 subfamily |
| 207 SNTB1_HUMAN | SNTB1 (SNT2B1)                               | Q13884            | Beta-1-syntrophin (59 kDa dystrophin-associated protein A1 basic component 1) (DAPA1B) (Tax interaction protein 43) (TIP-43) (Syntrophin-2) (BSYN2)                                                                                                                                                            | actin binding; calcium ion binding; calmodulin binding; cell junction; cytoplasm; cytoskeleton; dystrophin-associated glycoprotein complex; muscle contraction; sarcolemma                                 | Syntrophin family                                                              |
| 208 SPAG1_HUMAN | SPAG1                                        | Q07617            | Sperm-associated antigen 1 (Infertility-related sperm protein Spag-1) (HSD-3.8)                                                                                                                                                                                                                                | GTP binding; cytoplasm; hydrolase activity; single fertilization                                                                                                                                           |                                                                                |
| 209 SPTB2_HUMAN | SPTBN1 (SPTB2)                               | Q01082            | Spectrin beta chain, brain 1 (Spectrin, non-erythroid beta chain 1) (Beta-II spectrin) (Fodrin beta chain)                                                                                                                                                                                                     | M band; actin binding; barbed-end actin filament capping; calmodulin binding; nucleolus; plasma membrane; spectrin; structural constituent of cytoskeleton                                                 | Spectrin family                                                                |
| 210 SREC_HUMAN  | SCARF1 (KIAA0149) (SREC)                     | Q14162            | Endothelial cells scavenger receptor (Acetyl LDL receptor) (Scavenger receptor class F member 1)                                                                                                                                                                                                               | cell adhesion; cholesterol catabolic process; integral to membrane; low-density lipoprotein binding; receptor-mediated endocytosis; scavenger receptor activity                                            |                                                                                |

| Entry name | Gene names  | Uniprot Accession             | Protein names | Gene Ontology                                                                                                                                                                    | Protein family                                                                                                                                                                                                                          |                                     |
|------------|-------------|-------------------------------|---------------|----------------------------------------------------------------------------------------------------------------------------------------------------------------------------------|-----------------------------------------------------------------------------------------------------------------------------------------------------------------------------------------------------------------------------------------|-------------------------------------|
| 211        | STIM1_HUMAN | STIM1 (GOK)                   | Q13586        | Stromal interaction molecule 1                                                                                                                                                   | activation of store-operated calcium channel activity; calcium ion binding; calcium ion transport; detection of calcium ion; integral to endoplasmic reticulum membrane; integral to plasma membrane; protein binding                   |                                     |
| 212        | SYTL3_HUMAN | SYTL3 (SLP3)                  | Q4VX76        | Synaptotagmin-like protein 3 (Exophilin-6)                                                                                                                                       | Rab GTPase binding; endomembrane system; intracellular protein transport; membrane; zinc ion binding                                                                                                                                    |                                     |
| 213        | SYTL4_HUMAN | SYTL4                         | Q96C24        | Synaptotagmin-like protein 4 (Exophilin-2) (Granophilin)                                                                                                                         | Rab GTPase binding; exocytosis; extrinsic to membrane; intracellular protein transport; neurexin binding; phospholipid binding; plasma membrane; secretory granule membrane; synaptic vesicle; transporter activity; zinc ion binding   |                                     |
| 214        | T22D4_HUMAN | TSC22D4 (TILZ2)               | Q9Y3Q8        | TSC22 domain family protein 4 (TSC22-related inducible leucine zipper protein 2) (Tsc-22-like protein THG-1)                                                                     | cytoplasm; nucleus; protein binding; regulation of transcription, DNA-dependent; transcription; transcription factor activity; transcription repressor activity                                                                         | TSC-22/Dip/Bun family               |
| 215        | TA2R_HUMAN  | TBXA2R                        | P21731        | Thromboxane A2 receptor (TXA2-R) (Prostanoid TP receptor)                                                                                                                        | G-protein coupled receptor protein signaling pathway; integral to plasma membrane; thromboxane A2 receptor activity                                                                                                                     | G-protein coupled receptor 1 family |
| 216        | TAC2N_HUMAN | TC2N (C14orf47) (MTAC2D1)     | Q8N9U0        | Tandem C2 domains nuclear protein (Membrane targeting tandem C2 domain-containing protein 1) (Tandem C2 protein in nucleus) (Tac2-N)                                             | nucleus                                                                                                                                                                                                                                 |                                     |
| 217        | TAGL2_HUMAN | TAGLN2 (KIAA0120) (CDABP0035) | P37802        | Transgelin-2 (SM22-alpha homolog)                                                                                                                                                | cytoskeleton; muscle organ development; nuclear membrane; plasma membrane; protein binding                                                                                                                                              | Calponin family                     |
| 218        | TBA3C_HUMAN | TUBA3C (TUBA2); TUBA3D        | Q13748        | Tubulin alpha-3C/D chain (Alpha-tubulin 3C/D) (Tubulin alpha-2 chain) (Alpha-tubulin 2)                                                                                          | GTP binding; GTPase activity; microtubule; microtubule-based movement; protein binding; protein complex; protein polymerization; structural molecule activity                                                                           | Tubulin family                      |
| 219        | TBA4A_HUMAN | TUBA4A (TUBA1)                | P68366        | Tubulin alpha-4A chain (Tubulin alpha-1 chain) (Alpha-tubulin 1) (Testis-specific alpha-tubulin) (Tubulin H2-alpha)                                                              | GTP binding; GTPase activity; microtubule; microtubule-based movement; protein binding; protein complex; protein polymerization; structural molecule activity                                                                           | Tubulin family                      |
| 220        | TBB1_HUMAN  | TUBB1                         | Q9H4B7        | Tubulin beta-1 chain                                                                                                                                                             | GTP binding; GTPase activity; microtubule; microtubule-based movement; protein complex; protein polymerization                                                                                                                          | Tubulin family                      |
| 221        | TBB3_HUMAN  | TUBB3 (TUBB4)                 | Q13509        | Tubulin beta-3 chain (Tubulin beta-III) (Tubulin beta-4)                                                                                                                         | GTP binding; GTPase activity; microtubule; microtubule-based movement; protein complex; protein polymerization; structural molecule activity                                                                                            | Tubulin family                      |
| 222        | TBB4_HUMAN  | TUBB4 (TUBB5)                 | P04350        | Tubulin beta-4 chain (Tubulin 5 beta)                                                                                                                                            | GTP binding; GTPase activity; microtubule; microtubule-based movement; protein complex; protein polymerization; structural molecule activity                                                                                            | Tubulin family                      |
| 223        | TBB5_HUMAN  | TUBB (TUBB5) (OK/SW-cl.56)    | P07437        | Tubulin beta chain (Tubulin beta-5 chain)                                                                                                                                        | GTP binding; GTPase activity; MHC class I protein binding; cell motion; microtubule; microtubule-based movement; natural killer cell mediated cytotoxicity; protein polymerization                                                      | Tubulin family                      |
| 224        | TBB6_HUMAN  | TUBB6                         | Q9BUF5        | Tubulin beta-6 chain                                                                                                                                                             | GTP binding; GTPase activity; microtubule; microtubule-based movement; protein complex; protein polymerization; structural molecule activity                                                                                            | Tubulin family                      |
| 225        | TBB8_HUMAN  | TUBB8                         | Q3ZCM7        | Tubulin beta-8 chain                                                                                                                                                             | GTP binding; GTPase activity; microtubule; microtubule-based movement; protein complex; protein polymerization; structural molecule activity                                                                                            | Tubulin family                      |
| 226        | TEBP_HUMAN  | PTGES3 (P23) (TEBP)           | Q15185        | Prostaglandin E synthase 3 (EC 5.3.99.3) (Cytosolic prostaglandin E2 synthase) (cPGES) (Telomerase-binding protein p23) (Hsp90 co-chaperone) (Progesterone receptor complex p23) | chromosome, telomeric region; cytoplasm; prostaglandin biosynthetic process; prostaglandin-E synthase activity; signal transduction; telomerase activity; telomerase holoenzyme complex; telomere maintenance; unfolded protein binding | P23/wos2 family                     |
| 227        | TENS1_HUMAN | TNS1 (TNS)                    | Q9HBL0        | Tensin-1                                                                                                                                                                         | actin binding; cytoplasm; cytoskeleton; focal adhesion                                                                                                                                                                                  |                                     |



| Entry name | Gene names                                                           | Uniprot Accession | Protein names                                                                                                                                                         | Gene Ontology                                                                                                                                                                                                                                                                                                                                                                                                                                                                                                                                                                                                                                                                                            | Protein family                                                                 |
|------------|----------------------------------------------------------------------|-------------------|-----------------------------------------------------------------------------------------------------------------------------------------------------------------------|----------------------------------------------------------------------------------------------------------------------------------------------------------------------------------------------------------------------------------------------------------------------------------------------------------------------------------------------------------------------------------------------------------------------------------------------------------------------------------------------------------------------------------------------------------------------------------------------------------------------------------------------------------------------------------------------------------|--------------------------------------------------------------------------------|
| 228        | TGFI1_HUMAN<br>TGFB1I1 (ARA55)                                       | O43294            | Transforming growth factor beta-1-induced transcript 1 protein (Hydrogen peroxide-inducible clone 5 protein) (Hic-5) (Androgen receptor-associated protein of 55 kDa) | I-SMAD binding; Wnt receptor signaling pathway; androgen receptor binding; androgen receptor signaling pathway; cell adhesion; cell differentiation; cytoplasm; cytoskeleton; focal adhesion; negative regulation of cell proliferation; negative regulation of transforming growth factor beta receptor signaling pathway; nuclear matrix; positive regulation of epithelial to mesenchymal transition; positive regulation of transcription, DNA-dependent; positive regulation of transforming growth factor beta receptor signaling pathway; transcription coactivator activity; transcription from RNA polymerase II promoter; ubiquitin dependent SMAD protein catabolic process; zinc ion binding | Paxillin family                                                                |
| 229        | TJAP1_HUMAN<br>TJAP1 (PILT) (TJP4)                                   | Q5JTD0            | Tight junction-associated protein 1 (Tight junction protein 4) (Protein incorporated later into tight junctions)                                                      | Golgi apparatus; protein binding; tight junction                                                                                                                                                                                                                                                                                                                                                                                                                                                                                                                                                                                                                                                         |                                                                                |
| 230        | TLN1_HUMAN<br>TLN1 (KIAA1027) (TLN)                                  | Q9Y490            | Talin-1                                                                                                                                                               | LIM domain binding; actin binding; cell motion; cell-cell junction; cell-cell junction assembly; cytoplasm; cytoskeletal anchoring at plasma membrane; cytoskeleton; focal adhesion; intracellular membrane-bounded organelle; ruffle membrane; structural constituent of cytoskeleton; vinculin binding                                                                                                                                                                                                                                                                                                                                                                                                 |                                                                                |
| 231        | TMBI1_HUMAN<br>TMBIM1 (RECS1) (PP1201) (PSEC0158)                    | Q969X1            | Transmembrane BAX inhibitor motif-containing protein 1 (Protein RECS1 homoloq)                                                                                        | integral to membrane                                                                                                                                                                                                                                                                                                                                                                                                                                                                                                                                                                                                                                                                                     | BI1 family                                                                     |
| 232        | TMM40_HUMAN<br>TMEM40                                                | Q8WWA1            | Transmembrane protein 40                                                                                                                                              | integral to membrane                                                                                                                                                                                                                                                                                                                                                                                                                                                                                                                                                                                                                                                                                     |                                                                                |
| 233        | TMOD3_HUMAN<br>TMOD3                                                 | Q9NYL9            | Tropomodulin-3 (Ubiquitous tropomodulin) (U-Tmod)                                                                                                                     | actin binding; cytoplasm; cytoskeleton; tropomyosin binding                                                                                                                                                                                                                                                                                                                                                                                                                                                                                                                                                                                                                                              | Tropomodulin family                                                            |
| 234        | TMX1_HUMAN<br>TMX1 (TMX) (TXNDC) (TXNDC1) (PSEC0085) (UNQ235/PRO268) | Q9H3N1            | Thioredoxin-related transmembrane protein 1 (Thioredoxin domain-containing protein 1) (Transmembrane Trx-related protein)                                             | DNA replication; ER to Golgi vesicle-mediated transport; anti-apoptosis; arsenate reductase (thioredoxin) activity; cell proliferation; cell redox homeostasis; disulfide oxidoreductase activity; electron transport chain; endoplasmic reticulum membrane; integral to membrane; leukocyte activation; membrane fraction; nucleus; positive regulation of growth; positive regulation of transcription, DNA-dependent; response to stress; signal transduction                                                                                                                                                                                                                                         |                                                                                |
| 235        | TNIK_HUMAN<br>TNIK (KIAA0551)                                        | Q9UKES            | TRAF2 and NCK-interacting protein kinase (EC 2.7.11.1)                                                                                                                | ATP binding; JNK cascade; protein amino acid phosphorylation; protein binding; protein serine/threonine kinase activity; small GTPase regulator activity                                                                                                                                                                                                                                                                                                                                                                                                                                                                                                                                                 | Protein kinase superfamily, STE Ser/Thr protein kinase family, STE20 subfamily |
| 236        | TPC1_HUMAN<br>TPCN1 (KIAA1169) (TPC1)                                | Q9ULQ1            | Two pore calcium channel protein 1 (Voltage-dependent calcium channel protein TPC1)                                                                                   | calcium channel activity; calcium ion binding; calcium ion transport; integral to membrane; voltage-gated ion channel activity                                                                                                                                                                                                                                                                                                                                                                                                                                                                                                                                                                           | Calcium channel alpha-1 subunit (TC 1.A.1.11) family                           |
| 237        | TPM1_HUMAN<br>TPM1 (C15orf13) (TMSA)                                 | P09493            | Tropomyosin alpha-1 chain (Tropomyosin-1) (Alpha-tropomyosin)                                                                                                         | actin binding; bleb; cardiac muscle contraction; cell motion; cellular response to reactive oxygen species; muscle filament sliding; muscle thin filament tropomyosin; negative regulation of cell migration; positive regulation of ATPase activity; positive regulation of cell adhesion; positive regulation of heart rate by epinephrine; positive regulation of stress fiber formation; regulation of muscle contraction; ruffle membrane; ruffle organization; sarcomere organization; stress fiber; structural constituent of cytoskeleton; structural constituent of muscle; ventricular cardiac muscle morphogenesis; wound healing                                                             | Tropomyosin family                                                             |
| 238        | TRAD1_HUMAN<br>TRAFD1 (FLN29)                                        | O14545            | TRAF-type zinc finger domain-containing protein 1 (Protein FLN29)                                                                                                     | intracellular; protein binding; zinc ion binding                                                                                                                                                                                                                                                                                                                                                                                                                                                                                                                                                                                                                                                         |                                                                                |

| Entry name | Gene names  | Uniprot Accession             | Protein names | Gene Ontology                                                                                                                                                     | Protein family                                                                                                                                                                                                                                                                                                                                                                                                                                                                                                                                                                                                                                                                                                                                                                                                                                                                                                                                                                                                   |                                           |
|------------|-------------|-------------------------------|---------------|-------------------------------------------------------------------------------------------------------------------------------------------------------------------|------------------------------------------------------------------------------------------------------------------------------------------------------------------------------------------------------------------------------------------------------------------------------------------------------------------------------------------------------------------------------------------------------------------------------------------------------------------------------------------------------------------------------------------------------------------------------------------------------------------------------------------------------------------------------------------------------------------------------------------------------------------------------------------------------------------------------------------------------------------------------------------------------------------------------------------------------------------------------------------------------------------|-------------------------------------------|
| 239        | TRPC6_HUMAN | TRPC6 (TRP6)                  | Q9Y210        | Short transient receptor potential channel 6 (TrpC6)                                                                                                              | calcium ion binding; calcium ion transport; integral to membrane; plasma membrane; protein binding                                                                                                                                                                                                                                                                                                                                                                                                                                                                                                                                                                                                                                                                                                                                                                                                                                                                                                               | Transient receptor family, STpC subfamily |
| 240        | TSP1_HUMAN  | THBS1 (TSP) (TSP1)            | P07996        | Thrombospondin-1                                                                                                                                                  | activation of MAPK activity; anti-apoptosis; calcium ion binding; cell adhesion; cell cycle arrest; cell migration; cellular response to heat; chronic inflammatory response; collagen V binding; engulfment of apoptotic cell; eukaryotic cell surface binding; external side of plasma membrane; extracellular matrix; fibrinogen binding; fibrinogen complex; fibroblast growth factor 2 binding; fibronectin binding; heparin binding; identical protein binding; immune response; integrin binding; laminin binding; low-density lipoprotein binding; negative regulation of angiogenesis; negative regulation of antigen processing and presentation of peptide or polysaccharide antigen via MHC class II; negative regulation of blood vessel endothelial cell migration; negative regulation of cGMP-mediated signaling; negative regulation of dendritic cell antigen processing and presentation; negative regulation of endothelial cell proliferation; negative regulation of fibrinolysis; binding | Thrombospondin family                     |
| 241        | TTC7B_HUMAN | TTC7B (TTC7L1)                | Q86TV6        | Tetratricopeptide repeat protein 7B (TPR repeat protein 7B) (Tetratricopeptide repeat protein 7-like-1)                                                           |                                                                                                                                                                                                                                                                                                                                                                                                                                                                                                                                                                                                                                                                                                                                                                                                                                                                                                                                                                                                                  |                                           |
| 242        | TTL12_HUMAN | TTL12 (KIAA0153)              | Q14166        | Tubulin--tyrosine ligase-like protein 12                                                                                                                          | protein modification process; tubulin-tyrosine ligase activity                                                                                                                                                                                                                                                                                                                                                                                                                                                                                                                                                                                                                                                                                                                                                                                                                                                                                                                                                   |                                           |
| 243        | UBE2O_HUMAN | UBE2O (KIAA1734)              | Q9C0C9        | Ubiquitin-conjugating enzyme E2 O (EC 6.3.2.19) (Ubiquitin-protein ligase O) (Ubiquitin carrier protein O) (Ubiquitin-conjugating enzyme E2 of 230 kDa) (E2-230K) | ATP binding; modification-dependent protein catabolic process; post-translational protein modification; regulation of protein metabolic process; ubiquitin-protein ligase activity                                                                                                                                                                                                                                                                                                                                                                                                                                                                                                                                                                                                                                                                                                                                                                                                                               | Ubiquitin-conjugating enzyme family       |
| 244        | UBP24_HUMAN | USP24 (KIAA1057)              | Q9UPU5        | Ubiquitin carboxyl-terminal hydrolase 24 (EC 3.1.2.15) (Ubiquitin thioesterase 24) (Ubiquitin-specific-processing protease 24) (Deubiquitinating enzyme 24)       | cysteine-type peptidase activity; ubiquitin thioesterase activity; ubiquitin-dependent protein catabolic process                                                                                                                                                                                                                                                                                                                                                                                                                                                                                                                                                                                                                                                                                                                                                                                                                                                                                                 | Peptidase C19 family                      |
| 245        | UN13D_HUMAN | UNC13D                        | Q70J99        | Protein unc-13 homolog D (Munc13-4)                                                                                                                               | cytoplasm; membrane                                                                                                                                                                                                                                                                                                                                                                                                                                                                                                                                                                                                                                                                                                                                                                                                                                                                                                                                                                                              | Unc-13 family                             |
| 246        | URP2_HUMAN  | FERMT3 (KIND3) (MIG2B) (URP2) | Q86UX7        | Fermitin family homolog 3 (Unc-112-related protein 2) (Kindlin-3) (MIG2-like protein)                                                                             | cell adhesion; cytoplasm; plasma membrane; protein binding                                                                                                                                                                                                                                                                                                                                                                                                                                                                                                                                                                                                                                                                                                                                                                                                                                                                                                                                                       | Kindlin family                            |
| 247        | VASP_HUMAN  | VASP                          | P50552        | Vasodilator-stimulated phosphoprotein (VASP)                                                                                                                      | SH3 domain binding; actin binding; actin cytoskeleton; cytoplasm; filopodium membrane; focal adhesion; lamellipodium membrane                                                                                                                                                                                                                                                                                                                                                                                                                                                                                                                                                                                                                                                                                                                                                                                                                                                                                    | Ena/VASP family                           |
| 248        | VINC_HUMAN  | VCL                           | P18206        | Vinculin (Metavinculin)                                                                                                                                           | actin binding; actin cytoskeleton; alpha-catenin binding; apical junction assembly; cell adhesion; cell motion; cell-cell junction; costamere; focal adhesion; lamellipodium assembly; negative regulation of cell migration; oxidoreductase activity; protein complex; structural molecule activity                                                                                                                                                                                                                                                                                                                                                                                                                                                                                                                                                                                                                                                                                                             | Vinculin/alpha-catenin family             |
| 249        | WDR1_HUMAN  | WDR1                          | O75083        | WD repeat-containing protein 1 (Actin-interacting protein 1) (AIP1) (NORI-1)                                                                                      | actin binding; cytoplasm; cytoskeleton; sensory perception of sound                                                                                                                                                                                                                                                                                                                                                                                                                                                                                                                                                                                                                                                                                                                                                                                                                                                                                                                                              | WD repeat AIP1 family                     |
| 250        | WDR44_HUMAN | WDR44                         | Q5JSH3        | WD repeat-containing protein 44 (Rabphilin-11)                                                                                                                    | Golgi apparatus; cytosol; endosome membrane; perinuclear region of cytoplasm                                                                                                                                                                                                                                                                                                                                                                                                                                                                                                                                                                                                                                                                                                                                                                                                                                                                                                                                     |                                           |
| 251        | XRN1_HUMAN  | XRN1 (SEP1)                   | Q8IZH2        | 5'-3' exoribonuclease 1 (EC 3.1.11.-) (Strand-exchange protein 1 homolog)                                                                                         | 5'-3' exonuclease activity; DNA binding; RNA binding; cell cycle; cytoplasm; negative regulation of cell cycle; nucleobase, nucleoside, nucleotide and nucleic acid metabolic process; protein binding                                                                                                                                                                                                                                                                                                                                                                                                                                                                                                                                                                                                                                                                                                                                                                                                           | 5'-3' exonuclease family                  |
| 252        | ZCCHL_HUMAN | ZC3HAV1L (C7orf39)            | Q96H79        | Zinc finger CCCH-type antiviral protein 1-like                                                                                                                    | cytoplasm; nucleus; plasma membrane; zinc ion binding                                                                                                                                                                                                                                                                                                                                                                                                                                                                                                                                                                                                                                                                                                                                                                                                                                                                                                                                                            |                                           |
| 253        | ZN185_HUMAN | ZNF185                        | O15231        | Zinc finger protein 185 (LIM domain protein ZNF185) (P1-A)                                                                                                        | adherens junction; cytoplasm; guanylate kinase activity; nucleus; protein binding; tight junction                                                                                                                                                                                                                                                                                                                                                                                                                                                                                                                                                                                                                                                                                                                                                                                                                                                                                                                |                                           |
| 254        | ZO2_HUMAN   | TJP2 (X104) (ZO2)             | Q9UDY2        | Tight junction protein ZO-2 (Zonula occludens protein 2) (Zona occludens protein 2) (Tight junction protein 2)                                                    |                                                                                                                                                                                                                                                                                                                                                                                                                                                                                                                                                                                                                                                                                                                                                                                                                                                                                                                                                                                                                  | MAGUK family                              |

| Entry name       | Gene names         | Uniprot Accession | Protein names                                                                                                                                                                                                                             | Gene Ontology                                                                                                                                                                                                                                      | Protein family                |
|------------------|--------------------|-------------------|-------------------------------------------------------------------------------------------------------------------------------------------------------------------------------------------------------------------------------------------|----------------------------------------------------------------------------------------------------------------------------------------------------------------------------------------------------------------------------------------------------|-------------------------------|
| 255 ZYX_HUMAN    | ZYX                | Q15942            | Zyxin (Zyxin-2)                                                                                                                                                                                                                           | cell adhesion; cell-cell adherens junction; cell-cell signaling; cytoplasm; focal adhesion; integral to plasma membrane; interspecies interaction between organisms; nucleus; protein binding; signal transduction; stress fiber; zinc ion binding | Zyxin/ajuba family            |
| 256 Q2NKW9_HUMAN | EIF4G2             | Q2NKW9            | Eukaryotic translation initiation factor 4 gamma, 2                                                                                                                                                                                       | RNA metabolic process; protein binding; translation initiation factor activity                                                                                                                                                                     |                               |
| 257 Q5JV32_HUMAN |                    | Q5JV32            | Deleted.                                                                                                                                                                                                                                  |                                                                                                                                                                                                                                                    |                               |
| 258 Q6NXR8_HUMAN | RPS3A              | Q6NXR8            | Ribosomal protein S3A                                                                                                                                                                                                                     | ribosome; structural constituent of ribosome; translation                                                                                                                                                                                          | Ribosomal protein S3Ae family |
| 259 Q8N1V6_HUMAN | hCG_2032358        | Q8N1V6            | cDNA FLJ37514 fis, clone BRCAN2000639 (HCG2032358)                                                                                                                                                                                        |                                                                                                                                                                                                                                                    |                               |
| 260 Q96H99_HUMAN | CTTN (hCG_23463)   | Q96H99            | Cortactin (cDNA FLJ77423, highly similar to Homo sapiens cortactin (CTTN), transcript variant 2, mRNA) (Cortactin, isoform CRA_c)                                                                                                         |                                                                                                                                                                                                                                                    |                               |
| 261 Q9NWX2_HUMAN |                    | Q9NWX2            | cDNA FLJ10044 fis, clone HEMBA1001088, moderately similar to PINCH PROTEIN                                                                                                                                                                | zinc ion binding                                                                                                                                                                                                                                   |                               |
| 262 Q9UBY6_HUMAN | MYLK (hCG_2022707) | Q9UBY6            | Kinase-related protein (Kinase-related protein isoform 2) (Myosin light chain kinase) (Myosin, light polypeptide kinase, isoform CRA_e) (cDNA, FLJ95241, Homo sapiens myosin, light polypeptide kinase (MYLK), transcriptvariant 8, mRNA) | kinase activity                                                                                                                                                                                                                                    |                               |
