# Supplementary material for: Proteomic and Phospho-Proteomic Profile of Human Platelets in Basal, Resting State: Insights into Integrin Signaling
Source: PubMed Central journal article supplement (PMC2762604; doi:10.1371/journal.pone.0007627), 2009-10-27
Supplement: pone.0007627.s011.pdf [file pone.0007627.s011.pdf]

| Entry name     | Gene names                                                                             | Uniprot Accession | Protein names                                                                                                                     | Gene Ontology                                                                                                                                                                                                                                                                                                                                                                                                    | Subcellular Localization                       | Protein family                                |
|----------------|----------------------------------------------------------------------------------------|-------------------|-----------------------------------------------------------------------------------------------------------------------------------|------------------------------------------------------------------------------------------------------------------------------------------------------------------------------------------------------------------------------------------------------------------------------------------------------------------------------------------------------------------------------------------------------------------|------------------------------------------------|-----------------------------------------------|
| 1 1433E_HUMAN  | YWHAE                                                                                  | P62258            | 14-3-3 protein epsilon (14-3-3E)                                                                                                  | enzyme binding; interspecies interaction between organisms; intracellular signaling cascade; melanosome                                                                                                                                                                                                                                                                                                          | Cytoplasm. Melanosome.                         | 14-3-3 family                                 |
| 2 1433F_HUMAN  | YWHAH (YWHA1)                                                                          | Q04917            | 14-3-3 protein eta (Protein AS1)                                                                                                  | cytoplasm; enzyme binding; glucocorticoid catabolic process; glucocorticoid receptor binding; glucocorticoid receptor signaling pathway; insulin-like growth factor receptor binding; intracellular protein transport; negative regulation of dendrite morphogenesis; positive regulation of transcription; protein domain specific binding; regulation of synaptic plasticity; transcription activator activity |                                                | 14-3-3 family                                 |
| 3 1433G_HUMAN  | YWHAG                                                                                  | P61981            | 14-3-3 protein gamma (Protein kinase C inhibitor protein 1) (KCIP-1) [Cleaved into: 14-3-3 protein gamma, N-terminally processed] | cytoplasm; insulin-like growth factor receptor binding; negative regulation of protein kinase activity; protein kinase C binding; protein kinase C inhibitor activity; regulation of neuron differentiation; regulation of signal transduction; regulation of synaptic plasticity                                                                                                                                | Cytoplasm.                                     | 14-3-3 family                                 |
| 4 1433T_HUMAN  | YWHAQ                                                                                  | P27348            | 14-3-3 protein theta (14-3-3 protein tau) (14-3-3 protein T-cell) (Protein HS1)                                                   | centrosome; negative regulation of transcription, DNA-dependent; nucleus; protein N-terminus binding; protein domain specific binding                                                                                                                                                                                                                                                                            | Cytoplasm.                                     | 14-3-3 family                                 |
| 5 1433Z_HUMAN  | YWHAZ                                                                                  | P63104            | 14-3-3 protein zeta/delta (Protein kinase C inhibitor protein 1) (KCIP-1)                                                         | anti-apoptosis; melanosome; signal transduction; transcription factor binding                                                                                                                                                                                                                                                                                                                                    | Cytoplasm. Melanosome.                         | 14-3-3 family                                 |
| 6 1A03_HUMAN   | HLA-A (HLAA)                                                                           | P04439            | HLA class I histocompatibility antigen, A-3 alpha chain (MHC class I antigen A*3)                                                 | MHC class I protein complex; MHC class I receptor activity; antigen processing and presentation of peptide antigen via MHC class I; immune response; integral to plasma membrane; interspecies interaction between organisms; protein binding                                                                                                                                                                    | Membrane; Single-pass type I membrane protein. | MHC class I family                            |
| 7 1B07_HUMAN   | HLA-B (HLAB)                                                                           | P01889            | HLA class I histocompatibility antigen, B-7 alpha chain (MHC class I antigen B*7)                                                 | MHC class I protein complex; MHC class I receptor activity; antigen processing and presentation of peptide antigen via MHC class I; immune response; integral to plasma membrane; interspecies interaction between organisms                                                                                                                                                                                     | Membrane; Single-pass type I membrane protein. | MHC class I family                            |
| 8 ACTB_HUMAN   | ACTB                                                                                   | P60709            | Actin, cytoplasmic 1 (Beta-actin) [Cleaved into: Actin, cytoplasmic 1, N-terminally processed]                                    | ATP binding; NuA4 histone acetyltransferase complex; cell motion; histone methyltransferase complex; nitric-oxide synthase binding; sensory perception of sound; structural constituent of cytoskeleton                                                                                                                                                                                                          | Cytoplasm ,cytoskeleton.                       | Actin family                                  |
| 9 ACTBM_HUMAN  | ACTBL3 (FKSG30)                                                                        | Q9BYX7            | Beta-actin-like protein 3 (Kappa-actin)                                                                                           | ATP binding; cytoplasm; cytoskeleton; protein binding                                                                                                                                                                                                                                                                                                                                                            | Cytoplasm ,cytoskeleton.                       | Actin family                                  |
| 10 ACTN4_HUMAN | ACTN4                                                                                  | O43707            | Alpha-actinin-4 (Non-muscle alpha-actinin 4) (F-actin cross-linking protein)                                                      | actin filament binding; calcium ion binding; integrin binding; nucleolus; nucleoside binding; perinuclear region of cytoplasm; positive regulation of cell motion; positive regulation of sodium:hydrogen antiporter activity; protein complex; protein homodimerization activity; pseudopodium; regulation of apoptosis                                                                                         | Nucleus. Cytoplasm.                            | Alpha-actinin family                          |
| 11 ALBU_HUMAN  | ALB (GIG20) (GIG42) (PRO0903) (PRO1708) (PRO2044) (PRO2619) (PRO2675) (UNQ696/PRO1341) | P02768            | Serum albumin                                                                                                                     | DNA binding; antioxidant activity; cellular response to starvation; copper ion binding; drug binding; extracellular space; fatty acid binding; hemolysis by symbiont of host erythrocytes; maintenance of mitochondrion location; negative regulation of apoptosis; platelet alpha granule lumen; protein binding; protein complex; pyridoxal phosphate binding; toxin binding; transport                        | Secreted.                                      | ALB/AFP/VDB family                            |
| 12 ALDOC_HUMAN | ALDOC (ALDC)                                                                           | P09972            | Fructose-bisphosphate aldolase C (EC 4.1.2.13) (Brain-type aldolase)                                                              | cytoskeletal protein binding; cytoskeleton; fructose 1,6-bisphosphate metabolic process; fructose-bisphosphate aldolase activity; glycolysis                                                                                                                                                                                                                                                                     |                                                | Class I fructose-bisphosphate aldolase family |

| Entry name     | Gene names     | Uniprot Accession | Protein names                                                                                                                                                                                     | Gene Ontology                                                                                                                                                                                                                                                                                                                                                                                                                                                                                                                                                                                                                                                                                                                                                                                                                                                                                                                                                                                                          | Subcellular Localization | Protein family                |
|----------------|----------------|-------------------|---------------------------------------------------------------------------------------------------------------------------------------------------------------------------------------------------|------------------------------------------------------------------------------------------------------------------------------------------------------------------------------------------------------------------------------------------------------------------------------------------------------------------------------------------------------------------------------------------------------------------------------------------------------------------------------------------------------------------------------------------------------------------------------------------------------------------------------------------------------------------------------------------------------------------------------------------------------------------------------------------------------------------------------------------------------------------------------------------------------------------------------------------------------------------------------------------------------------------------|--------------------------|-------------------------------|
| 13 ANGT_HUMAN  | AGT (SERPINA8) | P01019            | Angiotensinogen (Serpin A8) [Cleaved into: Angiotensin-1 (Angiotensin I) (Ang I); Angiotensin-2 (Angiotensin II) (Ang II); Angiotensin-3 (Angiotensin III) (Ang III) (Des-Asp[1]-angiotensin II)] | G-protein signaling, coupled to cGMP nucleotide second messenger; acetyltransferase activator activity; activation of phospholipase C activity by G-protein coupled receptor protein signaling pathway coupled to IP3 second messenger; blood vessel remodeling; cell-cell signaling; cytoplasm; extracellular space; growth factor activity; hormone activity; low-density lipoprotein particle remodeling; negative regulation of nerve growth factor receptor signaling pathway; nitric oxide mediated signal transduction; oxygen and reactive oxygen species metabolic process; positive regulation of NAD(P)H oxidase activity; positive regulation of NF-kappaB transcription factor activity; positive regulation of apoptosis; positive regulation of cardiac muscle hypertrophy; positive regulation of cholesterol esterification; positive regulation of cytokine production; positive regulation of endothelial cell migration; positive regulation of epidermal growth factor receptor signaling pathway | Secreted.                | Serpin family                 |
| 14 APOA1_HUMAN | APOA1          | P02647            | Apolipoprotein A-I (Apo-AI) (ApoA-I) [Cleaved into: Apolipoprotein A-I(1-242)]                                                                                                                    | Cdc42 protein signal transduction; G-protein coupled receptor protein signaling pathway; apolipoprotein A-I receptor binding; beta-amyloid binding; cholesterol binding; cholesterol efflux; cholesterol homeostasis; cholesterol import; cholesterol metabolic process; cholesterol transporter activity; endocytic vesicle; endoplasmic reticulum lumen; enzyme binding; high-density lipoprotein particle assembly; high-density lipoprotein particle clearance; identical protein binding; lipoprotein metabolic process; lipoprotein receptor binding; negative regulation of cytokine secretion during immune response; negative regulation of interleukin-1 beta secretion; negative regulation of very-low-density lipoprotein particle remodeling; phosphatidylcholine biosynthetic process; phosphatidylcholine-sterol O-acyltransferase activator activity; phospholipid binding; phospholipid efflux; positive regulation of cholesterol efflux                                                            | Secreted.                | Apolipoprotein A1/A4/E family |
| 15 APOC3_HUMAN | APOC3          | P02656            | Apolipoprotein C-III (Apo-CIII) (ApoC-III)                                                                                                                                                        | Cdc42 protein signal transduction; G-protein coupled receptor protein signaling pathway; cholesterol binding; cholesterol efflux; cholesterol homeostasis; chylomicron; chylomicron remnant clearance; high-density lipoprotein particle clearance; high-density lipoprotein particle remodeling; intermediate-density lipoprotein particle; lipase inhibitor activity; lipoprotein metabolic process; lipoprotein receptor binding; low-density lipoprotein particle clearance; negative regulation of cholesterol transport; negative regulation of fatty acid biosynthetic process; negative regulation of lipoprotein lipase activity; negative regulation of receptor-mediated endocytosis; negative regulation of triglyceride catabolic process; negative regulation of very-low-density lipoprotein particle clearance; negative regulation of very-low-density lipoprotein particle remodeling; phospholipid binding; phospholipid efflux; reverse cholesterol transport; spherical                           | Secreted.                | Apolipoprotein C3 family      |

| Entry name     | Gene names                                                                            | Uniprot Accession | Protein names                                                                          | Gene Ontology                                                                                                                                                                                                                                                                                                                                                                                                                                                                                                                                       | Subcellular Localization                     | Protein family                               |
|----------------|---------------------------------------------------------------------------------------|-------------------|----------------------------------------------------------------------------------------|-----------------------------------------------------------------------------------------------------------------------------------------------------------------------------------------------------------------------------------------------------------------------------------------------------------------------------------------------------------------------------------------------------------------------------------------------------------------------------------------------------------------------------------------------------|----------------------------------------------|----------------------------------------------|
| 16 ARC1B_HUMAN | ARPC1B (ARC41)                                                                        | O15143            | Actin-related protein 2/3 complex subunit 1B (Arp2/3 complex 41 kDa subunit) (p41-ARC) | Arp2/3 protein complex; actin binding; cell motion; cytoplasm; regulation of actin filament polymerization; structural constituent of cytoskeleton                                                                                                                                                                                                                                                                                                                                                                                                  | Cytoplasm ,cytoskeleton.                     | WD repeat ARPC1 family                       |
| 17 ARPC2_HUMAN | ARPC2 (ARC34) (PRO2446)                                                               | O15144            | Actin-related protein 2/3 complex subunit 2 (Arp2/3 complex 34 kDa subunit) (p34-ARC)  | Arp2/3 protein complex; actin binding; cell motion; cell projection; cytoplasm; structural constituent of cytoskeleton                                                                                                                                                                                                                                                                                                                                                                                                                              | Cytoplasm ,cytoskeleton. Cell projection.    | ARPC2 family                                 |
| 18 ATPB_HUMAN  | ATP5B (ATPMB) (ATPSB)                                                                 | P06576            | ATP synthase subunit beta, mitochondrial (EC 3.6.3.14)                                 | ATP binding; ATP synthesis coupled proton transport; MHC class I protein binding; angiogenesis; cell surface; eukaryotic cell surface binding; hydrogen ion transporting ATP synthase activity, rotational mechanism; hydrogen-exporting ATPase activity, phosphorylative mechanism; mitochondrial nucleoid; mitochondrial proton-transporting ATP synthase, catalytic core; plasma membrane; proton-transporting ATPase activity, rotational mechanism; regulation of intracellular pH                                                             | Mitochondrion. Mitochondrion inner membrane. | ATPase alpha/beta chains family              |
| 19 CALM_HUMAN  | CALM1 (CALM) (CAM) (CAM1); CALM2 (CAM2) (CAMB); CALM3 (CALML2) (CAM3) (CAMC) (CAMIII) | P62158            | Calmodulin (CaM)                                                                       | G-protein coupled receptor protein signaling pathway; N-terminal myristoylation domain binding; calcium ion binding; centrosome; cytosol; negative regulation of ryanodine-sensitive calcium-release channel activity; plasma membrane; positive regulation of ryanodine-sensitive calcium-release channel activity; protein domain specific binding; regulation of cytokinesis; regulation of release of sequestered calcium ion into cytosol by sarcoplasmic reticulum; response to calcium ion; spindle microtubule; spindle pole; titin binding | Spindle.                                     | Calmodulin family                            |
| 20 CAPZB_HUMAN | CAPZB                                                                                 | P47756            | F-actin-capping protein subunit beta (CapZ beta)                                       | F-actin capping protein complex; actin binding; actin cytoskeleton organization; barbed-end actin filament capping; cell motion; cytoplasm                                                                                                                                                                                                                                                                                                                                                                                                          | Cytoplasm ,cytoskeleton.                     | F-actin-capping protein beta subunit family  |
| 21 CAZA1_HUMAN | CAPZA1                                                                                | P52907            | F-actin-capping protein subunit alpha-1 (CapZ alpha-1)                                 | F-actin capping protein complex; actin binding; actin cytoskeleton organization; barbed-end actin filament capping; cell motion; protein complex assembly                                                                                                                                                                                                                                                                                                                                                                                           |                                              | F-actin-capping protein alpha subunit family |
| 22 CDN1B_HUMAN | CDKN1B (KIP1)                                                                         | P46527            | Cyclin-dependent kinase inhibitor 1B (Cyclin-dependent kinase inhibitor p27) (p27Kip1) | G1/S transition of mitotic cell cycle; autophagic cell death; cell cycle arrest; cyclin-dependent protein kinase inhibitor activity; cytosol; induction of apoptosis; negative regulation of cell growth; negative regulation of cell proliferation; negative regulation of phosphorylation; nucleus; protein binding; regulation of cyclin-dependent protein kinase activity; transforming growth factor beta receptor, cytoplasmic mediator activity                                                                                              | Nucleus. Cytoplasm.                          | CDI family                                   |

| Entry name     | Gene names                       | Uniprot Accession | Protein names                                                                                                                                                                                                                                                                                                                                                                                                       | Gene Ontology                                                                                                                                                                                                                                                                                                                                                                                                                                                                                                                                                                                                                                                                                                                                                                                                                                                                                                                                                                                    | Subcellular Localization                                                                                                                                      | Protein family                                         |
|----------------|----------------------------------|-------------------|---------------------------------------------------------------------------------------------------------------------------------------------------------------------------------------------------------------------------------------------------------------------------------------------------------------------------------------------------------------------------------------------------------------------|--------------------------------------------------------------------------------------------------------------------------------------------------------------------------------------------------------------------------------------------------------------------------------------------------------------------------------------------------------------------------------------------------------------------------------------------------------------------------------------------------------------------------------------------------------------------------------------------------------------------------------------------------------------------------------------------------------------------------------------------------------------------------------------------------------------------------------------------------------------------------------------------------------------------------------------------------------------------------------------------------|---------------------------------------------------------------------------------------------------------------------------------------------------------------|--------------------------------------------------------|
| 23 CH60_HUMAN  | HSPD1 (HSP60)                    | P10809            | 60 kDa heat shock protein, mitochondrial (Heat shock protein 60) (HSP-60) (Hsp60) (60 kDa chaperonin) (Chaperonin 60) (CPN60) (Mitochondrial matrix protein P1) (P60 lymphocyte protein) (HuCHA60)                                                                                                                                                                                                                  | 'de novo' protein folding; ATP binding; ATPase activity; B cell cytokine production; B cell proliferation; DNA replication origin binding; MyD88-dependent toll-like receptor signaling pathway; T cell activation; activation of caspase activity; cell surface; cell surface binding; chaperone binding; chaperone-mediated protein complex assembly; coated pit; coated vesicle; cytosol; early endosome; extracellular space; interspecies interaction between organisms; isotype switching to IgG isotypes; lipopolysaccharide binding; lipopolysaccharide receptor complex; mitochondrial inner membrane; mitochondrial matrix; negative regulation of apoptosis; p53 binding; positive regulation of T cell activation; positive regulation of T cell mediated immune response to tumor cell; positive regulation of apoptosis; positive regulation of interferon-alpha production; positive regulation of interferon-gamma production; positive regulation of interleukin-10 production; | Mitochondrion matrix.                                                                                                                                         | Chaperonin (HSP60) family                              |
| 24 CLH1_HUMAN  | CLTC (CLH17) (CLTCL2) (KIAA0034) | Q00610            | Clathrin heavy chain 1 (CLH-17)                                                                                                                                                                                                                                                                                                                                                                                     | clathrin coat of coated pit; clathrin coat of trans-Golgi network vesicle; intracellular protein transport; melanosome; protein binding; structural molecule activity; vesicle-mediated transport                                                                                                                                                                                                                                                                                                                                                                                                                                                                                                                                                                                                                                                                                                                                                                                                | Cytoplasmic vesicle membrane; Peripheral membrane protein; Cytoplasmic side. Membrane ,coated pit; Peripheral membrane protein; Cytoplasmic side. Melanosome. | Clathrin heavy chain family                            |
| 25 CLIC1_HUMAN | CLIC1 (NCC27)                    | O00299            | Chloride intracellular channel protein 1 (Nuclear chloride ion channel 27) (NCC27) (Chloride channel ABP) (Regulatory nuclear chloride ion channel protein) (hRNCC)                                                                                                                                                                                                                                                 | brush border; chloride ion binding; chloride transport; integral to membrane; membrane fraction; nuclear membrane; plasma membrane; signal transduction; soluble fraction; voltage-gated chloride channel activity                                                                                                                                                                                                                                                                                                                                                                                                                                                                                                                                                                                                                                                                                                                                                                               | Nucleus. Nucleus membrane; Single-pass membrane protein. Cytoplasm. Cell membrane; Single-pass membrane protein.                                              | Chloride channel CLIC family                           |
| 26 CLIC4_HUMAN | CLIC4                            | Q9Y696            | Chloride intracellular channel protein 4 (Intracellular chloride ion channel protein p64H1)                                                                                                                                                                                                                                                                                                                         | actin cytoskeleton; cell differentiation; chloride ion binding; chloride transport; cytoplasmic vesicle membrane; integral to membrane; microvillus; negative regulation of cell migration; nucleus; plasma membrane; protein binding; soluble fraction; voltage-gated chloride channel activity                                                                                                                                                                                                                                                                                                                                                                                                                                                                                                                                                                                                                                                                                                 | Cytoplasm. Cytoplasmic vesicle membrane; Single-pass membrane protein. Nucleus. Cell membrane; Single-pass membrane protein.                                  | Chloride channel CLIC family                           |
| 27 CLUS_HUMAN  | CLU (APOJ) (CLI) (KUB1) (AAG4)   | P10909            | Clusterin (Complement-associated protein SP-40,40) (Complement cytolytic inhibitor) (CLI) (NA1/NA2) (Apolipoprotein J) (Apo-J) (Testosterone-repressed prostate message 2) (TRPM-2) (Ku70-binding protein 1) (Aging-associated gene 4 protein) [Cleaved into: Clusterin beta chain (ApoJalpha) (Complement cytolytic inhibitor a chain); Clusterin alpha chain (ApoJbeta) (Complement cytolytic inhibitor b chain)] | apoptosis; complement activation, classical pathway; innate immune response; lipid metabolic process; protein binding; reverse cholesterol transport; spherical high-density lipoprotein particle                                                                                                                                                                                                                                                                                                                                                                                                                                                                                                                                                                                                                                                                                                                                                                                                | Secreted.                                                                                                                                                     | Clusterin family                                       |
| 28 CO3_HUMAN   | C3 (CPAMD1)                      | P01024            | Complement C3 (C3 and PZP-like alpha-2-macroglobulin domain-containing protein 1) [Cleaved into: Complement C3 beta chain; Complement C3 alpha chain; C3a anaphylatoxin; Complement C3b alpha' chain; Complement C3c alpha' chain fragment 1; Complement C3dg fragment; Complement C3g fragment; Complement C3d fragment; Complement C3f fragment; Complement C3c alpha' chain fragment 2]                          | G-protein coupled receptor protein signaling pathway; complement activation, alternative pathway; complement activation, classical pathway; endopeptidase inhibitor activity; extracellular space; receptor binding                                                                                                                                                                                                                                                                                                                                                                                                                                                                                                                                                                                                                                                                                                                                                                              | Secreted.                                                                                                                                                     |                                                        |
| 29 COF1_HUMAN  | CFL1 (CFL)                       | P23528            | Cofilin-1 (Cofilin, non-muscle isoform) (18 kDa phosphoprotein) (p18)                                                                                                                                                                                                                                                                                                                                               | Rho protein signal transduction; actin binding; anti-apoptosis; nuclear matrix                                                                                                                                                                                                                                                                                                                                                                                                                                                                                                                                                                                                                                                                                                                                                                                                                                                                                                                   | Nucleus matrix. Cytoplasm ,cytoskeleton.                                                                                                                      | Actin-binding proteins ADF family                      |
| 30 COTL1_HUMAN | COTL1 (CLP)                      | Q14019            | Coactosin-like protein                                                                                                                                                                                                                                                                                                                                                                                              | actin binding; cytoplasm; cytoskeleton; enzyme binding                                                                                                                                                                                                                                                                                                                                                                                                                                                                                                                                                                                                                                                                                                                                                                                                                                                                                                                                           | Cytoplasm ,cytoskeleton.                                                                                                                                      | Actin-binding proteins ADF family, Coactosin subfamily |
| 31 CPNS1_HUMAN | CAPNS1 (CAPN4) (CAPNS)           | P04632            | Calpain small subunit 1 (CSS1) (Calcium-dependent protease small subunit 1) (Calcium-dependent protease small subunit) (CDPS) (Calpain regulatory subunit) (Calcium-activated neutral proteinase small subunit) (CANP small subunit)                                                                                                                                                                                | calcium ion binding; calcium-dependent cysteine-type endopeptidase activity; cytoplasm; nucleus; plasma membrane; positive regulation of cell proliferation; protein binding                                                                                                                                                                                                                                                                                                                                                                                                                                                                                                                                                                                                                                                                                                                                                                                                                     | Cytoplasm. Cell membrane.                                                                                                                                     |                                                        |

| Entry name     | Gene names                           | Uniprot Accession | Protein names                                                                                                                                                                                                     | Gene Ontology                                                                                                                                                                                                                                                                                                                                                              | Subcellular Localization                                                                                                                                                | Protein family                                                                     |
|----------------|--------------------------------------|-------------------|-------------------------------------------------------------------------------------------------------------------------------------------------------------------------------------------------------------------|----------------------------------------------------------------------------------------------------------------------------------------------------------------------------------------------------------------------------------------------------------------------------------------------------------------------------------------------------------------------------|-------------------------------------------------------------------------------------------------------------------------------------------------------------------------|------------------------------------------------------------------------------------|
| 32 DUS3_HUMAN  | DUSP3 (VHR)                          | P51452            | Dual specificity protein phosphatase 3 (EC 3.1.3.48) (EC 3.1.3.16) (Dual specificity protein phosphatase VHR)                                                                                                     | nucleoplasm; protein amino acid dephosphorylation; protein tyrosine phosphatase activity                                                                                                                                                                                                                                                                                   |                                                                                                                                                                         | Protein-tyrosine phosphatase family, Non-receptor class dual specificity subfamily |
| 33 EHD3_HUMAN  | EHD3 (EHD2) (PAST3)                  | Q9NZN3            | EH domain-containing protein 3                                                                                                                                                                                    | ATP binding; GTP binding; GTPase activity; calcium ion binding; nucleic acid binding; nucleus; plasma membrane; recycling endosome membrane                                                                                                                                                                                                                                | Cell membrane; Peripheral membrane protein; Cytoplasmic side. Endosome membrane; Peripheral membrane protein. Recycling endosome membrane; Peripheral membrane protein. |                                                                                    |
| 34 EMIL1_HUMAN | EMILIN1 (EMI)                        | Q9Y6C2            | EMILIN-1 (Elastin microfibril interface-located protein 1) (Elastin microfibril interfacier 1)                                                                                                                    | cell adhesion; centrosome; extracellular space; nucleus; proteinaceous extracellular matrix                                                                                                                                                                                                                                                                                | Secreted ,extracellular space ,extracellular matrix.                                                                                                                    |                                                                                    |
| 35 ENDD1_HUMAN | ENDOD1 (KIAA0830)                    | O94919            | Endonuclease domain-containing 1 protein (EC 3.1.30.-)                                                                                                                                                            | endonuclease activity; extracellular region; metal ion binding; nucleic acid binding                                                                                                                                                                                                                                                                                       | Secreted.                                                                                                                                                               | DNA/RNA non-specific endonuclease family                                           |
| 36 ENOA_HUMAN  | ENO1 (ENO1L1) (MBPB1) (MPB1)         | P06733            | Alpha-enolase (EC 4.2.1.11) (2-phospho-D-glycerate hydro-lyase) (Non-neural enolase) (NNE) (Enolase 1) (Phosphopyruvate hydratase) (C-myc promoter-binding protein) (MBP-1) (MPB-1) (Plasminogen-binding protein) | M band; glycolysis; magnesium ion binding; negative regulation of cell growth; negative regulation of transcription from RNA polymerase II promoter; nucleus; phosphopyruvate hydratase activity; phosphopyruvate hydratase complex; plasma membrane; serine-type endopeptidase activity; transcription; transcription corepressor activity; transcription factor activity | Cytoplasm. Cell membrane. Cytoplasm ,myofibril ,sarcomere ,M-band. Nucleus.                                                                                             | Enolase family                                                                     |
| 37 ENPL_HUMAN  | HSP90B1 (TRA1)                       | P14625            | Endoplasmic (Heat shock protein 90 kDa beta member 1) (94 kDa glucose-regulated protein) (GRP94) (gp96 homolog) (Tumor rejection antigen 1)                                                                       | ATP binding; RNA binding; anti-apoptosis; calcium ion binding; cytosol; endoplasmic reticulum lumen; endoplasmic reticulum membrane; low-density lipoprotein receptor binding; melanosome; microsome; perinuclear region of cytoplasm; protein folding; protein transport; response to hypoxia; sequestering of calcium ion; unfolded protein binding; virion binding      | Endoplasmic reticulum lumen. Melanosome.                                                                                                                                | Heat shock protein 90 family                                                       |
| 38 F13A_HUMAN  | F13A1 (F13A)                         | P00488            | Coagulation factor XIII A chain (Coagulation factor XIIIa) (EC 2.3.2.13) (Protein-glutamine gamma-glutamyltransferase A chain) (Transglutaminase A chain)                                                         | acyltransferase activity; blood coagulation; calcium ion binding; cytoplasm; extracellular region; protein-glutamine gamma-glutamyltransferase activity                                                                                                                                                                                                                    | Cytoplasm. Secreted.                                                                                                                                                    | Transglutaminase superfamily, Transglutaminase family                              |
| 39 FIBB_HUMAN  | FGB                                  | P02675            | Fibrinogen beta chain [Cleaved into: Fibrinopeptide B]                                                                                                                                                            | eukaryotic cell surface binding; external side of plasma membrane; fibrinogen complex; nucleus; platelet activation; platelet alpha granule lumen; protein binding, bridging; protein polymerization; receptor binding; response to calcium ion; signal transduction; soluble fraction                                                                                     | Secreted.                                                                                                                                                               |                                                                                    |
| 40 FIBG_HUMAN  | FGG (PRO2061)                        | P02679            | Fibrinogen gamma chain                                                                                                                                                                                            | calcium ion binding; eukaryotic cell surface binding; external side of plasma membrane; fibrinogen complex; platelet activation; platelet alpha granule lumen; protein binding, bridging; protein polymerization; receptor binding; response to calcium ion; signal transduction                                                                                           | Secreted.                                                                                                                                                               |                                                                                    |
| 41 GANAB_HUMAN | GANAB (G2AN) (KIAA0088)              | Q14697            | Neutral alpha-glucosidase AB (EC 3.2.1.84) (Glucosidase II subunit alpha) (Alpha-glucosidase 2)                                                                                                                   | Golgi apparatus; carbohydrate metabolic process; endoplasmic reticulum; glucan 1,3-alpha-glucosidase activity; melanosome; protein binding                                                                                                                                                                                                                                 | Endoplasmic reticulum. Golgi apparatus. Melanosome.                                                                                                                     | Glycosyl hydrolase 31 family                                                       |
| 42 GBB1_HUMAN  | GNB1                                 | P62873            | Guanine nucleotide-binding protein G(I)/G(S)/G(T) subunit beta-1 (Transducin beta chain 1)                                                                                                                        | GTPase activity; Ras protein signal transduction; hormone-mediated signaling; muscarinic acetylcholine receptor signaling pathway; signal transducer activity                                                                                                                                                                                                              |                                                                                                                                                                         | WD repeat G protein beta family                                                    |
| 43 GDIA_HUMAN  | GDI1 (GDIL) (OPHN2) (RABGDIA) (XAP4) | P31150            | Rab GDP dissociation inhibitor alpha (Rab GDI alpha) (Guanosine diphosphate dissociation inhibitor 1) (GDI-1) (Oligophrenin-2) (Protein XAP-4)                                                                    | GTPase activator activity; Rab GDP-dissociation inhibitor activity; cytoplasm; protein binding; protein transport; regulation of GTPase activity                                                                                                                                                                                                                           | Cytoplasm.                                                                                                                                                              | Rab GDI family                                                                     |

| Entry name     | Gene names                       | Uniprot Accession | Protein names                                                                                                                                                                                                             | Gene Ontology                                                                                                                                                                                                                                                                                                                                                                                       | Subcellular Localization                                                                                                                                                                                                                  | Protein family                                        |
|----------------|----------------------------------|-------------------|---------------------------------------------------------------------------------------------------------------------------------------------------------------------------------------------------------------------------|-----------------------------------------------------------------------------------------------------------------------------------------------------------------------------------------------------------------------------------------------------------------------------------------------------------------------------------------------------------------------------------------------------|-------------------------------------------------------------------------------------------------------------------------------------------------------------------------------------------------------------------------------------------|-------------------------------------------------------|
| 44 GDIR2_HUMAN | ARHGDI2 (GDIA2) (GDI4) (RAP1GN1) | P52566            | Rho GDP-dissociation inhibitor 2 (Rho GDI 2) (Rho-GDI beta) (Ly-GDI)                                                                                                                                                      | GTPase activator activity; Rho GDP-dissociation inhibitor activity; Rho protein signal transduction; actin cytoskeleton organization; cell motion; cytoplasmic membrane-bounded vesicle; cytoskeleton; immune response; multicellular organismal development; negative regulation of cell adhesion                                                                                                  | Cytoplasm.                                                                                                                                                                                                                                | Rho GDI family                                        |
| 45 GELS_HUMAN  | GSN                              | P06396            | Gelsolin (Actin-depolymerizing factor) (ADF) (Brevin) (AGEL)                                                                                                                                                              | actin binding; actin cytoskeleton; actin filament polymerization; actin filament severing; barbed-end actin filament capping; calcium ion binding; cytosol; extracellular region                                                                                                                                                                                                                    | Cytoplasm ,cytoskeleton. Secreted.                                                                                                                                                                                                        | Villin/gelsolin family                                |
| 46 GMPR1_HUMAN | GMPR (GMPR1)                     | P36959            | GMP reductase 1 (EC 1.7.1.7) (Guanosine 5'-monophosphate oxidoreductase 1) (Guanosine monophosphate reductase 1)                                                                                                          | GMP reductase activity; nucleotide metabolic process; oxidation reduction; potassium ion binding; response to cold                                                                                                                                                                                                                                                                                  |                                                                                                                                                                                                                                           | IMPDH/GMPR family                                     |
| 47 GPSM1_HUMAN | GPSM1 (AGS3)                     | Q86YR5            | G-protein-signaling modulator 1 (Activator of G-protein signaling 3)                                                                                                                                                      | GTPase activator activity; Golgi membrane; binding; cell differentiation; cytosol; endoplasmic reticulum membrane; nervous system development; plasma membrane; signal transduction                                                                                                                                                                                                                 | Cytoplasm ,cytosol. Endoplasmic reticulum membrane; Peripheral membrane protein; Cytoplasmic side. Golgi apparatus membrane; Peripheral membrane protein; Cytoplasmic side. Cell membrane; Peripheral membrane protein; Cytoplasmic side. | GPSM family                                           |
| 48 GRP78_HUMAN | HSPA5 (GRP78)                    | P11021            | 78 kDa glucose-regulated protein (GRP 78) (Heat shock 70 kDa protein 5) (Immunoglobulin heavy chain-binding protein) (BiP) (Endoplasmic reticulum lumenal Ca(2+)-binding protein grp78)                                   | ATP binding; ER-Golgi intermediate compartment; anti-apoptosis; calcium ion binding; caspase inhibitor activity; cell surface; cellular response to glucose starvation; endoplasmic reticulum lumen; integral to endoplasmic reticulum membrane; melanosome; negative regulation of caspase activity; nucleus; perinuclear region of cytoplasm; protein binding, bridging; unfolded protein binding | Endoplasmic reticulum lumen. Melanosome.                                                                                                                                                                                                  | Heat shock protein 70 family                          |
| 49 GSTP1_HUMAN | GSTP1 (FAEES3) (GST3)            | P09211            | Glutathione S-transferase P (EC 2.5.1.18) (GST class-pi) (GSTP1-1)                                                                                                                                                        | anti-apoptosis; central nervous system development; cytoplasm; glutathione transferase activity; metabolic process; protein binding                                                                                                                                                                                                                                                                 |                                                                                                                                                                                                                                           | GST superfamily, Pi family                            |
| 50 HCDH_HUMAN  | HADH (HAD) (HADHSC) (SCHAD)      | Q16836            | Hydroxyacyl-coenzyme A dehydrogenase, mitochondrial (HCDH) (EC 1.1.1.35) (Short chain 3-hydroxyacyl-CoA dehydrogenase) (Medium and short chain L-3-hydroxyacyl-coenzyme A dehydrogenase)                                  | 3-hydroxyacyl-CoA dehydrogenase activity; coenzyme binding; fatty acid metabolic process; mitochondrial matrix; oxidation reduction                                                                                                                                                                                                                                                                 | Mitochondrion matrix.                                                                                                                                                                                                                     | 3-hydroxyacyl-CoA dehydrogenase family                |
| 51 HPT_HUMAN   | HP                               | P00738            | Haptoglobin [Cleaved into: Haptoglobin alpha chain; Haptoglobin beta chain]                                                                                                                                               | cellular iron ion homeostasis; defense response; extracellular region; hemoglobin binding; proteolysis; serine-type endopeptidase activity                                                                                                                                                                                                                                                          | Secreted.                                                                                                                                                                                                                                 | Peptidase S1 family                                   |
| 52 HSP76_HUMAN | HSPA6 (HSP70B')                  | P17066            | Heat shock 70 kDa protein 6 (Heat shock 70 kDa protein B')                                                                                                                                                                | ATP binding; response to unfolded protein                                                                                                                                                                                                                                                                                                                                                           |                                                                                                                                                                                                                                           | Heat shock protein 70 family                          |
| 53 HSP7C_HUMAN | HSPA8 (HSC70) (HSP73) (HSPA10)   | P11142            | Heat shock cognate 71 kDa protein (Heat shock 70 kDa protein 8)                                                                                                                                                           | ATP binding; ATPase activity, coupled; cell surface; melanosome; protein binding; protein folding; response to unfolded protein                                                                                                                                                                                                                                                                     | Cytoplasm. Melanosome.                                                                                                                                                                                                                    | Heat shock protein 70 family                          |
| 54 IDHP_HUMAN  | IDH2                             | P48735            | Isocitrate dehydrogenase [NADP], mitochondrial (IDH) (EC 1.1.1.42) (Oxalosuccinate decarboxylase) (NADP(+)-specific ICDH) (IDP) (ICD-M)                                                                                   | NAD or NADH binding; glyoxylate cycle; isocitrate dehydrogenase (NADP+) activity; isocitrate metabolic process; magnesium ion binding; manganese ion binding; mitochondrion; oxidation reduction; tricarboxylic acid cycle                                                                                                                                                                          | Mitochondrion.                                                                                                                                                                                                                            | Isocitrate and isopropylmalate dehydrogenase s family |
| 55 ITA2B_HUMAN | ITGA2B (GP2B) (ITGAB)            | P08514            | Integrin alpha-IIb (Platelet membrane glycoprotein IIb) (GPaIIb) (GPIIb) (CD antigen CD41) [Cleaved into: Integrin alpha-IIb heavy chain; Integrin alpha-IIb light chain, form 1; Integrin alpha-IIb light chain, form 2] | calcium ion binding; cell adhesion; identical protein binding; integrin complex; integrin-mediated signaling pathway; platelet alpha granule membrane; receptor activity                                                                                                                                                                                                                            | Membrane; Single-pass type I membrane protein.                                                                                                                                                                                            | Integrin alpha chain family                           |
| 56 ITA6_HUMAN  | ITGA6                            | P23229            | Integrin alpha-6 (VLA-6) (CD49 antigen-like family member F) (CD antigen CD49f) [Cleaved into: Integrin alpha-6 heavy chain; Integrin alpha-6 light chain]                                                                | calcium ion binding; cell adhesion; cell-substrate junction assembly; integrin complex; integrin-mediated signaling pathway; protein binding; receptor activity                                                                                                                                                                                                                                     | Membrane; Single-pass type I membrane protein.                                                                                                                                                                                            | Integrin alpha chain family                           |

| Entry name     | Gene names                           | Uniprot Accession | Protein names                                                                                                                                                                                                                    | Gene Ontology                                                                                                                                                                                                                                                                                                                                                                                                                                                | Subcellular Localization                                                                     | Protein family                                    |
|----------------|--------------------------------------|-------------------|----------------------------------------------------------------------------------------------------------------------------------------------------------------------------------------------------------------------------------|--------------------------------------------------------------------------------------------------------------------------------------------------------------------------------------------------------------------------------------------------------------------------------------------------------------------------------------------------------------------------------------------------------------------------------------------------------------|----------------------------------------------------------------------------------------------|---------------------------------------------------|
| 57 ITB1_HUMAN  | ITGB1 (FNRR) (MDF2) (MSK12)          | P05556            | Integrin beta-1 (Fibronectin receptor subunit beta) (Integrin VLA-4 subunit beta) (CD antigen CD29)                                                                                                                              | B cell differentiation; cell surface; cell-cell adhesion mediated by integrin; cell-matrix adhesion; cellular defense response; homophilic cell adhesion; identical protein binding; integrin complex; integrin-mediated signaling pathway; interspecies interaction between organisms; leukocyte adhesion; melanosome; neuromuscular junction; protein heterodimerization activity; receptor activity; ruffle; sarcolemma                                   | Cell membrane; Single-pass type I membrane protein. Melanosome.                              | Integrin beta chain family                        |
| 58 K1C9_HUMAN  | KRT9                                 | P35527            | Keratin, type I cytoskeletal 9 (Cytokeratin-9) (CK-9) (Keratin-9) (K9)                                                                                                                                                           | cytoplasm; intermediate filament; intermediate filament organization; protein binding; skin development; structural constituent of cytoskeleton                                                                                                                                                                                                                                                                                                              |                                                                                              | Intermediate filament family                      |
| 59 K6PP_HUMAN  | PFKP (PFKF)                          | Q01813            | 6-phosphofructokinase type C (EC 2.7.1.11) (Phosphofructokinase 1) (Phosphohexokinase) (Phosphofructo-1-kinase isozyme C) (PFK-C) (6-phosphofructokinase, platelet type)                                                         | 6-phosphofructokinase activity; 6-phosphofructokinase complex; ATP binding; glycolysis; magnesium ion binding; protein binding                                                                                                                                                                                                                                                                                                                               |                                                                                              | Phosphofructokinase family, Two domains subfamily |
| 60 LIMS1_HUMAN | LIMS1 (PINCH) (PINCH1)               | P48059            | LIM and senescent cell antigen-like-containing domain protein 1 (Particularly interesting new Cys-His protein 1) (PINCH-1) (Renal carcinoma antigen NY-REN-48)                                                                   | cell aging; focal adhesion; protein binding; zinc ion binding                                                                                                                                                                                                                                                                                                                                                                                                | Cell junction ,focal adhesion. Cell membrane; Peripheral membrane protein; Cytoplasmic side. |                                                   |
| 61 LTBP1_HUMAN | LTBP1                                | Q14766            | Latent-transforming growth factor beta-binding protein 1 (LTBP-1) (Transforming growth factor beta-1-binding protein 1) (TGF-beta1-BP-1)                                                                                         | calcium ion binding; cytoplasm; growth factor binding; nucleus; proteinaceous extracellular matrix; transforming growth factor beta receptor activity                                                                                                                                                                                                                                                                                                        | Membrane; Single-pass type I membrane protein.                                               | LTBP family                                       |
| 62 LYAM3_HUMAN | SELP (GMRP) (GRMP)                   | P16109            | P-selectin (Granule membrane protein 140) (GMP-140) (PADGEM) (Leukocyte-endothelial cell adhesion molecule 3) (LECAM3) (CD62 antigen-like family member P) (CD antigen CD62P)                                                    | defense response to Gram-negative bacterium; external side of plasma membrane; extracellular space; fucose binding; glycosphingolipid binding; heparin binding; integral to plasma membrane; leukocyte adhesion; lipopolysaccharide binding; membrane fraction; oligosaccharide binding; platelet alpha granule membrane; positive regulation of platelet activation; protein binding; response to lipopolysaccharide; sialic acid binding; soluble fraction |                                                                                              | Selectin/LECAM family                             |
| 63 MARE1_HUMAN | MAPRE1                               | Q15691            | Microtubule-associated protein RP/EB family member 1 (APC-binding protein EB1) (End-binding protein 1) (EB1)                                                                                                                     | cell division; cell proliferation; cortical microtubule cytoskeleton; microtubule plus-end binding; mitosis; negative regulation of microtubule polymerization; protein C-terminus binding                                                                                                                                                                                                                                                                   | Cytoplasm.                                                                                   | MAPRE family                                      |
| 64 MARE2_HUMAN | MAPRE2 (RP1)                         | Q15555            | Microtubule-associated protein RP/EB family member 2 (APC-binding protein EB2) (End-binding protein 2) (EB2)                                                                                                                     | cell division; cell proliferation; cytoplasm; microtubule; microtubule binding; mitosis; signal transduction                                                                                                                                                                                                                                                                                                                                                 | Cytoplasm.                                                                                   | MAPRE family                                      |
| 65 MLH1_HUMAN  | MLH1 (COCA2)                         | P40692            | DNA mismatch repair protein Mlh1 (MutL protein homolog 1)                                                                                                                                                                        | ATP binding; cell cycle; mismatch repair; mismatched DNA binding; negative regulation of cell cycle; nucleus; protein binding                                                                                                                                                                                                                                                                                                                                | Nucleus.                                                                                     | DNA mismatch repair mutL/hexB family              |
| 66 MMRN1_HUMAN | MMRN1 (ECM) (EMILIN4) (GPIA*) (MMRN) | Q13201            | Multimerin-1 (Endothelial cell multimerin) (EMILIN-4) (Elastin microfibril interface located protein 4) (Elastin microfibril interfacar 4) [Cleaved into: Platelet glycoprotein Ia*; 155 kDa platelet multimerin (p-155) (p155)] | blood coagulation; cell adhesion; extracellular region; platelet alpha granule lumen                                                                                                                                                                                                                                                                                                                                                                         | Secreted.                                                                                    |                                                   |
| 67 MPPH1_HUMAN | MPPH1 (KRMP1)                        | Q96Q89            | M-phase phosphoprotein 1 (MPP1) (Kinesin-related motor interacting with PIN1) (Cancer/testis antigen 90) (CT90)                                                                                                                  | ATP binding; ATPase activity; WW domain binding; cell cycle arrest; cell division; centrosome; microtubule; microtubule motor activity; microtubule-based movement; mitosis; nucleolus; nucleoplasm; regulation of mitosis                                                                                                                                                                                                                                   | Cytoplasm. Nucleus.                                                                          | Kinesin-like protein family                       |
| 68 MYH10_HUMAN | MYH10                                | P35580            | Myosin-10 (Myosin heavy chain 10) (Myosin heavy chain, non-muscle IIB) (Non-muscle myosin heavy chain IIB) (NMMHC II-b) (NMMHC-IIb) (Cellular myosin heavy chain, type B) (Non-muscle myosin heavy chain B) (NMMHC-B)            | ADP binding; ATP binding; actin filament binding; actin filament-based movement; actin-dependent ATPase activity; calmodulin binding; cell cortex; cleavage furrow; cytokinesis after mitosis; microfilament motor activity; midbody; myosin complex; regulation of cell shape; stress fiber                                                                                                                                                                 |                                                                                              |                                                   |
| 69 MYL6_HUMAN  | MYL6                                 | P06660            | Myosin light polypeptide 6 (Smooth muscle and nonmuscle myosin light chain alkali 6) (Myosin light chain alkali 3) (Myosin light chain 3) (MLC-3) (LC17)                                                                         | actin-dependent ATPase activity; calcium ion binding; motor activity; muscle filament sliding; skeletal muscle tissue development; structural constituent of muscle; unconventional myosin complex                                                                                                                                                                                                                                                           |                                                                                              |                                                   |

| Entry name     | Gene names                                      | Uniprot Accession | Protein names                                                                                                                                                                                                                                                                                                                                                                    | Gene Ontology                                                                                                                                                                                                                                                                                                                                                                                                                                                                                                                                                       | Subcellular Localization                                                             | Protein family                                     |
|----------------|-------------------------------------------------|-------------------|----------------------------------------------------------------------------------------------------------------------------------------------------------------------------------------------------------------------------------------------------------------------------------------------------------------------------------------------------------------------------------|---------------------------------------------------------------------------------------------------------------------------------------------------------------------------------------------------------------------------------------------------------------------------------------------------------------------------------------------------------------------------------------------------------------------------------------------------------------------------------------------------------------------------------------------------------------------|--------------------------------------------------------------------------------------|----------------------------------------------------|
| 70 PDIA1_HUMAN | P4HB (ERBA2L) (PDI) (PDIA1) (PO4DB)             | P07237            | Protein disulfide-isomerase (PDI) (EC 5.3.4.1) (Prolyl 4-hydroxylase subunit beta) (Cellular thyroid hormone-binding protein) (p55)                                                                                                                                                                                                                                              | ER-Golgi intermediate compartment; cell redox homeostasis; cell surface; endoplasmic reticulum; endoplasmic reticulum lumen; extracellular region; melanosome; peptidyl-proline hydroxylation to 4-hydroxy-L-proline; plasma membrane; procollagen-proline 4-dioxygenase activity; protein binding; protein disulfide isomerase activity                                                                                                                                                                                                                            | Endoplasmic reticulum lumen. Melanosome. Cell membrane; Peripheral membrane protein. | Protein disulfide isomerase family                 |
| 71 PDIA4_HUMAN | PDIA4 (ERP70) (ERP72)                           | P13667            | Protein disulfide-isomerase A4 (EC 5.3.4.1) (Protein ERp-72) (ERp72)                                                                                                                                                                                                                                                                                                             | cell redox homeostasis; endoplasmic reticulum; endoplasmic reticulum lumen; melanosome; protein binding; protein disulfide isomerase activity; protein secretion                                                                                                                                                                                                                                                                                                                                                                                                    | Endoplasmic reticulum lumen. Melanosome.                                             | Protein disulfide isomerase family                 |
| 72 PECA1_HUMAN | PECAM1                                          | P16284            | Platelet endothelial cell adhesion molecule (PECAM-1) (EndoCAM) (GPIIA') (CD antigen CD31)                                                                                                                                                                                                                                                                                       | cell adhesion; cell recognition; extracellular space; integral to membrane; plasma membrane; platelet alpha granule membrane; protein binding; signal transduction                                                                                                                                                                                                                                                                                                                                                                                                  | Membrane; Single-pass type I membrane protein.                                       |                                                    |
| 73 PLF4_HUMAN  | PF4 (CXCL4) (SCYB4)                             | P02776            | Platelet factor 4 (PF-4) (C-X-C motif chemokine 4) (Oncostatin-A) (Iroplact) [Cleaved into: Platelet factor 4, short form]                                                                                                                                                                                                                                                       | chemokine activity; cytokine-mediated signaling pathway; extracellular space; heparin binding; immune response; leukocyte chemotaxis; negative regulation of MHC class II biosynthetic process; negative regulation of angiogenesis; negative regulation of apoptosis; negative regulation of cytolysis; negative regulation of megakaryocyte differentiation; platelet activation; platelet alpha granule lumen; positive regulation of foam cell differentiation; positive regulation of gene expression; positive regulation of tumor necrosis factor production | Secreted.                                                                            | Interocrine alpha (chemokine Cx) family            |
| 74 PNP_HUMAN   | NP (PNP)                                        | P00491            | Purine nucleoside phosphorylase (PNP) (EC 2.4.2.1) (Inosine phosphorylase)                                                                                                                                                                                                                                                                                                       | NAD biosynthesis via nicotinamide riboside salvage pathway; cytosol; drug binding; immune response; inosine catabolic process; nicotinamide riboside catabolic process; nucleoside binding; phosphate binding; positive regulation of T cell proliferation; positive regulation of alpha-beta T cell differentiation; purine binding; purine-nucleoside phosphorylase activity; response to drug; urate biosynthetic process                                                                                                                                        |                                                                                      | PNP/MTAP phosphorylase family                      |
| 75 PPIA_HUMAN  | PPP1A (PPP1A)                                   | P62136            | Serine/threonine-protein phosphatase PP1-alpha catalytic subunit (PP-1A) (EC 3.1.3.16)                                                                                                                                                                                                                                                                                           | cell cycle; cell division; cytoplasm; glycogen metabolic process; histone methyltransferase complex; iron ion binding; manganese ion binding; protein amino acid dephosphorylation; protein binding; protein serine/threonine phosphatase activity                                                                                                                                                                                                                                                                                                                  | Cytoplasm.                                                                           | PPP phosphatase family, PP-1 subfamily             |
| 76 PPIA_HUMAN  | PPIA (CYPA)                                     | P62937            | Peptidyl-prolyl cis-trans isomerase A (PPIase A) (Rotamase A) (EC 5.2.1.8) (Cyclophilin A) (Cyclosporin A-binding protein)                                                                                                                                                                                                                                                       | cytosol; extracellular region; initiation of viral infection; interspecies interaction between organisms; nucleus; peptide binding; peptidyl-prolyl cis-trans isomerase activity; protein folding; provirus integration; regulation of viral genome replication; unfolded protein binding; virion binding                                                                                                                                                                                                                                                           | Cytoplasm.                                                                           | Cyclophilin-type PPIase family, PPIase A subfamily |
| 77 PPIB_HUMAN  | PPIB (CYPB)                                     | P23284            | Peptidyl-prolyl cis-trans isomerase B (PPIase) (Rotamase) (EC 5.2.1.8) (Cyclophilin B) (S-cyclophilin) (SCYLP) (CYP-S1)                                                                                                                                                                                                                                                          | endoplasmic reticulum; endoplasmic reticulum lumen; melanosome; peptide binding; peptidyl-prolyl cis-trans isomerase activity; protein folding; unfolded protein binding                                                                                                                                                                                                                                                                                                                                                                                            | Endoplasmic reticulum lumen. Melanosome.                                             | Cyclophilin-type PPIase family, PPIase B subfamily |
| 78 PRAF3_HUMAN | ARL6IP5 (DERP11) (JWA) (PRA2) (PRAF3) (HSPC127) | O75915            | PRA1 family protein 3 (ADP-ribosylation factor-like protein 6-interacting protein 5) (ARL-6-interacting protein 5) (Aip-5) (Glutamate transporter EAAC1-interacting protein) (GTRAP3-18) (Prenylated Rab acceptor protein 2) (Protein JWA) (Dermal papilla-derived protein 11) (JM5) (Putative MAPK-activating protein PM27) (Cytoskeleton-related vitamin A-responsive protein) | L-glutamate transport; endoplasmic reticulum membrane; integral to membrane; protein binding                                                                                                                                                                                                                                                                                                                                                                                                                                                                        | Endoplasmic reticulum membrane; Multi-pass membrane protein. Cytoplasm.              | PRA1 family                                        |



| Entry name     | Gene names              | Uniprot Accession | Protein names                                                                                                                                                                                                                                                                                     | Gene Ontology                                                                                                                                                                                                                                                                                                                                                                                                                                                                                                                                                                                                                                                                                                                                                                                                                                                                                                                                                             | Subcellular Localization                                                               | Protein family                                                    |
|----------------|-------------------------|-------------------|---------------------------------------------------------------------------------------------------------------------------------------------------------------------------------------------------------------------------------------------------------------------------------------------------|---------------------------------------------------------------------------------------------------------------------------------------------------------------------------------------------------------------------------------------------------------------------------------------------------------------------------------------------------------------------------------------------------------------------------------------------------------------------------------------------------------------------------------------------------------------------------------------------------------------------------------------------------------------------------------------------------------------------------------------------------------------------------------------------------------------------------------------------------------------------------------------------------------------------------------------------------------------------------|----------------------------------------------------------------------------------------|-------------------------------------------------------------------|
| 79 PRDX6_HUMAN | PRDX6 (AOP2) (KIAA0106) | P30041            | Peroxiredoxin-6 (EC 1.11.1.15) (Antioxidant protein 2) (1-Cys peroxiredoxin) (1-Cys PRX) (Acidic calcium-independent phospholipase A2) (aiPLA2) (EC 3.1.1.1-) (Non-selenium glutathione peroxidase) (NSGPx) (EC 1.11.1.7) (24 kDa protein) (Liver 2D page spot 40) (Red blood cells page spot 12) | cell redox homeostasis; cytoplasmic vesicle; cytosol; lysosome; nucleus; oxidation reduction; peroxiredoxin activity; phospholipid catabolic process; response to oxidative stress                                                                                                                                                                                                                                                                                                                                                                                                                                                                                                                                                                                                                                                                                                                                                                                        | Cytoplasm. Lysosome. Cytoplasmic vesicle.                                              | AhpC/TSA family, Rehydrin subfamily                               |
| 80 PROF1_HUMAN | PFN1                    | P07737            | Profilin-1 (Profilin I)                                                                                                                                                                                                                                                                           | actin binding; actin cytoskeleton; actin cytoskeleton organization; cytoplasm                                                                                                                                                                                                                                                                                                                                                                                                                                                                                                                                                                                                                                                                                                                                                                                                                                                                                             | Cytoplasm ,cytoskeleton.                                                               | Profilin family                                                   |
| 81 PTN3_HUMAN  | PTPN3 (PTPH1)           | P26045            | Tyrosine-protein phosphatase non-receptor type 3 (EC 3.1.3.48) (Protein-tyrosine phosphatase H1) (PTP-H1)                                                                                                                                                                                         | cytoplasm; cytoskeletal protein binding; cytoskeleton; extrinsic to membrane; negative regulation of membrane protein ectodomain proteolysis; plasma membrane; protein amino acid dephosphorylation; protein tyrosine phosphatase activity                                                                                                                                                                                                                                                                                                                                                                                                                                                                                                                                                                                                                                                                                                                                | Cell membrane; Peripheral membrane protein; Cytoplasmic side. Cytoplasm ,cytoskeleton. | Protein-tyrosine phosphatase family, Non-receptor class subfamily |
| 82 PTRPJ_HUMAN | PTRPJ (DEP1)            | Q12913            | Receptor-type tyrosine-protein phosphatase eta (Protein-tyrosine phosphatase eta) (R-PTP-eta) (EC 3.1.3.48) (HPTP eta) (Protein-tyrosine phosphatase receptor type J) (Density-enhanced phosphatase 1) (DEP-1) (CD antigen CD148)                                                                 | cell junction; cell-cell signaling; integral to plasma membrane; nucleus; protein amino acid dephosphorylation; protein binding; transmembrane receptor protein tyrosine kinase signaling pathway; transmembrane receptor protein tyrosine phosphatase activity                                                                                                                                                                                                                                                                                                                                                                                                                                                                                                                                                                                                                                                                                                           | Membrane; Single-pass type I membrane protein.                                         | Protein-tyrosine phosphatase family, Receptor class 3 subfamily   |
| 83 QCRC1_HUMAN | UQCRC1                  | P31930            | Cytochrome b-c1 complex subunit 1, mitochondrial (Ubiquinol-cytochrome-c reductase complex core protein 1) (Core protein 1) (Complex III subunit 1)                                                                                                                                               | aerobic respiration; metalloendopeptidase activity; mitochondrial respiratory chain; protein binding; proteolysis; transport; ubiquinol-cytochrome-c reductase activity; zinc ion binding                                                                                                                                                                                                                                                                                                                                                                                                                                                                                                                                                                                                                                                                                                                                                                                 | Mitochondrion inner membrane.                                                          | Peptidase M16 family, UQCRC1/QCRC1 subfamily                      |
| 84 RAB32_HUMAN | RAB32                   | Q13637            | Ras-related protein Rab-32                                                                                                                                                                                                                                                                        | GTP binding; mitochondrion; protein transport; small GTPase mediated signal transduction                                                                                                                                                                                                                                                                                                                                                                                                                                                                                                                                                                                                                                                                                                                                                                                                                                                                                  | Mitochondrion.                                                                         | Small GTPase superfamily, Rab family                              |
| 85 RAP1A_HUMAN | RAP1A (KREV1)           | P62834            | Ras-related protein Rap-1A (GTP-binding protein smg-p21A) (Ras-related protein Krev-1) (C21KG) (G-22K)                                                                                                                                                                                            | GTP binding; GTPase activity; cell cycle; cytosol; negative regulation of cell cycle; plasma membrane                                                                                                                                                                                                                                                                                                                                                                                                                                                                                                                                                                                                                                                                                                                                                                                                                                                                     | Cell membrane; Lipid-anchor.                                                           | Small GTPase superfamily, Ras family                              |
| 86 RAP1B_HUMAN | RAP1B (OK/SW-cl.11)     | P61224            | Ras-related protein Rap-1b (GTP-binding protein smg p21B)                                                                                                                                                                                                                                         | GTP binding; cytosol; plasma membrane; small GTPase mediated signal transduction                                                                                                                                                                                                                                                                                                                                                                                                                                                                                                                                                                                                                                                                                                                                                                                                                                                                                          | Cell membrane. Cytoplasm ,cytosol.                                                     | Small GTPase superfamily, Ras family                              |
| 87 RHG08_HUMAN | ARHGAP8                 | P85298            | Rho GTPase-activating protein 8 (Rho-type GTPase-activating protein 8)                                                                                                                                                                                                                            | GTPase activator activity; intracellular; signal transduction                                                                                                                                                                                                                                                                                                                                                                                                                                                                                                                                                                                                                                                                                                                                                                                                                                                                                                             |                                                                                        |                                                                   |
| 88 RSU1_HUMAN  | RSU1 (RSP1)             | Q15404            | Ras suppressor protein 1 (Rsu-1) (RSP-1)                                                                                                                                                                                                                                                          | protein binding; signal transduction                                                                                                                                                                                                                                                                                                                                                                                                                                                                                                                                                                                                                                                                                                                                                                                                                                                                                                                                      |                                                                                        |                                                                   |
| 89 SEP11_HUMAN | 11-Sep                  | Q9NVA2            | Septin-11                                                                                                                                                                                                                                                                                         | GTP binding; cell cycle; cell division; nucleus; protein binding; protein heterooligomerization; septin complex; stress fiber                                                                                                                                                                                                                                                                                                                                                                                                                                                                                                                                                                                                                                                                                                                                                                                                                                             |                                                                                        | Septin family                                                     |
| 90 SNP23_HUMAN | SNAP23                  | O00161            | Synaptosomal-associated protein 23 (SNAP-23) (Vesicle-membrane fusion protein SNAP-23)                                                                                                                                                                                                            | cell junction; cytoplasm; membrane fusion; nucleus; post-Golgi vesicle-mediated transport; protein binding; protein transport; synapse; synaptosome; vesicle targeting                                                                                                                                                                                                                                                                                                                                                                                                                                                                                                                                                                                                                                                                                                                                                                                                    | Cell membrane; Peripheral membrane protein. Cell junction ,synapse ,synaptosome.       | SNAP-25 family                                                    |
| 91 SODC_HUMAN  | SOD1                    | P00441            | Superoxide dismutase [Cu-Zn] (EC 1.15.1.1)                                                                                                                                                                                                                                                        | DNA fragmentation involved in apoptosis; activation of MAPK activity; antioxidant activity; auditory receptor cell stereocilium organization; cell aging; cell soma; cellular iron ion homeostasis; chaperone binding; copper ion binding; cytoplasmic vesicle; cytosol; dendrite cytoplasm; double-strand break repair; embryo implantation; extracellular matrix; extracellular space; glutathione metabolic process; heart contraction; hydrogen peroxide biosynthetic process; locomotory behavior; mitochondrial matrix; muscle maintenance; myelin maintenance in the peripheral nervous system; myeloid cell homeostasis; negative regulation of cholesterol biosynthetic process; negative regulation of neuron apoptosis; neurofilament cytoskeleton organization; nucleus; ovarian follicle development; oxidation reduction; peroxisome; placenta development; positive regulation of apoptosis; positive regulation of cytokine production; protein transport | Cytoplasm.                                                                             | Cu-Zn superoxide dismutase family                                 |
| 92 SPB6_HUMAN  | SERPINB6 (PI6) (PTI)    | P35237            | Serpin B6 (Placental thrombin inhibitor) (Cytoplasmic antiproteinase) (CAP) (Proteinase inhibitor 6) (PI-6)                                                                                                                                                                                       | centrosome; cytosol; protein binding; serine-type endopeptidase inhibitor activity                                                                                                                                                                                                                                                                                                                                                                                                                                                                                                                                                                                                                                                                                                                                                                                                                                                                                        | Cytoplasm.                                                                             | Serpin family, Ov-serpin subfamily                                |

| Entry name | Gene names  | Uniprot Accession | Protein names | Gene Ontology                                                                                                                                 | Subcellular Localization                                                                                                                                                                                                                                                                                                                                               | Protein family                                                                                                            |                                       |
|------------|-------------|-------------------|---------------|-----------------------------------------------------------------------------------------------------------------------------------------------|------------------------------------------------------------------------------------------------------------------------------------------------------------------------------------------------------------------------------------------------------------------------------------------------------------------------------------------------------------------------|---------------------------------------------------------------------------------------------------------------------------|---------------------------------------|
| 93         | SPRC_HUMAN  | SPARC (ON)        | P09486        | SPARC (Secreted protein acidic and rich in cysteine) (Osteonectin) (ON) (Basement-membrane protein 40) (BM-40)                                | basement membrane; calcium ion binding; collagen binding; copper ion binding; extracellular space; ossification; platelet alpha granule lumen; transmembrane receptor protein tyrosine kinase signaling pathway                                                                                                                                                        | Secreted ,extracellular space ,extracellular matrix ,basement membrane.                                                   | SPARC family                          |
| 94         | SRGN_HUMAN  | SRGN (PRG)        | P10124        | Serglycin (Secretory granule proteoglycan core protein) (Platelet proteoglycan core protein) (P.PG) (Hematopoietic proteoglycan core protein) | Golgi apparatus; apoptosis; extracellular space; maintenance of granzyme B location in T cell secretory granule; maintenance of protease location in mast cell secretory granule; mast cell granule; negative regulation of bone mineralization; negative regulation of cytokine secretion; ossification; protein binding; protein maturation by peptide bond cleavage | Cytoplasmic granule. Secreted ,extracellular space. Golgi apparatus.                                                      | Serglycin family                      |
| 95         | SSF1_HUMAN  | PPAN (SSF1)       | Q9NQ55        | Suppressor of SWI4 1 homolog (Ssf-1) (Peter Pan homolog)                                                                                      | RNA splicing; nucleolus; protein binding                                                                                                                                                                                                                                                                                                                               | Nucleus ,nucleolus.                                                                                                       |                                       |
| 96         | STOM_HUMAN  | STOM (BND7)       | P27105        | Erythrocyte band 7 integral membrane protein (Stomatin) (Protein 7.2b)                                                                        | cytoskeleton; integral to plasma membrane; melanosome; membrane raft; protein binding; protein homooligomerization                                                                                                                                                                                                                                                     | Cell membrane; Single-pass membrane protein; Cytoplasmic side. Cell membrane; Lipid-anchor; Cytoplasmic side. Melanosome. | Band 7/mec-2 family                   |
| 97         | SYUA_HUMAN  | SNCA (NACP)       | P37840        | Alpha-synuclein (Non-A beta component of AD amyloid) (Non-A4 component of amyloid precursor) (NACP)                                           | axon; cell cortex; cytosol; growth cone; histone binding; negative regulation of histone acetylation; negative regulation of monoxygenase activity; nucleus; plasma membrane; regulation of dopamine secretion; response to interferon-gamma                                                                                                                           | Cytoplasm. Membrane. Nucleus.                                                                                             | Synuclein family                      |
| 98         | TBAL3_HUMAN | TUBAL3            | A6NHL2        | Tubulin alpha chain-like 3                                                                                                                    | GTP binding; GTPase activity; microtubule; microtubule-based movement; protein complex; protein polymerization; structural molecule activity                                                                                                                                                                                                                           |                                                                                                                           | Tubulin family                        |
| 99         | TPM2_HUMAN  | TPM2 (TMSB)       | P07951        | Tropomyosin beta chain (Tropomyosin-2) (Beta tropomyosin)                                                                                     | actin binding; muscle thin filament tropomyosin; regulation of ATPase activity; structural constituent of muscle                                                                                                                                                                                                                                                       | Cytoplasm ,cytoskeleton.                                                                                                  | Tropomyosin family                    |
| 100        | TPM3_HUMAN  | TPM3              | P06753        | Tropomyosin alpha-3 chain (Tropomyosin-3) (Gamma-tropomyosin) (Tropomyosin-5) (hTM5)                                                          | actin binding; cell motion; muscle thin filament tropomyosin; regulation of muscle contraction                                                                                                                                                                                                                                                                         | Cytoplasm ,cytoskeleton.                                                                                                  | Tropomyosin family                    |
| 101        | TPM4_HUMAN  | TPM4              | P67936        | Tropomyosin alpha-4 chain (Tropomyosin-4) (TM30p1)                                                                                            | actin binding; calcium ion binding; cell motion; muscle thin filament tropomyosin; structural constituent of muscle                                                                                                                                                                                                                                                    | Cytoplasm ,cytoskeleton.                                                                                                  | Tropomyosin family                    |
| 102        | TYB4_HUMAN  | TMSB4X (TB4X)     | P62328        | Thymosin beta-4 (T beta-4) (Fx) [Cleaved into: Hematopoietic system regulatory peptide (Seraspenside)]                                        | actin binding; actin cytoskeleton organization; cytoplasm; cytoskeleton; sequestering of actin monomers                                                                                                                                                                                                                                                                | Cytoplasm ,cytoskeleton.                                                                                                  | Thymosin beta family                  |
| 103        | VDAC2_HUMAN | VDAC2             | P45880        | Voltage-dependent anion-selective channel protein 2 (VDAC-2) (hVDAC2) (Outer mitochondrial membrane protein porin 2)                          | anion transport; integral to membrane; mitochondrial nucleoid; mitochondrial outer membrane; nucleotide binding; protein binding; voltage-gated anion channel activity                                                                                                                                                                                                 | Mitochondrion outer membrane.                                                                                             | Eukaryotic mitochondrial porin family |
| 104        | WASP_HUMAN  | WAS (IMD2)        | P42768        | Wiskott-Aldrich syndrome protein (WASp)                                                                                                       | actin cytoskeleton; blood coagulation; cytoplasm; defense response; epidermis development; identical protein binding; immune response; nucleus; small GTPase regulator activity                                                                                                                                                                                        | Cytoplasm ,cytoskeleton.                                                                                                  |                                       |
