# Supplementary material for: Proteomic and Phospho-Proteomic Profile of Human Platelets in Basal, Resting State: Insights into Integrin Signaling
Source: PubMed Central journal article supplement (PMC2762604; doi:10.1371/journal.pone.0007627), 2009-10-27
Supplement: pone.0007627.s012.pdf [file pone.0007627.s012.pdf]

| Protein Name | Uniprot Name | Other Names                          | Uniprot ID                                                             | Refseq IDs                                            | Protein Description                                                                                                                                                                                                                                                                                                                                                                                                                                                                                                                                                                                                                                      | GO ID                                                                                                                                                                                                                                                                                                                                                                              | GO terms                                                                                                                                                                                                                                                                                                                                                                                                                                                                                                                                                                                                                                                                                                                                                                                                                                                                                                                                                                                                                                                                                                                         | Subcellular location                         | Comments                         | Comments                       | Comments - Database Search            | Comments - Database Search         | Function |
|--------------|--------------|--------------------------------------|------------------------------------------------------------------------|-------------------------------------------------------|----------------------------------------------------------------------------------------------------------------------------------------------------------------------------------------------------------------------------------------------------------------------------------------------------------------------------------------------------------------------------------------------------------------------------------------------------------------------------------------------------------------------------------------------------------------------------------------------------------------------------------------------------------|------------------------------------------------------------------------------------------------------------------------------------------------------------------------------------------------------------------------------------------------------------------------------------------------------------------------------------------------------------------------------------|----------------------------------------------------------------------------------------------------------------------------------------------------------------------------------------------------------------------------------------------------------------------------------------------------------------------------------------------------------------------------------------------------------------------------------------------------------------------------------------------------------------------------------------------------------------------------------------------------------------------------------------------------------------------------------------------------------------------------------------------------------------------------------------------------------------------------------------------------------------------------------------------------------------------------------------------------------------------------------------------------------------------------------------------------------------------------------------------------------------------------------|----------------------------------------------|----------------------------------|--------------------------------|---------------------------------------|------------------------------------|----------|
| 1 ACTN1      | ACTN1_HUMAN  | ACTN1                                | P12814; Q9BTN1                                                         | NP_001093                                             | Alpha-actinin-1 (Alpha-actinin cytoskeletal isoform) (Non-muscle alpha-actinin-1) (F-actin cross-linking protein)                                                                                                                                                                                                                                                                                                                                                                                                                                                                                                                                        | GO:0003779; GO:0005509; GO:0005737; GO:0005856; GO:0005925; GO:0048041; GO:0061778                                                                                                                                                                                                                                                                                                 | actin binding; calcium ion binding; cytoplasm; cytoskeleton; focal adhesion; focal adhesion formation; integrin binding; negative regulation of cell motion; nucleus; pseudopodium; regulation of apoptosis; vinculin binding                                                                                                                                                                                                                                                                                                                                                                                                                                                                                                                                                                                                                                                                                                                                                                                                                                                                                                    | Cytoplasm;Cytoskeleton                       | Phosphorylated - from this Study | Membrane-Fraction - this study | Known in Uniprot to be phosphorylated | Known in HPRD to be phosphorylated |          |
| 2 F13A       | F13A_HUMAN   | F13A; Q59HA7; Q9BXZ9                 | P00488; Q59HA7; Q8N6X2; Q9BP24; Q9BXZ9                                 | NP_000120                                             | Coagulation factor XIII A chain (Coagulation factor XIIIa) (EC 2.2.1.3) (protein-glutamine gamma-glutamyltransferase A chain) (Transglutaminase A chain)                                                                                                                                                                                                                                                                                                                                                                                                                                                                                                 | GO:0008415; GO:0007596; GO:0005509; GO:0005737; GO:0005776; GO:0018149; GO:0003810                                                                                                                                                                                                                                                                                                 | acyltransferase activity; blood coagulation; calcium ion binding; cytoplasm; extracellular region; peptide cross-linking; protein-glutamine gamma-glutamyltransferase activity                                                                                                                                                                                                                                                                                                                                                                                                                                                                                                                                                                                                                                                                                                                                                                                                                                                                                                                                                   | Cytoplasm;Secreted                           |                                  | Membrane-Fraction - this study |                                       |                                    |          |
| 3 FIBA       | FIBA_HUMAN   | FIBA                                 | P02671; Q9BK62; Q9UIC2                                                 | NP_000499; NP_068657                                  | Fibrinogen alpha chain [Cleaved into: Fibrinopeptide A]                                                                                                                                                                                                                                                                                                                                                                                                                                                                                                                                                                                                  | GO:0043499; GO:0009897; GO:0005577; GO:0030168; GO:0031093; GO:0030674; GO:0051259; GO:0049109; GO:0034988; GO:0043498; GO:0048355; GO:0005737; GO:0005776; GO:0018149; GO:0003810                                                                                                                                                                                                 | eukaryotic cell surface binding; external side of plasma membrane; fibrinogen complex; platelet activation; platelet alpha granule lumen; protein binding; bridging; protein polymerization; receptor binding; response to calcium ion; signal transduction; rN-rN41192                                                                                                                                                                                                                                                                                                                                                                                                                                                                                                                                                                                                                                                                                                                                                                                                                                                          | Secreted                                     | Phosphorylated - from this Study | Membrane-Fraction - this study | Known in Uniprot to be phosphorylated | Known in HPRD to be phosphorylated |          |
| 4 FLNA       | FLNA_HUMAN   | Q6QFE6; Q5HY53; Q21333; Q8NF52; FLNA | P001447; NP_001104                                                     | NP_001447; XP_293276                                  | Filamin-A (Alpha-filamin) (Filamin-1) (Endothelial actin-binding protein) (Actin-binding protein 280) (ABP-280) (Non-muscle filamin); Filamin A, alpha (Actin binding protein 280) (Filamin A, alpha (Actin binding protein 280), isoform CRA_c); Filamin A                                                                                                                                                                                                                                                                                                                                                                                              | GO:0006928; GO:0009986; GO:0005737; GO:0042802; GO:0005634; GO:0006446; GO:0009408; GO:0031132; GO:0030866; GO:0005737; GO:0002144; GO:0030845; GO:0007229; GO:0005624; GO:0045744; GO:0009409; GO:0010920; GO:0042301; GO:0043251; GO:0030384; GO:0032233; GO:0030836; GO:0010925; GO:0033625; GO:0042803; GO:0005800; GO:0006005; GO:0032587; GO:0005625; GO:0070493; GO:0006904 | Fc-gamma receptor 1 complex binding; GTP-Ral binding; Rac GTPase binding; actin crosslink formation; actin cytoskeleton; actin cytoskeleton reorganization; actin filament binding; cytoplasm; cytoplasmic sequestering of protein; glycoprotein binding; inhibition of adenylate cyclase activity by dopamine receptor signaling pathway; negative regulation of protein catabolic process; negative regulation of transcription factor activity; nucleus; plasma membrane; positive regulation of I-kappaB kinase/NF-kappaB cascade; positive regulation of transcription factor import into nucleus; protein homodimerization activity; protein localization at cell surface; protein stabilization; receptor clustering; signal transducer activity; transcription factor binding; actin binding;                                                                                                                                                                                                                                                                                                                            | Cytoplasm;CellCortex;Cytoplasm;Cytoskeleton; | Phosphorylated - from this Study | Membrane-Fraction - this study | Known in Uniprot to be phosphorylated | Known in HPRD to be phosphorylated |          |
| 5 GP1BB      | GP1BB_HUMAN  | GP1BB                                | P12244; Q14422; Q8NG40                                                 | NP_000398                                             | Platelet glycoprotein IIb beta chain (GP-IIb beta) (GPIIb-beta) (GP130) (Antigen CD42b-beta) (CD antigen CD42c)                                                                                                                                                                                                                                                                                                                                                                                                                                                                                                                                          | GO:0007155; GO:0007156; GO:0005887; GO:0030168; GO:0031092; GO:0005634; GO:0005886; GO:0043123; GO:0042993; GO:0042803; GO:0058021; GO:0043113; GO:0004871; GO:0007155; GO:0007156; GO:0005887; GO:0030168; GO:0031092; GO:0005634; GO:0005886; GO:0043123; GO:0042993; GO:0042803; GO:0058021; GO:0043113; GO:0004871                                                             | cell adhesion; cell surface receptor linked signal transduction; integral to plasma membrane; platelet activation; platelet alpha granule membrane; protein binding; transmembrane receptor activity                                                                                                                                                                                                                                                                                                                                                                                                                                                                                                                                                                                                                                                                                                                                                                                                                                                                                                                             | Membrane;SinglePass;TypeI                    | Phosphorylated - from this Study | Membrane-Fraction - this study | Known in Uniprot to be phosphorylated | Known in HPRD to be phosphorylated |          |
| 6 HSPB1      | HSPB1_HUMAN  | HSPB1; B2RN48                        | P04792; B2RN48; Q67477; Q9SCZ0; Q9G6I7; Q9UCJ1; Q9UC34; Q9UC35; P08567 | NP_001531; XP_293276                                  | Heat shock protein beta-1 (HspB1) (Heat shock 27 kDa protein) (HSP 27) (Stress-responsive protein 27) (SRP27) (Estrogen-regulated 24 kDa protein) (28 kDa heat shock protein)                                                                                                                                                                                                                                                                                                                                                                                                                                                                            | GO:0006928; GO:0009986; GO:0005737; GO:0042802; GO:0005634; GO:0006446; GO:0009408; GO:0031132; GO:0030866; GO:0005737; GO:0002144; GO:0030845; GO:0007229; GO:0005624; GO:0045744; GO:0009409; GO:0010920; GO:0042301; GO:0043251; GO:0030384; GO:0032233; GO:0030836; GO:0010925; GO:0033625; GO:0042803; GO:0005800; GO:0006005; GO:0032587; GO:0005625; GO:0070493; GO:0006904 | anti-apoptosis; cell motion; cell surface; cytoplasm; identical protein binding; nucleus; regulation of translational initiation; response to heat; response to unfolded protein; spindle                                                                                                                                                                                                                                                                                                                                                                                                                                                                                                                                                                                                                                                                                                                                                                                                                                                                                                                                        | Cytoplasm;Nucleus;Spin                       | Phosphorylated - from this Study | Membrane-Fraction - this study | Known in Uniprot to be phosphorylated | Known in HPRD to be phosphorylated |          |
| 7 PLEK       | PLEK_HUMAN   | PLEK; B2R9E8                         | P02671; Q9BK62; Q9UIC2                                                 | NP_002655                                             | Pleckstrin (Plektin p47 protein)                                                                                                                                                                                                                                                                                                                                                                                                                                                                                                                                                                                                                         | GO:0006928; GO:0009986; GO:0005737; GO:0042802; GO:0005634; GO:0006446; GO:0009408; GO:0031132; GO:0030866; GO:0005737; GO:0002144; GO:0030845; GO:0007229; GO:0005624; GO:0045744; GO:0009409; GO:0010920; GO:0042301; GO:0043251; GO:0030384; GO:0032233; GO:0030836; GO:0010925; GO:0033625; GO:0042803; GO:0005800; GO:0006005; GO:0032587; GO:0005625; GO:0070493; GO:0006904 | actin cytoskeleton reorganization; cortical actin cytoskeleton organization; cytoplasm; hemopoietic progenitor cell differentiation; inhibition of phospholipase C activity involved in G-protein coupled receptor signaling pathway; integrin-mediated signaling pathway; membrane fraction; negative regulation of G-protein coupled receptor protein signaling pathway; negative regulation of calcium-mediated signaling; negative regulation of inositol phosphate biosynthetic process; phosphate binding; phosphatidylinositol 3,4-bisphosphate binding; phosphonitride metabolic process; platelet degranulation; positive regulation of actin filament bundle formation; positive regulation of actin filament depolymerization; positive regulation of inositol-polyphosphate 5-phosphatase activity; positive regulation of integrin activation; positive regulation of platelet activation; protein homodimerization activity; protein kinase C binding; regulation of cell diameter; ruffle membrane; ruffle organization; soluble fraction; thrombin receptor signaling pathway; vesicle docking during exocytosis |                                              | Phosphorylated - from this Study | Membrane-Fraction - this study | Known in Uniprot to be phosphorylated | Known in HPRD to be phosphorylated |          |
| 8 SCYB7      | SCYB7_HUMAN  | SCYB7; CXL7; B2BSF3                  | P02775; Q6IB38; B2BSF3                                                 | NP_002695                                             | Platelet basic protein (BPB) (C-X-C motif chemokine 7) (Small-inducible cytokine B7) (Leukocyte-derived growth factor) (LDGF) (Macrophage-derived growth factor) (MDGF) [Cleaved into: Connective tissue-activating peptide III (CTAP-III) (Low-affinity platelet factor IV) (LA-PF4); TC-2; Connective tissue-activating peptide III(1-81) (CTAP-III(1-81)); Beta-thromboglobulin (Beta-TG); Neutrophil-activating peptide 2(74) (NAP-2(74)); Neutrophil-activating peptide 2(73) (NAP-2(73)); Neutrophil-activating peptide 2 (NAP-2); TC-1; Neutrophil-activating peptide 2(1-66) (NAP-2(1-66)); Neutrophil-activating peptide 2(1-63) (NAP-2(1-63))] | GO:0008283; GO:0008009; GO:0006935; GO:0042742; GO:0005615; GO:0005356; GO:0015758; GO:0008083; GO:0006955; GO:0031093                                                                                                                                                                                                                                                             | cell proliferation; chemokine activity; chemotaxis; defense response to bacteria; extracellular space; glucose transmembrane transporter activity; glucose transport; growth factor activity; immune response; platelet alpha granule lumen                                                                                                                                                                                                                                                                                                                                                                                                                                                                                                                                                                                                                                                                                                                                                                                                                                                                                      | Secreted                                     | Phosphorylated - from this Study | Membrane-Fraction - this study | Known in Uniprot to be phosphorylated |                                    |          |
| 9 TAGL2      | TAGL2_HUMAN  | TAGL2; Q6FG11                        | P37802; Q6FG11; Q5IR06; Q5IRQ7; Q9BUH5; Q9H490                         | NP_003555                                             | Transgelin-2 (SM22-alpha homolog)                                                                                                                                                                                                                                                                                                                                                                                                                                                                                                                                                                                                                        | GO:0005856; GO:0007517; GO:0031965; GO:0005886; GO:0005515                                                                                                                                                                                                                                                                                                                         | cytoskeleton; muscle organ development; nuclear membrane; plasma membrane; protein binding                                                                                                                                                                                                                                                                                                                                                                                                                                                                                                                                                                                                                                                                                                                                                                                                                                                                                                                                                                                                                                       |                                              | Phosphorylated - from this Study | Membrane-Fraction - this study | Known in Uniprot to be phosphorylated |                                    |          |
| 10 CSRP1     | CSRP1_HUMAN  | CSRP1; Q5U012                        | P02291; Q5U012                                                         | NP_004069                                             | Cysteine and glycine-rich protein 1 (Cysteine-rich protein 1) (CRP1) (CRP); Cysteine and glycine-rich protein 1 (cDNA FL75177; highly similar to Homo sapiens cysteine and glycine-rich protein 1 (CSRP1), mRNA) (Cysteine and glycine-rich protein 1, isoform CRA_b)                                                                                                                                                                                                                                                                                                                                                                                    | GO:0005634; GO:0008270; GO:0005515                                                                                                                                                                                                                                                                                                                                                 | nucleus; zinc ion binding; protein binding                                                                                                                                                                                                                                                                                                                                                                                                                                                                                                                                                                                                                                                                                                                                                                                                                                                                                                                                                                                                                                                                                       | Nucleus;                                     | Phosphorylated - from this Study | Membrane-Fraction - this study | Known in Uniprot to be phosphorylated |                                    |          |
| 11 SDRP      | SDRP_HUMAN   | SDRP                                 | O95810                                                                 | NP_004648                                             | Serum deprivation-response protein (Phosphatidylserine-binding protein) (PS-p68)                                                                                                                                                                                                                                                                                                                                                                                                                                                                                                                                                                         | GO:0005829; GO:0016020; GO:0001786; GO:0005662; GO:0006270; GO:0006268; GO:0003705; GO:0003694; GO:0000794; GO:0003697; GO:0008134; GO:0046332; GO:0005737; GO:0004892; GO:0007399; GO:0008284; GO:0008290; GO:0003779; GO:0051016; GO:0005099; GO:0005099; GO:0005737; GO:0005516; GO:0051056; GO:0005099; GO:0006212; GO:0005515                                                 | cytosol; membrane; phosphatidylserine binding; protein binding                                                                                                                                                                                                                                                                                                                                                                                                                                                                                                                                                                                                                                                                                                                                                                                                                                                                                                                                                                                                                                                                   | Cytoplasm;Cytosol;Membrane;Aveola            | Phosphorylated - from this Study | Membrane-Fraction - this study | Known in Uniprot to be phosphorylated |                                    |          |
| 12 PURA      | PURA_HUMAN   | PURA; Q56A79                         | Q00577; Q56A79                                                         | NP_005850                                             | Transcription activator protein Pur-alpha (Purine-rich single-stranded DNA-binding protein alpha); Purine-rich element binding protein A                                                                                                                                                                                                                                                                                                                                                                                                                                                                                                                 | GO:0005829; GO:0005662; GO:0006270; GO:0006268; GO:0003705; GO:0003694; GO:0000794; GO:0003697; GO:0008134; GO:0046332; GO:0005737; GO:0004892; GO:0007399; GO:0008284; GO:0008290; GO:0003779; GO:0051016; GO:0005099; GO:0005099; GO:0005737; GO:0005516; GO:0051056; GO:0005099; GO:0006212; GO:0005515                                                                         | DNA replication factor A complex; DNA replication initiation; DNA unwinding during replication; RNA polymerase II transcription factor activity; enhancer binding; double-stranded telomeric DNA binding; nuclear chromosome, telomeric region; single-stranded DNA binding; transcription factor binding; SMAD binding; cytoplasm; negative regulation of transcription, DNA-dependent; nervous system development; positive regulation of cell proliferation; transcription factor activity                                                                                                                                                                                                                                                                                                                                                                                                                                                                                                                                                                                                                                    | Nucleus;                                     | Phosphorylated - from this Study | Membrane-Fraction - this study | Known in Uniprot to be phosphorylated |                                    |          |
| 13 CAZA1     | CAZA1_HUMAN  | CAZA1                                | P52907; Q53F06; Q6FHDS; Q13576; Q59HA3                                 | NP_006126                                             | F-actin-capping protein subunit alpha-1 (CapZ alpha-1)                                                                                                                                                                                                                                                                                                                                                                                                                                                                                                                                                                                                   | GO:0008294; GO:0008290; GO:0003779; GO:0051016; GO:0005099; GO:0005099; GO:0003779; GO:0015620; GO:0005516; GO:0051056; GO:0005099; GO:0006212; GO:0005515                                                                                                                                                                                                                         | F-actin capping protein complex; actin binding; barbed-end actin filament capping; cell motion                                                                                                                                                                                                                                                                                                                                                                                                                                                                                                                                                                                                                                                                                                                                                                                                                                                                                                                                                                                                                                   |                                              | Membrane-Fraction - this study   |                                |                                       |                                    |          |
| 14 IQGA2     | IQGA2_HUMAN  | IQGA2; Q59HA3                        | Q00624                                                                 | NP_006624                                             | Ras GTPase-activating-like protein IQGAP2; IQ motif containing GTPase activating protein 2 variant (Fragment)                                                                                                                                                                                                                                                                                                                                                                                                                                                                                                                                            | GO:0005829; GO:0005662; GO:0006270; GO:0006268; GO:0003705; GO:0003694; GO:0000794; GO:0003697; GO:0008134; GO:0046332; GO:0005737; GO:0004892; GO:0007399; GO:0008284; GO:0008290; GO:0003779; GO:0051016; GO:0005099; GO:0005099; GO:0005737; GO:0005516; GO:0051056; GO:0005099; GO:0006212; GO:0005515                                                                         | regulation of small GTPase mediated signal transduction; Ras GTPase activator activity; actin binding; actin cytoskeleton; calmodulin binding; cytoplasm; integrin binding; SMAD binding; cytoplasm; negative regulation of transcription, DNA-dependent; nervous system development; positive regulation of cell proliferation; transcription factor activity                                                                                                                                                                                                                                                                                                                                                                                                                                                                                                                                                                                                                                                                                                                                                                   |                                              | Phosphorylated - from this Study | Membrane-Fraction - this study | Known in Uniprot to be phosphorylated |                                    |          |
| 15 SCAM2     | SCAM2_HUMAN  | SCAM2; B2RDF0                        | O15127; Q9BQ86; B2RDF0                                                 | NP_005688                                             | Secretory carrier-associated membrane protein 2 (Secretory carrier membrane protein 2)                                                                                                                                                                                                                                                                                                                                                                                                                                                                                                                                                                   | GO:0016021; GO:0006892; GO:0005515; GO:0015031; GO:0059038; GO:0032588                                                                                                                                                                                                                                                                                                             | integral to membrane; post-Golgi vesicle-mediated transport; protein binding; protein transport; recycling endosome membrane; trans-Golgi network membrane                                                                                                                                                                                                                                                                                                                                                                                                                                                                                                                                                                                                                                                                                                                                                                                                                                                                                                                                                                       | Golgiapparatus;TransGo                       | Phosphorylated - from this Study | Membrane-Fraction - this study | Known in Uniprot to be phosphorylated |                                    |          |
| 16 GTR3      | GTR3_HUMAN   | GTR3; B2R606                         | P11699; Q619U2; Q9UG15; B2R606                                         | NP_008862                                             | Solute carrier family 2, facilitated glucose transporter member 3 (Glucose transporter type 3 brain) (GLUT-3)                                                                                                                                                                                                                                                                                                                                                                                                                                                                                                                                            | GO:0005975; GO:0005355; GO:0015758; GO:0016021; GO:0005886; GO:0005515; GO:0005514; GO:0006006                                                                                                                                                                                                                                                                                     | carbohydrate metabolic process; cytoplasm; glucose transmembrane transporter activity; glucose transport; integral to membrane; plasma membrane; sugar-hydrogen symporter activity; transmembrane transport                                                                                                                                                                                                                                                                                                                                                                                                                                                                                                                                                                                                                                                                                                                                                                                                                                                                                                                      | Membrane;MultiPass;MembraneProtein           | Phosphorylated - from this Study | Membrane-Fraction - this study | Known in Uniprot to be phosphorylated |                                    |          |
| 17 G3P       | G3P_HUMAN    | G3P; Q53X65                          | P04406; Q53X65; P00354                                                 | NP_002037; XP_294070; XP_294015; XP_291603; XP_210460 | Glyceraldehyde-3-phosphate dehydrogenase (GAPDH) (EC 1.2.1.12); Glyceraldehyde 3-phosphate dehydrogenase (EC 1.2.1.12) (Fragment)                                                                                                                                                                                                                                                                                                                                                                                                                                                                                                                        | GO:0005975; GO:0005355; GO:0015758; GO:0016021; GO:0005886; GO:0005515; GO:0005514; GO:0006006                                                                                                                                                                                                                                                                                     | NAD or NADH binding; cytoplasm; glyceraldehyde-3-phosphate dehydrogenase (phosphorylated) activity; glycolysis; membrane; oxidation reduction; protein binding; glucose metabolic process                                                                                                                                                                                                                                                                                                                                                                                                                                                                                                                                                                                                                                                                                                                                                                                                                                                                                                                                        | Cytoplasm;Cytoplasm;Membrane                 | Phosphorylated - from this Study | Membrane-Fraction - this study | Known in Uniprot to be phosphorylated |                                    |          |



| Protein Name | Uniprot Name | Other Names                    | Uniprot Refseq IDs                                             | Protein Description             | GO ID                                                                                                                                                                                                                                                                                                                                                                   | GO terms                                                                                                                                                                                                                                                                                                                                                                                                                                                   | Subcellular location                                                                                                                                                                                                                                                                                                                                                                                                                                                                                                                                                                                                                                                                                                                                                                                                                                                                                                                                                                            | Comments                                        | Comments                         | Comments - Database Search            | Comments - Database Search            | Function                           |
|--------------|--------------|--------------------------------|----------------------------------------------------------------|---------------------------------|-------------------------------------------------------------------------------------------------------------------------------------------------------------------------------------------------------------------------------------------------------------------------------------------------------------------------------------------------------------------------|------------------------------------------------------------------------------------------------------------------------------------------------------------------------------------------------------------------------------------------------------------------------------------------------------------------------------------------------------------------------------------------------------------------------------------------------------------|-------------------------------------------------------------------------------------------------------------------------------------------------------------------------------------------------------------------------------------------------------------------------------------------------------------------------------------------------------------------------------------------------------------------------------------------------------------------------------------------------------------------------------------------------------------------------------------------------------------------------------------------------------------------------------------------------------------------------------------------------------------------------------------------------------------------------------------------------------------------------------------------------------------------------------------------------------------------------------------------------|-------------------------------------------------|----------------------------------|---------------------------------------|---------------------------------------|------------------------------------|
| 31 VINC      | VINC_HUMAN   | VINC                           | Q55WZ2; P18206; Q14450; Q72388; Q8DXU7                         | NP_003354; NP_054706            | Vinculin (Metavinculin)                                                                                                                                                                                                                                                                                                                                                 | GO:0003779; GO:0015629; GO:0045294; GO:0004327; GO:0007155; GO:0005911; GO:0043034; GO:0005925; GO:0005917                                                                                                                                                                                                                                                                                                                                                 | actin binding; actin cytoskeleton; alpha-catenin binding; apical junction assembly; cell adhesion; cell-cell junction; actinostem; focal adhesion; lamellipodium assembly; negative regulation of cell migration; oxidoreductase activity; protein complex; structural molecule activity                                                                                                                                                                                                                                                                                                                                                                                                                                                                                                                                                                                                                                                                                                        | Cytoplasm;cytoskeleton;Celljunctionadherensjunc | Phosphorylated - from this Study | Membrane-Fraction - this study        | Known in Uniprot to be phosphorylated | Known in HPRD to be phosphorylated |
| 32 ACTG      | ACTG_HUMAN   | ACTG; Q5U032                   | P63261; Q5U032; AKK7C2; P02571; P02571; P14104; P99022; Q966E7 | NP_001605; XP_301187; XP_302052 | Actin, cytoplasmic 2 (Gamma-actin) [Cleaved into: Actin, cytoplasmic 2, N-terminally processed]                                                                                                                                                                                                                                                                         | GO:0005524; GO:0006928; GO:0005137; GO:0005856; GO:0042802; GO:0005737; GO:0005515                                                                                                                                                                                                                                                                                                                                                                         | ATP binding; cell motion; cytoplasm; cytoskeleton; identical protein binding; sensory perception of sound; structural constituent of cytoskeleton                                                                                                                                                                                                                                                                                                                                                                                                                                                                                                                                                                                                                                                                                                                                                                                                                                               | Cytoplasm;cytoskeleton                          | Phosphorylated - from this Study |                                       | Known in Uniprot to be phosphorylated |                                    |
| 33 ACTH      | ACTH_HUMAN   | ACTH                           | P63267; Q504R1; B2R7E7; P12718; Q6122                          | NP_001606                       | Actin, gamma-enteric smooth muscle (Smooth muscle gamma-actin) (Gamma-2-actin) (Alpha-actin-3)                                                                                                                                                                                                                                                                          | GO:0005524; GO:0005737; GO:0005856; GO:0005515                                                                                                                                                                                                                                                                                                                                                                                                             | ATP binding; cytoplasm; cytoskeleton; protein binding                                                                                                                                                                                                                                                                                                                                                                                                                                                                                                                                                                                                                                                                                                                                                                                                                                                                                                                                           | Cytoplasm;cytoskeleton                          | Phosphorylated - from this Study |                                       |                                       |                                    |
| 34 ADAM9     | ADAM9_HUMAN  | ADAM9                          | Q13443; Q10718; Q8NPM6                                         | NP_003807; NP_001005            | Disintegrin and metalloproteinase domain-containing protein 9 (ADAM 9) (EC 3.4.24.4.) (Metalloproteinase/disintegrin/cysteine-rich protein 9) (Myeloma cell metalloproteinase (Meltin-gamma) (Cellular disintegrin-related protein)                                                                                                                                     | GO:0051088; GO:0017124; GO:0000186; GO:0033631; GO:0007160; GO:0005915; GO:0005615; GO:0016021; GO:0005178; GO:0007229; GO:0031233; GO:0030216; GO:0042336; GO:0004222; GO:0042117; GO:0042301; GO:0033630; GO:0051549; GO:0051044; GO:0050714; GO:0005900; GO:0051592; GO:0051384; GO:0042542; GO:0010042; GO:0034612; GO:0007179; GO:0008270                                                                                                             | PMA-inducible membrane protein ectodomain proteolysis; SH3 domain binding; activation of MAPK activity; cell-cell adhesion mediated by integrin; cell-matrix adhesion; collagen binding; extracellular space; integral to membrane; integrin binding; integrin-mediated signaling pathway; intrinsic to external side of plasma membrane; keratinocyte differentiation; laminin binding; metalloendopeptidase activity; monocyte activation; phosphate binding; positive regulation of cell adhesion mediated by integrin; positive regulation of keratinocyte migration; positive regulation of macrophage fusion; positive regulation of membrane protein ectodomain proteolysis; positive regulation of protein secretion; protein kinase C binding; response to calcium ion; response to glucocorticoid stimulus; response to hydrogen peroxide; response to manganese ion; response to tumor necrosis factor; transforming growth factor beta receptor signaling pathway; zinc ion binding | CellmembraneSinglepass;stypellmembraneprotein   | Phosphorylated - from this Study |                                       | Known in Uniprot to be phosphorylated |                                    |
| 35 FETUA     | FETUA_HUMAN  | FETUA                          | P02765; AKR9N6; Q14961; Q14962; Q9P152                         | NP_001613                       | Alpha-2-HS-glycoprotein (Ba-alpha-2-glycoprotein) (Alpha-2-Z-globulin) (Fetuin-A) [Cleaved into: Alpha-2-HS-glycoprotein chain A; Alpha-2-HS-glycoprotein chain B]                                                                                                                                                                                                      | GO:0006953; GO:0004869; GO:0005615; GO:0030502; GO:0046627; GO:0006907; GO:0005076; GO:0005515; GO:0008060; GO:0005794; GO:0005886; GO:0005915; GO:0032312; GO:0008270                                                                                                                                                                                                                                                                                     | acute-phase response; cysteine-type endopeptidase inhibitor activity; extracellular space; negative regulation of bone mineralization; negative regulation of insulin receptor signaling pathway; pinocytosis; positive regulation of phagocytosis; protein binding; regulation of inflammatory response                                                                                                                                                                                                                                                                                                                                                                                                                                                                                                                                                                                                                                                                                        | Secreted                                        | Phosphorylated - from this Study |                                       | Known in Uniprot to be phosphorylated | Known in HPRD to be phosphorylated |
| 36 DDEF2     | DDEF2_HUMAN  | DDEF2; ASAP2                   | Q43150                                                         | NP_003878; NP_001128            | Arf-GAP with SH3 domain, ANK repeat and PH domain-containing protein 2 (Development and differentiation-enhancing factor 2) (Pyk2 C-terminus-associated protein) (PAF) (Favulin-associated protein with ARFGAP activity 3) (PAG3)                                                                                                                                       | GO:0005727; GO:0005187; GO:0005794; GO:0005886; GO:0005915; GO:0032312; GO:0008270                                                                                                                                                                                                                                                                                                                                                                         | actin binding; actin cytoskeleton; actin filament bundle formation; barbed-end actin filament capping; cytoplasm                                                                                                                                                                                                                                                                                                                                                                                                                                                                                                                                                                                                                                                                                                                                                                                                                                                                                | Cytoplasm                                       | Phosphorylated - from this Study |                                       | Known in Uniprot to be phosphorylated | Known in HPRD to be phosphorylated |
| 37 DEMA      | DEMA_HUMAN   | DEMA                           | Q08495; AKK0T5; B3K970; Q13215; Q9BRE3                         | NP_001969; NP_001107            | Dematin (Erythrocyte membrane protein band 4.9)                                                                                                                                                                                                                                                                                                                         | GO:0003779; GO:0015629; GO:0051017; GO:0051016; GO:0005737                                                                                                                                                                                                                                                                                                                                                                                                 | actin binding; actin cytoskeleton; actin filament bundle formation; barbed-end actin filament capping; cytoplasm                                                                                                                                                                                                                                                                                                                                                                                                                                                                                                                                                                                                                                                                                                                                                                                                                                                                                | Cytoplasm                                       | Phosphorylated - from this Study |                                       | Known in Uniprot to be phosphorylated | Known in HPRD to be phosphorylated |
| 38 EP15      | EP15_HUMAN   | EP15; EPS15                    | P42566; Q5SRH4; B2R8J7                                         | NP_001972                       | Epidermal growth factor receptor substrate 15 (Protein Ep15) (Protein AF-1p)                                                                                                                                                                                                                                                                                            | GO:0017124; GO:0005509; GO:0008283; GO:0005905; GO:0005829; GO:0031901; GO:0007173; GO:0015031; GO:0016050                                                                                                                                                                                                                                                                                                                                                 | SH3 domain binding; calcium ion binding; cell proliferation; coated pit; cytosol; early endosome membrane; epidermal growth factor receptor signaling pathway; protein transport; vesicle organization                                                                                                                                                                                                                                                                                                                                                                                                                                                                                                                                                                                                                                                                                                                                                                                          | Cytoplasm;Cellmembranep                         | Phosphorylated - from this Study |                                       | Known in Uniprot to be phosphorylated | Known in HPRD to be phosphorylated |
| 39 KNG1      | KNG1_HUMAN   | KNG1; Q05CF8                   | P01042; AKK474; B2KRC2; P01043; Q53EQ0; Q5PAU9; Q7M4P1; Q05CF8 | NP_000884; NP_001095            | Kinogen-1 (High molecular weight kininogen) (HKW) (Williams-Fitzgerald-Flauejac factor) (Fitzgerald factor) (Alpha-2-thiol proteinase inhibitor) [Cleaved into: Kininogen-1 heavy chain; T-kinin (Ile-Ser-Bradykinin); Bradykinin (Kallidin III); Lysyl-bradykinin (Kallidin III); Kininogen-1 light chain; Low molecular weight growth-promoting factor]; KNG1 protein | GO:0005031; GO:0004869; GO:0030146; GO:0005905; GO:0005576; GO:0008201; GO:0006954; GO:0030147; GO:0030195; GO:0007162; GO:0005634; GO:0043065; GO:0005524; GO:0005794; GO:0030218; GO:0044419; GO:0045121; GO:0004715; GO:0005634; GO:0005886; GO:0008284; GO:0042531; GO:0005515; GO:0004716; GO:0016334; GO:0050839; GO:0005737; GO:0008092; GO:0005856; GO:0019898; GO:0030175; GO:0007159; GO:0005900; GO:0022614; GO:0005737; GO:0005515; GO:0004871 | centrosome; cysteine-type endopeptidase inhibitor activity; diuresis; elevation of cytosolic calcium ion concentration; extracellular region; heparin binding; inflammatory response; natriuresis; negative regulation of blood coagulation; negative regulation of cell adhesion; nucleus; positive regulation of apoptosis; receptor binding; smooth muscle contraction; vasodilation; zinc ion binding; cysteine-type endopeptidase inhibitor activity                                                                                                                                                                                                                                                                                                                                                                                                                                                                                                                                       | Secreted;Paced;                                 | Phosphorylated - from this Study |                                       | Known in Uniprot to be phosphorylated | Known in HPRD to be phosphorylated |
| 40 LYN       | LYN_HUMAN    | LYN                            | P07948; A0A0VQ2                                                | NP_002341                       | Tyrosine-protein kinase Lyn (EC 2.7.10.2)                                                                                                                                                                                                                                                                                                                               | GO:0005524; GO:0005794; GO:0030218; GO:0044419; GO:0045121; GO:0004715; GO:0005634; GO:0005886; GO:0008284; GO:0042531; GO:0005515; GO:0004716; GO:0016334; GO:0050839; GO:0005737; GO:0008092; GO:0005856; GO:0019898; GO:0030175; GO:0007159; GO:0005900; GO:0022614; GO:0005737; GO:0005515; GO:0004871                                                                                                                                                 | ATP binding; Golgi apparatus; thymocyte differentiation; interspecies interaction between organisms; membrane raft; non-membrane spanning protein tyrosine kinase activity; nucleus; plasma membrane; positive regulation of cell proliferation; positive regulation of tyrosine phosphorylation of STAT protein; protein binding; receptor signaling protein tyrosine kinase activity; response to hormone stimulus                                                                                                                                                                                                                                                                                                                                                                                                                                                                                                                                                                            | Phosphorylated - from this Study                |                                  | Known in Uniprot to be phosphorylated | Known in HPRD to be phosphorylated    | Kinase                             |
| 41 MOES      | MOES_HUMAN   | MOES                           | P26038                                                         | NP_002435; XP_171113            | Moesin (Membrane-organizing extension spike protein)                                                                                                                                                                                                                                                                                                                    | GO:0016334; GO:0050839; GO:0005737; GO:0008092; GO:0005856; GO:0019898; GO:0030175; GO:0007159; GO:0005900; GO:0022614; GO:0005737; GO:0005515; GO:0004871                                                                                                                                                                                                                                                                                                 | apical plasma membrane; cell adhesion molecule binding; cytoplasm; cytoskeletal protein binding; cytoskeleton; extrinsic to membrane; filopodium; leukocyte adhesion; membrane docking; microvillus; receptor binding; structural constituent of cytoskeleton                                                                                                                                                                                                                                                                                                                                                                                                                                                                                                                                                                                                                                                                                                                                   | CellmembranePeripheralmembraneproteinCyt        | Phosphorylated - from this Study |                                       | Known in Uniprot to be phosphorylated | Known in HPRD to be phosphorylated |
| 42 MYPT1     | MYPT1_HUMAN  | MYPT1; B2RAH5                  | O14974; Q2KML4; Q599W0; Q86WU3; Q8N9R6; Q891H0; B2RAH5         | NP_002471; NP_001137            | Protein phosphatase 1 regulatory subunit 12A (Myosin phosphatase-targeting subunit 1) (Myosin phosphatase myosin-binding subunit)                                                                                                                                                                                                                                       | GO:0006096; GO:0005514; GO:0005515; GO:0004719; GO:0008152; GO:0005739; GO:0016624                                                                                                                                                                                                                                                                                                                                                                         | glycolysis; mitochondrial matrix; oxidation reduction; protein binding; pyruvate dehydrogenase (acetyl-transfering) activity; metabolic process; mitochondrial; oxidoreductase activity, acting on the aldehyde or oxo group of donors, disulfide as acceptor                                                                                                                                                                                                                                                                                                                                                                                                                                                                                                                                                                                                                                                                                                                                   | Mitochondrionmatrix;                            | Phosphorylated - from this Study |                                       | Known in Uniprot to be phosphorylated | Known in HPRD to be phosphorylated |
| 43 ODPA      | ODPA_HUMAN   | ODPA; Q53P78                   | P06559; Q53P78; Q53H41; Q9NP12; Q91J38; Q91JBD; Q9UNJ4; Q5UNG5 | NP_000275                       | Pyruvate dehydrogenase E1 component subunit alpha, somatic form, mitochondrial (EC 1.2.4.1) (PDHE1-A type 1); Pyruvate dehydrogenase (Lipoamide) alpha 1 (Pyruvate dehydrogenase (Lipoamide) alpha 1, isoform GDA_a)                                                                                                                                                    | GO:0006096; GO:0005514; GO:0005515; GO:0004719; GO:0008152; GO:0005739; GO:0016624                                                                                                                                                                                                                                                                                                                                                                         | glycolysis; mitochondrial matrix; oxidation reduction; protein binding; pyruvate dehydrogenase (acetyl-transfering) activity; metabolic process; mitochondrial; oxidoreductase activity, acting on the aldehyde or oxo group of donors, disulfide as acceptor                                                                                                                                                                                                                                                                                                                                                                                                                                                                                                                                                                                                                                                                                                                                   | Mitochondrionmatrix;                            | Phosphorylated - from this Study |                                       | Known in Uniprot to be phosphorylated | Known in HPRD to be phosphorylated |
| 44 PGK1      | PGK1_HUMAN   | PGK1; ABK4W6                   | P00558; Q57W41; Q618T5; Q8N187; ABK4W6                         | NP_000282                       | Phosphoglycerate kinase 1 (EC 2.7.2.3.) (Primer recognition protein 2) (PRP 2) (Cell migration-inducing gene 10 protein)                                                                                                                                                                                                                                                | GO:0005524; GO:0005737; GO:0006996; GO:0004618; GO:0016310                                                                                                                                                                                                                                                                                                                                                                                                 | ATP binding; cytoplasm; glycolysis; phosphoglycerate kinase activity; phosphorylation                                                                                                                                                                                                                                                                                                                                                                                                                                                                                                                                                                                                                                                                                                                                                                                                                                                                                                           | Cytoplasm                                       | Phosphorylated - from this Study |                                       | Known in Uniprot to be phosphorylated | Kinase                             |
| 45 KPCA      | KPCA_HUMAN   | KPCA; Q72727; B5BU22           | P17252; Q32M72; Q15137; Q96R44; B5BU22; Q72727                 | NP_002728                       | Protein kinase C alpha type (PKC-alpha) (PKC-A) (EC 2.7.11.13); PRKCA protein (Fragment)                                                                                                                                                                                                                                                                                | GO:0005524; GO:0005929; GO:0019992; GO:0008624; GO:0005024; GO:0005886; GO:0005737; GO:0005515; GO:0004871                                                                                                                                                                                                                                                                                                                                                 | ATP binding; calcium ion binding; cytosol; diacylglycerol binding; induction of apoptosis by extracellular signals; membrane fraction; plasma membrane; protein binding; zinc ion binding; diacylglycerol binding; intracellular signaling cascade                                                                                                                                                                                                                                                                                                                                                                                                                                                                                                                                                                                                                                                                                                                                              | Phosphorylated - from this Study                |                                  | Known in Uniprot to be phosphorylated | Known in HPRD to be phosphorylated    | Kinase                             |
| 46 PSA3      | PSA3_HUMAN   | PSA3; B2RCK6                   | P25788; Q86U83; Q86U83; Q9B570; Q9B570; B2RCK6                 | NP_002779; NP_687033            | Proteasome subunit alpha type-3 (EC 3.4.25.1) (Proteasome component C8) (Macropain subunit C8) (Multicatalytic endopeptidase complex subunit C8)                                                                                                                                                                                                                        | GO:0031145; GO:0005856; GO:0005929; GO:0051436; GO:0005634; GO:0051437; GO:0005839; GO:0005515; GO:0004298                                                                                                                                                                                                                                                                                                                                                 | anaphase-promoting complex-dependent proteasomal ubiquitin-dependent protein catabolic process; cytoskeleton; cytosol; negative regulation of ubiquitin-protein ligase activity during mitotic cell cycle; nucleus; positive regulation of ubiquitin-protein ligase activity during mitotic cell cycle; proteasome core complex; protein binding; threonine-type endopeptidase activity                                                                                                                                                                                                                                                                                                                                                                                                                                                                                                                                                                                                         | Cytoplasm;Nucleus                               | Phosphorylated - from this Study |                                       | Known in Uniprot to be phosphorylated | Known in HPRD to be phosphorylated |
| 47 PTFR      | PTFR_HUMAN   | PTFR                           | P18433; Q14513; Q72212; Q96T09                                 | NP_002827; NP_543030            | Receptor-type tyrosine-protein phosphatase alpha (EC 2.7.1.13); (Protein-tyrosine phosphatase alpha) (R-PTP- alpha) (EC 3.1.3.48)                                                                                                                                                                                                                                       | GO:0005887; GO:0006470; GO:0006468; GO:0005001                                                                                                                                                                                                                                                                                                                                                                                                             | integral to plasma membrane; protein amino acid dephosphorylation; protein amino acid phosphorylation; transmembrane receptor protein tyrosine phosphatase activity                                                                                                                                                                                                                                                                                                                                                                                                                                                                                                                                                                                                                                                                                                                                                                                                                             | MembraneSinglepass;ptmembraneprotein            | Phosphorylated - from this Study |                                       | Known in Uniprot to be phosphorylated | Known in HPRD to be phosphorylated |
| 48 SPTB2     | SPTB2_HUMAN  | SPTB2; Q59ER3; Q53R99; B2ZZ289 | Q01082; Q60837; Q16057; Q53R99; Q59ER3; Q81X99; B2ZZ289        | NP_003119; NP_842565            | Spectrin beta chain, brain 1 (Spectrin, non-erythroid beta chain 1) (Beta-II spectrin) (Fodrin beta chain)                                                                                                                                                                                                                                                              | GO:0003779; GO:0005106; GO:0005516; GO:0005730; GO:0008091; GO:0005200                                                                                                                                                                                                                                                                                                                                                                                     | actin binding; barbed-end actin filament capping; calcium ion binding; nucleus; plasma membrane; spectrin; structural constituent of cytoskeleton                                                                                                                                                                                                                                                                                                                                                                                                                                                                                                                                                                                                                                                                                                                                                                                                                                               | Cytoplasm;cytoskeleton                          | Phosphorylated - from this Study |                                       | Known in Uniprot to be phosphorylated | Known in HPRD to be phosphorylated |







| Protein Name | Uniprot Name | Other Names          | Uniprot ID                                                                                             | Refseq IDs                          | Protein Description                                                                                                                                                                                                                                                            | GO ID                                                                                                                                                                                        | GO terms                                                                                                                                                                                                                                                                                                                                                                                                                                                                                                                          | Subcellular location                                                                                             | Comments                              | Comments - Database Search            | Comments - Database Search         | Function |
|--------------|--------------|----------------------|--------------------------------------------------------------------------------------------------------|-------------------------------------|--------------------------------------------------------------------------------------------------------------------------------------------------------------------------------------------------------------------------------------------------------------------------------|----------------------------------------------------------------------------------------------------------------------------------------------------------------------------------------------|-----------------------------------------------------------------------------------------------------------------------------------------------------------------------------------------------------------------------------------------------------------------------------------------------------------------------------------------------------------------------------------------------------------------------------------------------------------------------------------------------------------------------------------|------------------------------------------------------------------------------------------------------------------|---------------------------------------|---------------------------------------|------------------------------------|----------|
| 123 HSP90B   | HSP90B_HUMAN | HSP90B, B2R5P0       | P18238; B2R5P0; Q571W7; Q9N2W0; Q9N2K6                                                                 | NP_031381; XP_293672; XP_292964     | Heat shock protein HSP 90-beta (HSP 90) (HSP 90)                                                                                                                                                                                                                               | GO:000524; GO:0030911; GO:0042470; GO:0032433; GO:0030233; GO:0045429; GO:0006457; GO:0060334; GO:0060338; GO:0069886; GO:0051082                                                            | ATP binding; TPR domain binding; melanosome; negative regulation of professional ubiquitin-dependent protein catabolic process; nitric oxide synthase regulator activity; positive regulation of nitric oxide biosynthetic process; protein folding; regulation of interferon-gamma-mediated signaling pathway; regulation of type 1 Interferon-mediated signaling pathway; response to unfolded protein; unfolded protein binding                                                                                                | Cytoplasm; Melanosome                                                                                            | Phosphorylated - from this Study      | Known in Uniprot to be phosphorylated | Known in HPRD to be phosphorylated |          |
| 124 NSF1C    | NSF1C_HUMAN  | NSF1C, B2R7D4        | Q9UNJ2; Q53XAS; Q72533; Q9N102; Q9NVL9; Q9U106; B2R874                                                 | NP_057227; NP_061327; NP_872289     | NSF1 cofactor p47 (p47 cofactor p47) (UBX mRNA) (Cortactin, isoform CRA_c)                                                                                                                                                                                                     | GO:0005794; GO:0008289; GO:0005634; GO:0005515                                                                                                                                               |                                                                                                                                                                                                                                                                                                                                                                                                                                                                                                                                   | Nucleus; Golgi apparatus; Golgi stack                                                                            | Phosphorylated - from this Study      | Known in Uniprot to be phosphorylated | Known in HPRD to be phosphorylated |          |
| 125 Q96H99   | Q96H99_HUMAN | Q96H99               | B2R874                                                                                                 | NP_612632                           | Cortactin (cDNA FLJ77423, highly similar to Homo sapiens cortactin (CTTN), transcript variant 2, mRNA) (Cortactin, isoform CRA_c)                                                                                                                                              |                                                                                                                                                                                              |                                                                                                                                                                                                                                                                                                                                                                                                                                                                                                                                   |                                                                                                                  | Phosphorylated - from this Study      |                                       |                                    |          |
| 126 STIM1    | STIM1_HUMAN  | STIM1; Q8N382        | Q8N382; Q15866                                                                                         | NP_003147                           | Stromal interaction molecule 1                                                                                                                                                                                                                                                 | GO:0032237; GO:0005509; GO:0005874; GO:0030176; GO:0005887; GO:0005515                                                                                                                       | activation of store-operated calcium channel activity; calcium ion binding; detection of calcium ions; integral to endoplasmic reticulum membrane; integral to plasma membrane; protein binding                                                                                                                                                                                                                                                                                                                                   | Cell membrane; Single pass transmembrane protein                                                                 | Phosphorylated - from this Study      | Known in Uniprot to be phosphorylated |                                    |          |
| 127 AMPD2    | AMPD2_HUMAN  | AMPD2                | Q01433; Q14856; Q14857; Q16686; Q16687; Q16688; Q16729; Q961A1; Q9UDX8; Q9UDX9; Q9UNU4                 | NP_004028; NP_031895; NP_981949     | AMP deaminase 2 (EC 3.5.4.6) (AMP deaminase isoform L)                                                                                                                                                                                                                         | GO:0003876; GO:0006144; GO:0009168                                                                                                                                                           | Golgi apparatus; AMP deaminase activity; purine base metabolic process; purine ribonucleoside monophosphate biosynthetic process                                                                                                                                                                                                                                                                                                                                                                                                  |                                                                                                                  | Phosphorylated - from this Study      | Known in Uniprot to be phosphorylated |                                    |          |
| 128 TB84     | TB84_HUMAN   | TB84; B3KQPM         | P04350; Q969E5; B3KQPM                                                                                 | NP_006078                           | Tubulin beta-4 chain (Tubulin 5 beta)                                                                                                                                                                                                                                          | GO:0005525; GO:0003924; GO:0005874; GO:0007018; GO:0043234; GO:0051258; GO:0005198                                                                                                           | GTP binding; GTPase activity; microtubule; microtubule-based movement; protein complex; protein polymerization; structural molecule activity                                                                                                                                                                                                                                                                                                                                                                                      |                                                                                                                  | Phosphorylated - from this Study      | Known in Uniprot to be phosphorylated |                                    |          |
| 129 GSK3B    | GSK3B_HUMAN  | GSK3B                | P49841; Q05477; Q9UL47                                                                                 | NP_002084; NP_001139 (EC 2.7.11.26) | Glycogen synthase kinase-3 beta (GSK-3 beta)                                                                                                                                                                                                                                   | GO:0005524; GO:0034747; GO:0006983; GO:0051059; GO:0006070; GO:0008013; GO:0030877; GO:0005829; GO:0005977; GO:004696; GO:000634; GO:0002039; GO:0018105; GO:0046827; GO:0034236; GO:0005321 | AMP deaminase activity; Axin-APC-beta-catenin-CTN-B3 complex; ER overload response; NF-kappaB binding; Wnt receptor signaling pathway through beta-catenin; beta-catenin binding; beta-catenin destruction complex; cytosol; glycogen metabolic process; glycogen synthase kinase 3 activity; nucleus; p53 binding; peptidyl-serine phosphorylation; positive regulation of protein complex assembly; positive regulation of protein export from nucleus; protein kinase A catalytic subunit binding; tau-protein kinase activity | Phosphorylated - from this Study                                                                                 | Known in Uniprot to be phosphorylated | Known in HPRD to be phosphorylated    | Kinase                             |          |
| 130 PARD3    | PARD3_HUMAN  | PARD3; Q5VVV1        | Q8TEW0; Q5VVV1; Q8TEW1; Q8TEW2; Q8TEW3; Q962K8; Q96RM6; Q96RM7; Q96V57; Q9B5Y8; Q9KCA8; Q9NWL4; Q9NYE6 | NP_062565                           | Partitioning defective 3 homolog (PARD-3) (PAR-3) (Atypical PKC isotype-specific-interacting protein) (ASIP) (CTCL tumor antigen sc2-5) (PAR3-alpha), Par-3 partitioning defective 3 homolog (C. elegans) (Par-3 partitioning defective 3 homolog (C. elegans), isoform CRA_c) | GO:0007205; GO:0008356; GO:0007409; GO:0007049; GO:0005737; GO:000634; GO:0002039; GO:0018105; GO:0046827; GO:0034236                                                                        | activation of protein kinase C activity by G protein-coupled receptor protein signaling pathway; asymmetric cell division; axonogenesis; cell cycle; cytoplasm; endomembrane system; establishment or cortex; maintenance of cell polarity; protein binding; protein complex assembly; tight junction; protein binding                                                                                                                                                                                                            | Intracytoplasmic membrane; Cell junction; Cell-cell junction; Cell-cell membrane; Cytoplasmic cell-cell junction | Phosphorylated - from this Study      | Known in Uniprot to be phosphorylated | Known in HPRD to be phosphorylated |          |
| 131 NEXN     | NEXN_HUMAN   | Q96DL0; Q14CC3; NEXN | Q96DL0; Q05577; ADFP84; Q00202; Q14CC2; Q14CC3; Q16881; Q722X0; Q9Y2V1                                 | NP_653174                           | Nexlin (F-actin binding protein) (Nexlin)                                                                                                                                                                                                                                      | GO:0051015; GO:0005924; GO:0005737; GO:0005856; GO:0030334; GO:0051493                                                                                                                       | actin filament binding; cell-substrate junction; cytoskeleton; cytoskeletal organization; regulation of cell migration; regulation of cytoskeleton organization                                                                                                                                                                                                                                                                                                                                                                   | Cytoplasm; Cytoskeleton                                                                                          | Phosphorylated - from this Study      | Known in Uniprot to be phosphorylated |                                    |          |
| 132 APOL1    | APOL1_HUMAN  | APOL1; Q2KHQ6        | Q2KHQ6; Q2KHQ7; A5PLQ4; Q68804; Q5R3P7; Q5R3P8; Q96AB8; Q96PK4; Q9BQ03; Q2KHQ6                         | NP_003652; NP_001130                | Apolipoprotein L1 (Apolipoprotein L1) (ApoL-1) (ApoL)                                                                                                                                                                                                                          | GO:0005254; GO:0006821; GO:0008203; GO:0019835; GO:0034364; GO:0045087; GO:0011224; GO:0031640; GO:0008289; GO:0006869; GO:0042157; GO:0005515                                               | chloride channel activity; chloride transport; cholesterol metabolic process; cytotoxicity; high-density lipoprotein particle; innate immune response; intrinsic to membrane; killing of cells of another organism; lipid binding; lipid transport; lipoprotein metabolic process; protein binding                                                                                                                                                                                                                                | Secreted                                                                                                         | Phosphorylated - from this Study      |                                       |                                    |          |
| 133 MTPN     | MTPN_HUMAN   | MTPN; Q6Y9G1         | P58546; Q6Y9G1                                                                                         | NP_665807; NP_001122                | Myotrophin (Protein V-1); Myotrophin, isoform CRA_a (V-1 protein) (cDNA FLJ13663, clone NT281204504, highly similar to MYOTROPHIN) (Myotrophin) (Relative uncharacterized protein DKF7916I122)                                                                                 | GO:0016049; GO:0005515; GO:0016202; GO:0006417; GO:0005854; GO:0021707; GO:0043403; GO:0050596; GO:0007554; GO:0005089; GO:0006915; GO:0005137; GO:0035023                                   | cell growth; cytoplasm; protein binding; regulation of striated muscle development; regulation of translation; axon; catecholamine metabolic process; cerebellar granule cell differentiation; skeletal muscle regeneration; striated muscle cell differentiation                                                                                                                                                                                                                                                                 | Cytoplasm;                                                                                                       | Phosphorylated - from this Study      |                                       |                                    |          |
| 134 ARHG6    | ARHG6_HUMAN  | ARHG6; Q8N4Q3        | Q15052; A8N9W9; AK65E7; Q15396; Q32C66; Q73W31; Q86XH0; Q8N4Q3                                         | NP_004831                           | Rho guanine nucleotide exchange factor 6 (Rac/Cdc42 guanine nucleotide exchange factor 6) (PAK-interacting exchange factor alpha) (Alpha-Rfx) (COOL-2); Similar to Rac/Cdc42 guanine nucleotide exchange factor (GEF) 6 (Fragment)                                             | GO:0005596; GO:0005737; GO:0005089; GO:0006915; GO:0005137; GO:0035023                                                                                                                       | GTPase activator activity; JNK cascade; regulation of protein binding; protein binding; regulation of Rho protein signal transduction;                                                                                                                                                                                                                                                                                                                                                                                            |                                                                                                                  | Phosphorylated - from this Study      | Known in Uniprot to be phosphorylated | Known in HPRD to be phosphorylated |          |
| 135 TAC2N    | TAC2N_HUMAN  | TAC2N                | Q8N9U0                                                                                                 | NP_689545                           | Tandem C2 domains nuclear protein (Membrane targeting tandem C2 domain-containing protein 1) 057 (Tandem C2 protein in nucleus) (Tbc-1)                                                                                                                                        | GO:0005634                                                                                                                                                                                   | nucleus                                                                                                                                                                                                                                                                                                                                                                                                                                                                                                                           | Nucleus                                                                                                          | Phosphorylated - from this Study      | Known in Uniprot to be phosphorylated |                                    |          |
| 136 TEBP     | TEBP_HUMAN   | TEBP; ABK7D0         | Q15185; ABK7D0; Q8WU70                                                                                 | NP_006592; XP_208234                | Prostaglandin E synthase 3 (EC 5.3.99.3) (Cytosolic prostaglandin E2 synthase) (cPGEs) (Telomerase-binding protein p23) (His90 co-chaperone) (Progesterone receptor complex p23)                                                                                               | GO:0000781; GO:0005737; GO:0005156; GO:0052020; GO:0007165; GO:0003720; GO:0005697; GO:0000723; GO:0005999; GO:0005792; GO:0070296; GO:0033017                                               | chromosome, telomeric region; cytoplasm; prostaglandin biosynthetic process; prostaglandin-E synthase activity; signal transduction; telomerase activity; telomerase holoenzyme complex; telomere maintenance; unfolded protein binding                                                                                                                                                                                                                                                                                           | Cytoplasm                                                                                                        | Phosphorylated - from this Study      | Known in Uniprot to be phosphorylated | Known in HPRD to be phosphorylated |          |
| 137 PA2A4    | PA2A4_HUMAN  | PA2A4                | P47712; B1AKA4; Q29880                                                                                 | NP_077734                           | Cytosolic phospholipase A2 (cPLA2) (Phospholipase A2 group IVA) (Includes: Phospholipase A2 (EC 3.1.1.4) (Phosphatidylcholine 2-acylhydrolase); Lysophospholipase (EC 3.1.1.5))                                                                                                | GO:0005596; GO:0005737; GO:0006915; GO:0016021; GO:004622; GO:0004623; GO:0009395; GO:0006663                                                                                                | GTPase activator activity; JNK cascade; regulation of protein binding; protein binding; regulation of Rho protein signal transduction;                                                                                                                                                                                                                                                                                                                                                                                            | Cytoplasm; Cytoplasmic vesicle                                                                                   | Phosphorylated - from this Study      | Known in Uniprot to be phosphorylated | Known in HPRD to be phosphorylated |          |
| 138 LRC47    | LRC47_HUMAN  | LRC47                | Q8N1G4; Q9L4N5                                                                                         | NP_065761                           | Leucine-rich repeat-containing protein 47                                                                                                                                                                                                                                      | GO:0003723; GO:0004626; GO:0005515; GO:0006412                                                                                                                                               | RNA binding; phenylalanine-tRNA ligase activity; protein binding; translation                                                                                                                                                                                                                                                                                                                                                                                                                                                     |                                                                                                                  | Phosphorylated - from this Study      | Known in Uniprot to be phosphorylated |                                    |          |
| 139 AT2A2    | AT2A2_HUMAN  | AT2A2                | P16615; P16614                                                                                         | NP_733765; NP_0010921               | Sarcoplasmic/endoplasmic reticulum calcium pump 2 (SERCA2) (EC 3.6.3.8) (Calcium pump NP_0011292_2) (Calcium-transporting ATPase sarcoplasmic reticulum type, slow twitch skeletal muscle isoform) (SR Ca(2+)-ATPase 2) (Endoplasmic reticulum class 1/2 Ca(2+)-ATPase)        | GO:0005524; GO:0006915; GO:0048155; GO:0005059; GO:0007155; GO:0008844; GO:0005887; GO:0006287; GO:0005792; GO:0070296; GO:0033017                                                           | ATP binding; ATP biosynthetic process; S100 alpha binding; calcium ion binding; calcium-transporting ATPase activity; cell adhesion; epidermis development; integral to plasma membrane; magnesium ion binding; microsome; sarcoplasmic reticulum calcium ion transport; sarcoplasmic reticulum membrane                                                                                                                                                                                                                          | Endoplasmic reticulum membrane; Multispanning membrane; Sarcoplasmic reticulum membrane                          | Phosphorylated - from this Study      | Known in Uniprot to be phosphorylated | Known in HPRD to be phosphorylated |          |
| 140 GRP2     | GRP2_HUMAN   | Q7LDG7; Q9L6U5; GRP2 | Q7LDG7; Q9L6U5; Q00538                                                                                 | NP_722541; NP_005816; NP_0010921    | RAS guanyl-releasing protein 2 (Calcium and DAG-regulated guanine nucleotide exchange factor 1) (CaDc2-GEF) (F25B3.3 kinase-like protein) 40; (Cdc25-like protein) (HDC25L)                                                                                                    | GO:0007255; GO:0005999; GO:0030054; GO:0042995; GO:0005059; GO:0019992; GO:0005086; GO:0001586; GO:0051056; GO:0045202; GO:0019717; GO:0008270                                               | Ras protein signal transduction; calcium ion binding; cell junction; cell projection; cytosol; diacylglycerol binding; guanylnucleotide exchange factor activity; regulation of cell growth; regulation of small GTPase mediated signal transduction; synapse; synaptosome; zinc ion binding                                                                                                                                                                                                                                      | Cytoplasm; Cytosol; Cell-cell junction                                                                           | Phosphorylated - from this Study      | Known in Uniprot to be phosphorylated |                                    |          |
| 141 ABCA5    | ABCA5_HUMAN  | ABCA5                | Q8WVZ7; Q8L1E5; Q96L11; Q96M54; Q96P29; Q9NY14                                                         | NP_061142; NP_758424                | ATP-binding cassette sub-family A member 5                                                                                                                                                                                                                                     | GO:0005524; GO:0006887; GO:0000139; GO:0016021; GO:0031902; GO:0005765; GO:0006610                                                                                                           | ATP binding; ATPase activity; Golgi membrane; integral to membrane; late endosome membrane; lysosomal membrane; transport                                                                                                                                                                                                                                                                                                                                                                                                         | Lysosomal membrane; Membrane; Late endosome membrane; Multispanning membrane; Multispanning membrane             | Phosphorylated - from this Study      | Known in Uniprot to be phosphorylated |                                    |          |

| Protein Name | Uniprot Name | Other Names                   | Uniprot ID                                                                                                                                                                                                                                                                                                                                                                                                                                                                                                                                                                      | Refseq IDs                                            | Protein Description                                                                                                                                                                                                                                                                                    | GO ID                                                                                                                                                                                                                                                                                                                                                     | GO terms                                                                                                                                                                                                                                                                                                                                                                                                                                                         | Subcellular location                                  | Comments                         | Comments         | Comments - Database Search | Comments - Database Search | Function |
|--------------|--------------|-------------------------------|---------------------------------------------------------------------------------------------------------------------------------------------------------------------------------------------------------------------------------------------------------------------------------------------------------------------------------------------------------------------------------------------------------------------------------------------------------------------------------------------------------------------------------------------------------------------------------|-------------------------------------------------------|--------------------------------------------------------------------------------------------------------------------------------------------------------------------------------------------------------------------------------------------------------------------------------------------------------|-----------------------------------------------------------------------------------------------------------------------------------------------------------------------------------------------------------------------------------------------------------------------------------------------------------------------------------------------------------|------------------------------------------------------------------------------------------------------------------------------------------------------------------------------------------------------------------------------------------------------------------------------------------------------------------------------------------------------------------------------------------------------------------------------------------------------------------|-------------------------------------------------------|----------------------------------|------------------|----------------------------|----------------------------|----------|
| 142 SPAG1    | SPAG1_HUMAN  | SPAG1; A6NP70                 | Q77617; Q7Z5C1; A6NP70                                                                                                                                                                                                                                                                                                                                                                                                                                                                                                                                                          | NP_757367; NP_003105                                  | Sperm-associated antigen 1 (fertility-related sperm protein Spag-1) (HSD-3.8)                                                                                                                                                                                                                          | GO:000525; GO:0005737; GO:0016787; GO:0016021; GO:0031502; GO:0055037; GO:0060885; GO:0031402; GO:006814; GO:0016021; GO:0006885; GO:0031402; GO:0015385                                                                                                                                                                                                  | GTP binding; cytoplasm; hydrolase activity; single fertilization                                                                                                                                                                                                                                                                                                                                                                                                 | Cytoplasm                                             | Phosphorylated - from this Study | Known in Uniprot | Known in HPRD              | to be phosphorylated       |          |
| 143 SL9A9    | SL9A9_HUMAN  | SL9A9; Q5WA58                 | Q5WA58; A6NR29; C13IC1; Q53P6; Q8NAB9                                                                                                                                                                                                                                                                                                                                                                                                                                                                                                                                           | NP_775924                                             | Sodium/hydrogen exchanger 9 (Na <sup>+</sup> /H <sup>+</sup> exchanger 9) (NHE-9) (Solute carrier family 9 member 1) (Na <sup>+</sup> /H <sup>+</sup> ) antiporter; amiloride-sensitive) (APNH)                                                                                                        | GO:000525; GO:0016787; GO:0016021; GO:0031502; GO:0055037; GO:0060885; GO:0031402; GO:006814; GO:0016021; GO:0006885; GO:0031402; GO:0015385                                                                                                                                                                                                              | integral to membrane; late endosome membrane; recycling endosome; regulation of pH; sodium ion binding; sodium ion transport; sodium/hydrogen antiporter activity                                                                                                                                                                                                                                                                                                | LateendosomeMembraneMultipassmembrane                 | Phosphorylated - from this Study | Known in Uniprot | Known in HPRD              | to be phosphorylated       |          |
| 144 SL9A1    | SL9A1_HUMAN  | SL9A1; Q5VU07; B1ALD6; B2R4H2 | Q5VU07; Q9N212; B1ALD6; B2R4H2                                                                                                                                                                                                                                                                                                                                                                                                                                                                                                                                                  | NP_003038                                             | Sodium/hydrogen exchanger 1 (Na <sup>+</sup> /H <sup>+</sup> exchanger 1) (NHE-1) (Solute carrier family 9 member 1) (Na <sup>+</sup> /H <sup>+</sup> ) antiporter; amiloride-sensitive) (APNH)                                                                                                        | GO:000525; GO:0016787; GO:0016021; GO:0031502; GO:0055037; GO:0060885; GO:0031402; GO:006814; GO:0016021; GO:0006885; GO:0031402; GO:0015385                                                                                                                                                                                                              | integral to membrane; regulation of pH; sodium ion binding; sodium ion transport; sodium/hydrogen antiporter activity                                                                                                                                                                                                                                                                                                                                            | MembraneMultipassmembrane                             | Phosphorylated - from this Study | Known in Uniprot | Known in HPRD              | to be phosphorylated       |          |
| 145 MY18A    | MY18A_HUMAN  | MY18A                         | Q5W931; Q5W932; Q5W933; Q5W934; Q5W935; Q5W936; Q5W937; Q5W938; Q5W939; Q5W940; Q5W941; Q5W942; Q5W943; Q5W944; Q5W945; Q5W946; Q5W947; Q5W948; Q5W949; Q5W950; Q5W951; Q5W952; Q5W953; Q5W954; Q5W955; Q5W956; Q5W957; Q5W958; Q5W959; Q5W960; Q5W961; Q5W962; Q5W963; Q5W964; Q5W965; Q5W966; Q5W967; Q5W968; Q5W969; Q5W970; Q5W971; Q5W972; Q5W973; Q5W974; Q5W975; Q5W976; Q5W977; Q5W978; Q5W979; Q5W980; Q5W981; Q5W982; Q5W983; Q5W984; Q5W985; Q5W986; Q5W987; Q5W988; Q5W989; Q5W990; Q5W991; Q5W992; Q5W993; Q5W994; Q5W995; Q5W996; Q5W997; Q5W998; Q5W999; Q5W1000 | NP_510880; NP_976063                                  | Myosin-VIIIa (Myosin containing a PDZ domain) (Molecule associated with 3AK3 N-terminus) (MAIN)                                                                                                                                                                                                        | GO:000525; GO:0005793; GO:0006916; GO:0042802; GO:0016459                                                                                                                                                                                                                                                                                                 | ATP binding; ER-Golgi intermediate compartment; anti-apoptosis; identical protein binding; motor activity; myosin complex                                                                                                                                                                                                                                                                                                                                        | EndoplasmicreticulumGolgiintermediatecomp             | Phosphorylated - from this Study | Known in Uniprot | Known in HPRD              | to be phosphorylated       |          |
| 146 SAM14    | SAM14_HUMAN  | SAM14                         | Q81ZD0; Q81ZD1                                                                                                                                                                                                                                                                                                                                                                                                                                                                                                                                                                  | NP_777580                                             | Sterile alpha motif domain-containing protein 14                                                                                                                                                                                                                                                       | GO:000525; GO:0005793; GO:0006916; GO:0042802; GO:0016459                                                                                                                                                                                                                                                                                                 | ATP binding; ER-Golgi intermediate compartment; anti-apoptosis; identical protein binding; motor activity; myosin complex                                                                                                                                                                                                                                                                                                                                        | EndoplasmicreticulumGolgiintermediatecomp             | Phosphorylated - from this Study | Known in Uniprot | Known in HPRD              | to be phosphorylated       |          |
| 147 Q5V32    | Q5V32_HUMAN  | Q5V32; B1AL10                 | Q5V32; B1AL10                                                                                                                                                                                                                                                                                                                                                                                                                                                                                                                                                                   | NP_803171                                             |                                                                                                                                                                                                                                                                                                        | GO:000525; GO:0005793; GO:0006916; GO:0042802; GO:0016459                                                                                                                                                                                                                                                                                                 | ATP binding; ER-Golgi intermediate compartment; anti-apoptosis; identical protein binding; motor activity; myosin complex                                                                                                                                                                                                                                                                                                                                        | EndoplasmicreticulumGolgiintermediatecomp             | Phosphorylated - from this Study | Known in Uniprot | Known in HPRD              | to be phosphorylated       |          |
| 148 RICS     | RICS_HUMAN   | Q86Y6; RICS                   | Q86Y6; A7KAX0; Q94820; Q81UG4; Q86W3                                                                                                                                                                                                                                                                                                                                                                                                                                                                                                                                            | NP_055530; NP_001136                                  | Rho/Cdc42/Rac GTPase-activating protein RICS (p200RhoGAP) (p250GAP) (RhoGAP involved in the beta-catenin-N-cadherin and NMDA receptor signaling) (Brain-specific Rho GTPase-activating protein) (CAB-associated Cdc42/Rac GTPase-activating protein) (GC-GAP) (GTPase regulator interacting with TrkA) | GO:0005096; GO:000139; GO:0003054; GO:0002495; GO:0005793; GO:0010008; GO:0016021; GO:0045211; GO:0005515; GO:0005252; GO:0005509; GO:0006816; GO:0016021; GO:0005252; GO:0003924; GO:0042208; GO:0006928; GO:0005793; GO:0007018; GO:0042267; GO:0051258; GO:0007137; GO:0016600; GO:0043234; GO:0051225; GO:0005200; GO:0019478; GO:0005737; GO:0016788 | GTPase activator activity; Golgi membrane; cell junction; cell projection; endoplasmic reticulum membrane; endosome membrane; phosphoinositide binding; postsynaptic membrane; protein binding; signal transduction                                                                                                                                                                                                                                              | Celljunctionsynapsepostsynapticmembrane               | Phosphorylated - from this Study | Known in Uniprot | Known in HPRD              | to be phosphorylated       |          |
| 149 TPC1     | TPC1_HUMAN   | TPC1                          | Q86K59; Q9ULQ1; A7E258; Q8NC20                                                                                                                                                                                                                                                                                                                                                                                                                                                                                                                                                  | NP_060371; NP_001137                                  | Two pore calcium channel protein 1 (Voltage-dependent calcium channel protein TPC1)                                                                                                                                                                                                                    | GO:000525; GO:0005515; GO:0005252; GO:0005509; GO:0006816; GO:0016021; GO:0005252; GO:0003924; GO:0042208; GO:0006928; GO:0005793; GO:0007018; GO:0042267; GO:0051258; GO:0007137; GO:0016600; GO:0043234; GO:0051225; GO:0005200; GO:0019478; GO:0005737; GO:0016788                                                                                     | calcium channel activity; calcium ion binding; calcium ion transport; integral to membrane; voltage-gated ion channel activity                                                                                                                                                                                                                                                                                                                                   | MembraneMultipassmembrane                             | Phosphorylated - from this Study | Known in Uniprot | Known in HPRD              | to be phosphorylated       |          |
| 150 TBS5     | TBS5_HUMAN   | TBS5; Q5SU16                  | P07437; Q5SU16; P035073; NP_212565; Q9CY33                                                                                                                                                                                                                                                                                                                                                                                                                                                                                                                                      | NP_821133; XP_114617; XP_935073; XP_212565; XP_067939 | Tubulin beta chain (Tubulin beta-5 chain); Tubulin (beta polypeptide (Tubulin, beta) (beta 5-tubulin) (Beta-tubulin protein) (Tubulin, beta, isoform CRA_a)                                                                                                                                            | GO:000525; GO:0003924; GO:0042208; GO:0006928; GO:0005793; GO:0007018; GO:0042267; GO:0051258; GO:0007137; GO:0016600; GO:0043234; GO:0051225; GO:0005200; GO:0019478; GO:0005737; GO:0016788                                                                                                                                                             | GTP binding; GTPase activity; MHC class I protein binding; cell motion; microtubule; microtubule-based movement; natural killer cell mediated cytotoxicity; protein polymerization; cytoplasm; flotillin complex; protein complex; spindle assembly; structural constituent of cytoskeleton; structural molecule activity                                                                                                                                        | MembraneMultipassmembrane                             | Phosphorylated - from this Study | Known in Uniprot | Known in HPRD              | to be phosphorylated       |          |
| 151 DTD1     | DTD1_HUMAN   | DTD1; ABKSX5                  | Q8TEA8; Q496D1; Q5W184; Q8W18B; Q8W67; Q9H464; Q9H474; ABKSX5                                                                                                                                                                                                                                                                                                                                                                                                                                                                                                                   | NP_543010                                             | D-tyrosyl-tRNA(Tyr) deacylase 1 (EC 3.1.1.-) (Histidyl-tRNA synthetase-related)                                                                                                                                                                                                                        | GO:000525; GO:0005737; GO:0016788                                                                                                                                                                                                                                                                                                                         | D-amino acid catabolic process; cytoplasm; hydrolase activity, acting on ester bonds                                                                                                                                                                                                                                                                                                                                                                             | Cytoplasm                                             | Phosphorylated - from this Study | Known in Uniprot | Known in HPRD              | to be phosphorylated       |          |
| 152 PGM2L    | PGM2L_HUMAN  | PGM2L                         | Q6PCE2; Q6QZ7; Q9UIK3                                                                                                                                                                                                                                                                                                                                                                                                                                                                                                                                                           | NP_775853                                             | Glucose 1,6-bisphosphate synthase (EC 2.7.1.106) (Phosphoglucomutase-2-like 1) (PGM2L)                                                                                                                                                                                                                 | GO:0006006; GO:0047933; GO:0016668                                                                                                                                                                                                                                                                                                                        | glucose metabolic process; glucose-1,6-bisphosphate synthase activity; intramolecular transferase activity, phosphotransferase                                                                                                                                                                                                                                                                                                                                   |                                                       | Phosphorylated - from this Study | Known in Uniprot | Known in HPRD              | to be phosphorylated       |          |
| 153 TXND1    | TXND1_HUMAN  | TXND1; B2R74A                 | Q9H3N1; Q8N487; Q8N488; Q914T6; B2R74A                                                                                                                                                                                                                                                                                                                                                                                                                                                                                                                                          | NP_110382                                             | Thioredoxin domain-containing protein 1 (Transmembrane Tx-related protein) (Thioredoxin-related transmembrane protein)                                                                                                                                                                                 | GO:0006260; GO:0006885; GO:0006916; GO:0030612; GO:0008283; GO:0045454; GO:0015036; GO:002900; GO:0007018; GO:0045211; GO:0005064; GO:0005634; GO:0045927; GO:0045893; GO:0009500; GO:0007165                                                                                                                                                             | DNA replication; ER to Golgi vesicle-mediated transport; anti-apoptosis; arsenate reductase (thioredoxin) activity; cell proliferation; cell redox homeostasis; disulfide oxidoreductase activity; electron transport chain; endoplasmic reticulum membrane; integral to membrane; leukocyte activation; membrane fraction; nucleus; positive regulation of growth; positive regulation of transcription, DNA-dependent; response to stress; signal transduction | MembraneSinglepassyptemembraneproteinE                | Phosphorylated - from this Study | Known in Uniprot | Known in HPRD              | to be phosphorylated       |          |
| 154 FAG3A    | FAG3A_HUMAN  | Q9P2F7; Q8NSJ2; FAG3A         | Q8NSJ2; Q9P2F7; B3KWP4; B3KWP5; B4DXF2; B4E154; Q5Z3F0; Q9NUL9                                                                                                                                                                                                                                                                                                                                                                                                                                                                                                                  | NP_060849                                             | Protein FAG3A                                                                                                                                                                                                                                                                                          | GO:0005515                                                                                                                                                                                                                                                                                                                                                | protein binding                                                                                                                                                                                                                                                                                                                                                                                                                                                  |                                                       | Phosphorylated - from this Study | Known in Uniprot | Known in HPRD              | to be phosphorylated       |          |
| 155 TMM40    | TMM40_HUMAN  | TMM40                         | Q8NAL4; Q8W14; Q9NUL24                                                                                                                                                                                                                                                                                                                                                                                                                                                                                                                                                          | NP_060776                                             | Transmembrane protein 40                                                                                                                                                                                                                                                                               | GO:0016021                                                                                                                                                                                                                                                                                                                                                | integral to membrane                                                                                                                                                                                                                                                                                                                                                                                                                                             | MembraneMultipassmembrane                             | Phosphorylated - from this Study | Known in Uniprot | Known in HPRD              | to be phosphorylated       |          |
| 156 ANLN     | ANLN_HUMAN   | ANLN                          | Q9NQW6; Q5CZ75; Q6NKS5; Q9H8V4; Q9NWN9; Q9NVP0                                                                                                                                                                                                                                                                                                                                                                                                                                                                                                                                  | NP_061155                                             | Actin-binding protein anillin                                                                                                                                                                                                                                                                          | GO:0003779; GO:0005826; GO:0009010; GO:0005634; GO:0007096; GO:0000921                                                                                                                                                                                                                                                                                    | actin binding; contractile ring; cytokinesis; nucleus; regulation of exit from mitosis; septin ring assembly                                                                                                                                                                                                                                                                                                                                                     | NucleusCytoplasmcytoskeletonCytoplasmclicortex        | Phosphorylated - from this Study | Known in Uniprot | Known in HPRD              | to be phosphorylated       |          |
| 157 CFP1     | CFP1_HUMAN   | CFP1; CCNY                    | Q8ND76; Q2NWX; Q2TU96; Q6N186; Q7CAU7; Q8TEK2; Q8TEK3; Q6N99; Q96P45                                                                                                                                                                                                                                                                                                                                                                                                                                                                                                            | NP_659449; NP_850949                                  | Cyclin-Y (Cyclin fold protein 1) (Cyclin box protein 1)                                                                                                                                                                                                                                                | GO:0005634                                                                                                                                                                                                                                                                                                                                                | nucleus                                                                                                                                                                                                                                                                                                                                                                                                                                                          |                                                       | Phosphorylated - from this Study | Known in Uniprot | Known in HPRD              | to be phosphorylated       |          |
| 158 BET1L    | BET1L_HUMAN  | BET1L; A6N160                 | Q9NVM9; B3KMY0; A6N160                                                                                                                                                                                                                                                                                                                                                                                                                                                                                                                                                          | NP_057610; NP_001092                                  | BET1-like protein (Vesicle transport protein GOS15) (Golgi SNARE with a size of 15 kDa) (GOS15) (GS15)                                                                                                                                                                                                 | GO:000139; GO:0005484; GO:0031201; GO:0005708; GO:0016021; GO:0015031; GO:0005534; GO:0006915; GO:0005829; GO:0042802; GO:0044419; GO:0016020; GO:0006469; GO:0005634; GO:0046777; GO:0046794; GO:0040008; GO:0007165                                                                                                                                     | Golgi membrane; SNAP receptor activity; SNARE complex; endosome; integral to membrane; protein transport; retrograde transport, endosome to Golgi                                                                                                                                                                                                                                                                                                                | GolgiapparatusmembraneneSinglepassyptemembraneprotein | Phosphorylated - from this Study | Known in Uniprot | Known in HPRD              | to be phosphorylated       |          |
| 159 PAK2     | PAK2_HUMAN   | PAK2; ABKSM4                  | Q13177; ABKSM4; Q13154; Q6ISCS                                                                                                                                                                                                                                                                                                                                                                                                                                                                                                                                                  | NP_002568; NP_0011261                                 | Serine/threonine-protein kinase PAK 2 (EC 2.7.11.1) (p21-activated kinase 2) (Gamma-PAK) (PAK5) (S6/H4 kinase) (p58) (Cloned into: PAK-2p27 (p27); PAK-2p34 (p34) (C-1-PAK2))                                                                                                                          | GO:000525; GO:0005793; GO:0006916; GO:0042802; GO:0044419; GO:0016020; GO:0006469; GO:0005634; GO:0046777; GO:0046794; GO:0040008; GO:0007165                                                                                                                                                                                                             | ATP binding; apoptosis; cytosol; identical protein binding; interspecies interaction between organisms; membrane; negative regulation of protein kinase activity; nucleus; protein amino acid autophosphorylation; protein serine/threonine kinase activity; regulation of growth; signal transduction                                                                                                                                                           | CytoplasmNucleusCytoplasmnucleolaranchor              | Phosphorylated - from this Study | Known in Uniprot | Known in HPRD              | to be phosphorylated       | Kinase   |
| 160 FGD3     | FGD3_HUMAN   | FGD3                          | Q4VXB5; Q5SP0; Q4VXB4; Q7Z7D9; Q8NSG1                                                                                                                                                                                                                                                                                                                                                                                                                                                                                                                                           | NP_149077; NP_001077                                  | FYVE, RhoGEF and PH domain-containing protein 3 (Zinc finger FYVE domain-containing protein 5)                                                                                                                                                                                                         | GO:000525; GO:0005793; GO:0006916; GO:0042802; GO:0044419; GO:0016020; GO:0006469; GO:0005634; GO:0046777; GO:0046794; GO:0040008; GO:0007165                                                                                                                                                                                                             | Golgi apparatus; Rho guanyl-nucleotide exchange factor activity; actin cytoskeleton organization; cytoskeleton; filopodium assembly; lamellipodium; regulation of Cdc42 GTPase activity; regulation of cell shape; ruffle; small GTPase binding; zinc ion binding                                                                                                                                                                                                | CytoplasmCytoplasmcytoskeleton                        | Phosphorylated - from this Study | Known in Uniprot | Known in HPRD              | to be phosphorylated       |          |
| 161 SKA2     | SKA2_HUMAN   | SKA2                          | Q8WVK7; A6NLL3; B3KPL3                                                                                                                                                                                                                                                                                                                                                                                                                                                                                                                                                          | NP_872426                                             | Spindle and kinetochore-associated protein 2 (Protein FAM33A)                                                                                                                                                                                                                                          | GO:000139; GO:0051301; GO:0007077; GO:0005819                                                                                                                                                                                                                                                                                                             | cell division; condensed chromosome kinetochore; mitosis; spindle                                                                                                                                                                                                                                                                                                                                                                                                | SpindleKinetochore                                    | Phosphorylated - from this Study | Known in Uniprot | Known in HPRD              | to be phosphorylated       |          |
| 162 PKHO2    | PKHO2_HUMAN  | Q8TDS5; PKHO2                 | Q8TDS5; Q7L4H4; Q8WY58                                                                                                                                                                                                                                                                                                                                                                                                                                                                                                                                                          | NP_079477                                             | Plectstrin homology domain-containing family O member 2 (Plectstrin homology domain-containing family O member 1)                                                                                                                                                                                      | GO:0007155; GO:0006707; GO:0016021; GO:0030169; GO:0006898; GO:0005044; GO:0016358; GO:0005515; GO:00199141; GO:0043687; GO:0051246; GO:0004842                                                                                                                                                                                                           | cell adhesion; cholesterol catabolic process; integral to membrane; low density lipoprotein binding; receptor-mediated endocytosis; scavenger receptor activity; dendrite development; protein binding                                                                                                                                                                                                                                                           | MembraneSinglepassyptemembraneprotein                 | Phosphorylated - from this Study | Known in Uniprot | Known in HPRD              | to be phosphorylated       |          |
| 163 SREC     | SREC_HUMAN   | SREC; Q8NH2D; ABM9Q5          | Q14162; Q43701; ABM9Q5; Q8NH2D                                                                                                                                                                                                                                                                                                                                                                                                                                                                                                                                                  | NP_663327; NP_003684                                  | Endothelial cells scavenger receptor (Acetyl LDL receptor) (Scavenger receptor class F member 1); SREC5                                                                                                                                                                                                | GO:0007155; GO:0006707; GO:0016021; GO:0030169; GO:0006898; GO:0005044; GO:0016358; GO:0005515; GO:00199141; GO:0043687; GO:0051246; GO:0004842                                                                                                                                                                                                           | cell adhesion; cholesterol catabolic process; integral to membrane; low density lipoprotein binding; receptor-mediated endocytosis; scavenger receptor activity; dendrite development; protein binding                                                                                                                                                                                                                                                           | MembraneSinglepassyptemembraneprotein                 | Phosphorylated - from this Study | Known in Uniprot | Known in HPRD              | to be phosphorylated       |          |
| 164 UBE2O    | UBE2O_HUMAN  | UBE2O                         | Q9C0C9; A6NDU5; Q6V9P4; Q6FZ2; Q86U44; Q8M425; Q8TBN1; Q8BSW1; Q9H6E5; Q9H7E4; Q9H9B2                                                                                                                                                                                                                                                                                                                                                                                                                                                                                           | NP_071349                                             | Ubiquitin-conjugating enzyme E2 O (EC 6.3.2.19) (Ubiquitin-protein ligase O) (Ubiquitin carrier protein O) (Ubiquitin-conjugating enzyme E2 of 230 kDa) (E2-230k)                                                                                                                                      | GO:000525; GO:0005793; GO:0006916; GO:0042802; GO:0043687; GO:0051246; GO:0004842                                                                                                                                                                                                                                                                         | modification-dependent protein catabolic process; post-translational protein modification; regulation of protein metabolic process; ubiquitin-protein ligase activity                                                                                                                                                                                                                                                                                            |                                                       | Phosphorylated - from this Study | Known in Uniprot | Known in HPRD              | to be phosphorylated       |          |



| Protein Name | Uniprot Name | Other Names           | Uniprot ID                                                                                                      | Refseq IDs                           | Protein Description                                                                                                                                                                                                                                                                                                                                     | GO ID                                                                                                                 | GO Terms                                                                                                                                                                                   | Subcellular location                                                         | Comments                         | Comments - Database Search            | Comments - Database Search         | Function |
|--------------|--------------|-----------------------|-----------------------------------------------------------------------------------------------------------------|--------------------------------------|---------------------------------------------------------------------------------------------------------------------------------------------------------------------------------------------------------------------------------------------------------------------------------------------------------------------------------------------------------|-----------------------------------------------------------------------------------------------------------------------|--------------------------------------------------------------------------------------------------------------------------------------------------------------------------------------------|------------------------------------------------------------------------------|----------------------------------|---------------------------------------|------------------------------------|----------|
| 165 RAB7     | RAB7_HUMAN   | RAB7; RAB7A           | P51149; AK3V36; Q9HW10; Q9JPH0                                                                                  | NP_004628                            | Ras-related protein Rab-7a                                                                                                                                                                                                                                                                                                                              | GO:000525; GO:0003924; GO:0005794; GO:0006897; GO:0005770; GO:0005764; GO:0042470; GO:0005515; GO:0015031; GO:0007264 | GTP binding; GTPase activity; Golgi apparatus; endocytosis; late endosome; lysosome; melanosome; protein binding; protein transport; small GTPase mediated signal transduction             | LateendosomeLysosomeCytoplasmicvesiclePhosphorylated - from this Study       |                                  | Known in Uniprot to be phosphorylated |                                    |          |
| 166 GPM1     | GPM1_HUMAN   | GPM1                  | Q86YR5; A9Z1X4; B1BRW1; Q86SR5; Q969T1; Q9JF58                                                                  | NP_056412; NP_001139; NP_0011391; 11 | G-protein-signaling modulator 1 (Activator of G-protein signaling 3)                                                                                                                                                                                                                                                                                    | GO:0005096; GO:0001039; GO:0005486; GO:0030154; GO:0005789; GO:0007399; GO:0005886; GO:0007165                        | GTPase activator activity; Golgi membrane; binding; cell differentiation; endoplasmic reticulum membrane; nervous system development; plasma membrane; signal transduction                 | CytoplasmcytosolEndoplasmicreticulumMembranePhosphorylated - from this Study |                                  | Known in Uniprot to be phosphorylated |                                    |          |
| 167 BCAT1    | BCAT1_HUMAN  | BCAT1                 | P54687; Q96W99                                                                                                  | NP_005495                            | Branched-chain-amino-acid aminotransferase, cytosolic (BCAT(c)) (EC 2.6.1.42) (Protein ECA39)                                                                                                                                                                                                                                                           | GO:0000082; GO:0000992; GO:0004084; GO:0008283; GO:0005737                                                            | G1/S transition of mitotic cell cycle; branched chain family amino acid biosynthetic process; branched-chain-amino-acid transaminase activity; cell proliferation; cytoplasm               | Cytoplasm                                                                    | Phosphorylated - from this Study |                                       |                                    |          |
| 168 OSTF1    | OSTF1_HUMAN  | OSTF1                 | Q92882; Q92883; Q6Z557; Q8T141; Q9XN03                                                                          | NP_036515                            | Osteoclast-stimulating factor 1                                                                                                                                                                                                                                                                                                                         | GO:0005737; GO:0042802; GO:0015033; GO:0007165                                                                        | cytoplasm; identical protein binding; ossification; signal transduction                                                                                                                    | Cytoplasm                                                                    | Phosphorylated - from this Study | Known in Uniprot to be phosphorylated |                                    |          |
| 169 MFS6     | MFS6_HUMAN   | Q86TH2; Q6Z557; MFS6  | Q6Z557; Q8T141; Q9XN03                                                                                          | NP_060164                            | Major facilitator superfamily domain-containing protein 6 (Macrophage MHC class I receptor 2 homolog)                                                                                                                                                                                                                                                   | GO:0016021                                                                                                            | integral to membrane                                                                                                                                                                       | MembraneMultipassmembraneprotein                                             | Phosphorylated - from this Study | Known in Uniprot to be phosphorylated |                                    |          |
| 170 MYCP     | MYCP_HUMAN   | MYCP                  | Q72401; Q14651; Q81777; Q81VX2; Q8N893                                                                          | NP_005839                            | C-myc promoter-binding protein (DENN domain-containing protein 4A)                                                                                                                                                                                                                                                                                      | GO:0003677; GO:0005737; GO:0005515; GO:0006355                                                                        | DNA binding; nucleus; protein binding; regulation of transcription, DNA-dependent                                                                                                          | Nucleus                                                                      | Phosphorylated - from this Study | Known in Uniprot to be phosphorylated |                                    |          |
| 171 RHG18    | RHG18_HUMAN  | RHG18                 | Q8N392; Q58E22; Q6R78; Q6R9D7; Q6S64                                                                            | NP_277050                            | Rho GTPase-activating protein 18 (RhoG-type GTPase-activating protein 18) (MacP)                                                                                                                                                                                                                                                                        | GO:0005096; GO:0005622; GO:0005515; GO:0007165                                                                        | GTPase activator activity; intracellular; protein binding; signal transduction                                                                                                             |                                                                              | Phosphorylated - from this Study |                                       |                                    |          |
| 172 XRN1     | XRN1_HUMAN   | XRN1                  | Q81215; Q4G053; Q66D88; Q6A124; Q6MZ88; Q86W57; Q8N8U4; Q9JF39                                                  | NP_061874; NP_001036; 069            | 5'-3' exonuclease 1 (EC 3.1.11.-) (Strand-exchange protein 1 homolog)                                                                                                                                                                                                                                                                                   | GO:0008409; GO:0003677; GO:0003723; GO:0005737; GO:0045786; GO:0006139; GO:0005515                                    | 5'-3' exonuclease activity; DNA binding; RNA binding; cytoplasm; negative regulation of cell cycle; nucleobase, nucleoside, nucleotide and nucleic acid metabolic process; protein binding | Cytoplasm                                                                    | Phosphorylated - from this Study | Known in Uniprot to be phosphorylated |                                    |          |
| 173 PXDC2    | PXDC2_HUMAN  | PXDC2                 | Q6J071; Q6E659; Q6E659; Q6E659; Q6E659                                                                          | NP_116201                            | Pleisin domain-containing protein 2 (Tumor endothelial marker 7-related protein)                                                                                                                                                                                                                                                                        | GO:0016021                                                                                                            | integral to membrane                                                                                                                                                                       | MembraneSinglepasspeptideprotein                                             | Phosphorylated - from this Study |                                       |                                    |          |
| 174 FYB      | FYB_HUMAN    | FYB                   | O15117; Q00359                                                                                                  | NP_955367                            | FYN-binding protein (FYN-T-binding protein) (FYB-120/130) (p120/p130) (SLP-76-associated phosphoprotein) (SLAP-130) (Adhesion and degranulation promoting adaptor protein) (ADAP)                                                                                                                                                                       | GO:0006607; GO:0005737; GO:0006955; GO:0005634; GO:0006468; GO:0005515; GO:0007243                                    | NLS-bearing substrate import into nucleus; cytoplasm; immune response; nucleus; protein amino acid phosphorylation; protein binding; protein kinase cascade                                | CytoplasmNucleus                                                             | Phosphorylated - from this Study | Known in Uniprot to be phosphorylated | Known in HPRD to be phosphorylated |          |
| 175 AFAP1    | AFAP1_HUMAN  | Q9HBY1; Q8N556; AFAP1 | Q9HBY1; Q8N556; AK442; Q58EY5                                                                                   | NP_940997; NP_001128                 | Actin filament-associated protein 1 (110 kDa actin filament-associated protein) (AFAP-110)                                                                                                                                                                                                                                                              | GO:0005737; GO:0005737; GO:0005856                                                                                    | actin binding; cytoplasm; cytoskeleton                                                                                                                                                     | Cytoplasmcytoskeleton                                                        | Phosphorylated - from this Study | Known in Uniprot to be phosphorylated | Known in HPRD to be phosphorylated |          |
| 176 SLA12    | SLA12_HUMAN  | Q9P270; SLA12         | Q9P270; AK491                                                                                                   | XP_044434; NP_065897                 | SLAIN motif-containing protein 2                                                                                                                                                                                                                                                                                                                        |                                                                                                                       |                                                                                                                                                                                            |                                                                              | Phosphorylated - from this Study | Known in Uniprot to be phosphorylated |                                    |          |
| 177 SLK      | SLK_HUMAN    | SLK                   | Q8N5R3; Q9N252; Q00211; Q9P124; Q86W17; Q86W11; Q92603; Q9NQL2; Q9NQL1                                          | NP_055535                            | STE20-like serine/threonine-protein kinase (STE20-like kinase) (HSK) (EC 2.7.11.1) (STE20-related serine/threonine-protein kinase) (STE20-related kinase) (Serine/threonine-protein kinase 2) (CTCL tumor antigen se20-9)                                                                                                                               | GO:0005524; GO:0003677; GO:0006915; GO:0005737; GO:004518; GO:0006289; GO:0006467                                     | ATP binding; DNA binding; apoptosis; cytoplasm; nuclease activity; nucleotide-excision repair; protein amino acid phosphorylation; protein serine/threonine kinase activity                | Cytoplasm                                                                    | Phosphorylated - from this Study | Known in Uniprot to be phosphorylated |                                    | Kinase   |
| 178 URP2     | URP2_HUMAN   | URP2                  | Q86JX7; Q8JUA1; Q8N207; Q9E348                                                                                  | NP_848537; NP_113659                 | Fermitin family homolog 3 (Unc-112-related protein 2) (Kindlin-3) (MG2-like protein)                                                                                                                                                                                                                                                                    | GO:0007155; GO:0005737; GO:0005886; GO:0005515                                                                        | cell adhesion; cytoplasm; plasma membrane; protein binding                                                                                                                                 | CytoplasmCellmembrane                                                        | Phosphorylated - from this Study | Known in Uniprot to be phosphorylated | Fraction - this study              |          |
| 179 PLECI    | PLECI_HUMAN  | PLEC1; Q6S383         | Q6S383; Q15148; Q16640; Q6S377; Q6S378; Q6S379; Q6S380; Q6S381; Q6S382                                          | NP_958786; NP_000436; 1) (HD1)       | Plectin-1 (PLTN) (PCN) (Hemidesmosomal protein)                                                                                                                                                                                                                                                                                                         | GO:0003779; GO:0005737; GO:0005856; GO:0005886; GO:0008307                                                            | actin binding; cytoplasm; cytoskeleton; plasma membrane; structural constituent of muscle                                                                                                  | Cytoplasmcytoskeleton                                                        | Phosphorylated - from this Study | Known in Uniprot to be phosphorylated | Known in HPRD to be phosphorylated |          |
| 180 FBP1L    | FBP1L_HUMAN  | FBP1L                 | Q6K404; Q5T0N5; Q5T0N6; Q6B097; Q6P653; Q9XK1                                                                   | NP_060207; NP_001020                 | Formin-binding protein 1-like (Transducer of Cdc42 domain-containing protein 1) (Toca-1)                                                                                                                                                                                                                                                                | GO:0031410; GO:0005856; GO:0006897; GO:0008289; GO:0005886                                                            | cytoplasmic vesicle; cytoskeleton; endocytosis; lipid binding; plasma membrane                                                                                                             | CytoplasmCytoplasmcytoskeleton                                               | Phosphorylated - from this Study | Known in Uniprot to be phosphorylated |                                    |          |
| 181 ZO2      | ZO2_HUMAN    | ZO2; AZA3H9           | Q9XK1; Q9XK2; AZA3H9; Q5VXLD; Q15883; Q8N756; Q8N114; Q9S839; Q9JUD0; Q9JUD1                                    | NP_963923; NP_004808                 | Tight junction protein ZO-2 (Zonula occludens protein 2) (Zona occludens protein 2) (Tight junction protein 2); Tight junction protein 2 (Zona occludens 2)                                                                                                                                                                                             | GO:0005737; GO:0004385; GO:0005634; GO:0005515; GO:0005923                                                            | cytoplasm; guanylate kinase activity; nucleus; protein binding; tight junction                                                                                                             | CytoplasmCellmembrane                                                        | Phosphorylated - from this Study | Known in Uniprot to be phosphorylated | Known in HPRD to be phosphorylated |          |
| 182 TB88     | TB88_HUMAN   | Q8WZ78; TB88          | Q8WZ78; Q32CM7; Q35QX9                                                                                          | NP_817124                            | Tubulin beta-8 chain                                                                                                                                                                                                                                                                                                                                    | GO:0005525; GO:0003924; GO:0005874; GO:0007018; GO:0042334; GO:0051258; GO:0016021                                    | GTP binding; GTPase activity; microtubule; microtubule-based movement; protein complex; protein polymerization; structural molecule activity                                               |                                                                              | Phosphorylated - from this Study |                                       |                                    |          |
| 183 TMM24    | TMM24_HUMAN  | TMM24; CZC2L          | O14523; Q86J77; Q86V04; Q8N522; Q8T8M4; Q8G610                                                                  | NP_055622                            | C2 domain-containing protein 2-like (Transmembrane protein 24)                                                                                                                                                                                                                                                                                          | GO:0016021                                                                                                            | integral to membrane                                                                                                                                                                       | MembraneSinglepassmembraneprotein                                            | Phosphorylated - from this Study | Known in Uniprot to be phosphorylated |                                    |          |
| 184 LRMP     | LRMP_HUMAN   | LRMP                  | Q12912; A0A0W02; B46377; Q8N301; Q35H30; Q35J55; Q01TF3; Q35H41; Q6ZSC1; Q72365; Q72376; Q8NAU8; Q8NHU5; Q8N1U4 | NP_006143                            | Lymphoid-restricted membrane protein (Protein Jaw1) (Cleaved into: Processed lymphoid-restricted membrane protein)                                                                                                                                                                                                                                      | GO:0005789; GO:0005887; GO:0005634; GO:0006906; GO:0006903                                                            | endoplasmic reticulum membrane; integral to plasma membrane; nucleus; vesicle fusion; vesicle targeting                                                                                    | CytoplasmEndoplasmicreticulumMembrane                                        | Phosphorylated - from this Study | Known in Uniprot to be phosphorylated |                                    |          |
| 185 WDR44    | WDR44_HUMAN  | WDR44                 | Q9J5H3; Q01TF3; Q35H41; Q6ZSC1; Q72365; Q72376; Q8NAU8; Q8NHU5; Q8N1U4; Q9S839; Q9JUD0; Q9JUD1                  | NP_061918                            | WD repeat-containing protein 44 (Rabphilin-11)                                                                                                                                                                                                                                                                                                          | GO:0005794; GO:0010008                                                                                                | Golgi apparatus; endosome membrane                                                                                                                                                         | CellmembraneCytoplasm                                                        | Phosphorylated - from this Study | Known in Uniprot to be phosphorylated | Known in HPRD to be phosphorylated |          |
| 186 DEN2C    | DEN2C_HUMAN  | DEN2C                 | Q6B051; B1AL26; Q37C65; Q6P3R3                                                                                  | NP_940861                            | DENN domain-containing protein 2C                                                                                                                                                                                                                                                                                                                       |                                                                                                                       |                                                                                                                                                                                            |                                                                              | Phosphorylated - from this Study |                                       |                                    |          |
| 187 FAG2B    | FAG2B_HUMAN  | FAG2B; A4D229; EST72  | Q6UK14; AUC5R6; A4D229; Q6W122; Q6ZTU0; Q6ZVU11; Q9KQ50; Q9NW47; Q9JLJ2                                         | NP_065779; XP_034608                 | Extended synaptotagmin-2 (E-Sy2) (Chr25v1) ARF1 GAP (ADP-ribosylation factor-directed GTPase-activating protein 1) (ARF GTPase-activating protein 1) (Development and differentiation-enhancing factor 1) (Differentiation-enhancing factor 1) (DEF-1)                                                                                                  | GO:0016021; GO:0005886                                                                                                | integral to membrane; plasma membrane                                                                                                                                                      | CellmembraneMultipassmembraneprotein                                         | Phosphorylated - from this Study | Known in Uniprot to be phosphorylated | Known in HPRD to be phosphorylated |          |
| 188 DNCS     | DNCS_HUMAN   | DNCS; ABK0M0          | Q9J3Z2; ABK0M0; B3KV68; Q9J3Z5; Q9H7H2                                                                          | NP_079495; XP_028966                 | DnaJ homolog subfamily C member 5 (Cysteine string protein) (CSP)                                                                                                                                                                                                                                                                                       | GO:0031072; GO:0042470; GO:0016020; GO:0006474; GO:0005182                                                            | heat shock protein binding; melanosome; membrane; protein folding; unfolded protein binding                                                                                                | MembraneLipidanchoreMelanosome                                               | Phosphorylated - from this Study | Known in Uniprot to be phosphorylated | Known in HPRD to be phosphorylated |          |
| 189 DDEF1    | DDEF1_HUMAN  | DDEF1; ASAP1; B3RWV3  | Q9JLH1; B3RWV3                                                                                                  | NP_060952                            | Arf-GAP with SH3 domain, ANK repeat and PH domain-containing protein 1 (130 kDa phosphatidylinositol 4,5-bisphosphate-dependent ARF1 GTPase-activating protein) (PI3Z-dependent ARF1 GAP) (ADP-ribosylation factor-directed GTPase-activating protein 1) (ARF GTPase-activating protein 1) (Development and differentiation-enhancing factor 1) (DEF-1) | GO:0008060; GO:0005737; GO:0016020; GO:0005515; GO:0032312; GO:0008270                                                | ARF GTPase activator activity; cytoplasm; membrane; protein binding; regulation of ARF GTPase activity; zinc ion binding                                                                   | CytoplasmMembrane                                                            | Phosphorylated - from this Study | Known in Uniprot to be phosphorylated |                                    |          |
| 190 UN13D    | UN13D_HUMAN  | UN13D                 | Q70399; Q9H7K5                                                                                                  | NP_954712                            | Protein unc-13 homolog D (Munc13-4)                                                                                                                                                                                                                                                                                                                     | GO:0005737; GO:0016020                                                                                                | cytoplasm; membrane                                                                                                                                                                        | CytoplasmMembrane                                                            | Phosphorylated - from this Study | Known in Uniprot to be phosphorylated |                                    |          |

| Protein Name | Uniprot Name | Other Names | Uniprot ID                                   | Refseq IDs                                                                                                                                                                                                                            | Protein Description                                                         | GO ID                                                                                                                                                                                                                                                                                                                                           | GO terms                                                                                                                                                                                                                                                                                                                                       | Subcellular location                                                                                                                                                                                                                                                                                                                                                                                                                                                                                                                                                    | Comments                                                                                                                                    | Comments                              | Comments - Database Search            | Comments - Database Search         | Function |  |
|--------------|--------------|-------------|----------------------------------------------|---------------------------------------------------------------------------------------------------------------------------------------------------------------------------------------------------------------------------------------|-----------------------------------------------------------------------------|-------------------------------------------------------------------------------------------------------------------------------------------------------------------------------------------------------------------------------------------------------------------------------------------------------------------------------------------------|------------------------------------------------------------------------------------------------------------------------------------------------------------------------------------------------------------------------------------------------------------------------------------------------------------------------------------------------|-------------------------------------------------------------------------------------------------------------------------------------------------------------------------------------------------------------------------------------------------------------------------------------------------------------------------------------------------------------------------------------------------------------------------------------------------------------------------------------------------------------------------------------------------------------------------|---------------------------------------------------------------------------------------------------------------------------------------------|---------------------------------------|---------------------------------------|------------------------------------|----------|--|
| 191          | FINC         | FINC_HUMAN  | FINC; Q9UQ56; Q6N0A6; Q6MZF4; Q6N0B4; Q6N0Z5 | P12751; O95609; O95610; Q14132; Q14325; Q14326; Q17RV7; Q58572; Q58573; Q60FE4; Q60FE5; Q68DP8; Q68DP9; Q68DT4; Q6LDP6; Q6MZL5; Q6N0Z5; Q6NDA6; Q85T27; Q8IV8; Q96KP7; Q96KP8; Q96KP9; Q9I1B8; Q9HAP3; Q9UKM2; Q9UQ56; Q6MZF4; Q6N0B4 | NP_997640; NP_002017; NP_473375; NP_997639; NP_997641; NP_997647; NP_997643 | Fibronectin (FN) [Cold-insoluble globulin] (CIG) [Cleaved into: Ugl-Y1; Ugl-Y2; Ugl-Y3]; Putative uncharacterized protein DKFZp686B219 (Putative uncharacterized protein DKFZp686B13) Putative uncharacterized protein Q6MZF4 (Fragment); Putative uncharacterized protein Q14325 (Fragment); DKFZp686L11144 (Fragment); Fibronectin (Fragment) | GO:0005793; GO:0006953; GO:0007155; GO:0016477; GO:0005518; GO:0005201; GO:0005572; GO:0008201; GO:0181349; GO:0031093; GO:0005578; GO:0008360; GO:0007169; GO:0016324; GO:0005604; GO:0007160; GO:0007044; GO:0016504; GO:0005515; GO:0042060; GO:0005576;                                                                                    | ER-Golgi intermediate compartment; acute-phase response; cell adhesion; cell migration; collagen binding; extracellular matrix structural constituent; fibrinogen complex; heparin binding; peptide cross-linking; platelet alpha granule lumen; proteoglycan; extracellular matrix; regulation of cell shape; transmembrane receptor protein tyrosine kinase signaling pathway; apical plasma membrane; basement membrane; cell-matrix adhesion; cell-substrate junction assembly; peptidase activator activity; protein binding; wound healing; extracellular region; | SecretedExtracellularMatrix; paxextracellularmatrix; Phosphorylated - from this Study                                                       | Membrane-Fraction - this study        | Known in Uniprot to be phosphorylated |                                    |          |  |
| 192          | MYLK         | MYLK_HUMAN  | MYLK; Q6P2N0                                 | Q15746; Q72400; O95796; O95797; O95798; O95799; Q14844; Q16794; Q5M1Y9; Q5M1Y0; Q9C0L5; Q9UBS5; Q9UIT9; Q6F2N0; Q17515                                                                                                                | NP_444254; NP_009596; NP_444253; NP_444255; NP_444256; NP_444259            | Myosin light chain kinase, smooth muscle (MLCK) (EC 2.7.11.18) (Telokin) (Kinase-related protein) (KRP); Myosin light chain kinase (Myosin, light polypeptide kinase, isoform CRA 1) (COWA); FL395192, Homo sapiens myosin, light polypeptide kinase (MYLK), transcript variant 7, mRNA                                                         | GO:0005524; GO:0005509; GO:0005516; GO:0002887; GO:0004687; GO:0006468;                                                                                                                                                                                                                                                                        | ATP binding; calcium ion binding; calmodulin binding; magnesium ion binding; myosin light chain kinase activity; protein amino acid phosphorylation; kinase activity                                                                                                                                                                                                                                                                                                                                                                                                    | Phosphorylated - from this Study                                                                                                            | Known in Uniprot to be phosphorylated | Known in HPRD to be phosphorylated    | Kinase                             |          |  |
| 193          | KAP3         | KAP3_HUMAN  | KAP3; A4D0R9                                 | P31323; A4D0R9                                                                                                                                                                                                                        | NP_002727                                                                   | cAMP-dependent protein kinase type II-beta regulatory subunit                                                                                                                                                                                                                                                                                   | GO:0005794; GO:0030552; GO:0005952; GO:0008603; GO:0005813; GO:0009755; GO:0005739; GO:0001932                                                                                                                                                                                                                                                 | Golgi apparatus; cAMP binding; cAMP-dependent protein kinase complex; cAMP-dependent protein kinase regulator activity; centrosome; hormone-mediated signaling; mitochondrion; regulation of protein amino acid phosphorylation                                                                                                                                                                                                                                                                                                                                         | Phosphorylated - from this Study                                                                                                            | Known in Uniprot to be phosphorylated | Known in HPRD to be phosphorylated    |                                    |          |  |
| 194          | KPCB         | KPCB_HUMAN  | KPCB                                         | P05771; Q43129; P05127; Q15138; Q91360; Q9UE49; Q9UE50; Q9UEH8; Q9UJ30; Q9UJ33; Q9UJ34                                                                                                                                                | NP_997700; NP_002729                                                        | Protein kinase C beta type (PKC-beta) (PKC-B) (EC 2.7.11.13)                                                                                                                                                                                                                                                                                    | GO:0005524; GO:0005529; GO:0005829; GO:0019992; GO:0007242; GO:0042953; GO:0005886; GO:0006468; GO:0005515; GO:0004697; GO:0005524; GO:0004699; GO:0005829; GO:0019992; GO:0008047; GO:0019899; GO:0043560; GO:0007242; GO:0016000; GO:0046627; GO:0050732; GO:0032091; GO:0005634; GO:0008022; GO:0050821; GO:0010469; GO:0010149; GO:0008270 | ATP binding; calcium ion binding; cytosol; diacylglycerol binding; intracellular signaling cascade; lipoprotein transport; plasma membrane; protein amino acid phosphorylation; protein binding; protein kinase C activity; zinc ion binding                                                                                                                                                                                                                                                                                                                            | CytoplasmMembranePe; ripheralmembraneprotein - from this Study                                                                              | Known in Uniprot to be phosphorylated | Known in HPRD to be phosphorylated    | Kinase                             |          |  |
| 195          | KPCD         | KPCD_HUMAN  | KPCD; Q86XJ6                                 | Q86XJ6; Q58655; B28384; Q15144                                                                                                                                                                                                        | NP_997704; NP_006245                                                        | Protein kinase C delta type (EC 2.7.11.13) (nPKC-delta)                                                                                                                                                                                                                                                                                         | GO:0005524; GO:0004699; GO:0005829; GO:0019992; GO:0008047; GO:0019899; GO:0043560; GO:0007242; GO:0016000; GO:0046627; GO:0050732; GO:0032091; GO:0005634; GO:0008022; GO:0050821; GO:0010469; GO:0010149; GO:0008270                                                                                                                         | ATP binding; calcium-independent protein kinase C activity; cytosol; diacylglycerol binding; enzyme activator activity; enzyme binding; insulin receptor substrate binding; intracellular signaling cascade; membrane; negative regulation of insulin receptor signaling pathway; negative regulation of peptidyl-tyrosine phosphorylation; negative regulation of protein binding; nucleus; protein C-terminus binding; protein stabilization; regulation of receptor activity; senescence; zinc ion binding                                                           | CytoplasmMembranePe; ripheralmembraneprotein - from this Study                                                                              | Known in Uniprot to be phosphorylated | Known in HPRD to be phosphorylated    | Kinase                             |          |  |
| 196          | GP1BA        | GP1BA_HUMAN | GP1BA; ASCKE2                                | P07359; Q14441; Q15489; Q8N1F3; Q8N6C9; Q9H8C7; Q9UEK1; Q9UQ54; ASCKE2                                                                                                                                                                | NP_000164                                                                   | Platelet glycoprotein Ib alpha chain (Glycoprotein Iba) (GP-Ib alpha) (GPb-alpha) (GP1BA) (Antigen CD42b-alpha) (CD antigen CD42b) [Cleaved into: Glycocalcin]                                                                                                                                                                                  | GO:0007155; GO:0007166; GO:0042730; GO:0005687; GO:0005624; GO:0030168; GO:0031092; GO:0005515; GO:0015057                                                                                                                                                                                                                                     | cell adhesion; cell surface receptor linked signal transduction; fibrinolysis; integral to plasma membrane; membrane fraction; platelet activation; platelet alpha granule membrane; protein binding; thrombin receptor activity                                                                                                                                                                                                                                                                                                                                        | MembraneSinglepass; ripheralmembraneprotein - from this Study                                                                               | Phosphorylated - from this Study      | Known in Uniprot to be phosphorylated |                                    |          |  |
| 197          | HMHA1        | HMHA1_HUMAN | Q6P1B9; Q92619; Q8HX84; HMHA1                | Q8HX84; Q6P1B9; Q92619; Q7LE26; Q86W51; Q6C3N0; Q9C1P0; Q9C1P1; Q9MY24; Q9UBW5; Q86V07; Q9NWK4; Q9UKM4; Q13509; Q9BT20; Q9BW10                                                                                                        | NP_036424                                                                   | Minor histocompatibility protein HA-1 [Cleaved into: Minor histocompatibility antigen HA-1 (MHA-1)]                                                                                                                                                                                                                                             | GO:0005096; GO:0019992; GO:0006022; GO:0007242; GO:0008270                                                                                                                                                                                                                                                                                     | GTase activator activity; diacylglycerol binding; intracellular; intracellular signaling cascade; zinc ion binding                                                                                                                                                                                                                                                                                                                                                                                                                                                      | Phosphorylated - from this Study                                                                                                            | Known in Uniprot to be phosphorylated |                                       |                                    |          |  |
| 198          | BIN2         | BIN2_HUMAN  | BIN2                                         | NP_057377; XP_293762                                                                                                                                                                                                                  | NP_057377                                                                   | Bridging integrator 2 (Breast cancer-associated protein 1)                                                                                                                                                                                                                                                                                      | GO:0005737; GO:0005515                                                                                                                                                                                                                                                                                                                         | cytoplasm; protein binding                                                                                                                                                                                                                                                                                                                                                                                                                                                                                                                                              | Cytoplasm                                                                                                                                   | Phosphorylated - from this Study      |                                       |                                    |          |  |
| 199          | TBB3         | TBB3_HUMAN  | TBB3                                         | NP_006077                                                                                                                                                                                                                             | Q9UKM4; Q13509; Q9BT20; Q9BW10                                              | Q9UKM4; Q13509; Q9BT20; Q9BW10                                                                                                                                                                                                                                                                                                                  | Tubulin beta-3 chain (Tubulin beta-III) (Tubulin beta-4)                                                                                                                                                                                                                                                                                       | GO:0005525; GO:0003924; GO:0005874; GO:0007018; GO:0042334; GO:0051258; GO:0005198; GO:0016021                                                                                                                                                                                                                                                                                                                                                                                                                                                                          | GTP binding; GTase activity; microtubule; microtubule-based movement; protein complex; protein polymerization; structural molecule activity | Phosphorylated - from this Study      |                                       | Known in HPRD to be phosphorylated |          |  |
| 200          | TMB1         | TMB1_HUMAN  | TMB1; B3KQY6                                 | Q969X1; Q8N1R3; Q8TAM3; Q9K131; B3KQY6                                                                                                                                                                                                | NP_071435                                                                   | Transmembrane BAX inhibitor motif-containing protein 1 (Protein RECS1 homolog)                                                                                                                                                                                                                                                                  | GO:0005524; GO:0005886                                                                                                                                                                                                                                                                                                                         | integral to membrane                                                                                                                                                                                                                                                                                                                                                                                                                                                                                                                                                    | MembraneMulti-pass; ripheralmembraneprotein                                                                                                 | Phosphorylated - from this Study      | Known in Uniprot to be phosphorylated |                                    |          |  |
| 201          | LY66F        | LY66F_HUMAN | Q7ZSH2; LY66F; B0UXK7                        | Q7ZSH2; Q5SQ64; Q95869; Q9KSC7; B0UXK7                                                                                                                                                                                                | NP_0010036                                                                  | Lymphocyte antigen 6 complex locus protein 66f 93                                                                                                                                                                                                                                                                                               | GO:0016021; GO:0005886                                                                                                                                                                                                                                                                                                                         | integral to membrane; plasma membrane                                                                                                                                                                                                                                                                                                                                                                                                                                                                                                                                   | CellMembraneSingle; ripheralmembraneprotein - from this Study                                                                               | Phosphorylated - from this Study      | Known in Uniprot to be phosphorylated | Known in HPRD to be phosphorylated |          |  |
| 202          | FKB15        | FKB15_HUMAN | Q5T1M5; Q5D8M8; Q5T1M2; Q6DD85; Q9V4D0       | XP_376903; NP_056073                                                                                                                                                                                                                  | XP_376903; NP_056073                                                        | FK506-binding protein 15                                                                                                                                                                                                                                                                                                                        | GO:0005737; GO:0006457                                                                                                                                                                                                                                                                                                                         | cytoplasm; protein folding                                                                                                                                                                                                                                                                                                                                                                                                                                                                                                                                              | CytoplasmCellprojectio; naxon                                                                                                               | Phosphorylated - from this Study      | Known in Uniprot to be phosphorylated |                                    |          |  |
| 203          | RPG2         | RPG2_HUMAN  | Q684P5; Q684P4; RPG2                         | Q684P5; Q684P4; B2R7Y5; Q6A100; Q62VFO; Q9LPW2                                                                                                                                                                                        | NP_055900; NP_085748; NP_001093                                             | Rap1 GTPase-activating protein 2 (Rap1GAP2) (GTPase-activating Rap/Ran-GAP domain-like protein 4) 868                                                                                                                                                                                                                                           | GO:0005096; GO:0005737; GO:0051056                                                                                                                                                                                                                                                                                                             | GTase activator activity; cytoplasm; regulation of small GTase mediated signal transduction                                                                                                                                                                                                                                                                                                                                                                                                                                                                             | CytoplasmCytoplasm; rineruicregion                                                                                                          | Phosphorylated - from this Study      | Known in Uniprot to be phosphorylated |                                    |          |  |
| 204          | RHG17        | RHG17_HUMAN | RHG17                                        | NP_0010066; AKG096; Q6C0S4; Q7ZF22; Q8M0C2; Q96KS2; Q96KS3; Q96SS8; Q9BVF6; Q9HBU5; Q9HWS4                                                                                                                                            | NP_0010066; NP_060524                                                       | Rho GTPase-activating protein 17 (Rho-type GTPase-activating protein 17) (RhoGAP interacting with CP4 homologs protein 1) (RICH-1)                                                                                                                                                                                                              | GO:0005096; GO:0007124; GO:0005737; GO:0007165; GO:0005923                                                                                                                                                                                                                                                                                     | GTase activator activity; SH3 domain binding; cytoplasm; signal transduction; tight junction                                                                                                                                                                                                                                                                                                                                                                                                                                                                            | MembranePeriplasm; ripheralmembraneprotein; Cytop; asnCelljunction; rign; nction                                                            | Phosphorylated - from this Study      | Known in Uniprot to be phosphorylated |                                    |          |  |
| 205          | TNIK         | TNIK_HUMAN  | TNIK; A7E2A3                                 | Q9UKES; Q6G298; Q9HUY7; Q9UKDB; Q9UKDP; Q9UKED; Q9UKEL; Q9UKER; Q9UKES; Q9UKEL4; A7E2A3                                                                                                                                               | NP_055843                                                                   | TRAF2 and NCK-interacting protein kinase (EC 2.7.11.1)                                                                                                                                                                                                                                                                                          | GO:0005524; GO:0007254; GO:0006468; GO:0005515; GO:0004674; GO:0005083                                                                                                                                                                                                                                                                         | ATP binding; JNK cascade; protein amino acid phosphorylation; protein binding; protein serine/threonine kinase activity; small GTase regulator activity                                                                                                                                                                                                                                                                                                                                                                                                                 | Phosphorylated - from this Study                                                                                                            | Known in Uniprot to be phosphorylated | Known in HPRD to be phosphorylated    | Kinase                             |          |  |
| 206          | CT032        | CT032_HUMAN | CT032; CASS4                                 | Q9N075; Q96K09; Q98VLS                                                                                                                                                                                                                | NP_065089                                                                   | Cas scaffolding protein family member 4 (HEF1-EFS-p130Cas-like protein) (HEPL) (HEF-like protein)                                                                                                                                                                                                                                               | GO:0007155; GO:0030054; GO:0005737; GO:0005856; GO:0005515; GO:0007165; GO:0001155; GO:0007275; GO:0003676                                                                                                                                                                                                                                     | cell adhesion; cell junction; cytoplasm; cytoskeleton; protein binding; signal transduction; two-component sensor on                                                                                                                                                                                                                                                                                                                                                                                                                                                    | Cytoplasmcytoskeleton; Celljunction; focaladhesi; on                                                                                        | Phosphorylated - from this Study      | Known in Uniprot to be phosphorylated |                                    |          |  |
| 207          | PIWL3        | PIWL3_HUMAN | PIWL3                                        | Q7Z3Z3                                                                                                                                                                                                                                | NP_0010084                                                                  | Piwi-like protein 3 96                                                                                                                                                                                                                                                                                                                          | GO:0007155; GO:0001155; GO:0007275; GO:0003676                                                                                                                                                                                                                                                                                                 | multicellular organismal development; nucleic acid binding                                                                                                                                                                                                                                                                                                                                                                                                                                                                                                              | Cytoplasm                                                                                                                                   | Phosphorylated - from this Study      |                                       |                                    |          |  |

| Protein Name | Uniprot Name | Other Names                                  | Uniprot Refseq IDs                                                                            | Protein Description                                                                                                                                                                                                                                                                           | GO ID                                                                                                                                                                              | GO terms                                                                                                                                                                                                                                                                                                                                                                                                                              | Subcellular location                                 | Comments                              | Comments - Database Search            | Comments - Database Search         | Function |
|--------------|--------------|----------------------------------------------|-----------------------------------------------------------------------------------------------|-----------------------------------------------------------------------------------------------------------------------------------------------------------------------------------------------------------------------------------------------------------------------------------------------|------------------------------------------------------------------------------------------------------------------------------------------------------------------------------------|---------------------------------------------------------------------------------------------------------------------------------------------------------------------------------------------------------------------------------------------------------------------------------------------------------------------------------------------------------------------------------------------------------------------------------------|------------------------------------------------------|---------------------------------------|---------------------------------------|------------------------------------|----------|
| 208          | FRH1_HUMAN   | FRH1; B3KXRS                                 | P02794; Q3KRA8; Q15WV1; B3KXRS                                                                | NP_002023 Ferritin heavy chain (Ferritin H subunit) (EC 1.16.3.1) (Cell proliferation-inducing gene 15 protein)                                                                                                                                                                               | GO:0008199; GO:0004322; GO:0006955; GO:0008043; GO:0006880; GO:0006826; GO:0008285; GO:0055114; GO:0003779; GO:0015699; GO:0042805; GO:0005929; GO:0005244; GO:0005080; GO:0008270 | ferric iron binding; ferroxidase activity; immune response; intracellular ferritin complex; intracellular sequestration of iron ion; iron ion transport; negative regulation of cell proliferation; oxidation reduction; protein binding                                                                                                                                                                                              | Phosphorylated - from this Study                     | Known in Uniprot to be phosphorylated | Known in HPRD to be phosphorylated    |                                    |          |
| 209          | PDLI5_HUMAN  | PDLI5; Q8WVK0                                | Q96H4; ARK6F9; Q8WVK0; O60705; Q51W38; NP_0010115                                             | NP_006448; PDZ and LIM domain protein 5 (Enigma homolog); NP_001011 (Enigma-like PDZ and LIM domain protein); PDZ and LIM domain 5 (cDNA FLJ17159, highly similar to Homo sapiens PDZ and LIM domain 5 (DOLIM5)); transcript variant 5, mRNA (PDZ and LIM domain NP_0010115 5, isoform CRA_b) | GO:0005525; GO:0007777; GO:0000910; GO:0007067; GO:0005634; GO:0005515; GO:0051291; GO:0031105; GO:0008199; GO:0001725; GO:0005488                                                 | actin binding; actin cytoskeleton; actinin binding; cytosol; membrane fraction; protein kinase C binding; zinc ion binding                                                                                                                                                                                                                                                                                                            | Phosphorylated - from this Study                     | Known in Uniprot to be phosphorylated |                                       |                                    |          |
| 210          | SEPT7_HUMAN  | SEPT7; Q3B7A3                                | Q16181; Q52M76; Q8KX0; Q3B7A3                                                                 | NP_001779; Septin-7 (CDC10 protein homolog)                                                                                                                                                                                                                                                   | GO:0005525; GO:0007777; GO:0000910; GO:0007067; GO:0005634; GO:0005515; GO:0051291; GO:0031105; GO:0008199; GO:0001725; GO:0005488                                                 | GTP binding; condensed chromosome kinetochore; cytokinesis; mitosis; nucleus; protein binding; protein heterooligomerization; septin complex; spindle; stress fiber; structural molecule activity                                                                                                                                                                                                                                     | CytoplasmKinetochore Spindle                         | Phosphorylated - from this Study      | Known in Uniprot to be phosphorylated |                                    |          |
| 211          | TTC7B_HUMAN  | TTC7B; Q69IF1                                | Q86TV6; Q86U24; Q86VT3; Q69IF1                                                                | NP_0010108 Tetratricopeptide repeat protein 7B (TPR repeat protein 7B) (Tetratricopeptide repeat protein 7-like 1); TTC7B protein (Fragment)                                                                                                                                                  | GO:0005525; GO:0003034; GO:0005938; GO:0005856; GO:0006468; GO:0005886; GO:0004802; GO:0006955; GO:0030027                                                                         | binding                                                                                                                                                                                                                                                                                                                                                                                                                               | Phosphorylated - from this Study                     | Known in Uniprot to be phosphorylated |                                       |                                    |          |
| 212          | HUWE1_HUMAN  | HUWE1                                        | Q72827; Q15029; Q46222; Q5H961; Q6F4D0; Q8H657; Q9BU0; Q9HC14; Q9NSL6; Q9POA9                 | NP_113584 E3 ubiquitin-protein ligase HUWE1 (EC 6.3.2.-) (HECT, UBA and WWE domain-containing protein modification-dependent protein catabolic process; nucleus; protein binding; protein polyubiquitination; ubiquitin-protein ligase activity)                                              | GO:0003677; GO:0030154; GO:0005737; GO:0016574; GO:0019941; GO:0005634; GO:0005515; GO:0002099; GO:0004842                                                                         | DNA binding; cell differentiation; cytoplasm; histone ubiquitination; modification-dependent protein catabolic process; nucleus; protein binding; protein polyubiquitination; ubiquitin-protein ligase activity                                                                                                                                                                                                                       | CytoplasmNucleus                                     | Phosphorylated - from this Study      | Known in Uniprot to be phosphorylated | Known in HPRD to be phosphorylated |          |
| 213          | DBNL_HUMAN   | DBNL; A4D219                                 | Q9JUU6; A4D219; P84070; Q6KRA8; Q9RF30; Q96K74; Q9H8NB; Q9NR72                                | NP_0010144 Drebrin-like protein (Drebrin-F) (SH3 domain-containing protein 7) (Cervical SH3P7) (HPK1-P84070); interacting protein of 55 kDa (HIP-55) (Cervical Q6KRA8); NP_0011164 mucin-associated protein 2B (Q9RF30); Q96K74; Q9H8NB; Q9NR72                                               | GO:0016601; GO:0003037; GO:0005938; GO:0005856; GO:0006468; GO:0008047; GO:0042802; GO:0006955; GO:0030027                                                                         | Rac protein signal transduction; activation of Jun kinase activity; cell cortex; cytoskeleton; endocytosis; enzyme activator activity; identical protein binding; immune response; lamellipodium                                                                                                                                                                                                                                      | CytoplasmCytoskeleton Cellprojectionsperiplerajidum  | Phosphorylated - from this Study      | Known in Uniprot to be phosphorylated | Known in HPRD to be phosphorylated |          |
| 214          | EXOC7_HUMAN  | EXOC7; Q63HF7                                | Q9HPT5; Q8ND93; Q8WV91; Q96FF0; Q9H8C3; Q9H9X3; Q9HA32; Q63HF7; Q9H7M9; Q6UXF3; Q9WU3; Q8WVZ8 | NP_0010138 Exocyst complex component 7 (Exocyst complex component Exo70); Putative uncharacterized protein (NP_056034); protein DKFZ686P1551 (NP_0011387 69)                                                                                                                                  | GO:0034451; GO:0003034; GO:0006487; GO:0005886; GO:0015031; GO:0000145                                                                                                             | centriolar satellite; exocyst; exocytosis; plasma membrane; protein transport; exocyst                                                                                                                                                                                                                                                                                                                                                | CytoplasmCytosolCell membraneperiplerajidum          | Phosphorylated - from this Study      | Known in Uniprot to be phosphorylated |                                    |          |
| 215          | GI24_HUMAN   | GI24                                         | Q9H7M9; Q6UXF3; Q9WU3; Q8WVZ8                                                                 | NP_071436 Platelet receptor GI24                                                                                                                                                                                                                                                              | GO:0016021; GO:0004872                                                                                                                                                             | integral to membrane; receptor activity                                                                                                                                                                                                                                                                                                                                                                                               | MembraneSinglepassytpelmembraneprotein               | Phosphorylated - from this Study      | Known in Uniprot to be phosphorylated |                                    |          |
| 216          | ILK_HUMAN    | ILK                                          | Q13418; Q9H8C3; P57043                                                                        | NP_0010147 Integrin-linked protein kinase (EC 2.7.11.1) (ILK-1) (ILK-2) (SF1) (Lysine/threonine-protein kinase) (p59ILK)                                                                                                                                                                      | GO:0005524; GO:0003037; GO:0007229; GO:0006468; GO:0005515; GO:0004874; GO:0004713; GO:0009966                                                                                     | ATP binding; cell-matrix adhesion; integrin-mediated signaling pathway; protein amino acid phosphorylation; protein binding; protein serine/threonine kinase activity; protein tyrosine kinase activity; regulation of signal transduction                                                                                                                                                                                            | Celljunctionfocaladhesi onCellmembraneperiplerajidum | Phosphorylated - from this Study      | Known in Uniprot to be phosphorylated | Known in HPRD to be phosphorylated |          |
| 217          | HS90A_HUMAN  | HS90A; Q5CAQ7; Q85X1; ARK500                 | Q5CAQ7; P07900; Q2P914; Q5CAQ6; Q9H8C3; Q85X1; NP_291550; NP_210540; NP_0010135               | NP_0010179 Heat shock protein HSP 90-alpha (HSP 86) (Renal carcinoma antigen NY-REN-38)                                                                                                                                                                                                       | GO:0005524; GO:0003037; GO:0004874; GO:0005515; GO:0004713; GO:0009966                                                                                                             | ATP binding; TPR domain binding; cellular chaperone-mediated protein complex assembly; cytosol; melanosome; mitochondrial outer membrane translocase complex assembly; mitochondrial transport; nitric oxide synthase regulator activity; positive regulation of nitric oxide biosynthetic process; protein homodimerization activity; protein refolding; response to unfolded protein; signal transduction; unfolded protein binding | CytoplasmMelanosome                                  | Phosphorylated - from this Study      | Known in Uniprot to be phosphorylated | Known in HPRD to be phosphorylated |          |
| 218          | RHG08_HUMAN  | RHG08; Q6P9W1; PTOR1                         | Q9NSG0; P85299; Q75983; Q95695; Q5B1W2; Q5E1A9; NP_0010175                                    | NP_0010175 Rho GTPase-activating protein 8 (Rho-type GTPase-activating protein 8); ARHGAP8 protein (Fragment)                                                                                                                                                                                 | GO:0003037; GO:0003079; GO:0005737; GO:0006468; GO:0005515; GO:0007044; GO:0005925                                                                                                 | actin binding; cell junction; cytoplasm; cytoskeleton; protein binding; cell migration; cell-substrate junction assembly; focal adhesion                                                                                                                                                                                                                                                                                              | Celljunctionfocaladhesi onCytosolCytoskeleton        | Phosphorylated - from this Study      | Known in Uniprot to be phosphorylated |                                    |          |
| 219          | TENS1_HUMAN  | TENS1; Q9UFH8; Q4ZG71; Q8VB0; Q59G71         | Q4ZG71; Q59G71; Q8VB0; Q9UFH8                                                                 | NP_072174 Tensin-1; Tensin variant (Fragment); TNFS1 protein; Putative uncharacterized protein (DKFZ434G162 (Fragment))                                                                                                                                                                       | GO:0003037; GO:0003079; GO:0005737; GO:0006468; GO:0005515; GO:0007044; GO:0005925                                                                                                 | actin binding; cell junction; cytoplasm; cytoskeleton; protein binding; cell migration; cell-substrate junction assembly; focal adhesion                                                                                                                                                                                                                                                                                              | Celljunctionfocaladhesi onCytosolCytoskeleton        | Phosphorylated - from this Study      | Known in Uniprot to be phosphorylated |                                    |          |
| 220          | SKIV2_HUMAN  | SKIV2; Q9NPK3                                | Q55T66; Q15477; Q15095; Q12902; Q15476; Q9NPK3                                                | NP_008860 Helicase SKI2W (EC 3.6.1.-) (Helicase-like protein) (HLP); Superkiller viralidic activity 2-like (S. cerevisiae); D134F7.7 (Superkiller viralidic activity 2 (S. cerevisiae homolog)-like (SKI2W))                                                                                  | GO:0005524; GO:0004004; GO:0003723; GO:0005634; GO:0005515; GO:0008036; GO:0051059; GO:0005829; GO:0006956; GO:0003676; GO:0043234; GO:0007594; GO:0006986                         | ATP binding; ATP-dependent RNA helicase activity; RNA binding; nucleus; protein binding; ATP-dependent helicase activity; NF-kappaB binding; cytosol; defense response; nucleic acid binding; protein complex; response to nutrient; response to unfolded protein                                                                                                                                                                     | Nucleus; Cytoplasm                                   | Phosphorylated - from this Study      | Known in Uniprot to be phosphorylated | Known in HPRD to be phosphorylated |          |
| 221          | DUET_HUMAN   | DUET; KALRN                                  | Q9Z2A5; Q60229; ABM514; Q62N45; Q8TQ25; Q9NS24                                                | NP_008995; Kallirin (EC 2.7.11.1) (Huntingtin-associated protein-interacting protein) (Protein Duet)                                                                                                                                                                                          | GO:0005524; GO:0005989; GO:0015699; GO:0005737; GO:0002875; GO:0007399; GO:0006468; GO:0005515; GO:0004674; GO:0016192                                                             | ATP binding; Rho guanyl-nucleotide exchange factor activity; actin cytoskeleton; cytosol; magnesium ion binding; nervous system development; protein amino acid phosphorylation; protein binding; protein serine/threonine kinase activity; regulation of Rho protein signal transduction; vesicle-mediated transport                                                                                                                 | CytoplasmCytosolCytoskeleton                         | Phosphorylated - from this Study      | Known in Uniprot to be phosphorylated | Kinase                             |          |
| 222          | H1BP3_HUMAN  | H1BP3; Q86VC2; Q9H7U7; Q8N367; Q53T59; H1BP3 | Q53T59; Q86VC2; Q8N367; Q53T59; Q9H7U7                                                        | NP_071905 HCLS1-binding protein 3 (HSL-binding protein 3) (HSP1BP-3); cDNA FLJ14249 fs, clone OVARC1001200, weakly similar to Mus musculus HSL binding protein 3                                                                                                                              | GO:003023; GO:0007154; GO:0035091; GO:0005515                                                                                                                                      | cell communication; phosphoinositide binding; protein binding                                                                                                                                                                                                                                                                                                                                                                         | Phosphorylated - from this Study                     | Known in Uniprot to be phosphorylated |                                       |                                    |          |
| 223          | ABC1_HUMAN   | ABC1; A2BEP; Q69YF6; A2BF75                  | Q8NE71; Q148R7; Q69YF6; A2BF75                                                                | NP_0010202 ATP-binding cassette sub-family F member 1 (ATP-binding cassette 5) (TRN-alpha-stimulated ABC protein)                                                                                                                                                                             | GO:0005524; GO:0016205; GO:0006954; GO:0006412; GO:0008135                                                                                                                         | ATP binding; ATPase activity, coupled to transmembrane movement of substance; inflammatory response; translation; translation factor activity, nucleic acid binding                                                                                                                                                                                                                                                                   | Phosphorylated - from this Study                     | Known in Uniprot to be phosphorylated | Known in HPRD to be phosphorylated    |                                    |          |
| 224          | KSRI_HUMAN   | KSRI; ABMY87                                 | Q8U7T5; Q13474; Q8U7T5; ABMY87                                                                | NP_055053 Kinase suppressor of Ras 1                                                                                                                                                                                                                                                          | GO:0005524; GO:0007265; GO:0005737; GO:0019992; GO:0016030; GO:0006468; GO:0005515; GO:0004674; GO:0004713; GO:0008270                                                             | ATP binding; Ras protein signal transduction; cytoplasm; diacylglycerol binding; membrane; protein amino acid phosphorylation; protein binding; protein serine/threonine kinase activity; protein tyrosine kinase activity; zinc ion binding                                                                                                                                                                                          | CytoplasmMembranePeriplerajidum                      | Phosphorylated - from this Study      | Known in Uniprot to be phosphorylated | Kinase                             |          |
| 225          | MAVS_HUMAN   | MAVS; Q2HWT5                                 | Q7Z434; Q2HWT5; Q31072; Q57716; Q8QY77; Q9H1H3; Q9H4Y1; Q9H8D3; Q9ULE9                        | NP_065797 Mitochondrial antiviral-signaling protein (Interferon-beta promoter stimulator protein 1) (IPS-1) (Virus-induced-signaling adapter) (CARD adapter inducing interferon-beta) (Cardif) (Putative NF-kappa-B-activating protein Q31N)                                                  | GO:0005524; GO:0007154; GO:0044419; GO:0005741; GO:0041123; GO:0005515; GO:0009615; GO:0004871                                                                                     | innate immune response; integral to membrane; interspecies interaction between organisms; mitochondrial outer membrane; positive regulation of I-kappaB kinase/NF-kappaB cascade; protein binding; response to virus; signal transducer activity                                                                                                                                                                                      | Mitochondrionouter membrane                          | Phosphorylated - from this Study      | Known in Uniprot to be phosphorylated |                                    |          |

| Protein Name | Uniprot Name | Other Names  | Uniprot RefSeq IDs    | Protein Description                                                   | GO ID                                                  | GO terms                                                                                                                                                              | Subcellular location                                                                                                                                                                                                               | Comments                                                                                                                                                                                                                                                                                                                                                                                                                                                                                                                                                                                                                                    | Comments - Database Search                                 | Comments - Database Search       | Function                              |                                    |             |
|--------------|--------------|--------------|-----------------------|-----------------------------------------------------------------------|--------------------------------------------------------|-----------------------------------------------------------------------------------------------------------------------------------------------------------------------|------------------------------------------------------------------------------------------------------------------------------------------------------------------------------------------------------------------------------------|---------------------------------------------------------------------------------------------------------------------------------------------------------------------------------------------------------------------------------------------------------------------------------------------------------------------------------------------------------------------------------------------------------------------------------------------------------------------------------------------------------------------------------------------------------------------------------------------------------------------------------------------|------------------------------------------------------------|----------------------------------|---------------------------------------|------------------------------------|-------------|
| 226          | NEB2         | NEB2_HUMAN   | NEB2                  | Q5RSR3; Q5RCR9                                                        | NP_115984                                              | Neurabin-2 (Neurabin-II) (Spinophilin) (Protein phosphatase 1 regulatory subunit 9B)                                                                                  | GO:000830; GO:000379; GO:0007050; GO:0030154; GO:0030054; GO:0042495; GO:0005856; GO:0030308; GO:0007399; GO:0005654; GO:0004864; GO:0008157; GO:0001654; GO:0041217; GO:0007096; GO:0045202                                       | RNA splicing; actin binding; cell cycle arrest; cell differentiation; cell junction; cell projection; cytoskeleton; negative regulation of cell growth; nervous system development; nucleoplasm; phosphoprotein phosphatase inhibitor activity; protein phosphatase 1 binding; protein phosphatase type 1 complex; regulation of cell growth by extracellular stimulus; regulation of cell proliferation; regulation of exit from mitosis; synapse                                                                                                                                                                                          | Cytoplasm; Nucleus; Cell projection; Junctional Study      | Phosphorylated - from this Study | Known in Uniprot to be phosphorylated | Known in HPRD to be phosphorylated | Phosphatase |
| 227          | IF2P         | IF2P_HUMAN   | IF2P; Q8NSA0          | Q68841; Q59505; Q9UF81; Q9UMM7; Q8NSA0                                | NP_056988                                              | Eukaryotic translation initiation factor 5B (eIF-5B) (Transition initiation factor IF-2); Eukaryotic translation initiation factor 5B                                 | GO:0005225; GO:0003024; GO:0005737; GO:0005515; GO:0006446; GO:0003743                                                                                                                                                             | GTP binding; GTPase activity; cytoplasm; protein binding; regulation of translational initiation; translation initiation factor activity                                                                                                                                                                                                                                                                                                                                                                                                                                                                                                    | Cytoplasm;                                                 | Phosphorylated - from this Study | Known in Uniprot to be phosphorylated | Known in HPRD to be phosphorylated |             |
| 228          | S39A9        | S39A9_HUMAN  | S39A9                 | Q5MQJ0; Q5MQJ0; Q5JH93                                                | XP_937983; NP_060845                                   | Zinc transporter ZIP9 (Zrt- and Irt-like protein 9) (ZIP-9) (Solute carrier family 39 member 9)                                                                       | GO:0005794; GO:0016021; GO:0046873; GO:0005730; GO:0008274; GO:0004211; GO:0006511                                                                                                                                                 | Golgi apparatus; integral to membrane; metal ion transmembrane transporter activity; nucleus; zinc ion binding; zinc ion transport                                                                                                                                                                                                                                                                                                                                                                                                                                                                                                          | Membrane; Multipass membrane protein                       | Phosphorylated - from this Study |                                       |                                    |             |
| 229          | UBP24        | UBP24_HUMAN  | UBP24                 | Q5LPU5; Q62572; Q8H2V4; Q9NXD1                                        | XP_371254; NP_056121                                   | Ubiquitin carboxyl-terminal hydrolase 24 (EC 3.1.2.15) (Ubiquitin thioesterase 24) (Ubiquitin-specific-processing protease 24) (Deubiquitinating enzyme 24)           | GO:0005225; GO:0004211; GO:0006511                                                                                                                                                                                                 | cysteine-type peptidase activity; ubiquitin thioesterase activity; ubiquitin-dependent protein catabolic process                                                                                                                                                                                                                                                                                                                                                                                                                                                                                                                            |                                                            | Phosphorylated - from this Study | Known in Uniprot to be phosphorylated |                                    |             |
| 230          | FRM4B        | FRM4B_HUMAN  | FRM4B                 | Q9Y2L6; Q8TA13                                                        | XP_114303; NP_055938                                   | FERM domain-containing protein 4B (GRP1-binding protein GRSP1)                                                                                                        | GO:0005488; GO:0005737; GO:0005856                                                                                                                                                                                                 | binding; cytoplasm; cytoskeleton                                                                                                                                                                                                                                                                                                                                                                                                                                                                                                                                                                                                            | Cytoplasm; cytoskeleton                                    | Phosphorylated - from this Study | Known in Uniprot to be phosphorylated | Known in HPRD to be phosphorylated |             |
| 231          | NBEL2        | NBEL2_HUMAN  | Q6ZNI1; NBEL2         | Q6ZNI1; Q62885; Q6P994; Q6UX91; Q8MKA9                                | XP_946304; NP_051064; NP_055990                        | Neurobechin-like protein 2                                                                                                                                            | GO:0005488                                                                                                                                                                                                                         | binding                                                                                                                                                                                                                                                                                                                                                                                                                                                                                                                                                                                                                                     |                                                            | Phosphorylated - from this Study | Known in Uniprot to be phosphorylated | Known in HPRD to be phosphorylated |             |
| 232          | Q6NXXB       | Q6NXXB_HUMAN | Q6NXXB                | Q6NXXB                                                                | XP_931621                                              | Ribosomal protein S3A                                                                                                                                                 | GO:0005840; GO:0003735; GO:0006412                                                                                                                                                                                                 | ribosome; structural constituent of ribosome; translation                                                                                                                                                                                                                                                                                                                                                                                                                                                                                                                                                                                   |                                                            | Phosphorylated - from this Study |                                       |                                    |             |
| 233          | PRR3E        | PRR3E_HUMAN  | Q9H711; PRR3E         | Q9H711                                                                | XP_932122                                              | Protein phosphatase 1 regulatory subunit 3E                                                                                                                           | GO:0005977                                                                                                                                                                                                                         | glycogen metabolic process                                                                                                                                                                                                                                                                                                                                                                                                                                                                                                                                                                                                                  |                                                            | Phosphorylated - from this Study |                                       |                                    | Phosphatase |
| 234          | CO4A3        | CO4A3_HUMAN  | CO4A3                 | Q01955; Q35Q01; Q35R14; Q35R8W; Q9S072; Q9NYC4                        | XP_0011319; NP_000882; NP_112730; NP_112733; NP_112734 | Collagen alpha-3(IV) chain (Goodpasture antigen) (Cleaved into: Tumastatin)                                                                                           | GO:0006919; GO:0006915; GO:0007155; GO:0007166; GO:0005887; GO:0005201; GO:0006917; GO:0005178; GO:0008191; GO:0016525; GO:0008285; GO:0007605                                                                                     | activation of caspase activity; blood circulation; cell adhesion; cell surface receptor linked signal transduction; collagen type IV; extracellular matrix structural constituent; induction of apoptosis; integrin binding; metalloproteinase inhibitor activity; negative regulation of angiogenesis; negative regulation of cell proliferation; sensory perception of sound                                                                                                                                                                                                                                                              | Secreted; Extracellular space; Basement membrane           | Phosphorylated - from this Study | Known in Uniprot to be phosphorylated | Known in HPRD to be phosphorylated |             |
| 235          | INF2         | INF2_HUMAN   | Q27811; INF2          | Q9H6N1; Q27811; Q27813; Q69YLB; Q6FXK2; Q6PK22; Q8BTR7; Q9S8H1        | NP_071934; NP_001026                                   | Inverted formin-2 (HBEBP2-binding protein C)                                                                                                                          | GO:0005737; GO:0003739; GO:0003036; GO:0005783; GO:0006534                                                                                                                                                                         | Rho GTPase binding; actin binding; actin cytoskeleton organization; endoplasmic reticulum; nucleus                                                                                                                                                                                                                                                                                                                                                                                                                                                                                                                                          |                                                            | Phosphorylated - from this Study | Known in Uniprot to be phosphorylated |                                    |             |
| 236          | CA062        | CA062_HUMAN  | Q5TIN1; CA062         | Q8NCN9; Q5TIN1; Q5TIN0; Q8N990                                        | NP_689976                                              | Uncharacterized protein C1orf62                                                                                                                                       |                                                                                                                                                                                                                                    |                                                                                                                                                                                                                                                                                                                                                                                                                                                                                                                                                                                                                                             |                                                            | Phosphorylated - from this Study |                                       |                                    |             |
| 237          | RHDF2        | RHDF2_HUMAN  | Q5YQ88; RHDF2         | Q5YQ88; Q9P3F5; AGNEM3; ARK801; Q5L607; Q9H6E9                        | NP_0010054; NP_078875                                  | Rhomboid family member 2 (Rhomboid 5 homolog 2) (Rhomboid veinlet-like protein 5) (Rhomboid veinlet-like protein 5)                                                   | GO:0005789; GO:0016021                                                                                                                                                                                                             | endoplasmic reticulum membrane; integral to membrane                                                                                                                                                                                                                                                                                                                                                                                                                                                                                                                                                                                        | Endoplasmic reticulum membrane; Multipass membrane protein | Phosphorylated - from this Study | Known in Uniprot to be phosphorylated |                                    |             |
| 238          | RHG06        | RHG06_HUMAN  | RHG06                 | Q43182; R3RW00; Q43437; Q9Y1B3; Q9UKR1; Q9UKR2                        | NP_038286; NP_096116; NP_038267                        | Rho GTPase-activating protein 6 (Rho-type GTPase-activating protein RhogAPX-1)                                                                                        | GO:0005100; GO:0007166; GO:0017124; GO:0005070; GO:0005884; GO:0030041; GO:0005737; GO:0051895; GO:0051497; GO:0007596; GO:0005599; GO:0007155; GO:0005057; GO:0016491; GO:0005886; GO:0031093                                     | Rho GTPase activator activity; Rho protein signal transduction; SH3 domain binding; SH3/SH2 adaptor activity; actin filament; actin filament polymerization; cytoplasm; negative regulation of focal adhesion formation; negative regulation of stress fiber formation; regulation of GTPase activity                                                                                                                                                                                                                                                                                                                                       | Cytoplasm                                                  | Phosphorylated - from this Study | Known in Uniprot to be phosphorylated |                                    |             |
| 239          | FAS          | FAS_HUMAN    | FAS                   | F12259; ARK6E8; Q142B5; Q218W5; Q5R346; Q5R347; Q6LPU6; Q8WVQ6        | NP_000121                                              | Coagulation factor V (Activated protein C cofactor) (Procoagelin, labile factor) (Cleaved into: Coagulation factor V heavy chain; Coagulation factor V light chain)   | GO:0016787; GO:0006629; GO:0005764                                                                                                                                                                                                 | blood coagulation; calcium ion binding; cell adhesion; copper ion binding; oxidoreductase activity; plasma membrane; platelet alpha granule lumen                                                                                                                                                                                                                                                                                                                                                                                                                                                                                           | Secreted                                                   | Phosphorylated - from this Study | Known in Uniprot to be phosphorylated | Known in HPRD to be phosphorylated |             |
| 240          | ASAH1        | ASAH1_HUMAN  | ASAH1; NAAA           | Q02083; Q35T72; Q96E22; Q9S8A8                                        | NP_0010358                                             | N-acylethanolamine-hydrolyzing acid amidase (EC 3.5.1.1) (N-acylethanolamine amidohydrolyase-like) (ASAH-like protein) (Acid ceramidase-like protein)                 | GO:0016787; GO:0006629; GO:0005764                                                                                                                                                                                                 | hydrolase activity; lipid metabolic process; lysosome                                                                                                                                                                                                                                                                                                                                                                                                                                                                                                                                                                                       | Lysosome                                                   | Phosphorylated - from this Study |                                       |                                    |             |
| 241          | CE170        | CE170_HUMAN  | CE170                 | Q5S8W9; Q75058; Q5S8W7; Q5S8W8; Q7LGA9; Q86W31; Q9UQ08; Q9UQ09        | NP_0010358; NP_0010358                                 | Centrosomal protein of 170 kDa (Cap170) (KARP-1 binding protein)                                                                                                      | GO:0005737; GO:0005874                                                                                                                                                                                                             | cytoplasm; microtubule                                                                                                                                                                                                                                                                                                                                                                                                                                                                                                                                                                                                                      | Centrosome; centriole; Cytoplasm; cytoskeleton             | Phosphorylated - from this Study | Known in Uniprot to be phosphorylated | Known in HPRD to be phosphorylated |             |
| 242          | TGF11        | TGF11_HUMAN  | Q43294; Q9BWP3; TGF11 | Q9BWP3; Q9Y2V5                                                        | NP_0010359; NP_057011                                  | Transforming growth factor beta-1-induced transcript 1 protein (Hydrogen peroxide-inducible clone 5 protein) (Hic-5) (Androgen receptor-associated protein of 55 kDa) | GO:0070411; GO:0016055; GO:0050681; GO:0030221; GO:0007155; GO:0030054; GO:0005737; GO:0005856; GO:0008285; GO:0039512; GO:0016363; GO:0010718; GO:0045893; GO:0030511; GO:0003713; GO:0006566; GO:0030579; GO:0008270             | 1-SMAD binding; Wnt receptor signaling pathway; androgen receptor signaling pathway; cell adhesion; cell junction; cytoskeleton; negative regulation of cell proliferation; negative regulation of transforming growth factor beta receptor signaling pathway; nuclear matrix; positive regulation of epithelial to mesenchymal transition; positive regulation of transcription, DNA-dependent; positive regulation of transforming growth factor beta receptor signaling pathway; transcription coactivator activity; transcription from RNA polymerase II promoter; ubiquitin-dependent SMAD protein catabolic process; zinc ion binding | Cell junction; focal adhesion; Nucleus; Cytoplasm          | Phosphorylated - from this Study | Known in Uniprot to be phosphorylated |                                    |             |
| 243          | FA65C        | FA65C_HUMAN  | CT175; FA65C          | Q96MK2; Q5QP86; Q9NQ02                                                | NP_543019                                              | Protein FAM65C                                                                                                                                                        |                                                                                                                                                                                                                                    |                                                                                                                                                                                                                                                                                                                                                                                                                                                                                                                                                                                                                                             |                                                            | Phosphorylated - from this Study |                                       |                                    |             |
| 244          | SYTL3        | SYTL3_HUMAN  | Q5U3B9; SYTL3         | Q5U3B9; Q4VX76; Q48614; Q49616                                        | NP_0010099; 91                                         | Synaptotagmin-like protein 3 (Exophilin-6)                                                                                                                            | GO:0017137; GO:0012505; GO:0006886; GO:0016020; GO:0008270                                                                                                                                                                         | Rab GTPase binding; endomembrane system; intracellular protein transport; membrane; zinc ion binding                                                                                                                                                                                                                                                                                                                                                                                                                                                                                                                                        | Intracytoplasmic membrane; Peripheral membrane protein     | Phosphorylated - from this Study |                                       |                                    |             |
| 245          | ARRB1        | ARRB1_HUMAN  | ARRB1; B6V96B         | F49407; B6V96B; Q75625; Q75630; Q39P20; Q98TK8                        | NP_064647; NP_004032                                   | Beta-arrestin-1 (Arrestin beta-1)                                                                                                                                     | GO:0005737; GO:0004857; GO:0005624; GO:0005886; GO:0005515; GO:0005625                                                                                                                                                             | cytoplasm; enzyme inhibitor activity; membrane fraction; plasma membrane; protein binding; soluble fraction                                                                                                                                                                                                                                                                                                                                                                                                                                                                                                                                 |                                                            | Phosphorylated - from this Study | Known in Uniprot to be phosphorylated | Known in HPRD to be phosphorylated |             |
| 246          | ADCY6        | ADCY6_HUMAN  | ADCY6                 | Q43306; Q9HR75                                                        | NP_066193; NP_056085                                   | Adenylyl cyclase type 6 (EC 4.6.1.1) (Adenylyl cyclase type VI) (ATP pyrophosphate-lyase 6) (Adenylyl cyclase 6) (Ca(2+)-inhibitable adenylyl cyclase)                | GO:0004016; GO:0006917; GO:0016021; GO:0007242; GO:0008060; GO:0005794; GO:0005500; GO:0030037; GO:0016020; GO:0051497; GO:0005547; GO:0043089; GO:0051491; GO:0005515; GO:0032312; GO:0051270; GO:0008360; GO:0008270; GO:0005622 | adenylyl cyclase activity; cAMP biosynthetic process; integral to membrane; intracellular signaling cascade; magnesium ion binding; ARF GTPase activator activity; Golgi apparatus; Rho GTPase activator activity; actin filament reorganization during cell cycle; membrane; negative regulation of stress fiber formation; phosphatidylinositol-3,4,5-trisphosphate binding; positive regulation of Cdc42 GTPase activity; positive regulation of filopodium assembly; protein binding; regulation of ARF GTPase activity; regulation of cell motion; regulation of cell shape; zinc ion binding; intracellular                           | Membrane; Multipass membrane protein                       | Phosphorylated - from this Study | Known in Uniprot to be phosphorylated | Known in HPRD to be phosphorylated |             |
| 247          | CEND2        | CEND2_HUMAN  | CEND2; AK3LL7; ARAP1  | Q96P48; A3KLL7; Q94879; Q4LDD5; Q9YF17; Q6M153; Q8WU51; Q9EHP6; Q9L71 | NP_0010352; NP_056057                                  | Arf-GAP2, Rho-GAP domain, ANK repeat and PH domain-containing protein 1 (Centaurin-delta-2) (Cnt-d2); ARAP1b protein                                                  | GO:0005737; GO:0005886; GO:0005515; GO:0032312; GO:0051270; GO:0008360; GO:0008270; GO:0005622                                                                                                                                     | adenylyl cyclase activity; cAMP biosynthetic process; integral to membrane; intracellular signaling cascade; magnesium ion binding; ARF GTPase activator activity; Golgi apparatus; Rho GTPase activator activity; actin filament reorganization during cell cycle; membrane; negative regulation of stress fiber formation; phosphatidylinositol-3,4,5-trisphosphate binding; positive regulation of Cdc42 GTPase activity; positive regulation of filopodium assembly; protein binding; regulation of ARF GTPase activity; regulation of cell motion; regulation of cell shape; zinc ion binding; intracellular                           | Cytoplasm; Golgi apparatus; UGolgi stack; membrane         | Phosphorylated - from this Study | Known in Uniprot to be phosphorylated |                                    |             |
| 248          | TBA2         | TBA2_HUMAN   | TBA2; TBA3C           | Q13748; A6NIQ0; Q5W099; Q6R711; Q96F18                                | NP_524575; NP_005992; NP_525125                        | Tubulin alpha-3C/D chain (Alpha-tubulin 3C/D) (Tubulin alpha-2 chain) (Alpha-tubulin 2)                                                                               | GO:0005225; GO:0003924; GO:0005874; GO:0007018; GO:0005515; GO:0043234; GO:0051298; GO:0005198                                                                                                                                     | GTP binding; GTPase activity; microtubule; microtubule-based movement; protein binding; protein complex; protein polymerization; structural molecule activity                                                                                                                                                                                                                                                                                                                                                                                                                                                                               |                                                            | Phosphorylated - from this Study | Known in Uniprot to be phosphorylated |                                    |             |











| Protein Name | Uniprot Name | Other Names | Uniprot IDs           | Refseq IDs                                                                                                                        | Protein Description | GO ID                                                                                                                                                                                                                                                                                              | GO Terms                                                                                                                                                                                                                                                                                                                                                                  | Subcellular location                                                                                                                                                                                                                                                                                                                                                                                                                                                                     | Comments                                                                                      | Comments - Database Search     | Comments - Database Search            | Function                           |
|--------------|--------------|-------------|-----------------------|-----------------------------------------------------------------------------------------------------------------------------------|---------------------|----------------------------------------------------------------------------------------------------------------------------------------------------------------------------------------------------------------------------------------------------------------------------------------------------|---------------------------------------------------------------------------------------------------------------------------------------------------------------------------------------------------------------------------------------------------------------------------------------------------------------------------------------------------------------------------|------------------------------------------------------------------------------------------------------------------------------------------------------------------------------------------------------------------------------------------------------------------------------------------------------------------------------------------------------------------------------------------------------------------------------------------------------------------------------------------|-----------------------------------------------------------------------------------------------|--------------------------------|---------------------------------------|------------------------------------|
| 330          | CKOS9        | CKOS9_HUMAN | CKOS9                 | Q5NWT0; Q5IAA8; Q8WZ09; Q11535; NP_001137; B2RE21; NP_0011372                                                                     | NP_060377           | UPF0404 protein C11orf59                                                                                                                                                                                                                                                                           | GO:0051301; GO:0008283; GO:0005737; GO:0008074; GO:0008017; GO:0007067; GO:0005525; GO:0003924; GO:0007266; GO:0005737; GO:0005556; GO:0005886; GO:0043123; GO:0004236; GO:0005515; GO:0003014; GO:0000912; GO:0007160; GO:0005634; GO:0007519; GO:0007264; GO:0043149                                                                                                    | cell division; cell proliferation; cytoplasm; microtubule; microtubule binding; mitosis; signal transduction                                                                                                                                                                                                                                                                                                                                                                             | Cytoplasm                                                                                     | Membrane-Fraction - this study | Known in Uniprot to be phosphorylated |                                    |
| 331          | MARE2        | MARE2_HUMAN | MARE2; B2RE21         | NP_055083; NP_001137; B2RE21; NP_0011372                                                                                          | NP_055083           | Microtubule-associated protein RP/EB family member 2 (APC-binding protein EB2) (End-binding protein 2) (EB2)                                                                                                                                                                                       | GO:0051301; GO:0008283; GO:0005737; GO:0008074; GO:0008017; GO:0007067; GO:0005525; GO:0003924; GO:0007266; GO:0005737; GO:0005556; GO:0005886; GO:0043123; GO:0004236; GO:0005515; GO:0003014; GO:0000912; GO:0007160; GO:0005634; GO:0007519; GO:0007264; GO:0043149                                                                                                    | cell division; cell proliferation; cytoplasm; microtubule; microtubule binding; mitosis; signal transduction                                                                                                                                                                                                                                                                                                                                                                             | Cytoplasm                                                                                     | Membrane-Fraction - this study | Known in Uniprot to be phosphorylated |                                    |
| 332          | RHOA         | RHOA_HUMAN  | RHOA; Q5U024; Q9BVT0  | P61586; Q5U024; P08749; Q9UE14; Q9BVT0                                                                                            | NP_001655           | Transforming protein RhoA (H12); ARHA protein (Fragment)                                                                                                                                                                                                                                           | GO:0005525; GO:0003924; GO:0007266; GO:0005737; GO:0005556; GO:0005886; GO:0043123; GO:0004236; GO:0005515; GO:0003014; GO:0000912; GO:0007160; GO:0005634; GO:0007519; GO:0007264; GO:0043149                                                                                                                                                                            | GTP binding; GTPase activity; Rho protein signal transduction; cytoplasm; cytoskeleton; magnesium ion binding; plasma membrane; positive regulation of I-kappaB kinase/NF-kappaB cascade; positive regulation of NF-kappaB import into nucleus; protein binding; cell differentiation; cell morphogenesis; cell-matrix adhesion; negative regulation of neuron apoptosis; nucleus; skeletal muscle tissue development; small GTPase mediated signal transduction; stress fiber formation | CellmembraneLipidanc horCytoplasmicsideCyt oplasmcytoskeleton;                                | Membrane-Fraction - this study | Known in HPRD to be phosphorylated    |                                    |
| 333          | PPIA         | PPIA_HUMAN  | PPIA; ABK220; B5MD27  | P62937; Q3KQW3; P03022; Q6IBU5; XP_0011303; Q9BXJ3; XP_060398; Q9BY9Y; XP_067503; Q9UC51; XP_293007; B5MD27; XP_067176; XP_116396 | NP_066953           | Peptidyl-prolyl cis-trans isomerase A (PPIase A) (Rotamase A) (EC 5.2.1.8) (Cyclophilin A) (Cyclosporin A-binding protein)                                                                                                                                                                         | GO:0005829; GO:0005576; GO:0019059; GO:0044419; GO:0005534; GO:0004277; GO:0003755; GO:0006457; GO:0019047; GO:0045069; GO:0051082; GO:0001004; GO:0007265; GO:0009755; GO:0007013; GO:0004871                                                                                                                                                                            | cytosol; extracellular region; initiation of viral infection; interspecies interaction between organisms; nucleus; peptide binding; peptidyl-prolyl cis-trans isomerase activity; protein folding; protein integration; regulation of viral genome replication; unfolded protein binding; viron binding                                                                                                                                                                                  | Cytoplasm                                                                                     | Membrane-Fraction - this study | Known in Uniprot to be phosphorylated |                                    |
| 334          | GBB1         | GBB1_HUMAN  | GBB1; Q5QPR5          | P62873; Q5QPR5; B1AZ77; P04697                                                                                                    | NP_002065           | Guanine nucleotide-binding protein G(L)(G(S))(G(T) subunit beta-1) (Transducin beta chain 1)                                                                                                                                                                                                       | GO:0003782; GO:0005945; GO:0005524; GO:0006096; GO:0000287; GO:0005515                                                                                                                                                                                                                                                                                                    | GTPase activity; Ras protein signal transduction; hormone-mediated signaling; muscarinic acetylcholine receptor signaling pathway; signal transducer activity                                                                                                                                                                                                                                                                                                                            |                                                                                               | Membrane-Fraction - this study |                                       |                                    |
| 335          | K6PP         | K6PP_HUMAN  | K6PP; Q5VSR8          | Q94901; Q01813; Q95R88                                                                                                            | NP_002618           | 6-phosphofructokinase type C (EC 2.7.1.11) (Phosphofructokinase 1) (Phosphohexokinase) (Phosphofructo-1-kinase isozyme C) (PFK-C) (6-phosphofructokinase, platelet type) (Phosphofructokinase, platelet (cDNA FLJ78683, highly similar to Homo sapiens phosphofructokinase, platelet (FKFP), mRNA) | GO:0003782; GO:0005945; GO:0005524; GO:0006096; GO:0000287; GO:0005515                                                                                                                                                                                                                                                                                                    | 6-phosphofructokinase activity; 6-phosphofructokinase complex; ATP binding; glycolysis; magnesium ion binding; protein binding                                                                                                                                                                                                                                                                                                                                                           |                                                                                               | Membrane-Fraction - this study | Known in Uniprot to be phosphorylated | Known in HPRD to be phosphorylated |
| 336          | WASF2        | WASF2_HUMAN | WASF2; Q8NB0U         | Q9Y6W5; Q9YD77; Q8NB0U                                                                                                            | NP_008921           | Wiskott-Aldrich syndrome protein family member 2 (WASP family protein member 2) (Protein WAVE-2) (Ves-protein homology domain-containing protein 2); cDNA FLJ9750 fs, clone PLACE2000118, weakly similar to WISKOTT-ALDRICH SYNDROME PROTEIN HOMOLOG                                               | GO:0007188; GO:0003779; GO:0015639; GO:0030036; GO:0005737; GO:0003027; GO:0004969; GO:0016021; GO:0031902; GO:0005515                                                                                                                                                                                                                                                    | G-protein signaling, coupled to cAMP nucleotide second messenger; actin binding; actin cytoskeleton; actin; cytoskeleton organization; cytoplasm; lamellipodium; G-protein coupled receptor protein signaling pathway; histamine receptor activity; integral to membrane                                                                                                                                                                                                                 | Cytoplasmcytoskeleton Cellproliferationlamellipodium;                                         | Membrane-Fraction - this study | Known in Uniprot to be phosphorylated |                                    |
| 337          | MK111        | MK111_HUMAN | MK111; MPK51          | Q0LHJ4; B2K4A4; Q9H364                                                                                                            | NP_068805           | Mitogen-activated protein kinase scaffold protein 1 (interacting protein 1) (MEK-binding partner 1) (Mk1)                                                                                                                                                                                          | GO:0051015; GO:0005509; GO:0005730; GO:0001882; GO:00048471; GO:0051272; GO:0032417; GO:0043234; GO:0042803; GO:0031143; GO:0004981; GO:0004198; GO:0005737; GO:0005886; GO:0008284; GO:0005515; GO:0005524; GO:0003779; GO:0005516; GO:0048739; GO:00048251; GO:00042470; GO:0003774; GO:0030241; GO:0006039; GO:0006941; GO:0003863; GO:0008307; GO:0005769; GO:0008270 | actin filament binding; calcium ion binding; integrin binding; nucleus; nuclear binding; perinuclear region of cytoplasm; positive regulation of cell motion; positive regulation of sodium/hydrogen antiporter activity; protein complex; protein homodimerization activity; pseudopodium; regulation of apoptosis                                                                                                                                                                      | Lateendosomemembrane netherplasmemembrane ProteinCytoplasmicside                              | Membrane-Fraction - this study | Known in Uniprot to be phosphorylated |                                    |
| 338          | ACTN4        | ACTN4_HUMAN | ACTN4                 | Q43707; Q76048                                                                                                                    | NP_004915           | Alpha-actinin-4 (Non-muscle alpha-actinin 4) (F-actin cross-linking protein)                                                                                                                                                                                                                       | GO:0051015; GO:0005509; GO:0005730; GO:0001882; GO:00048471; GO:0051272; GO:0032417; GO:0043234; GO:0042803; GO:0031143; GO:0004981; GO:0004198; GO:0005737; GO:0005886; GO:0008284; GO:0005515; GO:0005524; GO:0003779; GO:0005516; GO:0048739; GO:00048251; GO:00042470; GO:0003774; GO:0030241; GO:0006039; GO:0006941; GO:0003863; GO:0008307; GO:0005769; GO:0008270 | actin filament binding; calcium ion binding; integrin binding; nucleus; nuclear binding; perinuclear region of cytoplasm; positive regulation of cell motion; positive regulation of sodium/hydrogen antiporter activity; protein complex; protein homodimerization activity; pseudopodium; regulation of apoptosis                                                                                                                                                                      | NucleusCytoplasm                                                                              | Membrane-Fraction - this study | Known in Uniprot to be phosphorylated |                                    |
| 339          | CAN1         | CAN1_HUMAN  | CAN1; Q2TTR0          | P07384; Q2TTR0; Q60HW4                                                                                                            | NP_005177           | Calpain-1 catalytic subunit (EC 3.4.22.52) (Calpain 1 large subunit) (Calcium-activated neutral protease 1) (CANP 1) (Calpain mu-type) (muCANP) (Micromolar-calpain) (cell proliferation-inducing gene 30 protein)                                                                                 | GO:0005524; GO:0003779; GO:0005516; GO:00048251; GO:00042470; GO:0003774; GO:0030241; GO:0006039; GO:0006941; GO:0003863; GO:0008307; GO:0005769; GO:0008270                                                                                                                                                                                                              | calcium ion binding; calcium-dependent cysteine-type endopeptidase activity; cytoplasm; plasma membrane; positive regulation of cell proliferation; protein binding; proteolysis                                                                                                                                                                                                                                                                                                         | CytoplasmCellmembrane                                                                         | Membrane-Fraction - this study |                                       |                                    |
| 340          | MYH11        | MYH11_HUMAN | MYH11; Q3MVB8; Q3MNF0 | P35749; Q00396; Q94944; P78422; Q3MVB8; Q3MNF0                                                                                    | NP_002465           | Myosin-11 (Myosin heavy chain 11) (Myosin heavy chain, smooth muscle isoform) (SMHC); Myosin, heavy chain 11, smooth muscle (Myosin, heavy polypeptide 11, smooth muscle, isoform CRA_1); Myosin, heavy chain 11, smooth muscle (Smooth muscle myosin heavy chain isoform SM2)                     | GO:0005524; GO:0003779; GO:0005516; GO:00048251; GO:00042470; GO:0003774; GO:0030241; GO:0006039; GO:0006941; GO:0003863; GO:0008307; GO:0005769; GO:0008270                                                                                                                                                                                                              | ATP binding; actin binding; calmodulin binding; cardiac muscle fiber; cytoskeleton; elastic fiber assembly; melanosome; motor activity; muscle thick filament assembly; smooth muscle contraction; striated muscle contraction; striated muscle thick filament; structural constituent of muscle; myosin complex                                                                                                                                                                         | Melanosome                                                                                    | Membrane-Fraction - this study | Known in Uniprot to be phosphorylated |                                    |
| 341          | LIMS1        | LIMS1_HUMAN | LIMS1                 | P48059; B2K4A4; Q512E5; Q9S844; P52785; Q8WU87; Q9UN82                                                                            | NP_004978           | LIM and senescent cell antigen-like-containing domain protein 1 (Particularly interesting new Cys-His protein 1) (PITCH-1) (Renal carcinoma antigen NY-REN-48)                                                                                                                                     | GO:0005524; GO:0003779; GO:0005516; GO:00048251; GO:00042470; GO:0003774; GO:0030241; GO:0006039; GO:0006941; GO:0003863; GO:0008307; GO:0005769; GO:0008270                                                                                                                                                                                                              | cell aging; cell junction; zinc ion binding                                                                                                                                                                                                                                                                                                                                                                                                                                              | CelljunctionfocaladhesionCellmembranePeripher eralmembranepericyt oplasmicside                | Membrane-Fraction - this study |                                       |                                    |
| 342          | HXK2         | HXK2_HUMAN  | HXK2                  | Q9S844; P52785; Q8WU87; Q9UN82                                                                                                    | NP_000180           | Hexokinase-2 (EC 2.7.1.1) (Hexokinase type II) (HK II) (Muscle form hexokinase)                                                                                                                                                                                                                    | GO:0005524; GO:0003779; GO:0005516; GO:00048251; GO:00042470; GO:0003774; GO:0030241; GO:0006039; GO:0006941; GO:0003863; GO:0008307; GO:0005769; GO:0008270                                                                                                                                                                                                              | ATP binding; cytosol; glycolysis; hexokinase activity; mitochondrial outer membrane                                                                                                                                                                                                                                                                                                                                                                                                      |                                                                                               | Membrane-Fraction - this study | Known in Uniprot to be phosphorylated | Kinase                             |
| 343          | LRBA         | LRBA_HUMAN  | LRBA                  | P50851; Q9H2U3; Q9I2U4                                                                                                            | NP_006717           | Lipopolysaccharide-responsive and beige-like anchor protein (CDC4-like protein) (Beige-like protein)                                                                                                                                                                                               | GO:0004430; GO:0005798; GO:0006661; GO:0046854; GO:0048015; GO:0005515; GO:0003898; GO:0005509; GO:0003774; GO:0030049; GO:0007519; GO:0008307; GO:0016461                                                                                                                                                                                                                | 1-phosphatidylinositol 4-kinase activity; Golgi-associated vesicle; phosphatidylinositol biosynthetic process; phosphoinositide phosphorylation; phosphoinositide-mediated signaling; protein binding; synaptic transmission                                                                                                                                                                                                                                                             |                                                                                               | Membrane-Fraction - this study | Known in Uniprot to be phosphorylated |                                    |
| 344          | PI4KA        | PI4KA_HUMAN | PI4KA; Q4LE69         | P42356; Q72625; Q9JPG2; Q4LE69                                                                                                    | NP_477352           | Phosphatidylinositol 4-kinase alpha (PI4-kinase alpha) (PtdIns-4-kinase alpha) (PI4K-alpha) (EC 2.7.1.67)                                                                                                                                                                                          | GO:0004430; GO:0005798; GO:0006661; GO:0046854; GO:0048015; GO:0005515; GO:0003898; GO:0005509; GO:0003774; GO:0030049; GO:0007519; GO:0008307; GO:0016461                                                                                                                                                                                                                | 1-phosphatidylinositol 4-kinase activity; Golgi-associated vesicle; phosphatidylinositol biosynthetic process; phosphoinositide phosphorylation; phosphoinositide-mediated signaling; protein binding; synaptic transmission                                                                                                                                                                                                                                                             |                                                                                               | Membrane-Fraction - this study | Known in Uniprot to be phosphorylated | Kinase                             |
| 345          | MYL6         | MYL6_HUMAN  | MYL6; Q561V9; Q6IBG5  | P60660; Q16065; P16475; P24572; P24573; Q12780; Q561V9; Q61A20; Q6IPV3                                                            | NP_066299           | Myosin light polypeptide 6 (Smooth muscle and nonmuscle myosin light chain alkali 6) (Myosin light chain alkali 3) (Myosin light chain 3) (MLC-3) (LC17)                                                                                                                                           | GO:0005524; GO:0003779; GO:0005516; GO:00048251; GO:00042470; GO:0003774; GO:0030241; GO:0006039; GO:0006941; GO:0003863; GO:0008307; GO:0005769; GO:0008270                                                                                                                                                                                                              | ATP binding; cytosol; glycolysis; hexokinase activity; mitochondrial outer membrane                                                                                                                                                                                                                                                                                                                                                                                                      |                                                                                               | Membrane-Fraction - this study | Known in Uniprot to be phosphorylated |                                    |
| 346          | MLE1         | MLE1_HUMAN  | MLE1; B2R4T6          | P05976; Q61B05; B2R4T6                                                                                                            | NP_524144           | Myosin light chain 1, skeletal muscle isoform (MLC1P) (A1 catalytic) (Alkali myosin light chain 1)                                                                                                                                                                                                 | GO:0005524; GO:0003779; GO:0005516; GO:00048251; GO:00042470; GO:0003774; GO:0030241; GO:0006039; GO:0006941; GO:0003863; GO:0008307; GO:0005769; GO:0008270                                                                                                                                                                                                              | calcium ion binding; motor activity; muscle filament sliding; muscle myosin complex; muscle organ development; sarcomere; structural constituent of muscle                                                                                                                                                                                                                                                                                                                               |                                                                                               | Membrane-Fraction - this study |                                       |                                    |
| 347          | PGH1         | PGH1_HUMAN  | PGH1; Q5T777          | Q5T777; P23219; Q15122; Q5T776; Q5T778                                                                                            | NP_000953           | Prostaglandin G/H synthase 1 (EC 1.14.99.1) (Cyclooxygenase-1) (COX-1) (Prostaglandin-endoperoxide synthase 1) (Prostaglandin H2 synthase 1) (PGH synthase 1) (PGHS-1) (PHS 1)                                                                                                                     | GO:0005794; GO:0005798; GO:0020037; GO:0005792; GO:0005534; GO:0055114; GO:0016702; GO:0004601; GO:0005886; GO:0001516; GO:0004666; GO:0008217; GO:0006979                                                                                                                                                                                                                | Golgi apparatus; endoplasmic reticulum membrane; heme binding; mitochondrion; nucleus; oxidation reduction; oxidoreductase activity, acting on single donors with incorporation of molecular oxygen, incorporation of two atoms of oxygen; peroxidase activity; plasma membrane; prostaglandin biosynthetic process; prostaglandin-endoperoxide synthase activity; regulation of blood pressure; response to oxidative stress                                                            | MicrosomalmembraneP eripheralmembranePro teinEndoplasmicreticul ummembranePeripher almembrane | Membrane-Fraction - this study |                                       |                                    |
| 348          | ITB1         | ITB1_HUMAN  | ITB1; Q8WUM6          | Q8WUM6; P05566; AK6N22; P78466; P78467; NP_391989; Q13089; Q13090; Q13091; Q13212; Q14622; Q14647; Q39RW2; Q7Z3V1                 | NP_002202           | Integrin beta-1 (Fibronectin receptor subunit beta) (Integrin VLA-4 subunit beta) (CD antigen CD29)                                                                                                                                                                                                | GO:0003018; GO:0009986; GO:0033631; GO:0007160; GO:0006968; GO:0007156; GO:0004280; GO:0008305; GO:0007229; GO:0004419; GO:0007159; GO:00042470; GO:0031594; GO:0046982; GO:0004872; GO:0001726; GO:0042383                                                                                                                                                               | B cell differentiation; cell surface; cell-cell adhesion mediated by integrin; cell-matrix adhesion; cellular defense response; homophilic cell adhesion; identical protein binding; integrin complex; integrin-mediated signaling pathway; interspecies interaction between organisms; leukocyte adhesion; melanosome; neuromuscular junction; protein heterodimerization activity; receptor activity; ruffle; sarcolemma                                                               | CellmembraneSinglepla sttytelmembranepro teinMelanosome                                       | Membrane-Fraction - this study | Known in Uniprot to be phosphorylated |                                    |
| 349          | HPCA         | HPCA_HUMAN  | HPCA; B2R9T3          | P84074; P32074; P41211; P70510; B2R9T3                                                                                            | NP_002134           | Neuron-specific calcium-binding protein hippocampal (Calcium-binding protein BOR-2)                                                                                                                                                                                                                | GO:0003779; GO:0005509                                                                                                                                                                                                                                                                                                                                                    | actin binding; calcium ion binding                                                                                                                                                                                                                                                                                                                                                                                                                                                       |                                                                                               | Membrane-Fraction - this study |                                       |                                    |



| Protein Name | Uniprot Name | Other Names                   | Uniprot Ids                                                                                            | Refseq Ids                      | Protein Description                                                                                                                                                                                                                                                    | GO ID                                                                                                                                                                                                                                                                                                                                                                                                                                                                                                       | GO terms                                                                                                                                                                                                                                                                                                                                          | Subcellular location                                                                                                                              | Comments                       | Comments                              | Comments - Database Search            | Comments - Database Search | Function |
|--------------|--------------|-------------------------------|--------------------------------------------------------------------------------------------------------|---------------------------------|------------------------------------------------------------------------------------------------------------------------------------------------------------------------------------------------------------------------------------------------------------------------|-------------------------------------------------------------------------------------------------------------------------------------------------------------------------------------------------------------------------------------------------------------------------------------------------------------------------------------------------------------------------------------------------------------------------------------------------------------------------------------------------------------|---------------------------------------------------------------------------------------------------------------------------------------------------------------------------------------------------------------------------------------------------------------------------------------------------------------------------------------------------|---------------------------------------------------------------------------------------------------------------------------------------------------|--------------------------------|---------------------------------------|---------------------------------------|----------------------------|----------|
| 371 STOM     | STOM_HUMAN   | STOM; QH1376                  | P27105; Q14087; Q15699; Q21936; Q96FK4; Q91376                                                         | NP_004090; NP_937837            | Erythrocyte band 7 integral membrane protein (Stomatin) (Protein 7.2b); PRO0720                                                                                                                                                                                        | GO:0005856; GO:0005887; GO:0042470; GO:0045121; GO:0005151; GO:0051260; GO:0005896; GO:0005622; GO:0005886; GO:0051056; GO:0005794; GO:0005975; GO:0005783; GO:0033919; GO:0042470; GO:0005515; GO:0005975; GO:0005524; GO:0005515                                                                                                                                                                                                                                                                          | cytoskeleton; integral to plasma membrane; melanosome; membrane raft; protein binding; protein homodimerization;                                                                                                                                                                                                                                  | CellmembranSinglipa ssmembraneprotein;Cyt oplasmicacidCellmemb rane;lipidancher;Cytopl asmicacidMelanosome;                                       | Membrane-Fraction - this study | Known in Uniprot to be phosphorylated | Known in Uniprot to be phosphorylated |                            |          |
| 372 RASA3    | RASA3_HUMAN  | Q8IU72; RASA3                 | Q8IU72; Q8IU73; Q14644; A6NL15                                                                         | NP_031394                       | Ras GTPase-activating protein 3 (GAP1)(P4BP) (Ins P4-binding protein)                                                                                                                                                                                                  | GO:0005896; GO:0005622; GO:0005886; GO:0051056; GO:0005794; GO:0005975; GO:0005783; GO:0033919; GO:0042470; GO:0005515; GO:0005975; GO:0005524; GO:0005515                                                                                                                                                                                                                                                                                                                                                  | GTPase activator activity; intracellular; plasma membrane; regulation of small GTPase mediated signal transduction; zinc ion binding                                                                                                                                                                                                              | Cellmembrane                                                                                                                                      | Membrane-Fraction - this study | Known in Uniprot to be phosphorylated |                                       |                            |          |
| 373 GANAB    | GANAB_HUMAN  | GANAB; Q9BS14                 | Q14697; A6NC20; Q98148; Q8WTS9; Q9R9X0; Q9BS14                                                         | NP_055425; NP_938148; NP_938149 | Neutral alpha-glucosidase AB (EC 3.2.1.84) (Glucosidase II subunit alpha) (Alpha-glucosidase 2); GANAB protein (Fragment)                                                                                                                                              | GO:0005794; GO:0005975; GO:0005783; GO:0033919; GO:0042470; GO:0005515; GO:0005975; GO:0005524; GO:0005515                                                                                                                                                                                                                                                                                                                                                                                                  | Golgi apparatus; carbohydrate metabolic process; endoplasmic reticulum; glucan 1,3-alpha-glucosidase activity; melanosome; protein binding; carbohydrate metabolic process;                                                                                                                                                                       | Endoplasmicreticulum GolgiapparatusMelanosome;                                                                                                    |                                |                                       |                                       |                            |          |
| 374 ATD3A    | ATD3A_HUMAN  | ATD3A                         | Q9NV77; Q5SV23; Q8N275; Q9K650                                                                         | NP_060558                       | ATPase family AAA domain-containing protein 3A                                                                                                                                                                                                                         | GO:0005524; GO:0005515                                                                                                                                                                                                                                                                                                                                                                                                                                                                                      | ATP binding; nucleoside-triphosphatase activity; protein binding                                                                                                                                                                                                                                                                                  |                                                                                                                                                   |                                | Membrane-Fraction - this study        | Known in Uniprot to be phosphorylated |                            |          |
| 375 GNA12    | GNA12_HUMAN  | GNA12; Q6ZQV4; A4D204; B3KX52 | Q03113; A4D204; Q27811; Q86JMB; Q81D71; Q9LUD9; B3KX52; Q6ZQV4                                         | NP_031379                       | Guanine nucleotide-binding protein subunit alpha-12 (G-protein subunit alpha-12) (G alpha-12); (Elastin microfibril interface 4) [Cleared into: Elastin microfibril interface 4] [Cleared into: Platelet glycoprotein Ia*]; 155 kDa platelet multimerin (p-155) [p155] | GO:0007186; GO:0005525; GO:0003934; GO:0007596; GO:0005886; GO:0005515; GO:0004871; GO:0019001                                                                                                                                                                                                                                                                                                                                                                                                              | G-protein coupled receptor protein signaling pathway; GTP binding; GTPase activity; blood coagulation; plasma membrane; protein binding; signal transducer activity; guanyl nucleotide binding                                                                                                                                                    | Membranep lipidanchor;                                                                                                                            | Membrane-Fraction - this study | Known in Uniprot to be phosphorylated |                                       |                            |          |
| 376 MMRN1    | MMRN1_HUMAN  | MMRN1; Q6ZUL9; Q4WSL1         | Q4WSL1; Q13201; Q68278; Q6ZUL9                                                                         | NP_031377                       | Multimerin-1 (Endothelial cell multimerin) (EMLIN 4) (Elastin microfibril interface located protein 4) (Elastin microfibril interface 4) [Cleared into: Platelet glycoprotein Ia*]; 155 kDa platelet multimerin (p-155) [p155]                                         | GO:0007596; GO:0007155; GO:0005576; GO:0005739; GO:0005634                                                                                                                                                                                                                                                                                                                                                                                                                                                  | blood coagulation; cell adhesion; extracellular region; platelet alpha granule lumen                                                                                                                                                                                                                                                              | Secreted                                                                                                                                          | Membrane-Fraction - this study |                                       |                                       |                            |          |
| 377 ERIC1    | ERIC1_HUMAN  | ERIC1                         | Q86K53; Q9P063                                                                                         | XP_291282; NP_997215            | Cytochrome b-c1 complex protein 1                                                                                                                                                                                                                                      | GO:0005739; GO:0005634                                                                                                                                                                                                                                                                                                                                                                                                                                                                                      | mitochondrion; nucleus                                                                                                                                                                                                                                                                                                                            |                                                                                                                                                   |                                |                                       | Known in Uniprot to be phosphorylated |                            |          |
| 378 UQCRI    | UQCRI_HUMAN  | UQCRI; QCR1; B2R7B8           | P13190; Q9DD02; B2R7B8                                                                                 | NP_003356                       | Cytochrome b-c1 complex subunit 1, mitochondrial (Ubiquinol-cytochrome-c reductase complex core protein 2) (Core protein I) (Complex III subunit 1)                                                                                                                    | GO:0009060; GO:0004222; GO:0005515; GO:0006508; GO:0006010; GO:0008121; GO:0003872; GO:0005945; GO:0005524; GO:0006002; GO:0007095; GO:0006096; GO:0042802; GO:0019900; GO:0002087; GO:0051259; GO:0004676; GO:0009749; GO:0005625                                                                                                                                                                                                                                                                          | aerobic respiration; metalloendopeptidase activity; mitochondrial respiratory chain; protein binding; proteolysis; transport; ubiquinol-cytochrome-c reductase activity; zinc ion binding                                                                                                                                                         | Mitochondrioninnermembrane                                                                                                                        | Membrane-Fraction - this study | Known in Uniprot to be phosphorylated |                                       |                            |          |
| 379 K6PL     | K6PL_HUMAN   | K6PL; Q7L2M7                  | P17858; Q98148; Q95H44; Q98B91; Q7L2M7                                                                 | NP_002617                       | 6-phosphofructokinase, liver type (EC 2.7.1.11) (Phosphofructokinase 1) (Phosphofructokinase) (Phosphofructo-1-kinase isozyme B) (PFK-B); PFKB protein (Fragment)                                                                                                      | GO:0003872; GO:0005945; GO:0005524; GO:0006002; GO:0007095; GO:0006096; GO:0042802; GO:0019900; GO:0002087; GO:0051259; GO:0004676; GO:0009749; GO:0005625                                                                                                                                                                                                                                                                                                                                                  | 6-phosphofructokinase activity; 6-phosphofructokinase complex; ATP binding; fructose 6-phosphate metabolic process; fructose-6-phosphate binding; glycolysis; identical protein binding; kinase binding; magnesium ion binding; protein oligomerization; negative regulation of insulin secretion; response to glucose stimulus; soluble fraction |                                                                                                                                                   | Membrane-Fraction - this study | Known in Uniprot to be phosphorylated |                                       | Kinase                     |          |
| 380 UQCRI    | UQCRI_HUMAN  | UQCRI; QCR2; B3KSN4           | P22695; Q98148; B3KSN4                                                                                 | NP_003357                       | Cytochrome b-c1 complex subunit 2, mitochondrial (Ubiquinol-cytochrome-c reductase complex core protein 2) (Core protein II) (Complex III subunit 2)                                                                                                                   | GO:0009060; GO:0002900; GO:0004222; GO:0005515; GO:0005743; GO:0006010; GO:0006119; GO:0005515; GO:0006508; GO:0008121; GO:0003872; GO:0005945; GO:0005524; GO:0006002; GO:0007095; GO:0006096; GO:0042802; GO:0019900; GO:0002087; GO:0051259; GO:0004676; GO:0009749; GO:0005625                                                                                                                                                                                                                          | aerobic respiration; electron transport chain; metalloendopeptidase activity; mitochondrial inner membrane; nucleus; oxidative phosphorylation; protein binding; proteolysis; transport; zinc ion binding                                                                                                                                         | MitochondrioninnermembraneMatrixside                                                                                                              | Membrane-Fraction - this study | Known in Uniprot to be phosphorylated |                                       |                            |          |
| 381 IC07     | IC07_HUMAN   | IC07; Q5HC52; Q6R739          | Q6R739; Q5HC52; P10321; Q78065; Q78083; Q29631; Q29652; Q29867; Q29960; Q29963; Q95603; Q9H131; Q9TQ39 | NP_002108                       | HLA class I histocompatibility antigen, Cw-7 alpha chain (MHC class I antigen Cw7*); Major histocompatibility complex, class I, C (MHC class I antigen); HLA-C protein (Fragment)                                                                                      | GO:0006810; GO:0008121; GO:0002474; GO:0006955; GO:0016021; GO:0008270                                                                                                                                                                                                                                                                                                                                                                                                                                      | MHC class I protein complex; antigen processing and presentation of peptide antigen via MHC class I; immune response; integral to membrane; interspecies interaction between organisms                                                                                                                                                            | MembraneSinglepassy ptelmembraneprotein;                                                                                                          | Membrane-Fraction - this study |                                       |                                       |                            |          |
| 382 ARMET    | ARMET_HUMAN  | ARMET; AK878                  | P55145; Q14C44; Q85667; Q96154; AK878                                                                  | NP_006001                       | Protein ARMET (Mesencephalic astrocyte-derived neurotrophic factor) (MANF) (Arginine-rich protein)                                                                                                                                                                     | GO:0005576; GO:0008083                                                                                                                                                                                                                                                                                                                                                                                                                                                                                      | extracellular region; growth factor activity                                                                                                                                                                                                                                                                                                      | Secreted                                                                                                                                          | Membrane-Fraction - this study | Known in Uniprot to be phosphorylated |                                       |                            |          |
| 383 ADT1     | ADT1_HUMAN   | ADT1                          | P12235                                                                                                 | NP_001142                       | ADP/ATP translocase 1 (Adenine nucleotide translocator 1) (ANT 1) (ADP/ATP carrier protein 1) (Solute carrier family 25 member 4) (ADP/ATP carrier protein, heart/skeletal muscle isoform 1)                                                                           | GO:0015207; GO:0006091; GO:0008887; GO:0044419; GO:0000002; GO:0005743; GO:0005515                                                                                                                                                                                                                                                                                                                                                                                                                          | adenine transmembrane transporter activity; generation of precursor metabolites and energy; integral to plasma membrane; interspecies interaction between organisms; mitochondrial genome maintenance; mitochondrial inner membrane; protein binding                                                                                              | MitochondrioninnermembraneMitoplasmemb raneProtein                                                                                                | Membrane-Fraction - this study | Known in Uniprot to be phosphorylated |                                       |                            |          |
| 384 SCPDH    | SCPDH_HUMAN  | SCPDH                         | Q8NBX0; Q7AR0; Q97363                                                                                  | NP_057086                       | Probable saccharopine dehydrogenase (EC 1.5.1.9)                                                                                                                                                                                                                       | GO:0005488; GO:0055114; GO:0047131                                                                                                                                                                                                                                                                                                                                                                                                                                                                          | binding; oxidation reduction; saccharopine dehydrogenase (NAD+, L-glutamate-formin) activity                                                                                                                                                                                                                                                      |                                                                                                                                                   |                                | Membrane-Fraction - this study        |                                       |                            |          |
| 385 ABL1     | ABL1_HUMAN   | ABL1; Q5W068; Q5TR26          | Q5W068; Q5TR26; P10321; Q78065; Q95060; Q95070; Q95072; Q87B63; Q96581; Q9NXZ9; Q9NY88; Q9T264         | NP_005461; NP_0010127           | Abl interactor 1 (Abelson interactor 1) (Abl-1) (Spectrin SH3 domain-binding protein 1) (Eps8 SH3 domain-binding protein) (Eps8-binding protein) (eSRB1 (Nsp1-binding protein) (Nsp1BP) (Abl-binding protein 4) (ABPB4)                                                | GO:0030054; GO:0008092; GO:0005856; GO:0008029; GO:0005783; GO:0003002; GO:0008267; GO:0005634; GO:0018108; GO:0005625; GO:0045202; GO:0019717; GO:0005524; GO:0005737; GO:0005515                                                                                                                                                                                                                                                                                                                          | cell junction; cytoskeletal protein binding; cytoskeleton; cytosol; endoplasmic reticulum; lamellipodium; negative regulation of cell proliferation; nucleus; peptidyl-tyrosine phosphorylation; soluble fraction; synapse; synaptosome; transmembrane receptor protein tyrosine kinase signaling pathway                                         | CytoplasmNucleusCellp rojectionlamellipodium Cellproctectinlipodiu mCellproctectin;growth coneCelljunctionsnaps esynaptosomeCytoplasmCytoskeleton | Membrane-Fraction - this study | Known in Uniprot to be phosphorylated |                                       |                            |          |
| 386 ACTB     | ACTB_HUMAN   | Q9BYX7; ACTB                  | Q9BYX7; Q562N5                                                                                         | XP_065237; NP_0010174           | Beta-actin-like protein 3 (Kappa-actin)                                                                                                                                                                                                                                | GO:0005524; GO:0005737; GO:0005515                                                                                                                                                                                                                                                                                                                                                                                                                                                                          | ATP binding; cytoplasm; cytoskeleton; protein binding                                                                                                                                                                                                                                                                                             | Cytoplasmcytoskeleton                                                                                                                             |                                |                                       |                                       |                            |          |
| 387 TCGP     | TCGP_HUMAN   | TCGP                          | P49368; Q8CZV1; Q9BR64                                                                                 | NP_010108                       | T-complex protein 1 subunit gamma (TCP-1-gamma) (CCT-gamma) (TRC5)                                                                                                                                                                                                     | GO:0005524; GO:0005737; GO:0005515; GO:0005856; GO:0005634; GO:0005886; GO:0006457; GO:0003076; GO:0005829; GO:0006886; GO:0005515; GO:0008865; GO:0005794; GO:0016246; GO:0016442; GO:0044419; GO:0042470; GO:0004518; GO:0003676; GO:0005634; GO:0006355; GO:0005509; GO:0007155; GO:0008202; GO:0008305; GO:0007209; GO:00031092; GO:0004872                                                                                                                                                             | ATP binding; cytoplasm; cytoskeleton; nucleus; plasma membrane; protein folding; unfolded protein binding                                                                                                                                                                                                                                         | Cytoplasm                                                                                                                                         | Membrane-Fraction - this study | Known in Uniprot to be phosphorylated |                                       |                            |          |
| 388 SPCS1    | SPCS1_HUMAN  | SPCS1                         | Q916A0; B3XNF8; Q9BWW1                                                                                 | NP_054760                       | Signal peptidase complex subunit 1 (EC 3.4.-.-) (Microsomal signal peptidase 12 kDa subunit) (SPase 12 kDa subunit)                                                                                                                                                    | GO:0005509; GO:0008233; GO:0006508; GO:0005787; GO:0006465; GO:0004399; GO:0009897; GO:0005577; GO:0005634; GO:0003108; GO:0031093; GO:0030674; GO:0051236; GO:0005102; GO:0051292; GO:0001592; GO:0005625; GO:0044431; GO:0003013; GO:0003016; GO:0005829; GO:0006886; GO:0006886; GO:0005515; GO:0008865; GO:0005794; GO:0016246; GO:0016442; GO:0044419; GO:0042470; GO:0004518; GO:0003676; GO:0005634; GO:0006355; GO:0005509; GO:0007155; GO:0008202; GO:0008305; GO:0007209; GO:00031092; GO:0004872 | integral to endoplasmic reticulum membrane; microsome; peptidase activity; proteolysis; signal peptidase complex; signal peptide processing                                                                                                                                                                                                       | MicrosomalmembraneM ultipassmembraneProtein                                                                                                       | Membrane-Fraction - this study |                                       |                                       |                            |          |
| 389 FIBB     | FIBB_HUMAN   | FIBB; B2R7G3                  | P02675; Q3K9P2; B2R7G3                                                                                 | NP_005132                       | Fibrinogen beta chain (Cleared into: Fibrinopeptide B)                                                                                                                                                                                                                 | GO:0004399; GO:0009897; GO:0005577; GO:0005634; GO:0003108; GO:0031093; GO:0030674; GO:0051236; GO:0005102; GO:0051292; GO:0001592; GO:0005625; GO:0044431; GO:0003013; GO:0003016; GO:0005829; GO:0006886; GO:0006886; GO:0005515; GO:0008865; GO:0005794; GO:0016246; GO:0016442; GO:0044419; GO:0042470; GO:0004518; GO:0003676; GO:0005634; GO:0006355; GO:0005509; GO:0007155; GO:0008202; GO:0008305; GO:0007209; GO:00031092; GO:0004872                                                             | eukaryotic cell surface binding; external side of plasma membrane; fibrinogen complex; nucleus; platelet activation; platelet alpha granule lumen; protein binding; protein polymerization; receptor binding; response to calcium ion; signal transduction; soluble fraction                                                                      | Secreted                                                                                                                                          | Membrane-Fraction - this study |                                       |                                       |                            |          |
| 390 APLG1    | APLG1_HUMAN  | APLG1; Q81Y97                 | Q43747; Q75709; Q75842; Q91G09; Q91J04; Q81Y97                                                         | NP_001119; NP_001025            | AP-1 complex subunit gamma-1 (Adapter-related protein complex AP-1 subunit gamma-1) (Golgi adaptor HA1/AP1 adaptor subunit gamma-1) (Gamma1-adaptin) (Clathrin assembly protein complex 1 gamma-1 large chain); Adaptor-related protein complex 1, gamma 1 subunit     | GO:0044431; GO:0003013; GO:0003016; GO:0005829; GO:0006886; GO:0006886; GO:0005515; GO:0008865; GO:0005794; GO:0016246; GO:0016442; GO:0044419; GO:0042470; GO:0004518; GO:0003676; GO:0005634; GO:0006355; GO:0005509; GO:0007155; GO:0008202; GO:0008305; GO:0007209; GO:00031092; GO:0004872                                                                                                                                                                                                             | Golgi apparatus part; clathrin adaptor complex; clathrin-coated vesicle; cytosol; endocytosis; intracellular protein transport; protein binding; protein transporter activity; vesicle-mediated transport                                                                                                                                         | GolgiapparatusCytopl asmicvesicleclathrincoat edvesiclemembraneper ipheralmembraneprotei nCytoplasmicacid;                                        | Membrane-Fraction - this study |                                       |                                       |                            |          |
| 391 SND1     | SND1_HUMAN   | SND1                          | Q7KZF4; Q13122; Q96AG0                                                                                 | NP_055205                       | Staphylococcal nuclease domain-containing protein 1 (p100 co-activator) (100 kDa coactivator) (EBNA2 coactivator p100) (Tutor domain-containing protein 1)                                                                                                             | GO:0005794; GO:0016246; GO:0016442; GO:0044419; GO:0042470; GO:0004518; GO:0003676; GO:0005634; GO:0006355; GO:0005509; GO:0007155; GO:0008202; GO:0008305; GO:0007209; GO:00031092; GO:0004872                                                                                                                                                                                                                                                                                                             | Golgi apparatus; RNA interference; RNA-induced silencing complex; interspecies interaction between organisms; melanosome; nuclease activity; nucleic acid binding; nucleus; regulation of transcription; DNA-dependent; transcription cofactor activity                                                                                           | Nucleus                                                                                                                                           | Membrane-Fraction - this study | Known in Uniprot to be phosphorylated |                                       |                            |          |
| 392 ITA2B    | ITA2B_HUMAN  | ITA2B; Q17R67                 | P08514; B2KCY8; Q95366; Q14443; Q17R67                                                                 | NP_000410                       | Integrin alpha-1Ib (Platelet membrane glycoprotein IIb) (CPalpha IIb) (GP1Ib) (CD antigen CD41) [Cleared into: Integrin alpha-1Ib heavy chain; Integrin alpha-1Ib light chain, form 1; Integrin alpha-1Ib light chain, form 2]                                         | GO:0005509; GO:0007155; GO:0008202; GO:0008305; GO:0007209; GO:00031092; GO:0004872                                                                                                                                                                                                                                                                                                                                                                                                                         | calcium ion binding; cell adhesion; identical protein binding; integrin complex; integrin-mediated signaling pathway; platelet alpha granule membrane; receptor activity                                                                                                                                                                          | MembraneSinglepassy ptelmembraneprotein                                                                                                           | Membrane-Fraction - this study |                                       |                                       |                            |          |

| Protein Name | UniProt Name | Other Names           | UniProt                                                                        | Refseq IDs                                                       | Protein Description                                                                                                                                                                                                                                                                                                                                                                                              | GO ID                                                                                                                                                                                                                                                                              | GO terms                                                                                                                                                                                                                                                                                                                                                                                                                                                                                                                                                                         | Subcellular location                                                                                                    | Comments                       | Comments - Database Search            | Comments - Database Search            | Function                              |             |
|--------------|--------------|-----------------------|--------------------------------------------------------------------------------|------------------------------------------------------------------|------------------------------------------------------------------------------------------------------------------------------------------------------------------------------------------------------------------------------------------------------------------------------------------------------------------------------------------------------------------------------------------------------------------|------------------------------------------------------------------------------------------------------------------------------------------------------------------------------------------------------------------------------------------------------------------------------------|----------------------------------------------------------------------------------------------------------------------------------------------------------------------------------------------------------------------------------------------------------------------------------------------------------------------------------------------------------------------------------------------------------------------------------------------------------------------------------------------------------------------------------------------------------------------------------|-------------------------------------------------------------------------------------------------------------------------|--------------------------------|---------------------------------------|---------------------------------------|---------------------------------------|-------------|
| 393 VWF      | VWF_HUMAN    | VWF                   | P04275; Q99806                                                                 | NP_000543                                                        | von Willebrand factor (VWF) [Cleaved into: von Willebrand antigen 2 (von Willebrand antigen II)]                                                                                                                                                                                                                                                                                                                 | GO:0033093; GO:0031589; GO:0051087; GO:0005181; GO:0005783; GO:0001948; GO:0019865; GO:0005178; GO:0005730; GO:0030168; GO:0031091; GO:0002030; GO:0047485; GO:0042803; GO:0051260; GO:0005578                                                                                     | Weibel-Palade body; cell-substrate adhesion; chaperone binding; collagen binding; endoplasmic reticulum; glycoprotein binding; immunoglobulin binding; integrin binding; nucleolus; platelet activation; platelet alpha granule; protease binding; protein N-terminus binding; protein homodimerization activity; protein homooligomerization; proteinaceous extracellular matrix                                                                                                                                                                                                | Secreted;Secreted;extracellular space;extracellular matrix                                                              |                                | Membrane-Fraction - this study        |                                       |                                       |             |
| 394 CD68     | CD68_HUMAN   | CD68; Q53X13          | P34810; Q96873; Q53X13                                                         | NP_001242; NP_001035148                                          | Macrosialin (Gp110) (CD antigen CD68); CD68 antigen (CD68 antigen variant) (cDNA FL175624, highly similar to Homo sapiens CD68 antigen (CD68), mRNA)                                                                                                                                                                                                                                                             | GO:0005768; GO:0016021; GO:0005705; GO:0005624; GO:0005886; GO:0016020                                                                                                                                                                                                             | endosome; integral to membrane; lysosomal membrane; membrane fraction; plasma membrane; membrane                                                                                                                                                                                                                                                                                                                                                                                                                                                                                 | CellmembraneSingleplateletplasmembraneproteinEndosomeintracellular membrane                                             |                                | Membrane-Fraction - this study        |                                       |                                       |             |
| 395 SC22B    | SC22B_HUMAN  | SC22B                 | O75396; A8K1G0                                                                 | NP_004883                                                        | Vesicle-trafficking protein SEC22b (SEC22 vesicle-trafficking protein homolog B) (ERS24) (ERS-24)                                                                                                                                                                                                                                                                                                                | GO:0006888; GO:0033116; GO:0001339; GO:0001399; GO:0001399; GO:0001399; GO:0016021; GO:0042470; GO:0005515; GO:0015031                                                                                                                                                             | ER to Golgi vesicle-mediated transport; ER-Golgi intermediate compartment membrane; Golgi membrane; endoplasmic reticulum membrane; integral to membrane; melanosome; protein binding; protein transport                                                                                                                                                                                                                                                                                                                                                                         | EndoplasmicreticulumGolgiintermediatecompartmentmembraneSingleplateletplasmembraneproteinEndosomeintracellular membrane |                                | Membrane-Fraction - this study        | Known in UniProt to be phosphorylated |                                       |             |
| 396 TMEDA    | TMEDA_HUMAN  | TMEDA; B2R605         | P49755; Q15602; Q16536; Q861C2; Q861C5; B2R605                                 | NP_006818                                                        | Transmembrane emp24 domain-containing protein 10 (21 kDa transmembrane-trafficking protein) (Transmembrane protein Tmp21) (Ttmp-21-1) (p24delta) (S311I1125) (S311I125)                                                                                                                                                                                                                                          | GO:0005793; GO:0001339; GO:0005801; GO:0016021; GO:0042470; GO:0005792; GO:0005515; GO:0015031; GO:0045055; GO:0048199; GO:0042589                                                                                                                                                 | ER-Golgi intermediate compartment; Golgi membrane; cis-Golgi network; integral to membrane; melanosome; microsome; protein binding; protein transport; regulated secretory pathway; vesicle targeting, to, from or within Golgi; zymogen granule membrane                                                                                                                                                                                                                                                                                                                        | Golgiapparatusmembrane                                                                                                  |                                | Membrane-Fraction - this study        |                                       |                                       |             |
| 397 G6PD     | G6PD_HUMAN   | G6PD                  | P11413; Q16000; Q15763; Q8U70; Q8U88; Q8U86; Q86PQ2                            | NP_000393; NP_001035810                                          | Glucose-6-phosphate 1-dehydrogenase (G6PD) (EC 1.1.1.49)                                                                                                                                                                                                                                                                                                                                                         | GO:0005661; GO:0034599; GO:0005813; GO:0006695; GO:0001816; GO:0005829; GO:0043249; GO:0006010; GO:0005536; GO:0004345; GO:0006749; GO:0009898; GO:0042331; GO:0010734; GO:0055114; GO:0009051; GO:0042803; GO:0046390                                                             | NADP or NADPH binding; cellular response to oxidative stress; centrosome; cholesterol biosynthetic process; cytokine production; cytosol; erythrocyte maturation; glucose 6-phosphate utilization; glucose binding; glucose-6-phosphate dehydrogenase activity; glutathione metabolic process; internal side of plasma membrane; intracellular membrane-bounded organelle; negative regulation of protein amino acid glutathionylation; oxidation reduction; pentose-phosphate shunt; oxidative branch; protein homodimerization activity; ribose phosphate biosynthetic process |                                                                                                                         | Membrane-Fraction - this study | Known in UniProt to be phosphorylated |                                       |                                       |             |
| 398 AT2A1    | AT2A1_HUMAN  | AT2A1; Q7Z675; B3K1Y7 | O14983; A8K539; Q14984; B3K1Y7; Q7Z675                                         | NP_004311; NP_775293                                             | Sarcolemmal/endoplasmic reticulum calcium ATPase 1 (SERCA1) (EC 3.6.3.8) (Calcium pump 1) (Calcium-transporting ATPase sarcolemmal reticulum type, fast twitch skeletal muscle isoform) (SR Ca(2+)-ATPase 1) (Endoplasmic reticulum class 1/2 Ca(2+)-ATPase); Putative uncharacterized protein DKFZ77902152                                                                                                      | GO:000524; GO:0006754; GO:0005509; GO:0006816; GO:0005388; GO:0016021; GO:0002087; GO:0031448; GO:0005515; GO:0033017; GO:0016529                                                                                                                                                  | ATP binding; ATP biosynthetic process; calcium ion binding; calcium ion transport; calcium-transporting ATPase activity; integral to membrane; magnesium ion binding; positive regulation of fast-twitch skeletal muscle fiber contraction; protein binding; sarcolemmal reticulum membrane; sarcolemmal reticulum                                                                                                                                                                                                                                                               | EndoplasmicreticulummembraneMultiplasmembraneproteinSarcolemmalreticulummembrane                                        |                                | Membrane-Fraction - this study        | Known in UniProt to be phosphorylated |                                       |             |
| 399 ILVBL    | ILVBL_HUMAN  | Q98WNS; O43341; ILVBL | O43341; Q98WNS; A11070; Q96F08; Q98511; Q9UE82                                 | NP_006835                                                        | Acetolactate synthase-like protein (EC 2.2.1.-) (IlvB-like protein)                                                                                                                                                                                                                                                                                                                                              | GO:0016021; GO:0004987; GO:0030976; GO:0016740                                                                                                                                                                                                                                     | integral to membrane; magnesium ion binding; thiamin pyrophosphate binding; transferase activity                                                                                                                                                                                                                                                                                                                                                                                                                                                                                 | MembraneSingleplasmembraneprotein                                                                                       |                                | Membrane-Fraction - this study        |                                       |                                       |             |
| 400 FYN      | FYN_HUMAN    | FYN; B5B5U7           | P06241; Q9S3A7; Q16248; Q8NSD7; B5B5U7                                         | NP_694592; NP_002028; NP_694593                                  | Proto-oncogene tyrosine-protein kinase Fyn (Euk) (p59-Fyn) (Protoncogene Syn) (SLK)                                                                                                                                                                                                                                                                                                                              | GO:000524; GO:0005822; GO:0006816; GO:0005829; GO:0005768; GO:0007631; GO:0001948; GO:0042802; GO:0044419; GO:0007612; GO:0030145; GO:0002775; GO:0004715; GO:0006468; GO:0007243                                                                                                  | ATP binding; T cell receptor signaling pathway; calcium ion transport; cytosol; endosome; feeding behavior; glycoprotein binding; identical protein binding; interspecies interaction between organisms; learning; manganese ion binding; multicellular organismal development; non-membrane spanning protein tyrosine kinase activity; plasma membrane; protein amino acid phosphorylation; protein kinase cascade                                                                                                                                                              | Cellmembrane                                                                                                            |                                | Membrane-Fraction - this study        | Known in UniProt to be phosphorylated | Kinase                                |             |
| 401 AT2A3    | AT2A3_HUMAN  | AT2A3                 | Q93084; Q69900; Q69901; Q75501; Q75502; Q15115; Q8TEX5; Q8TEX6                 | NP_005164; NP_777613; NP_777614; NP_777615; NP_777617; NP_777618 | Sarcolemmal/endoplasmic reticulum calcium ATPase 3 (SERCA3) (EC 3.6.3.8) (Calcium pump 3) (SR Ca(2+)-ATPase 3)                                                                                                                                                                                                                                                                                                   | GO:000524; GO:0006754; GO:0005509; GO:0006816; GO:0005388; GO:0016021; GO:0002087; GO:0031965; GO:0005515; GO:0006958; GO:0005615; GO:0049887; GO:0006629; GO:0005515                                                                                                              | ATP binding; ATP biosynthetic process; calcium ion binding; calcium ion transport; calcium-transporting ATPase activity; integral to membrane; magnesium ion binding; nuclear membrane; protein binding; sarcolemmal reticulum membrane                                                                                                                                                                                                                                                                                                                                          | NucleusmembraneMultiplasmembraneproteinEndoplasmicreticulummembraneMultiplasmembraneproteinSarcolemmalreticulummembrane |                                | Membrane-Fraction - this study        | Known in UniProt to be phosphorylated |                                       |             |
| 402 CLUS     | CLUS_HUMAN   | CLUS; Q2TU75          | P10909; B289Q1; P11380; P11381; Q2TU75; Q8YK11; Q7Z589                         | NP_001822; NP_976084                                             | Clusterin (Complement-associated protein SP-2) (Complement cytolysis inhibitor) (CLI) (N/A1/Nk2) (Apolipoprotein 3) (Apo-3) (Testosterone-repressed prostate message 2) (TRPM-2) (Ku70-binding protein 1) (Aging-associated gene 4 protein) [Cleaved into: Clusterin beta chain (Apolalpha) (Complement cytolysis inhibitor a chain); Clusterin alpha chain (Apo/beta) (Complement cytolysis inhibitor b chain)] | GO:0007186; GO:0031997; GO:0005939; GO:0005813; GO:0005829; GO:0060315; GO:0005886; GO:0060316; GO:0019904; GO:0032465; GO:0010880; GO:0051592; GO:0005876; GO:0000922; GO:0014132                                                                                                 | G-protein coupled receptor protein signaling pathway; N-terminal myristoylation domain binding; calcium ion binding; centrosome; cytosol; negative regulation of ryanodine-sensitive calcium-release channel activity; plasma membrane; positive regulation of ryanodine-sensitive calcium-release channel activity; protein domain specific binding; regulation of cytokinesis; regulation of release of sequestered calcium ion into cytosol by sarcolemmal reticulum; response to calcium ion; spindle microtubule; spindle pole; ltm binding                                 | Secreted                                                                                                                |                                | Membrane-Fraction - this study        |                                       |                                       |             |
| 403 CALM     | CALM_HUMAN   | CALM; B4D351          | P62158; P02593; P70667; P99014; Q13942; Q53259; Q61379; Q61380; Q96HK3; B4D351 | NP_001734; NP_008819                                             | Calmodulin (CaM)                                                                                                                                                                                                                                                                                                                                                                                                 | GO:0007186; GO:0031997; GO:0005939; GO:0005813; GO:0005829; GO:0060315; GO:0005886; GO:0060316; GO:0019904; GO:0032465; GO:0010880; GO:0051592; GO:0005876; GO:0000922; GO:0014132                                                                                                 | G-protein coupled receptor protein signaling pathway; N-terminal myristoylation domain binding; calcium ion binding; centrosome; cytosol; negative regulation of ryanodine-sensitive calcium-release channel activity; plasma membrane; positive regulation of ryanodine-sensitive calcium-release channel activity; protein domain specific binding; regulation of cytokinesis; regulation of release of sequestered calcium ion into cytosol by sarcolemmal reticulum; response to calcium ion; spindle microtubule; spindle pole; ltm binding                                 | Spindle                                                                                                                 |                                | Membrane-Fraction - this study        | Known in UniProt to be phosphorylated | Kinase                                |             |
| 404 CPNS1    | CPNS1_HUMAN  | CPNS1                 | P04632; A8K0P1; Q8WXT3; Q9SEW0                                                 | NP_001740; NP_001003962                                          | Calpain small subunit 1 (CS1) (Calcium-dependent protease small subunit 1) (Calcium-dependent protease small subunit) (CDPS) (Calpain regulatory subunit) (Calcium-activated neutral protease small subunit) (CAMP small subunit)                                                                                                                                                                                | GO:0005509; GO:0004198; GO:0005737; GO:0005634; GO:0005886; GO:0008284; GO:0007049; GO:0051301; GO:0005737; GO:0005977; GO:0005506; GO:0030145; GO:0007655; GO:0008633; GO:0005813; GO:0005829; GO:0019899; GO:0042470; GO:0033708; GO:0005634; GO:0040471; GO:0043085; GO:0019904 | calcium ion binding; calcium-dependent cysteine-type endopeptidase activity; cytoplasm; nucleus; plasma membrane; positive regulation of cell proliferation; protein binding                                                                                                                                                                                                                                                                                                                                                                                                     | CytoplasmCellmembrane                                                                                                   |                                | Membrane-Fraction - this study        |                                       |                                       |             |
| 405 PPIB     | PPIB_HUMAN   | PPIB; B2RSV4          | P37140; Q5U087; Q8F545; B2RSV4                                                 | NP_002700; NP_996759                                             | Serine/threonine-protein phosphatase PPI-beta catalytic subunit (PP-1B) (EC 3.1.3.16)                                                                                                                                                                                                                                                                                                                            | GO:0008284; GO:0007049; GO:0051301; GO:0005737; GO:0005977; GO:0005506; GO:0030145; GO:0007655; GO:0008633; GO:0005813; GO:0005829; GO:0019899; GO:0042470; GO:0033708; GO:0005634; GO:0040471; GO:0043085; GO:0019904                                                             | cell cycle; cell division; cytoplasm; glycolytic metabolic process; iron ion binding; manganese ion binding; protein binding                                                                                                                                                                                                                                                                                                                                                                                                                                                     | Cytoplasm                                                                                                               |                                | Membrane-Fraction - this study        | Known in UniProt to be phosphorylated | Known in UniProt to be phosphorylated | Phosphatase |
| 406 1433B    | 1433B_HUMAN  | 1433B; A8K9K2         | P31946; A8K9K2                                                                 | NP_003395; NP_647539                                             | 14-3-3 protein beta/alpha (Protein kinase C inhibitor protein 1) (KCIP-1) (Protein 1054) [Cleaved into: 14-3-3 protein beta/alpha, N-terminally processed]                                                                                                                                                                                                                                                       | GO:000145; GO:0007655; GO:0008633; GO:0005813; GO:0005829; GO:0019899; GO:0042470; GO:0033708; GO:0005634; GO:0040471; GO:0043085; GO:0019904                                                                                                                                      | Ras protein signal transduction; activation of pro-apoptotic gene products; centrosome; cytosol; enzyme binding; melanosome; negative regulation of protein amino acid dephosphorylation; nucleus; perinuclear region of cytoplasm; positive regulation of catalytic activity; protein domain specific binding                                                                                                                                                                                                                                                                   | CytoplasmMelanosome                                                                                                     |                                | Membrane-Fraction - this study        | Known in UniProt to be phosphorylated | Known in UniProt to be phosphorylated |             |

| Protein Name | Uniprot Name | Other Names            | Uniprot ID                                                                                     | Refseq IDs                                                                      | Protein Description                                                                                                                                                                                                                                                                                                                                                                                                                                 | GO ID                                                                                                                                                                                                                                                                                                                                          | GO terms                                                                                                                                                                                                                                                                                                                                                                                                                                                                                                                                                                                                                                                                                                                                                | Subcellular location                      | Comments                              | Comments - Database Search            | Comments - Database Search            | Function |
|--------------|--------------|------------------------|------------------------------------------------------------------------------------------------|---------------------------------------------------------------------------------|-----------------------------------------------------------------------------------------------------------------------------------------------------------------------------------------------------------------------------------------------------------------------------------------------------------------------------------------------------------------------------------------------------------------------------------------------------|------------------------------------------------------------------------------------------------------------------------------------------------------------------------------------------------------------------------------------------------------------------------------------------------------------------------------------------------|---------------------------------------------------------------------------------------------------------------------------------------------------------------------------------------------------------------------------------------------------------------------------------------------------------------------------------------------------------------------------------------------------------------------------------------------------------------------------------------------------------------------------------------------------------------------------------------------------------------------------------------------------------------------------------------------------------------------------------------------------------|-------------------------------------------|---------------------------------------|---------------------------------------|---------------------------------------|----------|
| 407 CD36     | CD36_HUMAN   | CD36; A4D1B1           | P16671; Q13966; Q16937; Q17077; Q9B2P8; Q9B2C2; Q9B2M2; Q9B2N3; Q9B2N4; Q9B2N5; A4D1B1         | NP_000063; NP_001001; NP_0010015; NP_0011209; NP_001120; NP_001120              | Platelet glycoprotein 4 (Platelet glycoprotein IV) (GPVI) (Glycoprotein IIb) (Leukocyte differentiation antigen CD36) (PAS-4) (PAS-5) (Platelet collagen receptor) (Fatty acid translocase) (FAT) (Thrombospondin receptor) (CD36) (CD36 antigen) (Collagen type I receptor, thrombospondin receptor), isoform CRA_a) (CDNA, FL39339, highly similar to Homo sapiens CD36 antigen (collagen type I receptor, thrombospondin receptor) (CD36), mRNA) | GO:0005794; GO:0007596; GO:0019934; GO:0009986; GO:0030301; GO:0005887; GO:0008289; GO:0006629; GO:0019915; GO:0042159; GO:0043481; GO:0042535; GO:0005041; GO:0005624; GO:0007263; GO:0015911; GO:0031092; GO:0001954; GO:0010744; GO:0007053; GO:0050431; GO:0043277; GO:0007155; GO:0006833; GO:0016020; GO:0004872                         | Golgi apparatus; blood coagulation; cAMP-mediated signaling; cell surface; cholesterol transport; integral to plasma membrane; lipid binding; lipid metabolic process; lipid storage; lipoprotein catabolic process; lipoprotein particle clearance; lipoprotein transport; low-density lipoprotein receptor activity; membrane fraction; nitric oxide mediated signal transduction; plasma membrane long-chain fatty acid transport; platelet alpha granule membrane; positive regulation of cell-matrix adhesion; positive regulation of foam cell differentiation; thrombospondin receptor activity; transforming growth factor beta binding; apoptotic cell clearance; cell adhesion; high-density lipoprotein binding; membrane; receptor activity | Membrane; Multipass membrane protein;     | Membrane-Fraction - this study        | Known in UniProt to be phosphorylated | Known in UniProt to be phosphorylated |          |
| 408 ARPC2    | ARPC2_HUMAN  | ARPC2; Q53R19          | O15144; Q53R19; Q92801; Q9P1D4                                                                 | NP_005722; NP_096061                                                            | Actin-related protein 2/3 complex subunit 2 (Arp2/3 complex 34 kDa subunit) (p34-ARC); cDNA FL175076, highly similar to Homo sapiens actin related protein 2/3 complex, subunit 2, 34kDa (ARPC2), transcript variant 2, mRNA (Actin related protein 2/3 complex, subunit 2, 34kDa, isoform CRA_a) (Putative uncharacterized protein ARPC2)                                                                                                          | GO:0005885; GO:0003779; GO:0009282; GO:0042995; GO:0005577; GO:0030833; GO:0005200; GO:0005925; GO:0047372; GO:0006954; GO:0006629; GO:0004622; GO:0016787                                                                                                                                                                                     | Arp2/3 protein complex; actin binding; cell motility; cell projection; cytoplasm; regulation of actin filament polymerization; structural constituent of cytoskeleton; cytoskeleton; focal adhesion                                                                                                                                                                                                                                                                                                                                                                                                                                                                                                                                                     | Cytoplasm; cytoskeleton; Cell projection; | Membrane-Fraction - this study        |                                       |                                       |          |
| 409 MGLL     | MGLL_HUMAN   | MGLL; Q6IBG9; B3KRC2   | Q6IBG9; Q99885; Q99885; B3KRC2                                                                 | NP_009214; NP_001003                                                            | Monoglyceride lipase (MGL) (EC 3.1.1.23) (Lysophospholipase homolog) (Lysophospholipase-like) (HLK-5); MGLL protein (Monoglyceride lipase, isoform CRA_b) (cDNA, FL196595, Homo sapiens monoglyceride lipase (MGL), mRNA)                                                                                                                                                                                                                           | GO:0005225; GO:0003924; GO:0005829; GO:0004576; GO:0005886; GO:0003779; GO:0005931; GO:0005856                                                                                                                                                                                                                                                 | acylglycerol lipase activity; inflammatory response; lipid metabolic process; lysophospholipase activity; hydrolyase activity                                                                                                                                                                                                                                                                                                                                                                                                                                                                                                                                                                                                                           |                                           | Membrane-Fraction - this study        |                                       |                                       |          |
| 410 RAP1A    | RAP1A_HUMAN  | RAP1A; Q5QPH6; ABKAH9  | Q5QPH6; P10113; ABKAH9                                                                         | NP_002875; NP_001010                                                            | Ras-related protein Rap-1A (GTP-binding protein smg-p21A) (Ras-related protein Krev-1) (C21KG) (G-22K)                                                                                                                                                                                                                                                                                                                                              | GO:0005225; GO:0003924; GO:0005829; GO:0004576; GO:0005886; GO:0003779; GO:0005931; GO:0005856                                                                                                                                                                                                                                                 | GTP binding; GTPase activity; cytosol; negative regulation of cell cycle; plasma membrane; small GTPase mediated signal transduction                                                                                                                                                                                                                                                                                                                                                                                                                                                                                                                                                                                                                    | Cell membrane; lipid; hor                 | Membrane-Fraction - this study        |                                       | Known in UniProt to be phosphorylated |          |
| 411 COR1B    | COR1B_HUMAN  | COR1B; B2RD45          | Q08076; B2RD45                                                                                 | NP_065174; NP_001018                                                            | Coronin-1B (Coronin-2)                                                                                                                                                                                                                                                                                                                                                                                                                              | GO:0003779; GO:0005931; GO:0005856                                                                                                                                                                                                                                                                                                             | actin binding; cytoplasm; cytoskeleton                                                                                                                                                                                                                                                                                                                                                                                                                                                                                                                                                                                                                                                                                                                  | Cytoplasm; cytoskeleton                   | Membrane-Fraction - this study        | Known in UniProt to be phosphorylated | Known in UniProt to be phosphorylated |          |
| 412 ARF1     | ARF1_HUMAN   | ARF1                   | P84077; P10947; P32889                                                                         | NP_001649; NP_001019                                                            | ADP-ribosylation factor 1                                                                                                                                                                                                                                                                                                                                                                                                                           | GO:0048205; GO:0005225; GO:0003924; GO:0003924; GO:0001939; GO:0005829; GO:0005886; GO:0005515; GO:0015031; GO:0005057; GO:0006090; GO:0005509; GO:0043499; GO:0009897; GO:0005577; GO:0030168; GO:0031093; GO:0030674; GO:0051258; GO:0001402; GO:0051592; GO:0006020; GO:0016021; GO:0005829; GO:0005741; GO:0000166; GO:0005515; GO:0008308 | COPII coating of Golgi vesicle; GTP binding; GTPase activity; Golgi membrane; cytosol; plasma membrane; protein binding; protein transport; receptor signaling protein activity; retrograde vesicle-mediated transport, Golgi to ER; small GTPase mediated signal transduction                                                                                                                                                                                                                                                                                                                                                                                                                                                                          | Golgi apparatus                           | Membrane-Fraction - this study        | Known in UniProt to be phosphorylated | Known in UniProt to be phosphorylated |          |
| 413 FIBG     | FIBG_HUMAN   | FIBG; Q53Y18           | Q53Y18; P02679; A80527; P04469; P04470; Q9A4L4; Q96KJ3; Q9UC62; Q9UC63                         | NP_000500; NP_068656                                                            | Fibrinogen gamma chain                                                                                                                                                                                                                                                                                                                                                                                                                              | GO:0005225; GO:0003924; GO:0005829; GO:0005886; GO:0003779; GO:0005931; GO:0005856                                                                                                                                                                                                                                                             | calcium ion binding; eukaryotic cell surface binding; external side of plasma membrane; fibrinogen complex; platelet activation; platelet alpha granule lumen; protein binding, bridging; protein polymerization; receptor binding; response to calcium ion; signal transduction                                                                                                                                                                                                                                                                                                                                                                                                                                                                        | Secreted                                  | Membrane-Fraction - this study        |                                       |                                       |          |
| 414 VDAC2    | VDAC2_HUMAN  | VDAC2; A6NLE7          | P45880; Q5VWK1; Q5VWK3; Q61840; Q7L3J5; Q9BWK8; Q9Y3I6; A6NLE7                                 | XP_016625; NP_0011335 2 (VDAC-2) (VDAC2) (Outer mitochondrial membrane porin 2) | Voltage-dependent anion-selective channel protein 2 (VDAC-2) (VDAC2) (Outer mitochondrial membrane porin 2)                                                                                                                                                                                                                                                                                                                                         | GO:0005225; GO:0003924; GO:0005829; GO:0005886; GO:0003779; GO:0005931; GO:0005856                                                                                                                                                                                                                                                             | anion transport; integral to membrane; mitochondrial nucleoid; mitochondrial outer membrane; nucleotide binding; protein binding; voltage-gated anion channel activity                                                                                                                                                                                                                                                                                                                                                                                                                                                                                                                                                                                  | Mitochondrion; outer membrane             |                                       | Known in UniProt to be phosphorylated |                                       |          |
| 415 QSSQY0   | QSSQY0_HUMAN | QSSQY0                 | Q55QY0                                                                                         | XP_000862                                                                       | Novel protein similar to beta-tubulin 4Q (TUBB4Q) (LOC253936) (Tubulin, beta 8, isoform CRA_c)                                                                                                                                                                                                                                                                                                                                                      | GO:0005225; GO:0003924; GO:0005829; GO:0005886; GO:0003779; GO:0005931; GO:0005856                                                                                                                                                                                                                                                             | GTP binding; GTPase activity; cytoplasm; microtubule; microtubule-based movement; protein complex; protein polymerization; structural molecule activity                                                                                                                                                                                                                                                                                                                                                                                                                                                                                                                                                                                                 |                                           |                                       |                                       |                                       |          |
| 416 Q5T8M7   | Q5T8M7_HUMAN | Q5T8M7                 | Q5T8M7                                                                                         | XP_001899                                                                       | Actin, alpha 1, skeletal muscle                                                                                                                                                                                                                                                                                                                                                                                                                     | GO:0005225; GO:0003924; GO:0005829; GO:0005886; GO:0003779; GO:0005931; GO:0005856                                                                                                                                                                                                                                                             | ATP binding; cytoskeleton; protein binding                                                                                                                                                                                                                                                                                                                                                                                                                                                                                                                                                                                                                                                                                                              |                                           |                                       |                                       |                                       |          |
| 417 K1C39    | K1C39_HUMAN  | Q61F06; Q6A163; B2RXK6 | Q61F06; Q6A163; B2RXK6                                                                         | XP_292615; NP_098821; NP_0017226                                                | Keratin, type I cytoskeletal 39 (Cytokeratin-39) (Keratin-39) (CK-39) (Keratin-39) (K39) (Type I hair keratin)                                                                                                                                                                                                                                                                                                                                      | GO:0005225; GO:0003924; GO:0005829; GO:0005886; GO:0003779; GO:0005931; GO:0005856                                                                                                                                                                                                                                                             | intermediate filament; structural molecule activity                                                                                                                                                                                                                                                                                                                                                                                                                                                                                                                                                                                                                                                                                                     |                                           |                                       |                                       |                                       |          |
| 418 Q86WF2   | Q86WF2_HUMAN | Q86WF2                 | Q86WF2                                                                                         | XP_299768                                                                       | Sarcoma antigen NY-SAR-29 (Fragment)                                                                                                                                                                                                                                                                                                                                                                                                                | GO:0003779; GO:0005931; GO:0005856                                                                                                                                                                                                                                                                                                             | RNA binding; multicellular organismal development                                                                                                                                                                                                                                                                                                                                                                                                                                                                                                                                                                                                                                                                                                       |                                           |                                       |                                       |                                       |          |
| 419 BICC1    | BICC1_HUMAN  | BICC1                  | Q9H694                                                                                         | NP_0010739                                                                      | Protein bicaudal C homolog 1 (Bic-C)                                                                                                                                                                                                                                                                                                                                                                                                                | GO:0003779; GO:0005931; GO:0005856                                                                                                                                                                                                                                                                                                             | modification-dependent protein catabolic process; nucleus; protein binding                                                                                                                                                                                                                                                                                                                                                                                                                                                                                                                                                                                                                                                                              | Nucleus                                   |                                       |                                       |                                       |          |
| 420 SPOPL    | SPOPL_HUMAN  | SPOPL                  | Q61Q16                                                                                         | XP_290995                                                                       | Speckle-type POZ protein-like (H1B homolog 2)                                                                                                                                                                                                                                                                                                                                                                                                       | GO:0019941; GO:0005225; GO:0003924; GO:0005829; GO:0005886; GO:0003779; GO:0005931; GO:0005856                                                                                                                                                                                                                                                 | cytoplasm; nucleolus; rRNA (guanine-N1-)-methyltransferase activity; rRNA processing                                                                                                                                                                                                                                                                                                                                                                                                                                                                                                                                                                                                                                                                    | Cytoplasm                                 |                                       |                                       |                                       |          |
| 421 TRMT5    | TRMT5_HUMAN  | TRMT5                  | Q32P41; Q9P2F4                                                                                 | XP_050793; NP_065061                                                            | rRNA (guanine-N1-)-methyltransferase (EC 2.1.1.33) (M1G-C-methyltransferase) (RNA (m6A) methyltransferase) (RNA methyltransferase 5) (TRMT5)                                                                                                                                                                                                                                                                                                        | GO:0005225; GO:0003924; GO:0005829; GO:0005886; GO:0003779; GO:0005931; GO:0005856                                                                                                                                                                                                                                                             | FAD binding; acyl-CoA dehydrogenase activity; electron carrier activity; fatty acid metabolic process; mitochondrial matrix; oxidation reduction; metabolic process                                                                                                                                                                                                                                                                                                                                                                                                                                                                                                                                                                                     | Mitochondrion; matrix;                    |                                       |                                       |                                       |          |
| 422 ACDSB    | ACDSB_HUMAN  | ACDSB; Q5SQN6          | Q49594; Q5SQN6; Q9SCX7                                                                         | NP_001600                                                                       | Short/branched chain specific acyl-CoA dehydrogenase, mitochondrial (SBCAD) (EC 1.1.99.-) (2-methyl branched chain acyl-CoA dehydrogenase) (2-MESCAD) (2-methylbutyryl-CoA dehydrogenase); Acyl-Coenzyme A dehydrogenase, short/branched chain (cDNA, FL394986, Homo sapiens acyl-Coenzyme A dehydrogenase, short/branched chain (ACDSB), nuclear gene encoding mitochondrial protein, mRNA)                                                        | GO:0005225; GO:0003924; GO:0005829; GO:0005886; GO:0003779; GO:0005931; GO:0005856                                                                                                                                                                                                                                                             | 4 iron, 4 sulfur cluster binding; aconitate hydratase activity; citrate metabolic process; iron ion binding; mitochondrial matrix; nucleus; tricarboic acid cycle                                                                                                                                                                                                                                                                                                                                                                                                                                                                                                                                                                                       | Mitochondrion                             |                                       |                                       |                                       |          |
| 423 ACON     | ACON_HUMAN   | ACON; Q5J241; Q8TAQ6   | Q5J241; Q75809; Q8TAQ6                                                                         | NP_001089                                                                       | Aconitate hydratase, mitochondrial (Aconitase) (EC 4.2.1.3) (Citrate hydro-lyase)                                                                                                                                                                                                                                                                                                                                                                   | GO:0005225; GO:0003924; GO:0005829; GO:0005886; GO:0003779; GO:0005931; GO:0005856                                                                                                                                                                                                                                                             | FAD binding; alkylglycerone-phosphate synthase activity; cytosol; lipid biosynthetic process; oxidoreductase activity; peroxisomal membrane                                                                                                                                                                                                                                                                                                                                                                                                                                                                                                                                                                                                             |                                           | Known in UniProt to be phosphorylated |                                       |                                       |          |
| 424 ADAS     | ADAS_HUMAN   | ADAS; ADSB9            | Q00116; Q2TU35; ADSB9                                                                          | NP_003650                                                                       | Alkylglycerone-phosphate synthase, peroxisomal (Alkyl-DHAP synthase) (EC 2.5.1.26) (Alkylglycerone-phosphate synthase) (Aging-associated gene 5 protein)                                                                                                                                                                                                                                                                                            | GO:0005225; GO:0003924; GO:0005829; GO:0005886; GO:0003779; GO:0005931; GO:0005856                                                                                                                                                                                                                                                             | ATP binding; ATP metabolic process; adenylate kinase activity; cytosol; nucleoside kinase activity; nucleus; protein binding; cell cycle arrest; cytoplasm; mitochondrion; plasma membrane                                                                                                                                                                                                                                                                                                                                                                                                                                                                                                                                                              | Cytoplasm;                                |                                       |                                       | Kinase                                |          |
| 425 KAD1     | KAD1_HUMAN   | KAD1; Q6FGX9           | P00568; Q6FGX9; Q9BVK9; Q9JQC7                                                                 | NP_000467                                                                       | Adenylate kinase isoenzyme 1 (AK1) (EC 2.7.4.3) (ATP-AMP transphosphorylase 1) (Myokinase); Adenylate kinase 1 (AK1 protein) (Adenylate kinase 1, isoform CRA_b) (cDNA, FL394359, Homo sapiens adenylate kinase 1 (AK1), mRNA)                                                                                                                                                                                                                      | GO:0005225; GO:0003924; GO:0005829; GO:0005886; GO:0003779; GO:0005931; GO:0005856                                                                                                                                                                                                                                                             | ATP binding; adenylate kinase activity; mitochondrial intermembrane space; nucleoside, nucleoside and nucleic acid metabolic process; nucleoside kinase activity                                                                                                                                                                                                                                                                                                                                                                                                                                                                                                                                                                                        | Mitochondrion; intermembrane space        |                                       |                                       | Kinase                                |          |
| 426 KAD2     | KAD2_HUMAN   | KAD2                   | P54819; AK6L1; B4DH77; B4DL64; Q16856; Q3E854; Q5TIF7; Q8TCY2; Q8TCY3                          | NP_001616                                                                       | Adenylate kinase 2, mitochondrial (AK2) (EC 2.7.4.3) (ATP-AMP transphosphorylase 2)                                                                                                                                                                                                                                                                                                                                                                 | GO:0005225; GO:0003924; GO:0005829; GO:0005886; GO:0003779; GO:0005931; GO:0005856                                                                                                                                                                                                                                                             | DNA binding; antioxidant activity; cellular response to starvation; copper ion binding; drug binding; extracellular space; fatty acid binding; hemolysis by symbiont of host erythrocyte; maintenance of mitochondrion location; negative regulation of apoptosis; platelet alpha granule lumen; protein binding; protein complex; pyridoxal phosphate binding; toxin binding; transport                                                                                                                                                                                                                                                                                                                                                                | Secreted                                  | Known in UniProt to be phosphorylated |                                       |                                       |          |
| 427 ALBU     | ALBU_HUMAN   | ALBU; Q645G4           | P02768; Q645G4; Q95574; P04277; Q13140; Q68DN5; Q6LKK4; Q8QY60; Q9P157; Q9P177; Q9HNS3; Q9UJZ0 | NP_000468                                                                       | Serum albumin                                                                                                                                                                                                                                                                                                                                                                                                                                       | GO:0003677; GO:0003924; GO:0009267; GO:0005507; GO:0008144; GO:0005615; GO:0005504; GO:0019636; GO:0051659; GO:0043066; GO:0031093; GO:0005515; GO:0043234; GO:0015643; GO:0006100                                                                                                                                                             | aldehyde reductase activity; carbohydrate metabolic process; cytosol; electron carrier activity; extracellular space; oxidation reduction; protein binding; response to stress                                                                                                                                                                                                                                                                                                                                                                                                                                                                                                                                                                          | Cytoplasm                                 | Known in UniProt to be phosphorylated |                                       |                                       |          |
| 428 ALDR     | ALDR_HUMAN   | ALDR                   | P15121; Q5U031; Q9BS21; Q9UC19                                                                 | XP_010550; NP_001619                                                            | Aldehyde reductase (AR) (EC 1.1.1.21) (Aldehyde reductase)                                                                                                                                                                                                                                                                                                                                                                                          | GO:0004032; GO:0005975; GO:0005829; GO:0009055; GO:0005615; GO:0051114; GO:0005515; GO:0006950                                                                                                                                                                                                                                                 |                                                                                                                                                                                                                                                                                                                                                                                                                                                                                                                                                                                                                                                                                                                                                         |                                           | Known in UniProt to be phosphorylated |                                       |                                       |          |

| Protein Name | Uniprot Name | Other Names                  | Uniprot ID                                                                                             | Refseq IDs                      | Protein Description                                                                                                                                                                                                                               | GO ID                                                                                                                                                                                                                                                                                                                                                                                                      | GO terms                                                                                                                                                                                                                                                                                                                                                                                                                                                                                                                                                                                                             | Subcellular location                                      | Comments | Comments | Comments - Database Search            | Comments - Database Search         | Function |
|--------------|--------------|------------------------------|--------------------------------------------------------------------------------------------------------|---------------------------------|---------------------------------------------------------------------------------------------------------------------------------------------------------------------------------------------------------------------------------------------------|------------------------------------------------------------------------------------------------------------------------------------------------------------------------------------------------------------------------------------------------------------------------------------------------------------------------------------------------------------------------------------------------------------|----------------------------------------------------------------------------------------------------------------------------------------------------------------------------------------------------------------------------------------------------------------------------------------------------------------------------------------------------------------------------------------------------------------------------------------------------------------------------------------------------------------------------------------------------------------------------------------------------------------------|-----------------------------------------------------------|----------|----------|---------------------------------------|------------------------------------|----------|
| 429 ADT2     | ADT2_HUMAN   | ADT2                         | P15141; Q43350                                                                                         | NP_001143; XP_170195; XP_293027 | ADP/ATP translocase 2 (Adenine nucleotide translocator 2) (ANT 2) (ADP/ATP carrier protein 2) (Solute carrier family 25 member 5) (ADP/ATP carrier protein, fibroblast isoform)                                                                   | GO:0015207; GO:0005488; GO:0005887; GO:0044419; GO:0005743; GO:0042454; GO:0006916; GO:0016323; GO:0005509; GO:0005534; GO:0006928; GO:0007166; GO:0005929; GO:0005133; GO:0005737; GO:0006954; GO:0003026; GO:0006929; GO:0005634; GO:0018149; GO:0019834; GO:0003074; GO:0005102; GO:0005198; GO:0007049; GO:0004859; GO:0005515; GO:0042127; GO:0042383; GO:0007165                                     | adenine transmembrane transporter activity; binding; integral to plasma membrane; interspecies interaction between organisms; mitochondrial inner membrane; mitochondrial nucleoid; transport                                                                                                                                                                                                                                                                                                                                                                                                                        | Mitochondrioninner membraneMultispanningmembrane          |          |          | Known in Uniprot to be phosphorylated |                                    |          |
| 430 ANXA1    | ANXA1_HUMAN  | ANXA1; QSTZ29                | P04083; Q57229                                                                                         | NP_000691                       | Annexin A1 (Annexin-1) (Annexin I) (Lipocortin I) (Calpactin II) (Chromobindin-9) (p35) (Phospholipase A2 inhibitory protein); ANXA1 protein (Annexin A1) (Annexin A1, isoform CRA_a)                                                             | GO:0005151; GO:0016324; GO:0005176; GO:0008013; GO:0007420; GO:0016477; GO:0005913; GO:0043482; GO:0043583; GO:0032401; GO:0008057; GO:0002089; GO:0032438; GO:0005874; GO:0005923                                                                                                                                                                                                                         | transport anti-apoptosis; basolateral plasma membrane; calcium ion binding; calcium-dependent phospholipid binding; cell motion; cell surface receptor linked signal transduction; cilium; cornified envelope; cytoplasm; inflammatory response; keratinocyte differentiation; lipid metabolic process; nucleus; peptide cross-linking; phospholipase A2 inhibitor activity; protein binding; bridging; receptor binding; structural molecule activity; arachidonic acid secretion; cell cycle; phospholipase inhibitor activity; protein binding; regulation of cell proliferation; sarcolemma; signal transduction | NucleusCytoplasmCell junctionCiliumBasolateral membrane   |          |          | Known in Uniprot to be phosphorylated | Known in HPRD to be phosphorylated |          |
| 431 APT      | APT_HUMAN    | APT                          | P07741; Q3K9P5; Q680F9                                                                                 | NP_000476                       | Adenine phosphoribosyltransferase (APRT) (EC 2.4.2.7)                                                                                                                                                                                             | GO:0016208; GO:0003999; GO:0006168; GO:0005829; GO:0005515; GO:0015280; GO:0016324; GO:0005176; GO:0008013; GO:0007420; GO:0016477; GO:0005913; GO:0043482; GO:0043583; GO:0032401; GO:0008057; GO:0002089; GO:0032438; GO:0005874; GO:0005923                                                                                                                                                             | AMP binding; adenine phosphoribosyltransferase activity; adenine salvage; cytosol; protein binding; purine ribonucleoside salvage                                                                                                                                                                                                                                                                                                                                                                                                                                                                                    | Cytoplasm                                                 |          |          |                                       |                                    |          |
| 432 APXL     | APXL_HUMAN   | APXL; SHRM2                  | Q13796                                                                                                 | NP_296859; NP_001640            | Protein Shroom2 (Apical-like protein) (Protein APXL)                                                                                                                                                                                              | GO:0005151; GO:0015280; GO:0016324; GO:0005176; GO:0008013; GO:0007420; GO:0016477; GO:0005913; GO:0043482; GO:0043583; GO:0032401; GO:0008057; GO:0002089; GO:0032438; GO:0005874; GO:0005923                                                                                                                                                                                                             | actin filament binding; amiloride-sensitive sodium channel activity; apical plasma membrane; apical protein localization; beta-catenin binding; brain development; cell migration; cell-cell adherens junction; cellular pigment accumulation; ear development; establishment of melanosome localization; eye pigment granule organization; lens morphogenesis in camera-type eye; melanosome organization; microtubule; tight junction                                                                                                                                                                              | ApicalcellmembraneCell junctiontight junctionCytoskeleton |          |          | Known in Uniprot to be phosphorylated |                                    |          |
| 433 ARF4     | ARF4_HUMAN   | ARF4                         | P18085; B2K777; P21371                                                                                 | NP_001651                       | ADP-ribosylation factor 4                                                                                                                                                                                                                         | GO:0005525; GO:0003924; GO:0005794; GO:0015031; GO:0007264; GO:0003924; GO:0003924; GO:0005794; GO:0015031; GO:0007264; GO:0016132; GO:0005622; GO:0005525; GO:0003924; GO:0005794; GO:0007155; GO:0005938; GO:0006928; GO:0030866; GO:0005768; GO:0005624; GO:0004829; GO:0005886; GO:0030818; GO:0005515; GO:0035020; GO:0001726; GO:0031526; GO:0006915; GO:0005737; GO:0005822; GO:0001889; GO:0007264 | GTP binding; GTPase activity; Golgi apparatus; protein transport; small GTPase mediated signal transduction; vesicle-mediated transport                                                                                                                                                                                                                                                                                                                                                                                                                                                                              | Golgiapparatus                                            |          |          |                                       |                                    |          |
| 434 ARF5     | ARF5_HUMAN   | ARF5; A4D023                 | P84085; P26437; A4D023                                                                                 | NP_001653                       | ADP-ribosylation factor 5; ADP-ribosylation factor 5 (ADP-ribosylation factor 5, isoform CRA_a) (cDNA, FLJ92389, Homo sapiens ADP-ribosylation factor 5 (ARF5), mRNA)                                                                             | GO:0005525; GO:0003924; GO:0005794; GO:0015031; GO:0007264; GO:0016132; GO:0005622; GO:0005525; GO:0003924; GO:0005794; GO:0007155; GO:0005938; GO:0006928; GO:0030866; GO:0005768; GO:0005624; GO:0004829; GO:0005886; GO:0030818; GO:0005515; GO:0035020; GO:0001726; GO:0031526; GO:0006915; GO:0005737; GO:0005822; GO:0001889; GO:0007264                                                             | GTP binding; GTPase activity; Golgi apparatus; protein transport; small GTPase mediated signal transduction; vesicle-mediated transport; cytoplasm; intracellular; plasma membrane                                                                                                                                                                                                                                                                                                                                                                                                                                   | Golgiapparatus;                                           |          |          |                                       |                                    |          |
| 435 ARF6     | ARF6_HUMAN   | ARF6; Q6FG22                 | P62330; Q6FG22; P26438                                                                                 | NP_001654                       | ADP-ribosylation factor 6; ADP-ribosylation factor 6 (ARF6 protein) (cDNA, FLJ94403, Homo sapiens ADP-ribosylation factor 6 (ARF6), mRNA) (Fragment)                                                                                              | GO:0005525; GO:0003924; GO:0005794; GO:0015031; GO:0007264; GO:0016132; GO:0005622; GO:0005525; GO:0003924; GO:0005794; GO:0007155; GO:0005938; GO:0006928; GO:0030866; GO:0005768; GO:0005624; GO:0004829; GO:0005886; GO:0030818; GO:0005515; GO:0035020; GO:0001726; GO:0031526; GO:0006915; GO:0005737; GO:0005822; GO:0001889; GO:0007264                                                             | GTP binding; GTPase activity; Golgi apparatus; cell adhesion; cell cortex; cell motion; cortical actin cytoskeleton organization; endosome; membrane fraction; negative regulation of receptor-mediated endocytosis; plasma membrane; positive regulation of actin filament polymerization; protein binding; protein transport; regulation of Rac protein signal transduction; ruffle; ruffle organization; apoptosis; cytoplasm; intracellular; liver development; small GTPase mediated signal transduction                                                                                                        | Golgiapparatus;                                           |          |          |                                       |                                    |          |
| 436 ARL1     | ARL1_HUMAN   | ARL1; Q5X3B1                 | P40616; Q5X3B1; R80417                                                                                 | NP_001168                       | ADP-ribosylation factor-like protein 1; Putative uncharacterized protein DKFZ66802082 (ADP-ribosylation factor-like 1) (ADP-ribosylation factor-like 1, isoform CRA_b) (cDNA, FLJ92054, Homo sapiens ADP-ribosylation factor-like 1 (ARL1), mRNA) | GO:0005525; GO:0003924; GO:0001399; GO:0008047; GO:0046872; GO:0005515; GO:0007264; GO:0005622                                                                                                                                                                                                                                                                                                             | GTP binding; GTPase activity; Golgi membrane; enzyme activator activity; metal ion binding; protein binding; small GTPase mediated signal transduction; intracellular                                                                                                                                                                                                                                                                                                                                                                                                                                                | Golgiapparatusmembrane                                    |          |          |                                       |                                    |          |
| 437 ANT3     | ANT3_HUMAN   | ANT3; Q5TC78; Q7KZ97; Q8TCE1 | P01008; Q5TC78; B2R6P0; F78439; F78447; Q13815; Q7KZ43; Q7KZ97; Q9UC78; Q8TCE1                         | NP_000479                       | Antithrombin-III (ATIII); SERPINC1 protein                                                                                                                                                                                                        | GO:0007596; GO:0005694; GO:0005829; GO:0005886; GO:0002030; GO:0004867; GO:0005525; GO:0003924; GO:0001399; GO:0008047; GO:0046872; GO:0005515; GO:0007264; GO:0005622                                                                                                                                                                                                                                     | blood coagulation; extracellular region; heparin binding; plasma membrane; protease binding; serine-type endopeptidase inhibitor activity; serine-type endopeptidase inhibitor activity                                                                                                                                                                                                                                                                                                                                                                                                                              | Secretedextracellular space;                              |          |          |                                       |                                    |          |
| 438 BAF      | BAF_HUMAN    | BAF                          | O75531; O60588; Q6GG57                                                                                 | NP_003851; NP_001137            | Barrier-to-autointegration factor 1 (Breakpoint cluster region protein 1) (457)                                                                                                                                                                   | GO:0003677; GO:0005829; GO:0019059; GO:0044419; GO:0005634; GO:0019047; GO:0009615                                                                                                                                                                                                                                                                                                                         | DNA binding; chromosome; cytosol; initiation of viral infection; interspecies interaction between organisms; nucleus; provirus integration; response to virus                                                                                                                                                                                                                                                                                                                                                                                                                                                        | NucleusCytoplasm                                          |          |          | Known in Uniprot to be phosphorylated |                                    |          |
| 439 BLVRB    | BLVRB_HUMAN  | BLVRB                        | P30043; Q33123; A6NKD8; B2K5C6; P32078; P53005                                                         | NP_000704                       | Flavin reductase (FR) (EC 1.5.1.30) (NADPH-dependent diaphorase) (NADPH-flavin reductase) (FLR) (Biliverdin reductase B) (BVR-B) (EC 1.1.1.24) (Biliverdin IX beta-reductase) (Green heme-binding protein) (GHPB)                                 | GO:0004074; GO:0004237; GO:0050662; GO:0005737; GO:0042602; GO:0005514                                                                                                                                                                                                                                                                                                                                     | biliverdin reductase activity; cellular metabolic process; coenzyme binding; cytoplasm; flavin reductase activity; oxidation reduction                                                                                                                                                                                                                                                                                                                                                                                                                                                                               | Cytoplasm                                                 |          |          |                                       |                                    |          |
| 440 BTIA1    | BTIA1_HUMAN  | BTIA1; Q4VANC                | Q13410; Q4VANA; Q9H458                                                                                 | NP_001723                       | Butyrophilin subfamily 1 member A1 (BT); Butyrophilin, subfamily 1, member A1                                                                                                                                                                     | GO:0005576; GO:0005887; GO:0004872; GO:0016021                                                                                                                                                                                                                                                                                                                                                             | extracellular region; integral to plasma membrane; receptor activity; integral to membrane                                                                                                                                                                                                                                                                                                                                                                                                                                                                                                                           | MembraneSinglepassy peptidmembraneprotein5 creted;        |          |          |                                       |                                    |          |
| 441 C1QBP    | C1QBP_HUMAN  | C1QBP                        | Q07021; Q2HKR8; Q9HNV8                                                                                 | NP_001203                       | Complement component 1 Q subcomponent-binding protein, mitochondrial (Glycoprotein c1qbp) (C1qBP) (C1q-i-k protein) (hyaluronan-binding protein 1) (Mitochondrial matrix protein p32) (p33)                                                       | GO:0006955; GO:0044419; GO:0005759; GO:0005886                                                                                                                                                                                                                                                                                                                                                             | immune response; interspecies interaction between organisms; mitochondrial matrix; plasma membrane                                                                                                                                                                                                                                                                                                                                                                                                                                                                                                                   | Mitochondrionmatrix                                       |          |          | Known in Uniprot to be phosphorylated |                                    |          |
| 442 KCC1A    | KCC1A_HUMAN  | KCC1A; B0Y1Y3                | Q14012; Q3K9F6; B0Y1Y3                                                                                 | NP_003647                       | Calcium/calmodulin-dependent protein kinase type 1 (EC 2.7.1.17) (CaM kinase 1) (CaM kinase alpha) (CaMKI) (CaMK-alpha)                                                                                                                           | GO:0005524; GO:0005516; GO:0004683; GO:0030154; GO:0005737; GO:0007399; GO:0006934; GO:0006468; GO:0007165                                                                                                                                                                                                                                                                                                 | ATP binding; calmodulin binding; calmodulin-dependent protein kinase activity; cell differentiation; cytoplasm; nervous system development; nucleus; protein amino acid phosphorylation; signal transduction                                                                                                                                                                                                                                                                                                                                                                                                         | CytoplasmNucleus                                          |          |          | Known in Uniprot to be phosphorylated | Known in HPRD to be phosphorylated |          |
| 443 DHCA     | DHCA_HUMAN   | DHCA; Q3LHW6; CBR1; B2R8Z7   | P18152; Q3LHW6; B2R8Z7                                                                                 | NP_001748                       | Carbonyl reductase (NADPH) 1 (EC 1.1.1.184) (NADPH-dependent carbonyl reductase 1) (Prostaglandin-E(2) 9-reductase) (EC 1.1.1.189) (Prostaglandin 9-ketoreductase) (15-hydroxyprostaglandin dehydrogenase (NADP+)) (EC 1.1.1.197)                 | GO:0004074; GO:0004237; GO:0050662; GO:0005737; GO:0042602; GO:0005514                                                                                                                                                                                                                                                                                                                                     | 15-hydroxyprostaglandin dehydrogenase (NADP+) activity; carbonyl reductase (NADPH) activity; cytoplasm; oxidation reduction; prostaglandin-E2 9-reductase activity; protein binding                                                                                                                                                                                                                                                                                                                                                                                                                                  | Cytoplasm                                                 |          |          | Known in Uniprot to be phosphorylated |                                    |          |
| 444 DHC3     | DHC3_HUMAN   | DHC3; Q6FHP2; CBR3           | O75828; Q6FHP2                                                                                         | NP_001227                       | Carbonyl reductase (NADPH) 3 (EC 1.1.1.184) (NADPH-dependent carbonyl reductase 3)                                                                                                                                                                | GO:0005488; GO:0004090; GO:0005737; GO:0005737; GO:0005634; GO:0045737; GO:0001934; GO:0019901; GO:0006467; GO:00051082                                                                                                                                                                                                                                                                                    | binding; carbonyl reductase (NADPH) activity; cytoplasm; oxidation reduction                                                                                                                                                                                                                                                                                                                                                                                                                                                                                                                                         | Cytoplasm                                                 |          |          |                                       |                                    |          |
| 445 CND3     | CND3_HUMAN   | CND3                         | P30281; B2R063; Q57830; Q96F49                                                                         | XP_301676; NP_0011295           | G1/S-specific cyclin-D3                                                                                                                                                                                                                           | GO:0003037; GO:0005737; GO:0005634; GO:0045737; GO:0001934; GO:0019901; GO:0006467; GO:00051082                                                                                                                                                                                                                                                                                                            | cell division; cyclin-dependent protein kinase holoenzyme complex; cytoplasm; nucleus; positive regulation of cyclin-dependent protein kinase activity; positive regulation of protein amino acid phosphorylation; protein kinase binding                                                                                                                                                                                                                                                                                                                                                                            | CytoplasmNucleus                                          |          |          |                                       |                                    |          |
| 446 TCPZ     | TCPZ_HUMAN   | TCPZ                         | P40227; Q3K9P8; Q7SL94; Q95446                                                                         | NP_001753                       | T-complex protein 1 subunit zeta (TCP-1-zeta) (CCT-zeta) (CCT-zeta-1) (Top20) (HTR3) (Acute morphine dependence-related protein 2)                                                                                                                | GO:0006928; GO:0005737; GO:0006467; GO:00051082                                                                                                                                                                                                                                                                                                                                                            | ATP binding; protein folding; unfolded protein binding                                                                                                                                                                                                                                                                                                                                                                                                                                                                                                                                                               | Cytoplasm                                                 |          |          |                                       |                                    |          |
| 447 SLAF5    | SLAF5_HUMAN  | SLAF5; B2R8T1                | O15430; Q9UJ08; Q95266; Q95660; Q9H9L1; Q6FH48; Q9WLP1; Q9NWB8; Q9UJ04; Q9UJ06; Q9UJ07; Q9UJ17; B2R8T1 | NP_003865                       | SLAM family member 5 (Signaling lymphocytic activation molecule 5) (Leukocyte differentiation antigen CD84) (Cell surface antigen MAX.3) (Hy-9-beta) (CD antigen CD84)                                                                            | GO:0006928; GO:0007166; GO:0005887; GO:0005515; GO:0004872                                                                                                                                                                                                                                                                                                                                                 | defense response; homophilic cell adhesion; integral to plasma membrane; protein binding; receptor activity                                                                                                                                                                                                                                                                                                                                                                                                                                                                                                          | CellmembraneSinglepassy satpeptidmembraneprote in         |          |          | Known in Uniprot to be phosphorylated |                                    |          |









| Protein Name | Uniprot Name | Other Names | Uniprot ID          | Refseq IDs                                     | Protein Description                                                                               | GO ID                                                                                                                                                                                                                                                                                                                                                                                                                                                                                                                                                                              | GO terms                                                                                                                                                                                                                                       | Subcellular location                                                                                                                                                                                                                                                                                                                                                                                                                                                                                                                                                                                                                                                                                                                        | Comments                                                 | Comments - Database Search            | Comments - Database Search         | Function |
|--------------|--------------|-------------|---------------------|------------------------------------------------|---------------------------------------------------------------------------------------------------|------------------------------------------------------------------------------------------------------------------------------------------------------------------------------------------------------------------------------------------------------------------------------------------------------------------------------------------------------------------------------------------------------------------------------------------------------------------------------------------------------------------------------------------------------------------------------------|------------------------------------------------------------------------------------------------------------------------------------------------------------------------------------------------------------------------------------------------|---------------------------------------------------------------------------------------------------------------------------------------------------------------------------------------------------------------------------------------------------------------------------------------------------------------------------------------------------------------------------------------------------------------------------------------------------------------------------------------------------------------------------------------------------------------------------------------------------------------------------------------------------------------------------------------------------------------------------------------------|----------------------------------------------------------|---------------------------------------|------------------------------------|----------|
| 513          | NDU4A        | NDU4A_HUMAN | NDU4A; A4D109       | Q0D483; A4D109; Q6FHNS                         | NP_002480; XP_302059                                                                              | NADH dehydrogenase (ubiquinone) 1 alpha subcomplex subunit 4 (NADH-ubiquinone oxidoreductase MLRQ subunit) (Complex I-MLRQ) (CI-MLRQ)                                                                                                                                                                                                                                                                                                                                                                                                                                              | GO:0008137; GO:0006120; GO:0005747; GO:0006810                                                                                                                                                                                                 | NADH dehydrogenase (ubiquinone) activity; mitochondrial electron transport, NADH to ubiquinone; mitochondrial respiratory chain complex I; transport                                                                                                                                                                                                                                                                                                                                                                                                                                                                                                                                                                                        | Mitochondrioninner membranePeripheral membraneMatrixside |                                       |                                    |          |
| 514          | NDU5A        | NDU5A_HUMAN | NDU5A               | Q43181; Q98569                                 | NP_002486                                                                                         | NADH dehydrogenase (ubiquinone) iron-sulfur protein 4, mitochondrial (NADH-ubiquinone oxidoreductase 18 kDa subunit) (Complex I-18 kDa) (CI-18 kDa) (Complex I-AQDQ) (CI-AQDQ)                                                                                                                                                                                                                                                                                                                                                                                                     | GO:0008137; GO:0007420; GO:0019933; GO:0045333; GO:0006120; GO:0005747; GO:0006800; GO:0048146; GO:0001932; GO:0051591; GO:0006810                                                                                                             | NADH dehydrogenase (ubiquinone) activity; brain development; cAMP-mediated signaling; cellular respiration; mitochondrial electron transport, NADH to ubiquinone; mitochondrial respiratory chain complex I; mitochondrial respiratory chain complex I assembly; oxygen and reactive oxygen species metabolic process; positive regulation of fibroblast proliferation; regulation of protein amino acid phosphorylation; response to cAMP; transport                                                                                                                                                                                                                                                                                       | Mitochondrioninner membranePeripheral membraneMatrixside | Known in Uniprot to be phosphorylated | Known in HPRD to be phosphorylated |          |
| 515          | NID1         | NID1_HUMAN  | NID1                | P14543; Q14942; Q59FL2; Q57AF2; Q57AF3; Q86XD7 | NP_002499                                                                                         | Nidogen-1 (NID-1) (Entactin)                                                                                                                                                                                                                                                                                                                                                                                                                                                                                                                                                       | GO:0005604; GO:0009218; GO:0005509; GO:0007160; GO:0016500; GO:0005515; GO:0008298                                                                                                                                                             | basement membrane; bioluminescence; calcium ion binding; cell-matrix adhesion; membrane fraction; protein-chromophore linkage                                                                                                                                                                                                                                                                                                                                                                                                                                                                                                                                                                                                               | Secretedextracellulars paxeytracellularmatrix            |                                       |                                    |          |
| 516          | NQO2         | NQO2_HUMAN  | NQO2                | P16083; Q57D04                                 | NP_000895                                                                                         | Riboyaldehydicotinamide dehydrogenase (quinone) [EC 1.10.99.2] (NRH dehydrogenase (quinone) 2) (NRH-quinone oxidoreductase 2) (Quinone reductase 2) (QR2)                                                                                                                                                                                                                                                                                                                                                                                                                          | GO:0008753; GO:0009662; GO:0005737; GO:0001512; GO:0009055; GO:0055114; GO:0008270                                                                                                                                                             | NADPH dehydrogenase (quinone) activity; coenzyme binding; cytoplasm; dithionucleotide riboside quinone reductase activity; electron carrier activity; oxidation-reduction; zinc ion binding                                                                                                                                                                                                                                                                                                                                                                                                                                                                                                                                                 | Cytoplasm                                                | Known in Uniprot to be phosphorylated |                                    |          |
| 517          | RASN         | RASN_HUMAN  | RASN; Q5U091        | P01111; Q5U091; Q14971; Q15104; Q15282         | NP_002515                                                                                         | GTPase NRas (Transforming protein N-Ras); Neuroblastoma RAS viral (V-ras) oncogene homolog (Neuroblastoma RAS viral (V-ras) oncogene homolog, isoform CRA_a)                                                                                                                                                                                                                                                                                                                                                                                                                       | GO:0005524; GO:0000139; GO:0005886; GO:0003036; GO:0007569; GO:0006897; GO:0006032; GO:0005624; GO:0043524; GO:0003322; GO:0008284; GO:0005515; GO:0048169; GO:0007264; GO:0051146; GO:0008542                                                 | GTP binding; Golgi membrane; plasma membrane; actin cytoskeleton organization; cell aging; endocytosis; intracellular membrane fraction; negative regulation of neuron apoptosis; positive regulation of Rac protein signal transduction; positive regulation of cell proliferation; protein binding; regulation of long-term neuronal synaptic plasticity; regulation of synaptic transmission; GABAergic; small GTPase mediated signal transduction; striated muscle cell differentiation; visual learning                                                                                                                                                                                                                                | CallicellmembraneLipidanchor                             |                                       |                                    |          |
| 518          | PA1B2        | PA1B2_HUMAN | PA1B2; Q6IBR6       | P68402; Q6IBR6; Q00687; Q29459                 | NP_002563                                                                                         | Platelet-activating factor acetylhydrolase IB subunit beta (EC 3.1.1.47) (PAF acetylhydrolase 30 kDa subunit) (PAF-AH 30 kDa subunit) (PAF-AH subunit beta) (PAFAH subunit beta); Intracellular platelet-activating factor acetylhydrolase alpha 2 subunit (PAFAH1B2 protein) (CDNA FL775836, highly similar to Homo sapiens platelet-activating factor acetylhydrolase, isoform Ib, beta subunit 30kDa (PAFAH1B2), mRNA) (Platelet-activating factor acetylhydrolase IB subunit beta) (Platelet-activating factor acetylhydrolase, isoform Ib, beta subunit 30kDa, isoform CRA_a) | GO:0003847; GO:0005737; GO:0016042; GO:0005737; GO:0016788; GO:0006032; GO:0005515; GO:0007283                                                                                                                                                 | 1-alkyl-2-acetyl-glycerophosphocholine esterase activity; cytoplasm; lipid catabolic process; cytoplasm; hydrolyase activity, acting on ester bonds; lipid metabolic process; protein binding; spermatogenesis                                                                                                                                                                                                                                                                                                                                                                                                                                                                                                                              | Cytoplasm                                                |                                       |                                    |          |
| 519          | PEBP1        | PEBP1_HUMAN | PEBP1; B2R4S1       | P30086; B2R4S1                                 | NP_002558; XP_086916                                                                              | Phosphatidylethanolamine-binding protein 1 (PEBP1) (Prostatic-binding protein) (HCN1pp) (Neuropolyptide h3) (Raf kinase inhibitor protein) (RKIP) [Cleaved into: Hippocampal cholinergic neurotransmitter peptide (HCNP)]                                                                                                                                                                                                                                                                                                                                                          | GO:0005524; GO:0005737; GO:0008429; GO:0005515; GO:0004867                                                                                                                                                                                     | ATP binding; cytoplasm; phosphatidylethanolamine binding; protein binding; serine-type endopeptidase inhibitor activity                                                                                                                                                                                                                                                                                                                                                                                                                                                                                                                                                                                                                     | Cytoplasm                                                | Known in Uniprot to be phosphorylated | Known in HPRD to be phosphorylated |          |
| 520          | PDE6D        | PDE6D_HUMAN | PDE6D; Q6PKG6       | Q43924; Q6IB24; Q43250; Q6PKG8                 | NP_002592                                                                                         | Retinal rod rhodopsin-sensitive cGMP 3',5'-cyclic phosphodiesterase subunit delta (GMP-PDE delta) (Protein p17); PDE6D protein (Phosphodiesterase 6D, cGMP-specific, rod, delta, isoform CRA_b) (Putative uncharacterized protein tmp_locus_12); PDE6D protein                                                                                                                                                                                                                                                                                                                     | GO:0004114; GO:0005515; GO:0050896; GO:0007601                                                                                                                                                                                                 | 3',5'-cyclic-nucleotide phosphodiesterase activity; protein binding; response to stimulus; visual perception;                                                                                                                                                                                                                                                                                                                                                                                                                                                                                                                                                                                                                               |                                                          |                                       |                                    |          |
| 521          | PDPK1        | PDPK1_HUMAN | PDPK1; Q9BRD5       | Q15530; Q6FT20; Q9BRD5; Q81V52                 | NP_002604; NP_112558                                                                              | 3-phosphoinositide-dependent protein kinase 1 (PDK1) [EC 2.7.11.1]; 3-phosphoinositide dependent protein kinase-1                                                                                                                                                                                                                                                                                                                                                                                                                                                                  | GO:0004676; GO:0005824; GO:0030036; GO:0032148; GO:0032869; GO:0005829; GO:0007242; GO:0006469; GO:0018107; GO:0005886; GO:0005515; GO:0007021; GO:0005524; GO:0006468; GO:0004674                                                             | 3-phosphoinositide-dependent protein kinase activity; ATP binding; actin cytoskeleton organization; activation of protein kinase B activity; cellular response to insulin stimulus; cytosol; intracellular signaling cascade; negative regulation of protein kinase activity; peptidyl-threonine phosphorylation; plasma membrane; protein binding; regulation of establishment of protein localization; ATP binding; protein amino acid phosphorylation; protein serine/threonine kinase activity                                                                                                                                                                                                                                          | CytoplasmMembranePeptidyltransferase                     | Known in Uniprot to be phosphorylated | Known in HPRD to be phosphorylated | Kinase   |
| 522          | PEA15        | PEA15_HUMAN | PEA15; Q5W80B       | Q15121; Q5W80B; Q05511; B1AK24                 | NP_003759                                                                                         | Astrocytic phosphoprotein PEA-15 (Phosphoprotein enriched in diabetes) (PED)                                                                                                                                                                                                                                                                                                                                                                                                                                                                                                       | GO:0005916; GO:0005737; GO:0005886; GO:0046325; GO:0005515; GO:0007021; GO:0005524; GO:0006468; GO:0004674                                                                                                                                     | anti-apoptosis; cytoplasm; microtubule associated complex; negative regulation of glucose import; protein binding; sugar/hydrogen symporter activity                                                                                                                                                                                                                                                                                                                                                                                                                                                                                                                                                                                        | Cytoplasm                                                | Known in Uniprot to be phosphorylated | Known in HPRD to be phosphorylated |          |
| 523          | PF4V         | PF4V_HUMAN  | PF4V; A1L450        | P10720; A1L450                                 | NP_002611                                                                                         | Platelet factor 4 variant (PF4var1) (PF4at1) [C-X-C motif chemokine 4 variant] (CXCL4L1) [Cleaved into: Platelet factor 4 variant(4-74); Platelet factor 4 variant(5-74); Platelet factor 4 variant(6-74)]; Platelet factor 4 variant 1                                                                                                                                                                                                                                                                                                                                            | GO:0008009; GO:0005576; GO:0008201; GO:0006955                                                                                                                                                                                                 | chemokine activity; extracellular region; heparin binding; immune response                                                                                                                                                                                                                                                                                                                                                                                                                                                                                                                                                                                                                                                                  | Secreted                                                 |                                       |                                    |          |
| 524          | PGAM1        | PGAM1_HUMAN | PGAM1; Q6FHU2       | P18669; Q6FHU2; Q9BWC0                         | NP_002620                                                                                         | Phosphoglycerate mutase 1 (EC 5.4.2.1) (EC 5.4.2.4) (EC 3.1.3.13) (Phosphoglycerate mutase isozyme B) (PGAM-B) (BPG-dependent PGAM 1); Phosphoglycerate mutase (Fragment)                                                                                                                                                                                                                                                                                                                                                                                                          | GO:0004083; GO:0004082; GO:0005829; GO:0004619; GO:0019901; GO:0006110; GO:0043456; GO:0045730; GO:0006096; GO:0016668                                                                                                                         | bisphosphoglycerate 2-phosphoglycerate activity; bisphosphoglycerate mutase activity; cytosol; phosphoglycerate mutase activity; protein kinase binding; regulation of glycolysis; regulation of pentose-phosphate shunt; respiratory burst; glycolysis; intramolecular transferase activity, phosphotransferases                                                                                                                                                                                                                                                                                                                                                                                                                           |                                                          | Known in Uniprot to be phosphorylated |                                    |          |
| 525          | PHB          | PHB_HUMAN   | PHB; Q13022; ABK401 | P35232; ABK401; Q13022; Q4V9B0                 | NP_002625; XP_069253                                                                              | Prohibitin; Prohibitin (Fragment)                                                                                                                                                                                                                                                                                                                                                                                                                                                                                                                                                  | GO:0002650; GO:0016575; GO:0005887; GO:0005515; GO:0042981; GO:0007165; GO:0016563; GO:0016564; GO:0030036; GO:0008633; GO:0009653; GO:0005886; GO:0005829; GO:0007922; GO:0005874; GO:0005515; GO:0042981; GO:0007165; GO:0016563; GO:0016564 | DNA replication; histone deacetylation; integral to plasma membrane; mitochondrial inner membrane; negative regulation of cell proliferation; negative regulation of transcription; nucleoplasm; protein binding; regulation of apoptosis; signal transduction; transcription activator activity; transcription repressor activity                                                                                                                                                                                                                                                                                                                                                                                                          | Mitochondrioninner membrane;                             | Known in Uniprot to be phosphorylated |                                    |          |
| 526          | DYLL1        | DYLL1_HUMAN | DYLL1; Q6FGH9       | P63167; Q6FGH9; Q15701                         | NP_003737; NP_001032                                                                              | Dynein light chain 1, cytoplasmic (Dynein light chain LCB-type 1) (8 kDa dynein light chain) (DLC8) (Protein inhibitor of neuronal nitric oxide synthase) (PIN); Dynein, light chain, LCB-type 1 (DNCL1 protein) (Dynein, light chain, LCB-type 1, isoform CRA_a) (CDNA, FL29251, Homo sapiens dynein, cytoplasmic, light polypeptide 1 (DNCL1),mRNA)                                                                                                                                                                                                                              | GO:0003036; GO:0008633; GO:0009653; GO:0005886; GO:0005829; GO:0005874; GO:0003777; GO:0007017; GO:0042326; GO:0005886; GO:0005829; GO:0005624; GO:0005875; GO:0008022; GO:0019904                                                             | actin cytoskeleton organization; activation of pro-apoptotic gene products; anatomical structure morphogenesis; cytoplasmic dynein complex; cytosol; female gamete generation; microtubule; microtubule motor activity; microtubule-based process; negative regulation of phosphorylation; plasma membrane; cytosol; membrane fraction; microtubule associated complex; protein C-terminus binding; protein domain specific binding                                                                                                                                                                                                                                                                                                         | Cytoplasm;                                               | known in HPRD to be phosphorylated    |                                    |          |
| 527          | PIP          | PIP_HUMAN   | PIP; A4D211         | P12273; A4D211                                 | NP_002643                                                                                         | Prolactin-inducible protein (Prolactin-induced protein) (Secretory actin-binding protein) (SABP) (Gross cystic disease fluid protein 15) (GCDPF-15) (gp17); Prolactin-induced protein (CDNA, FL392518, Homo sapiens prolactin-induced protein (PIP), mRNA)                                                                                                                                                                                                                                                                                                                         | GO:0003779; GO:0005576; GO:0005576                                                                                                                                                                                                             | actin binding; extracellular region; extracellular region                                                                                                                                                                                                                                                                                                                                                                                                                                                                                                                                                                                                                                                                                   | Secreted;                                                |                                       |                                    |          |
| 528          | PLMN         | PLMN_HUMAN  | PLMN; B2R7F8        | P00747; Q5TEHA; Q15146; Q6PA00; B2R7F8         | NP_000292                                                                                         | Plasminogen [EC 4.21.7.] [Cleaved into: Plasmin heavy chain A; Activation peptide; Angiostatn; Plasmin heavy chain A, short form; Plasmin light chain B]                                                                                                                                                                                                                                                                                                                                                                                                                           | GO:0034185; GO:0005509; GO:0005515; GO:0006917; GO:0016525; GO:0043537; GO:0008285; GO:0051918; GO:0004283; GO:0051919; GO:0006508; GO:0004282; GO:0048771                                                                                     | apoptin binding; calcium ion binding; extracellular space; induction of apoptosis; negative regulation of angiogenesis; negative regulation of blood vessel endothelial cell migration; negative regulation of cell proliferation; negative regulation of fibrinolysis; plasmin activity; positive regulation of fibrinolysis; proteolysis; serine-type endopeptidase activity; tissue remodeling                                                                                                                                                                                                                                                                                                                                           | Secreted                                                 | Known in Uniprot to be phosphorylated | Known in HPRD to be phosphorylated |          |
| 529          | PML          | PML_HUMAN   | PML                 | P29590; P29591; Q00755; Q96541                 | NP_002666; NP_150241; NP_150242; NP_150243; NP_150247; NP_150249; NP_150250; NP_150252; NP_150253 | Probable transcription factor PML (Tripartite motif-1) (RING finger protein 19) (RING finger protein 71)                                                                                                                                                                                                                                                                                                                                                                                                                                                                           | GO:0003677; GO:0006977; GO:0047711; GO:0016605; GO:0033184; GO:0005737; GO:0005626; GO:0044419; GO:0051457; GO:0016525; GO:0030038; GO:0008285; GO:0016481; GO:0005730; GO:0006461; GO:0042863; GO:0006355; GO:0034097; GO:0001666; GO:0008270 | DNA binding; DNA damage response, signal transduction by p53 class mediator resulting in cell cycle arrest; DNA damage response, signal transduction by p53 class mediator resulting in induction of apoptosis; PML body; SUMO polymer binding; cytoplasm; insoluble fraction; interspecies interaction between organisms; maintenance of protein location in nucleus; negative regulation of angiogenesis; negative regulation of cell growth; negative regulation of cell proliferation; negative regulation of transcription; nuclear membrane; nucleolus; protein complex assembly; protein homodimerization activity; regulation of transcription, DNA dependent; response to cytokine stimulus; response to hypoxia; zinc ion binding | Nucleus                                                  | Known in Uniprot to be phosphorylated |                                    |          |

| Protein Name | UniProt Name | Other Names          | UniProt ID                                                                                                                     | Refseq IDs                      | Protein Description                                                                                                                                                                                                                                                                                                                                                                                                                   | GO ID                                                                                                                                                                                                                                                                  | GO terms                                                                                                                                                                                                                                                                                                                                                                                                                                                   | Subcellular location                                                                                                                                                                          | Comments                              | Comments - Database Search | Comments - Database Search | Function                           |
|--------------|--------------|----------------------|--------------------------------------------------------------------------------------------------------------------------------|---------------------------------|---------------------------------------------------------------------------------------------------------------------------------------------------------------------------------------------------------------------------------------------------------------------------------------------------------------------------------------------------------------------------------------------------------------------------------------|------------------------------------------------------------------------------------------------------------------------------------------------------------------------------------------------------------------------------------------------------------------------|------------------------------------------------------------------------------------------------------------------------------------------------------------------------------------------------------------------------------------------------------------------------------------------------------------------------------------------------------------------------------------------------------------------------------------------------------------|-----------------------------------------------------------------------------------------------------------------------------------------------------------------------------------------------|---------------------------------------|----------------------------|----------------------------|------------------------------------|
| 530 RPB2     | RPB2_HUMAN   | RPB2; ABK1A8         | P30876; Q18216; ABK1A8                                                                                                         | NP_000529                       | DNA-directed RNA polymerase II subunit RPB2 (EC 2.7.7.6) (DNA-directed RNA polymerase II subunit B) (RNA polymerase II subunit B2) (RNA polymerase II subunit 2) (DNA-directed RNA polymerase II 140 kDa polypeptide)                                                                                                                                                                                                                 | GO:0003677; GO:0005665; GO:0003899; GO:0003698; GO:0002877; GO:0003098; GO:0005515; GO:0032549; GO:0006367; GO:0008270                                                                                                                                                 | DNA binding; DNA-directed RNA polymerase II, core complex; DNA-directed RNA polymerase activity; RNA elongation from RNA polymerase II promoter; magnesium ion binding; nuclear mRNA splicing, via spliceosome; protein binding; ribonuclease binding; transcription initiation from RNA polymerase II promoter; zinc ion binding                                                                                                                          | Nucleus                                                                                                                                                                                       |                                       |                            |                            |                                    |
| 531 PGPB     | PGPB_HUMAN   | PGPB                 | P10619; B2K798; Q511W6; Q512H1; Q96K22; Q9BR05; Q9BW68                                                                         | NP_000299; NP_001121; 167       | Lysosomal protective protein (EC 3.4.16.5) (Cathepsin A) (Carboxypeptidase C) (Protective protein for beta-galactosidase) (Cleaved into: Lysosomal protective protein 32 kDa chain; Lysosomal protective protein 20 kDa chain)                                                                                                                                                                                                        | GO:0005783; GO:0008047; GO:0006866; GO:0005764; GO:0005515; GO:0006508; GO:0004185                                                                                                                                                                                     | lysosomal proteolysis; enzyme activator activity; intracellular protein transport; lysosome; protein binding; proteolysis; serine-type carboxypeptidase activity                                                                                                                                                                                                                                                                                           | Lysosome                                                                                                                                                                                      |                                       |                            |                            |                                    |
| 532 CANB1    | CANB1_HUMAN  | CANB1; B2RC10        | P63098; Q35SL0; P06705; P15117; Q00044; B2RC10                                                                                 | NP_000936                       | Calcineurin subunit B type 1 (Protein phosphatase 2B regulatory subunit 1) (Protein phosphatase 3 regulatory subunit B alpha isoform 1)                                                                                                                                                                                                                                                                                               | GO:0008633; GO:0005955; GO:0005509; GO:0004723; GO:0005316; GO:0005829                                                                                                                                                                                                 | activation of pro-apoptotic gene products; calcineurin complex; calcium ion binding; calcium-dependent protein serine/threonine phosphatase activity; calmodulin binding; cytosol                                                                                                                                                                                                                                                                          |                                                                                                                                                                                               | Known in UniProt to be phosphorylated |                            | Phosphatase                |                                    |
| 533 KAPCB    | KAPCB_HUMAN  | KAPCB; B2R889        | P22694; B4C201; Q14VH1; Q5AGD0; Q5BNE0; Q5BNF0; Q5BNF1; Q5BNF2; Q5BNF3; Q5CZ92; Q5T1K3; Q7Z3M1; Q81R55; Q81ZQ0; Q98B09; B2R889 | NP_002722; NP_891293; NP_997461 | cAMP-dependent protein kinase catalytic subunit (PKA C-beta) (EC 2.7.11.11)                                                                                                                                                                                                                                                                                                                                                           | GO:0005524; GO:0007188; GO:0004691; GO:0005952; GO:0005737; GO:0009755; GO:0000287; GO:0005634; GO:0006468; GO:0007243                                                                                                                                                 | ATP binding; G-protein signaling, coupled to cAMP nucleotide second messenger; cAMP-dependent protein kinase activity; cAMP-dependent protein kinase complex; cytoplasm; hormone-mediated signaling; magnesium ion binding; nucleus; protein amino acid phosphorylation; protein kinase cascade                                                                                                                                                            | CytoplasmNucleus                                                                                                                                                                              | Known in UniProt to be phosphorylated |                            | Kinase                     |                                    |
| 534 PROS     | PROS_HUMAN   | PROS; ABKAC9         | P07225; Q15518; Q72715; ABKAC9                                                                                                 | NP_000304                       | Vitamin K-dependent protein S                                                                                                                                                                                                                                                                                                                                                                                                         | GO:0007596; GO:0005509; GO:0009373; GO:0004866; GO:0005576; GO:0005576; GO:0007586; GO:0005576; GO:0005515; GO:0006508; GO:0004252                                                                                                                                     | blood coagulation; calcium ion binding; cytoplasm; endopeptidase inhibitor activity; extracellular region; nucleus                                                                                                                                                                                                                                                                                                                                         | Secreted                                                                                                                                                                                      |                                       |                            |                            |                                    |
| 535 TRY1     | TRY1_HUMAN   | TRY1; Q5NV57         | P07477; Q5AV57; A1A509; B2R515; Q7M4N3; Q7M4N4; Q92955; Q9HAN4; Q9HAN5; Q9HAN6; Q9HAN7                                         | NP_002760                       | Trypsin-1 (EC 3.4.21.4) (Trypsin I) (Cationic trypsinogen) (Serine protease 1) (Beta-trypsin) (Cleaved into: Alpha-trypsin chain 1; Alpha-trypsin chain 2)                                                                                                                                                                                                                                                                            | GO:0005576; GO:0007586; GO:0005576; GO:0005515; GO:0006508; GO:0004252                                                                                                                                                                                                 | calcium ion binding; digestion; extracellular region; protein binding; proteolysis; serine-type endopeptidase activity                                                                                                                                                                                                                                                                                                                                     | Secretedextracellular space                                                                                                                                                                   |                                       |                            |                            | known in HPRD to be phosphorylated |
| 536 PSA2     | PSA2_HUMAN   | PSA2; Q61C56         | P25787; Q61C56; Q90U45                                                                                                         | NP_002778                       | Proteasome subunit alpha type-2 (EC 3.4.25.1) (Proteasome component C3) (Macropain subunit C3) (Multicatalytic endopeptidase complex subunit C3)                                                                                                                                                                                                                                                                                      | GO:0031145; GO:0005829; GO:0051436; GO:0005634; GO:0051437; GO:0005839; GO:0005515; GO:0004298                                                                                                                                                                         | anaphase-promoting complex-dependent proteasomal ubiquitin-dependent protein catabolic process; cytosol; negative regulation of ubiquitin-protein ligase activity during mitotic cell cycle; nucleus; positive regulation of ubiquitin-protein ligase activity during mitotic cell cycle; proteasome core complex; protein binding; threonine-type endopeptidase activity                                                                                  | CytoplasmNucleus                                                                                                                                                                              | Known in UniProt to be phosphorylated |                            |                            |                                    |
| 537 PSA4     | PSA4_HUMAN   | PSA4; Q53XP2; Q7Z474 | P25789; Q53XP2; Q8TBD1; Q7Z474                                                                                                 | NP_002780; NP_001096; 137       | Proteasome subunit alpha type-4 (EC 3.4.25.1) (Proteasome component C5) (Macropain subunit C5) (Multicatalytic endopeptidase complex subunit C5) (Proteasome subunit L); Proteasome subunit alpha type (EC 3.4.25.1)                                                                                                                                                                                                                  | GO:0031145; GO:0005829; GO:0042802; GO:0051436; GO:0051437; GO:0005839; GO:0004298; GO:0005511                                                                                                                                                                         | anaphase-promoting complex-dependent proteasomal ubiquitin-dependent protein catabolic process; cytosol; identical protein binding; negative regulation of ubiquitin-protein ligase activity during mitotic cell cycle; nucleus; positive regulation of ubiquitin-protein ligase activity during mitotic cell cycle; proteasome core complex; threonine-type endopeptidase activity; cytosol; ubiquitin-dependent protein catabolic process                | CytoplasmNucleus                                                                                                                                                                              | Known in UniProt to be phosphorylated |                            |                            |                                    |
| 538 PSA7     | PSA7_HUMAN   | PSA7; B2R515         | Q14810; Q9BR53; Q9H4K5; Q9H4R0; B2R515                                                                                         | NP_002783                       | Proteasome subunit alpha type-7 (EC 3.4.25.1) (Proteasome subunit RC6-1) (Proteasome subunit XAPC7)                                                                                                                                                                                                                                                                                                                                   | GO:0031145; GO:0005829; GO:0042802; GO:0051436; GO:0005634; GO:0051437; GO:0005839; GO:0004298                                                                                                                                                                         | anaphase-promoting complex-dependent proteasomal ubiquitin-dependent protein catabolic process; cytosol; identical protein binding; negative regulation of ubiquitin-protein ligase activity during mitotic cell cycle; nucleus; positive regulation of ubiquitin-protein ligase activity during mitotic cell cycle; proteasome core complex; threonine-type endopeptidase activity                                                                        | CytoplasmNucleus                                                                                                                                                                              |                                       |                            |                            |                                    |
| 539 PSB10    | PSB10_HUMAN  | PSB10; B2R514        | P40306; Q5U098; B2R514                                                                                                         | NP_002792                       | Proteasome subunit beta type-10 (EC 3.4.25.1) (Proteasome subunit beta-2) (Proteasome MECL-1) (Macropain subunit MECL-1) (Multicatalytic endopeptidase complex subunit MECL-1)                                                                                                                                                                                                                                                        | GO:0031145; GO:0005829; GO:0006909; GO:0051436; GO:0005634; GO:0051437; GO:0005839; GO:0004298                                                                                                                                                                         | anaphase-promoting complex-dependent proteasomal ubiquitin-dependent protein catabolic process; cytosol; humoral immune response; negative regulation of ubiquitin-protein ligase activity during mitotic cell cycle; nucleus; positive regulation of ubiquitin-protein ligase activity during mitotic cell cycle; proteasome core complex; threonine-type endopeptidase activity                                                                          | CytoplasmNucleus                                                                                                                                                                              |                                       |                            |                            |                                    |
| 540 PSB1     | PSB1_HUMAN   | PSB1                 | P20618; B5B076; Q9BW8A                                                                                                         | NP_002784                       | Proteasome subunit beta type-1 (EC 3.4.25.1) (Proteasome component C5) (Macropain subunit C5) (Multicatalytic endopeptidase complex subunit C5) (Proteasome gamma chain)                                                                                                                                                                                                                                                              | GO:0031145; GO:0005829; GO:0051436; GO:0051437; GO:0005839; GO:0005515; GO:0004298                                                                                                                                                                                     | anaphase-promoting complex-dependent proteasomal ubiquitin-dependent protein catabolic process; cytosol; negative regulation of ubiquitin-protein ligase activity during mitotic cell cycle; nucleus; positive regulation of ubiquitin-protein ligase activity during mitotic cell cycle; proteasome core complex; protein binding; threonine-type endopeptidase activity                                                                                  | CytoplasmNucleus                                                                                                                                                                              | Known in UniProt to be phosphorylated |                            |                            |                                    |
| 541 PSB2     | PSB2_HUMAN   | PSB2                 | P49721; Q9BW29; P31455                                                                                                         | NP_002785                       | Proteasome subunit beta type-2 (EC 3.4.25.1) (Proteasome component C7-1) (Macropain subunit C7-1) (Multicatalytic endopeptidase complex subunit C7-1)                                                                                                                                                                                                                                                                                 | GO:0031145; GO:0005829; GO:0051436; GO:0005634; GO:0051437; GO:0005839; GO:0004298                                                                                                                                                                                     | anaphase-promoting complex-dependent proteasomal ubiquitin-dependent protein catabolic process; cytosol; negative regulation of ubiquitin-protein ligase activity during mitotic cell cycle; nucleus; positive regulation of ubiquitin-protein ligase activity during mitotic cell cycle; proteasome core complex; protein binding; threonine-type endopeptidase activity                                                                                  | CytoplasmNucleus                                                                                                                                                                              |                                       |                            |                            |                                    |
| 542 PSB9     | PSB9_HUMAN   | PSB9; Q5JNW4         | P28065; Q5JNW4; Q1Q523                                                                                                         | NP_002791; NP_683756            | Proteasome subunit beta type-9 (EC 3.4.25.1) (Proteasome subunit beta-1) (Proteasome chain 7) (Macropain chain 7) (Multicatalytic endopeptidase complex chain 7) (RING12 protein) (Low molecular mass protein 2); PSB9 protein (Proteasome (Prosome, macropain) subunit, beta type, 9 (Large multifunctional peptidase 2)) (Proteasome (Prosome, macropain) subunit, beta type, 9 (Large multifunctional peptidase 2), isoform CRA_b) | GO:0031145; GO:0005829; GO:0006955; GO:0051436; GO:0005634; GO:0051437; GO:0005839; GO:0004298; GO:0006511                                                                                                                                                             | anaphase-promoting complex-dependent proteasomal ubiquitin-dependent protein catabolic process; cytosol; immune response; negative regulation of ubiquitin protein ligase activity during mitotic cell cycle; nucleus; positive regulation of ubiquitin-protein ligase activity during mitotic cell cycle; proteasome core complex; threonine-type endopeptidase activity; cytosol; ubiquitin-dependent protein catabolic process                          | CytoplasmNucleus                                                                                                                                                                              |                                       |                            |                            |                                    |
| 543 PGH2     | PGH2_HUMAN   | PGH2; ABK802         | P35354; Q16876; ABK802                                                                                                         | NP_000954                       | Prostaglandin G/H synthase 2 (EC 1.14.99.1) (Cyclooxygenase-2) (COX-2) (Prostaglandin-endoperoxide synthase 2) (Prostaglandin H2 synthase 2) (PGH synthase 2) (PGHS-2) (PHS II)                                                                                                                                                                                                                                                       | GO:0006028; GO:0019371; GO:0005784; GO:0005789; GO:0002037; GO:0005792; GO:0005634; GO:0055114; GO:0016702; GO:0004601; GO:0004666; GO:0008217; GO:0006979                                                                                                             | cell motion; cyclooxygenase pathway; endoplasmic reticulum lumen; endoplasmic reticulum membrane; heme binding; microsome; nucleus; oxidation reduction; oxidoreductase activity, acting on single donors with incorporation of molecular oxygen, incorporation of two atoms of oxygen; peroxidase activity; prostaglandin-endoperoxide synthase activity; regulation of blood pressure; regulation of inflammatory response; response to oxidative stress | MicrosomesmembraneP<br>eriplasmicmembranePro<br>teinEndoplasmicreticu<br>lummembranePeriphera                                                                                                 | Known in UniProt to be phosphorylated |                            |                            |                                    |
| 544 DHPR     | DHPR_HUMAN   | DHPR; ABK158         | P09417; Q53F52; Q9H1M5; ABK158                                                                                                 | NP_000311                       | Dihydropteridine reductase (EC 1.5.1.34) (HDHPR) (Quinoid dihydropteridine reductase)                                                                                                                                                                                                                                                                                                                                                 | GO:0005155; GO:0006559; GO:0005488; GO:0005737; GO:0051066; GO:0009055; GO:0055114; GO:0005525; GO:0003024; GO:0007155; GO:0030659; GO:0015031; GO:0007264; GO:0009523; GO:0006888; GO:0033116; GO:0005525; GO:0003024; GO:0001039; GO:0005789; GO:0004240; GO:0005264 | 6,7-dihydropteridine reductase activity; L-phenylalanine catabolic process; binding; cytoplasm; dihydrobiopterin metabolic process; electron carrier activity; oxidation reduction; tetrahydrobiopterin biosynthetic process                                                                                                                                                                                                                               |                                                                                                                                                                                               |                                       |                            |                            |                                    |
| 545 RAB13    | RAB13_HUMAN  | RAB13                | P51153; Q5U040; ABK685; Q6GPG6; Q9G6U4                                                                                         | NP_002861                       | Ras-related protein Rab-13 (Cell growth-inhibiting gene 4 protein)                                                                                                                                                                                                                                                                                                                                                                    | GO:0005525; GO:0003024; GO:0007155; GO:0030659; GO:0015031; GO:0007264; GO:0009523; GO:0006888; GO:0033116; GO:0005525; GO:0003024; GO:0001039; GO:0005789; GO:0004240; GO:0005264                                                                                     | GTP binding; GTPase activity; cell adhesion; cytoplasmic vesicle membrane; protein transport; small GTPase mediated signal transduction; tight junction; vesicle-mediated transport                                                                                                                                                                                                                                                                        | Celljunctiontightjunctio<br>adhesion; cytoplasmicvesiclemembrane; protein transport; small GTPase mediated cheCytoplasmicscaCy<br>toplasmicsvesidemembr<br>aneLipidanchorCytopla<br>smicsidic | Known in UniProt to be phosphorylated |                            |                            |                                    |
| 546 RAB2A    | RAB2A_HUMAN  | RAB2A; B2R5W8        | P61019; P08886; B2R5W8                                                                                                         | NP_002856                       | Ras-related protein Rab-2A                                                                                                                                                                                                                                                                                                                                                                                                            | GO:0005525; GO:0003024; GO:0007155; GO:0030659; GO:0015031; GO:0007264; GO:0009523; GO:0006888; GO:0033116; GO:0005525; GO:0003024; GO:0001039; GO:0005789; GO:0004240; GO:0005264                                                                                     | ER to Golgi vesicle-mediated transport; Golgi intermediate compartment membrane; GTP binding; GTPase activity; Golgi membrane; endoplasmic reticulum membrane; melanosome; protein transport; small GTPase mediated signal transduction                                                                                                                                                                                                                    | Endoplasmicreticulum<br>Golgiintermediatecomp<br>artmentmembraneLipid<br>anchordanchoreMelanosomem<br>embraneLipidanchorGol<br>giapparatusmembrane<br>Lipidanchor                             |                                       |                            |                            |                                    |

| Protein Name | Uniprot Name | Other Names                                               | Uniprot ID                                                                                                                                                                                                                           | Refseq IDs                                                 | Protein Description                                                                                                                                                                                                                                                                                                                                                                                                                                                                      | GO ID                                                                                                                                                                                                                                       | GO terms                                                                                                                                                                                                                                                                                                                                                                                                                                                                                                                                                                                                                                                                       | Subcellular location                                                                   | Comments                              | Comments - Database Search            | Comments - Database Search | Function |
|--------------|--------------|-----------------------------------------------------------|--------------------------------------------------------------------------------------------------------------------------------------------------------------------------------------------------------------------------------------|------------------------------------------------------------|------------------------------------------------------------------------------------------------------------------------------------------------------------------------------------------------------------------------------------------------------------------------------------------------------------------------------------------------------------------------------------------------------------------------------------------------------------------------------------------|---------------------------------------------------------------------------------------------------------------------------------------------------------------------------------------------------------------------------------------------|--------------------------------------------------------------------------------------------------------------------------------------------------------------------------------------------------------------------------------------------------------------------------------------------------------------------------------------------------------------------------------------------------------------------------------------------------------------------------------------------------------------------------------------------------------------------------------------------------------------------------------------------------------------------------------|----------------------------------------------------------------------------------------|---------------------------------------|---------------------------------------|----------------------------|----------|
| 547 RAC2     | RAC2_HUMAN   | RAC2                                                      | P15153                                                                                                                                                                                                                               | NP_002863                                                  | Ras-related C3 botulinum toxin substrate 2 (p21-Rac2) (Small G protein) (Gx)                                                                                                                                                                                                                                                                                                                                                                                                             | GO:0005252;<br>GO:0003924;<br>GO:0005737;<br>GO:0005515;<br>GO:0010310;<br>GO:0006063;                                                                                                                                                      | GTP binding; GTPase activity; cytoplasm; protein binding; regulation of hydrogen peroxide metabolic process; regulation of respiratory burst; small GTPase mediated signal transduction                                                                                                                                                                                                                                                                                                                                                                                                                                                                                        | Cytoplasm                                                                              |                                       |                                       |                            |          |
| 548 RALB     | RALB_HUMAN   | RALB; Q6Z574;<br>Q5T3T2;<br>Q6Z574                        | P11234;<br>Q5T3T2;<br>Q6Z574                                                                                                                                                                                                         | NP_002872                                                  | Ras-related protein RalB; Putative uncharacterized protein RALB (V-ral simian leukemia viral oncogene homolog B (Ras related); GTP binding protein), isoform CRA_b (cDNA, FL392808, Homo sapiens v-ral simian leukemia viral oncogene homolog B (ras related); GTP binding protein) (RALB), mRNA); cDNA FL345773 fis, clone NTRP2003446, highly similar to Ras-related protein RAL-B (V-ral simian leukemia viral oncogene homolog B (Ras related); GTP binding protein), isoform CRA_b) | GO:0005252;<br>GO:0007265;<br>GO:0005222;<br>GO:0005886;<br>GO:0005515;                                                                                                                                                                     | GTP binding; Ras protein signal transduction; intracellular; plasma membrane; protein binding; small GTPase mediated signal transduction                                                                                                                                                                                                                                                                                                                                                                                                                                                                                                                                       | CellmembraneLipidanc<br>horCytoplasmicside;                                            |                                       |                                       |                            |          |
| 549 RANG     | RANG_HUMAN   | RANG                                                      | P43487                                                                                                                                                                                                                               | NP_002873                                                  | Ran-specific GTPase-activating protein (Ran-binding protein 1) (RanBP1)                                                                                                                                                                                                                                                                                                                                                                                                                  | GO:0005092;<br>GO:0005096;<br>GO:0008536;<br>GO:0004907;<br>GO:0005634;                                                                                                                                                                     | GDP-dissociation inhibitor activity; GTPase activator activity; Ran GTPase binding; intracellular transport; nucleus; signal transduction                                                                                                                                                                                                                                                                                                                                                                                                                                                                                                                                      |                                                                                        |                                       | Known in Uniprot to be phosphorylated |                            |          |
| 550 RARR2    | RARR2_HUMAN  | RARR2; Q7LE02                                             | Q09969;<br>Q7LE02                                                                                                                                                                                                                    | NP_002880                                                  | Retinoic acid receptor responder protein 2 (Tazarotene-induced gene 2 protein) (RAR-responsive protein TIG2); RARRES2 protein (Putative uncharacterized protein RARRES2) (Retinoic acid receptor responder (Tazarotene induced) 2, isoform CRA_a) (cDNA, FL392484, Homo sapiens retinoic acid receptor responder (tazarotene induced)2 (RARRES2), mRNA)                                                                                                                                  | GO:0005276;<br>GO:0005578;<br>GO:0001523;                                                                                                                                                                                                   | extracellular region; retinoid metabolic process; receptor activity                                                                                                                                                                                                                                                                                                                                                                                                                                                                                                                                                                                                            | Secreted;                                                                              |                                       |                                       |                            |          |
| 551 RADI     | RADI_HUMAN   | RADI; Q6PKD3;<br>Q80961;<br>B0Y388;<br>Q6PKD3             | P35241;<br>Q80961;<br>B0Y388;<br>Q6PKD3                                                                                                                                                                                              | NP_002897                                                  | Radixin; RDX protein (Fragment)                                                                                                                                                                                                                                                                                                                                                                                                                                                          | GO:0003779;<br>GO:0015016;<br>GO:0005737;<br>GO:0005856;<br>GO:0019898;<br>GO:0005886;<br>GO:0007605;<br>GO:00045176;<br>GO:0008092;<br>GO:0030175;<br>GO:0003007;<br>GO:0001726;                                                           | actin binding; barbed-end actin filament capping; cytoplasm; cytoskeleton; extrinsic to membrane; plasma membrane; sensory perception of sound; apical part of cell; apical protein localization; cytoskeletal protein binding; filopodium; lamellipodium; microvillus assembly; ruffle; stereocilium                                                                                                                                                                                                                                                                                                                                                                          | CellmembranePeripher<br>almembraneproteinCyt<br>oplasmicsideCytoplasm<br>cytoskeleton; | Known in Uniprot to be phosphorylated | Known in HPRD to be phosphorylated    |                            |          |
| 552 RGS10    | RGS10_HUMAN  | RGS10; Q6IAZ6;<br>Q6IAZ6;<br>Q43665;<br>AK8408;<br>Q96GN0 | Q6IAZ6;<br>Q6IAZ6;<br>Q43665;<br>AK8408;<br>Q96GN0                                                                                                                                                                                   | NP_002916;<br>NP_001005<br>339                             | Regulator of G-protein signaling 10 (RGS10)                                                                                                                                                                                                                                                                                                                                                                                                                                              | GO:0009968;<br>GO:0005515;<br>GO:0004871                                                                                                                                                                                                    | negative regulation of signal transduction; protein binding; signal transducer activity                                                                                                                                                                                                                                                                                                                                                                                                                                                                                                                                                                                        |                                                                                        | Known in Uniprot to be phosphorylated | Known in HPRD to be phosphorylated    |                            |          |
| 553 ROBO1    | ROBO1_HUMAN  | ROBO1                                                     | Q9Y6N7;<br>Q23200;<br>Q9BUS7                                                                                                                                                                                                         | NP_002932                                                  | Roundabout homolog 1 (H-Robo-1) (Deleted in U twenty twenty)                                                                                                                                                                                                                                                                                                                                                                                                                             | GO:0008046;<br>GO:0005016;<br>GO:0006935;<br>GO:0007156;<br>GO:0042802;<br>GO:0005887;<br>GO:0005772;                                                                                                                                       | axon guidance receptor activity; cell surface chemotaxis; homophilic cell adhesion; identical protein binding; integral to plasma membrane; positive regulation of axonogenesis                                                                                                                                                                                                                                                                                                                                                                                                                                                                                                | MembraneSinglepassy<br>peptideprotein                                                  | Known in Uniprot to be phosphorylated |                                       |                            |          |
| 554 RL19     | RL19_HUMAN   | RL19                                                      | P84098;<br>B2R4K2;<br>P14118;<br>P22908;<br>Q50295;<br>Q726E4                                                                                                                                                                        | XP_068464;<br>NP_000972                                    | 60S ribosomal protein L19                                                                                                                                                                                                                                                                                                                                                                                                                                                                | GO:0003723;<br>GO:0022625;<br>GO:0003735;<br>GO:0006414;                                                                                                                                                                                    | RNA binding; cytosolic large ribosomal subunit; structural constituent of ribosome; translational elongation                                                                                                                                                                                                                                                                                                                                                                                                                                                                                                                                                                   |                                                                                        | Known in Uniprot to be phosphorylated |                                       |                            |          |
| 555 RL26     | RL26_HUMAN   | RL26                                                      | P61254;<br>Q02877;<br>Q6IPY2                                                                                                                                                                                                         | XP_291724;<br>NP_000978                                    | 60S ribosomal protein L26                                                                                                                                                                                                                                                                                                                                                                                                                                                                | GO:0003723;<br>GO:0022625;<br>GO:0005515;<br>GO:0006364;<br>GO:0042733;<br>GO:0003735;                                                                                                                                                      | RNA binding; cytosolic large ribosomal subunit; protein binding; rRNA processing; ribosomal large subunit biogenesis; structural constituent of ribosome; translational elongation                                                                                                                                                                                                                                                                                                                                                                                                                                                                                             |                                                                                        | Known in Uniprot to be phosphorylated |                                       |                            |          |
| 556 RL31     | RL31_HUMAN   | RL31                                                      | P62899;<br>P12947;<br>Q535Q5;<br>Q6L836                                                                                                                                                                                              | XP_292188;<br>NP_000984                                    | 60S ribosomal protein L31                                                                                                                                                                                                                                                                                                                                                                                                                                                                | GO:0003723;<br>GO:0022625;<br>GO:0005515;<br>GO:0003735;                                                                                                                                                                                    | RNA binding; cytosolic large ribosomal subunit; protein binding; structural constituent of ribosome; translational elongation                                                                                                                                                                                                                                                                                                                                                                                                                                                                                                                                                  |                                                                                        | Known in Uniprot to be phosphorylated |                                       |                            |          |
| 557 RL7A     | RL7A_HUMAN   | RL7A; Q5T8U4                                              | P62424;<br>Q5T8U4;<br>P11518                                                                                                                                                                                                         | XP_210183;<br>NP_000963                                    | 60S ribosomal protein L7a (Surfeit locus protein 3) (PLA-X polypeptide); Ribosomal protein L7a (cDNA FL378489, highly similar to Homo sapiens ribosomal protein L7a (RPL7A), mRNA) (Ribosomal protein L7a, isoform CRA_c) (cDNA, FL392002, Homo sapiens ribosomal protein L7a (RPL7A), mRNA)                                                                                                                                                                                             | GO:0003723;<br>GO:0022625;<br>GO:0005515;<br>GO:0042788;<br>GO:0042254;<br>GO:0003735;<br>GO:0006414;<br>GO:0005840;                                                                                                                        | RNA binding; cytosolic large ribosomal subunit; membrane fraction; polysomal ribosome; ribosome biogenesis; structural constituent of ribosome; translational elongation; ribosome; translation                                                                                                                                                                                                                                                                                                                                                                                                                                                                                |                                                                                        |                                       |                                       |                            |          |
| 558 RS15     | RS15_HUMAN   | RS15                                                      | P62841;<br>A5DBV9;<br>P11747;<br>Q360A1                                                                                                                                                                                              | XP_059465;<br>NP_001009                                    | 40S ribosomal protein S15 (RIG protein)                                                                                                                                                                                                                                                                                                                                                                                                                                                  | GO:0006412;<br>GO:0003727;<br>GO:0022627;<br>GO:0005654;<br>GO:0005515;<br>GO:0006364;<br>GO:0042274;<br>GO:0000056;<br>GO:0003735;<br>GO:0006414;                                                                                          | DNA binding; cytosolic small ribosomal subunit; nucleoplasm; protein binding; rRNA processing; ribosomal small subunit biogenesis; ribosomal small subunit export from nucleus; structural constituent of ribosome; translational elongation                                                                                                                                                                                                                                                                                                                                                                                                                                   |                                                                                        | Known in Uniprot to be phosphorylated |                                       |                            |          |
| 559 RS20     | RS20_HUMAN   | RS20                                                      | P60866;<br>P17075;<br>Q5M859                                                                                                                                                                                                         | XP_299876;<br>NP_001014                                    | 40S ribosomal protein S20                                                                                                                                                                                                                                                                                                                                                                                                                                                                | GO:0003723;<br>GO:0022627;<br>GO:0005515;<br>GO:0003735;                                                                                                                                                                                    | RNA binding; cytosolic small ribosomal subunit; protein binding; structural constituent of ribosome; translational elongation                                                                                                                                                                                                                                                                                                                                                                                                                                                                                                                                                  |                                                                                        | Known in Uniprot to be phosphorylated |                                       |                            |          |
| 560 UBIQ     | UBIQ_HUMAN   | UBIQ; RS27A;<br>B2R0W1                                    | P62988;<br>P62979;<br>P14798;<br>Q6L8L4;<br>NP_001129<br>Q98Q77;<br>P02246;<br>P02249;<br>P02250;<br>Q29120;<br>Q6LUD5;<br>Q81WY8;<br>Q91887;<br>Q91888;<br>Q98W06;<br>Q98X98;<br>Q9UEF2;<br>Q9UEG1;<br>Q9UEK8;<br>Q9LKP7;<br>B2R0W1 | NP_002945;<br>NP_061828;<br>NP_066289;<br>NP_001129<br>064 | 40S ribosomal protein S27a; Ubiquitin                                                                                                                                                                                                                                                                                                                                                                                                                                                    | GO:0003723;<br>GO:0003735;<br>GO:0006414;<br>GO:0008270;<br>GO:0031145;<br>GO:0007411;<br>GO:0005829;<br>GO:0054336;<br>GO:0009554;<br>GO:0045941;<br>GO:0005515;<br>GO:0016567;<br>GO:0048167;                                             | cytosolic small ribosomal subunit; structural constituent of ribosome; translational elongation; zinc ion binding; ER-associated protein catabolic process; anaphase-promoting complex-dependent proteasomal ubiquitin-dependent protein catabolic process; axon guidance; cytosol; long-term strengthening of neuromuscular junction; negative regulation of ubiquitin-protein ligase activity during mitotic cell cycle; nucleoplasm; positive regulation of transcription; positive regulation of ubiquitin-protein ligase activity during mitotic cell cycle; protein binding; protein ubiquitination; regulation of synaptic plasticity; transcription regulator activity | ; CytoplasmNucleus                                                                     | Known in Uniprot to be phosphorylated |                                       |                            |          |
| 561 RS3A     | RS3A_HUMAN   | RS3A; B2R4D4                                              | P61247;<br>P33443;<br>P49241;<br>B2R4D4                                                                                                                                                                                              | NP_000997                                                  | 40S ribosomal protein S3a                                                                                                                                                                                                                                                                                                                                                                                                                                                                | GO:0003723;<br>GO:0022627;<br>GO:0006917;<br>GO:0005730;<br>GO:0005515;<br>GO:0003735;                                                                                                                                                      | RNA binding; cytosolic small ribosomal subunit; induction of apoptosis; nucleus; protein binding; structural constituent of ribosome; translational elongation; translational initiation                                                                                                                                                                                                                                                                                                                                                                                                                                                                                       |                                                                                        | Known in Uniprot to be phosphorylated |                                       |                            |          |
| 562 S10A7    | S10A7_HUMAN  | Q5SY67; S10A7                                             | F31151;<br>Q6FGE3;<br>Q5Y677;<br>Q9H1E2                                                                                                                                                                                              | NP_002954                                                  | Protein S100-A7 (S100 calcium-binding protein A7) (Psoriasin)                                                                                                                                                                                                                                                                                                                                                                                                                            | GO:0006414;<br>GO:0006413;<br>GO:0005525;<br>GO:0005509;<br>GO:0005829;<br>GO:0005029;<br>GO:0005783;<br>GO:0008544;<br>GO:0005976;<br>GO:0005925;<br>GO:0045087;<br>GO:0030216;<br>GO:0005634;<br>GO:0005515;<br>GO:0003002;<br>GO:0008270 | angiogenesis; calcium ion binding; cytosol; defense response to Gram-negative bacterium; endoplasmic reticulum; epidermis development; extracellular region; focal adhesion; innate immune response; keratinocyte differentiation; nucleus; protein binding; response to reactive oxygen species; sequestering of metal ion; zinc ion binding                                                                                                                                                                                                                                                                                                                                  | CytoplasmSecreted                                                                      |                                       |                                       |                            |          |
| 563 S10A9    | S10A9_HUMAN  | S10A9                                                     | P06702;<br>Q6K404;<br>Q9NYM0;<br>Q9UCJ1                                                                                                                                                                                              | NP_002956                                                  | Protein S100-A9 (S100 calcium-binding protein A9) (Calgranulin-B) (Migration inhibitory factor-related protein 14) (MRP-14) (P14) (Leukocyte L1 complex heavy chain) (Calprotectin L1H subunit)                                                                                                                                                                                                                                                                                          | GO:0005509;<br>GO:0005737;<br>GO:0006954;<br>GO:0005634;<br>GO:0005515;<br>GO:0004871;                                                                                                                                                      | calcium ion binding; cell-cell signaling; cytoplasm; inflammatory response; nucleus; protein binding; signal transducer activity                                                                                                                                                                                                                                                                                                                                                                                                                                                                                                                                               |                                                                                        | Known in Uniprot to be phosphorylated | Known in HPRD to be phosphorylated    |                            |          |
| 564 SH3L1    | SH3L1_HUMAN  | SH3L1                                                     | Q73368;<br>Q3SYL1;<br>Q5T5T0;<br>Q6F7E8;<br>Q9H0N8                                                                                                                                                                                   | NP_003013                                                  | SH3 domain-binding glutamic acid-rich-like protein                                                                                                                                                                                                                                                                                                                                                                                                                                       | GO:0005515;<br>GO:0017124;<br>GO:0005070;<br>GO:0005737;                                                                                                                                                                                    | SH3 domain binding; SH3/SH2 adaptor activity; cytoplasm; nucleus                                                                                                                                                                                                                                                                                                                                                                                                                                                                                                                                                                                                               |                                                                                        |                                       |                                       |                            |          |
| 565 SYUA     | SYUA_HUMAN   | SYUA; ABK244                                              | P37840;<br>Q13703;<br>Q43H13;<br>Q6LAU6;<br>ABK244                                                                                                                                                                                   | NP_000336;<br>NP_001139<br>526;<br>NP_0011395<br>27        | Alpha-synuclein (Non-A beta component of AD amyloid) (Non-A4 component of amyloid precursor) (NACP)                                                                                                                                                                                                                                                                                                                                                                                      | GO:0005829;<br>GO:0005737;<br>GO:0016020;<br>GO:0032769;<br>GO:0005634;<br>GO:0005515;<br>GO:0007154;                                                                                                                                       | cytosol; fibril; membrane; negative regulation of monoxygenase activity; nucleus; protein binding; regulation of dopamine secretion                                                                                                                                                                                                                                                                                                                                                                                                                                                                                                                                            | CytoplasmMembraneN<br>ucleus                                                           | Known in Uniprot to be phosphorylated | Known in HPRD to be phosphorylated    |                            |          |
| 566 SNX3     | SNX3_HUMAN   | SNX3; Q4TT31                                              | Q69493;<br>Q4TT31;<br>Q60718;<br>Q5XK77;<br>Q5XK77;<br>Q96AP9;<br>QK0339;<br>Q9NLU45                                                                                                                                                 | NP_003786;<br>NP_600400                                    | Sorting nexin-3 (Protein SDP3)                                                                                                                                                                                                                                                                                                                                                                                                                                                           | GO:0007154;<br>GO:0005737;<br>GO:0006897;<br>GO:0035091;<br>GO:0014909;                                                                                                                                                                     | cell communication; cytoplasm; endocytosis; phosphatidyle binding; protein phosphatase binding; protein transport                                                                                                                                                                                                                                                                                                                                                                                                                                                                                                                                                              |                                                                                        | Known in Uniprot to be phosphorylated |                                       |                            |          |

| Protein Name | Uniprot Name | Other Names   | Uniprot ID                                                                                                    | Refseq IDs                      | Protein Description                                                                                                                                                                                                                                                                                                                                                                                                                     | GO ID                                                                                                                                                                                                                                                                                                                                                                                                                                                                                                      | GO terms                                                                                                                                                                                                                                                                                                                                                                                                                                                                                                                                                                                                                                                                                                                                                                                                                                                                                                                                                                                                                                                                                                                                                                                                                                                                                                                                                                                                                                                             | Subcellular location   | Comments | Comments - Database Search            | Comments - Database Search         | Function |
|--------------|--------------|---------------|---------------------------------------------------------------------------------------------------------------|---------------------------------|-----------------------------------------------------------------------------------------------------------------------------------------------------------------------------------------------------------------------------------------------------------------------------------------------------------------------------------------------------------------------------------------------------------------------------------------|------------------------------------------------------------------------------------------------------------------------------------------------------------------------------------------------------------------------------------------------------------------------------------------------------------------------------------------------------------------------------------------------------------------------------------------------------------------------------------------------------------|----------------------------------------------------------------------------------------------------------------------------------------------------------------------------------------------------------------------------------------------------------------------------------------------------------------------------------------------------------------------------------------------------------------------------------------------------------------------------------------------------------------------------------------------------------------------------------------------------------------------------------------------------------------------------------------------------------------------------------------------------------------------------------------------------------------------------------------------------------------------------------------------------------------------------------------------------------------------------------------------------------------------------------------------------------------------------------------------------------------------------------------------------------------------------------------------------------------------------------------------------------------------------------------------------------------------------------------------------------------------------------------------------------------------------------------------------------------------|------------------------|----------|---------------------------------------|------------------------------------|----------|
| 567 SODC     | SODC_HUMAN   | SODC; Q6R8RS  | P09441; Q6R8RS; A6AHJ0; Q16699; Q16711; Q16838; Q16839; Q16840                                                | NP_000445                       | Superoxide dismutase [Cu-Zn] (EC 1.15.1.1)                                                                                                                                                                                                                                                                                                                                                                                              | GO:0006309; GO:0001817; GO:0016209; GO:0006088; GO:0007569; GO:0043425; GO:0006879; GO:0051087; GO:0005507; GO:0031410; GO:0005829; GO:0032839; GO:0006302; GO:0007566; GO:0031012; GO:0009615; GO:0006749; GO:0006047; GO:0007036; GO:0005759; GO:0046716; GO:0032287; GO:0002262; GO:0045541; GO:0043524; GO:0006052; GO:0005634; GO:0001541; GO:0055114; GO:0005777; GO:0001890; GO:0043065; GO:0001819; GO:0043744; GO:0008203; GO:0001817; GO:0006869; GO:0030169; GO:0034162; GO:0006898; GO:0004888 | DNA fragmentation involved in apoptosis; activation of MAPK receptor; antioxidant activity; auditory receptor cell stereocilium organization; cell aging; cell soma; cellular iron ion homeostasis; chaperone binding; copper ion binding; cytoplasmic vesicle; cytosol; dendrite cytoplasm; double-strand break repair; embryo implantation; extracellular matrix; extracellular space; glutathione metabolic process; heart contraction; hydrogen peroxide biosynthetic process; locomotory behavior; mitochondrial matrix; muscle maintenance; myelin maintenance in the peripheral nervous system; myeloid cell homeostasis; negative regulation of cholesterol biosynthetic process; negative regulation of neuron apoptosis; neurofilament cytoskeleton organization; nucleus; ovarian follicle development; oxidation reduction; peroxisome; placenta development; positive regulation of apoptosis; positive regulation of cytokine production; protein complex; protein homodimerization activity; protein phosphatase 2B binding; regulation of T cell differentiation in the thymus; regulation of blood pressure; regulation of mitochondrial membrane potential; regulation of multicellular organism growth; regulation of axon growth; cholesterol metabolic process; integral to plasma membrane; lipid transport; low-density lipoprotein binding; low-density lipoprotein particle; receptor-mediated endocytosis; transmembrane receptor activity | Cytoplasm              |          | Known in Uniprot to be phosphorylated |                                    |          |
| 568 SORL     | SORL_HUMAN   | SORL; B2RNK7  | Q92673; Q92674; B2RNK7                                                                                        | NP_003096                       | Sortilin-related receptor (Sorting protein-related receptor containing LDLR class A repeats) (SorLA) (SorLA-1) (Low-density lipoprotein receptor relative with 11 ligand-binding repeats) (LDLR1) relative with 11 ligand-binding repeats (LDLR1)                                                                                                                                                                                       | GO:0008203; GO:0001817; GO:0006869; GO:0030169; GO:0034162; GO:0006898; GO:0004888                                                                                                                                                                                                                                                                                                                                                                                                                         | regulation of multicellular organism growth; regulation of axon growth; cholesterol metabolic process; integral to plasma membrane; lipid transport; low-density lipoprotein binding; low-density lipoprotein particle; receptor-mediated endocytosis; transmembrane receptor activity                                                                                                                                                                                                                                                                                                                                                                                                                                                                                                                                                                                                                                                                                                                                                                                                                                                                                                                                                                                                                                                                                                                                                                               | MembraneSinglepassy pe |          |                                       |                                    |          |
| 569 SPRC     | SPRC_HUMAN   | SPRC; Q61B84  | P09486; Q61B84                                                                                                | NP_003109                       | SPARC (Secreted protein acidic and rich in cysteine) (Osteonectin) (ON) (Basement-membrane protein 40) (BM-40); SPARC protein (Secreted protein acidic, cysteine-rich (Osteonectin), isoform CDA 3)                                                                                                                                                                                                                                     | GO:0005604; GO:0005518; GO:0005507; GO:0001503; GO:0031093; GO:0007169; GO:0005509; GO:0042127                                                                                                                                                                                                                                                                                                                                                                                                             | basement membrane; calcium ion binding; collagen binding; copper ion binding; ossification; platelet alpha granule lumen; transmembrane receptor protein tyrosine kinase signaling pathway; calcium ion binding; extracellular matrix; regulation of cell proliferation                                                                                                                                                                                                                                                                                                                                                                                                                                                                                                                                                                                                                                                                                                                                                                                                                                                                                                                                                                                                                                                                                                                                                                                              | Secretedextracellulars |          |                                       |                                    |          |
| 570 SPTA2    | SPTA2_HUMAN  | SPTA2         | Q13813; Q13186; Q15324; Q16666; Q59EF1; Q5VXV5; Q5VXV6; Q720K5; Q9P0V0                                        | NP_003118; NP_001123            | Spectrin alpha chain, brain (Spectrin, non-erythroid alpha chain) (Alpha-II spectrin) (Fodrin alpha chain)                                                                                                                                                                                                                                                                                                                              | GO:0003779; GO:0001819; GO:0005509; GO:0005518; GO:0005529; GO:0005624; GO:0008091                                                                                                                                                                                                                                                                                                                                                                                                                         | actin binding; barbed-end actin filament capping; calcium ion binding; catenin binding; cytosol; membrane fraction; spectrin; structural constituent of cytoskeleton                                                                                                                                                                                                                                                                                                                                                                                                                                                                                                                                                                                                                                                                                                                                                                                                                                                                                                                                                                                                                                                                                                                                                                                                                                                                                                 | Cytoplasmcytoskeleton  |          | Known in Uniprot to be phosphorylated | Known in HPRD to be phosphorylated |          |
| 571 SORCN    | SORCN_HUMAN  | SORCN         | P30626                                                                                                        | NP_003121                       | Sorcin (22 kDa protein) (CP-22) (V19)                                                                                                                                                                                                                                                                                                                                                                                                   | GO:0005246; GO:0005509; GO:0005737; GO:0007507; GO:0006880; GO:0007517; GO:0005102; GO:0001508; GO:0008016; GO:0009942; GO:0007165; GO:0006810                                                                                                                                                                                                                                                                                                                                                             | calcium channel regulator activity; calcium ion binding; cytoplasm; heart development; intracellular sequestering of iron ion; muscle organ development; receptor binding; regulation of action potential; regulation of heart contraction; regulation of striated muscle contraction; signal transduction; transport                                                                                                                                                                                                                                                                                                                                                                                                                                                                                                                                                                                                                                                                                                                                                                                                                                                                                                                                                                                                                                                                                                                                                | Cytoplasm              |          |                                       |                                    |          |
| 572 STAM1    | STAM1_HUMAN  | STAM1; B0Y399 | Q92783; Q8M664; B0Y399                                                                                        | NP_003464                       | Signal transducing adapter molecule 1 (STAM-1)                                                                                                                                                                                                                                                                                                                                                                                          | GO:0005070; GO:0001819; GO:0031901; GO:0006886; GO:0007165                                                                                                                                                                                                                                                                                                                                                                                                                                                 | SH2/SH3 adaptor activity; cytosol; early endosome membrane; intracellular protein transport; signal transduction                                                                                                                                                                                                                                                                                                                                                                                                                                                                                                                                                                                                                                                                                                                                                                                                                                                                                                                                                                                                                                                                                                                                                                                                                                                                                                                                                     | CytoplasmEarlyendosome |          | Known in Uniprot to be phosphorylated | Known in HPRD to be phosphorylated |          |
| 573 STX7     | STX7_HUMAN   | STX7          | O15400; Q5SZW2; Q96E59                                                                                        | NP_003560                       | Syntaxin-7                                                                                                                                                                                                                                                                                                                                                                                                                              | GO:0006886; GO:0001602; GO:0009309; GO:0004062; GO:0006884; GO:0005737; GO:0008202; GO:0009055; GO:0020037; GO:0016021; GO:0004497; GO:0055114; GO:0001516; GO:0004796                                                                                                                                                                                                                                                                                                                                     | SNAP receptor activity; early endosome membrane; integral to membrane; intracellular protein transport; post-Golgi vesicle-mediated transport; amine biosynthetic process; aryl sulfotransferase activity; catecholamine metabolic process; cytosol; protein metabolic process; sulfotransferase activity                                                                                                                                                                                                                                                                                                                                                                                                                                                                                                                                                                                                                                                                                                                                                                                                                                                                                                                                                                                                                                                                                                                                                            | MembraneMultipassme    |          | Known in Uniprot to be phosphorylated | Known in HPRD to be phosphorylated |          |
| 574 STIA2    | STIA2_HUMAN  | STIA2; Q14C17 | P50226; A9QV25; P78313; Q14C17                                                                                | NP_001045; NP_803564            | Sulfotransferase 1A2 (EC 2.8.2.1) (Aryl sulfotransferase 2) (Phenyl-sulfating phenol sulfotransferase 2) (P-ST 2) (STIA2); Sulfotransferase family, cytosolic, 1A, phenol-preferring, member 2                                                                                                                                                                                                                                          | GO:0006886; GO:0009309; GO:0004062; GO:0006884; GO:0005737; GO:0008202; GO:0009055; GO:0020037; GO:0016021; GO:0004497; GO:0055114; GO:0001516; GO:0004796                                                                                                                                                                                                                                                                                                                                                 | electron carrier activity; heme binding; integral to membrane; monoxygenase activity; oxidation reduction; prostaglandin biosynthetic process; thromboxane-A synthase activity                                                                                                                                                                                                                                                                                                                                                                                                                                                                                                                                                                                                                                                                                                                                                                                                                                                                                                                                                                                                                                                                                                                                                                                                                                                                                       | Cytoplasm;             |          |                                       |                                    |          |
| 575 THAS     | THAS_HUMAN   | THAS; Q53F23  | P24557; Q14987; Q16844; Q8UN1; Q9GZM4; Q9HD77; Q9HD78; Q9HD79; Q9HD80; Q9HD81; Q9HD82; Q9HD83; Q9HD84; Q53F23 | NP_001052; NP_001124            | Thromboxane-A synthase (TXA synthase) (TXS) (Cyclochrome P450 SA1)                                                                                                                                                                                                                                                                                                                                                                      | GO:0006886; GO:0009309; GO:0004062; GO:0006884; GO:0005737; GO:0008202; GO:0009055; GO:0020037; GO:0016021; GO:0004497; GO:0055114; GO:0001516; GO:0004796                                                                                                                                                                                                                                                                                                                                                 | electron carrier activity; heme binding; integral to membrane; monoxygenase activity; oxidation reduction; prostaglandin biosynthetic process; thromboxane-A synthase activity                                                                                                                                                                                                                                                                                                                                                                                                                                                                                                                                                                                                                                                                                                                                                                                                                                                                                                                                                                                                                                                                                                                                                                                                                                                                                       | MembraneMultipassme    |          |                                       |                                    |          |
| 576 TIMP1    | TIMP1_HUMAN  | TIMP1; Q6FGX5 | P01033; Q6FGX5; Q14522; Q9UCJ1                                                                                | NP_003245                       | Metalloproteinase inhibitor 1 (Tissue inhibitor of metalloproteinases) (TIMP-1) (Erythroid-potentiating activity) (EPA) (Fibroblast collagenase inhibitor) (Collagenase inhibitor); TIMP metalloproteinase inhibitor 1 (TIMP1 protein) (TIMP metalloproteinase inhibitor 1, isoform CDA 4) (CDNA, FLJ29204, Homo sapiens tissue inhibitor of metalloproteinase 1 (erythroidpotentiating activity, collagenase inhibitor) (TIMP1), mRNA) | GO:0043249; GO:0008195; GO:0051045; GO:0008294; GO:0005515; GO:0005578; GO:0008191                                                                                                                                                                                                                                                                                                                                                                                                                         | erythrocyte maturation; metalloendopeptidase inhibitor activity; negative regulation of membrane protein ectodomain proteolysis; positive regulation of cell proliferation; protein binding; proteinaeous extracellular matrix; metalloendopeptidase inhibitor activity                                                                                                                                                                                                                                                                                                                                                                                                                                                                                                                                                                                                                                                                                                                                                                                                                                                                                                                                                                                                                                                                                                                                                                                              | Secreted;              |          |                                       |                                    |          |
| 577 TIMP3    | TIMP3_HUMAN  | TIMP3; B2BR9Y | P35625; Q5THV4; Q9UC74; Q9UGS2; B2BR9Y                                                                        | NP_000353                       | Metalloproteinase inhibitor 3 (Tissue inhibitor of metalloproteinases 3) (TIMP-3) (Protein MG-5)                                                                                                                                                                                                                                                                                                                                        | GO:0008191; GO:0005105; GO:0005515; GO:0007601                                                                                                                                                                                                                                                                                                                                                                                                                                                             | metalloendopeptidase inhibitor activity; negative regulation of membrane protein ectodomain proteolysis; protein binding; transmembrane receptor protein tyrosine kinase signaling pathway; visual perception                                                                                                                                                                                                                                                                                                                                                                                                                                                                                                                                                                                                                                                                                                                                                                                                                                                                                                                                                                                                                                                                                                                                                                                                                                                        | Secretedextracellulars |          |                                       |                                    |          |
| 578 TKT      | TKT_HUMAN    | TKT; AK8089   | P29401; Q8TBA3; Q9HHK3; AK8089                                                                                | NP_001055; NP_001128            | Transketolase (TK) (EC 2.2.1.1)                                                                                                                                                                                                                                                                                                                                                                                                         | GO:0005509; GO:0005829; GO:0008152; GO:0005515; GO:0004802                                                                                                                                                                                                                                                                                                                                                                                                                                                 | calcium ion binding; cytosol; metabolic process; protein binding; transketolase activity                                                                                                                                                                                                                                                                                                                                                                                                                                                                                                                                                                                                                                                                                                                                                                                                                                                                                                                                                                                                                                                                                                                                                                                                                                                                                                                                                                             |                        |          | Known in Uniprot to be phosphorylated | Known in HPRD to be phosphorylated |          |
| 579 TPIS     | TPIS_HUMAN   | TPIS; Q6FH9P  | P60174; Q6FH9P; P00938; Q6S07; Q6VW00; Q9AGG5                                                                 | NP_000356                       | Triosephosphate isomerase (TIM) (EC 5.3.1.1) (Triose-phosphate isomerase); Triosephosphate isomerase (EC 5.3.1.1) (Fragment)                                                                                                                                                                                                                                                                                                            | GO:0005829; GO:0006633; GO:0006094; GO:0006096; GO:0006098; GO:0004807; GO:0009790; GO:0006006; GO:0001968                                                                                                                                                                                                                                                                                                                                                                                                 | cytosol; fatty acid biosynthetic process; gluconeogenesis; glycolysis; pentose-phosphate shunt; triose-phosphate isomerase activity; embryonic development; glucose metabolic process; glyceraldehyde-3-phosphate metabolic process                                                                                                                                                                                                                                                                                                                                                                                                                                                                                                                                                                                                                                                                                                                                                                                                                                                                                                                                                                                                                                                                                                                                                                                                                                  |                        |          | Known in Uniprot to be phosphorylated | Known in HPRD to be phosphorylated |          |
| 580 TFP2     | TFP2_HUMAN   | TFP2          | P29144; Q9V2U8                                                                                                | NP_003282                       | Tripeptidyl-peptidase 2 (EC 3.4.14.10) (Tripeptidyl-peptidase II) (TPP-II) (Tripeptidyl aminopeptidase)                                                                                                                                                                                                                                                                                                                                 | GO:0004177; GO:0005737; GO:0006008; GO:0004252; GO:0008240                                                                                                                                                                                                                                                                                                                                                                                                                                                 | aminopeptidase activity; cytoplasm; proteolysis; serine-type endopeptidase activity; tripeptidyl-peptidase activity                                                                                                                                                                                                                                                                                                                                                                                                                                                                                                                                                                                                                                                                                                                                                                                                                                                                                                                                                                                                                                                                                                                                                                                                                                                                                                                                                  | Cytoplasm              |          |                                       |                                    |          |
| 581 TCTP     | TCTP_HUMAN   | TCTP; B2R7E5  | P13693; B2R7E5; Q6YLS2; Q7244; Q9AE82; Q9UC70                                                                 | NP_003286; NP_294045            | Translationally-controlled tumor protein (TCTP) (p23) (Histamine-releasing factor) (HRF) (Fortilin)                                                                                                                                                                                                                                                                                                                                     | GO:0006916; GO:0005509; GO:0006816; GO:0006874; GO:0005615; GO:0005771; GO:0005524; GO:0003723; GO:0006916; GO:0005509; GO:0005829; GO:0005529; GO:0005788; GO:0005789; GO:0005750; GO:0042470; GO:0005792; GO:0048471; GO:0006457; GO:0015031; GO:0001666; GO:0051208; GO:0051082; GO:0004790                                                                                                                                                                                                             | anti-apoptosis; calcium ion binding; calcium ion transport; cellular calcium ion homeostasis; extracellular space; multivesicular body; protein binding                                                                                                                                                                                                                                                                                                                                                                                                                                                                                                                                                                                                                                                                                                                                                                                                                                                                                                                                                                                                                                                                                                                                                                                                                                                                                                              | Cytoplasm              |          | Known in Uniprot to be phosphorylated | Known in HPRD to be phosphorylated |          |
| 583 THY      | THY_HUMAN    | THY; Q549C7   | P02766; Q549C7; Q61B86; Q9UB26; Q9UC99                                                                        | NP_000362                       | Transthyretin (Prealbumin) (TBPA) (TTR) (ATTR); Transthyretin (Transthyretin (Prealbumin, amyloidosis type II, isoform CDA 4) (CDNA, FLJ92322, Homo sapiens transthyretin (prealbumin, amyloidosis type II) (TTR),mRNA)                                                                                                                                                                                                                 | GO:0005179; GO:0016918; GO:0018841; GO:0005496; GO:0006050; GO:0006810; GO:0005615; GO:0015349                                                                                                                                                                                                                                                                                                                                                                                                             | hormone activity; retinal binding; binding; steroid binding; thyroid hormone generation; transport; extracellular space; hormone binding; thyroid hormone transmembrane transporter activity                                                                                                                                                                                                                                                                                                                                                                                                                                                                                                                                                                                                                                                                                                                                                                                                                                                                                                                                                                                                                                                                                                                                                                                                                                                                         | Secreted;              |          |                                       |                                    |          |
| 584 UBE2H    | UBE2H_HUMAN  | UBE2H; M4D1L5 | P52256; P37286; M4D1L5                                                                                        | NP_003335                       | Ubiquitin-conjugating enzyme E2 H (EC 6.3.2.19) (Ubiquitin-protein ligase H) (Ubiquitin carrier protein H) (Ubc2H) (E2-20K); Ubiquitin carrier protein (EC 6.3.2.-)                                                                                                                                                                                                                                                                     | GO:0042562; GO:0005739; GO:0016567; GO:0006512                                                                                                                                                                                                                                                                                                                                                                                                                                                             | mitochondrion; protein ubiquitination; regulation of protein metabolic process; ubiquitin-dependent protein catabolic process; ubiquitin-protein ligase activity; protein ubiquitination; small conjugating protein ligase activity; ubiquitin cycle                                                                                                                                                                                                                                                                                                                                                                                                                                                                                                                                                                                                                                                                                                                                                                                                                                                                                                                                                                                                                                                                                                                                                                                                                 | Endoplasmicreticulum   |          | Known in Uniprot to be phosphorylated |                                    |          |
| 585 UB2L3    | UB2L3_HUMAN  | UB2L3; B2RA47 | P68036; B2RA47; P51966; P70653; Q9HAV1                                                                        | NP_003338; NP_208709; NP_937800 | Ubiquitin-conjugating enzyme E2 L3 (EC 6.3.2.19) (Ubiquitin-protein ligase L3) (Ubiquitin carrier protein L3) (UbcH7) (E2-F1) (L-UBC)                                                                                                                                                                                                                                                                                                   | GO:0019787; GO:0005737; GO:0019899; GO:0016567; GO:0051246; GO:0000151; GO:0004842                                                                                                                                                                                                                                                                                                                                                                                                                         | ATP binding; RNA binding; anti-apoptosis; calcium ion binding; cytosol; endoplasmic reticulum lumen; endoplasmic reticulum membrane; low-density lipoprotein receptor binding; melanosome; microsome; perinuclear region of cytoplasm; protein binding; protein transport; response to hypoxia; sequestering of calcium ion; unfolded protein binding; vision binding                                                                                                                                                                                                                                                                                                                                                                                                                                                                                                                                                                                                                                                                                                                                                                                                                                                                                                                                                                                                                                                                                                | Endoplasmicreticulum   |          | Known in Uniprot to be phosphorylated |                                    |          |



| Protein Name | Uniprot Name | Other Names | Uniprot Refseq IDs   | Protein Description                                                                            | GO ID                                  | GO terms                                                                                                                                                                                                                                                                                                                                                                                          | Subcellular location                                                                                                                                                                                                                                                                                                          | Comments                                                                                                                                                                                                                                                                                                                                                                                                                                                                                                                                                                                                                                                                                                                                                                        | Comments - Database Search                                                                      | Comments - Database Search            | Function                           |
|--------------|--------------|-------------|----------------------|------------------------------------------------------------------------------------------------|----------------------------------------|---------------------------------------------------------------------------------------------------------------------------------------------------------------------------------------------------------------------------------------------------------------------------------------------------------------------------------------------------------------------------------------------------|-------------------------------------------------------------------------------------------------------------------------------------------------------------------------------------------------------------------------------------------------------------------------------------------------------------------------------|---------------------------------------------------------------------------------------------------------------------------------------------------------------------------------------------------------------------------------------------------------------------------------------------------------------------------------------------------------------------------------------------------------------------------------------------------------------------------------------------------------------------------------------------------------------------------------------------------------------------------------------------------------------------------------------------------------------------------------------------------------------------------------|-------------------------------------------------------------------------------------------------|---------------------------------------|------------------------------------|
| 600          | APOC3        | APOC3_HUMAN | APOC3, A3KPE2        | P02656; Q08E83; Q06786; A3KPE2                                                                 | NP_000031                              | <p>Apolipoprotein C-III (Apo-CIII) (ApoC-III); Apolipoprotein C-III (Apolipoprotein C-III variant 2) (Apolipoprotein C-III variant 3) (Apolipoprotein C-III, isoform CRA_a)</p>                                                                                                                                                                                                                   | <p>GO:0032488; GO:0001876; GO:0015485; GO:0005143; GO:0033344; GO:0042627; GO:0034375; GO:0034363; GO:0005102; GO:0042157; GO:0045717; GO:0051005; GO:0048261; GO:0010897; GO:0005543; GO:0033700; GO:0003456; GO:0034361; GO:0034447; GO:0005576; GO:0008289; GO:0006869</p>                                                 | <p>Cdc42 protein signal transduction; G-protein coupled receptor protein signaling pathway; cholesterol binding; cholesterol efflux; chylomicron; high-density lipoprotein particle remodeling; intermediate-density lipoprotein particle; lipase inhibitor activity; lipoprotein metabolic process; negative regulation of fatty acid biosynthetic process; negative regulation of lipoprotein lipase activity; negative regulation of receptor-mediated endocytosis; negative regulation of triglyceride catabolic process; phospholipid binding; phospholipid efflux; sphersial high-density lipoprotein particle; very-low-density lipoprotein particle; very low-density lipoprotein particle clearance; extracellular region; lipid binding; lipid transport</p>          | Secreted;                                                                                       |                                       |                                    |
| 601          | APOH         | APOH_HUMAN  | APOH                 | P02749; B2R9M1; Q9UCN7                                                                         | NP_000033                              | <p>Beta-2-glycoprotein 1 (Beta-2-glycoprotein 1) (Beta-2GPI) (B2GPI) (Apolipoprotein H) (Apo-H) (Activated protein C-binding protein) (APC inhibitor) (Anticardiolipin cofactor)</p>                                                                                                                                                                                                              | <p>GO:0007597; GO:0009986; GO:0042627; GO:0005737; GO:0034399; GO:0001948; GO:0008201; GO:0034354; GO:0060230; GO:0016525; GO:0010596; GO:0001937; GO:0031818; GO:0034392; GO:0005634; GO:0005934; GO:0031639; GO:0030194; GO:0051006; GO:0006641; GO:0034197; GO:0034361</p>                                                 | <p>blood coagulation, intrinsic pathway; cell surface; chylomicron; cytoplasm; eukaryotic cell surface binding; glycoprotein binding; heparin binding; high-density lipoprotein particle; lipoprotein lipase activator activity; negative regulation of angiogenesis; negative regulation of endothelial cell migration; negative regulation of endothelial cell proliferation; negative regulation of fibrinolysis; negative regulation of myeloid cell apoptosis; negative regulation of smooth muscle cell apoptosis; nucleus; phospholipid binding; plasminogen activation; positive regulation of blood coagulation; positive regulation of lipoprotein lipase activity; triglyceride metabolic process; triglyceride transport; very-low-density lipoprotein particle</p> | Secreted                                                                                        |                                       |                                    |
| 602          | BID          | BID_HUMAN   | BID; ABAS18          | P55957; Q549H7; Q71704; Q724M9; Q817B5; ABAS18                                                 | <p>NP_001187; NP_932070; NP_932071</p> | <p>BH3-interacting domain death agonist (p22 BID) (BID) (Cleaved into: BH3-interacting domain death agonist p15 (p15 BID); BH3-interacting domain death agonist p13 (p13 BID); BH3-interacting domain death agonist p11 (p11 BID))</p>                                                                                                                                                            | <p>GO:0008633; GO:0005013; GO:0008625; GO:0005924; GO:0005741; GO:0051402; GO:0005534; GO:0001972; GO:0005737; GO:0004802; GO:0008624; GO:0045121; GO:0007498; GO:0004715; GO:0005634; GO:0006468; GO:0008270; GO:0007186; GO:0006957; GO:0006958; GO:0004866; GO:0005915; GO:0005102</p>                                     | <p>activation of pro-apoptotic gene products; cytosol; death receptor binding; induction of apoptosis via death domain receptors; membrane fraction; mitochondrial outer membrane; neuron apoptosis; release of cytochrome c from mitochondria</p>                                                                                                                                                                                                                                                                                                                                                                                                                                                                                                                              | CytoplasmMitochondrionmembraneMitochondrionmembraneCytoplasmMitochondrionmembrane               | Known in Uniprot to be phosphorylated | Known in HPRD to be phosphorylated |
| 603          | BTX          | BTX_HUMAN   | BTX                  | Q06187; Q32ML7                                                                                 | NP_000052                              | <p>Tyrosine-protein kinase BTK (EC 2.7.10.2) (Bruton tyrosine kinase) (Agammaglobulinemia tyrosine kinase) (ATK) (B-cell progenitor kinase) (BPK)</p>                                                                                                                                                                                                                                             | <p>GO:0001972; GO:0005737; GO:0004802; GO:0008624; GO:0045121; GO:0007498; GO:0004715; GO:0005634; GO:0006468; GO:0008270; GO:0007186; GO:0006957; GO:0006958; GO:0004866; GO:0005915; GO:0005102</p>                                                                                                                         | <p>ATP binding; calcium-mediated signaling; cytoplasm; identical protein binding; induction of apoptosis via extracellular signals; membrane raft; mesoderm development; non-membrane spanning protein tyrosine kinase activity; nucleus; protein amino acid phosphorylation; zinc ion binding</p>                                                                                                                                                                                                                                                                                                                                                                                                                                                                              | CytoplasmMembranePlasma membraneNucleus                                                         | Known in Uniprot to be phosphorylated | Known in HPRD to be phosphorylated |
| 604          | CO3          | CO3_HUMAN   | CO3; A7E236          | P01024; A7E236                                                                                 | NP_000055                              | <p>Complement C3 (C3 and PZP-like alpha-2-macroglobulin domain-containing protein 1) (Cleaved into: Complement C3 beta chain; Complement C3 alpha chain; C3a anaphylatoxin; Complement C3b alpha' chain; Complement C3c alpha' chain fragment 1; Complement C3dg fragment; Complement C3g fragment; Complement C3d fragment; Complement C3f fragment; Complement C3c alpha' chain fragment 2)</p> | <p>GO:0004089; GO:0005737; GO:0005634; GO:0006730; GO:0004122; GO:0006535; GO:0019341; GO:0005829; GO:0005506; GO:0005730; GO:0003131; GO:0005905; GO:0005905; GO:0005829; GO:0006886; GO:0005515; GO:0008565; GO:0005690; GO:0030121; GO:0005905; GO:0005829; GO:0006886; GO:0005515; GO:0008565; GO:0006898</p>             | <p>G-protein coupled receptor protein signaling pathway; complement activation, alternative pathway; complement activation, classical pathway; endopeptidase inhibitor activity; extracellular space; receptor binding</p>                                                                                                                                                                                                                                                                                                                                                                                                                                                                                                                                                      | Secreted                                                                                        | Known in Uniprot to be phosphorylated |                                    |
| 605          | CAH2         | CAH2_HUMAN  | CAH2; B2R7G8         | P00918; Q6F112; Q6E793; B2R7G8                                                                 | NP_000058                              | <p>Carbonic anhydrase 2 (EC 4.2.1.1) (Carbonic anhydrase II) (CA-II) (Carbonate dehydratase II) (Carbonic dehydrase C) (CAC)</p>                                                                                                                                                                                                                                                                  | <p>GO:0004089; GO:0005737; GO:0005634; GO:0006730; GO:0004122; GO:0006535; GO:0019341; GO:0005829; GO:0005506; GO:0005730; GO:0003131; GO:0005905; GO:0005905; GO:0005829; GO:0006886; GO:0005515; GO:0008565; GO:0006898</p>                                                                                                 | <p>carbonate dehydratase activity; cytoplasm; nucleus; one-carbon compound metabolic process; zinc ion binding</p>                                                                                                                                                                                                                                                                                                                                                                                                                                                                                                                                                                                                                                                              | Cytoplasm                                                                                       |                                       |                                    |
| 606          | CBS          | CBS_HUMAN   | CBS; B2R993          | P35520; Q99425; Q9RWC5; B2R993                                                                 | NP_000062                              | <p>Cystathionine beta-synthase (EC 4.2.1.22) (Serrine sulfhydrylase) (Beta-thionase)</p>                                                                                                                                                                                                                                                                                                          | <p>GO:0004122; GO:0006535; GO:0019341; GO:0005829; GO:0005506; GO:0005730; GO:0003131; GO:0005905; GO:0005905; GO:0005829; GO:0006886; GO:0005515; GO:0008565; GO:0006898</p>                                                                                                                                                 | <p>cystathionine beta-synthase activity; cysteine biosynthetic process from serine; cysteine biosynthetic process via cystathionine; cytosol; iron ion binding; nucleus; pyridoxal phosphate binding</p>                                                                                                                                                                                                                                                                                                                                                                                                                                                                                                                                                                        | CytoplasmNucleus                                                                                |                                       |                                    |
| 607          | AP2B1        | AP2B1_HUMAN | AP2B1                | P63010; B2R9P3; P18511; Q96119                                                                 | <p>NP_001273; NP_001025</p>            | <p>AP-2 complex subunit beta-1 (Adapter-related protein complex 2 beta-1 subunit) (Beta2-adaptin) (Beta-adaptin) (Pleiosin membrane adaptor HAZ/AP2 adaptor beta subunit) (Clathrin assembly protein complex 2 beta large chain) (AP105B)</p>                                                                                                                                                     | <p>GO:0003131; GO:0005905; GO:0005829; GO:0006886; GO:0005515; GO:0008565; GO:0006898</p>                                                                                                                                                                                                                                     | <p>clathrin adaptor complex; coated pit; cytosol; intracellular protein transport; protein binding; protein transporter activity; regulation of defense response to virus by virus; vesicle-mediated transport</p>                                                                                                                                                                                                                                                                                                                                                                                                                                                                                                                                                              | CellmembraneMembranenecroticdephosphorylatedmembraneproteinCytoplasmicacid                      | Known in Uniprot to be phosphorylated |                                    |
| 608          | AP1S1        | AP1S1_HUMAN | AP1S1; B2R5D8        | P61966; R82267; Q00382; Q31923; Q9B7M4; Q9LWD9; B2R5D8                                         | NP_001274                              | <p>AP-1 complex subunit sigma-1A (Adapter-related protein complex 1 sigma-1A subunit) (Adapter protein complex AP-1 sigma-1A subunit) (Sigma-1A subunit 1A) (Sigma1A-adaptin) (Golg1 adaptor HAI/AP1 adaptor sigma-1A subunit) (HAI 19 kDa subunit) (Clathrin assembly protein complex 1 sigma-1A small chain) (Clathrin coat assembly protein AP19) (Sigma 1a subunit of AP-1 clathrin)</p>      | <p>GO:0003131; GO:0005905; GO:0005829; GO:0006886; GO:0005515; GO:0008565; GO:0006898</p>                                                                                                                                                                                                                                     | <p>AP-1 adaptor complex; coated pit; cytosol; intracellular protein transport; protein binding; protein transporter activity; receptor-mediated endocytosis</p>                                                                                                                                                                                                                                                                                                                                                                                                                                                                                                                                                                                                                 | GolgiapparatusCytoplasmicvesiclemembraneproteinperipheralmembraneproteinmembranecytoplasmicacid | Known in Uniprot to be phosphorylated |                                    |
| 609          | CERU         | CERU_HUMAN  | CERU; ASPL27         | P00450; Q14063; Q2P918; Q9UKS4; ASPL27                                                         | NP_000087                              | <p>Ceruloplasmin (EC 1.16.3.1) (Ferroxidase)</p>                                                                                                                                                                                                                                                                                                                                                  | <p>GO:0008879; GO:0005507; GO:0006825; GO:0005615; GO:0004322; GO:0005514; GO:0005783; GO:0005915; GO:0006936; GO:0007517; GO:0005637; GO:0005515; GO:0005635; GO:0031468; GO:0005819; GO:0005737; GO:0008544; GO:0006920; GO:0006920; GO:0005504; GO:0006920; GO:0005515; GO:0006810; GO:0005975; GO:0004369; GO:0004553</p> | <p>cellular iron ion homeostasis; copper ion binding; copper ion transport; extracellular space; ferroxidase activity; oxidation reduction</p>                                                                                                                                                                                                                                                                                                                                                                                                                                                                                                                                                                                                                                  | Secreted                                                                                        | Known in Uniprot to be phosphorylated |                                    |
| 610          | EMD          | EMD_HUMAN   | EMD; Q6F102          | P50402; Q6F102                                                                                 | NP_000108                              | <p>Emerin; EMD protein (Emerin) (Emerin (Emery-Dreifuss muscular dystrophy), isoform CRA_a)</p>                                                                                                                                                                                                                                                                                                   | <p>GO:0005783; GO:0005915; GO:0006936; GO:0007517; GO:0005637; GO:0005515; GO:0005635; GO:0031468; GO:0005819; GO:0005737; GO:0008544; GO:0006920; GO:0006920; GO:0005504; GO:0006920; GO:0005515; GO:0006810; GO:0005975; GO:0004369; GO:0004553</p>                                                                         | <p>endoplasmic reticulum; integral to membrane; muscle contraction; muscle organ development; nuclear inner membrane; protein binding; nuclear envelope; nuclear envelope reassembly; spindle</p>                                                                                                                                                                                                                                                                                                                                                                                                                                                                                                                                                                               | NucleusinnermembranenecroticdephosphorylatedmembraneproteinCytoplasmicacid                      | Known in Uniprot to be phosphorylated | Known in HPRD to be phosphorylated |
| 611          | FABPE        | FABPE_HUMAN | FABPE; FABP5; B2R4K0 | Q01469; B2R4K0                                                                                 | NP_001435                              | <p>Fatty acid-binding protein, epidermal (E-FABP) (Fatty acid-binding protein 5) (Psoriasis-associated 57; fatty acid-binding protein homolog) (FA-FABP)</p>                                                                                                                                                                                                                                      | <p>GO:0005737; GO:0005504; GO:0006920; GO:0005515; GO:0006810; GO:0005975; GO:0004369; GO:0004553</p>                                                                                                                                                                                                                         | <p>cytoplasm; epidermis development; fatty acid binding; lipid metabolic process; protein binding; transport; transporter activity</p>                                                                                                                                                                                                                                                                                                                                                                                                                                                                                                                                                                                                                                          | Cytoplasm                                                                                       | Known in Uniprot to be phosphorylated |                                    |
| 612          | GLGB         | GLGB_HUMAN  | Q59E70; GLGB; B3KWV3 | Q59E70; Q04446; Q59E70; B3KWV3                                                                 | NP_000149                              | <p>Glucan, branching enzyme 1 variant (Fragment)</p>                                                                                                                                                                                                                                                                                                                                              | <p>GO:0005975; GO:0004369; GO:0004553</p>                                                                                                                                                                                                                                                                                     | <p>carbohydrate metabolic process; cation binding; hydrolase activity, hydrolyzing O-2-alkoxy compounds</p>                                                                                                                                                                                                                                                                                                                                                                                                                                                                                                                                                                                                                                                                     | Known in Uniprot to be phosphorylated                                                           |                                       |                                    |
| 613          | ITA6         | ITA6_HUMAN  | ITA6; Q3X8X7         | P22229; B2RMU9; B4D6G9; B4D6X8; Q08443; Q0MRC7; Q14644; Q16508; Q53R37; Q59H67; Q86VL6; Q9LND3 | <p>NP_000201; NP_001073</p>            | <p>Integrin alpha-6 (VLA-6) (CD49 antigen-like family member F) (CD antigen CD49F) (Cleaved into: Integrin alpha-6 heavy chain; Integrin alpha-6 light chain)</p>                                                                                                                                                                                                                                 | <p>GO:0005909; GO:0007155; GO:0007044; GO:0008305; GO:0007229; GO:0005515; GO:0004872</p>                                                                                                                                                                                                                                     | <p>calcium ion binding; cell adhesion; cell-substrate junction assembly; integrin complex; integrin-mediated signaling pathway; protein binding; receptor activity</p>                                                                                                                                                                                                                                                                                                                                                                                                                                                                                                                                                                                                          | MembraneSinglepassy proteinmembraneprotein                                                      | Known in Uniprot to be phosphorylated |                                    |
| 614          | K1C17        | K1C17_HUMAN | K1C17                | Q04695; A521M9; A521N0; A521N1; A521N2; A6N0V5; A6NKQ2; Q61P98; Q8L1P6                         | NP_000413                              | <p>Keratin, type I cytoskeletal 17 (Cytokeratin-17) (CK-17) (Keratin-17) (K17) (39.1)</p>                                                                                                                                                                                                                                                                                                         | <p>GO:0005737; GO:0008544; GO:0005882; GO:0005634; GO:0005515; GO:0005200</p>                                                                                                                                                                                                                                                 | <p>cytoplasm; epidermis development; intermediate filament; nucleus; protein binding; structural constituent of cytoskeleton</p>                                                                                                                                                                                                                                                                                                                                                                                                                                                                                                                                                                                                                                                | Cytoplasm                                                                                       | Known in Uniprot to be phosphorylated |                                    |
| 615          | MYH7         | MYH7_HUMAN  | MYH7; A2ZD86         | P12883; Q14836; Q14837; Q14904; Q16579; Q2M1V6; Q92679; Q9H1D5; Q9JMM6; A2ZD86                 | NP_000248                              | <p>Myosin-7 (Myosin heavy chain 7) (Myosin heavy chain, cardiac muscle beta isoform) (MYHC-beta) (Myosin heavy chain slow isoform) (MYHC-slow); Myosin, heavy chain 7, cardiac muscle, beta (Myosin, heavy polypeptide 7, cardiac muscle, beta, isoform CRA_b)</p>                                                                                                                                | <p>GO:0005524; GO:0006200; GO:0003779; GO:0030898; GO:0007512; GO:0005516; GO:0005925; GO:0000146; GO:0030049; GO:0005730; GO:0002027; GO:0006941; GO:0005863; GO:0008307; GO:0005510; GO:0003774</p>                                                                                                                         | <p>ATP binding; ATP catabolic process; actin binding; actin-dependent ATPase activity; adult heart development; neurotrodin binding; focal adhesion; microfilament motor activity; muscle filament sliding; nucleus; regulation of heart rate; striated muscle contraction; striated muscle thick filament; structural constituent of muscle; ventricular cardiac muscle morphogenesis; motor activity</p>                                                                                                                                                                                                                                                                                                                                                                      | Cytoplasmmyofibril;                                                                             | Known in Uniprot to be phosphorylated |                                    |

| Protein Name | Uniprot Name | Other Names                 | Uniprot ID                                                             | Refseq IDs           | Protein Description                                                                                                                                                                                                                                                                | GO ID                                                                                                                                                                                                                                                                                                                                                                                                                                                                                                                                                                                                                                                                                                                                                                                                                                                                                                                                                                                                                                                                                                                                                                                                                                                                                                                                                                                                                                                                                                                                                                                                                                                                               | GO terms                                                                                                                                                                                                                                                                                                                                                                                                                                                     | Subcellular location                | Comments | Comments                              | Comments - Database Search         | Comments - Database Search | Function |
|--------------|--------------|-----------------------------|------------------------------------------------------------------------|----------------------|------------------------------------------------------------------------------------------------------------------------------------------------------------------------------------------------------------------------------------------------------------------------------------|-------------------------------------------------------------------------------------------------------------------------------------------------------------------------------------------------------------------------------------------------------------------------------------------------------------------------------------------------------------------------------------------------------------------------------------------------------------------------------------------------------------------------------------------------------------------------------------------------------------------------------------------------------------------------------------------------------------------------------------------------------------------------------------------------------------------------------------------------------------------------------------------------------------------------------------------------------------------------------------------------------------------------------------------------------------------------------------------------------------------------------------------------------------------------------------------------------------------------------------------------------------------------------------------------------------------------------------------------------------------------------------------------------------------------------------------------------------------------------------------------------------------------------------------------------------------------------------------------------------------------------------------------------------------------------------|--------------------------------------------------------------------------------------------------------------------------------------------------------------------------------------------------------------------------------------------------------------------------------------------------------------------------------------------------------------------------------------------------------------------------------------------------------------|-------------------------------------|----------|---------------------------------------|------------------------------------|----------------------------|----------|
| 616 NDKA     | NDKA_HUMAN   | NDKA; Q6FGK3; Q6GK3; Q8QXQ2 | P15831; Q6FGK3; Q6GK3; Q8QXQ2                                          | NP_000260; NP_937818 | Nucleoside diphosphate kinase A (NDP kinase A) (NDK A) (EC 2.7.4.6) (Tumor metastatic process-associated protein) (Metastasis inhibition factor nm23) (Int023-H1) (Cranszyme A-activated DNase) (GAAD)                                                                             | GO:000524; GO:0006241; GO:0003677; GO:0005025; GO:0006183; GO:0006228; GO:0005737; GO:0004536; GO:0042802; GO:0002877; GO:0045786; GO:0008285; GO:0004550; GO:0005634; GO:0043388; GO:0050679; GO:0042981                                                                                                                                                                                                                                                                                                                                                                                                                                                                                                                                                                                                                                                                                                                                                                                                                                                                                                                                                                                                                                                                                                                                                                                                                                                                                                                                                                                                                                                                           | ATP binding; CTP biosynthetic process; DNA binding; GTP binding; GTP biosynthetic process; UTP biosynthetic process; cytoplasm; deoxynucleoside activity; identical protein binding; magnesium ion binding; negative regulation of cell cycle; negative regulation of cell proliferation; nucleoside diphosphate kinase activity; nucleus; positive regulation of DNA binding; positive regulation of epithelial cell proliferation; regulation of apoptosis | Cytoplasm;Nucleus                   |          | Known in Uniprot to be phosphorylated | Known in HPRD to be phosphorylated | Kinase                     |          |
| 617 PNPH     | PNPH_HUMAN   | PNPH                        | P00491; B2R8S5; Q15160; Q5P203                                         | NP_000261            | Purine nucleoside phosphorylase (PNP) (EC 2.4.2.1) (thiosine phosphorylase)                                                                                                                                                                                                        | GO:0034256; GO:0008039; GO:0008144; GO:0006955; GO:0006148; GO:0006738; GO:0001882; GO:0042301; GO:0042102; GO:0046636; GO:0002060; GO:0004731; GO:0042493; GO:0006879; GO:0030139; GO:0008199; GO:0005739; GO:0006953; GO:0016324; GO:0005094; GO:0006879; GO:0005905; GO:0016033; GO:0005768; GO:0005615; GO:0015682; GO:0031643; GO:0001666; GO:0008544; GO:0005995; GO:0005515; GO:0001698; GO:0001983; GO:0042742; GO:0005615; GO:0006954; GO:0003796; GO:0005737; GO:0031012; GO:0007917; GO:0005886; GO:0006470; GO:0004772; GO:0005939; GO:0005737; GO:0042802; GO:0047476; GO:0006470; GO:0003677; GO:0008630; GO:0005060; GO:0045454; GO:0009055; GO:0005738; GO:0005634; GO:005514; GO:0016491; GO:0005096; GO:0005099; GO:0007266; GO:0006916; GO:0009026; GO:0005737; GO:0005856; GO:0042802; GO:0007162; GO:0005094; GO:0005737; GO:0005096; GO:0007165; GO:0005625; GO:0007601; GO:00015992; GO:0016471; GO:0008553; GO:0005765; GO:0005515; GO:00015992; GO:0005737; GO:0016021; GO:0005634; GO:0003677; GO:0042824; GO:0005081; GO:0005509; GO:0007050; GO:0051087; GO:0001849; GO:0005829; GO:0005788; GO:0042921; GO:0005178; GO:0003729; GO:0045665; GO:0031444; GO:0000122; GO:0017148; GO:0005634; GO:0002502; GO:0048471; GO:0005844; GO:0045740; GO:0045740; GO:0045787; GO:0050766; GO:0006611; GO:0022417; GO:0050821; GO:0005578; GO:0042981; GO:0010149; GO:0051208; GO:0005039; GO:0016564; GO:0001087; GO:0000882; GO:0048102; GO:0007050; GO:0004861; GO:0005829; GO:0006137; GO:0003038; GO:0008285; GO:0042126; GO:0005634; GO:0005515; GO:0000079; GO:0005072; GO:0007050; GO:0016301; GO:0003779; GO:0031032; GO:0005516; GO:0005911; GO:0005856 | NAD biosynthesis via nicotinamide riboside salvage pathway; cytosol; drug binding; immune response; inosine catabolic process; nicotinamide riboside catabolic process; nucleoside binding; phosphate binding; positive regulation of T cell proliferation; positive regulation of alpha-beta T cell differentiation; purine binding; purine-nucleoside phosphorylase activity; response to drug; urate biosynthetic process                                 |                                     |          | Known in Uniprot to be phosphorylated | Known in HPRD to be phosphorylated | Kinase                     |          |
| 618 TRFE     | TRFE_HUMAN   | TRFE; Q1HBA5                | P02787; Q43890; Q9ICB8; Q9UHV0; Q1HBA5                                 | NP_001054            | Serotransferrin (Transferrin) (Siderophilin) (Beta-1 metal-binding globulin); Transferrin (Transferrin, isoform CRA_d)                                                                                                                                                             | GO:0006879; GO:0030139; GO:0008199; GO:0005739; GO:0006953; GO:0016324; GO:0005094; GO:0006879; GO:0005905; GO:0016033; GO:0005768; GO:0005615; GO:0015682; GO:0031643; GO:0001666; GO:0008544; GO:0005995; GO:0005515; GO:0001698; GO:0001983; GO:0042742; GO:0005615; GO:0006954; GO:0003796; GO:0005737; GO:0031012; GO:0007917; GO:0005886; GO:0006470; GO:0004772; GO:0005939; GO:0005737; GO:0042802; GO:0047476; GO:0006470; GO:0003677; GO:0008630; GO:0005060; GO:0045454; GO:0009055; GO:0005738; GO:0005634; GO:005514; GO:0016491; GO:0005096; GO:0005099; GO:0007266; GO:0006916; GO:0009026; GO:0005737; GO:0005856; GO:0042802; GO:0007162; GO:0005094; GO:0005737; GO:0005096; GO:0007165; GO:0005625; GO:0007601; GO:00015992; GO:0016471; GO:0008553; GO:0005765; GO:0005515; GO:00015992; GO:0005737; GO:0016021; GO:0005634; GO:0003677; GO:0042824; GO:0005081; GO:0005509; GO:0007050; GO:0051087; GO:0001849; GO:0005829; GO:0005788; GO:0042921; GO:0005178; GO:0003729; GO:0045665; GO:0031444; GO:0000122; GO:0017148; GO:0005634; GO:0002502; GO:0048471; GO:0005844; GO:0045740; GO:0045740; GO:0045787; GO:0050766; GO:0006611; GO:0022417; GO:0050821; GO:0005578; GO:0042981; GO:0010149; GO:0051208; GO:0005039; GO:0016564; GO:0001087; GO:0000882; GO:0048102; GO:0007050; GO:0004861; GO:0005829; GO:0006137; GO:0003038; GO:0008285; GO:0042126; GO:0005634; GO:0005515; GO:0000079; GO:0005072; GO:0007050; GO:0016301; GO:0003779; GO:0031032; GO:0005516; GO:0005911; GO:0005856                                                                                                                                                             | cellular iron ion homeostasis; endocytic vesicle; ferric iron binding; mitochondrion; acute-phase response; apical plasma membrane; basement membrane; cellular iron ion homeostasis; coated pit; cytoplasmic membrane-bounded vesicle; endosome; extracellular space; ferric iron transmembrane transporter activity; ferric iron transport; positive regulation of myelination; response to hypoxia; response to organic cyclic substance                  | Secreted;                           |          | Known in Uniprot to be phosphorylated | Known in HPRD to be phosphorylated | Kinase                     |          |
| 619 K2C5     | K2C5_HUMAN   | K2C5                        | P13647; Q68771; Q6UBJ0; Q8TA91; P15126; P00695; Q13170; Q9UC78; B2R4C5 | NP_000415            | Keratin, type II cytoskeletal 5 (Cytokeratin-5) (Ck-5) (Keratin-5) (K5) (58 kDa cytokeratin)                                                                                                                                                                                       | GO:0008544; GO:0005995; GO:0005515; GO:0001698; GO:0001983; GO:0042742; GO:0005615; GO:0006954; GO:0003796; GO:0005737; GO:0031012; GO:0007917; GO:0005886; GO:0006470; GO:0004772; GO:0005939; GO:0005737; GO:0042802; GO:0047476; GO:0006470; GO:0003677; GO:0008630; GO:0005060; GO:0045454; GO:0009055; GO:0005738; GO:0005634; GO:005514; GO:0016491; GO:0005096; GO:0005099; GO:0007266; GO:0006916; GO:0009026; GO:0005737; GO:0005856; GO:0042802; GO:0007162; GO:0005094; GO:0005737; GO:0005096; GO:0007165; GO:0005625; GO:0007601; GO:00015992; GO:0016471; GO:0008553; GO:0005765; GO:0005515; GO:00015992; GO:0005737; GO:0016021; GO:0005634; GO:0003677; GO:0042824; GO:0005081; GO:0005509; GO:0007050; GO:0051087; GO:0001849; GO:0005829; GO:0005788; GO:0042921; GO:0005178; GO:0003729; GO:0045665; GO:0031444; GO:0000122; GO:0017148; GO:0005634; GO:0002502; GO:0048471; GO:0005844; GO:0045740; GO:0045740; GO:0045787; GO:0050766; GO:0006611; GO:0022417; GO:0050821; GO:0005578; GO:0042981; GO:0010149; GO:0051208; GO:0005039; GO:0016564; GO:0001087; GO:0000882; GO:0048102; GO:0007050; GO:0004861; GO:0005829; GO:0006137; GO:0003038; GO:0008285; GO:0042126; GO:0005634; GO:0005515; GO:0000079; GO:0005072; GO:0007050; GO:0016301; GO:0003779; GO:0031032; GO:0005516; GO:0005911; GO:0005856                                                                                                                                                                                                                                                                                                                                                 | epidermis development; keratin filament; protein binding; structural constituent of cytoskeleton                                                                                                                                                                                                                                                                                                                                                             |                                     |          | Known in Uniprot to be phosphorylated | Known in HPRD to be phosphorylated | Kinase                     |          |
| 620 LYSC     | LYSC_HUMAN   | LYSC; B2R4C5                | P15126; P00695; Q13170; Q9UC78; B2R4C5                                 | NP_000230            | Lysozyme C (EC 3.2.1.17) (1,4-beta-N-acetylmuramidase C)                                                                                                                                                                                                                           | GO:001698; GO:0001983; GO:0042742; GO:0005615; GO:0006954; GO:0003796; GO:0005737; GO:0031012; GO:0007917; GO:0005886; GO:0006470; GO:0004772; GO:0005939; GO:0005737; GO:0042802; GO:0047476; GO:0006470; GO:0003677; GO:0008630; GO:0005060; GO:0045454; GO:0009055; GO:0005738; GO:0005634; GO:005514; GO:0016491; GO:0005096; GO:0005099; GO:0007266; GO:0006916; GO:0009026; GO:0005737; GO:0005856; GO:0042802; GO:0007162; GO:0005094; GO:0005737; GO:0005096; GO:0007165; GO:0005625; GO:0007601; GO:00015992; GO:0016471; GO:0008553; GO:0005765; GO:0005515; GO:00015992; GO:0005737; GO:0016021; GO:0005634; GO:0003677; GO:0042824; GO:0005081; GO:0005509; GO:0007050; GO:0051087; GO:0001849; GO:0005829; GO:0005788; GO:0042921; GO:0005178; GO:0003729; GO:0045665; GO:0031444; GO:0000122; GO:0017148; GO:0005634; GO:0002502; GO:0048471; GO:0005844; GO:0045740; GO:0045740; GO:0045787; GO:0050766; GO:0006611; GO:0022417; GO:0050821; GO:0005578; GO:0042981; GO:0010149; GO:0051208; GO:0005039; GO:0016564; GO:0001087; GO:0000882; GO:0048102; GO:0007050; GO:0004861; GO:0005829; GO:0006137; GO:0003038; GO:0008285; GO:0042126; GO:0005634; GO:0005515; GO:0000079; GO:0005072; GO:0007050; GO:0016301; GO:0003779; GO:0031032; GO:0005516; GO:0005911; GO:0005856                                                                                                                                                                                                                                                                                                                                                                                      | cell wall catabolic process; cytotoxicity; defense response to bacterium; extracellular space; inflammatory response; lysosyme activity; protein binding                                                                                                                                                                                                                                                                                                     |                                     |          | Known in Uniprot to be phosphorylated | Known in HPRD to be phosphorylated | Kinase                     |          |
| 621 MTM1     | MTM1_HUMAN   | MTM1                        | Q11496; Q8NEL1                                                         | NP_000243            | Myotubularin (EC 3.1.1.48)                                                                                                                                                                                                                                                         | GO:0003677; GO:0008630; GO:0005060; GO:0045454; GO:0009055; GO:0005738; GO:0005634; GO:005514; GO:0016491; GO:0005096; GO:0005099; GO:0007266; GO:0006916; GO:0009026; GO:0005737; GO:0005856; GO:0042802; GO:0007162; GO:0005094; GO:0005737; GO:0005096; GO:0007165; GO:0005625; GO:0007601; GO:00015992; GO:0016471; GO:0008553; GO:0005765; GO:0005515; GO:00015992; GO:0005737; GO:0016021; GO:0005634; GO:0003677; GO:0042824; GO:0005081; GO:0005509; GO:0007050; GO:0051087; GO:0001849; GO:0005829; GO:0005788; GO:0042921; GO:0005178; GO:0003729; GO:0045665; GO:0031444; GO:0000122; GO:0017148; GO:0005634; GO:0002502; GO:0048471; GO:0005844; GO:0045740; GO:0045740; GO:0045787; GO:0050766; GO:0006611; GO:0022417; GO:0050821; GO:0005578; GO:0042981; GO:0010149; GO:0051208; GO:0005039; GO:0016564; GO:0001087; GO:0000882; GO:0048102; GO:0007050; GO:0004861; GO:0005829; GO:0006137; GO:0003038; GO:0008285; GO:0042126; GO:0005634; GO:0005515; GO:0000079; GO:0005072; GO:0007050; GO:0016301; GO:0003779; GO:0031032; GO:0005516; GO:0005911; GO:0005856                                                                                                                                                                                                                                                                                                                                                                                                                                                                                                                                                                                                 | cytoplasm; extracellular matrix; muscle organ development; plasma membrane; protein amino acid dephosphorylation; protein serine/threonine phosphatase activity; protein tyrosine phosphatase activity                                                                                                                                                                                                                                                       |                                     |          | Known in Uniprot to be phosphorylated | Known in HPRD to be phosphorylated | Kinase                     |          |
| 622 PPAC     | PPAC_HUMAN   | PPAC; Q53RU0; Q59EH3        | P24666; Q53RU0; P24667; Q16035; Q16036; Q16725; Q3KQX8; Q59EH3         | NP_000930            | Low molecular weight phosphotyrosine protein phosphatase (LMW-PTase) (LMW-PTP) (EC 3.1.3.48) (Low molecular weight cytosolic acid phosphatase) (EC 3.1.3.2) (Red cell acid phosphatase 1) (Adipocyte acid phosphatase)                                                             | GO:0003677; GO:0008630; GO:0005060; GO:0045454; GO:0009055; GO:0005738; GO:0005634; GO:005514; GO:0016491; GO:0005096; GO:0005099; GO:0007266; GO:0006916; GO:0009026; GO:0005737; GO:0005856; GO:0042802; GO:0007162; GO:0005094; GO:0005737; GO:0005096; GO:0007165; GO:0005625; GO:0007601; GO:00015992; GO:0016471; GO:0008553; GO:0005765; GO:0005515; GO:00015992; GO:0005737; GO:0016021; GO:0005634; GO:0003677; GO:0042824; GO:0005081; GO:0005509; GO:0007050; GO:0051087; GO:0001849; GO:0005829; GO:0005788; GO:0042921; GO:0005178; GO:0003729; GO:0045665; GO:0031444; GO:0000122; GO:0017148; GO:0005634; GO:0002502; GO:0048471; GO:0005844; GO:0045740; GO:0045740; GO:0045787; GO:0050766; GO:0006611; GO:0022417; GO:0050821; GO:0005578; GO:0042981; GO:0010149; GO:0051208; GO:0005039; GO:0016564; GO:0001087; GO:0000882; GO:0048102; GO:0007050; GO:0004861; GO:0005829; GO:0006137; GO:0003038; GO:0008285; GO:0042126; GO:0005634; GO:0005515; GO:0000079; GO:0005072; GO:0007050; GO:0016301; GO:0003779; GO:0031032; GO:0005516; GO:0005911; GO:0005856                                                                                                                                                                                                                                                                                                                                                                                                                                                                                                                                                                                                 | acid phosphatase activity; cytoplasm; identical protein binding; non-membrane spanning protein tyrosine phosphatase activity; protein amino acid dephosphorylation; soluble fraction                                                                                                                                                                                                                                                                         | Cytoplasm                           |          | Known in Uniprot to be phosphorylated | Known in HPRD to be phosphorylated | Kinase                     |          |
| 623 AIFM1    | AIFM1_HUMAN  | AIFM1; A4QP84               | Q95831; B2R808; Q51JZ7; Q619V6; Q9Y313; Q9Y314; A4QP84                 | NP_004199; NP_665811 | Apoptosis-inducing factor 1, mitochondrial (EC 1.-.-) (Programmed cell death protein 8)                                                                                                                                                                                            | GO:0003677; GO:0008630; GO:0005060; GO:0045454; GO:0009055; GO:0005738; GO:0005634; GO:005514; GO:0016491; GO:0005096; GO:0005099; GO:0007266; GO:0006916; GO:0009026; GO:0005737; GO:0005856; GO:0042802; GO:0007162; GO:0005094; GO:0005737; GO:0005096; GO:0007165; GO:0005625; GO:0007601; GO:00015992; GO:0016471; GO:0008553; GO:0005765; GO:0005515; GO:00015992; GO:0005737; GO:0016021; GO:0005634; GO:0003677; GO:0042824; GO:0005081; GO:0005509; GO:0007050; GO:0051087; GO:0001849; GO:0005829; GO:0005788; GO:0042921; GO:0005178; GO:0003729; GO:0045665; GO:0031444; GO:0000122; GO:0017148; GO:0005634; GO:0002502; GO:0048471; GO:0005844; GO:0045740; GO:0045740; GO:0045787; GO:0050766; GO:0006611; GO:0022417; GO:0050821; GO:0005578; GO:0042981; GO:0010149; GO:0051208; GO:0005039; GO:0016564; GO:0001087; GO:0000882; GO:0048102; GO:0007050; GO:0004861; GO:0005829; GO:0006137; GO:0003038; GO:0008285; GO:0042126; GO:0005634; GO:0005515; GO:0000079; GO:0005072; GO:0007050; GO:0016301; GO:0003779; GO:0031032; GO:0005516; GO:0005911; GO:0005856                                                                                                                                                                                                                                                                                                                                                                                                                                                                                                                                                                                                 | DNA binding; DNA damage response; signal transduction resulting in induction of apoptosis; DNA fragmentation involved in apoptosis; FAD binding; cell redox homeostasis; electron carrier activity; mitochondrial intermembrane space; nucleus; oxidation reduction; oxidoreductase activity; protein binding                                                                                                                                                | Mitochondrion;intermembrane;Nucleus |          | Known in Uniprot to be phosphorylated | Known in HPRD to be phosphorylated | Kinase                     |          |
| 624 GDIR     | GDIR_HUMAN   | GDIR; Q61BM5; GDIR1         | P52565; Q61BM5                                                         | NP_004300            | Rho GDP-dissociation inhibitor 1 (Rho GDI 1) (Rho GDI alpha); ARHGAP2A protein (Rho GDP dissociation inhibitor (GDI) alpha) (Rho GDP dissociation inhibitor (GDI) alpha, isoform CRA_a)                                                                                            | GO:0005096; GO:0005099; GO:0007266; GO:0006916; GO:0009026; GO:0005737; GO:0005856; GO:0042802; GO:0007162; GO:0005094; GO:0005737; GO:0005096; GO:0007165; GO:0005625; GO:0007601; GO:00015992; GO:0016471; GO:0008553; GO:0005765; GO:0005515; GO:00015992; GO:0005737; GO:0016021; GO:0005634; GO:0003677; GO:0042824; GO:0005081; GO:0005509; GO:0007050; GO:0051087; GO:0001849; GO:0005829; GO:0005788; GO:0042921; GO:0005178; GO:0003729; GO:0045665; GO:0031444; GO:0000122; GO:0017148; GO:0005634; GO:0002502; GO:0048471; GO:0005844; GO:0045740; GO:0045740; GO:0045787; GO:0050766; GO:0006611; GO:0022417; GO:0050821; GO:0005578; GO:0042981; GO:0010149; GO:0051208; GO:0005039; GO:0016564; GO:0001087; GO:0000882; GO:0048102; GO:0007050; GO:0004861; GO:0005829; GO:0006137; GO:0003038; GO:0008285; GO:0042126; GO:0005634; GO:0005515; GO:0000079; GO:0005072; GO:0007050; GO:0016301; GO:0003779; GO:0031032; GO:0005516; GO:0005911; GO:0005856                                                                                                                                                                                                                                                                                                                                                                                                                                                                                                                                                                                                                                                                                                            | GTPase activator activity; Rho GDP-dissociation inhibitor activity; Rho protein signal transduction; anti-apoptosis; cell motion; cytoplasm; cytoskeleton; identical protein binding; negative regulation of cell adhesion; Rho GDP-dissociation inhibitor activity                                                                                                                                                                                          | Cytoplasm;                          |          | Known in Uniprot to be phosphorylated | Known in HPRD to be phosphorylated | Kinase                     |          |
| 625 ARRC     | ARRC_HUMAN   | ARRC                        | P36575; B58089; Q51723; Q51724; Q619V6; Q96EN2                         | NP_004303            | Arrestin-C (Cone arrestin) (C-arrestin) (cArr) (Retinal cone arrestin-3) (X-arrestin)                                                                                                                                                                                              | GO:0003677; GO:0008630; GO:0005060; GO:0045454; GO:0009055; GO:0005738; GO:0005634; GO:005514; GO:0016491; GO:0005096; GO:0005099; GO:0007266; GO:0006916; GO:0009026; GO:0005737; GO:0005856; GO:0042802; GO:0007162; GO:0005094; GO:0005737; GO:0005096; GO:0007165; GO:0005625; GO:0007601; GO:00015992; GO:0016471; GO:0008553; GO:0005765; GO:0005515; GO:00015992; GO:0005737; GO:0016021; GO:0005634; GO:0003677; GO:0042824; GO:0005081; GO:0005509; GO:0007050; GO:0051087; GO:0001849; GO:0005829; GO:0005788; GO:0042921; GO:0005178; GO:0003729; GO:0045665; GO:0031444; GO:0000122; GO:0017148; GO:0005634; GO:0002502; GO:0048471; GO:0005844; GO:0045740; GO:0045740; GO:0045787; GO:0050766; GO:0006611; GO:0022417; GO:0050821; GO:0005578; GO:0042981; GO:0010149; GO:0051208; GO:0005039; GO:0016564; GO:0001087; GO:0000882; GO:0048102; GO:0007050; GO:0004861; GO:0005829; GO:0006137; GO:0003038; GO:0008285; GO:0042126; GO:0005634; GO:0005515; GO:0000079; GO:0005072; GO:0007050; GO:0016301; GO:0003779; GO:0031032; GO:0005516; GO:0005911; GO:0005856                                                                                                                                                                                                                                                                                                                                                                                                                                                                                                                                                                                                 | cytoplasm; response to stimulus; signal transduction; soluble fraction; visual perception                                                                                                                                                                                                                                                                                                                                                                    |                                     |          | Known in Uniprot to be phosphorylated | Known in HPRD to be phosphorylated | Kinase                     |          |
| 626 VATG1    | VATG1_HUMAN  | VATG1; Q61B33               | P75348; Q61B33                                                         | NP_004879            | V-type proton ATPase subunit G 1 (V-ATPase subunit G 1) (Vacuolar proton pump subunit G 1) (Vacuolar proton pump subunit H16); ATP6V1G1 protein (ATPase, H+ transporting, lysosomal 13kDa, V1 subunit G1) (ATPase, H+ transporting, lysosomal 13kDa, V1 subunit G1, isoform CRA_a) | GO:0003677; GO:0008630; GO:0005060; GO:0045454; GO:0009055; GO:0005738; GO:0005634; GO:005514; GO:0016491; GO:0005096; GO:0005099; GO:0007266; GO:0006916; GO:0009026; GO:0005737; GO:0005856; GO:0042802; GO:0007162; GO:0005094; GO:0005737; GO:0005096; GO:0007165; GO:0005625; GO:0007601; GO:00015992; GO:0016471; GO:0008553; GO:0005765;                                                                                                                                                                                                                                                                                                                                                                                                                                                                                                                                                                                                                                                                                                                                                                                                                                                                                                                                                                                                                                                                                                                                                                                                                                                                                                                                     |                                                                                                                                                                                                                                                                                                                                                                                                                                                              |                                     |          |                                       |                                    |                            |          |





| Protein Name | Uniprot Name | Other Names           | Uniprot IDs                                                   | Refseq IDs           | Protein Description                                                                                                                                                                                                                                                                                                                                                                                                                                                                                                                                        | GO ID                                                                                                                                                                                                                                                                                                                                                                                                                                                                                                                                                                                                                                                                                                                                                      | GO terms                                                                                                                                                                                                                                                                                                                                                                                                                          | Subcellular location                                              | Comments | Comments - Database Search | Comments - Database Search | Function                              |
|--------------|--------------|-----------------------|---------------------------------------------------------------|----------------------|------------------------------------------------------------------------------------------------------------------------------------------------------------------------------------------------------------------------------------------------------------------------------------------------------------------------------------------------------------------------------------------------------------------------------------------------------------------------------------------------------------------------------------------------------------|------------------------------------------------------------------------------------------------------------------------------------------------------------------------------------------------------------------------------------------------------------------------------------------------------------------------------------------------------------------------------------------------------------------------------------------------------------------------------------------------------------------------------------------------------------------------------------------------------------------------------------------------------------------------------------------------------------------------------------------------------------|-----------------------------------------------------------------------------------------------------------------------------------------------------------------------------------------------------------------------------------------------------------------------------------------------------------------------------------------------------------------------------------------------------------------------------------|-------------------------------------------------------------------|----------|----------------------------|----------------------------|---------------------------------------|
| 653 SPB9     | SPB9_HUMAN   | SPB9; Q5TD03          | P50453; Q5TD03; B2R8W3                                        | NP_004146            | Serin B9 (Cytoplasmic antiprotease 3) (CAP-3) (Proteinase inhibitor 9)                                                                                                                                                                                                                                                                                                                                                                                                                                                                                     | GO:0006916; GO:0005829; GO:0005515; GO:0004867; GO:0001145; GO:0005829; GO:0006915; GO:0051436; GO:0005534; GO:0051437; GO:0005839; GO:0004296; GO:0005511                                                                                                                                                                                                                                                                                                                                                                                                                                                                                                                                                                                                 | anti-apoptosis; cytosol; protein binding; serine-type endopeptidase inhibitor activity; signal transduction                                                                                                                                                                                                                                                                                                                       | Cytoplasm                                                         |          |                            |                            |                                       |
| 654 PSB8     | PSB8_HUMAN   | PSB8; Q5JN56          | Q5JN56; P28062; B0JZC2; Q29824; Q9548                         | NP_004150; NP_683720 | Proteasome subunit beta type-8 (EC 3.4.25.1) (Proteasome subunit beta-5) (Proteasome component C13) (Macropain subunit C13) (Multicatalytic endopeptidase complex subunit C13); Proteasome (Prosome, macropain) subunit beta type 8 (Large multifunctional peptidase 7) (Proteasome (Prosome, macropain) subunit, beta type, 8 (Large multifunctional peptidase 7)) (Proteasome (Prosome, macropain) subunit, beta type, 8 (Large multifunctional peptidase 7), isoform CRA_A)                                                                             | GO:0005252; GO:0003924; GO:0005886; GO:0015031; GO:0005252; GO:0003924; GO:0005886; GO:0015031; GO:0005252; GO:0005794; GO:0005783; GO:0015031; GO:0002654; GO:0005509; GO:0005576; GO:0008347; GO:0005929; GO:0007509; GO:0008045; GO:0008336; GO:0005772; GO:0005102; GO:0001657; GO:0051087; GO:0005737; GO:0005774; GO:0007023; GO:0007021; GO:0003102; GO:0006310; GO:0005737; GO:0005634; GO:0043565                                                                                                                                                                                                                                                                                                                                                 | anaphase-promoting complex-dependent proteasomal ubiquitin-dependent protein catabolic process; cytosol; immune response; negative regulation of ubiquitin protein ligase activity during mitotic cell cycle; nucleus; positive regulation of ubiquitin-protein ligase activity during mitotic cell cycle; proteasome core complex; threonine-type endopeptidase activity; cytosol; ubiquitin-dependent protein catabolic process | Cytoplasm;Nucleus;                                                |          |                            |                            |                                       |
| 655 RB11B    | RB11B_HUMAN  | RB11B                 | Q15907; B2R714; Q20772; Q8N107                                | NP_004209            | Ras-related protein Rab-11B (GTP-binding protein YPT3)                                                                                                                                                                                                                                                                                                                                                                                                                                                                                                     | GO:0005252; GO:0003924; GO:0005886; GO:0015031; GO:0005252; GO:0003924; GO:0005886; GO:0015031; GO:0005252; GO:0005794; GO:0005783; GO:0015031; GO:0002654; GO:0005509; GO:0005576; GO:0008347; GO:0005929; GO:0007509; GO:0008045; GO:0008336; GO:0005772; GO:0005102; GO:0001657; GO:0051087; GO:0005737; GO:0005774; GO:0007023; GO:0007021; GO:0003102; GO:0006310; GO:0005737; GO:0005634; GO:0043565                                                                                                                                                                                                                                                                                                                                                 | GTP binding; GTPase activity; plasma membrane; protein transport; small GTPase mediated signal transduction                                                                                                                                                                                                                                                                                                                       | Cellmembrane;Lipidanc;hor;Cytoplasmicside                         |          |                            |                            | Known in Uniprot to be phosphorylated |
| 656 RAB1A    | RAB1A_HUMAN  | RAB1A; Q5U016         | P62820; Q5U016; P11476; Q96W61; Q91372                        | NP_004152; NP_056358 | Ras-related protein Rab-1A (YPT1-related protein) (RAB1A, member RAS oncogene family) (RAB1A, member RAS oncogene family, isoform CRA_D) (cDNA, FLJ96558, Homo sapiens RAB1A, member RAS oncogene family (RAB1A), mRNA)                                                                                                                                                                                                                                                                                                                                    | GO:0005252; GO:0003924; GO:0005886; GO:0015031; GO:0005252; GO:0003924; GO:0005886; GO:0015031; GO:0005252; GO:0005794; GO:0005783; GO:0015031; GO:0002654; GO:0005509; GO:0005576; GO:0008347; GO:0005929; GO:0007509; GO:0008045; GO:0008336; GO:0005772; GO:0005102; GO:0001657; GO:0051087; GO:0005737; GO:0005774; GO:0007023; GO:0007021; GO:0003102; GO:0006310; GO:0005737; GO:0005634; GO:0043565                                                                                                                                                                                                                                                                                                                                                 | GTP binding; GTPase activity; Golgi apparatus; endoplasmic reticulum; protein transport; small GTPase mediated signal transduction; vesicle-mediated transport                                                                                                                                                                                                                                                                    | Golgiapparatus;Endoplasma;reticulum                               |          |                            |                            | Known in Uniprot to be phosphorylated |
| 657 SLIT2    | SLIT2_HUMAN  | SLIT2                 | Q9A813; Q95710; Q17R13; Q915Q7                                | NP_004778            | Slit homolog 2 protein (Slit-2) [Cleaved into: Slit homolog 2 protein N-product; Slit homolog 2 protein C-product]                                                                                                                                                                                                                                                                                                                                                                                                                                         | GO:0005252; GO:0003924; GO:0005886; GO:0015031; GO:0005252; GO:0003924; GO:0005886; GO:0015031; GO:0005252; GO:0005794; GO:0005783; GO:0015031; GO:0002654; GO:0005509; GO:0005576; GO:0008347; GO:0005929; GO:0007509; GO:0008045; GO:0008336; GO:0005772; GO:0005102; GO:0001657; GO:0051087; GO:0005737; GO:0005774; GO:0007023; GO:0007021; GO:0003102; GO:0006310; GO:0005737; GO:0005634; GO:0043565                                                                                                                                                                                                                                                                                                                                                 | calcium ion binding; extracellular region; glial cell migration; induction of negative chemotaxis; mesoderm migration; motor axon guidance; neuron recognition; positive regulation of axonogenesis; receptor binding; sensory perception of smell; ureteric bud development                                                                                                                                                      | Secreted                                                          |          |                            |                            |                                       |
| 658 TBCA     | TBCA_HUMAN   | TBCA; Q6FGD7          | Q75347; Q6FGD7                                                | NP_004598            | Tubulin-specific chaperone A (Tubulin-folding cofactor A) (CFA) (TCP1-chaperonin cofactor A); TBCA protein (Tubulin folding cofactor A) (Tubulin-specific chaperone A) (cDNA, FLJ92498, Homo sapiens tubulin-specific chaperone A (TBCA), mRNA)                                                                                                                                                                                                                                                                                                            | GO:0005252; GO:0003924; GO:0005886; GO:0015031; GO:0005252; GO:0003924; GO:0005886; GO:0015031; GO:0005252; GO:0005794; GO:0005783; GO:0015031; GO:0002654; GO:0005509; GO:0005576; GO:0008347; GO:0005929; GO:0007509; GO:0008045; GO:0008336; GO:0005772; GO:0005102; GO:0001657; GO:0051087; GO:0005737; GO:0005774; GO:0007023; GO:0007021; GO:0003102; GO:0006310; GO:0005737; GO:0005634; GO:0043565                                                                                                                                                                                                                                                                                                                                                 | chaperone binding; cytoplasm; microtubule; post-chaperonin tubulin folding pathway; tubulin complex assembly; unfolded protein binding; microtubule                                                                                                                                                                                                                                                                               | Cytoplasm;cytoskeleton                                            |          |                            |                            |                                       |
| 659 TSN      | TSN_HUMAN    | TSN                   | Q15631; Q5U0K7                                                | NP_004613            | Transin                                                                                                                                                                                                                                                                                                                                                                                                                                                                                                                                                    | GO:0006310; GO:0005737; GO:0005634; GO:0043565                                                                                                                                                                                                                                                                                                                                                                                                                                                                                                                                                                                                                                                                                                             | DNA recombination; cytoplasm; nucleus; sequence-specific DNA binding                                                                                                                                                                                                                                                                                                                                                              | Cytoplasm;Nucleus                                                 |          |                            |                            |                                       |
| 660 TXNLI    | TXNLI_HUMAN  | TXNLI                 | Q43396                                                        | NP_004777            | Thioredoxin-like protein 1 (32 kDa thioredoxin-related protein)                                                                                                                                                                                                                                                                                                                                                                                                                                                                                            | GO:0045454; GO:0005737; GO:0015036; GO:0022900; GO:0005504; GO:0016021; GO:0006944; GO:0006944; GO:0006944; GO:0006944; GO:0019717; GO:0006944; GO:0016192; GO:0005794; GO:0004887; GO:0005789; GO:0030968; GO:0019899; GO:0016021; GO:0005886; GO:0004570; GO:0004982; GO:0004283; GO:0005198; GO:0019048; GO:0005198;                                                                                                                                                                                                                                                                                                                                                                                                                                    | cell redox homeostasis; cytoplasm; disulfide oxidoreductase activity; electron transport chain; transport                                                                                                                                                                                                                                                                                                                         | Cytoplasm                                                         |          |                            |                            |                                       |
| 661 VAMP3    | VAMP3_HUMAN  | VAMP3; Q6FGG2; Q9BRV4 | Q15836; Q6FGG2; Q9BRV4                                        | NP_004772            | Vesicle-associated membrane protein 3 (VAMP-3) (Synaptobrevin-3) (Cellubrevin) (CEB); VAMP3 protein (Vesicle-associated membrane protein 3 (Cellubrevin)) (cDNA, FLJ92013, Homo sapiens vesicle-associated membrane protein 3 (cellubrevin)(VAMP3), mRNA); Vesicle-associated membrane protein 3 (Cellubrevin)                                                                                                                                                                                                                                             | GO:0005252; GO:0003924; GO:0005886; GO:0015031; GO:0005252; GO:0003924; GO:0005886; GO:0015031; GO:0005252; GO:0005794; GO:0005783; GO:0015031; GO:0002654; GO:0005509; GO:0005576; GO:0008347; GO:0005929; GO:0007509; GO:0008045; GO:0008336; GO:0005772; GO:0005102; GO:0001657; GO:0051087; GO:0005737; GO:0005774; GO:0007023; GO:0007021; GO:0003102; GO:0006310; GO:0005737; GO:0005634; GO:0043565                                                                                                                                                                                                                                                                                                                                                 | cell junction; integral to membrane; membrane fusion; protein complex assembly; synapse; synaptosome; vesicle docking during endocytosis; integral to membrane; vesicle-mediated transport                                                                                                                                                                                                                                        | Membrane;Singlepassy;ptVmembrane;protein                          |          |                            |                            | Known in Uniprot to be phosphorylated |
| 662 VAPB     | VAPB_HUMAN   | VAPB; Q53X97; Q6ZSP7  | Q95292; Q53X97; A2AF2; Q95293; Q9R9H6; Q6ZSP7                 | NP_004729            | Vesicle-associated membrane protein-associated protein B/C (VAMP-associated protein B/C) (VAMP-B/VAMP-C) (VAP-B/VAP-C); VAMP (Vesicle-associated membrane protein)-associated protein B and C (cDNA FL113179 fs, clone NT2RP300391B, highly similar to Vesicle-associated membrane protein-associated protein B/C) (VAMP (Vesicle-associated membrane protein)-associated protein B and C, isoform CRA_B); cDNA FLJ5319 fs, clone BR02P005801, highly similar to Homo sapiens VAMP (vesicle-associated membrane protein)-associated protein B and C (VAPB) | GO:0005794; GO:0004887; GO:0005789; GO:0030968; GO:0019899; GO:0016021; GO:0005886; GO:0004570; GO:0004982; GO:0004283; GO:0005198; GO:0019048; GO:0005198;                                                                                                                                                                                                                                                                                                                                                                                                                                                                                                                                                                                                | Golgi apparatus; beta-tubulin binding; endoplasmic reticulum membrane; endoplasmic reticulum unfolded protein response; enzyme binding; integral to membrane; plasma membrane; positive regulation of viral genome replication; protein heterodimerization activity; protein homodimerization activity; structural molecule activity; virus-host interaction; structural molecule activity;                                       | Cellmembrane;Singlepa;endoplasmicreticulum;membrane;protein       |          |                            |                            | Known in Uniprot to be phosphorylated |
| 663 ANXA3    | ANXA3_HUMAN  | ANXA3; B2R9W6         | P12429; Q6LET2; B2R9W6                                        | NP_005130            | Annexin A3 (Annexin-3) (Annexin III) (Lipoprotein III) (Placental anticoagulant protein III) (PAP-III) (35-alpha calcimedien) (inostol 1,2-cyclic phosphatase 2-phosphohydrolase)                                                                                                                                                                                                                                                                                                                                                                          | GO:0005509; GO:0005544; GO:0005737; GO:0019834; GO:0002020; GO:0003799; GO:0051016; GO:0006928; GO:0006928; GO:0030036; GO:0005737; GO:0005507; GO:0003275; GO:0005737; GO:0015680; GO:0005634; GO:0005515; GO:0005625; GO:0006801; GO:0006879; GO:0006952; GO:0005576; GO:0030492; GO:0006508; GO:0004252                                                                                                                                                                                                                                                                                                                                                                                                                                                 | calcium ion binding; calcium-dependent phospholipid binding; cytoplasm; phospholipase A2 inhibitor activity; signal transduction                                                                                                                                                                                                                                                                                                  | Cytoplasm;cytoskeleton                                            |          |                            |                            | Known in Uniprot to be phosphorylated |
| 664 CAPZB    | CAPZB_HUMAN  | CAPZB; Q32Q68         | Q32Q68; P47756; Q510L4; Q87849; Q9NLC4                        | NP_004921            | F-actin-capping protein subunit beta (CapZ beta); Capping protein (Actin filament) muscle Z-line, beta (Capping protein (Actin filament) muscle Z-line, beta, isoform CRA_c)                                                                                                                                                                                                                                                                                                                                                                               | GO:0005252; GO:0003924; GO:0005886; GO:0015031; GO:0005252; GO:0003924; GO:0005886; GO:0015031; GO:0005252; GO:0005794; GO:0005783; GO:0015031; GO:0002654; GO:0005509; GO:0005576; GO:0008347; GO:0005929; GO:0007509; GO:0008045; GO:0008336; GO:0005772; GO:0005102; GO:0001657; GO:0051087; GO:0005737; GO:0005774; GO:0007023; GO:0007021; GO:0003102; GO:0006310; GO:0005737; GO:0005634; GO:0043565                                                                                                                                                                                                                                                                                                                                                 | F-actin capping protein complex; actin binding; barbed-end actin filament capping; cell motion; cytoplasm; actin cytoskeleton organization; lamellipodium; lamellipodium assembly                                                                                                                                                                                                                                                 | Cytoplasm;cytoskeleton                                            |          |                            |                            | Known in Uniprot to be phosphorylated |
| 665 CCS      | CCS_HUMAN    | CCS                   | Q14618; Q2M366                                                | NP_005116            | Copper chaperone for superoxide dismutase (Superoxide dismutase copper chaperone)                                                                                                                                                                                                                                                                                                                                                                                                                                                                          | GO:0003002; GO:0005507; GO:0003275; GO:0005737; GO:0015680; GO:0005634; GO:0005515; GO:0005625; GO:0006801; GO:0006879; GO:0006952; GO:0005576; GO:0030492; GO:0006508; GO:0004252                                                                                                                                                                                                                                                                                                                                                                                                                                                                                                                                                                         | copper ion binding; copper ion transmembrane transporter activity; cytoplasm; intracellular copper ion transport; nucleus; protein binding; soluble fraction; superoxide metabolic process; zinc ion binding                                                                                                                                                                                                                      | Cytoplasm                                                         |          |                            |                            | Known in Uniprot to be phosphorylated |
| 666 HPT      | HPT_HUMAN    | HPT                   | P00738; B0AZL5; P00737; Q0VAC4; Q2P915; Q3870; Q6L8Y9; Q9UC67 | NP_005134; NP_001119 | Haptoglobin [Cleaved into: Haptoglobin alpha chain; Haptoglobin beta chain]                                                                                                                                                                                                                                                                                                                                                                                                                                                                                | GO:0005252; GO:0003924; GO:0005886; GO:0015031; GO:0005252; GO:0003924; GO:0005886; GO:0015031; GO:0005252; GO:0005794; GO:0005783; GO:0015031; GO:0002654; GO:0005509; GO:0005576; GO:0008347; GO:0005929; GO:0007509; GO:0008045; GO:0008336; GO:0005772; GO:0005102; GO:0001657; GO:0051087; GO:0005737; GO:0005774; GO:0007023; GO:0007021; GO:0003102; GO:0006310; GO:0005737; GO:0005634; GO:0043565                                                                                                                                                                                                                                                                                                                                                 | cellular iron ion homeostasis; defense response; extracellular region; hemoglobin binding; proteolysis; serine-type endopeptidase activity                                                                                                                                                                                                                                                                                        | Secreted                                                          |          |                            |                            |                                       |
| 667 UCRP     | UCRP_HUMAN   | UCRP; Q5SV44          | P05161; Q5SV44; Q7ZG22; Q965F0                                | NP_005092            | Interferon-induced 17 kDa protein [Cleaved into: Ubiquitin cross-reactive protein (IUCRP) (Interferon-induced 15 kDa protein)]                                                                                                                                                                                                                                                                                                                                                                                                                             | GO:0003202; GO:0002020; GO:0005737; GO:0005515; GO:0044419; GO:0019941; GO:0005515; GO:0009615; GO:0006512; GO:0008137; GO:0006210; GO:0005747; GO:0006810; GO:0004197; GO:0005737; GO:0006464; GO:0005193; GO:0004221; GO:0006511; GO:0004930; GO:0007186; GO:0005887; GO:0008092; GO:0005856; GO:0003088; GO:0004332; GO:0006096; GO:0007254; GO:0007265; GO:0005070; GO:0005737; GO:0005886; GO:0004713; GO:0001533; GO:0004869; GO:0005737; GO:0030216; GO:0019466; GO:0005634; GO:0018149; GO:0002020; GO:0030674; GO:0005196; GO:0005629; GO:0005524; GO:0004713; GO:0004648; GO:0005515; GO:0009615; GO:0005524; GO:0005525; GO:0006538; GO:0004353; GO:0004352; GO:0005759; GO:0005514; GO:0007169; GO:0007186; GO:0005514; GO:0009755; GO:0004871 | ISG15-protein conjugation; cell-cell signaling; cytoplasm; extracellular space; interspecies interaction between organisms; modification-dependent protein catabolic process; protein binding; response to virus; ubiquitin cycle                                                                                                                                                                                                 | Cytoplasm;Secreted                                                |          |                            |                            |                                       |
| 668 NDUAS    | NDUAS_HUMAN  | NDUAS; B2R9D8         | Q16718; Q61820; B2R9D8                                        | NP_004991            | NADH dehydrogenase [ubiquinone] 1 alpha subcomplex subunit 5 (NADH-ubiquinone oxidoreductase 13 kDa-B subunit) (Complex I-13kD-B) (CI-13kD-B) (Complex I subunit B13)                                                                                                                                                                                                                                                                                                                                                                                      | GO:0005252; GO:0003924; GO:0005886; GO:0015031; GO:0005252; GO:0003924; GO:0005886; GO:0015031; GO:0005252; GO:0005794; GO:0005783; GO:0015031; GO:0002654; GO:0005509; GO:0005576; GO:0008347; GO:0005929; GO:0007509; GO:0008045; GO:0008336; GO:0005772; GO:0005102; GO:0001657; GO:0051087; GO:0005737; GO:0005774; GO:0007023; GO:0007021; GO:0003102; GO:0006310; GO:0005737; GO:0005634; GO:0043565                                                                                                                                                                                                                                                                                                                                                 | NADH binding; mitochondrial electron transport; NADH to ubiquinone; mitochondrial respiratory chain complex 1; transport cysteine-type endopeptidase activity; cytoplasm; protein modification process; RNA guanylyltransferase activity; ubiquitin thioesterase activity; ubiquitin-dependent protein catabolic process;                                                                                                         | Mitochondrion;innermembrane;peripheralmembrane;protein;Matrixside |          |                            |                            |                                       |
| 669 UBP14    | UBP14_HUMAN  | UBP14; Q53XYS         | P54578; Q53XYS                                                | NP_005142; NP_001032 | Ubiquitin carboxyl-terminal hydrolase 14 (EC 3.1.1.15) (Ubiquitin thioesterase 14) (Deubiquitinating enzyme 14)                                                                                                                                                                                                                                                                                                                                                                                                                                            | GO:0005252; GO:0003924; GO:0005886; GO:0015031; GO:0005252; GO:0003924; GO:0005886; GO:0015031; GO:0005252; GO:0005794; GO:0005783; GO:0015031; GO:0002654; GO:0005509; GO:0005576; GO:0008347; GO:0005929; GO:0007509; GO:0008045; GO:0008336; GO:0005772; GO:0005102; GO:0001657; GO:0051087; GO:0005737; GO:0005774; GO:0007023; GO:0007021; GO:0003102; GO:0006310; GO:0005737; GO:0005634; GO:0043565                                                                                                                                                                                                                                                                                                                                                 | ubiquitin-specific protease activity; G-protein coupled receptor activity; G-protein coupled receptor protein signaling pathway; integral to plasma membrane cytoskeletal protein binding; cytoskeleton; fructose 1,6-bisphosphate metabolic process; fructose-bisphosphate aldolase activity; glycolysis                                                                                                                         | Cellmembrane;Multiplas smembrane;protein                          |          |                            |                            | Known in Uniprot to be phosphorylated |
| 670 API      | API_HUMAN    | API; B3KQ94           | P35414; B3KQ94                                                | NP_005152            | Angiotensin receptor (G-protein coupled receptor API) (Angiotensin receptor-like 1) (EC 1.4.1.13)                                                                                                                                                                                                                                                                                                                                                                                                                                                          | GO:0005252; GO:0003924; GO:0005886; GO:0015031; GO:0005252; GO:0003924; GO:0005886; GO:0015031; GO:0005252; GO:0005794; GO:0005783; GO:0015031; GO:0002654; GO:0005509; GO:0005576; GO:0008347; GO:0005929; GO:0007509; GO:0008045; GO:0008336; GO:0005772; GO:0005102; GO:0001657; GO:0051087; GO:0005737; GO:0005774; GO:0007023; GO:0007021; GO:0003102; GO:0006310; GO:0005737; GO:0005634; GO:0043565                                                                                                                                                                                                                                                                                                                                                 | cellular iron ion homeostasis; defense response; extracellular region; hemoglobin binding; proteolysis; serine-type endopeptidase activity                                                                                                                                                                                                                                                                                        | Cellmembrane;Multiplas smembrane;protein                          |          |                            |                            | Known in Uniprot to be phosphorylated |
| 671 ALDOC    | ALDOC_HUMAN  | ALDOC; Q6FH94; B2R5R3 | Q6FH94; Q531L3; Q6P0L5; B2R5R3; P46109; ABK444                | NP_005156            | Fructose-bisphosphate aldolase C (EC 4.1.2.13) (Brain-type aldolase)                                                                                                                                                                                                                                                                                                                                                                                                                                                                                       | GO:0008092; GO:0005856; GO:0003088; GO:0004332; GO:0006096; GO:0007254; GO:0007265; GO:0005070; GO:0005737; GO:0005886; GO:0004713; GO:0001533; GO:0004869; GO:0005737; GO:0030216; GO:0019466; GO:0005634; GO:0018149; GO:0002020; GO:0030674; GO:0005196; GO:0005629; GO:0005524; GO:0004713; GO:0004648; GO:0005515; GO:0009615; GO:0005524; GO:0005525; GO:0006538; GO:0004353; GO:0004352; GO:0005759; GO:0005514; GO:0007169; GO:0007186; GO:0005514; GO:0009755; GO:0004871                                                                                                                                                                                                                                                                         | ATP binding; non-membrane spanning protein tyrosine kinase activity; protein amino acid phosphorylation; protein binding; response to virus                                                                                                                                                                                                                                                                                       | Cellmembrane;Multiplas smembrane;protein                          |          |                            |                            | Known in Uniprot to be phosphorylated |
| 672 CRKL     | CRKL_HUMAN   | CRKL; ABK444          | P46109; ABK444                                                | NP_005198            | Crk-like protein                                                                                                                                                                                                                                                                                                                                                                                                                                                                                                                                           | GO:0007254; GO:0007265; GO:0005070; GO:0005737; GO:0005886; GO:0004713; GO:0001533; GO:0004869; GO:0005737; GO:0030216; GO:0019466; GO:0005634; GO:0018149; GO:0002020; GO:0030674; GO:0005196; GO:0005629; GO:0005524; GO:0004713; GO:0004648; GO:0005515; GO:0009615; GO:0005524; GO:0005525; GO:0006538; GO:0004353; GO:0004352; GO:0005759; GO:0005514; GO:0007169; GO:0007186; GO:0005514; GO:0009755; GO:0004871                                                                                                                                                                                                                                                                                                                                     | JNK cascade; Ras protein signal transduction; SH3/SH2 adaptor activity; cytoplasm; plasma membrane; protein tyrosine kinase activity                                                                                                                                                                                                                                                                                              | Cellmembrane;Lipidanc;hor;Cytoplasmicside                         |          |                            |                            | Known in Uniprot to be phosphorylated |
| 673 CYTA     | CYTA_HUMAN   | CYTA; Q61B90          | P01040; Q61B90                                                | NP_005204            | Cystatin-A (Cystatin-AS) (Steffin-A); CSTA protein (Cystatin A (Steffin A)) (cDNA FLJ75405, highly similar to Homo sapiens cystatin A (stefin A) (CSTA), mRNA)                                                                                                                                                                                                                                                                                                                                                                                             | GO:0005252; GO:0003924; GO:0005886; GO:0015031; GO:0005252; GO:0003924; GO:0005886; GO:0015031; GO:0005252; GO:0005794; GO:0005783; GO:0015031; GO:0002654; GO:0005509; GO:0005576; GO:0008347; GO:0005929; GO:0007509; GO:0008045; GO:0008336; GO:0005772; GO:0005102; GO:0001657; GO:0051087; GO:0005737; GO:0005774; GO:0007023; GO:0007021; GO:0003102; GO:0006310; GO:0005737; GO:0005634; GO:0043565                                                                                                                                                                                                                                                                                                                                                 | cornified envelope; cysteine-type endopeptidase inhibitor activity; cytoplasm; keratinocyte differentiation; negative regulation of peptidase activity; nucleus; peptide cross-linking; protease binding; protein binding, bridging; structural molecule activity; cysteine-type endopeptidase inhibitor activity; intracellular                                                                                                  | Cytoplasm;                                                        |          |                            |                            |                                       |
| 674 FGR      | FGR_HUMAN    | FGR                   | P09769; Q9U1Q3                                                | NP_005239; NP_001036 | Proto-oncogene tyrosine-protein kinase FGR (C-FGR) (EC 7.1.0.2) (P95-FGR)                                                                                                                                                                                                                                                                                                                                                                                                                                                                                  | GO:0005252; GO:0003924; GO:0005886; GO:0015031; GO:0005252; GO:0003924; GO:0005886; GO:0015031; GO:0005252; GO:0005794; GO:0005783; GO:0015031; GO:0002654; GO:0005509; GO:0005576; GO:0008347; GO:0005929; GO:0007509; GO:0008045; GO:0008336; GO:0005772; GO:0005102; GO:0001657; GO:0051087; GO:0005737; GO:0005774; GO:0007023; GO:0007021; GO:0003102; GO:0006310; GO:0005737; GO:0005634; GO:0043565                                                                                                                                                                                                                                                                                                                                                 | ATP binding; non-membrane spanning protein tyrosine kinase activity; protein amino acid phosphorylation; protein binding; response to virus                                                                                                                                                                                                                                                                                       | Cellmembrane;Multiplas smembrane;protein                          |          |                            |                            | Known in Uniprot to be phosphorylated |
| 675 DHE3     | DHE3_HUMAN   | DHE3                  | P00367; Q57B33                                                | NP_005262            | Glutamate dehydrogenase 1, mitochondrial (GDH) (EC 1.4.1.3)                                                                                                                                                                                                                                                                                                                                                                                                                                                                                                | GO:0005252; GO:0003924; GO:0005886; GO:0015031; GO:0005252; GO:0003924; GO:0005886; GO:0015031; GO:0005252; GO:0005794; GO:0005783; GO:0015031; GO:0002654; GO:0005509; GO:0005576; GO:0008347; GO:0005929; GO:0007509; GO:0008045; GO:0008336; GO:0005772; GO:0005102; GO:0001657; GO:0051087; GO:0005737; GO:0005774; GO:0007023; GO:0007021; GO:0003102; GO:0006310                                                                                                                                                                                                                                                                                                                                                                                     |                                                                                                                                                                                                                                                                                                                                                                                                                                   |                                                                   |          |                            |                            |                                       |





| Protein Name | Uniprot Name | Other Names | Uniprot Ids                    | Refseq IDs                                     | Protein Description                                                                                                                                                                                                                                      | GO ID                                                                                                                                                                                                                                                                                                                                                                                                                                                                                                                                                                 | GO terms                                                                                                                                                                                                                                                                                                                                                                                                                                                                                                                                                                                                                                     | Subcellular location                       | Comments | Comments - Database Search | Comments - Database Search            | Function                           |
|--------------|--------------|-------------|--------------------------------|------------------------------------------------|----------------------------------------------------------------------------------------------------------------------------------------------------------------------------------------------------------------------------------------------------------|-----------------------------------------------------------------------------------------------------------------------------------------------------------------------------------------------------------------------------------------------------------------------------------------------------------------------------------------------------------------------------------------------------------------------------------------------------------------------------------------------------------------------------------------------------------------------|----------------------------------------------------------------------------------------------------------------------------------------------------------------------------------------------------------------------------------------------------------------------------------------------------------------------------------------------------------------------------------------------------------------------------------------------------------------------------------------------------------------------------------------------------------------------------------------------------------------------------------------------|--------------------------------------------|----------|----------------------------|---------------------------------------|------------------------------------|
| 722          | IPO7         | IPO7_HUMAN  | IPO7                           | NP_006382                                      | Importin-7 (Imp7) (Ran-binding protein 7) (RanBP7)                                                                                                                                                                                                       | GO:000536; GO:0005737; GO:0044419; GO:0005643; GO:0000059; GO:0000585; GO:0007165; GO:0005083; GO:0003925; GO:0005737; GO:0007265; GO:0005522; GO:0005886; GO:0005515; GO:0003036; GO:0008630; GO:0005737; GO:0005615; GO:0043154; GO:0006469; GO:0005534; GO:0019904; GO:0008426; GO:0005509; GO:0016621; GO:0004270; GO:0005515; GO:0006122; GO:0005746; GO:0006810; GO:0008121; GO:0006122; GO:0045453; GO:0006629; GO:0005754; GO:0042470; GO:0007399; GO:0043171; GO:0005515; GO:0030163; GO:0005508; GO:0004252; GO:0005625; GO:0005737; GO:0008180; GO:0008180 | Ran GTPase binding; cytoplasm; interspecies interaction between organisms; nuclear pore; protein import into nucleus; docking; protein transporter activity; signal transduction; small GTPase regulator activity; soluble fraction                                                                                                                                                                                                                                                                                                                                                                                                          | CytoplasmNucleus                           |          |                            | Known in Uniprot to be phosphorylated |                                    |
| 723          | RRAS         | RRAS_HUMAN  | RRAS; Q6FH12                   | P13031; Q6FH12                                 | Ras-related protein R-Ras (p23); RRAS protein (Related RAS viral R-Ras oncogene homolog, isoform CRA_a)                                                                                                                                                  | GO:0005509; GO:0016621; GO:0004270; GO:0005515; GO:0006122; GO:0005746; GO:0006810; GO:0008121; GO:0006122; GO:0045453; GO:0006629; GO:0005754; GO:0042470; GO:0007399; GO:0043171; GO:0005515; GO:0030163; GO:0005508; GO:0004252; GO:0005625; GO:0005737; GO:0008180; GO:0008180                                                                                                                                                                                                                                                                                    | GTP binding; GTPase activity; Ras protein signal transduction; Intracellular; plasma membrane; protein binding; negative regulation of cell migration; small GTPase mediated signal transduction                                                                                                                                                                                                                                                                                                                                                                                                                                             | Cellmembranecytoplasm; horCytoplasmicside; |          |                            | known in HPRD to be phosphorylated    |                                    |
| 724          | 14335        | 14335_HUMAN | 14335                          | P31947; Q6FH30; Q6FH51; Q96D10                 | 14-3-3 protein sigma (Stratfin) (Epithelial cell marker protein 1)                                                                                                                                                                                       | GO:0005509; GO:0016621; GO:0004270; GO:0005515; GO:0006122; GO:0005746; GO:0006810; GO:0008121; GO:0006122; GO:0045453; GO:0006629; GO:0005754; GO:0042470; GO:0007399; GO:0043171; GO:0005515; GO:0030163; GO:0005508; GO:0004252; GO:0005625; GO:0005737; GO:0008180; GO:0008180                                                                                                                                                                                                                                                                                    | DNA damage response, signal transduction resulting in induction of apoptosis; cytoplasm; extracellular space; negative regulation of caspase activity; negative regulation of protein kinase activity; nucleus; protein domain specific binding; protein kinase C inhibitor activity; release of cytochrome c from mitochondria                                                                                                                                                                                                                                                                                                              | CytoplasmNucleusSec eted                   |          |                            | Known in Uniprot to be phosphorylated |                                    |
| 725          | SSRD         | SSRD_HUMAN  | SSRD; Q53X11; ABK378           | P51571; Q53X11; ABK378                         | Translocon-associated protein subunit delta (TRAP-delta) (Signal sequence receptor subunit delta) (SSR-delta)                                                                                                                                            | GO:0005509; GO:0016621; GO:0004270; GO:0005515; GO:0006122; GO:0005746; GO:0006810; GO:0008121; GO:0006122; GO:0045453; GO:0006629; GO:0005754; GO:0042470; GO:0007399; GO:0043171; GO:0005515; GO:0030163; GO:0005508; GO:0004252; GO:0005625; GO:0005737; GO:0008180; GO:0008180                                                                                                                                                                                                                                                                                    | calcium ion binding; integral to membrane; intracellular protein membraneSinglepassy peptidembraneprotein                                                                                                                                                                                                                                                                                                                                                                                                                                                                                                                                    | Endoplasmicreticulum                       |          |                            |                                       |                                    |
| 726          | UCR6         | UCR6_HUMAN  | UCR6; Q6FGD1; QCR7             | P14927; Q6FGD1                                 | Cytochrome b-c1 complex subunit 7 (Ubiquinol-cytochrome c reductase complex 14 kDa protein) (Complex III subunit 7) (Complex III subunit VII) (Q <sub>b</sub> -C); UCR6 protein (Ubiquinol-cytochrome c reductase binding protein)                       | GO:0005509; GO:0016621; GO:0004270; GO:0005515; GO:0006122; GO:0005746; GO:0006810; GO:0008121; GO:0006122; GO:0045453; GO:0006629; GO:0005754; GO:0042470; GO:0007399; GO:0043171; GO:0005515; GO:0030163; GO:0005508; GO:0004252; GO:0005625; GO:0005737; GO:0008180; GO:0008180                                                                                                                                                                                                                                                                                    | aerobic respiration; mitochondrial electron transport, ubiquinol to cytochrome c; mitochondrial respiratory chain; transport; ubiquinol-cytochrome c reductase activity; mitochondrial electron transport, ubiquinol to cytochrome c                                                                                                                                                                                                                                                                                                                                                                                                         | Mitochondrioninnerme mbra;                 |          |                            |                                       |                                    |
| 727          | TPP1         | TPP1_HUMAN  | TPP1                           | Q14773; Q53HT1; Q5JAK6; Q6IKX6; Q7LIP6; Q96C37 | Tripeptidyl-peptidase 1 (TPP-1) (Tripeptidyl-peptidase 1) (TPP-1) (Tripeptidyl aminopeptidase) (Lysosomal peptatinin-insensitive protease) (LIPC) (Cell growth-inhibiting gene 1 protein)                                                                | GO:0005509; GO:0016621; GO:0004270; GO:0005515; GO:0006122; GO:0005746; GO:0006810; GO:0008121; GO:0006122; GO:0045453; GO:0006629; GO:0005754; GO:0042470; GO:0007399; GO:0043171; GO:0005515; GO:0030163; GO:0005508; GO:0004252; GO:0005625; GO:0005737; GO:0008180; GO:0008180                                                                                                                                                                                                                                                                                    | lysosome; lysosomal; lysosome development; peptide catabolic process; protein binding; protein catabolic process; proteolysis; serine-type endopeptidase activity; soluble fraction; tripeptidyl-peptidase activity                                                                                                                                                                                                                                                                                                                                                                                                                          | LysosomeMelanosome                         |          |                            |                                       |                                    |
| 728          | CSN8         | CSN8_HUMAN  | CSN8; Q5Q3Q9                   | Q96C27; Q5Q3Q9                                 | CDP9 signalosome complex subunit 8 (Signalosome subunit 8) (SGNB) (JAB1-containing signalosome subunit 8) (CDP9 homolog) (hCOP9); CDP9 constitutive photoperforic homolog subunit 8 (Arabidopsis), isoform CRA_a (Putative uncharacterized protein CDP9) | GO:0005509; GO:0016621; GO:0004270; GO:0005515; GO:0006122; GO:0005746; GO:0006810; GO:0008121; GO:0006122; GO:0045453; GO:0006629; GO:0005754; GO:0042470; GO:0007399; GO:0043171; GO:0005515; GO:0030163; GO:0005508; GO:0004252; GO:0005625; GO:0005737; GO:0008180; GO:0008180                                                                                                                                                                                                                                                                                    | cytoplasm; signalosome;                                                                                                                                                                                                                                                                                                                                                                                                                                                                                                                                                                                                                      | CytoplasmNucleus;                          |          |                            | Known in Uniprot to be phosphorylated |                                    |
| 729          | NUDT3        | NUDT3_HUMAN | NUDT3; B2R8N4                  | Q95899; B2R8N4                                 | Diphosphoinositol polyphosphate phosphohydrolase 1 (DIPP-1) (EC 3.6.1.52) (Diadenosine 5',5''-P <sub>1</sub> ,P <sub>6</sub> -hexaphosphate hydrolase 1) (EC 3.6.1.-) (Nucleoside diphosphate linked moiety X motif 3) (Nudix motif 3)                   | GO:0007267; GO:0005737; GO:0015961; GO:0008466; GO:0007155; GO:0005083; GO:0008037; GO:0009986; GO:0009986; GO:0005787; GO:0045121; GO:0060369; GO:0002891; GO:0033005; GO:0002860; GO:0019901; GO:0006916; GO:0005975; GO:0005737; GO:0004462; GO:0006695; GO:0005777; GO:0004631; GO:0006468; GO:0005515; GO:0005737                                                                                                                                                                                                                                                | cell-cell signaling; cytoplasm; diadenosine polyphosphate catabolic process; diphosphoinositol-polyphosphate diphosphatase activity; magnesium ion binding                                                                                                                                                                                                                                                                                                                                                                                                                                                                                   | Cytoplasm                                  |          |                            |                                       |                                    |
| 730          | CD226        | CD226_HUMAN | CD226; B2R818                  | Q15762; B2R818                                 | CD226 antigen (DNAX accessory molecule 1) (DNAX-1) (CD antigen CD226)                                                                                                                                                                                    | GO:0007155; GO:0005083; GO:0008037; GO:0009986; GO:0009986; GO:0005787; GO:0045121; GO:0060369; GO:0002891; GO:0033005; GO:0002860; GO:0019901; GO:0006916; GO:0005975; GO:0005737; GO:0004462; GO:0006695; GO:0005777; GO:0004631; GO:0006468; GO:0005515; GO:0005737                                                                                                                                                                                                                                                                                                | cell adhesion; cell adhesion molecule binding; cell recognition; cell surface; integral to plasma membrane; integrin binding; membrane raft; positive regulation of Fc receptor mediated stimulatory signaling pathway; positive regulation of immunoglobulin mediated immune response; positive regulation of mast cell activation; positive regulation of natural killer cell mediated cytotoxicity directed against tumor cell target; protein kinase binding; receptor activity                                                                                                                                                          | MembraneSinglepassy peptidembraneprotein   |          |                            | Known in Uniprot to be phosphorylated |                                    |
| 731          | LGUL         | LGUL_HUMAN  | LGUL                           | Q04760; B2R6P7; P78375; Q5TZW3; Q96FC0; Q96J41 | Lactoylglutathione lyase (EC 4.4.1.5) (Methylglyoxalase) (Aldoketomutase) (Glyoxalase 1) (Glx 1) (Ketone-aldehyde mutase) (S-D-lactoylglutathione methylglyoxal lyase)                                                                                   | GO:0005509; GO:0016621; GO:0004270; GO:0005515; GO:0006122; GO:0005746; GO:0006810; GO:0008121; GO:0006122; GO:0045453; GO:0006629; GO:0005754; GO:0042470; GO:0007399; GO:0043171; GO:0005515; GO:0030163; GO:0005508; GO:0004252; GO:0005625; GO:0005737; GO:0008180; GO:0008180                                                                                                                                                                                                                                                                                    | anti-apoptosis; carbohydrate metabolic process; cytoplasm; lactoylglutathione lyase activity; zinc ion binding                                                                                                                                                                                                                                                                                                                                                                                                                                                                                                                               |                                            |          |                            |                                       |                                    |
| 732          | PMVK         | PMVK_HUMAN  | PMVK; Q6FGV9                   | Q15126; Q6FGV9; Q5TZW9                         | Phosphomevalonate kinase (PMKase) (EC 2.7.4.2); PMVK protein (Phosphomevalonate kinase) (Phosphomevalonate kinase, isoform CRA_a) (CDNA_FL33228, Homo sapiens phosphomevalonate kinase (PMVK), mRNA) (Fragments)                                         | GO:0005509; GO:0016621; GO:0004270; GO:0005515; GO:0006122; GO:0005746; GO:0006810; GO:0008121; GO:0006122; GO:0045453; GO:0006629; GO:0005754; GO:0042470; GO:0007399; GO:0043171; GO:0005515; GO:0030163; GO:0005508; GO:0004252; GO:0005625; GO:0005737; GO:0008180; GO:0008180                                                                                                                                                                                                                                                                                    | cholesterol biosynthetic process; peroxisome; phosphomevalonate kinase activity; protein amino acid phosphorylation; protein binding; cytoplasm                                                                                                                                                                                                                                                                                                                                                                                                                                                                                              | Peroxisome;                                |          |                            | Kinase                                |                                    |
| 733          | PR56B        | PR56B_HUMAN | PR56B; ABK2M0                  | P43686; Q96FV5; Q9UBW3; Q9UEX3; ABK2M0         | 26S protease regulatory subunit 6B (Proteasome subunit ATPase 4) (MB67-interacting protein) (MIP224) (TAF-binding protein 7) (TBP-7)                                                                                                                     | GO:0005509; GO:0016621; GO:0004270; GO:0005515; GO:0006122; GO:0005746; GO:0006810; GO:0008121; GO:0006122; GO:0045453; GO:0006629; GO:0005754; GO:0042470; GO:0007399; GO:0043171; GO:0005515; GO:0030163; GO:0005508; GO:0004252; GO:0005625; GO:0005737; GO:0008180; GO:0008180                                                                                                                                                                                                                                                                                    | ATP binding; ATPase activity; anaphase-promoting complex-dependent proteasomal ubiquitin-dependent protein catabolic process; cytosol; negative regulation of ubiquitin-protein ligase activity during mitotic cell cycle; nucleus; positive regulation of ubiquitin-protein ligase activity during mitotic cell cycle; proteasome complex; protein binding                                                                                                                                                                                                                                                                                  | CytoplasmNucleus                           |          |                            | Known in Uniprot to be phosphorylated |                                    |
| 734          | RRAGA        | RRAGA_HUMAN | RRAGA; B2R7L1                  | Q71523; Q00290; Q15347; B2R7L1                 | Ras-related GTP-binding protein A (Rag A) (RagA) (Adenovirus E3 14.7 kDa-interacting protein 1) (FIP-1)                                                                                                                                                  | GO:0005509; GO:0016621; GO:0004270; GO:0005515; GO:0006122; GO:0005746; GO:0006810; GO:0008121; GO:0006122; GO:0045453; GO:0006629; GO:0005754; GO:0042470; GO:0007399; GO:0043171; GO:0005515; GO:0030163; GO:0005508; GO:0004252; GO:0005625; GO:0005737; GO:0008180; GO:0008180                                                                                                                                                                                                                                                                                    | GTP binding; Golgi apparatus; apoptosis; cell surface receptor linked signal transduction; nucleus; phosphoprotein binding; positive regulation of cytolysis; protein heterodimerization activity; protein homodimerization activity; virus-host interaction                                                                                                                                                                                                                                                                                                                                                                                 | CytoplasmNucleus                           |          |                            |                                       |                                    |
| 735          | SRCAP        | SRCAP_HUMAN | Q9Y5L9; Q6R5E2; Q15026; Q72744 | XP_297088; NP_006653                           | Helicase SRCAP (EC 3.6.1.-) (Snf2-related CBP activator) (Domino homolog 2)                                                                                                                                                                              | GO:0005509; GO:0016621; GO:0004270; GO:0005515; GO:0006122; GO:0005746; GO:0006810; GO:0008121; GO:0006122; GO:0045453; GO:0006629; GO:0005754; GO:0042470; GO:0007399; GO:0043171; GO:0005515; GO:0030163; GO:0005508; GO:0004252; GO:0005625; GO:0005737; GO:0008180; GO:0008180                                                                                                                                                                                                                                                                                    | ATP binding; DNA binding; chromatin modification; helicase activity; histone acetyltransferase activity; interspecies interaction between organisms; nucleus; regulation of transcription from RNA polymerase II promoter; transcription coactivator activity                                                                                                                                                                                                                                                                                                                                                                                | Nucleus                                    |          |                            | Known in Uniprot to be phosphorylated |                                    |
| 736          | DEST         | DEST_HUMAN  | DEST; B2R6N2                   | P60981; B2R6N2; P1K282; Q5W166; Q61AW2         | Destrin (Actin-depolymerizing factor) (ADF)                                                                                                                                                                                                              | GO:0005509; GO:0016621; GO:0004270; GO:0005515; GO:0006122; GO:0005746; GO:0006810; GO:0008121; GO:0006122; GO:0045453; GO:0006629; GO:0005754; GO:0042470; GO:0007399; GO:0043171; GO:0005515; GO:0030163; GO:0005508; GO:0004252; GO:0005625; GO:0005737; GO:0008180; GO:0008180                                                                                                                                                                                                                                                                                    | actin binding; actin filament severing                                                                                                                                                                                                                                                                                                                                                                                                                                                                                                                                                                                                       |                                            |          |                            | Known in Uniprot to be phosphorylated | Known in HPRD to be phosphorylated |
| 737          | PRDX3        | PRDX3_HUMAN | PRDX3                          | P30048; NP_006784                              | Thioredoxin-dependent peroxide reductase, mitochondrial (EC 1.1.1.115) (Peroxiredoxin-3) (PRX III) (Antioxidant protein 1) (ADP-1) (Protein ME53 homolog) (HBC189)                                                                                       | GO:0007885; GO:0043027; GO:0045454; GO:0034614; GO:0005769; GO:0042744; GO:0005739; GO:0007005; GO:0030099; GO:0043066; GO:0033673; GO:0055114; GO:0051920; GO:0008284; GO:0008022; GO:0019901; GO:0051881; GO:0003779; GO:0005104                                                                                                                                                                                                                                                                                                                                    | alkyl hydroperoxide reductase activity; caspase inhibitor activity; cell redox homeostasis; cellular response to reactive oxygen species; early endosome; hydrogen peroxide catabolic process; mitochondrial; mitochondrial organization; myeloid cell differentiation; negative regulation of apoptosis; negative regulation of kinase activity; oxidation reduction; peroxiredoxin activity; positive regulation of NF-kappaB transcription factor activity; positive regulation of cell proliferation; protein C-terminus binding; protein kinase binding; regulation of mitochondrial membrane potential; response to lipopolysaccharide | Mitochondrion                              |          |                            |                                       |                                    |
| 738          | ABEC2        | ABEC2_HUMAN | ABEC2; B2R899                  | Q9Y235; Q53FZ8; Q5TGU5; B2R899                 | Probable C->U-editing enzyme APOBEC-2 (EC 3.5.4.-)                                                                                                                                                                                                       | GO:0003723; GO:0004126; GO:0006397; GO:0008270                                                                                                                                                                                                                                                                                                                                                                                                                                                                                                                        | RNA binding; cytidine deaminase activity; mRNA processing; zinc ion binding                                                                                                                                                                                                                                                                                                                                                                                                                                                                                                                                                                  |                                            |          |                            |                                       |                                    |
| 739          | DIAP2        | DIAP2_HUMAN | DIAP2                          | Q69879; A6G619; Q69879; Q8WX06; Q8WX48; Q9ULJ2 | Protein diaphanous homolog 2 (Diaphanous-related formin-2) (DRF2)                                                                                                                                                                                        | GO:0005794; GO:0017048; GO:0003779; GO:0030036; GO:0030154; GO:0000910; GO:0005769; GO:0007275; GO:0004877; GO:0006096; GO:0002887; GO:0004634; GO:0000015; GO:0005886; GO:0005783; GO:0002887; GO:0004634; GO:0000015; GO:0005886; GO:0004470; GO:0003756; GO:0006457; GO:0003723; GO:0003053; GO:0000398; GO:0000166; GO:0003052                                                                                                                                                                                                                                    | Golgi apparatus; Rho GTPase binding; actin binding; actin cytoskeleton organization; cell differentiation; cytokinesis; early endosome; multicellular organismal development; oogenesis; receptor binding                                                                                                                                                                                                                                                                                                                                                                                                                                    | CytoplasmcytosolEarly endosome             |          |                            | Known in Uniprot to be phosphorylated |                                    |
| 740          | ENOG         | ENOG_HUMAN  | ENOG; Q6FHV6                   | P09104; Q6FHV6; Q9G133                         | Gamma-enolase (EC 4.2.1.11) (2-phospho-D-glycerate hydro-lyase) (Neural enolase) (Neuron-specific enolase) (NSE) (Enolase 2) (EC 4.2.1.11)                                                                                                               | GO:0005783; GO:0002887; GO:0004634; GO:0000015; GO:0005886; GO:0004470; GO:0003756; GO:0006457; GO:0003723; GO:0003053; GO:0000398; GO:0000166; GO:0003052                                                                                                                                                                                                                                                                                                                                                                                                            | glycolysis; magnesium ion binding; phosphopyruvate hydratase activity; phosphopyruvate hydratase complex; plasma membrane                                                                                                                                                                                                                                                                                                                                                                                                                                                                                                                    | CytoplasmCellmembra ne;                    |          |                            | Known in Uniprot to be phosphorylated |                                    |
| 741          | ERP29        | ERP29_HUMAN | ERP29                          | P30040; Q9AHC3; Q6FHT4                         | Endoplasmic reticulum protein ERP29 (ERp31) (Erp29)                                                                                                                                                                                                      | GO:0005783; GO:0002887; GO:0004634; GO:0000015; GO:0005886; GO:0004470; GO:0003756; GO:0006457; GO:0003723; GO:0003053; GO:0000398; GO:0000166; GO:0003052                                                                                                                                                                                                                                                                                                                                                                                                            | endoplasmic reticulum; endoplasmic reticulum lumen; intracellular protein transport; melanosome; protein disulfide isomerase activity; protein folding; protein secretion                                                                                                                                                                                                                                                                                                                                                                                                                                                                    | Endoplasmicreticulum umenMelanosome        |          |                            | Known in Uniprot to be phosphorylated |                                    |
| 742          | ROAO         | ROAO_HUMAN  | ROAO; Q6IB18                   | Q11515; Q6IB18                                 | Heterogeneous nuclear ribonucleoprotein A0 (hnRNP A0); HNRPA0 protein (Heterogeneous nuclear ribonucleoprotein A0)                                                                                                                                       | GO:0005783; GO:0002887; GO:0004634; GO:0000015; GO:0005886; GO:0004470; GO:0003756; GO:0006457; GO:0003723; GO:0003053; GO:0000398; GO:0000166; GO:0003052                                                                                                                                                                                                                                                                                                                                                                                                            | RNA binding; heterogeneous nuclear ribonucleoprotein complex; nuclear mRNA splicing, via spliceosome; nucleotide binding; nucleic acid binding; ribonucleoprotein complex                                                                                                                                                                                                                                                                                                                                                                                                                                                                    | Nucleus;                                   |          |                            | Known in Uniprot to be phosphorylated |                                    |





| Protein Name | Uniprot Name | Other Names                   | Uniprot Ids                                                            | Refseq IDs                              | Protein Description                                                                                                                                                                                                                                                    | GO ID                                                                                                                                                                                                      | GO terms                                                                                                                                                                                                                                                                                               | Subcellular location                                                                                                                                                | Comments | Comments - Database Search            | Comments - Database Search | Function |
|--------------|--------------|-------------------------------|------------------------------------------------------------------------|-----------------------------------------|------------------------------------------------------------------------------------------------------------------------------------------------------------------------------------------------------------------------------------------------------------------------|------------------------------------------------------------------------------------------------------------------------------------------------------------------------------------------------------------|--------------------------------------------------------------------------------------------------------------------------------------------------------------------------------------------------------------------------------------------------------------------------------------------------------|---------------------------------------------------------------------------------------------------------------------------------------------------------------------|----------|---------------------------------------|----------------------------|----------|
| 792 NCKP1    | NCKP1_HUMAN  | NCKP1; Q5Y3Y5                 | Q9Y2A7; Q5Y3Y5; Q66329; Q5Y3Y5; Q5Y3Y4                                 | NP_038464; NP_995314                    | Nck-associated protein 1 (NAP 1) (p125NAP1) (Membrane-associated protein HEM-2)                                                                                                                                                                                        | GO:0006915; GO:0042995; GO:0074717; GO:0016021; GO:0005886; GO:0005515                                                                                                                                     | apoptosis; cell projection; central nervous system development; integral to membrane; plasma membrane; protein binding                                                                                                                                                                                 | CellmembraneSinglepassmembraneprotein;Cytoplasmicvesicle;Cellprojection;lamellipodiummembraneSinglepassmembraneprotein;Cytoplasmicve                                |          |                                       |                            |          |
| 793 STML2    | STML2_HUMAN  | STML2                         | Q9UJZ1; Q63736; Q53629; Q96FY2; Q9UJZ2                                 | NP_038470                               | Stomatin-like protein 2 (SLP-2) (EP872-like 2)                                                                                                                                                                                                                         | GO:0005856; GO:0005102                                                                                                                                                                                     | cytoskeleton; receptor binding                                                                                                                                                                                                                                                                         | MembranePeripheralmembraneprotein;Cytoplasmicvesicle                                                                                                                |          | Known in Uniprot to be phosphorylated |                            |          |
| 794 CLIC4    | CLIC4_HUMAN  | CLIC4; Q5V5X5; Q6F1C5         | Q9Y696; Q5V5X5; Q9Y699; Q9UJQ6; Q6F1C5                                 | NP_039234                               | Chloride intracellular channel protein 4 (Intracellular chloride ion channel protein p64H1)                                                                                                                                                                            | GO:0015629; GO:0030154; GO:0005886; GO:0006821; GO:0031410; GO:0016030; GO:0005902; GO:0030336; GO:0005515; GO:0005625; GO:0005247                                                                         | actin cytoskeleton; cell differentiation; chloride ion binding; chloride transport; cytoplasmic vesicle; membrane; microvillus; negative regulation of cell migration; protein binding; soluble fraction; voltage-gated chloride channel activity                                                      | Cytoplasmicvesicle;membraneSinglepassmembraneprotein;NucleusCellmembraneSinglepassmembraneprotein                                                                   |          |                                       |                            |          |
| 795 DDAH2    | DDAH2_HUMAN  | DDAH2; A2BEZ7                 | Q95865; A2BEZ7                                                         | NP_039268                               | N(G),N(C)-dimethylarginine dimethylaminohydrolase 2 (Dimethylarginine dimethylaminohydrolase 2) (DDAH-2) (EC 3.5.3.18) (DDAH1) (Dimethylarginine-2) (S-phase protein) (Protein G6a)                                                                                    | GO:0005737; GO:0019941; GO:0005634; GO:0005515; GO:0005625; GO:0005247                                                                                                                                     | anti-apoptosis; arginine catabolic process; dimethylargininase activity; nitric oxide biosynthetic process; nitric oxide mediated signal transduction                                                                                                                                                  |                                                                                                                                                                     |          |                                       |                            |          |
| 796 CYBP     | CYBP_HUMAN   | CYBP; Q3R371                  | Q9H871; Q5K371; B22WH2; Q60666                                         | NP_055227                               | Calcyon-binding protein (CacyBP) (hCacyBP) (Stah-interacting protein) (S100A8-binding protein); Calcyon binding protein (Growth-inhibiting gene 5 protein) (cDNA, FL93790, Homo sapiens Stah-interacting protein (SIP), mRNA) (Calcyon binding protein, isoform CRA_a) | GO:0005737; GO:0005515; GO:0005634; GO:0005515; GO:0005625; GO:0005247                                                                                                                                     | cytoplasm; modification-dependent protein catabolic process; nucleus; protein binding;                                                                                                                                                                                                                 | Nucleus;Cytoplasm;                                                                                                                                                  |          | Known in Uniprot to be phosphorylated |                            |          |
| 797 COR1C    | COR1C_HUMAN  | COR1C; B3KU12                 | Q9ULV4; Q9NSK5; B3KU12                                                 | NP_055140                               | Coronin-1C (Coronin-3) (hCRN4)                                                                                                                                                                                                                                         | GO:0003779; GO:0015639; GO:0006909; GO:0007165                                                                                                                                                             | actin binding; actin cytoskeleton; phagocytosis; signal transduction                                                                                                                                                                                                                                   |                                                                                                                                                                     |          | Known in Uniprot to be phosphorylated |                            |          |
| 798 TFIP8    | TFIP8_HUMAN  | Q9UP47; Q95379; TFIP8; B3KH11 | Q9UP47; Q95379; B3KH11; B3KM12; Q9UP41; B3KMH1; Q9Y2B0; Q9UHE9; B2R7B9 | NP_055165; NP_010191 122                | Tumor necrosis factor, alpha-induced protein 8 (Head and neck tumor and metastasis-related protein) (TNF-induced protein GG2-1) (SCC-S2) (NF-kappa-B-inducible DED-containing protein) (IND1) (MDC-1.13)                                                               | GO:0043027; GO:0005737; GO:0019987; GO:0005515                                                                                                                                                             | capase inhibitor activity; cytoplasm; negative regulation of anti-apoptosis; protein binding;                                                                                                                                                                                                          | Cytoplasm                                                                                                                                                           |          |                                       |                            |          |
| 799 HSAP     | MSAP_HUMAN   | MSAP; CNP17; B2R7B9           | Q9UHE9; B2R7B9                                                         | NP_055070                               | Protein caryop homolog 2 (MIR-interacting saposin like protein) (Transmembrane protein 4) (Putative secreted protein ZS19G)                                                                                                                                            | GO:0005783; GO:0005887; GO:0005515                                                                                                                                                                         | endoplasmic reticulum; integral to plasma membrane; protein binding                                                                                                                                                                                                                                    | Endoplasmicreticulum                                                                                                                                                |          |                                       |                            |          |
| 800 LSM1     | LSM1_HUMAN   | LSM1; B2R5E6                  | Q15118; B2R5E6                                                         | NP_055277                               | U6 snRNP-associated Sm-like protein LSM1 (Cancer-associated Sm-like) (Small nuclear ribonuclear CaSm)                                                                                                                                                                  | GO:0003723; GO:0008380; GO:0031202; GO:0005737; GO:0006397; GO:0005634; GO:0005515; GO:0000064; GO:0006520; GO:0005488; GO:0016021; GO:0005743; GO:0000066; GO:0000050; GO:0005488; GO:0006610; GO:0005215 | RNA binding; RNA splicing; RNA splicing factor activity; transfection mechanism; cytoplasm; mRNA processing; nucleus; protein binding; ribonucleoprotein complex                                                                                                                                       | Nucleus                                                                                                                                                             |          |                                       |                            |          |
| 801 ORNT1    | ORNT1_HUMAN  | ORNT1; Q5VZD8                 | Q9Y619; Q5VZD8; Q9K4C5                                                 | NP_055067                               | Mitochondrial ornithine transporter 1 (Solute carrier family 25 member 15); Solute carrier family 25 (Mitochondrial carrier, ornithine transporter) member 15                                                                                                          | GO:0000064; GO:0006520; GO:0005488; GO:0016021; GO:0005743; GO:0000066; GO:0000050; GO:0005488; GO:0006610; GO:0005215                                                                                     | L-ornithine transmembrane transporter activity; amino acid metabolic process; binding; integral to membrane; mitochondrial inner membrane; mitochondrial ornithine transport; urea cycle; binding; transport; transporter activity                                                                     | MitochondrioninnermembraneMulti-passmembraneprotein                                                                                                                 |          |                                       |                            |          |
| 802 TMOD2    | TMOD2_HUMAN  | TMOD2                         | Q9NZR1                                                                 | NP_055363                               | Tropomodulin-2 (Neuronal tropomodulin) (N-Tmod)                                                                                                                                                                                                                        | GO:0003779; GO:0005737; GO:0005856; GO:0007399; GO:0005739                                                                                                                                                 | actin binding; cytoplasm; cytoskeleton; nervous system development; tropomyosin binding                                                                                                                                                                                                                | Cytoplasm;cytoskeleton                                                                                                                                              |          |                                       |                            |          |
| 803 BR44     | BR44_HUMAN   | BR44                          | Q95563; Q35835; ABK261; Q6F1F3                                         | NP_056230; NP_001137 146                | Brain protein 44                                                                                                                                                                                                                                                       | GO:0003723; GO:0008380; GO:0031202; GO:0005737; GO:0005856; GO:0007399; GO:0005739                                                                                                                         | RNA binding; RNA splicing; RNA splicing factor activity; transfection mechanism; cytoplasm; mRNA processing; nucleus; protein binding; ribonucleoprotein complex                                                                                                                                       | Nucleus                                                                                                                                                             |          |                                       |                            |          |
| 804 HIG1A    | HIG1A_HUMAN  | HIG1A                         | Q9Y241; Q9UF22                                                         | NP_054775; NP_001093 138; NP_0010931 39 | HIG1 domain family member 1A (Hypoxia-inducible gene 1 protein)                                                                                                                                                                                                        | GO:0016021; GO:0005515; GO:0043234; GO:0006950                                                                                                                                                             | integral to membrane; protein binding; protein complex; response to stress                                                                                                                                                                                                                             | MembraneMulti-passmembraneprotein                                                                                                                                   |          |                                       |                            |          |
| 805 MAP1P    | MAP1P_HUMAN  | MAP1P                         | Q9Y2Q5; Q9Y9Y7; Q9Y999                                                 | NP_054736                               | Mitogen-activated protein-binding protein-interacting protein (Late endosome/lysosomal Mpl-interacting protein) (Roadblock domain-containing protein 3) (p14)                                                                                                          | GO:0031902; GO:0005765                                                                                                                                                                                     | late endosome membrane; lysosomal membrane                                                                                                                                                                                                                                                             | LateendosomemembranePeripheralmembraneprotein;Cytoplasmicvesicle;LysosomemembranePeripheralmembraneprotein;Cytoplasmicvesicle                                       |          |                                       |                            |          |
| 806 RAB21    | RAB21_HUMAN  | RAB21                         | Q9UL25; Q959H3; Q14466                                                 | NP_055814                               | Ras-related protein Rab-21                                                                                                                                                                                                                                             | GO:0005525; GO:0000139; GO:0005768; GO:0015031; GO:0007264                                                                                                                                                 | GTP binding; Golgi membrane; endosome; protein transport; small GTPase mediated signal transduction                                                                                                                                                                                                    | Endoplasmicreticulummembrane;lipidanchorgolgiapparatusmembranemembraneSinglepassmembraneCytoplasmicvesiclemembrane                                                  |          |                                       |                            |          |
| 807 K0152    | K0152_HUMAN  | K0152; MLEC                   | Q14165                                                                 | NP_055545                               | Malectin                                                                                                                                                                                                                                                               | GO:0030246; GO:0005975; GO:0005789; GO:0007223; GO:0005786; GO:0008284; GO:0040008; GO:0006355; GO:0010008; GO:0005887; GO:0005765; GO:0005624                                                             | carbohydrate binding; carbohydrate metabolic process; endoplasmic reticulum membrane; integral to membrane; cytoplasm; negative regulation of cell cycle; positive regulation of cell proliferation; regulation of growth; regulation of transcription; DNA-dependent; response to DNA damage stimulus | EndoplasmicreticulummembraneSinglepassmembraneprotein                                                                                                               |          | Known in Uniprot to be phosphorylated |                            |          |
| 808 MCTS1    | MCTS1_HUMAN  | Q9ULC4; MCTS1                 | Q9ULC4; Q5QX26                                                         | NP_054779                               | Malignant T cell amplified sequence 1 (MCT-1) (Multiple copies T-cell malignancies)                                                                                                                                                                                    | GO:0006355; GO:0010008; GO:0005887; GO:0005765; GO:0005624                                                                                                                                                 | endosome membrane; integral to plasma membrane; lysosomal membrane; membrane fraction                                                                                                                                                                                                                  | CellmembraneSinglepassmembraneprotein;Intracellularmembraneprotein;LysosomemembraneSinglepassmembraneprotein                                                        |          |                                       |                            |          |
| 809 LAMP1    | LAMP1_HUMAN  | Q8WUJ3; LAMP1                 | P11279; Q8WUJ3; Q96H00; Q98B02; Q9NP13                                 | NP_005552                               | Lysosome-associated membrane glycoprotein 1 (LAMP-1) (CD107 antigen-like family member A) (CD antigen CD107a)                                                                                                                                                          | GO:0006355; GO:0010008; GO:0005887; GO:0005765; GO:0005624                                                                                                                                                 | endosome membrane; integral to plasma membrane; lysosomal membrane; membrane fraction                                                                                                                                                                                                                  | CellmembraneSinglepassmembraneprotein;Intracellularmembraneprotein;LysosomemembraneSinglepassmembraneprotein                                                        |          |                                       |                            |          |
| 810 SPN90    | SPN90_HUMAN  | SPN90                         | Q9H2Q3; Q9UJG8                                                         | NP_057537                               | NCK-interacting protein with SH3 domain (SH3 adapter protein SPN90) (SH3 protein interacting with Nck, 90 kDa) (Vaca-interacting protein, 54 kDa) (VIP54) (AF3p21) (Diaphanous protein-interacting protein) (Dna-interacting protein 1) (DIP-1)                        | GO:0006607; GO:0017124; GO:0008092; GO:0007010; GO:0005882; GO:0005634; GO:0007165                                                                                                                         | NLS-bearing substrate import into nucleus; SH3 domain protein binding; cytoskeletal protein binding; cytoskeleton organization; intermediate filament; nucleus; signal transduction                                                                                                                    |                                                                                                                                                                     |          | Known in Uniprot to be phosphorylated |                            |          |
| 811 UFM1     | UFM1_HUMAN   | UFM1                          | P61960; Q14344; Q61AG6; Q9CPK2; Q9NZF2                                 | NP_057701                               | Ubiquitin-fold modifier 1                                                                                                                                                                                                                                              | GO:0005737; GO:0019941; GO:0005634; GO:0005515                                                                                                                                                             | cytoplasm; modification-dependent protein catabolic process; nucleus; protein binding                                                                                                                                                                                                                  | Nucleus;Cytoplasm                                                                                                                                                   |          |                                       |                            |          |
| 812 COPB     | COPB_HUMAN   | COPB                          | Q6GTT7; P53618; Q9NTC2; Q9UNW7                                         | NP_057535; NP_001137 533; NP_0011375 34 | Coatomer subunit beta (Beta-coat protein) (Beta-COP)                                                                                                                                                                                                                   | GO:0048205; GO:0030126; GO:0019929; GO:0044419; GO:0006891; GO:0006886; GO:0005515; GO:0006890; GO:0016021; GO:0031966                                                                                     | COPII coating of Golgi vesicle; COPII vesicle coat; cytosol; interspecies interaction between organisms; intra-Golgi vesicle-mediated transport; intracellular protein transport; protein binding; retrograde vesicle-mediated transport; Golgi to ER; structural molecule activity                    | CytoplasmGolgiapparatusmembranePeripheralmembraneprotein;Cytoplasmicvesicle;Cytoplasmicvesicle;COPIIcoatvesiclemembranePeripheralmembraneprotein;Cytoplasmicvesicle |          |                                       |                            |          |
| 813 TM14C    | TM14C_HUMAN  | TM14C; Q5T46                  | Q9P059; Q5T46                                                          | NP_057546                               | Transmembrane protein 14C; Transmembrane protein 14C (Transmembrane protein 14C, isoform CRA_a)                                                                                                                                                                        | GO:0006915; GO:0031307; GO:0002666; GO:0016559; GO:0005737; GO:0005515                                                                                                                                     | apoptosis; integral to mitochondrial outer membrane; integral to peroxisomal membrane; mitochondrial fission; peroxisome fission; protein binding                                                                                                                                                      | MitochondrionoutermembraneSinglepassmembraneprotein;PeroxisomemembraneSinglepassmembraneprotein                                                                     |          |                                       |                            |          |
| 814 FIS1     | FIS1_HUMAN   | FIS1                          | Q9Y3D6; Q9BTP3                                                         | NP_057152                               | Mitochondrial fission 1 protein (Fis1 homolog) (Fis1) (Tetrapeptide repeat protein 11) (TPR repeat protein 11)                                                                                                                                                         | GO:0006915; GO:0031307; GO:0002666; GO:0016559; GO:0005737; GO:0005515                                                                                                                                     | apoptosis; integral to mitochondrial outer membrane; integral to peroxisomal membrane; mitochondrial fission; peroxisome fission; protein binding                                                                                                                                                      | MitochondrionoutermembraneSinglepassmembraneprotein;PeroxisomemembraneSinglepassmembraneprotein                                                                     |          |                                       |                            |          |
| 815 BOLA1    | BOLA1_HUMAN  | BOLA1; B2R7K2                 | Q9Y3E2; Q5QNY0; B2R7K2                                                 | NP_057158                               | Bola-like protein 1                                                                                                                                                                                                                                                    | GO:0005737; GO:0005515                                                                                                                                                                                     | cytoplasm; nucleus; protein binding                                                                                                                                                                                                                                                                    |                                                                                                                                                                     |          | Known in Uniprot to be phosphorylated |                            |          |
| 816 GSTK1    | GSTK1_HUMAN  | GSTK1; Q6F1I1                 | Q9Y2Q3; Q6F1I1; Q9Y2Q3; Q9Y154                                         | NP_057001                               | Glutathione S-transferase kappa 1 (EC 2.5.1.18) (GST class-kappa) (GSTK1-1) (hGSTK1); LOC31064 protein (cDNA FL37809) (Glutathione S-transferase kappa 1) (Glutathione S-transferase kappa 1, isoform CRA_d)                                                           | GO:0004364; GO:0042802; GO:0030289; GO:0005777; GO:0015035; GO:0030288; GO:0016740; GO:0005794; GO:0005789; GO:0016021                                                                                     | glutathione transferase activity; identical protein binding; outer membrane-bounded periplasmic space; peroxisome; protein disulfide oxidoreductase activity; outer membrane-bounded periplasmic space; transference activity                                                                          | Peroxisome;                                                                                                                                                         |          |                                       |                            |          |
| 817 IR3IP    | IR3IP_HUMAN  | IR3IP                         | Q9Y5U9                                                                 | NP_057181                               | Immediate early response 3-interacting protein 1                                                                                                                                                                                                                       | GO:0005789; GO:0016021                                                                                                                                                                                     | Golgi apparatus; endoplasmic reticulum membrane; integral to membrane                                                                                                                                                                                                                                  | EndoplasmicreticulummembraneMulti-passmembraneprotein                                                                                                               |          |                                       |                            |          |
| 818 RAB9B    | RAB9B_HUMAN  | RAB9B                         | Q9NP90; Q52LX2; B2R8M0                                                 | NP_057454                               | Ras-related protein Rab-9B (Rab-9L) (RAB9-like protein)                                                                                                                                                                                                                | GO:0005525; GO:0006895; GO:0005886; GO:0015031; GO:0007264                                                                                                                                                 | GTP binding; Golgi to endosome transport; plasma membrane; protein transport; small GTPase mediated signal transduction                                                                                                                                                                                | Cellmembrane;lipidanchorgolgiapparatusmembrane                                                                                                                      |          |                                       |                            |          |
| 819 PTH2     | PTH2_HUMAN   | PTH2; B3KU4Y                  | Q9Y3E5; Q9RTES; B3KU4Y                                                 | NP_057161                               | Peptidyl-RNA hydrolase 2, mitochondrial (PTH 2) (EC 3.1.1.29) (Bci-2 inhibitor of transcription 1)                                                                                                                                                                     | GO:0004045; GO:0006915; GO:0005739; GO:0006412                                                                                                                                                             | aminoacyl-RNA hydrolase activity; apoptosis; mitochondrion; translation                                                                                                                                                                                                                                | Mitochondrion                                                                                                                                                       |          | Known in Uniprot to be phosphorylated |                            |          |
| 820 TPC2L    | TPC2L_HUMAN  | Q9UL33; TPC2L                 | Q9UL33; B2R4M9; Q6ZTA7; Q9NZ24                                         | NP_057293                               | Trafficking protein particle complex subunit 2-like protein                                                                                                                                                                                                            | GO:0005737; GO:0005515                                                                                                                                                                                     | ER to Golgi vesicle-mediated transport; intracellular                                                                                                                                                                                                                                                  |                                                                                                                                                                     |          |                                       |                            |          |
| 821 TRAP1    | TRAP1_HUMAN  | TRAP1                         | Q43642; Q75235; Q9NHL5                                                 | NP_057376                               | Heat shock protein 75 kDa, mitochondrial (HSP 75) (Tumor necrosis factor type 1 receptor-associated protein) (TRAP-1) (TNFR-associated protein 1)                                                                                                                      | GO:0005524; GO:0005739; GO:0006657; GO:0006950; GO:0005164; GO:0005102                                                                                                                                     | ATP binding; mitochondrion; protein folding; response to stress; tumor necrosis factor receptor binding; unfolded protein binding;                                                                                                                                                                     | Mitochondrion                                                                                                                                                       |          | Known in Uniprot to be phosphorylated |                            |          |
| 822 DJB11    | DJB11_HUMAN  | DJB11; Q542Y5                 | Q9UB54; Q542Y5; Q542Y9; Q61AQ8; Q9583C                                 | NP_057390                               | DnaJ homolog subfamily B member 11 (ER-associated dnaJ protein 3) (ERJ3p) (ERJ3) (ER-associated Hsp40 co-chaperone) (ER-associated DnaJ) (HEJ2) (Hdj9) (PWT1-interacting protein 4) (APOBEC1-binding protein 2) (ABBP-2)                                               | GO:0005524; GO:0005739; GO:0006657; GO:0006950; GO:0005164; GO:0005102                                                                                                                                     | endoplasmic reticulum; endoplasmic reticulum lumen; heat shock protein binding; protein folding; unfolded protein binding                                                                                                                                                                              | Endoplasmicreticulumlumen                                                                                                                                           |          |                                       |                            |          |



| Protein Name | Uniprot Name | Other Names           | Uniprot ID                                             | Refseq IDs                                | Protein Description                                                                                                                                                                                                                                                                                                                                                                                                                                                                                                                                                                                                                                                   | GO ID                                                                                                                                                                                                                                                     | GO terms                                                                                                                                                                                                                                                                                                                                                                                                                                                                                                                                                                    | Subcellular location                                                  | Comments | Comments - Database Search | Comments - Database Search | Function                              |
|--------------|--------------|-----------------------|--------------------------------------------------------|-------------------------------------------|-----------------------------------------------------------------------------------------------------------------------------------------------------------------------------------------------------------------------------------------------------------------------------------------------------------------------------------------------------------------------------------------------------------------------------------------------------------------------------------------------------------------------------------------------------------------------------------------------------------------------------------------------------------------------|-----------------------------------------------------------------------------------------------------------------------------------------------------------------------------------------------------------------------------------------------------------|-----------------------------------------------------------------------------------------------------------------------------------------------------------------------------------------------------------------------------------------------------------------------------------------------------------------------------------------------------------------------------------------------------------------------------------------------------------------------------------------------------------------------------------------------------------------------------|-----------------------------------------------------------------------|----------|----------------------------|----------------------------|---------------------------------------|
| 823 KCY      | KCY_HUMAN    | KCY; B2R655           | P30885; Q53G87; Q55V20; Q95C07; Q9UBQ8; Q9UJ42; B2R655 | NP_057392; NP_001129; 612                 | UMP-CMP kinase (EC 2.7.4.14) (Cytidylylase kinase) (Deoxycytidylylase kinase) (Cytidine monophosphate kinase) (Uridine monophosphate kinase) (Uridine monophosphate/cytidine monophosphate kinase) (UMP/CMP kinase) (UMP/CMK)                                                                                                                                                                                                                                                                                                                                                                                                                                         | GO:000524; GO:0004127; GO:0005737; GO:0005634; GO:0016776; GO:0009220; GO:0004849                                                                                                                                                                         | ATP binding; cytidylylase kinase activity; cytoplasm; nucleus; phosphotransferase activity; phosphate group as acceptor; pyrimidine ribonucleotide biosynthetic process; uridine kinase activity                                                                                                                                                                                                                                                                                                                                                                            | Nucleus;Cytoplasm                                                     |          |                            |                            | Kinase                                |
| 824 RAB8B    | RAB8B_HUMAN  | RAB8B; Q53PC4         | Q92930; Q53PC4; Q92929                                 | NP_057614                                 | Ras-related protein Rab-8B; Putative uncharacterized protein DKFZ2667F1514 (cDNA FL110249 fs, clone HEMBB1000725, highly similar to Ras-related protein Rab-8B)                                                                                                                                                                                                                                                                                                                                                                                                                                                                                                       | GO:000525; GO:0003924; GO:0005886; GO:0005515; GO:0007264                                                                                                                                                                                                 | GTP binding; GTPase activity; plasma membrane; protein binding; protein transport; small GTPase mediated signal transduction                                                                                                                                                                                                                                                                                                                                                                                                                                                | CellMembrane;Lipidanc hor;Cytoplasm;side;transduction                 |          |                            |                            |                                       |
| 825 CALL5    | CALL5_HUMAN  | CALL5; Q53H37         | Q9NZT1; Q55Q33; Q8URX8; Q53H37                         | NP_059118                                 | Calmodulin-like protein 5 (Calmodulin-like skin protein)                                                                                                                                                                                                                                                                                                                                                                                                                                                                                                                                                                                                              | GO:0005509; GO:0008544; GO:0005515; GO:0007165                                                                                                                                                                                                            | calcium ion binding; epidermis development; protein binding; signal transduction                                                                                                                                                                                                                                                                                                                                                                                                                                                                                            |                                                                       |          |                            |                            |                                       |
| 826 RNZ1     | RNZ1_HUMAN   | RNZ1                  | Q9H777; Q9H599                                         | NP_061166                                 | Zinc phosphodiesterase ELAC protein 1 (EC 3.1.26.11) (Ribonuclease Z 1) (RNase Z 1) (RNA 3' endonuclease 1) (ElaC homolog protein 1) (Deleted in M29)                                                                                                                                                                                                                                                                                                                                                                                                                                                                                                                 | GO:0004519; GO:0000634; GO:0008033; GO:0008270                                                                                                                                                                                                            | endonuclease activity; nucleus; tRNA processing; zinc ion binding                                                                                                                                                                                                                                                                                                                                                                                                                                                                                                           | Nucleus                                                               |          |                            |                            |                                       |
| 827 NECP2    | NECP2_HUMAN  | NECP2                 | Q9NVZ3; Q5VU14; Q5VU50; Q9H711                         | NP_060560; NP_001138; 749                 | Adaptin ear-binding coat-associated protein 2 (NECAP-2)                                                                                                                                                                                                                                                                                                                                                                                                                                                                                                                                                                                                               | GO:0030125; GO:0005905; GO:0006897; GO:0015031                                                                                                                                                                                                            | clathrin vesicle coat; coated pit; endocytosis; protein transport                                                                                                                                                                                                                                                                                                                                                                                                                                                                                                           | Cytoplasm;vesiclediat hr;coatedvesiclelem brane;Cellmembrane          |          |                            |                            |                                       |
| 828 RT18A    | RT18A_HUMAN  | RT18A                 | Q9HBL1; Q9HVS2                                         | NP_060605                                 | 28S ribosomal protein S18a, mitochondrial (MRP-S18-a) (Mrps18a) (MRP-S18-3)                                                                                                                                                                                                                                                                                                                                                                                                                                                                                                                                                                                           | GO:0005763; GO:0003735; GO:0006412                                                                                                                                                                                                                        | mitochondrial small ribosomal subunit; structural constituent of ribosome; translation                                                                                                                                                                                                                                                                                                                                                                                                                                                                                      | Mitochondrion                                                         |          |                            |                            |                                       |
| 829 ARL8B    | ARL8B_HUMAN  | ARL8B                 | Q9HVV2                                                 | NP_060654                                 | ADP-ribosylation factor-like protein 8B (ADP-ribosylation factor-like protein 8C) (Novel small G protein indispensable for equal chromosome segregation 1)                                                                                                                                                                                                                                                                                                                                                                                                                                                                                                            | GO:0019003; GO:0005525; GO:0003924; GO:0043014; GO:0048487; GO:0007059; GO:0013102; GO:0005765; GO:0003496; GO:0007264; GO:0005622; GO:0005515; GO:0008270                                                                                                | GDP binding; GTP binding; GTPase activity; alpha-tubulin binding; beta-tubulin binding; chromosome segregation; late endosome membrane; lysosomal membrane; midbody; small GTPase mediated signal transduction; spindle midzone                                                                                                                                                                                                                                                                                                                                             | Lateendosome;membrana netysosome;membrana                             |          |                            |                            |                                       |
| 830 TRI62    | TRI62_HUMAN  | TRI62; B3KVV5         | Q9NVG0; Q9BVG3; B3KVV5                                 | NP_060677                                 | Tripartite motif-containing protein 62                                                                                                                                                                                                                                                                                                                                                                                                                                                                                                                                                                                                                                | GO:0005634; GO:0006355; GO:0003700; GO:0005515; GO:0008270                                                                                                                                                                                                | nucleus; regulation of transcription, DNA-dependent; transcription factor activity; zinc ion binding                                                                                                                                                                                                                                                                                                                                                                                                                                                                        | Nucleus                                                               |          |                            |                            |                                       |
| 831 CNDP2    | CNDP2_HUMAN  | CNDP2                 | Q96KPA; Q96Q94; Q9HVB4                                 | NP_060705                                 | Cytosolic non-specific dipeptidase (CNDP dipeptidase 2) (Glutamate carboxypeptidase-like protein 1) (Peptidase A)                                                                                                                                                                                                                                                                                                                                                                                                                                                                                                                                                     | GO:0004180; GO:0008237; GO:0004983; GO:0006508; GO:0008270                                                                                                                                                                                                | carboxypeptidase activity; metalloprotease activity; protein dimerization activity; proteolysis; zinc ion binding                                                                                                                                                                                                                                                                                                                                                                                                                                                           |                                                                       |          |                            |                            |                                       |
| 832 CA106    | CA106_HUMAN  | CA106                 | Q9NVU5; Q3KP66; Q9NV10                                 | NP_060830                                 | Uncharacterized protein C1orf106                                                                                                                                                                                                                                                                                                                                                                                                                                                                                                                                                                                                                                      | GO:0005737                                                                                                                                                                                                                                                | cytoplasm                                                                                                                                                                                                                                                                                                                                                                                                                                                                                                                                                                   |                                                                       |          |                            |                            |                                       |
| 833 TXLNG    | TXLNG_HUMAN  | TXLNG                 | Q9HNC2; Q5INZ7; Q9PX11                                 | NP_060830                                 | Gamma-taxilin (Lipopolysaccharide-specific response protein 5)                                                                                                                                                                                                                                                                                                                                                                                                                                                                                                                                                                                                        | GO:0007126                                                                                                                                                                                                                                                | meiosis                                                                                                                                                                                                                                                                                                                                                                                                                                                                                                                                                                     |                                                                       |          |                            |                            | Known in Uniprot to be phosphorylated |
| 834 MNS1     | MNS1_HUMAN   | Q9NUP4; MNS1          | Q9NUP4; Q8NEH6; Q8NY76                                 | NP_060835                                 | Meiosis-specific nuclear structural protein 1                                                                                                                                                                                                                                                                                                                                                                                                                                                                                                                                                                                                                         | GO:0007126                                                                                                                                                                                                                                                | meiosis                                                                                                                                                                                                                                                                                                                                                                                                                                                                                                                                                                     |                                                                       |          |                            |                            | Known in Uniprot to be phosphorylated |
| 835 ZN407    | ZN407_HUMAN  | ZN407                 | Q9NND7; Q9CGD0; Q96MY0; Q9HBA1; Q9NXD4                 | NP_060227; NP_001139; 661; NP_0011396; 62 | Zinc finger protein 407                                                                                                                                                                                                                                                                                                                                                                                                                                                                                                                                                                                                                                               | GO:003677; GO:0005634; GO:0006355; GO:0008270                                                                                                                                                                                                             | DNA binding; nucleus; regulation of transcription, DNA-dependent; zinc ion binding                                                                                                                                                                                                                                                                                                                                                                                                                                                                                          | Nucleus                                                               |          |                            |                            |                                       |
| 836 CHCH3    | CHCH3_HUMAN  | CHCH3                 | Q9NX63                                                 | XP_028225; NP_060282                      | Coiled-coil-helix-coiled-coil-helix domain-containing protein 3, mitochondrial                                                                                                                                                                                                                                                                                                                                                                                                                                                                                                                                                                                        | GO:0005515                                                                                                                                                                                                                                                | protein binding                                                                                                                                                                                                                                                                                                                                                                                                                                                                                                                                                             | Mitochondrion                                                         |          |                            |                            | Known in Uniprot to be phosphorylated |
| 837 CA123    | CA123_HUMAN  | CA123                 | Q9NW44                                                 | NP_060378                                 | UPO587 protein C1orf123                                                                                                                                                                                                                                                                                                                                                                                                                                                                                                                                                                                                                                               | GO:0005634; GO:0006355; GO:0003700; GO:0005515; GO:0008270                                                                                                                                                                                                | nucleus; regulation of transcription, DNA-dependent; transcription factor activity; zinc ion binding                                                                                                                                                                                                                                                                                                                                                                                                                                                                        | Nucleus                                                               |          |                            |                            |                                       |
| 838 ZN446    | ZN446_HUMAN  | ZN446                 | Q9NUG3; A6NNL6; Q55XD7                                 | NP_060055                                 | Solute carrier family 2, facilitated glucose transporter member 6 (Glucose transporter type 6) (GLUT-6) (Glucose transporter type 9) (GLUT-9)                                                                                                                                                                                                                                                                                                                                                                                                                                                                                                                         | GO:0005515; GO:0005886; GO:0005351; GO:0016787                                                                                                                                                                                                            | integral to membrane; plasma membrane; sugar/hydrogen symporter activity; transmembrane transport hydrolyase activity                                                                                                                                                                                                                                                                                                                                                                                                                                                       | Cellmembrane;Multipas smembrane;protein                               |          |                            |                            | Known in Uniprot to be phosphorylated |
| 840 THEM2    | THEM2_HUMAN  | THEM2                 | Q9NPF3; Q95549                                         | NP_060943                                 | Thioesterase superfamily member 2                                                                                                                                                                                                                                                                                                                                                                                                                                                                                                                                                                                                                                     | GO:0007015; GO:0000917; GO:0007049; GO:0005737; GO:0008093; GO:0005856; GO:0008104; GO:0016021; GO:0009206; GO:0005739                                                                                                                                    | actin filament organization; barrier septum formation; cell cycle; cytoplasm; cytoskeletal adaptor activity; cytoskeleton; protein localization; unidimensional cell growth                                                                                                                                                                                                                                                                                                                                                                                                 | Cytoplasm;cytoskeleton                                                |          |                            |                            |                                       |
| 841 BIN3     | BIN3_HUMAN   | BIN3                  | Q9NYY0; Q9NYY9                                         | NP_061158                                 | Bridging integrator 3                                                                                                                                                                                                                                                                                                                                                                                                                                                                                                                                                                                                                                                 | GO:0005634; GO:0009206; GO:0005739                                                                                                                                                                                                                        | integral to membrane; mitochondrion                                                                                                                                                                                                                                                                                                                                                                                                                                                                                                                                         | Membrane;Multipasme mbrane;protein Secreted;                          |          |                            |                            |                                       |
| 842 C1046    | C1046_HUMAN  | C1046                 | Q9HBL7; Q9NZ44                                         | NP_060935                                 | Transmembrane protein C9orf46                                                                                                                                                                                                                                                                                                                                                                                                                                                                                                                                                                                                                                         | GO:0005634; GO:0006355; GO:0003700; GO:0005515; GO:0008270                                                                                                                                                                                                | nucleus; regulation of transcription, DNA-dependent; transcription factor activity; zinc ion binding                                                                                                                                                                                                                                                                                                                                                                                                                                                                        | Nucleus                                                               |          |                            |                            |                                       |
| 843 AIAG1    | AIAG1_HUMAN  | AIAG1; Q5U067; Q5T539 | Q5U067; Q8TC16; Q5T539                                 | NP_000598                                 | Alpha-1-acti glycoprotein 1 (AGP 1) (Orosomucoid 1) (OMD 1); Orosomucoid 1 (cDNA, FLJ92312, Homo sapiens orosomucoid 1) (ORM1, mRNA)                                                                                                                                                                                                                                                                                                                                                                                                                                                                                                                                  | GO:0006953; GO:0005615; GO:0005515; GO:0002682; GO:0005488                                                                                                                                                                                                | acute-phase response; extracellular space; protein binding; regulation of immune system process; binding                                                                                                                                                                                                                                                                                                                                                                                                                                                                    |                                                                       |          |                            |                            |                                       |
| 844 TBAB     | TBAB_HUMAN   | TBAB; B2RXC2          | Q9HY65; Q2M3N4; B2RXC2                                 | NP_061816                                 | Tubulin alpha-8 chain (Alpha-tubulin 8) (Tubulin alpha chain-like 2)                                                                                                                                                                                                                                                                                                                                                                                                                                                                                                                                                                                                  | GO:000525; GO:0003924; GO:0008074; GO:0007018; GO:0043234; GO:0012586; GO:0007160; GO:0008205; GO:0007239; GO:0044419; GO:0005515; GO:0004872                                                                                                             | GTP binding; GTPase activity; microtubule; microtubule-based movement; protein complex; protein polymerization; structural molecule activity                                                                                                                                                                                                                                                                                                                                                                                                                                |                                                                       |          |                            |                            | Known in Uniprot to be phosphorylated |
| 845 ITB6     | ITB6_HUMAN   | ITB6; B2R9W5          | P18564; Q0VA95; Q15500; Q53RC5; Q53R86; B2R9W5         | NP_000879                                 | Integrin beta-6                                                                                                                                                                                                                                                                                                                                                                                                                                                                                                                                                                                                                                                       | GO:0005634; GO:0008635; GO:0005829; GO:0005515; GO:0005739; GO:0005515; GO:0005198                                                                                                                                                                        | cell-matrix adhesion; integrin complex; integrin-mediated signaling pathway; interspecies interaction between organisms; protein binding; receptor activity                                                                                                                                                                                                                                                                                                                                                                                                                 | Membrane;Singlepassty pelmembrane;protein                             |          |                            |                            |                                       |
| 846 DBL0H    | DBL0H_HUMAN  | DBL0H                 | Q9NR28; B2RQD0; Q9LW10; Q9BT11; Q9HAW6                 | NP_063940; NP_020307                      | Diablo homolog, mitochondrial (Second mitochondria-derived activator of caspase) (Smac protein) (Direct IAP-binding protein with low pI)                                                                                                                                                                                                                                                                                                                                                                                                                                                                                                                              | GO:0008635; GO:0005829; GO:0005515; GO:0005739; GO:0005515                                                                                                                                                                                                | activation of caspase activity by cytochrome c; cytosol; induction of apoptosis via death domain receptors; mitochondrion; protein binding                                                                                                                                                                                                                                                                                                                                                                                                                                  | Mitochondrion                                                         |          |                            |                            |                                       |
| 847 LAMB2    | LAMB2_HUMAN  | LAMB2                 | P55268; Q16321                                         | NP_002283                                 | Laminin subunit beta-2 (S-laminin) (Laminin B1s chain)                                                                                                                                                                                                                                                                                                                                                                                                                                                                                                                                                                                                                | GO:0005605; GO:0007155; GO:0005783; GO:0005634; GO:0005515; GO:0005198                                                                                                                                                                                    | basal lamina; cell adhesion; endoplasmic reticulum; nucleus; protein binding; structural molecule activity                                                                                                                                                                                                                                                                                                                                                                                                                                                                  | Secreted;extracellular matrix;tracellularmatrix; xbsmembrane;membrana |          |                            |                            |                                       |
| 848 RAC1     | RAC1_HUMAN   | RAC1; A4D2P1          | P63000; Q51AAB; Q95501; P15154; Q3Y4D3; Q9BT84; A4D2P1 | XP_171081; NP_008839                      | Ras-related C3 botulinum toxin substrate 1 (p21-Rac1) (Ras-like protein TC25) (Cell migration-inducing gene 5 protein); Ras-related C3 botulinum toxin substrate 1 isoform Rac1 (cDNA FL130431 fs, clone BRACE2008968, highly similar to Ras-related C3 botulinum toxin substrate 1) (cDNA FL175553, highly similar to Homo sapiens ras-related C3 botulinum toxin substrate 1 (rho family, small GTP binding protein Rac1) (RAC1), transcript variant Rac1, mRNA) (Ras-related C3 botulinum toxin substrate 1 (Rho family, small GTP binding protein Rac1)) (Ras-related C3 botulinum toxin substrate 1 (Rho family, small GTP binding protein Rac1), isoform CRA_a) | GO:000525; GO:0003742; GO:0003924; GO:0003004; GO:0007155; GO:0006928; GO:0008093; GO:0019899; GO:0006959; GO:0051686; GO:0042470; GO:0048251; GO:0005886; GO:0035025; GO:0010592; GO:0010310; GO:0006263; GO:0013129; GO:0005622; GO:0016000; GO:0007264 | GTP binding; GTP-dependent protein binding; GTPase activity; actin filament polymerization; cell adhesion; cell motion; cytosol; enzyme binding; inflammatory response; localization within membrane; melanosome; negative regulation of receptor-mediated endocytosis; plasma membrane; positive regulation of rho protein signal transduction; positive regulation of lamellipodium assembly; regulation of hydrogen peroxide metabolic process; regulation of respiratory burst; ruffle organization; intracellular; membrane; small GTPase mediated signal transduction | Cellmembrane;Lipidanc hor;Cytoplasm;side;Mel anosome;                 |          |                            |                            | Known in Uniprot to be phosphorylated |
| 849 OTU7B    | OTU7B_HUMAN  | OTU7B; Q5S260         | Q6GQ09; Q8WAA7; Q9HQS3; Q9HFT4; Q5S260                 | NP_064590                                 | OTU domain-containing protein 7B (EC 3.-.-.) (Zinc finger protein Cezanne) (Zinc finger A20 domain-containing protein 1) (Cellular zinc finger anti-NF-kappa-B protein); OTU domain containing 7B (Zinc finger, A20 domain containing 1, isoform CRA_a)                                                                                                                                                                                                                                                                                                                                                                                                               | GO:0003677; GO:0008234; GO:0005737; GO:0019941; GO:0043124; GO:0005634; GO:0005515; GO:0008270; GO:0016579; GO:0004221                                                                                                                                    | DNA binding; cysteine-type peptidase activity; cytoplasm; modification-dependent protein catabolic process; negative regulation of I-kappaB kinase/NF-kappaB cascade; nucleus; protein binding; zinc ion binding; protein deubiquitination; ubiquitin thioesterase activity                                                                                                                                                                                                                                                                                                 | Cytoplasm;Nucleus;                                                    |          |                            |                            | Known in Uniprot to be phosphorylated |
| 850 OTOR     | OTOR_HUMAN   | OTOR                  | Q9NRC9; Q3MIU6                                         | NP_064542                                 | Otoraplin (Fibrocyte-derived protein) (Melanoma inhibitor activin-like protein)                                                                                                                                                                                                                                                                                                                                                                                                                                                                                                                                                                                       | GO:0005576; GO:0007605                                                                                                                                                                                                                                    | extracellular region; sensory perception of sound                                                                                                                                                                                                                                                                                                                                                                                                                                                                                                                           | Secreted                                                              |          |                            |                            |                                       |
| 851 SAR1A    | SAR1A_HUMAN  | SAR1A; Q55Q79         | Q9NRC1; Q55Q79                                         | NP_064535; NP_001136; 120                 | GTP-binding protein SAR1A (COPII-associated small GTPase); SAR1 gene homolog A (S. cerevisiae) (Small GTP-binding protein) (SAR1 gene homolog A (S. cerevisiae), isoform CRA_a)                                                                                                                                                                                                                                                                                                                                                                                                                                                                                       | GO:0006888; GO:0005525; GO:0003924; GO:0005634; GO:0005515; GO:0008270; GO:0016579; GO:0005576; GO:0007605                                                                                                                                                | ER to Golgi vesicle-mediated transport; GTP binding; GTPase activity; Golgi apparatus; intracellular protein transport; GTP binding; endoplasmic reticulum; sarcoplasmic reticulum; small GTPase mediated signal transduction; vesicle-mediated transport                                                                                                                                                                                                                                                                                                                   | Endoplasmicreticulum Golgiapparatus;                                  |          |                            |                            | Known in Uniprot to be phosphorylated |
| 852 LYP2A    | LYP2A_HUMAN  | LYP2A                 | Q95372; Q72472                                         | NP_009191                                 | Acyl-protein thioesterase 2 (EC 3.1.2.-.) (Fucosylthioesterase II) (PLP-1)                                                                                                                                                                                                                                                                                                                                                                                                                                                                                                                                                                                            | GO:0005737; GO:0016787                                                                                                                                                                                                                                    | cytoplasm; fatty acid metabolic process; hydrolyase activity                                                                                                                                                                                                                                                                                                                                                                                                                                                                                                                | Cytoplasm                                                             |          |                            |                            |                                       |
| 853 PCNP     | PCNP_HUMAN   | PCNP                  | Q8WV12; B2RBE7; Q6A444; Q9KCU3; Q9HNS1                 | NP_065090                                 | PEST proteolytic signal-containing nuclear protein (PEST-containing nuclear protein) (PCNP)                                                                                                                                                                                                                                                                                                                                                                                                                                                                                                                                                                           | GO:0007049; GO:0005634; GO:0043161; GO:0005515; GO:0016567                                                                                                                                                                                                | cell cycle; nucleus; proteasomal ubiquitin-dependent protein catabolic process; protein binding; protein ubiquitination                                                                                                                                                                                                                                                                                                                                                                                                                                                     | Nucleus                                                               |          |                            |                            | Known in Uniprot to be phosphorylated |
| 854 IFS2A    | IFS2A_HUMAN  | IFS2A; B2R4V5         | Q95ZV4; B2R4V5                                         | NP_065123                                 | Eukaryotic translation initiation factor 5A-2 (eIF-5A-2) (Eukaryotic initiation factor 5A isoform 2)                                                                                                                                                                                                                                                                                                                                                                                                                                                                                                                                                                  | GO:0008283; GO:0005829; GO:0008612; GO:0010509; GO:0005515; GO:0007283; GO:0003743; GO:0006413                                                                                                                                                            | cell proliferation; cytosol; peptidyl-lysine modification to hypusine; polyamine homeostasis; protein binding; spermatogenesis; translation initiation factor activity; translational initiation                                                                                                                                                                                                                                                                                                                                                                            |                                                                       |          |                            |                            |                                       |



| Protein Name | Uniprot Name | Other Names                 | Uniprot ID                                                                     | Refseq IDs                              | Protein Description                                                                                                                                                                                                                                                                                                                          | GO ID                                                                                                                                                      | GO terms                                                                                                                                                                                                                                                                                                                                                                                                                                                                                                                               | Subcellular location                             | Comments | Comments - Database Search            | Comments - Database Search         | Function                           |
|--------------|--------------|-----------------------------|--------------------------------------------------------------------------------|-----------------------------------------|----------------------------------------------------------------------------------------------------------------------------------------------------------------------------------------------------------------------------------------------------------------------------------------------------------------------------------------------|------------------------------------------------------------------------------------------------------------------------------------------------------------|----------------------------------------------------------------------------------------------------------------------------------------------------------------------------------------------------------------------------------------------------------------------------------------------------------------------------------------------------------------------------------------------------------------------------------------------------------------------------------------------------------------------------------------|--------------------------------------------------|----------|---------------------------------------|------------------------------------|------------------------------------|
| 880          | FBLN1_HUMAN  | FBLN1; FBLN1                | P22087; Q6IAT5; O75259; Q9R9J6; B5BUE8; Q9UHV9; Q5QY35; Q9R9P7; Q9UHV9; B1AQP2 | NP_001427                               | rRNA 2'-O-methyltransferase fibrillin (EC 2.1.1.-) (34 kDa nuclear scleroderma antigen)                                                                                                                                                                                                                                                      | GO:0003723; GO:0001618; GO:0005730; GO:0005115; GO:0006364; GO:0003029                                                                                     | RNA binding; methyltransferase activity; nucleolus; protein binding; rRNA processing; ribonucleoprotein complex                                                                                                                                                                                                                                                                                                                                                                                                                        | Nucleus/nucleolus                                |          |                                       |                                    |                                    |
| 881          | PF2D2_HUMAN  | PF2D2; Q5SY55; B1AQP2       | Q5SY55                                                                         | NP_036526                               | Prefoldin subunit 2                                                                                                                                                                                                                                                                                                                          | GO:0016272; GO:0006457; GO:00051082                                                                                                                        | prefoldin complex; protein folding; unfolded protein binding                                                                                                                                                                                                                                                                                                                                                                                                                                                                           |                                                  |          |                                       |                                    |                                    |
| 882          | PF4_HUMAN    | PF4                         | Q9NQP4; Q5TD11; Q92779                                                         | NP_002614                               | Prefoldin subunit 4 (Protein C-1)                                                                                                                                                                                                                                                                                                            | GO:0051087; GO:0016272; GO:00051082                                                                                                                        | chaperone binding; prefoldin complex; unfolded protein binding                                                                                                                                                                                                                                                                                                                                                                                                                                                                         |                                                  |          | Known in Uniprot to be phosphorylated |                                    |                                    |
| 883          | PER2_HUMAN   | PER2; A212P7                | Q15055; Q42C49; Q9UQ45; A212P7                                                 | NP_073728                               | Period circadian protein homolog 2 (Circadian clock protein PERIOD 2) (PER2); Period 2 (Period homolog 2 (Drosophila), isoform CRA_c)                                                                                                                                                                                                        | GO:0007623; GO:0005737; GO:0005634; GO:0005515; GO:0006355; GO:0004871; GO:0007165; GO:0006355; GO:0006635; GO:0005759; GO:0006355                         | circadian rhythm; cytoplasm; nucleus; protein binding; regulation of transcription, DNA-dependent; signal transducer activity; signal transduction; regulation of transcription, DNA-dependent                                                                                                                                                                                                                                                                                                                                         | Nucleus/Cytoplasm;                               |          | Known in Uniprot to be phosphorylated | Known in HPRD to be phosphorylated |                                    |
| 884          | ECHM1_HUMAN  | ECHM1                       | P30084; O00739; Q5VWY1; Q9R9S4                                                 | NP_004083                               | Enoyl-CoA hydratase, mitochondrial (EC 4.2.1.17) (Short chain enoyl-CoA hydratase) (SCEH) (Enoyl-CoA hydratase 1)                                                                                                                                                                                                                            | GO:0005737; GO:0006635; GO:0005515                                                                                                                         | enoyl-CoA hydratase activity; fatty acid beta-oxidation; mitochondrial matrix; protein binding                                                                                                                                                                                                                                                                                                                                                                                                                                         | Mitochondrion/matrix                             |          |                                       |                                    |                                    |
| 885          | TRAK2_HUMAN  | TRAK2                       | Q62966; Q9VHW7; Q9R9S2; Q9C0K5; Q9C0K6                                         | NP_055864                               | Trafficking kinesin-binding protein 2 (Amyotrophic lateral sclerosis 2 chromosomal region candidate gene 3 protein)                                                                                                                                                                                                                          | GO:005811; GO:0005737; GO:0005886                                                                                                                          | GABA receptor binding; cytoplasm; plasma membrane                                                                                                                                                                                                                                                                                                                                                                                                                                                                                      | Cytoplasm                                        |          |                                       |                                    |                                    |
| 886          | CG024_HUMAN  | CG024; GCCT                 | Q75223; B2RND0; Q98537                                                         | NP_076956                               | Gamma-glutamylcyclotransferase (EC 2.3.2.4) (Cytochrome c-releasing factor 21)                                                                                                                                                                                                                                                               | GO:0008415; GO:0005829; GO:0003939; GO:0042803; GO:0001836                                                                                                 | acyltransferase activity; cytosol; gamma-glutamylcyclotransferase activity; protein homodimerization activity; release of cytochrome c from mitochondria                                                                                                                                                                                                                                                                                                                                                                               |                                                  |          |                                       |                                    |                                    |
| 887          | DYNA_HUMAN   | DYNA; Q6MZ23; DCTN1; Q6IQ37 | Q6MZ23; Q6IQ37                                                                 | NP_004073; NP_075486; NP_0011285 (p135) | Dynactin subunit 1 (150 kDa dynein-associated polypeptide) (DAP-150) (DP-150) (p150-glued)                                                                                                                                                                                                                                                   | GO:0005737; GO:0003286; GO:0005874; GO:0007067; GO:0003774; GO:0007399; GO:0005515; GO:0007218; GO:0001515; GO:0005886; GO:0007268                         | cytoplasm; dynein complex; microtubule; mitosis; motor activity; nervous system development; protein binding; spindle pole                                                                                                                                                                                                                                                                                                                                                                                                             | Cytoplasm/Cytoplasmic toskelton                  |          | Known in Uniprot to be phosphorylated |                                    |                                    |
| 888          | PDYN_HUMAN   | PDYN                        | Q9UJL2; Q61037                                                                 | XP_299313; NP_077722                    | Proenkephalin-B (Beta-neoendorphin-dynorphin) (Preprodynorphin) (Cleaved into: Alpha-neoendorphin; Beta-neoendorphin; Big dynorphin (Big Dyn); Dynorphin A(1-17) (Dynorphin A) (Dyn-A17); Dynorphin A(1-13); Dynorphin A(1-8); Leu-enkephalin; Rmorphin (Dynorphin B) (Dyr-B) (Dynorphin B(1-13)); Leuorphan (Dynorphin B-29))               | GO:0005737; GO:0005886; GO:0007268                                                                                                                         | extracellular region; neuropeptide signaling pathway; opioid peptide activity; plasma membrane; synaptic transmission                                                                                                                                                                                                                                                                                                                                                                                                                  | Secreted                                         |          |                                       |                                    |                                    |
| 889          | CELR2_HUMAN  | CELR2; Q5T277               | Q9CHU4; Q5T277; Q92566                                                         | NP_001399                               | Cadherin ECF LAG seven-pass G-type receptor 2 (Epidermal growth factor-like 2) (Multiple epidermal growth factor-like domains 3) (Flamingo 1)                                                                                                                                                                                                | GO:0004930; GO:0016055; GO:0005509; GO:0005737; GO:0048813; GO:0007156; GO:0016021; GO:0021999; GO:0007218; GO:0005886; GO:0005515; GO:0022407; GO:0008270 | G-protein coupled receptor activity; Wnt receptor signaling pathway; calcium ion binding; cytoplasm; dendrite morphogenesis; homophilic cell adhesion; integral to membrane; neural plate anterior/posterior pattern formation; neuropeptide signaling pathway; plasma membrane; protein binding; regulation of cell-cell adhesion; regulation of gene-specific transcription                                                                                                                                                          | Cell membrane/Multipass transmembrane protein    |          |                                       |                                    |                                    |
| 890          | ZFAN1_HUMAN  | ZFAN1                       | Q8TFC1; Q65887; Q61432; Q6PQ06; Q9R9H10                                        | NP_078975                               | ANI-type zinc finger protein 1                                                                                                                                                                                                                                                                                                               | GO:0000751; GO:0005737; GO:0003684; GO:0044419; GO:0019941; GO:0005654; GO:0007188; GO:0005515; GO:0022407; GO:0008270                                     | zinc ion binding                                                                                                                                                                                                                                                                                                                                                                                                                                                                                                                       |                                                  |          |                                       |                                    |                                    |
| 891          | DDB1_HUMAN   | DDB1                        | Q15513; A6NG77; B2R648; Q15176; Q13289; Q58F96                                 | NP_001914                               | DNA damage-binding protein 1 (Damage-specific DNA-binding protein 1) (UV-damaged DNA-binding factor) (DDB p127 subunit) (DNA damage-binding protein a) (DDBa) (UV-damaged DNA-binding protein 1) (UV-DDB 1) (Xeroderma pigmentosum group F-complementing protein) (XPCE) (XPCE-binding factor) (XPB-88) (HIV X-associated protein 1) (XAP-1) | GO:0000751; GO:0005737; GO:0003684; GO:0044419; GO:0019941; GO:0005654; GO:0007188; GO:0005515; GO:0022407; GO:0008270                                     | cell cycle checkpoint; cytoplasm; damaged DNA binding; interspecies interaction between organisms; modification-dependent protein catabolic process; nucleoplasm; nucleotide-excision repair; DNA damage removal; protein binding                                                                                                                                                                                                                                                                                                      | Cytoplasm/Nucleus                                |          | Known in Uniprot to be phosphorylated |                                    |                                    |
| 892          | ILEU1_HUMAN  | ILEU1                       | P30740; Q5R9F8; Q5W0E1                                                         | NP_109591                               | Leukocyte elastase inhibitor (LEI) (Macrocystine/neutral diastase inhibitor) (M/NEI) (EI) (Serpine B1)                                                                                                                                                                                                                                       | GO:0005737; GO:0004867                                                                                                                                     | cytoplasm; serine-type endopeptidase inhibitor activity                                                                                                                                                                                                                                                                                                                                                                                                                                                                                | Cytoplasm                                        |          | Known in Uniprot to be phosphorylated |                                    |                                    |
| 893          | RAB18_HUMAN  | RAB18; ABK751               | Q9H0U4; ABK751                                                                 | NP_112243                               | Ras-related protein Rab-18                                                                                                                                                                                                                                                                                                                   | GO:0005525; GO:0016020; GO:0005515; GO:0015031; GO:0007264                                                                                                 | GTP binding; Golgi apparatus; membrane; protein binding; protein transport; small GTPase mediated signal transduction                                                                                                                                                                                                                                                                                                                                                                                                                  | Membrane/Lipid/anchored cytoplasmic cytoskeleton |          |                                       |                                    |                                    |
| 894          | HY1_HUMAN    | Q9BZ84; HY1                 | Q9BZ84; Q5T013; Q5Q9A2; Q7Z778; Q95833; Q9BZ83                                 | NP_112484                               | Putative hydroxypyruvate isomerase (EC 5.3.1.22) (Endothelial cell apoptosis protein E-CE1)                                                                                                                                                                                                                                                  | GO:0008903                                                                                                                                                 | hydroxypyruvate isomerase activity                                                                                                                                                                                                                                                                                                                                                                                                                                                                                                     |                                                  |          |                                       |                                    |                                    |
| 895          | C1TC_HUMAN   | C1TC                        | P11586; Q86C03; Q8BPV5                                                         | NP_005947                               | C-1-tetrahydrofolate synthase, cytoplasmic (C1-TF synthase) (Includes: Methylene tetrahydrofolate dehydrogenase (EC 1.5.1.5); Methylene tetrahydrofolate cyclohydrolase (EC 3.5.4.9); Formyltetrahydrofolate synthetase (EC 6.3.4.3))                                                                                                        | GO:0005524; GO:0009396; GO:0004329; GO:0001105; GO:0004477; GO:0009086; GO:0004488; GO:0005739; GO:0006730; GO:0055114; GO:0005515; GO:0006164             | ATP binding; folic acid and derivative biosynthetic process; formate-tetrahydrofolate ligase activity; histidine biosynthetic process; methylene tetrahydrofolate cyclohydrolase activity; methionine biosynthetic process; methylene tetrahydrofolate dehydrogenase (NADP+) activity; mitochondrion; one-carbon compound metabolic process; oxidation reduction; protein binding; purine nucleobase biosynthetic process; cell redox homeostasis; cytoplasm; electron carrier activity; nucleus; protein disulfide isomerase activity | Cytoplasm                                        |          | Known in Uniprot to be phosphorylated |                                    |                                    |
| 896          | SH3L3_HUMAN  | SH3L3; Q5T122               | Q9I299; Q5T122                                                                 | NP_112576                               | SH3 domain-binding glutamic acid-rich-like protein 3 (SH3 domain-binding protein 1) (SH3BP-1)                                                                                                                                                                                                                                                | GO:0005525; GO:0005634; GO:0015035; GO:0009055; GO:0005634; GO:0005525; GO:0001393; GO:0007264                                                             | GTP binding; Golgi membrane; protein transport; small GTPase mediated signal transduction                                                                                                                                                                                                                                                                                                                                                                                                                                              | Cytoplasm/Nucleus                                |          |                                       |                                    |                                    |
| 897          | RB33B_HUMAN  | RB33B                       | Q9H0B2; Q4W580; B2R987                                                         | NP_112586                               | Ras-related protein Rab-33B                                                                                                                                                                                                                                                                                                                  | GO:0005525; GO:0015035; GO:0007264                                                                                                                         | GTP binding; Golgi membrane; protein transport; small GTPase mediated signal transduction                                                                                                                                                                                                                                                                                                                                                                                                                                              | Golgi apparatus/membrane                         |          |                                       |                                    |                                    |
| 898          | UCK1_HUMAN   | UCK1                        | Q9H487; Q5T172; Q61A74                                                         | NP_113620                               | Uridine-cytidine kinase 1 (UCK 1) (EC 2.7.1.48) (Uridine monophosphokinase 1) (Cytidine monophosphokinase 1)                                                                                                                                                                                                                                 | GO:0005525; GO:0005514; GO:0005515; GO:0004849                                                                                                             | ATP binding; cytosol; metabolic process; phosphotransferase activity, alcohol group as acceptor; uridine kinase activity                                                                                                                                                                                                                                                                                                                                                                                                               |                                                  |          |                                       |                                    | Kinase                             |
| 899          | PARP9_HUMAN  | PARP9                       | Q81QX6; Q8TFC3; Q9BZL8; Q9BZL9                                                 | NP_113646; NP_001139                    | Poly (ADP-ribose) polymerase 9 (PARP-9) (EC 2.4.2.30) (B aggressive lymphoma protein)                                                                                                                                                                                                                                                        | GO:0003950; GO:0016477; GO:0005634                                                                                                                         | NAD+ ADP-ribose/tyrosyltransferase activity; cell migration; nucleus                                                                                                                                                                                                                                                                                                                                                                                                                                                                   | Nucleus                                          |          |                                       |                                    |                                    |
| 900          | SH3L2_HUMAN  | SH3L2; Q7Z734               | Q9UJCS; Q5U265; Q9BPV5; Q7Z734; Q2VPC2; Q9R9E8                                 | NP_113657                               | SH3 domain-binding glutamic acid-rich-like protein 2 (Fovea-associated SH3 domain-binding protein); SH3 domain binding glutamic acid-rich protein like 2 (CDNA, FLJ92017, Homo sapiens SH3 domain binding glutamic acid-rich protein like 2) (SH3BGL2), mRNA                                                                                 | GO:0017124; GO:0005634; GO:0005525; GO:0005634; GO:0005525; GO:0005634; GO:0005525; GO:0005634                                                             | SH3 domain binding; nucleus;                                                                                                                                                                                                                                                                                                                                                                                                                                                                                                           | Nucleus;                                         |          |                                       |                                    |                                    |
| 901          | VAMP8_HUMAN  | VAMP8                       | Q9H487; Q5Q5P9; Q66255; Q61809                                                 | NP_003752                               | Vesicle-associated membrane protein 8 (VAMP-8) (Endobrevin) (EDB)                                                                                                                                                                                                                                                                            | GO:0005769; GO:0016021; GO:0005624; GO:0016192                                                                                                             | early endosome; integral to membrane; membrane fraction; vesicle-mediated transport                                                                                                                                                                                                                                                                                                                                                                                                                                                    | Membrane/Singlpassy peVmembrane protein          |          | Known in Uniprot to be phosphorylated |                                    |                                    |
| 902          | Q6IPF4_HUMAN | Q6IPF4; Q68Y55              | Q6IPF4; Q68Y55                                                                 | NP_005007; NP_001092                    | Poly(RC) binding protein 2 (Poly(RC) binding protein 2, isoform CRA_d)                                                                                                                                                                                                                                                                       | GO:0003723                                                                                                                                                 | RNA binding                                                                                                                                                                                                                                                                                                                                                                                                                                                                                                                            |                                                  |          |                                       |                                    | known in HPRD to be phosphorylated |
| 903          | FAG2A_HUMAN  | FAG2A; ADFGR7; E5Y11        | Q9BSJ8; ADFGR7; ABK252; Q94848; Q6R9A4; Q9H611; Q9H6W2; Q9H416                 | NP_056107                               | Extended synaptotagmin-1 (E-Syt1) (Membrane-bound C2 domain-containing protein) (Protein FAM62A)                                                                                                                                                                                                                                             | GO:0016021                                                                                                                                                 | integral to membrane                                                                                                                                                                                                                                                                                                                                                                                                                                                                                                                   | Membrane/Multipass transmembrane protein         |          | Known in Uniprot to be phosphorylated |                                    |                                    |
| 904          | HDHD2_HUMAN  | HDHD2; HDHD2; ABK773        | Q9H0R4; Q9H0R4; Q9ANW4; ABK773                                                 | NP_115500                               | Halocacid dehalogenase-like hydrolase domain-containing protein 2                                                                                                                                                                                                                                                                            | GO:0016787; GO:0008152                                                                                                                                     | hydrolase activity; metabolic process                                                                                                                                                                                                                                                                                                                                                                                                                                                                                                  |                                                  |          |                                       |                                    |                                    |
| 905          | TCHP_HUMAN   | TCHP                        | Q9B792; Q9B792; Q9NAG0                                                         | NP_115676; NP_001137                    | Trichoplein keratin filament-binding protein 2 (CDNA, FLJ92017, Homo sapiens SH3 domain binding glutamic acid-rich protein like 2)                                                                                                                                                                                                           | GO:0045179; GO:0045095; GO:0005515                                                                                                                         | apical cortex; keratin filament; protein binding                                                                                                                                                                                                                                                                                                                                                                                                                                                                                       | Cytoplasm/cytoskeleton                           |          |                                       |                                    |                                    |
| 906          | SLD5_HUMAN   | SLD5                        | Q9R8T9; SLD5; B2R8H5                                                           | NP_115712                               | DNA replication complex GINS protein SLD5 (GINS complex subunit 4)                                                                                                                                                                                                                                                                           | GO:0006260; GO:0005737; GO:0005634                                                                                                                         | DNA replication; cytoplasm; nucleus                                                                                                                                                                                                                                                                                                                                                                                                                                                                                                    | Cytoplasm/Nucleus                                |          |                                       |                                    |                                    |
| 907          | VPS25_HUMAN  | VPS25; B2R581               | Q9R8T9; B2R581                                                                 | NP_115729                               | Vacuolar protein-sorting-associated protein 25 (Vps25) (ESCRT-II complex subunit VPS25) (ELL-associated protein of 20 kDa) (Dermal papilla-derived protein 9)                                                                                                                                                                                | GO:0005737; GO:0005634; GO:0015031; GO:0006355                                                                                                             | cytoplasm; nucleus; protein transport; regulation of transcription, DNA-dependent                                                                                                                                                                                                                                                                                                                                                                                                                                                      | Cytoplasm/Nucleus/eoplasm                        |          |                                       |                                    |                                    |
| 908          | CPNS2_HUMAN  | CPNS2                       | Q9L466; Q9BPV4                                                                 | NP_115706                               | Calpain small subunit 2 (CSS2) (Calcium-dependent protease small subunit 2)                                                                                                                                                                                                                                                                  | GO:0005509; GO:0005737; GO:0005886                                                                                                                         | calcium ion binding; cytoplasm; plasma membrane                                                                                                                                                                                                                                                                                                                                                                                                                                                                                        | Cytoplasm/Cell membrane                          |          |                                       |                                    |                                    |
| 909          | HINT2_HUMAN  | HINT2; Q5TCW3               | Q9B688; Q5TCW3                                                                 | NP_115982                               | Histidine triad nucleotide-binding protein 2 (HINT-2) (EC 3.-.-) (HINT-3) (HT1-TN3a) (PKC1-related HIT protein); Histidine triad nucleotide binding protein 2 (Histidine triad nucleotide binding protein 2, isoform CRA_b)                                                                                                                  | GO:0005737; GO:0005576; GO:0016787; GO:0005739; GO:0003824                                                                                                 | extracellular region; hydrolase activity; mitochondrion; catalytic activity                                                                                                                                                                                                                                                                                                                                                                                                                                                            | Secreted;                                        |          |                                       |                                    |                                    |





| Protein Name | Uniprot Name | Other Names                  | Uniprot ID                                                             | Refseq IDs                                                                                                                                                                                                                                      | Protein Description                                                                                                                                                                                                                                                                                                                            | GO ID                                                                                                                                                                                                                                                                                                                                    | GO terms                                                                                                                                                                                                                                                                                                                                                                                                                     | Subcellular location                                                                                                                                                                                                                                                                                            | Comments                              | Comments - Database Search            | Comments - Database Search         | Function    |
|--------------|--------------|------------------------------|------------------------------------------------------------------------|-------------------------------------------------------------------------------------------------------------------------------------------------------------------------------------------------------------------------------------------------|------------------------------------------------------------------------------------------------------------------------------------------------------------------------------------------------------------------------------------------------------------------------------------------------------------------------------------------------|------------------------------------------------------------------------------------------------------------------------------------------------------------------------------------------------------------------------------------------------------------------------------------------------------------------------------------------|------------------------------------------------------------------------------------------------------------------------------------------------------------------------------------------------------------------------------------------------------------------------------------------------------------------------------------------------------------------------------------------------------------------------------|-----------------------------------------------------------------------------------------------------------------------------------------------------------------------------------------------------------------------------------------------------------------------------------------------------------------|---------------------------------------|---------------------------------------|------------------------------------|-------------|
| 956 PTPR3    | PTPR3_HUMAN  | PTPR3; Q5KRP3                | Q12913; Q12525; Q8HHM2; Q9HNP3                                         | NP_002834                                                                                                                                                                                                                                       | Receptor-type tyrosine-protein phosphatase eta (Protein-tyrosine phosphatase eta) (R-PTP-eta) (EC 3.1.3.48) (HPTT eta) (Protein-tyrosine phosphatase receptor type 3) (Density-enhanced phosphatase 1) (DEP-1) (CD antigen CD148)                                                                                                              | GO:003054; GO:0007267; GO:0005887; GO:0005634; GO:0006470; GO:0007169; GO:0005001                                                                                                                                                                                                                                                        | cell junction; cell-cell signaling; integral to plasma membrane; nucleus; protein amino acid dephosphorylation; transmembrane receptor protein tyrosine kinase signaling pathway; transmembrane receptor protein tyrosine phosphatase activity                                                                                                                                                                               | MembraneSinglepassy<br>pelmembraneprotein                                                                                                                                                                                                                                                                       |                                       |                                       |                                    | Phosphatase |
| 957 DPM3     | DPM3_HUMAN   | DPM3; Q5S862                 | Q55862; Q9P2X0; Q5S863; Q98KN4; Q98KN5                                 | NP_061846; NP_714963                                                                                                                                                                                                                            | Dolichol-phosphate mannosyltransferase subunit 3 (Dolichol-phosphate mannosyltransferase subunit 3) (DPM synthase complex subunit 3) (Mannose-6-phosphate synthase subunit 3) (M6P synthase subunit 3) (Prostin-1); Dolichyl-phosphate mannosyltransferase polypeptide 3 (Dolichyl-phosphate mannosyltransferase polypeptide 3, isoform CRA_b) | GO:0006506; GO:0003385; GO:0030176; GO:0018406; GO:0005359; GO:0005515; GO:0016757                                                                                                                                                                                                                                                       | GPI anchor biosynthetic process; dolichol-phosphate-mannose synthase complex; integral to endoplasmic reticulum membrane; protein amino acid C-linked glycosylation via 2'-alpha-mannosyl-L-tryptophan; protein amino acid O-linked mannosylation; protein binding; transference activity; transferring glycosyl groups                                                                                                      | Endoplasmicreticulum<br>membraneMultiplasme<br>mbraneprotein                                                                                                                                                                                                                                                    |                                       |                                       |                                    |             |
| 958 DMXL2    | DMXL2_HUMAN  | DMXL2                        | Q8TD06; Q94938                                                         | NP_056078                                                                                                                                                                                                                                       | DmX-like protein 2 (Rabconnectin-3)                                                                                                                                                                                                                                                                                                            | GO:0017137; GO:0030054; GO:0008021                                                                                                                                                                                                                                                                                                       | Rab GTPase binding; cell junction; synaptic vesicle                                                                                                                                                                                                                                                                                                                                                                          | Cytoplasmicvesicleseser<br>etoryvesiclesynapticve<br>siclemembranePeripher<br>almembraneprotein                                                                                                                                                                                                                 | Known in Uniprot to be phosphorylated |                                       | Known in HPRD to be phosphorylated |             |
| 959 CYTN     | CYTN_HUMAN   | CYTN                         | P01037; Q96LE6; Q9UC06                                                 | NP_001889                                                                                                                                                                                                                                       | Cystatin-SN (Cystatin-1) (Salivary cystatin-SA-1) (Cystatin-SA-1)                                                                                                                                                                                                                                                                              | GO:0004869; GO:0005576                                                                                                                                                                                                                                                                                                                   | cysteine-type endopeptidase inhibitor activity; extracellular region                                                                                                                                                                                                                                                                                                                                                         |                                                                                                                                                                                                                                                                                                                 |                                       |                                       |                                    |             |
| 960 AP2A1    | AP2A1_HUMAN  | AP2A1                        | Q96C72; Q96PP6; Q96PP7; Q9H070                                         | NP_055018                                                                                                                                                                                                                                       | AP-2 complex subunit alpha-1 (Adaptor-related protein complex 2 alpha-1 subunit) (Adaptor protein complex AP-2 subunit alpha-1) (Alpha-adaptin) (Plasma membrane adaptor 142/142) (Adaptin alpha A subunit) (Alpha-adaptin A) (Clathrin assembly protein complex 2 alpha-A large chain) (100 kDa coated vesicle protein A)                     | GO:0030122; GO:0006895; GO:0030130; GO:0005829; GO:0006897; GO:0005886; GO:0005515; GO:0008565; GO:0005524; GO:0015986; GO:0006933; GO:0008887; GO:0004961; GO:0033180; GO:0006885; GO:0007605; GO:0016471                                                                                                                               | AP-2 adaptor complex; Golgi to endosome transport; clathrin coat of trans-Golgi network vesicle; cytosol; endocytosis; intracellular protein transport; protein binding; protein transporter activity; regulation of defense response to virus by virus                                                                                                                                                                      | GolgiapparatusCytopla<br>smicvesicleclathrincoat<br>edvesiclemembraneprotein                                                                                                                                                                                                                                    | Known in Uniprot to be phosphorylated |                                       |                                    |             |
| 961 VATA1    | VATA1_HUMAN  | VATA1; Q5YD9Y; VATA1; B2RBR8 | P38606; Q5YD9Y; Q96DYG; Q9H1Y3; B2RBR8                                 | NP_001681                                                                                                                                                                                                                                       | V-type proton ATPase catalytic subunit A (V-ATPase subunit A) (EC 3.6.3.14) (Vacuolar proton pump subunit alpha) (V-ATPase 69 kDa subunit) (Vacuolar ATPase isoform V468)                                                                                                                                                                      | GO:0005524; GO:0015986; GO:0006933; GO:0008887; GO:0004961; GO:0033180; GO:0006885; GO:0007605; GO:0016471                                                                                                                                                                                                                               | ATP binding; ATP synthesis coupled proton transport; hydrogen ion transporting ATP synthase activity; rotational mechanism; integral to plasma membrane; proton-transporting ATPase activity; rotational mechanism; proton-transporting V-type ATPase, V1 domain                                                                                                                                                             | ATP synthesis coupled proton transport; endomembrane system; excretion; hydrogen ion transporting ATP synthase activity; rotational mechanism; protein binding; proton-transporting V-type ATPase, V1 domain; regulation of pH; sensory perception of sound; vacuolar proton-transporting V-type ATPase complex |                                       | Known in Uniprot to be phosphorylated |                                    |             |
| 962 VATB1    | VATB1_HUMAN  | Q6PH46; VATB1                | Q6PH46; P15133; Q53P70                                                 | NP_001683                                                                                                                                                                                                                                       | V-type proton ATPase subunit B, kidney isoform (V-ATPase subunit B 1) (Vacuolar proton pump subunit B 1) (Endomembrane proton pump 58 kDa subunit)                                                                                                                                                                                             | GO:0015986; GO:0012505; GO:0007588; GO:0046933; GO:0006933; GO:0049651; GO:0033180; GO:0006885; GO:0007605; GO:0016471                                                                                                                                                                                                                   | ATP synthesis coupled proton transport; endomembrane system; excretion; hydrogen ion transporting ATP synthase activity; rotational mechanism; protein binding; proton-transporting V-type ATPase, V1 domain; regulation of pH; sensory perception of sound; vacuolar proton-transporting V-type ATPase complex                                                                                                              | Intracytoplasmicmembr<br>anePeriplasmicmembr<br>aneprotein                                                                                                                                                                                                                                                      |                                       |                                       |                                    |             |
| 963 IHB1     | IHB1_HUMAN   | IHB1; Q53XN2                 | Q14974; Q53XN2; Q14637; Q96327                                         | NP_002256                                                                                                                                                                                                                                       | Importin subunit beta-1 (Karyopherin subunit beta-1) (Nuclear Factor P97) (Importin-90); Karyopherin (Importin) beta 1 (Karyopherin (Importin) beta 1, isoform CRA_a)                                                                                                                                                                          | GO:0006607; GO:0005829; GO:0044419; GO:0008139; GO:0005643; GO:0006654; GO:0019904; GO:0000059; GO:0000060; GO:0008565; GO:0008270; GO:0005737; GO:0005515; GO:0006610; GO:0005739; GO:0016404; GO:0005777; GO:0033814; GO:0005515; GO:0006694; GO:0005498; GO:0008152; GO:0016740; GO:0007031                                           | importin-mediated nuclear import into nucleus; cytosol; interspecies interaction between organisms; nuclear localization sequence binding; nuclear pore; nucleoplasm; protein domain specific binding; protein import into nucleus; docking; protein import into nucleus; translocation; protein transporter activity; zinc ion binding; cytoplasm; protein binding; ribosome protein import into nucleus                    | CytoplasmNucleuseerve<br>lope;                                                                                                                                                                                                                                                                                  | Known in Uniprot to be phosphorylated |                                       |                                    |             |
| 964 NLTP     | NLTP_HUMAN   | NLTP; Q5V271; Q6NFX4         | P22307; Q5V271; Q15432; Q15432; Q99A30; Q6NFX4                         | NP_002970; NP_001007                                                                                                                                                                                                                            | Non-specific lipid-transfer protein (EC 2.3.1.176) (Propanoyl-CoA C-acyltransferase) (NSL-TP) (Sterol carrier protein 2) (SCP-2) (Sterol carrier protein X) (SCP-X) (SCP-Xb) (SCP-X); Sterol carrier protein 2 (Sterol carrier protein 2, isoform CRA_a); Sterol carrier protein 2                                                             | GO:0005524; GO:0005739; GO:0016404; GO:0005777; GO:0033814; GO:0005515; GO:0006694; GO:0005498; GO:0008152; GO:0016740; GO:0007031                                                                                                                                                                                                       | lipid transport; mitochondrion; oxidoreductase activity; peroxisome; propanoyl-CoA C-acyltransferase activity; protein binding; sterol biosynthetic process; sterol carrier activity; metabolic process; transferase activity; peroxisome organization                                                                                                                                                                       | CytoplasmMitochondrio<br>nPeroxisome;                                                                                                                                                                                                                                                                           | Known in Uniprot to be phosphorylated |                                       |                                    |             |
| 965 RAB5A    | RAB5A_HUMAN  | RAB5A; Q6T614                | P20339; Q6T614                                                         | NP_004153                                                                                                                                                                                                                                       | Ras-related protein Rab-5A; Cervical cancer oncogene 10 protein (RAB5A protein) (RAB5A, member RAS oncogene family, isoform CRA_a) (cDNA, FLJ93000, Homo sapiens RAB5A, member RAS oncogene family (RAB5A), mRNA)                                                                                                                              | GO:0005525; GO:0003924; GO:0015031; GO:0007264; GO:0005759; GO:0030139; GO:0045121; GO:0005525; GO:0003924; GO:0030425; GO:0042470; GO:0016020; GO:0015031; GO:0007264                                                                                                                                                                   | GTP binding; GTPase activity; early endosome membrane; endocytosis; melanosome; plasma membrane; protein binding; protein transport; small GTPase mediated signal transduction; early endosome; endocytic vesicle; membrane raft; ruffle                                                                                                                                                                                     | CellmembraneLipidanc<br>horCytoplasmicacidEa<br>rft                                                                                                                                                                                                                                                             | Known in Uniprot to be phosphorylated |                                       |                                    |             |
| 966 RB27A    | RB27A_HUMAN  | RB27A; A2RU94                | Q6F140; P51193; Q00195; Q9UIR9; Q9I9U5; A2RU94                         | NP_004571; NP_899057; NP_899058; NP_899059                                                                                                                                                                                                      | Ras-related protein Rab-27A (Rab-27) (GTP-binding protein Ran) (RAB27A, member RAS oncogene family (RAB27A, member RAS oncogene family, isoform CRA_a) (cDNA, FLJ93274, Homo sapiens RAB27A, member RAS oncogene family (RAB27A), mRNA)                                                                                                        | GO:0005525; GO:0003924; GO:0030425; GO:0042470; GO:0016020; GO:0015031; GO:0007264                                                                                                                                                                                                                                                       | GTP binding; GTPase activity; dendrite; melanosome; membrane; protein transport; small GTPase mediated signal transduction                                                                                                                                                                                                                                                                                                   | MembraneLipidanchor<br>Melanosome;                                                                                                                                                                                                                                                                              |                                       |                                       |                                    |             |
| 967 KAD3     | KAD3_HUMAN   | KAD3                         | Q9UIJ7; Q9UY66; Q9H576; Q9NRP4                                         | NP_057366                                                                                                                                                                                                                                       | GTP-AMP phosphotransferase mitochondrial (EC 2.7.4.10) (Adenylylate kinase 3) (AK 3) (Adenylylate kinase 3 alpha-like 1)                                                                                                                                                                                                                       | GO:0005524; GO:0005525; GO:0004017; GO:0005759; GO:0006139; GO:0004699                                                                                                                                                                                                                                                                   | ATP binding; GTP binding; adenylylate kinase activity; mitochondrial matrix; nucleobase, nucleoside, nucleotide and nucleic acid metabolic process; nucleotide triphosphate adenylylate kinase activity                                                                                                                                                                                                                      | Mitochondrionmatrix                                                                                                                                                                                                                                                                                             |                                       |                                       | Kinase                             |             |
| 968 RAB14    | RAB14_HUMAN  | RAB14; B3KR31                | P61106; P32887; Q5VDV4; Q6Q7K5; Q96940; Q9UI11; B3KR31                 | NP_057406                                                                                                                                                                                                                                       | Ras-related protein Rab-14                                                                                                                                                                                                                                                                                                                     | GO:0005525; GO:0003924; GO:0005759; GO:0006695; GO:0008529; GO:0005759; GO:0005770; GO:0005764; GO:0005624; GO:0005624; GO:0007269; GO:0042175; GO:0048471; GO:0005886; GO:0005515; GO:0015031; GO:0005794; GO:0007264; GO:0030140                                                                                                       | GTP binding; GTPase activity; Golgi stack; Golgi to endosome transport; cytosol; early endosome; late endosome; lysosome; membrane fraction; neurotransmitter secretion; nuclear envelope-endoplasmic reticulum network; perinuclear region of cytoplasm; plasma membrane; protein binding; protein transport; rough endoplasmic reticulum; small GTPase mediated signal transduction; trans-Golgi network transport vesicle | CellmembraneLipidanc<br>horCytoplasmicacid                                                                                                                                                                                                                                                                      | Known in Uniprot to be phosphorylated |                                       |                                    |             |
| 969 EMSY     | EMSY_HUMAN   | EMSY                         | Q7Z589; Q4E109; Q8NBU6; Q8TE50; Q9H819; Q9NRH0; Q7LDY7; P36957; Q9BQ32 | NP_064578                                                                                                                                                                                                                                       | Protein EMSY                                                                                                                                                                                                                                                                                                                                   | GO:0006281; GO:0016568; GO:0005634; GO:0006355                                                                                                                                                                                                                                                                                           | DNA repair; chromatin modification; nucleus; regulation of transcription; DNA-dependent                                                                                                                                                                                                                                                                                                                                      | Nucleus                                                                                                                                                                                                                                                                                                         | Known in Uniprot to be phosphorylated |                                       | Known in HPRD to be phosphorylated |             |
| 970 ODO2     | ODO2_HUMAN   | ODO2; Q7LDY7                 | NP_001924                                                              | Dihydrodipolyllysine-residue succinyltransferase component of 2-oxoglutarate dehydrogenase complex, mitochondrial (EC 2.3.1.61) (Dihydrodipolyllysine-residue succinyltransferase component of 2-oxoglutarate dehydrogenase complex) (EZ) (EZK) | GO:0004149; GO:0031405; GO:0005759; GO:0005634; GO:0045252; GO:0005515; GO:0006099                                                                                                                                                                                                                                                             | dihydrodipolyllysine-residue succinyltransferase activity; lipoleic acid binding; mitochondrial matrix; nucleus; oxoglutarate dehydrogenase complex; protein binding; tricarboxylic acid cycle                                                                                                                                           | Mitochondrion                                                                                                                                                                                                                                                                                                                                                                                                                |                                                                                                                                                                                                                                                                                                                 |                                       |                                       |                                    |             |
| 971 RAB38    | RAB38_HUMAN  | RAB38                        | P20337; Q5VUL2; Q9BS11                                                 | NP_002858                                                                                                                                                                                                                                       | Ras-related protein Rab-38                                                                                                                                                                                                                                                                                                                     | GO:0005525; GO:0003924; GO:0005886; GO:0015031; GO:0007264                                                                                                                                                                                                                                                                               | GTP binding; GTPase activity; plasma membrane; protein transport; small GTPase mediated signal transduction                                                                                                                                                                                                                                                                                                                  | CellmembraneLipidanc<br>horCytoplasmicacid                                                                                                                                                                                                                                                                      | Known in Uniprot to be phosphorylated |                                       |                                    |             |
| 972 IQCD     | IQCD_HUMAN   | IQCD                         | Q96D02; Q62S00; Q96D09                                                 | NP_612460                                                                                                                                                                                                                                       | IQ domain-containing protein D                                                                                                                                                                                                                                                                                                                 | GO:0006935; GO:0005125; GO:0005615; GO:0005793; GO:0004544; GO:0009986; GO:0005783; GO:0005788; GO:0005576; GO:0042470; GO:0018401; GO:0005886; GO:0004656; GO:0005515; GO:0005524; GO:0005737; GO:0006468; GO:0004674; GO:0005488; GO:0005789; GO:0006621; GO:0035114; GO:0009475; GO:0042572                                           | chemotaxis; cytokine activity; extracellular space; integral to membrane                                                                                                                                                                                                                                                                                                                                                     | MembraneMultiplasme<br>mbraneprotein                                                                                                                                                                                                                                                                            |                                       |                                       |                                    |             |
| 973 CKLF5    | CKLF5_HUMAN  | CKLF5                        | NP_001032                                                              | 365 containing protein 5 (Chemokine-like factor superfamily member 5)                                                                                                                                                                           | GO:0006935; GO:0005125; GO:0005615; GO:0005793; GO:0004544; GO:0009986; GO:0005783; GO:0005788; GO:0005576; GO:0042470; GO:0018401; GO:0005886; GO:0004656; GO:0005515; GO:0005524; GO:0005737; GO:0006468; GO:0004674; GO:0005488; GO:0005789; GO:0006621; GO:0035114; GO:0009475; GO:0042572                                                 | ER-Golgi intermediate compartment; cell redox homeostasis; cell surface; endoplasmic reticulum; endoplasmic reticulum lumen; extracellular region; melanosome; peptidyl-proline hydroxylation to 4-hydroxy-L-proline; plasma membrane; procollagen-proline 4-dioxygenase activity; protein binding; protein disulfide isomerase activity | Endoplasmicreticulum<br>umenMelanosomeCell<br>membranePeriplasm<br>embraneprotein                                                                                                                                                                                                                                                                                                                                            |                                                                                                                                                                                                                                                                                                                 |                                       |                                       |                                    |             |
| 974 PDIA1    | PDIA1_HUMAN  | PDIA1; B2RQD2                | P07237; P30037; P32079; Q15205; Q6LDE5; B2RQD2                         | NP_000909                                                                                                                                                                                                                                       | Protein disulfide-isomerase (PDI) (EC 5.3.4.1) (Prolyl 4-hydroxylase subunit beta) (Cellular thyroid hormone-binding protein) (p55)                                                                                                                                                                                                            | GO:0005525; GO:0005515; GO:0005524; GO:0005737; GO:0006468; GO:0004674; GO:0005488; GO:0005789; GO:0006621; GO:0035114; GO:0009475; GO:0042572                                                                                                                                                                                           | ER-Golgi intermediate compartment; cell redox homeostasis; cell surface; endoplasmic reticulum; endoplasmic reticulum lumen; extracellular region; melanosome; peptidyl-proline hydroxylation to 4-hydroxy-L-proline; plasma membrane; procollagen-proline 4-dioxygenase activity; protein binding; protein disulfide isomerase activity                                                                                     | Endoplasmicreticulum<br>umenMelanosomeCell<br>membranePeriplasm<br>embraneprotein                                                                                                                                                                                                                               |                                       |                                       |                                    |             |
| 975 STK24    | STK24_HUMAN  | STK24; Q5T5B3; Q5V92         | Q9Y6E0; Q5T5B3; Q14840; Q5V92                                          | NP_003567                                                                                                                                                                                                                                       | Serine/threonine-protein kinase 24 (EC 2.7.1.1) (STE20-like kinase MST3) (MST-3) (Mammalian STE20-like protein kinase 3)                                                                                                                                                                                                                       | GO:0005515; GO:0005524; GO:0005737; GO:0006468; GO:0004674; GO:0005488; GO:0005789; GO:0006621; GO:0035114; GO:0009475; GO:0042572                                                                                                                                                                                                       | ATP binding; cytoplasm; protein amino acid phosphorylation; protein serine/threonine kinase activity; signal transduction                                                                                                                                                                                                                                                                                                    | Cytoplasm                                                                                                                                                                                                                                                                                                       | Known in Uniprot to be phosphorylated |                                       | Known in HPRD to be phosphorylated | Kinase      |
| 976 RDH11    | RDH11_HUMAN  | RDH11; B2R264                | Q8TC12; A8K2K0; Q6JAH5; Q9NRW0; Q9T931; B2R264                         | NP_057110                                                                                                                                                                                                                                       | Retinol dehydrogenase 11 (EC 1.1.1.-) (Retinol reductase 1) (RdR1) (Prostate short-chain dehydrogenase/reductase 1) (Androgen-regulated short-chain dehydrogenase/reductase 1) (HCV core-binding protein HCBP12)                                                                                                                               | GO:0005525; GO:0005515; GO:0005524; GO:0005737; GO:0006468; GO:0004674; GO:0005488; GO:0005789; GO:0006621; GO:0035114; GO:0009475; GO:0042572                                                                                                                                                                                           | binding; endoplasmic reticulum membrane; integral to membrane; retinol reduction; retinol dehydrogenase activity; retinol metabolic process                                                                                                                                                                                                                                                                                  | Endoplasmicreticulum<br>membraneSinglepassy<br>pelmembraneprotein                                                                                                                                                                                                                                               | Known in Uniprot to be phosphorylated |                                       |                                    |             |
| 977 ECHA     | ECHA_HUMAN   | ECHA; B2R7L4                 | P40939; Q14679; Q96G77; B2R7L4                                         | NP_000173                                                                                                                                                                                                                                       | Trifunctional enzyme subunit alpha, mitochondrial (TP-alpha) (78 kDa gastrin-binding protein) [Includes: Long-chain enoyl-CoA hydratase (EC 4.2.1.17); Long chain 3-hydroxyacyl-CoA dehydrogenase (EC 1.1.1.211)]                                                                                                                              | GO:0003857; GO:0003924; GO:0006630; GO:0016507; GO:0016509; GO:0042645; GO:0055114                                                                                                                                                                                                                                                       | 3-hydroxyacyl-CoA dehydrogenase activity; acyl-CoA C-acyltransferase activity; enoyl-CoA hydratase activity; fatty acid beta-oxidation; fatty acid beta-oxidation multienzyme complex; long-chain-3-hydroxyacyl-CoA dehydrogenase activity; mitochondrial nucleoid; oxidation reduction                                                                                                                                      | Mitochondrion                                                                                                                                                                                                                                                                                                   | Known in Uniprot to be phosphorylated |                                       |                                    |             |

| Protein Name | Uniprot Name | Other Names   | Uniprot ID                                                             | Refseq IDs                      | Protein Description                                                                                                                                                                                                                                                                                                                                     | GO ID                                                                                                                                                                                                                                                                  | GO terms                                                                                                                                                                                                                                                                                                                                                                                                                                                                                                                                                                                                                                                                                            | Subcellular location | Comments                          | Comments - Database Search            | Comments - Uniprot                    | Function                           |        |
|--------------|--------------|---------------|------------------------------------------------------------------------|---------------------------------|---------------------------------------------------------------------------------------------------------------------------------------------------------------------------------------------------------------------------------------------------------------------------------------------------------------------------------------------------------|------------------------------------------------------------------------------------------------------------------------------------------------------------------------------------------------------------------------------------------------------------------------|-----------------------------------------------------------------------------------------------------------------------------------------------------------------------------------------------------------------------------------------------------------------------------------------------------------------------------------------------------------------------------------------------------------------------------------------------------------------------------------------------------------------------------------------------------------------------------------------------------------------------------------------------------------------------------------------------------|----------------------|-----------------------------------|---------------------------------------|---------------------------------------|------------------------------------|--------|
| 978 PUR9     | PUR9_HUMAN   | PUR9; Q53528  | P11939; Q53528; Q13856                                                 | NP_004035                       | Bifunctional purine biosynthesis protein PURH [Includes: Phosphoribosylaminoimidazolecarboxamide formyltransferase (EC 2.1.2.3) (5-aminoimidazole-4-carboxamide ribonucleotide formyltransferase) (AICAR transformylase); IMP cyclohydrolase (EC 3.5.4.10) (inosinase) (IMP synthetase) (ATIC)]                                                         | GO:0006188; GO:0003937; GO:0004643; GO:0005515                                                                                                                                                                                                                         | IMP biosynthetic process; IMP cyclohydrolase activity; phosphoribosylaminoimidazolecarboxamide formyltransferase activity; protein binding                                                                                                                                                                                                                                                                                                                                                                                                                                                                                                                                                          |                      |                                   |                                       | Known in Uniprot to be phosphorylated |                                    |        |
| 979 04ZG20   | 04ZG20_HUMAN | 04ZG20        | Q8TCL5; B3DLF5; Q5VTR3; Q8TF29; Q8VX16                                 | NP_596870                       | Putative uncharacterized protein TTN                                                                                                                                                                                                                                                                                                                    | GO:0004972; GO:0017146; GO:0005509; GO:0006816; GO:0030054; GO:0043025; GO:0005234; GO:0016594; GO:0042802; GO:0000397; GO:0043005; GO:0045211; GO:0051721; GO:0045471                                                                                                 | N-methyl-D-aspartate selective glutamate receptor activity; N-methyl-D-aspartate selective glutamate receptor complex; calcium ion binding; calcium ion transport; cell junction; cell soma; extracellular-glutamate-gated ion channel activity; glycine binding; identical protein binding; magnesium ion binding; neuron projection; postsynaptic membrane; protein phosphatase 2A binding; response to ethanol                                                                                                                                                                                                                                                                                   | Cell membrane        |                                   |                                       |                                       |                                    |        |
| 980 NMD3A    | NMD3A_HUMAN  | NMD3A         | Q9UB84; Q95675; Q6TGL8; Q8WY17; Q9UB89; Q9UMC0; Q9V6H9; E3KQ90         | NP_004800                       | Stomatin-like protein 1 (SLP-1) (Stomatin-related protein) (STORP) (EPB2-like 1) (UNC24 homolog)                                                                                                                                                                                                                                                        | GO:0016021; GO:0005498                                                                                                                                                                                                                                                 | integral to membrane; sterol carrier activity                                                                                                                                                                                                                                                                                                                                                                                                                                                                                                                                                                                                                                                       | Membrane             | Single pass transmembrane protein |                                       |                                       |                                    |        |
| 982 DAK      | DAK_HUMAN    | DAK; DHAK     | Q3LXA3; Q53E99; Q9BVA7; Q9H895                                         | NP_056348                       | Bifunctional ATP-dependent dihydroxyacetone kinase/FAD-AMP lyase (cyclizing) [Includes: ATP-dependent dihydroxyacetone kinase (DHA kinase) (EC 2.7.1.29) (Glycerone kinase); FAD-AMP lyase (cyclizing) (EC 4.6.1.15) (FAD-AMP lyase (cyclic PNH formyl)) (PNH cyclase)]                                                                                 | GO:0005524; GO:0006071; GO:0004371; GO:0016829                                                                                                                                                                                                                         | ATP binding; glycerol metabolic process; glycerone kinase activity; lyase activity                                                                                                                                                                                                                                                                                                                                                                                                                                                                                                                                                                                                                  |                      |                                   |                                       |                                       | Kinase                             |        |
| 983 MIRO2    | MIRO2_HUMAN  | MIRO2; A2IDC2 | Q8IX11; Q8NF53; Q9K131; Q96S17; Q9HT60; Q9H788; A2IDC2                 | NP_620124                       | Mitochondrial Rho GTPase 2 (Hiro-2) (MIRO-2) (EC 3.6.5.-) (Ras homolog gene family member T2) (Ras homolog gene family, member T2 (Ras homolog gene family, member T2, isoform CRA_a))                                                                                                                                                                  | GO:0005525; GO:0006915; GO:0003924; GO:0019725; GO:0018787; GO:0031307; GO:0047497; GO:0005515; GO:0007264; GO:0005522                                                                                                                                                 | GTP binding; apoptosis; calcium ion binding; cellular homeostasis; hydrolase activity; integral to mitochondrial outer membrane; mitochondrion transport along microtubule; protein binding; small GTPase mediated signal transduction; intracellular                                                                                                                                                                                                                                                                                                                                                                                                                                               | Mitochondrion        | outer membrane                    |                                       |                                       |                                    |        |
| 984 ARLBA    | ARLBA_HUMAN  | ARLBA; B3KXD0 | Q958M9; B3KXD0                                                         | NP_620150                       | ADP-ribosylation factor-like protein 8A (ADP-ribosylation factor-like protein 108) (Novel small G protein indispensable for equal chromosome segregation 2)                                                                                                                                                                                             | GO:0005525; GO:0003924; GO:0043014; GO:0048487; GO:0003924; GO:0031902; GO:0005576; GO:0030496; GO:0007264; GO:0005523                                                                                                                                                 | GTP binding; GTPase activity; alpha-tubulin binding; beta-tubulin binding; chromosome segregation; late endosome membrane; lysosomal membrane; midbody; small GTPase mediated signal transduction; spindle midzone                                                                                                                                                                                                                                                                                                                                                                                                                                                                                  | Late endosome        | membrane                          |                                       |                                       |                                    |        |
| 985 TRI43    | TRI43_HUMAN  | TRI43         | Q96BQ3; Q5TJ72                                                         | XP_304295; XP_210184; NP_620155 | Tripartite motif-containing protein 43                                                                                                                                                                                                                                                                                                                  | GO:0005622; GO:0005515; GO:0008270                                                                                                                                                                                                                                     | intracellular; protein binding; zinc ion binding                                                                                                                                                                                                                                                                                                                                                                                                                                                                                                                                                                                                                                                    |                      |                                   |                                       |                                       |                                    |        |
| 986 GNAT2    | GNAT2_HUMAN  | GNAT2; Q5T697 | P19087; Q5T697                                                         | NP_005263                       | Guanine nucleotide-binding protein G(I) subunit alpha 2 (Transducin alpha-2 chain); Guanine nucleotide binding protein (G protein), alpha transducing activity polypeptide 2 (Guanine nucleotide binding protein (G protein), alpha transducing activity polypeptide 2, isoform CRA_a)                                                                  | GO:0008020; GO:0007186; GO:0005525; GO:0008524; GO:0003107; GO:0042622; GO:0007186; GO:0004594; GO:0004871                                                                                                                                                             | G-protein coupled photoreceptor activity; G-protein coupled receptor protein signaling pathway; signaling pathway; GTP binding; heterotrimeric G-protein complex; photoreceptor inner segment; photoreceptor outer segment membrane; phototransduction; G-protein coupled receptor protein signaling pathway; retinal cone cell development; signal transducer activity                                                                                                                                                                                                                                                                                                                             |                      |                                   |                                       |                                       |                                    |        |
| 987 HEBP1    | HEBP1_HUMAN  | HEBP1; ABK1G2 | Q9NRV9; Q9V5Z5; ABK1G2                                                 | NP_057071                       | Heme-binding protein 1 (p22HBP)                                                                                                                                                                                                                                                                                                                         | GO:0007623                                                                                                                                                                                                                                                             | cell cortex; cytoskeleton; lamellipodium; protein binding; ruffle; soluble fraction                                                                                                                                                                                                                                                                                                                                                                                                                                                                                                                                                                                                                 | Cytoplasm            | cytoskeleton                      |                                       |                                       |                                    |        |
| 988 GBB2     | GBB2_HUMAN   | GBB2; Q6FHM2  | P62879; Q6FHM2; P110320; P54312                                        | NP_005264                       | Guanine nucleotide-binding protein G(I)/G(S)/G(T) subunit beta-2 (Transducin beta chain 2) (G protein subunit beta-2); GNB2 protein (cDNA FL377321, highly similar to Homo sapiens guanine nucleotide binding protein (G protein), beta polypeptide 2 (GNB2), mRNA) (Guanine nucleotide binding protein (G protein), beta polypeptide 2, isoform CRA_a) | GO:0007186; GO:0005524; GO:0004871; GO:0005246                                                                                                                                                                                                                         | G-protein coupled receptor protein signaling pathway; GTPase activity; hormone-mediated signaling; signal transducer activity; calcium channel regulator activity                                                                                                                                                                                                                                                                                                                                                                                                                                                                                                                                   |                      |                                   |                                       | Known in Uniprot to be phosphorylated |                                    |        |
| 989 SRC8     | SRC8_HUMAN   | SRC8; Q53HG7  | Q14247; Q53HG7                                                         | NP_005222                       | Src substrate cortactin (Amplixin) (Oncogene EMS1)                                                                                                                                                                                                                                                                                                      | GO:0005938; GO:0005856; GO:0030027; GO:0005515; GO:0001276; GO:0005525                                                                                                                                                                                                 | cell cortex; cytoskeleton; lamellipodium; protein binding; ruffle; soluble fraction                                                                                                                                                                                                                                                                                                                                                                                                                                                                                                                                                                                                                 | Cytoplasm            | cytoskeleton                      |                                       | Known in Uniprot to be phosphorylated | Known in HPRD to be phosphorylated |        |
| 990 LCK      | LCK_HUMAN    | LCK; Q7RTZ3   | P06239; P07100; Q12850; Q13152; Q5TDH8; Q5TDH9; Q7RTZ3; Q96D04; Q9VY78 | NP_005347; NP_001306; 236       | Proto-oncogene tyrosine-protein kinase LCK (EC 2.7.10.2) (Lymphocyte cell-specific protein-tyrosine kinase) (p56-LCK) (LSK) (T cell-specific protein-tyrosine kinase)                                                                                                                                                                                   | GO:0005524; GO:0005117; GO:0042609; GO:0042610; GO:0005794; GO:0007265; GO:0042169; GO:0006919; GO:0006882; GO:0005939; GO:0001948; GO:0006917; GO:0044419; GO:0004715; GO:0000242; GO:0043548; GO:0005886; GO:0008022; GO:0019901; GO:0004722; GO:0051209; GO:0042493 | ATP binding; ATPase binding; CD4 receptor binding; CD8 receptor binding; Golgi apparatus; Ras protein signal transduction; SH2 domain binding; activation of caspase activity; cellular zinc ion homeostasis; cytosol; glycoprotein binding; induction of apoptosis; interspecies interaction between organisms; membrane raft; non membrane spanning protein tyrosine kinase activity; pericentriolar material; phosphoinositide 3-kinase binding; plasma membrane; positive regulation of T cell receptor signaling pathway; protein C-terminus binding; protein kinase binding; protein serine/threonine phosphatase activity; release of sequestered calcium ion into cytosol; response to drug | Cytoplasm            | Cell membrane                     |                                       | Known in Uniprot to be phosphorylated | Known in HPRD to be phosphorylated | Kinase |
| 991 A1BG     | A1BG_HUMAN   | A1BG; Q6CK60  | Q6CK60; P04217; Q8YJ6; Q9AP39                                          | NP_570602                       | Alpha-1B-glycoprotein (Alpha-1-B glycoprotein)                                                                                                                                                                                                                                                                                                          | GO:0005576                                                                                                                                                                                                                                                             | extracellular region                                                                                                                                                                                                                                                                                                                                                                                                                                                                                                                                                                                                                                                                                | Secreted             |                                   |                                       |                                       |                                    |        |
| 992 TFZLY    | TFZLY_HUMAN  | TFZLY; A2VCU1 | Q8LUE0; A2VCU1                                                         | NP_631960                       | Homeobox protein TGIF2LY (TGF-beta-induced factor 2-like protein, Y-linked) (TGIF-like on the Y); cDNA FL175815, highly similar to Homo sapiens TGF-beta-induced factor 2-like, Y-linked (TGIF2LY), mRNA (TGF-beta-induced factor homeobox 2-like, Y-linked)                                                                                            | GO:0005634; GO:0006355; GO:0043365; GO:0003700                                                                                                                                                                                                                         | nucleus; regulation of transcription, DNA-dependent; sequence-specific DNA binding; transcription factor activity                                                                                                                                                                                                                                                                                                                                                                                                                                                                                                                                                                                   | Nucleus              |                                   |                                       |                                       |                                    |        |
| 993 ATS17    | ATS17_HUMAN  | ATS17         | Q8TE56                                                                 | NP_620688                       | A disintegrin and metalloprotease with thrombospondin motifs 17 (ADAMTS-17) (ADAMTS 17) (ADAM-TS17) (EC 3.4.24.-)                                                                                                                                                                                                                                       | GO:0004222; GO:0005578; GO:0006508; GO:0002900; GO:0045155; GO:0020037; GO:0042610; GO:0005743; GO:0006810                                                                                                                                                             | metalloendopeptidase activity; proteolysis; extracellular matrix; proteolysis; zinc ion binding; electron transport chain; electron transporter; transferring electrons from CoQH2-cytochrome c reductase complex and cytochrome c oxidase complex                                                                                                                                                                                                                                                                                                                                                                                                                                                  | Secreted             | extracellular matrix              |                                       |                                       |                                    |        |
| 994 CY1      | CY1_HUMAN    | CY1           | P08574; Q5U062; Q6FH57                                                 | NP_001907                       | Cytochrome c1, heme protein, mitochondrial (Ubiquinol-cytochrome c reductase complex cytochrome c1 subunit) (Cytochrome c-1) (Cytochrome b-c1 complex subunit 4) (Complex III subunit 4) (Complex III subunit IV)                                                                                                                                       | GO:0005524; GO:0008270; GO:0005576; GO:0006886; GO:0005576; GO:0004717; GO:0005573; GO:0030145; GO:0008235; GO:0000508                                                                                                                                                 | cytochrome c reductase activity; cytoplasm; manganese ion binding; metallooxo-peptidase activity; proteolysis                                                                                                                                                                                                                                                                                                                                                                                                                                                                                                                                                                                       | Cytoplasm            |                                   |                                       |                                       |                                    |        |
| 995 QBSS56   | QBSS56_HUMAN | QBSS56        | Q9BSS6                                                                 | NP_005596                       | Serine/threonine protein phosphatase (EC 3.1.3.16)                                                                                                                                                                                                                                                                                                      | GO:0005506; GO:0004721                                                                                                                                                                                                                                                 | iron ion binding; phosphoprotein phosphatase activity                                                                                                                                                                                                                                                                                                                                                                                                                                                                                                                                                                                                                                               |                      |                                   |                                       |                                       | Phosphatase                        |        |
| 995 CGL      | CGL_HUMAN    | CGL; Q53Y79   | P32929; Q53Y79; Q53P83; Q9H4W7; Q9H4W8                                 | NP_001893; NP_714964            | Cystathionine gamma-lyase (EC 4.4.1.1) (Gamma-cystathionase); Cystathionase (Cystathionine gamma-lyase) (Cystathionase (Cystathionine gamma-lyase), isoform CRA_a)                                                                                                                                                                                      | GO:0004123; GO:0019344; GO:0003737; GO:0030170; GO:0004121; GO:0006749; GO:0005667; GO:0030308; GO:0008285                                                                                                                                                             | cystathionine gamma-lyase activity; cysteine biosynthetic process; cytoplasm; pyridoxal phosphate binding; cystathionine beta-lyase activity; glutathione metabolic process; homocysteine metabolic process; negative regulation of cell growth; negative regulation of cell proliferation                                                                                                                                                                                                                                                                                                                                                                                                          | Cytoplasm            |                                   | Known in Uniprot to be phosphorylated |                                       |                                    |        |
| 999 STK25    | STK25_HUMAN  | STK25; ABK7D2 | Q00506; Q15522; Q50JF1; ABK7D2                                         | NP_006365                       | Serine/threonine-protein kinase 25 (EC 2.7.1.1) (Sterile 20/oxidant stress-response kinase 1) (Ste20/oxidant stress response kinase 1) (SOK-1) (Ste20-like kinase)                                                                                                                                                                                      | GO:0005524; GO:0005794; GO:0042802; GO:0000297; GO:0006468; GO:004674; GO:0006979; GO:0005737; GO:0005980; GO:0008184; GO:0003170                                                                                                                                      | ATP binding; Golgi apparatus; identical protein binding; magnesium ion binding; protein amino acid phosphorylation; protein serine/threonine kinase activity; response to oxidative stress; signal transduction                                                                                                                                                                                                                                                                                                                                                                                                                                                                                     | Cytoplasm            | Golgi apparatus                   |                                       | Known in Uniprot to be phosphorylated | Kinase                             |        |
| 1000 PYGB    | PYGB_HUMAN   | PYGB          | P11216; Q96AK1; Q9NPK8                                                 | NP_002853                       | Glycogen phosphorylase, brain form (EC 2.4.1.1)                                                                                                                                                                                                                                                                                                         | GO:0005737; GO:0005980; GO:0008184; GO:0003170                                                                                                                                                                                                                         | cytoplasm; glycogen catabolic process; glycogen phosphorylase activity; pyridoxal phosphate binding                                                                                                                                                                                                                                                                                                                                                                                                                                                                                                                                                                                                 |                      |                                   |                                       | Known in Uniprot to be phosphorylated |                                    |        |

| Protein Name | Uniprot Name | Other Names           | Uniprot ID                                                                     | Refseq IDs               | Protein Description                                                                                                                                                                                                                                                 | GO ID                                                                                                                                                                                                                                                                                          | GO terms                                                                                                                                                                                                                                                                                                                                                                                                                                                                                                                                                                                                                                                                                                                                             | Subcellular location                                                            | Comments | Comments                              | Comments - Database Search            | Comments - Database Search            | Function |
|--------------|--------------|-----------------------|--------------------------------------------------------------------------------|--------------------------|---------------------------------------------------------------------------------------------------------------------------------------------------------------------------------------------------------------------------------------------------------------------|------------------------------------------------------------------------------------------------------------------------------------------------------------------------------------------------------------------------------------------------------------------------------------------------|------------------------------------------------------------------------------------------------------------------------------------------------------------------------------------------------------------------------------------------------------------------------------------------------------------------------------------------------------------------------------------------------------------------------------------------------------------------------------------------------------------------------------------------------------------------------------------------------------------------------------------------------------------------------------------------------------------------------------------------------------|---------------------------------------------------------------------------------|----------|---------------------------------------|---------------------------------------|---------------------------------------|----------|
| 1001 RGA1    | RGA1_HUMAN   | RGA1                  | Q5H8H5; Q6P126; Q9HWN2; Q9P250; NP_0011195 Q9P2W2                              | NP_037409; NP_001119 76  | Rac GTPase-activating protein 1 (Male germ cell RacGap) (MjRacGAP)                                                                                                                                                                                                  | GO:0005096; GO:0001669; GO:0043014; GO:0004848; GO:0000915; GO:0007108; GO:0019992; GO:0009790; GO:0043015; GO:0007242; GO:0005874; GO:0007405; GO:0005634; GO:0008022; GO:0007283; GO:0005819; GO:0008272; GO:0008270                                                                         | GTPase activator activity; acrosomal vesicle; alpha-tubulin binding; beta-tubulin binding; cytokinesis, contractile ring formation; cytokinesis, initiation of separation; diacylglycerol binding; embryonic development; gamma-tubulin binding; intracellular signaling cascade; microtubule; neuroblast proliferation; nucleus; protein C-terminus binding; spermatogenesis; spindle; sulfate transport; zinc ion binding                                                                                                                                                                                                                                                                                                                          | Nucleus; Cytoplasm; Spin dieAcrosome                                            |          |                                       | Known in Uniprot to be phosphorylated | Known in Uniprot to be phosphorylated |          |
| 1002 ZAAA    | ZAAA_HUMAN   | ZAAA; ABK7B7          | Q96DH3; P30153; Q13773; Q10323; ABK7B7                                         | NP_055040                | Serine/threonine-protein phosphatase 2A 65 kDa regulatory subunit A alpha isoform (PP2A, subunit A, PR65-alpha isoform) (PP2A, subunit A, R1-alpha isoform) (Medium tumor antigen-associated 61 kDa protein)                                                        | GO:0008380; GO:0003823; GO:0006672; GO:0005052; GO:0001888; GO:0016200; GO:0015630; GO:0005739; GO:0030308; GO:0042518; GO:0005834; GO:0006470; GO:0006461; GO:0046982; GO:0001159; GO:0008601; GO:0006275; GO:0003015; GO:0045595; GO:0045449; GO:0010033; GO:0005625                         | RNA splicing; antigen binding; ceramide metabolic process; cytosol; inactivation of MAPK activity; induction of apoptosis; membrane; microtubule cytoskeleton; mitochondrion; negative regulation of cell growth; negative regulation of tyrosine phosphorylation of Stat3 protein; nucleus; protein amino acid phosphorylation; protein complex assembly; protein heterodimerization activity; protein phosphatase type 2A complex; protein phosphatase type 2A regulator activity; regulation of DNA replication; regulation of Wnt receptor signaling pathway; regulation of cell adhesion; regulation of cell differentiation; regulation of transcription; response to organic substance; second-messenger-mediated signaling; soluble fraction |                                                                                 |          |                                       |                                       | Phosphatase                           |          |
| 1003 RRA52   | RRA52_HUMAN  | RRA52; B2R9Z3         | P62070; P17082; B2R9Z3                                                         | NP_036382; NP_001096 139 | Ras-related protein R-Ras2 (Ras-like protein TC21) (Teratocarcinoma oncogene)                                                                                                                                                                                       | GO:0005525; GO:0003924; GO:0005733; GO:0005886; GO:0005130; GO:0007059; GO:0007067; GO:0005634; GO:0005515; GO:0042101; GO:0005737; GO:0005178; GO:0007229; GO:0044419; GO:0007139; GO:0030593; GO:0004715; GO:0005634; GO:0009887; GO:0003924; GO:0015078; GO:0005759; GO:0000276; GO:0005515 | GTP binding; GTPase activity; endoplasmic reticulum; plasma membrane; protein binding                                                                                                                                                                                                                                                                                                                                                                                                                                                                                                                                                                                                                                                                | Cell membrane; Lipidanc hor; Cytoplasm; ciside                                  |          |                                       | Known in Uniprot to be phosphorylated | Known in Uniprot to be phosphorylated |          |
| 1004 CA048   | CA048_HUMAN  | CA048; Q5FM72; NLS1   | Q9EY11; Q5Y757; Q9H2M5; Q9HNR6; Q9Y415; Q5Y8M2                                 | NP_056286                | Kinetochore-associated protein NLS1 homolog; Chromosome 1 open reading frame 48 variant (Chromosome 1 open reading frame 48, isoform CRA_a) (Fragment)                                                                                                              | GO:0005444; GO:0005130; GO:0007059; GO:0007067; GO:0005634; GO:0005515; GO:0005529; GO:0005737; GO:0005178; GO:0007229; GO:0044419; GO:0007139; GO:0030593; GO:0004715; GO:0005634; GO:0009887; GO:0003924; GO:0015078; GO:0005759; GO:0000276; GO:0005515                                     | MIS12/PHO2 type complex; cell division; chromosome segregation; mitosis; nucleus; protein binding                                                                                                                                                                                                                                                                                                                                                                                                                                                                                                                                                                                                                                                    | Nucleus; Kinetochore;                                                           |          |                                       | Known in Uniprot to be phosphorylated | Known in Uniprot to be phosphorylated |          |
| 1005 KSYK    | KSYK_HUMAN   | KSYK; Q5T6N7; ABK4G2  | Q9H405; Q5T6N7; ABK4G2                                                         | NP_003168                | Tyrosine-protein kinase SYK (EC 2.7.10.2) (Spleen tyrosine kinase)                                                                                                                                                                                                  | GO:0005525; GO:0005524; GO:0042101; GO:0005737; GO:0005178; GO:0007229; GO:0044419; GO:0007139; GO:0030593; GO:0004715; GO:0005634; GO:0009887; GO:0003924; GO:0015078; GO:0005759; GO:0000276; GO:0005515                                                                                     | ATP binding; T cell receptor complex; cytoplasm; integrin binding; integrin-mediated signaling pathway; interspecies interaction between organisms; leukocyte adhesion; neutrophil chemotaxis; non-membrane spanning protein tyrosine kinase activity; nucleus; organ morphogenesis; protein complex assembly                                                                                                                                                                                                                                                                                                                                                                                                                                        |                                                                                 |          | Known in Uniprot to be phosphorylated | Known in Uniprot to be phosphorylated | Kinase                                |          |
| 1006 ATSF1   | ATSF1_HUMAN  | ATSF1; Q0BET0         | P24539; Q9BQ68; Q9BRU8; Q0BET0                                                 | NP_001679                | ATP synthase subunit b, mitochondrial; Cell proliferation-inducing protein 47 (HCG39985, isoform CRA_a) (cDNA, FL94101, Homo sapiens ATP synthase, H+ transporting, mitochondrial F0 complex, subunit b, isoform 1 (ATPSF1), mRNA)                                  | GO:0005525; GO:0005524; GO:0042101; GO:0005737; GO:0005178; GO:0007229; GO:0044419; GO:0007139; GO:0030593; GO:0004715; GO:0005634; GO:0009887; GO:0003924; GO:0015078; GO:0005759; GO:0000276; GO:0005515                                                                                     | ATP synthesis coupled proton transport; hydrogen ion transmembrane transporter activity; mitochondrial matrix; mitochondrial protein-transporting ATP synthase complex, coupling factor F(o); protein binding                                                                                                                                                                                                                                                                                                                                                                                                                                                                                                                                        | Mitochondrion; Mitochon drion; membrane;                                        |          |                                       | Known in Uniprot to be phosphorylated | Known in Uniprot to be phosphorylated |          |
| 1007 TOLIP   | TOLIP_HUMAN  | TOLIP; Q5FTE9         | Q9H0E2; Q5FTE9; Q9H9E6; Q9H369                                                 | NP_061882                | Toll-interacting protein; TOLLIP protein (Toll interacting protein) (Toll interacting protein, isoform CRA_a) (cDNA, FL96670, Homo sapiens toll interacting protein (TOLLIP), mRNA)                                                                                 | GO:0005121; GO:0007267; GO:0005737; GO:0005529; GO:0006954; GO:0045233; GO:0004992; GO:0007242; GO:0045231; GO:0016310; GO:0004871; GO:0005529; GO:0006006; GO:0000287; GO:0004614                                                                                                             | Toll binding; cell-cell signaling; cytoplasm; immune response; inflammatory response; interleukin-1 receptor complex; interleukin-18 receptor complex; intracellular signaling cascade; leukocyte activation; phosphorylation; signal transducer activity                                                                                                                                                                                                                                                                                                                                                                                                                                                                                            | Cytoplasm;                                                                      |          |                                       | Known in Uniprot to be phosphorylated | Known in Uniprot to be phosphorylated | Kinase   |
| 1008 PGM1    | PGM1_HUMAN   | PGM1                  | P36871; Q16105; Q5BKZ9; Q6HW22; Q86U74; Q9GJ40; Q9HXY4                         | NP_002624                | Phosphoglucomutase-1 (PGM 1) (EC 5.4.2.2) (Glucose phosphomutase 1)                                                                                                                                                                                                 | GO:0005525; GO:0006006; GO:0000287; GO:0004614                                                                                                                                                                                                                                                 | cytosol; glucose metabolic process; magnesium ion binding                                                                                                                                                                                                                                                                                                                                                                                                                                                                                                                                                                                                                                                                                            | Cytoplasm                                                                       |          |                                       | Known in Uniprot to be phosphorylated | Known in Uniprot to be phosphorylated |          |
| 1009 CF055   | CF055_HUMAN  | CF055; Q5TGM1; VTA1   | Q9N979; Q5TGM1; Q61A8E; Q9H0R2; Q9H3K9; Q9H0D0                                 | NP_057569                | Vacuolar protein sorting-associated protein VTA1 homolog (Dopamine-responsive protein DRG-1) (SKI1 binding protein 1) (SRP1) (LYST-interacting protein 5) (LIPS)                                                                                                    | GO:0005525; GO:0005524; GO:0042101; GO:0005737; GO:0005178; GO:0007229; GO:0044419; GO:0007139; GO:0030593; GO:0004715; GO:0005634; GO:0009887; GO:0003924; GO:0015078; GO:0005759; GO:0000276; GO:0005515                                                                                     |                                                                                                                                                                                                                                                                                                                                                                                                                                                                                                                                                                                                                                                                                                                                                      | Cytoplasm; Endosome; membrane; peripheral membrane protein                      |          |                                       | Known in Uniprot to be phosphorylated | Known in Uniprot to be phosphorylated |          |
| 1010 CAND1   | CAND1_HUMAN  | CAND1; B2RAU3         | Q86V96; Q9A918; Q6YF14; Q8ND34; Q9K329; Q9E119; Q9B7C4; Q9H0G2; Q9PH07; Q9U8F5 | NP_060918                | Cullin-associated NEBD8-dissociated protein 1 (Cullin-associated and neddylation-dissociated protein 1) (p120 CAND1) (TBP-interacting protein TIP120A) (TBP-interacting protein of 120 kDa A)                                                                       | GO:0003154; GO:0019941; GO:0005737; GO:0005634; GO:0005515; GO:0016567; GO:0000151                                                                                                                                                                                                             | cell differentiation; modification-dependent protein catabolic process; negative regulation of catalytic activity; nucleus; protein binding; protein ubiquitination; ubiquitin ligase complex                                                                                                                                                                                                                                                                                                                                                                                                                                                                                                                                                        | Nucleus                                                                         |          |                                       | Known in Uniprot to be phosphorylated | Known in Uniprot to be phosphorylated |          |
| 1011 NDUAD   | NDUAD_HUMAN  | NDUAD                 | B2RAU3; Q9R0D0; Q9PKD0; Q9K3L3; Q9Y327                                         | NP_057049                | NADH dehydrogenase [ubiquinone] 1 alpha subcomplex subunit 13 (NADH-ubiquinone oxidoreductase B16.6 subunit) (Complex I-B16.6) (CI-B16.6) (Gene associated with retinoid-interferon-induced mortality 19 protein) (GRIM-19) (Cell death regulatory protein GRIM-19) | GO:0005524; GO:0008137; GO:0003924; GO:0022900; GO:0008624; GO:0016021; GO:0005747; GO:0030308; GO:0045892; GO:0017148; GO:0005634; GO:0006800; GO:0005515; GO:0003723; GO:0015010; GO:0016422; GO:0016607                                                                                     | ATP binding; NADH dehydrogenase (ubiquinone) activity; apoptotic nuclear changes; electron transport chain; induction of apoptosis by extracellular signals; integral to membrane; mitochondrial respiratory chain complex I; negative regulation of cell growth; negative regulation of transcription, DNA-dependent; negative regulation of translation; nucleoplasm; oxygen and reactive oxygen species metabolic process; protein binding; protein import into nucleus                                                                                                                                                                                                                                                                           | Mitochondrion; inner membrane; Spin; membrane; Nucleus                          |          |                                       | Known in Uniprot to be phosphorylated | Known in Uniprot to be phosphorylated |          |
| 1012 MTA70   | MTA70_HUMAN  | MTA70                 | Q86U44; Q14736; Q86V05; Q9H832                                                 | NP_062826                | N6-adenosine-methyltransferase 70 kDa subunit (MT-A70) (EC 2.1.1.62) (Methyltransferase-like protein 3)                                                                                                                                                             | GO:0005525; GO:0001399; GO:0005739; GO:0005886; GO:0015031; GO:0008013                                                                                                                                                                                                                         | GTP binding; RNA methylation; mRNA (2'-O-methyladenosine-N6-)-methyltransferase activity; nuclear speck                                                                                                                                                                                                                                                                                                                                                                                                                                                                                                                                                                                                                                              | Nucleus; speckle                                                                |          |                                       | Known in Uniprot to be phosphorylated | Known in Uniprot to be phosphorylated |          |
| 1013 RAB2B   | RAB2B_HUMAN  | RAB2B; B2RD03         | Q8WUD1; B2RD03                                                                 | NP_116235                | Ras-related protein Rab-2B                                                                                                                                                                                                                                          | GO:0005525; GO:0001399; GO:0005739; GO:0005886; GO:0015031; GO:0008013                                                                                                                                                                                                                         | GTP binding; Golgi membrane; endoplasmic reticulum membrane; plasma membrane; protein transport; small GTPase mediated signal transduction; vesicle-mediated transport                                                                                                                                                                                                                                                                                                                                                                                                                                                                                                                                                                               | Cell membrane; Lipidanc hor; Cytoplasm; ciside; Endoplasmic reticulum; membrane |          |                                       | Known in Uniprot to be phosphorylated | Known in Uniprot to be phosphorylated |          |
| 1014 LZIC    | LZIC_HUMAN   | LZIC; B2RF60          | Q8WZAO; Q96U01; B2RF60                                                         | NP_115744                | Protein LZIC (Leucine zipper and ICAT homologous domain-containing protein) (Leucine zipper and CTNBP1 domain-containing protein)                                                                                                                                   | GO:0005525; GO:0001399; GO:0005739; GO:0005886; GO:0015031; GO:0008013                                                                                                                                                                                                                         | beta-catenin binding                                                                                                                                                                                                                                                                                                                                                                                                                                                                                                                                                                                                                                                                                                                                 |                                                                                 |          |                                       | Known in Uniprot to be phosphorylated | Known in Uniprot to be phosphorylated |          |
| 1015 JKIP1   | JKIP1_HUMAN  | Q96N16; Q8Q699; JKIP1 | Q96N16; A6H222; A6H224; A6H225; ABMTK6; Q86Y69; Q8H7C3                         | NP_653321; NP_001092 903 | Janus kinase and microtubule-interacting protein 1 (GABA-B receptor-binding protein) (Multiple alpha-helices and RNA-linker protein 1) (Merlin-1)                                                                                                                   | GO:0005081; GO:0003723; GO:0016020; GO:0005874; GO:0000300; GO:0015031; GO:0030529                                                                                                                                                                                                             | GABA receptor binding; RNA binding; cytoplasm; membrane; microtubule; peripheral to membrane of membrane fraction; protein transport; ribonucleoprotein complex                                                                                                                                                                                                                                                                                                                                                                                                                                                                                                                                                                                      | Cytoplasm; cytoskeleton; Membrane; peripheral membrane protein                  |          |                                       | Known in Uniprot to be phosphorylated | Known in Uniprot to be phosphorylated |          |
| 1016 CC138   | CC138_HUMAN  | Q96M89; CC138         | Q96M89; Q5DF11; Q45607; Q53TE1; Q6ZUYS; Q8W127                                 | NP_659415                | Coiled-coil domain-containing protein 138                                                                                                                                                                                                                           | GO:0017124; GO:0005516; GO:0005939; GO:0019992; GO:0042802; GO:0007242; GO:0007049; GO:0005886; GO:0016272; GO:0006457; GO:0003700; GO:0005509; GO:0007586; GO:0043942; GO:0005615; GO:0005515; GO:0006508; GO:0004252; GO:0031638; GO:0006508                                                 | SH3 domain binding; calmodulin binding; cilium; flagellum                                                                                                                                                                                                                                                                                                                                                                                                                                                                                                                                                                                                                                                                                            | Cell projection; cilium; flagellum                                              |          |                                       | Known in Uniprot to be phosphorylated | Known in Uniprot to be phosphorylated |          |
| 1017 ENKUR   | ENKUR_HUMAN  | ENKUR; ABK8Y0         | Q8TC29; ABK8Y0                                                                 | NP_659447                | Enkurin                                                                                                                                                                                                                                                             | GO:0017124; GO:0005516; GO:0005939; GO:0019992; GO:0042802; GO:0007242; GO:0007049; GO:0005886; GO:0016272; GO:0006457; GO:0003700; GO:0005509; GO:0007586; GO:0043942; GO:0005615; GO:0005515; GO:0006508; GO:0004252; GO:0031638; GO:0006508                                                 | SH3 domain binding; calmodulin binding; cilium; flagellum                                                                                                                                                                                                                                                                                                                                                                                                                                                                                                                                                                                                                                                                                            | Cell projection; cilium; flagellum                                              |          |                                       | Known in Uniprot to be phosphorylated | Known in Uniprot to be phosphorylated |          |
| 1018 STAC3   | STAC3_HUMAN  | STAC3                 | Q96MF2; Q96HUS                                                                 | NP_659501                | SH3 and cysteine-rich domain-containing protein 3                                                                                                                                                                                                                   | GO:0017124; GO:0005516; GO:0005939; GO:0019992; GO:0042802; GO:0007242; GO:0007049; GO:0005886; GO:0016272; GO:0006457; GO:0003700; GO:0005509; GO:0007586; GO:0043942; GO:0005615; GO:0005515; GO:0006508; GO:0004252; GO:0031638; GO:0006508                                                 | SH3 domain binding; calmodulin binding; cilium; flagellum                                                                                                                                                                                                                                                                                                                                                                                                                                                                                                                                                                                                                                                                                            | Cell projection; cilium; flagellum                                              |          |                                       | Known in Uniprot to be phosphorylated | Known in Uniprot to be phosphorylated |          |
| 1019 PFD1    | PFD1_HUMAN   | PFD1; B2RD02          | Q69925; Q5Y9F9; Q9SEK6; B2RD02                                                 | NP_002613                | Prefoldin subunit 1                                                                                                                                                                                                                                                 | GO:0005525; GO:0001399; GO:0005739; GO:0005886; GO:0015031; GO:0008013                                                                                                                                                                                                                         | diacylglycerol binding; identical protein binding; intracellular signaling cascade; zinc ion binding                                                                                                                                                                                                                                                                                                                                                                                                                                                                                                                                                                                                                                                 |                                                                                 |          |                                       | Known in Uniprot to be phosphorylated | Known in Uniprot to be phosphorylated |          |
| 1020 TRY3    | TRY3_HUMAN   | TRY3; Q61534          | Q61534; P35030; P15951; Q15665; Q5YXV0; Q9VQV3                                 | NP_002762                | Trypsin-3 (EC 3.4.21.4) (Trypsin III) (Brain trypsinogen) (Mesotrypsinogen) (Trypsin IV) (Serine protease 3) (Serine protease 4); Protease, serine, 3 (Mesotrypsinogen) (Protease, serine, 3 (Mesotrypsin), isoform CRA_b)                                          | GO:0005509; GO:0007586; GO:0043942; GO:0005615; GO:0005515; GO:0006508; GO:0004252; GO:0031638; GO:0006508                                                                                                                                                                                     | calcium ion binding; digestion; endothelial cell migration; extracellular space; protein binding; proteolysis; serine-type endopeptidase activity; zymogen activation; proteolysis                                                                                                                                                                                                                                                                                                                                                                                                                                                                                                                                                                   | Secreted;                                                                       |          |                                       | Known in Uniprot to be phosphorylated | Known in Uniprot to be phosphorylated |          |









| Protein Name | Uniprot Name | Other Names                   | Uniprot                                                                                                     | Refseq IDs                             | Protein Description                                                                                                                                                                                                                                                                            | GO ID                                                                                                                                                                                                                                        | GO terms                                                                                                                                                                                                                                                                                                                                                                                                                                                                                                                                                                      | Subcellular location                                                                               | Comments | Comments                              | Comments - Database Search            | Comments - Database Search | Function |
|--------------|--------------|-------------------------------|-------------------------------------------------------------------------------------------------------------|----------------------------------------|------------------------------------------------------------------------------------------------------------------------------------------------------------------------------------------------------------------------------------------------------------------------------------------------|----------------------------------------------------------------------------------------------------------------------------------------------------------------------------------------------------------------------------------------------|-------------------------------------------------------------------------------------------------------------------------------------------------------------------------------------------------------------------------------------------------------------------------------------------------------------------------------------------------------------------------------------------------------------------------------------------------------------------------------------------------------------------------------------------------------------------------------|----------------------------------------------------------------------------------------------------|----------|---------------------------------------|---------------------------------------|----------------------------|----------|
| 1088 NAV1    | NAV1_HUMAN   | QBNEY1; NAV1                  | Q8NEY1; Q5VH1; Q5SVH2; Q5SVH3; Q5SVH7; Q5VJY9; Q8BL2; Q9611; Q9H799; Q9H959; Q9H975; Q9J621; Q9ULK7; Q9ULR9 | NP_065176                              | Neuron navigator 1 (Steerin-1) (Pore membrane and/or filament-interacting-like protein 3) (Unc-53 homolog 1) (unc53H1)                                                                                                                                                                         | GO:0030154; GO:0005737; GO:0005874; GO:0007399; GO:0017111; GO:0000166                                                                                                                                                                       | cell differentiation; cytoplasm; microtubule; nervous system development; nucleoside-triphosphatase activity; nucleoside binding                                                                                                                                                                                                                                                                                                                                                                                                                                              | Cytoplasm; cytoskeleton                                                                            |          |                                       | Known in Uniprot to be phosphorylated |                            |          |
| 1089 TIM16   | TIM16_HUMAN  | TIM16                         | Q913D7; Q61923; Q9H5X3                                                                                      | NP_057153                              | Mitochondrial import inner membrane translocase subunit Tim16 (Mitochondria-associated granulocyte macrophage CSF-signaling molecule)                                                                                                                                                          | GO:0065002; GO:0005743                                                                                                                                                                                                                       | intracellular protein transmembrane transport; mitochondrial inner membrane                                                                                                                                                                                                                                                                                                                                                                                                                                                                                                   | Mitochondrion; inner membrane; Peripheral membrane protein                                         |          |                                       |                                       |                            |          |
| 1090 HS70L   | HS70L_HUMAN  | HS70L; HS71L                  | F34931; A6NBD0; B0LXW8; Q76K34; Q2HXR3; Q9NEZ2; Q9QCC9; Q9UQM1; Q96NK8; Q548T5; Q9H3H6                      | NP_005518                              | Heat shock 70 kDa protein 1L (Heat shock 70 kDa protein 1-like) (Heat shock 70 kDa protein 1-Hom) (HSP70-Hom)                                                                                                                                                                                  | GO:0005524; GO:0006986                                                                                                                                                                                                                       | ATP binding; response to unfolded protein                                                                                                                                                                                                                                                                                                                                                                                                                                                                                                                                     |                                                                                                    |          |                                       |                                       |                            |          |
| 1091 NDF6    | NDF6_HUMAN   | NDF6; Q548T9                  | Q96NK8; Q548T5; Q9H3H6                                                                                      | NP_073565                              | Neurogenic differentiation factor 6 (NeuroD6) (Protein atonal homolog 2); MATH2 protein (Neurogenic differentiation 6) (cDNA FL178237, highly similar to Homo sapiens neurogenic differentiation 6 (NEUROD6), mRNA)                                                                            | GO:0003677; GO:0030134; GO:0007399; GO:0005534; GO:0006355; GO:0030528; GO:0005634; GO:0045449                                                                                                                                               | DNA binding; cell differentiation; nervous system development; nucleus; regulation of transcription, DNA-dependent; transcription regulator activity; nucleus; regulation of transcription                                                                                                                                                                                                                                                                                                                                                                                    | Nucleus;                                                                                           |          |                                       |                                       |                            |          |
| 1092 PO210   | PO210_HUMAN  | PO210                         | Q8TEM1; A6N956; Q9A980; Q6XG66; Q8NB11; Q9H6C8; Q9UFP3                                                      | NP_079199                              | Nuclear pore membrane glycoprotein 210 (POM210) (Nuclear pore gp210)                                                                                                                                                                                                                           | GO:0005789; GO:0005502; GO:0051028; GO:0031965; GO:0005643; GO:0005515                                                                                                                                                                       | endoplasmic reticulum membrane; intracellular protein transmembrane transport; mRNA transport; nuclear membrane; nuclear pore; protein binding                                                                                                                                                                                                                                                                                                                                                                                                                                | Nucleus; nuclear pore complex; Endoplasmic reticulum membrane; Single-pass type I membrane protein |          | Known in Uniprot to be phosphorylated | Known in Uniprot to be phosphorylated |                            |          |
| 1093 DENR    | DENR_HUMAN   | DENR                          | Q43583; Q91565                                                                                              | XP_113714; NP_003668                   | Density-regulated protein (DRP) (Protein DRP1) (Smooth muscle cell-associated protein 3) (SMAP-3)                                                                                                                                                                                              | GO:0003743; GO:0006413                                                                                                                                                                                                                       | translation initiation factor activity; translational initiation                                                                                                                                                                                                                                                                                                                                                                                                                                                                                                              |                                                                                                    |          |                                       | Known in Uniprot to be phosphorylated |                            |          |
| 1094 BRK1    | BRK1_HUMAN   | BRK1; B2R5E2                  | Q9UWU1; Q9H982; B2R5E2                                                                                      | NP_060932                              | Probable protein BRICK1 (Caderin-like protein 1)                                                                                                                                                                                                                                               | GO:0005737; GO:0005856                                                                                                                                                                                                                       | cytoplasm; cytoskeleton                                                                                                                                                                                                                                                                                                                                                                                                                                                                                                                                                       | Cytoplasm; cytoskeleton                                                                            |          |                                       |                                       |                            |          |
| 1095 PCDH1   | PCDH1_HUMAN  | Q8IUP2; PCDH1                 | Q8IUP2; Q8I374                                                                                              | NP_002578                              | Protocadherin-1 (Protocadherin-42) (PC42)                                                                                                                                                                                                                                                      | GO:0005599; GO:0005981; GO:0007267; GO:0007356; GO:0005887; GO:0007399; GO:0005515                                                                                                                                                           | calcium ion binding; cell-cell junction; cell-cell signaling; homophilic cell adhesion; integral to plasma membrane; nervous system development; protein binding                                                                                                                                                                                                                                                                                                                                                                                                              | Cell junction; Cell membrane; Single-pass type I membrane protein                                  |          | Known in Uniprot to be phosphorylated | Known in HPRD to be phosphorylated    |                            |          |
| 1096 CRLF3   | CRLF3_HUMAN  | Q9Y6M8; CRLF3                 | Q9Y6M8; Q8IUI8; A6A1F3; B2RKC1; Q2MLY7; Q9UN13                                                              | NP_057070                              | Cytokine receptor-like factor 3 (Cytokine receptor-related protein 4) (Cytokine receptor-like molecule 9) (CREME-9) (Type I cytokine receptor-like factor p48)                                                                                                                                 | GO:0005737; GO:0005886                                                                                                                                                                                                                       | cytoplasm; plasma membrane                                                                                                                                                                                                                                                                                                                                                                                                                                                                                                                                                    |                                                                                                    |          |                                       |                                       |                            |          |
| 1097 IDHC    | IDHC_HUMAN   | IDHC; Q6HQ6Q                  | Q78843; Q6HQ6Q; Q92090; Q9H795; Q9H982                                                                      | NP_005887                              | Iso citrate dehydrogenase (NADP) cytoplasmic (IDH) (EC 1.1.1.42) (Cytosolic NADP-isocitrate dehydrogenase) (Oxalosuccinate decarboxylase) (NADP+)-specific (IDH) (IDH1 protein (isocitrate dehydrogenase 1 (NADP+), soluble, isoform CRA_a) (Putative uncharacterized protein IDH1) (Fragment) | GO:0051287; GO:0005829; GO:0006097; GO:0004450; GO:0006102; GO:000287; GO:0030145; GO:0055114; GO:0005777; GO:0006099; GO:0005829; GO:0006749; GO:0051287; GO:0006097; GO:0004450; GO:0006102; GO:000287; GO:0030145; GO:0055114; GO:0005777 | NAD or NADH binding; cytosol; glyoxylate cycle; isocitrate dehydrogenase (NADP+) activity; isocitrate metabolic process; magnesium ion binding; manganese ion binding; oxidation reduction; peroxisome; tricarboxylic acid cycle; cytosol; glutathione metabolic process; response to oxidative stress                                                                                                                                                                                                                                                                        | Cytoplasm; Peroxisome;                                                                             |          |                                       |                                       |                            |          |
| 1098 IDHP    | IDHP_HUMAN   | IDHP; B2R6L6                  | Q48735; Q96G73; B2R6L6                                                                                      | NP_002159                              | Iso citrate dehydrogenase (NADP), mitochondrial (IDH) (EC 1.1.1.42) (Oxalosuccinate decarboxylase) (NADP+)-specific (IDH) (IDP) (CD-4)                                                                                                                                                         | GO:0051287; GO:0006097; GO:0004450; GO:0006102; GO:000287; GO:0030145; GO:0055114; GO:0005777                                                                                                                                                | NAD or NADH binding; glyoxylate cycle; isocitrate dehydrogenase (NADP+) activity; isocitrate metabolic process; magnesium ion binding; manganese ion binding; mitochondrial; oxidation reduction; tricarboxylic acid cycle                                                                                                                                                                                                                                                                                                                                                    | Mitochondrion                                                                                      |          |                                       |                                       |                            |          |
| 1099 NDUAB   | NDUAB_HUMAN  | NDUAB                         | Q86Y39; Q62566                                                                                              | NP_783313                              | NADH dehydrogenase [ubiquinone] 1 alpha subcomplex subunit 11 (NADH-ubiquinone oxidoreductase subunit B14.7) (Complex I-B14.7) (CI-B14.7)                                                                                                                                                      | GO:0022900; GO:0016021; GO:0005743; GO:0006810                                                                                                                                                                                               | electron transport chain; integral to membrane; mitochondrial inner membrane; transport                                                                                                                                                                                                                                                                                                                                                                                                                                                                                       | Mitochondrion; inner membrane; Matrix; oxidoreductase                                              |          |                                       |                                       |                            |          |
| 1100 CH042   | CH042_HUMAN  | Q86YL5; CH042                 | Q86YL5                                                                                                      | NP_778250                              | Uncharacterized protein C8orf42 (Protein INM01)                                                                                                                                                                                                                                                | GO:0006644; GO:0008270                                                                                                                                                                                                                       | protein modification process; zinc ion binding                                                                                                                                                                                                                                                                                                                                                                                                                                                                                                                                |                                                                                                    |          |                                       |                                       |                            |          |
| 1101 ANUB1   | ANUB1_HUMAN  | ANUB1; B2RAX2                 | Q86XD8; A8K8W4; Q5VY55; B2RAX2                                                                              | NP_777550; NP_001121                   | ANI-type zinc finger and ubiquitin domain-containing protein 1 (ANI-type zinc finger protein 4)                                                                                                                                                                                                | GO:0006644; GO:0008270                                                                                                                                                                                                                       | protein modification process; zinc ion binding                                                                                                                                                                                                                                                                                                                                                                                                                                                                                                                                |                                                                                                    |          |                                       |                                       |                            |          |
| 1102 TTBK2   | TTBK2_HUMAN  | TTBK2; Q8IWIY7                | Q8IWIY7; Q94932; Q62NS2; Q8IWI3                                                                             | NP_775771; XP_293277                   | Tau-tubulin kinase 2 (EC 2.7.11.1); Tau-tubulin kinase                                                                                                                                                                                                                                         | GO:0005524; GO:0008219; GO:0004674; GO:0045095; GO:0006468; GO:0004672; GO:0004249; GO:0016301; GO:0002087; GO:0009116; GO:0009156; GO:0004749                                                                                               | ATP binding; cell death; protein serine/threonine kinase activity; keratin filament; protein amino acid phosphorylation; protein kinase activity; structural molecule activity                                                                                                                                                                                                                                                                                                                                                                                                |                                                                                                    |          |                                       |                                       | Kinase                     |          |
| 1103 PRP53   | PRP53_HUMAN  | PRP53                         | P21108; Q6P5P6                                                                                              | NP_787082                              | Ribose-phosphate pyrophosphokinase 3 (EC 2.7.6.1) (Phosphoribosyl pyrophosphate synthetase III) (PRS-III) (Phosphoribosyl pyrophosphate synthetase I-like 1) (PRP53-I-like 1)                                                                                                                  | GO:0004672; GO:0004249; GO:0016301; GO:0002087; GO:0009116; GO:0009156; GO:0004749                                                                                                                                                           | cellular biosynthetic process; kinase activity; magnesium ion binding; nucleoside metabolic process; ribonucleoside monophosphate biosynthetic process; ribose phosphate diphosphokinase activity                                                                                                                                                                                                                                                                                                                                                                             |                                                                                                    |          |                                       |                                       |                            | Kinase   |
| 1104 FUND1   | FUND1_HUMAN  | FUND1                         | Q8IYV5                                                                                                      | NP_776155                              | FUN14 domain-containing protein 1                                                                                                                                                                                                                                                              |                                                                                                                                                                                                                                              |                                                                                                                                                                                                                                                                                                                                                                                                                                                                                                                                                                               |                                                                                                    |          |                                       | Known in Uniprot to be phosphorylated |                            |          |
| 1105 PSD13   | PSD13_HUMAN  | PSD13; Q53XU2                 | Q9UNM6; Q53XU2; Q75821; Q9UNV3                                                                              | NP_002808                              | 26S proteasome non-ATPase regulatory subunit 13 (26S proteasome regulatory subunit p40.5); Proteasome (Prosome, macropain) 26S subunit, non-ATPase, 13 (Proteasome (Prosome, macropain) 26S subunit, non-ATPase, 13, isoform CRA_a)                                                            | GO:0031145; GO:0005829; GO:0051436; GO:0051437; GO:0005838; GO:0005515; GO:0007127                                                                                                                                                           | anaphase-promoting complex-dependent professional ubiquitin-dependent protein catabolic process; cytosol; negative regulation of ubiquitin-protein ligase activity during mitotic cell cycle; positive regulation of ubiquitin-protein ligase activity during mitotic cell cycle; proteasome regulatory particle; protein binding; cytosol; meiosis 1                                                                                                                                                                                                                         |                                                                                                    |          | Known in Uniprot to be phosphorylated | Known in Uniprot to be phosphorylated |                            |          |
| 1106 BA2D1   | BA2D1_HUMAN  | Q9NSM8; Q9UF29; Q9Y520; BA2D1 | Q9Y520; Q9NSM8; Q9NSM8; Q49A39; Q6P2D4; Q9H2C2; Q9HAD5; Q9NVL3; Q9UF29; Q9UQP6                              | NP_055987                              | BAT2 domain-containing protein 1 (HBA2) transactivated protein 2)                                                                                                                                                                                                                              |                                                                                                                                                                                                                                              |                                                                                                                                                                                                                                                                                                                                                                                                                                                                                                                                                                               |                                                                                                    |          |                                       | Known in Uniprot to be phosphorylated |                            |          |
| 1107 XPO2    | XPO2_HUMAN   | XPO2; B2R5T4                  | Q91RQ6; P55060; Q75432; Q32M40; Q9H5B7; Q9NTS0; Q9UP98; Q9UP99; Q9UPA0; B2R5T4                              | NP_001307                              | Exportin-2 (Exp2) (Importin alpha re-exporter) (Chromosome segregation 1-like protein) (Cellular apoptosis susceptibility protein)                                                                                                                                                             | GO:0006915; GO:0008283; GO:0005737; GO:0008262; GO:0005643; GO:0000059                                                                                                                                                                       | apoptosis; cell proliferation; cytoplasm; importin-alpha export receptor activity; nuclear pore; protein import into nucleus; docking                                                                                                                                                                                                                                                                                                                                                                                                                                         | Cytoplasm; Nucleus                                                                                 |          |                                       |                                       |                            |          |
| 1108 PKHL1   | PKHL1_HUMAN  | Q86W11; PKHL1                 | Q86W11; Q5P7P2; Q9U311; Q7L3Y6; NP_001034                                                                   | NP_803875                              | Fibrocystin-1 (Polycystic kidney and hepatic disease 1-like protein 1) (PKHD1-like protein 1)                                                                                                                                                                                                  | GO:0016021; GO:0004872                                                                                                                                                                                                                       | integral to membrane; receptor activity                                                                                                                                                                                                                                                                                                                                                                                                                                                                                                                                       | Membrane; Single-pass membrane protein                                                             |          |                                       |                                       |                            |          |
| 1109 UN45A   | UN45A_HUMAN  | UN45A; A8K6F7                 | Q9U311; Q7L3Y6; NP_001034; Q9U3U8; Q9NSE8; Q9NSE9; A8K6F7                                                   | NP_061141; NP_001034                   | Protein unc-45 homolog A (UNC-45A) (CCLUNC-45) (Smooth muscle cell-associated protein 1) (SMAP-1)                                                                                                                                                                                              | GO:0030154; GO:0005737; GO:0005874; GO:0005935; GO:0007519                                                                                                                                                                                   | cell differentiation; cytoplasm; nucleus; protein binding; skeletal muscle tissue development                                                                                                                                                                                                                                                                                                                                                                                                                                                                                 | Cytoplasm; Cytoplasmic region; Nucleus                                                             |          | Known in Uniprot to be phosphorylated |                                       |                            |          |
| 1110 PTPA    | PTPA_HUMAN   | PTPA; A91ZU4                  | Q57ZC2; Q15257; NP_821067; Q43241; Q15258; Q53G23; Q9BUK1; Q9NNZ7; Q9NNZ8; Q9NNZ9; A91ZU4                   | NP_066954; NP_821067; NP_821070 (PTPA) | Serine/threonine-protein phosphatase 2A (regulatory subunit B' (PP2A, subunit B', PR53 B40X form) (Phosphotyrosyl phosphatase activator)                                                                                                                                                       | GO:0005524; GO:0034704; GO:0032215; GO:0035308; GO:0005634; GO:0032216; GO:0033307; GO:0046982; GO:0042803; GO:0051721; GO:0001559; GO:0008601; GO:0008160; GO:0005102; GO:0005625                                                           | ATP binding; calcium channel complex; negative regulation of phosphoprotein phosphatase activity; negative regulation of protein amino acid phosphorylation; nucleus; positive regulation of phosphoprotein phosphatase activity; positive regulation of protein amino acid phosphorylation; protein heterodimerization activity; protein homodimerization activity; protein phosphatase 2A binding; protein phosphatase type 2A complex; protein phosphatase type 2A regulator activity; protein tyrosine phosphatase activator activity; receptor binding; soluble fraction |                                                                                                    |          |                                       |                                       | Phosphatase                |          |
| 1111 ZN490   | ZN490_HUMAN  | ZN490                         | Q9ULLM2                                                                                                     | NP_065765                              | Zinc finger protein 490                                                                                                                                                                                                                                                                        | GO:0003677; GO:0005634; GO:0006355; GO:0006629; GO:0005764                                                                                                                                                                                   | DNA binding; nucleus; regulation of transcription, DNA-dependent; zinc ion binding                                                                                                                                                                                                                                                                                                                                                                                                                                                                                            | Nucleus                                                                                            |          |                                       |                                       |                            |          |
| 1112 Q6W898  | Q6W898_HUMAN | Q6W898; A8K086                | Q6W898; A8K086                                                                                              | NP_004306; NP_808592                   | HSD-33                                                                                                                                                                                                                                                                                         | GO:0000139; GO:0017119; GO:0006891; GO:0005515; GO:0005215                                                                                                                                                                                   | Golgi membrane; Golgi transport complex; intra-Golgi vesicle-mediated transport; protein binding; transporter activity                                                                                                                                                                                                                                                                                                                                                                                                                                                        | Cytoplasm; Golgi apparatus; Golgi apparatus membrane; Peripheral membrane protein                  |          | Known in Uniprot to be phosphorylated |                                       |                            |          |
| 1113 GOGA3   | GOGA3_HUMAN  | GOGA3                         | Q86X78; Q43241; Q6P9C7; Q86XW3; Q8TDA9; Q8WZ43                                                              | NP_005886                              | Golgin subfamily A member 3 (Golgin-160) (Golgi complex-associated protein of 170 kDa) (GCP170)                                                                                                                                                                                                | GO:0000139; GO:0017119; GO:0006891; GO:0005515; GO:0005215                                                                                                                                                                                   | Golgi membrane; Golgi transport complex; intra-Golgi vesicle-mediated transport; protein binding; transporter activity                                                                                                                                                                                                                                                                                                                                                                                                                                                        | Cytoplasm; Golgi apparatus; Golgi apparatus membrane; Peripheral membrane protein                  |          | Known in Uniprot to be phosphorylated |                                       |                            |          |

| Protein Name | Uniprot Name | Other Names           | Uniprot Ids                                                                            | Refseq IDs           | Protein Description                                                                                                                                                                                                                                                                                         | GO ID                                                                                                                                                                                                                                          | GO terms                                                                                                                                                                                                                                                                                                                                                                                                                                                                                                                                                                                                             | Subcellular location                                                                                         | Comments | Comments                              | Comments - Database Search            | Comments - Database Search | Function |
|--------------|--------------|-----------------------|----------------------------------------------------------------------------------------|----------------------|-------------------------------------------------------------------------------------------------------------------------------------------------------------------------------------------------------------------------------------------------------------------------------------------------------------|------------------------------------------------------------------------------------------------------------------------------------------------------------------------------------------------------------------------------------------------|----------------------------------------------------------------------------------------------------------------------------------------------------------------------------------------------------------------------------------------------------------------------------------------------------------------------------------------------------------------------------------------------------------------------------------------------------------------------------------------------------------------------------------------------------------------------------------------------------------------------|--------------------------------------------------------------------------------------------------------------|----------|---------------------------------------|---------------------------------------|----------------------------|----------|
| 1114 EHD1    | EHD1_HUMAN   | EHD1; B2RSU3          | Q9HAM9; Q14611; Q2N3Q4; Q2N3K3; B2RSU3                                                 | NP_006786            | Eh domain-containing protein 1 (Testin) (HPAST1)                                                                                                                                                                                                                                                            | GO:000524; GO:000525; GO:0003924; GO:0005009; GO:0013101; GO:0005886; GO:0005515; GO:0005508                                                                                                                                                   | ATP binding; GTP binding; GTPase activity; calcium ion binding; early endosome membrane; plasma membrane; protein binding; recycling endosome membrane                                                                                                                                                                                                                                                                                                                                                                                                                                                               | CellmembranePeripheralmembraneproteinCytosolplasmicidEarlyendosome membraneHigh endosome membrane            |          |                                       | Known in Uniprot to be phosphorylated |                            |          |
| 1115 PSME2   | PSME2_HUMAN  | PSME2; Q6S27          | Q6S27; Q9UL46; Q15129                                                                  | NP_002809; NP_291768 | Proteasome activator complex subunit 2 (Proteasome activator 28 subunit beta) (PA28beta) (PA28b) (Activator of multicatalytic protease subunit 2) (11S regulator complex subunit beta) (REG-beta); Full-length cDNA clone C50D1015712 of T cells (Jurkat cell line) of Homo sapiens (human) (PSME2 protein) | GO:0031145; GO:0005829; GO:0001436; GO:0015137; GO:0008538; GO:0008537; GO:0008538                                                                                                                                                             | anaphase-promoting complex-dependent proteasomal ubiquitin-dependent protein catabolic process; cytosol; negative regulation of ubiquitin-protein ligase activity during mitotic cell cycle; positive regulation of ubiquitin-protein ligase activity during mitotic cell cycle; proteasome activator activity; proteasome activator complex; proteasome activator activity                                                                                                                                                                                                                                          |                                                                                                              |          |                                       |                                       |                            |          |
| 1116 ANO4    | ANO4_HUMAN   | Q8NB39; ANO4          | Q8NB39; Q32M45; Q8NA0; Q8NB53                                                          | XP_058577; NP_849148 | Anoctamin-4 (Transmembrane protein 16D)                                                                                                                                                                                                                                                                     | GO:0005509; GO:0005254; GO:0013104; GO:0016021; GO:0006811                                                                                                                                                                                     | calcium ion binding; chloride channel activity; chloride ion binding; integral to membrane; ion transport                                                                                                                                                                                                                                                                                                                                                                                                                                                                                                            | MembraneMultipassmembraneprotein                                                                             |          |                                       |                                       |                            |          |
| 1117 HDBP1   | HDBP1_HUMAN  | Q8IV16; HDBP1         | Q8IV16; Q67372; Q86W15                                                                 | NP_296036; NP_835466 | Glycosylphosphatidylinositol-anchored high density lipoprotein-binding protein 1 (GPI-anchored HDL-binding protein 1) (GPI-HBP1) (High density lipoprotein-binding protein 1)                                                                                                                               | GO:0034364; GO:0016021; GO:0008289                                                                                                                                                                                                             | high-density lipoprotein particle; integral to membrane; lipid binding                                                                                                                                                                                                                                                                                                                                                                                                                                                                                                                                               | CellmembraneHighdensity lipoprotein                                                                          |          |                                       |                                       |                            |          |
| 1118 FBXW8   | FBXW8_HUMAN  | FBXW8                 | Q8N3Y1; Q9UK95                                                                         | NP_699179; NP_036306 | F-box/WD repeat-containing protein 8 (F-box and WD-40 domain-containing protein 8) (F-box only protein 29)                                                                                                                                                                                                  | GO:0019941; GO:0005515                                                                                                                                                                                                                         | modification-dependent protein catabolic process; protein binding                                                                                                                                                                                                                                                                                                                                                                                                                                                                                                                                                    |                                                                                                              |          |                                       | Known in Uniprot to be phosphorylated |                            |          |
| 1119 CRNL1   | CRNL1_HUMAN  | CRNL1                 | Q9BZJ0; AK8974; Q31648; Q8WY15; Q9BZ19; Q9BZ11; Q9BZ12; Q9GZW7; Q9BFR1; Q9NQH5; Q9NYD8 | NP_057736            | Crooked neck-like protein 1 (Crooked neck homolog) (hCm)                                                                                                                                                                                                                                                    | GO:0003723; GO:0016007; GO:0005681; GO:0002045                                                                                                                                                                                                 | RNA binding; cytoplasm; nuclear speck; spliceosome; spliceosome assembly                                                                                                                                                                                                                                                                                                                                                                                                                                                                                                                                             | NucleussplicingCytoplasm                                                                                     |          |                                       |                                       |                            |          |
| 1120 FRDA    | FRDA_HUMAN   | FRDA; Q5V201          | Q14598; Q5V201; Q15545; Q95856; Q15294                                                 | NP_000135; NP_852090 | Frataxin, mitochondrial (Friedreich ataxia protein) (Fxn) (Cleaved into: Frataxin intermediate form; Frataxin[56-210]; Frataxin[81-210])                                                                                                                                                                    | GO:0005137; GO:0006879; GO:0008199; GO:0008198; GO:0006783; GO:0034986; GO:0018283; GO:0005759; GO:0030307; GO:0008284; GO:0051349; GO:0048554; GO:0005135; GO:0051347; GO:0016540; GO:0005515; GO:0010722; GO:0010039                         | 2 iron, 2 sulfur cluster binding; cellular iron ion homeostasis; cytosol; ferric iron binding; ferrous iron binding; heme biosynthetic process; iron chaperone activity; iron incorporation into metallo-sulfur cluster; mitochondrial matrix; positive regulation of cell growth; positive regulation of cell proliferation; positive regulation of lyase activity; positive regulation of metalloenzyme activity; positive regulation of oxidoreductase activity; positive regulation of transferase activity; protein autoprocessing; protein binding; regulation of ferredoxinase activity; response to iron ion | Mitochondrion                                                                                                |          |                                       |                                       |                            |          |
| 1121 FSIPI   | FSIPI_HUMAN  | Q86Y89; FSIPI         | Q86Y89; Q8NA03; Q8YK23                                                                 | XP_298422; NP_689810 | Fibrous sheath-interacting protein 1                                                                                                                                                                                                                                                                        | GO:0005525; GO:0051020; GO:0017124; GO:0005737; GO:0005524; GO:0005737; GO:0005634; GO:0005515; GO:0006457; GO:0006986; GO:0005829; GO:0006891; GO:0005737; GO:0005524; GO:0005634; GO:0005515; GO:0015031; GO:0006890; GO:0005198; GO:0030126 | GTP binding; GTPase binding; SH3 domain binding; cytoplasm; guanyl-nucleotide exchange factor activity                                                                                                                                                                                                                                                                                                                                                                                                                                                                                                               | Cytoplasm                                                                                                    |          |                                       | Known in Uniprot to be phosphorylated |                            |          |
| 1122 DOCK3   | DOCK3_HUMAN  | DOCK3                 | Q81ZD5; NP_004938                                                                      | XP_039259; NP_004938 | Dedicator of cytokinesis protein 3 (Modifier of cell adhesion) (Presenilin-binding protein) (PBP)                                                                                                                                                                                                           | GO:0005525; GO:0051020; GO:0017124; GO:0005737; GO:0005524; GO:0005634; GO:0005515; GO:0006457; GO:0006986; GO:0005829; GO:0006891; GO:0005737; GO:0005524; GO:0005634; GO:0005515; GO:0015031; GO:0006890; GO:0005198; GO:0030126             | GTP binding; GTPase binding; SH3 domain binding; cytoplasm; guanyl-nucleotide exchange factor activity                                                                                                                                                                                                                                                                                                                                                                                                                                                                                                               | Cytoplasm                                                                                                    |          |                                       | Known in Uniprot to be phosphorylated |                            |          |
| 1123 H574L   | H574L_HUMAN  | H574L; A2ICT2         | Q95757; Q4W5M5; Q81WA2; A2ICT2                                                         | NP_055093            | Heat shock 70 kDa protein 4L (Domestic stress protein 94) (Heat shock 70-related protein APG-1); Heat shock 70 kDa protein 4-like protein (Heat shock 70kDa protein 4-like, isoform CRA_b)                                                                                                                  | GO:0005524; GO:0005737; GO:0005634; GO:0005515; GO:0006457; GO:0006986; GO:0005829; GO:0006891; GO:0005737; GO:0005524; GO:0005634; GO:0005515; GO:0015031; GO:0006890; GO:0005198; GO:0030126                                                 | ATP binding; cytoplasm; nucleus; protein binding; protein folding; response to unfolded protein; response to stress                                                                                                                                                                                                                                                                                                                                                                                                                                                                                                  | CytoplasmNucleus;                                                                                            |          |                                       | Known in Uniprot to be phosphorylated |                            |          |
| 1124 COPE    | COPE_HUMAN   | COPE; Q6188B          | Q14579; Q6188B; Q7Z725                                                                 | NP_009194            | Coatomer subunit epsilon (Epsilon-coat protein) (Epsilon-COP); COPE protein (Coatomer protein complex, subunit epsilon, isoform CRA_1)                                                                                                                                                                      | GO:0005524; GO:0003126; GO:0005829; GO:0006891; GO:0005515; GO:0015031; GO:0006890; GO:0005198; GO:0030126                                                                                                                                     | COP1 coating of Golgi vesicle; COP1 vesicle-mediated transport; protein binding; protein transport; retrograde vesicle-mediated transport, Golgi to ER; structural molecule activity; COP1 vesicle coat                                                                                                                                                                                                                                                                                                                                                                                                              | CytoplasmGolgiapparatusmembranePeripheral membraneproteinCytosolplasmicidCytoplasmicvesicleCOP1coatedvesicle |          |                                       | Known in Uniprot to be phosphorylated |                            |          |
| 1125 ARPS    | ARPS_HUMAN   | ARPS                  | Q9H9F9; Q86WF7; Q81U15; Q8N724; Q9BRND; Q9BVB7; P36959; Q96HQ6                         | NP_079131            | Actin-related protein 5 (hARPS) (Sarcoma antigen NY-SAR-16)                                                                                                                                                                                                                                                 | GO:0005524; GO:0005515; GO:0006355                                                                                                                                                                                                             | ATP binding; protein binding; regulation of transcription, DNA-dependent                                                                                                                                                                                                                                                                                                                                                                                                                                                                                                                                             |                                                                                                              |          |                                       |                                       |                            |          |
| 1126 GMPRL1  | GMPRL1_HUMAN | GMPRL1                | Q96H06; Q96HQ6                                                                         | NP_006686            | GMP reductase 1 (EC 1.7.1.7) (Guanosine 5'-monophosphate oxidoreductase 1) (Guanosine monophosphate reductase 1)                                                                                                                                                                                            | GO:0003920; GO:0009117; GO:0005514; GO:0030955; GO:0009409                                                                                                                                                                                     | GMP reductase activity; nucleotide metabolic process; oxidation reduction; potassium ion binding; response to cold                                                                                                                                                                                                                                                                                                                                                                                                                                                                                                   |                                                                                                              |          |                                       |                                       |                            |          |
| 1127 PARK7   | PARK7_HUMAN  | PARK7; B2R421         | Q99497; Q14805; Q60R95; Q7LFU2; B2R421                                                 | NP_009193; NP_001116 | Protein DJ-1 (Oncogene DJ1) (Parkinson disease protein 7)                                                                                                                                                                                                                                                   | GO:0007265; GO:0005634; GO:0005515                                                                                                                                                                                                             | Ras protein signal transduction; nucleus; protein binding                                                                                                                                                                                                                                                                                                                                                                                                                                                                                                                                                            | NucleusCytoplasm                                                                                             |          |                                       | Known in Uniprot to be phosphorylated |                            |          |
| 1128 PGK2    | PGK2_HUMAN   | PGK2                  | Q52061; B2R68B; Q9H107                                                                 | NP_020061            | Phosphoglycerate kinase 2 (EC 2.7.2.3) (Phosphoglycerate kinase, testis specific)                                                                                                                                                                                                                           | GO:0005524; GO:0005829; GO:0006096; GO:0004618; GO:0006260; GO:0003887; GO:0005634; GO:0005515; GO:0043565                                                                                                                                     | ATP binding; cytosol; glycolysis; phosphoglycerate kinase activity; phosphorylation                                                                                                                                                                                                                                                                                                                                                                                                                                                                                                                                  | Cytoplasm                                                                                                    |          |                                       | Known in Uniprot to be phosphorylated | Kinase                     |          |
| 1129 DPOE3   | DPOE3_HUMAN  | DPOE3                 | Q9NRF9; Q5W0U1; Q8N758; Q8NCE5; Q8N832                                                 | NP_059139            | DNA polymerase epsilon subunit 3 (DNA polymerase II subunit 3) (EC 2.7.7.7) (DNA polymerase epsilon subunit p17) (Chromatin accessibility complex 17) (HuCHRAC17) (CHRAC-17) (Arsenic-transactivated protein) (ASTP)                                                                                        | GO:0046849; GO:0016020; GO:0005829; GO:0017048; GO:0003779; GO:0030036; GO:0042995; GO:0005737; GO:0005856; GO:0005886; GO:0005102; GO:0007005; GO:0005882                                                                                     | DNA replication; DNA-directed DNA polymerase activity; nucleus; protein binding; sequence-specific DNA binding                                                                                                                                                                                                                                                                                                                                                                                                                                                                                                       | Nucleus                                                                                                      |          |                                       | Known in Uniprot to be phosphorylated |                            |          |
| 1130 NPT2A   | NPT2A_HUMAN  | Q86VNE; NPT2A         | Q86VNE; Q86495; Q7Z725                                                                 | NP_003043            | Solute carrier family 34 (sodium phosphate), member 1                                                                                                                                                                                                                                                       | GO:0046849; GO:0016020; GO:0005829; GO:0017048; GO:0003779; GO:0030036; GO:0042995; GO:0005737; GO:0005856; GO:0005886; GO:0005102; GO:0007005; GO:0005882                                                                                     | bone remodeling; membrane; phosphate transport; sodium-dependent phosphate transport; sequence-specific DNA binding; Rho GTPase binding; actin binding; actin cytoskeleton organization; cell projection; cytoplasm; cytoskeleton; plasma membrane; receptor binding; sensory perception of sound; cellular component organization                                                                                                                                                                                                                                                                                   |                                                                                                              |          |                                       |                                       |                            |          |
| 1131 DIAP1   | DIAP1_HUMAN  | Q59F8B; Q17RN4; DIAP1 | Q59F8B; Q60610; Q17RN4; B7ZKW2; Q17RN4                                                 | NP_005210; NP_001073 | Protein diaphanous homolog 1 (Diaphanous-related formin-1) (DRF1); DIAPH1 protein 280                                                                                                                                                                                                                       | GO:0003779; GO:0005813; GO:0005615; GO:0005499; GO:0051180; GO:0005576                                                                                                                                                                         | actin binding; centrosome; extracellular space; vitamin D binding; vitamin transport; vitamin transporter activity                                                                                                                                                                                                                                                                                                                                                                                                                                                                                                   | CellmembraneCellproteintoplasmCytoplasm                                                                      |          |                                       | Known in Uniprot to be phosphorylated |                            |          |
| 1132 KR132   | KR132_HUMAN  | KR132                 | Q52LG2                                                                                 | XP_298663; NP_853652 | Keratin-associated protein 13-2                                                                                                                                                                                                                                                                             | GO:0007005; GO:0005882                                                                                                                                                                                                                         | intermediate filament                                                                                                                                                                                                                                                                                                                                                                                                                                                                                                                                                                                                |                                                                                                              |          |                                       |                                       |                            |          |
| 1133 PRDX2   | PRDX2_HUMAN  | PRDX2                 | P32119; P31945; P32118; P32701; Q6FHG4; Q92763; Q9UC23                                 | P32119; NP_003000    | Peroxisiredoxin-2 (EC 1.11.1.15) (Thioredoxin peroxidase 1) (Thioredoxin-dependent peroxide reductase 1) (Thiol-specific antioxidant protein) (TSA) (PRP) (Natural killer cell-enhancing factor B) (NKEF-B)                                                                                                 | GO:0006916; GO:0045454; GO:0005737; GO:0005514; GO:0006979; GO:0008379                                                                                                                                                                         | anti-apoptosis; cell redox homeostasis; cytoplasm; oxidation reduction; response to oxidative stress; thioredoxin peroxidase activity                                                                                                                                                                                                                                                                                                                                                                                                                                                                                | Cytoplasm                                                                                                    |          |                                       |                                       |                            |          |
| 1134 VTDB    | VTDB_HUMAN   | VTDB                  | P02774; Q13309; Q16310                                                                 | NP_000574            | Vitamin D-binding protein (DBP) (VDB) (Group-specific component) (Gc-globulin)                                                                                                                                                                                                                              | GO:0003779; GO:0005813; GO:0005615; GO:0005499; GO:0051180; GO:0005576                                                                                                                                                                         | actin binding; centrosome; extracellular space; vitamin D binding; vitamin transport; vitamin transporter activity                                                                                                                                                                                                                                                                                                                                                                                                                                                                                                   | Secreted                                                                                                     |          |                                       |                                       |                            |          |
| 1135 PDDC1   | PDDC1_HUMAN  | Q8NB37; PDDC1         | Q8NB37; Q2NL76; Q6ZV09; Q8NAED                                                         | XP_300550; NP_872418 | Parkinson disease 7 domain-containing protein 1                                                                                                                                                                                                                                                             | GO:0005100; GO:0004216; GO:0006919; GO:0005901; GO:0005737; GO:0005925; GO:0004041; GO:0030900; GO:0003007; GO:0021575; GO:0006917; GO:003024; GO:0030336; GO:0005499; GO:0001843; GO:000634; GO:0033307; GO:0008360                           | Rho GTPase activator activity; SH2 domain binding; activation of caspase activity; caveola; cytoplasm; focal adhesion; focal adhesion formation; forebrain development; heat morphogenesis; hindbrain morphogenesis; induction of apoptosis; negative regulation of Rho protein signal transduction; negative regulation of cell migration; negative regulation of cell proliferation; negative regulation of stress fiber formation; neural tube closure; nucleus; positive regulation of protein amino acid dephosphorylation; regulation of cell shape                                                            |                                                                                                              |          | Known in Uniprot to be phosphorylated | Known in HPRD to be phosphorylated    |                            |          |
| 1137 MACF1   | MACF1_HUMAN  | MACF1                 | Q91PN3; Q75053; Q9W202; Q8WY72; Q9H540; Q9UKR9; Q9ULG9                                 | NP_036222            | Microtubule-actin cross-linking factor 1, isoforms 1/2/3/5 (Actin cross-linking family protein 7) (Macrophilin-1) (Traubeculin-alpha) (620 kDa actin-binding protein) (ABPC20)                                                                                                                              | GO:0051015; GO:0005509; GO:0007050; GO:0005737; GO:0005856; GO:0008017                                                                                                                                                                         | actin filament binding; calcium ion binding; cell cycle arrest; cytoplasm; cytoskeleton; microtubule binding                                                                                                                                                                                                                                                                                                                                                                                                                                                                                                         | Cytoplasmcytoskeleton                                                                                        |          |                                       | Known in Uniprot to be phosphorylated |                            |          |

| Protein Name | Uniprot Name | Other Names                   | Uniprot                                                                                                                                                                                                                                                                                                                                                                                                                                                                                                                                                                                                                                                                                                                                                                                                                                                                                                                                                                                                                                                                                                                                                                                                                                                                                                                                                 | Refseq IDs                                                       | Protein Description                                                                                                                                                                                 | GO ID                                                                                                                                                                                                                                                                                                                                                                                                                                                                                                                                                                                                                                                                                                                                                                                                                                                                                                                                                                                                                                                                                                                                                                                                                                                                                                                                                                                                                                                                                                                                                                                                                                                                                                                                                                                                                                                                                                                                                                                                                                                                                                                                                                                                                                                                                                                                                                                                                                                                                                                                                                                                                                                                                                                                                                                                                                                                                                                                                                                                                                                                                                                                                                                                                                                                                                                                                                                                                                                                                                                                                                                                                                                                                                                                                                                                                                                                                                                                                                                                                                                                                                                                                                                                                                                                                                                                                                                                                                                                                                                                                                                                                                                                                                                                                                                                                                                                                                                                                                                                                                                                                                                                                                                                                                                                                                                                                                                                                                                                                                                                                                                                                                                                                                                                                                                                                                                                                                                                                                                                                                                                                                                                                                                                                                                                                                                                                                                                                                                                                                                                                                                                                                                                                                                                                                                                                                                                                                                                                                                                                                                                                                                                                                                                                                                                                                                                                                                                                                                                                                                                                                                                                                                                                                                                                                                                                                                                                                                                                                                                                                                                                                                                                                                                                                                                                                                                                                                                                                                                                                                                                                                                                                                                                                                                                                                                                                                                                                                                                                                                                                                                                                                                                                                                                                                                                                                                                                                                                                                                                                                                                                                                                                                                                                                                                                                                                                                                                                                                                                                                                                                                                                                                                                                                                                                                                                                                                                                                                                                                                                                                                                                                                                                                                                                                                                                                                                                                                                                                                                                                    | GO terms                                                                                                                                                                                                                                                                                                                                                                                                                           | Subcellular location                                                                | Comments | Comments - Database Search            | Comments - Database Search | Function |
|--------------|--------------|-------------------------------|---------------------------------------------------------------------------------------------------------------------------------------------------------------------------------------------------------------------------------------------------------------------------------------------------------------------------------------------------------------------------------------------------------------------------------------------------------------------------------------------------------------------------------------------------------------------------------------------------------------------------------------------------------------------------------------------------------------------------------------------------------------------------------------------------------------------------------------------------------------------------------------------------------------------------------------------------------------------------------------------------------------------------------------------------------------------------------------------------------------------------------------------------------------------------------------------------------------------------------------------------------------------------------------------------------------------------------------------------------|------------------------------------------------------------------|-----------------------------------------------------------------------------------------------------------------------------------------------------------------------------------------------------|----------------------------------------------------------------------------------------------------------------------------------------------------------------------------------------------------------------------------------------------------------------------------------------------------------------------------------------------------------------------------------------------------------------------------------------------------------------------------------------------------------------------------------------------------------------------------------------------------------------------------------------------------------------------------------------------------------------------------------------------------------------------------------------------------------------------------------------------------------------------------------------------------------------------------------------------------------------------------------------------------------------------------------------------------------------------------------------------------------------------------------------------------------------------------------------------------------------------------------------------------------------------------------------------------------------------------------------------------------------------------------------------------------------------------------------------------------------------------------------------------------------------------------------------------------------------------------------------------------------------------------------------------------------------------------------------------------------------------------------------------------------------------------------------------------------------------------------------------------------------------------------------------------------------------------------------------------------------------------------------------------------------------------------------------------------------------------------------------------------------------------------------------------------------------------------------------------------------------------------------------------------------------------------------------------------------------------------------------------------------------------------------------------------------------------------------------------------------------------------------------------------------------------------------------------------------------------------------------------------------------------------------------------------------------------------------------------------------------------------------------------------------------------------------------------------------------------------------------------------------------------------------------------------------------------------------------------------------------------------------------------------------------------------------------------------------------------------------------------------------------------------------------------------------------------------------------------------------------------------------------------------------------------------------------------------------------------------------------------------------------------------------------------------------------------------------------------------------------------------------------------------------------------------------------------------------------------------------------------------------------------------------------------------------------------------------------------------------------------------------------------------------------------------------------------------------------------------------------------------------------------------------------------------------------------------------------------------------------------------------------------------------------------------------------------------------------------------------------------------------------------------------------------------------------------------------------------------------------------------------------------------------------------------------------------------------------------------------------------------------------------------------------------------------------------------------------------------------------------------------------------------------------------------------------------------------------------------------------------------------------------------------------------------------------------------------------------------------------------------------------------------------------------------------------------------------------------------------------------------------------------------------------------------------------------------------------------------------------------------------------------------------------------------------------------------------------------------------------------------------------------------------------------------------------------------------------------------------------------------------------------------------------------------------------------------------------------------------------------------------------------------------------------------------------------------------------------------------------------------------------------------------------------------------------------------------------------------------------------------------------------------------------------------------------------------------------------------------------------------------------------------------------------------------------------------------------------------------------------------------------------------------------------------------------------------------------------------------------------------------------------------------------------------------------------------------------------------------------------------------------------------------------------------------------------------------------------------------------------------------------------------------------------------------------------------------------------------------------------------------------------------------------------------------------------------------------------------------------------------------------------------------------------------------------------------------------------------------------------------------------------------------------------------------------------------------------------------------------------------------------------------------------------------------------------------------------------------------------------------------------------------------------------------------------------------------------------------------------------------------------------------------------------------------------------------------------------------------------------------------------------------------------------------------------------------------------------------------------------------------------------------------------------------------------------------------------------------------------------------------------------------------------------------------------------------------------------------------------------------------------------------------------------------------------------------------------------------------------------------------------------------------------------------------------------------------------------------------------------------------------------------------------------------------------------------------------------------------------------------------------------------------------------------------------------------------------------------------------------------------------------------------------------------------------------------------------------------------------------------------------------------------------------------------------------------------------------------------------------------------------------------------------------------------------------------------------------------------------------------------------------------------------------------------------------------------------------------------------------------------------------------------------------------------------------------------------------------------------------------------------------------------------------------------------------------------------------------------------------------------------------------------------------------------------------------------------------------------------------------------------------------------------------------------------------------------------------------------------------------------------------------------------------------------------------------------------------------------------------------------------------------------------------------------------------------------------------------------------------------------------------------------------------------------------------------------------------------------------------------------------------------------------------------------------------------------------------------------------------------------------------------------------------------------------------------------------------------------------------------------------------------------------------------------------------------------------------------------------------------------------------------------------------------------------------------------------------------------------------------------------------------------------------------------------------------------------------------------------------------------------------------------------------------------------------------------------------------------------------------------------------------------------------------------------------------------------------------------------------------------------------------------------------------------------------------------------------------------------------------------------------------------------------------------------------------------------------------------------------------------------------------------------------------------------------------------------------------------------------------------------------------------------------------------------------------------------------------------------------------------------------------------------------------------------------------------------------------------------------------------------------------------------------------------------------------------------------------------------------------------------------|------------------------------------------------------------------------------------------------------------------------------------------------------------------------------------------------------------------------------------------------------------------------------------------------------------------------------------------------------------------------------------------------------------------------------------|-------------------------------------------------------------------------------------|----------|---------------------------------------|----------------------------|----------|
| 1138 MYO5B   | MYO5B_HUMAN  | MYO5B; Q8WVD2; B01176; Q8WVD2 | Q13459; Q75314; Q9NUJ2; Q9NHN0; B01176; Q8WVD2                                                                                                                                                                                                                                                                                                                                                                                                                                                                                                                                                                                                                                                                                                                                                                                                                                                                                                                                                                                                                                                                                                                                                                                                                                                                                                          | NP_004136                                                        | Myosin-IXb (Unconventional myosin-9b); MYO5B protein (Fragment)                                                                                                                                     | GO:0043531; GO:0005524; GO:0016887; GO:0005100; GO:0007266; GO:0003779; GO:0030048; GO:0005516; GO:0005938; GO:0019992; GO:0031941; GO:0003046; GO:0016459; GO:0048471; GO:0008270; GO:0005524; GO:0003086; GO:0005622; GO:0007242                                                                                                                                                                                                                                                                                                                                                                                                                                                                                                                                                                                                                                                                                                                                                                                                                                                                                                                                                                                                                                                                                                                                                                                                                                                                                                                                                                                                                                                                                                                                                                                                                                                                                                                                                                                                                                                                                                                                                                                                                                                                                                                                                                                                                                                                                                                                                                                                                                                                                                                                                                                                                                                                                                                                                                                                                                                                                                                                                                                                                                                                                                                                                                                                                                                                                                                                                                                                                                                                                                                                                                                                                                                                                                                                                                                                                                                                                                                                                                                                                                                                                                                                                                                                                                                                                                                                                                                                                                                                                                                                                                                                                                                                                                                                                                                                                                                                                                                                                                                                                                                                                                                                                                                                                                                                                                                                                                                                                                                                                                                                                                                                                                                                                                                                                                                                                                                                                                                                                                                                                                                                                                                                                                                                                                                                                                                                                                                                                                                                                                                                                                                                                                                                                                                                                                                                                                                                                                                                                                                                                                                                                                                                                                                                                                                                                                                                                                                                                                                                                                                                                                                                                                                                                                                                                                                                                                                                                                                                                                                                                                                                                                                                                                                                                                                                                                                                                                                                                                                                                                                                                                                                                                                                                                                                                                                                                                                                                                                                                                                                                                                                                                                                                                                                                                                                                                                                                                                                                                                                                                                                                                                                                                                                                                                                                                                                                                                                                                                                                                                                                                                                                                                                                                                                                                                                                                                                                                                                                                                                                                                                                                                                                                                                                                                                                                       | ADP binding; ATP binding; ATPase activity; Rho GTPase activator activity; Rho protein signal transduction; actin binding; actin filament-based movement; calmodulin binding; cell cortex; diacylglycerol binding; filamentous actin; microfilament motor activity; myosin complex; perinuclear region of cytoplasm; zinc ion binding; ATP binding; actin-dependent ATPase activity; intracellular; intracellular signaling cascade | Cytoplasm; cell cortex; cytoplasmic vesicle                                         |          | Known in Uniprot to be phosphorylated |                            |          |
| 1139 MCM10   | MCM10_HUMAN  | MCM10; B7ZK28                 | Q9H3P9; Q7L590; AKK916; Q3MR31; Q7LD55; Q9G5X4; Q96N86; Q9HD07; Q9I177; B7ZK28                                                                                                                                                                                                                                                                                                                                                                                                                                                                                                                                                                                                                                                                                                                                                                                                                                                                                                                                                                                                                                                                                                                                                                                                                                                                          | NP_069888; NP_877428                                             | Protein MCM10 homolog (HsMCM10)                                                                                                                                                                     | GO:0006260; GO:0005654; GO:0005515; GO:0008270                                                                                                                                                                                                                                                                                                                                                                                                                                                                                                                                                                                                                                                                                                                                                                                                                                                                                                                                                                                                                                                                                                                                                                                                                                                                                                                                                                                                                                                                                                                                                                                                                                                                                                                                                                                                                                                                                                                                                                                                                                                                                                                                                                                                                                                                                                                                                                                                                                                                                                                                                                                                                                                                                                                                                                                                                                                                                                                                                                                                                                                                                                                                                                                                                                                                                                                                                                                                                                                                                                                                                                                                                                                                                                                                                                                                                                                                                                                                                                                                                                                                                                                                                                                                                                                                                                                                                                                                                                                                                                                                                                                                                                                                                                                                                                                                                                                                                                                                                                                                                                                                                                                                                                                                                                                                                                                                                                                                                                                                                                                                                                                                                                                                                                                                                                                                                                                                                                                                                                                                                                                                                                                                                                                                                                                                                                                                                                                                                                                                                                                                                                                                                                                                                                                                                                                                                                                                                                                                                                                                                                                                                                                                                                                                                                                                                                                                                                                                                                                                                                                                                                                                                                                                                                                                                                                                                                                                                                                                                                                                                                                                                                                                                                                                                                                                                                                                                                                                                                                                                                                                                                                                                                                                                                                                                                                                                                                                                                                                                                                                                                                                                                                                                                                                                                                                                                                                                                                                                                                                                                                                                                                                                                                                                                                                                                                                                                                                                                                                                                                                                                                                                                                                                                                                                                                                                                                                                                                                                                                                                                                                                                                                                                                                                                                                                                                                                                                                                                                                                           | DNA replication; nucleoplasm; protein binding; zinc ion binding                                                                                                                                                                                                                                                                                                                                                                    | Nucleus                                                                             |          | Known in Uniprot to be phosphorylated |                            |          |
| 1140 ESTD    | ESTD_HUMAN   | ESTD                          | P10768; Q5T876; Q5T877; Q5T878; Q5T879; Q5T880; Q5T881; Q5T882                                                                                                                                                                                                                                                                                                                                                                                                                                                                                                                                                                                                                                                                                                                                                                                                                                                                                                                                                                                                                                                                                                                                                                                                                                                                                          | XP_166266; NP_001975                                             | S-formylglutathione hydrolase (FGH) (EC 3.1.2.12) (Esterase D)                                                                                                                                      | GO:0018738; GO:0004091; GO:0016023                                                                                                                                                                                                                                                                                                                                                                                                                                                                                                                                                                                                                                                                                                                                                                                                                                                                                                                                                                                                                                                                                                                                                                                                                                                                                                                                                                                                                                                                                                                                                                                                                                                                                                                                                                                                                                                                                                                                                                                                                                                                                                                                                                                                                                                                                                                                                                                                                                                                                                                                                                                                                                                                                                                                                                                                                                                                                                                                                                                                                                                                                                                                                                                                                                                                                                                                                                                                                                                                                                                                                                                                                                                                                                                                                                                                                                                                                                                                                                                                                                                                                                                                                                                                                                                                                                                                                                                                                                                                                                                                                                                                                                                                                                                                                                                                                                                                                                                                                                                                                                                                                                                                                                                                                                                                                                                                                                                                                                                                                                                                                                                                                                                                                                                                                                                                                                                                                                                                                                                                                                                                                                                                                                                                                                                                                                                                                                                                                                                                                                                                                                                                                                                                                                                                                                                                                                                                                                                                                                                                                                                                                                                                                                                                                                                                                                                                                                                                                                                                                                                                                                                                                                                                                                                                                                                                                                                                                                                                                                                                                                                                                                                                                                                                                                                                                                                                                                                                                                                                                                                                                                                                                                                                                                                                                                                                                                                                                                                                                                                                                                                                                                                                                                                                                                                                                                                                                                                                                                                                                                                                                                                                                                                                                                                                                                                                                                                                                                                                                                                                                                                                                                                                                                                                                                                                                                                                                                                                                                                                                                                                                                                                                                                                                                                                                                                                                                                                                                                                                                       | S-formylglutathione hydrolase activity; carbonylase activity; cytoplasmic membrane-bounded vesicle                                                                                                                                                                                                                                                                                                                                 | Cytoplasm; Cytoplasmic vesicle                                                      |          |                                       |                            |          |
| 1141 CS010   | CS010_HUMAN  | CS010                         | Q969H8; Q75256; Q75272; Q981C7; Q9N9P9                                                                                                                                                                                                                                                                                                                                                                                                                                                                                                                                                                                                                                                                                                                                                                                                                                                                                                                                                                                                                                                                                                                                                                                                                                                                                                                  | XP_035638; NP_061980                                             | UPF0556 protein C19orf10 (Stromal cell-derived growth factor SF20) (Interleukin-25) (IL-25)                                                                                                         | GO:0005793; GO:0005576                                                                                                                                                                                                                                                                                                                                                                                                                                                                                                                                                                                                                                                                                                                                                                                                                                                                                                                                                                                                                                                                                                                                                                                                                                                                                                                                                                                                                                                                                                                                                                                                                                                                                                                                                                                                                                                                                                                                                                                                                                                                                                                                                                                                                                                                                                                                                                                                                                                                                                                                                                                                                                                                                                                                                                                                                                                                                                                                                                                                                                                                                                                                                                                                                                                                                                                                                                                                                                                                                                                                                                                                                                                                                                                                                                                                                                                                                                                                                                                                                                                                                                                                                                                                                                                                                                                                                                                                                                                                                                                                                                                                                                                                                                                                                                                                                                                                                                                                                                                                                                                                                                                                                                                                                                                                                                                                                                                                                                                                                                                                                                                                                                                                                                                                                                                                                                                                                                                                                                                                                                                                                                                                                                                                                                                                                                                                                                                                                                                                                                                                                                                                                                                                                                                                                                                                                                                                                                                                                                                                                                                                                                                                                                                                                                                                                                                                                                                                                                                                                                                                                                                                                                                                                                                                                                                                                                                                                                                                                                                                                                                                                                                                                                                                                                                                                                                                                                                                                                                                                                                                                                                                                                                                                                                                                                                                                                                                                                                                                                                                                                                                                                                                                                                                                                                                                                                                                                                                                                                                                                                                                                                                                                                                                                                                                                                                                                                                                                                                                                                                                                                                                                                                                                                                                                                                                                                                                                                                                                                                                                                                                                                                                                                                                                                                                                                                                                                                                                                                                                                   | ER-Golgi intermediate compartment; extracellular region                                                                                                                                                                                                                                                                                                                                                                            | Secreted; Endoplasmic reticulum; Golgi intermediate compartment                     |          |                                       |                            |          |
| 1142 EGFLA   | EGFLA_HUMAN  | Q8N8N5; EGFLA                 | Q8N8N5; Q63H02; AKK607; Q5U643; Q6P3V1; Q8N124; Q8N197; Q8N7Y0; Q8N1A2                                                                                                                                                                                                                                                                                                                                                                                                                                                                                                                                                                                                                                                                                                                                                                                                                                                                                                                                                                                                                                                                                                                                                                                                                                                                                  | NP_689616; NP_877950; NP_877951; NP_877953                       | Pikachurin (EGF-like, fibronectin type-III and laminin G-like domain-containing protein)                                                                                                            | GO:0030054; GO:0005578; GO:0045202                                                                                                                                                                                                                                                                                                                                                                                                                                                                                                                                                                                                                                                                                                                                                                                                                                                                                                                                                                                                                                                                                                                                                                                                                                                                                                                                                                                                                                                                                                                                                                                                                                                                                                                                                                                                                                                                                                                                                                                                                                                                                                                                                                                                                                                                                                                                                                                                                                                                                                                                                                                                                                                                                                                                                                                                                                                                                                                                                                                                                                                                                                                                                                                                                                                                                                                                                                                                                                                                                                                                                                                                                                                                                                                                                                                                                                                                                                                                                                                                                                                                                                                                                                                                                                                                                                                                                                                                                                                                                                                                                                                                                                                                                                                                                                                                                                                                                                                                                                                                                                                                                                                                                                                                                                                                                                                                                                                                                                                                                                                                                                                                                                                                                                                                                                                                                                                                                                                                                                                                                                                                                                                                                                                                                                                                                                                                                                                                                                                                                                                                                                                                                                                                                                                                                                                                                                                                                                                                                                                                                                                                                                                                                                                                                                                                                                                                                                                                                                                                                                                                                                                                                                                                                                                                                                                                                                                                                                                                                                                                                                                                                                                                                                                                                                                                                                                                                                                                                                                                                                                                                                                                                                                                                                                                                                                                                                                                                                                                                                                                                                                                                                                                                                                                                                                                                                                                                                                                                                                                                                                                                                                                                                                                                                                                                                                                                                                                                                                                                                                                                                                                                                                                                                                                                                                                                                                                                                                                                                                                                                                                                                                                                                                                                                                                                                                                                                                                                                                                                                       | cell junction; proteinaceous extracellular matrix; synapse                                                                                                                                                                                                                                                                                                                                                                         | Secreted; extracellular space; extracellular matrix                                 |          |                                       |                            |          |
| 1143 SCFD1   | SCFD1_HUMAN  | SCFD1                         | Q8WVMB; AKK225; Q60754; Q94990; Q72529; Q8E131; Q9UNL3; Q9V6A8                                                                                                                                                                                                                                                                                                                                                                                                                                                                                                                                                                                                                                                                                                                                                                                                                                                                                                                                                                                                                                                                                                                                                                                                                                                                                          | NP_057190; NP_878255                                             | Sec1 family domain-containing protein 1 (Syntaxin-binding protein 1-like 2) (Slp1)                                                                                                                  | GO:0005794; GO:0005789; GO:0005934; GO:0015031; GO:0006904                                                                                                                                                                                                                                                                                                                                                                                                                                                                                                                                                                                                                                                                                                                                                                                                                                                                                                                                                                                                                                                                                                                                                                                                                                                                                                                                                                                                                                                                                                                                                                                                                                                                                                                                                                                                                                                                                                                                                                                                                                                                                                                                                                                                                                                                                                                                                                                                                                                                                                                                                                                                                                                                                                                                                                                                                                                                                                                                                                                                                                                                                                                                                                                                                                                                                                                                                                                                                                                                                                                                                                                                                                                                                                                                                                                                                                                                                                                                                                                                                                                                                                                                                                                                                                                                                                                                                                                                                                                                                                                                                                                                                                                                                                                                                                                                                                                                                                                                                                                                                                                                                                                                                                                                                                                                                                                                                                                                                                                                                                                                                                                                                                                                                                                                                                                                                                                                                                                                                                                                                                                                                                                                                                                                                                                                                                                                                                                                                                                                                                                                                                                                                                                                                                                                                                                                                                                                                                                                                                                                                                                                                                                                                                                                                                                                                                                                                                                                                                                                                                                                                                                                                                                                                                                                                                                                                                                                                                                                                                                                                                                                                                                                                                                                                                                                                                                                                                                                                                                                                                                                                                                                                                                                                                                                                                                                                                                                                                                                                                                                                                                                                                                                                                                                                                                                                                                                                                                                                                                                                                                                                                                                                                                                                                                                                                                                                                                                                                                                                                                                                                                                                                                                                                                                                                                                                                                                                                                                                                                                                                                                                                                                                                                                                                                                                                                                                                                                                                                                               | Golgi apparatus; endoplasmic reticulum membrane; nucleus; protein transport; vesicle docking during exocytosis                                                                                                                                                                                                                                                                                                                     | Cytoplasm; Endoplasmic reticulum; membrane; periplasmic membrane; protein transport |          | Known in Uniprot to be phosphorylated |                            |          |
| 1144 NID2    | NID2_HUMAN   | NID2; Q8V28                   | Q14112; Q43710; Q8V28                                                                                                                                                                                                                                                                                                                                                                                                                                                                                                                                                                                                                                                                                                                                                                                                                                                                                                                                                                                                                                                                                                                                                                                                                                                                                                                                   | NP_031387                                                        | Nidogen-2 (NID-2) (Osteonidogen); NID2 protein                                                                                                                                                      | GO:0005604; GO:0008218; GO:0005509; GO:0007160; GO:0005518; GO:0016020; GO:0018298; GO:0008218                                                                                                                                                                                                                                                                                                                                                                                                                                                                                                                                                                                                                                                                                                                                                                                                                                                                                                                                                                                                                                                                                                                                                                                                                                                                                                                                                                                                                                                                                                                                                                                                                                                                                                                                                                                                                                                                                                                                                                                                                                                                                                                                                                                                                                                                                                                                                                                                                                                                                                                                                                                                                                                                                                                                                                                                                                                                                                                                                                                                                                                                                                                                                                                                                                                                                                                                                                                                                                                                                                                                                                                                                                                                                                                                                                                                                                                                                                                                                                                                                                                                                                                                                                                                                                                                                                                                                                                                                                                                                                                                                                                                                                                                                                                                                                                                                                                                                                                                                                                                                                                                                                                                                                                                                                                                                                                                                                                                                                                                                                                                                                                                                                                                                                                                                                                                                                                                                                                                                                                                                                                                                                                                                                                                                                                                                                                                                                                                                                                                                                                                                                                                                                                                                                                                                                                                                                                                                                                                                                                                                                                                                                                                                                                                                                                                                                                                                                                                                                                                                                                                                                                                                                                                                                                                                                                                                                                                                                                                                                                                                                                                                                                                                                                                                                                                                                                                                                                                                                                                                                                                                                                                                                                                                                                                                                                                                                                                                                                                                                                                                                                                                                                                                                                                                                                                                                                                                                                                                                                                                                                                                                                                                                                                                                                                                                                                                                                                                                                                                                                                                                                                                                                                                                                                                                                                                                                                                                                                                                                                                                                                                                                                                                                                                                                                                                                                                                                                                                           | basement membrane; bioluminescence; calcium ion binding; cell-matrix adhesion; collagen binding; membrane; protein-chromosome linkage; bioluminescence                                                                                                                                                                                                                                                                             | Secreted; extracellular space; extracellular matrix; basement membrane              |          |                                       |                            |          |
| 1145 TRXR1   | TRXR1_HUMAN  | TRXR1                         | Q16881; Q8T811; Q8V840; Q8V841; Q8V842; Q8V843; Q8V844; Q8V845; Q8V846; Q8V847; Q8V848; Q8V849; Q8V850; Q8V851; Q8V852; Q8V853; Q8V854; Q8V855; Q8V856; Q8V857; Q8V858; Q8V859; Q8V860; Q8V861; Q8V862; Q8V863; Q8V864; Q8V865; Q8V866; Q8V867; Q8V868; Q8V869; Q8V870; Q8V871; Q8V872; Q8V873; Q8V874; Q8V875; Q8V876; Q8V877; Q8V878; Q8V879; Q8V880; Q8V881; Q8V882; Q8V883; Q8V884; Q8V885; Q8V886; Q8V887; Q8V888; Q8V889; Q8V890; Q8V891; Q8V892; Q8V893; Q8V894; Q8V895; Q8V896; Q8V897; Q8V898; Q8V899; Q8V900; Q8V901; Q8V902; Q8V903; Q8V904; Q8V905; Q8V906; Q8V907; Q8V908; Q8V909; Q8V910; Q8V911; Q8V912; Q8V913; Q8V914; Q8V915; Q8V916; Q8V917; Q8V918; Q8V919; Q8V920; Q8V921; Q8V922; Q8V923; Q8V924; Q8V925; Q8V926; Q8V927; Q8V928; Q8V929; Q8V930; Q8V931; Q8V932; Q8V933; Q8V934; Q8V935; Q8V936; Q8V937; Q8V938; Q8V939; Q8V940; Q8V941; Q8V942; Q8V943; Q8V944; Q8V945; Q8V946; Q8V947; Q8V948; Q8V949; Q8V950; Q8V951; Q8V952; Q8V953; Q8V954; Q8V955; Q8V956; Q8V957; Q8V958; Q8V959; Q8V960; Q8V961; Q8V962; Q8V963; Q8V964; Q8V965; Q8V966; Q8V967; Q8V968; Q8V969; Q8V970; Q8V971; Q8V972; Q8V973; Q8V974; Q8V975; Q8V976; Q8V977; Q8V978; Q8V979; Q8V980; Q8V981; Q8V982; Q8V983; Q8V984; Q8V985; Q8V986; Q8V987; Q8V988; Q8V989; Q8V990; Q8V991; Q8V992; Q8V993; Q8V994; Q8V995; Q8V996; Q8V997; Q8V998; Q8V999; Q8V1000 | NP_003321; NP_001067; NP_001068; NP_877393; NP_877419; NP_877420 | Thioredoxin reductase 1, cytoplasmic (TR) (EC 1.8.1.3) (Thioredoxin reductase TR1) (KM-102-derived reductase-like factor) (Gene associated with retinoid-IFN-induced mortality 12 protein) (GRM-12) | GO:0005660; GO:0005661; GO:0005662; GO:0005663; GO:0005664; GO:0005665; GO:0005666; GO:0005667; GO:0005668; GO:0005669; GO:0005670; GO:0005671; GO:0005672; GO:0005673; GO:0005674; GO:0005675; GO:0005676; GO:0005677; GO:0005678; GO:0005679; GO:0005680; GO:0005681; GO:0005682; GO:0005683; GO:0005684; GO:0005685; GO:0005686; GO:0005687; GO:0005688; GO:0005689; GO:0005690; GO:0005691; GO:0005692; GO:0005693; GO:0005694; GO:0005695; GO:0005696; GO:0005697; GO:0005698; GO:0005699; GO:0005700; GO:0005701; GO:0005702; GO:0005703; GO:0005704; GO:0005705; GO:0005706; GO:0005707; GO:0005708; GO:0005709; GO:0005710; GO:0005711; GO:0005712; GO:0005713; GO:0005714; GO:0005715; GO:0005716; GO:0005717; GO:0005718; GO:0005719; GO:0005720; GO:0005721; GO:0005722; GO:0005723; GO:0005724; GO:0005725; GO:0005726; GO:0005727; GO:0005728; GO:0005729; GO:0005730; GO:0005731; GO:0005732; GO:0005733; GO:0005734; GO:0005735; GO:0005736; GO:0005737; GO:0005738; GO:0005739; GO:0005740; GO:0005741; GO:0005742; GO:0005743; GO:0005744; GO:0005745; GO:0005746; GO:0005747; GO:0005748; GO:0005749; GO:0005750; GO:0005751; GO:0005752; GO:0005753; GO:0005754; GO:0005755; GO:0005756; GO:0005757; GO:0005758; GO:0005759; GO:0005760; GO:0005761; GO:0005762; GO:0005763; GO:0005764; GO:0005765; GO:0005766; GO:0005767; GO:0005768; GO:0005769; GO:0005770; GO:0005771; GO:0005772; GO:0005773; GO:0005774; GO:0005775; GO:0005776; GO:0005777; GO:0005778; GO:0005779; GO:0005780; GO:0005781; GO:0005782; GO:0005783; GO:0005784; GO:0005785; GO:0005786; GO:0005787; GO:0005788; GO:0005789; GO:0005790; GO:0005791; GO:0005792; GO:0005793; GO:0005794; GO:0005795; GO:0005796; GO:0005797; GO:0005798; GO:0005799; GO:0005800; GO:0005801; GO:0005802; GO:0005803; GO:0005804; GO:0005805; GO:0005806; GO:0005807; GO:0005808; GO:0005809; GO:0005810; GO:0005811; GO:0005812; GO:0005813; GO:0005814; GO:0005815; GO:0005816; GO:0005817; GO:0005818; GO:0005819; GO:0005820; GO:0005821; GO:0005822; GO:0005823; GO:0005824; GO:0005825; GO:0005826; GO:0005827; GO:0005828; GO:0005829; GO:0005830; GO:0005831; GO:0005832; GO:0005833; GO:0005834; GO:0005835; GO:0005836; GO:0005837; GO:0005838; GO:0005839; GO:0005840; GO:0005841; GO:0005842; GO:0005843; GO:0005844; GO:0005845; GO:0005846; GO:0005847; GO:0005848; GO:0005849; GO:0005850; GO:0005851; GO:0005852; GO:0005853; GO:0005854; GO:0005855; GO:0005856; GO:0005857; GO:0005858; GO:0005859; GO:0005860; GO:0005861; GO:0005862; GO:0005863; GO:0005864; GO:0005865; GO:0005866; GO:0005867; GO:0005868; GO:0005869; GO:0005870; GO:0005871; GO:0005872; GO:0005873; GO:0005874; GO:0005875; GO:0005876; GO:0005877; GO:0005878; GO:0005879; GO:0005880; GO:0005881; GO:0005882; GO:0005883; GO:0005884; GO:0005885; GO:0005886; GO:0005887; GO:0005888; GO:0005889; GO:0005890; GO:0005891; GO:0005892; GO:0005893; GO:0005894; GO:0005895; GO:0005896; GO:0005897; GO:0005898; GO:0005899; GO:0005900; GO:0005901; GO:0005902; GO:0005903; GO:0005904; GO:0005905; GO:0005906; GO:0005907; GO:0005908; GO:0005909; GO:0005910; GO:0005911; GO:0005912; GO:0005913; GO:0005914; GO:0005915; GO:0005916; GO:0005917; GO:0005918; GO:0005919; GO:0005920; GO:0005921; GO:0005922; GO:0005923; GO:0005924; GO:0005925; GO:0005926; GO:0005927; GO:0005928; GO:0005929; GO:0005930; GO:0005931; GO:0005932; GO:0005933; GO:0005934; GO:0005935; GO:0005936; GO:0005937; GO:0005938; GO:0005939; GO:0005940; GO:0005941; GO:0005942; GO:0005943; GO:0005944; GO:0005945; GO:0005946; GO:0005947; GO:0005948; GO:0005949; GO:0005950; GO:0005951; GO:0005952; GO:0005953; GO:0005954; GO:0005955; GO:0005956; GO:0005957; GO:0005958; GO:0005959; GO:0005960; GO:0005961; GO:0005962; GO:0005963; GO:0005964; GO:0005965; GO:0005966; GO:0005967; GO:0005968; GO:0005969; GO:0005970; GO:0005971; GO:0005972; GO:0005973; GO:0005974; GO:0005975; GO:0005976; GO:0005977; GO:0005978; GO:0005979; GO:0005980; GO:0005981; GO:0005982; GO:0005983; GO:0005984; GO:0005985; GO:0005986; GO:0005987; GO:0005988; GO:0005989; GO:0005990; GO:0005991; GO:0005992; GO:0005993; GO:0005994; GO:0005995; GO:0005996; GO:0005997; GO:0005998; GO:0005999; GO:0006000; GO:0006001; GO:0006002; GO:0006003; GO:0006004; GO:0006005; GO:0006006; GO:0006007; GO:0006008; GO:0006009; GO:0006010; GO:0006011; GO:0006012; GO:0006013; GO:0006014; GO:0006015; GO:0006016; GO:0006017; GO:0006018; GO:0006019; GO:0006020; GO:0006021; GO:0006022; GO:0006023; GO:0006024; GO:0006025; GO:0006026; GO:0006027; GO:0006028; GO:0006029; GO:0006030; GO:0006031; GO:0006032; GO:0006033; GO:0006034; GO:0006035; GO:0006036; GO:0006037; GO:0006038; GO:0006039; GO:0006040; GO:0006041; GO:0006042; GO:0006043; GO:0006044; GO:0006045; GO:0006046; GO:0006047; GO:0006048; GO:0006049; GO:0006050; GO:0006051; GO:0006052; GO:0006053; GO:0006054; GO:0006055; GO:0006056; GO:0006057; GO:0006058; GO:0006059; GO:0006060; GO:0006061; GO:0006062; GO:0006063; GO:0006064; GO:0006065; GO:0006066; GO:0006067; GO:0006068; GO:0006069; GO:0006070; GO:0006071; GO:0006072; GO:0006073; GO:0006074; GO:0006075; GO:0006076; GO:0006077; GO:0006078; GO:0006079; GO:0006080; GO:0006081; GO:0006082; GO:0006083; GO:0006084; GO:0006085; GO:0006086; GO:0006087; GO:0006088; GO:0006089; GO:0006090; GO:0006091; GO:0006092; GO:0006093; GO:0006094; GO:0006095; GO:0006096; GO:0006097; GO:0006098; GO:0006099; GO:0006100; GO:0006101; GO:0006102; GO:0006103; GO:0006104; GO:0006105; GO:0006106; GO:0006107; GO:0006108; GO:0006109; GO:0006110; GO:0006111; GO:0006112; GO:0006113; GO:0006114; GO:0006115; GO:0006116; GO:0006117; GO:0006118; GO:0006119; GO:0006120; GO:0006121; GO:0006122; GO:0006123; GO:0006124; GO:0006125; GO:0006126; GO:0006127; GO:0006128; GO:0006129; GO:0006130; GO:0006131; GO:0006132; GO:0006133; GO:0006134; GO:0006135; GO:0006136; GO:0006137; GO:0006138; GO:0006139; GO:0006140; GO:0006141; GO:0006142; GO:0006143; GO:0006144; GO:0006145; GO:0006146; GO:0006147; GO:0006148; GO:0006149; GO:0006150; GO:0006151; GO:0006152; GO:0006153; GO:0006154; GO:0006155; GO:0006156; GO:0006157; GO:0006158; GO:0006159; GO:0006160; GO:0006161; GO:0006162; GO:0006163; GO:0006164; GO:0006165; GO:0006166; GO:0006167; GO:0006168; GO:0006169; GO:0006170; GO:0006171; GO:0006172; GO:0006173; GO:0006174; GO:0006175; GO:0006176; GO:0006177; GO:0006178; GO:0006179; GO:0006180; GO:0006181; GO:0006182; GO:0006183; GO:0006184; GO:0006185; GO:0006186; GO:0006187; GO:0006188; GO:0006189; GO:0006190; GO:0006191; GO:0006192; GO:0006193; GO:0006194; GO:0006195; GO:0006196; GO:0006197; GO:0006198; GO:0006199; GO:0006200; GO:0006201; GO:0006202; GO:0006203; GO:0006204; GO:0006205; GO:0006206; GO:0006207; GO:0006208; GO:0006209; GO:0006210; GO:0006211; GO:0006212; GO:0006213; GO:0006214; GO:0006215; GO:0006216; GO:0006217; GO:0006218; GO:0006219; GO:0006220; GO:0006221; GO:0006222; GO:0006223; GO:0006224; GO:0006225; GO:0006226; GO:0006227; GO:0006228; GO:0006229; GO:0006230; GO:0006231; GO:0006232; GO:0006233; GO:0006234; GO:0006235; GO:0006236; GO:0006237; GO:0006238; GO:0006239; GO:0006240; GO:0006241; GO:0006242; GO:0006243; GO:0006244; GO:0006245; GO:0006246; GO:0006247; GO:0006248; GO:0006249; GO:0006250; GO:0006251; GO:0006252; GO:0006253; GO:0006254; GO:0006255; GO:0006256; GO:0006257; GO:0006258; GO:0006259; GO:0006260; GO:0006261; GO:0006262; GO:0006263; GO:0006264; GO:0006265; GO:0006266; GO:0006267; GO:0006268; GO:0006269; GO:0006270; GO:0006271; GO:0006272; GO:0006273; GO:0006274; GO:0006275; GO:0006276; GO:0006277; GO:0006278; GO:0006279; GO:0006280; GO:0006281; GO:0006282; GO:0006283; GO:0006284; GO:0006285; GO:0006286; GO:0006287; GO:0006288; GO:0006289; GO:0006290; GO:0006291; GO:0006292; GO:0006293; GO:0006294; GO:0006295; GO:0006296; GO:0006297; GO:0006298; GO:0006299; GO:0006300; GO:0006301; GO:0006302; GO:0006303; GO:0006304; GO:0006305; GO:0006306; GO:0006307; GO:0006308; GO:0006309; GO:0006310; GO:0006311; GO:0006312; GO:0006313; GO:0006314; GO:0006315; GO:0006316; GO:0006317; GO:0006318; GO:0006319; GO:0006320; GO:0006321; GO:0006322; GO:0006323; GO:0006324; GO:0006325; GO:0006326; GO:0006327; GO:0006328; GO:0006329; GO:0006330; GO:0006331; GO:0006332; GO:0006333; GO:0006334; GO:0006335; GO:0006336; GO:0006337; GO:0006338; GO:0006339; GO:0006340; GO:0006341; GO:0006342; GO:0006343; GO:0006344; GO:0006345; GO:0006346; GO:0006347; GO:0006348; GO:0006349; GO:0006350; GO:0006351; GO:0006352; GO:0006353; GO:0006354; GO:0006355; GO:0006356; GO:0006357; GO:0006358; GO:0006359; GO:0006360; GO:0006361; GO:0006362; GO:0006363; GO:0006364; GO:0006365; GO:0006366; GO:0006367; GO:0006368; GO:0006369; GO:0006370; GO:0006371; GO:0006372; GO:0006373; GO:0006374; GO:0006375; GO:0006376; GO:0006377; GO:0006378; GO:0006379; GO:0006380; GO:0006381; GO:0006382; GO:0006383; GO:0006384; GO:0006385; GO:0006386; GO:0006387; GO:0006388; GO:0006389; GO:0006390; GO:0006391; GO:0006392; GO:0006393; GO:0006394; GO:0006395; GO:0006396; GO:0006397; GO:0006398; GO:0006399; GO:0006400; GO:0006401; GO:0006402; GO:0006403; GO:0006404; GO:0006405; GO:0006406; GO:0006407; GO:0006408; GO:0006409; GO:0006410; GO:0006411; GO:0006412; GO:0006413; GO:0006414; GO:0006415; GO:0006416; GO:0006417; GO:0006418; GO:0006419; GO:0006420; GO:0006421; GO:0006422; GO:0006423; GO:0006424; GO:0006425; GO:0006426; GO:0006427; GO:0006428; GO:0006429; GO:0006430; GO:0006431; GO:0006432; GO:0006433; GO:0006434; GO:0006435; GO:0006436; GO:0006437; GO:0006438; GO:0006439; GO:0006440; GO:0006441; GO:0006442; GO:0006443; GO:0006444; GO:0006445; GO:0006446; GO:0006447; GO:0006448; GO:0006449; GO:0006450; GO:0006451; GO:0006452; GO:0006453; GO:0006454; GO:0006455; GO:0006456; GO:0006457; GO:0006458; GO:0006459; GO:0006460; GO:0006461; GO:0006462; GO:0006463; GO:0006464; GO:0006465; GO:0006466; GO:0006467; GO:0006468; GO:0006469; GO:0006470; GO:0006471; GO:0006472; GO:0006473; GO:0006474; GO:0006475; GO:0006476; GO:0006477; GO:0006478; GO:0006479; GO:0006480; GO:0006481; GO:0006482; GO:0006483; GO:0006484; GO:0006485; GO:0006486; GO:0006487; GO:0006488; GO:0006489; GO:0006490; GO:0006491; GO:0006492; GO:0006493; GO:0006494; GO:0006495; GO:0006496; GO:0006497; GO:0006498; GO:0006499; GO:0006500; GO:0006501; GO:0006502; GO:0006503; GO:0006504; GO:0006505; GO:0006506; GO:0006507; GO:0006508; GO:0006509; GO:0006510; GO:0006511; GO:0006512; GO:0006513; GO:0006514; GO:0006515; GO:0006516; GO:0006517; GO:0006518; GO:0006519; GO:0006520; GO:0006521; GO:0006522; GO:0006523; GO:0006524; GO:0006525; GO:0006526; GO:0006527; GO:0006528; GO:0006529; GO:0006530; GO:0006531; GO:0006532; GO:0006533; GO:0006534; GO:0006535; GO:0006536; GO:0006537; GO:0006538; GO:0006539; GO:00065 |                                                                                                                                                                                                                                                                                                                                                                                                                                    |                                                                                     |          |                                       |                            |          |

| Protein Name | Uniprot Name | Other Names | Uniprot               | Refseq IDs                                                            | Protein Description   | GO ID                                                                                                                                                                                                                                              | GO terms                                                                                                                                                                                                                                                   | Subcellular location                                                                                                                                                                                                                                                                                                                                                                                                                                                                                                                                                                                                                                 | Comments                                                                                  | Comments - Database Search | Comments - Database Search            | Function                           |
|--------------|--------------|-------------|-----------------------|-----------------------------------------------------------------------|-----------------------|----------------------------------------------------------------------------------------------------------------------------------------------------------------------------------------------------------------------------------------------------|------------------------------------------------------------------------------------------------------------------------------------------------------------------------------------------------------------------------------------------------------------|------------------------------------------------------------------------------------------------------------------------------------------------------------------------------------------------------------------------------------------------------------------------------------------------------------------------------------------------------------------------------------------------------------------------------------------------------------------------------------------------------------------------------------------------------------------------------------------------------------------------------------------------------|-------------------------------------------------------------------------------------------|----------------------------|---------------------------------------|------------------------------------|
| 1159         | UB21         | UB21_HUMAN  | UB21                  | Q9Y785; AK3F9; Q5WNN4; Q95232; Q9NQL3; Q9N166; Q9P011; Q9P050; Q9JF10 | NP_057105             | Ubiquitin-conjugating enzyme E2 11 (EC 6.3.3.19) (Non-canonical ubiquitin-conjugating enzyme 1) (NCUBE1) (Yeast ubiquitin-conjugating enzyme Ubc5 homolog E) (HUBC5E)                                                                              | GO:0005789; GO:0016021; GO:0019941; GO:0043687; GO:0051246; GO:0004842                                                                                                                                                                                     | endoplasmic reticulum membrane; integral to membrane; modification-dependent protein catabolic process; post-translational protein modification; regulation of protein metabolic process; ubiquitin-protein ligase activity                                                                                                                                                                                                                                                                                                                                                                                                                          | Endoplasmic reticulum membrane; Singlepassytmembrane protein                              |                            | Known in Uniprot to be phosphorylated |                                    |
| 1160         | SATB2        | SATB2_HUMAN | SATB2; ABKS28         | Q9LWP6; Q4V763; ABKS28                                                | XP_031223; NP_056080  | DNA-binding protein SATB2 (Special AT-rich sequence-binding protein 2)                                                                                                                                                                             | GO:0005634; GO:0043365; GO:0003700                                                                                                                                                                                                                         | nucleus; regulation of transcription, DNA-dependent; sequence-specific DNA binding; transcription factor activity                                                                                                                                                                                                                                                                                                                                                                                                                                                                                                                                    | Nucleus                                                                                   |                            | Known in Uniprot to be phosphorylated |                                    |
| 1161         | RHO          | RHO_HUMAN   | RHO                   | Q9BHD0; Q8WV81; Q9XW6                                                 | NP_061907             | Rho-related GTP-binding protein RhoF (Rho family GTPase Rf) (Rho in filopodia)                                                                                                                                                                     | GO:0005225; GO:0003924; GO:0007015; GO:0005737; GO:0005856; GO:0005886; GO:0019782; GO:0013200; GO:0016874; GO:0005794; GO:0010054; GO:0019992; GO:0007598; GO:0005917; GO:0007242; GO:0004872; GO:0045202; GO:0008270; GO:0016082                         | GTP binding; GTPase activity; actin filament organization; cytoplasm; cytoskeleton; plasma membrane; small GTPase mediated signal transduction                                                                                                                                                                                                                                                                                                                                                                                                                                                                                                       | Cellmembrane; Lipidanchor; Cytoplasm; side; Cytoskeleton                                  |                            | Known in Uniprot to be phosphorylated |                                    |
| 1162         | UBA7         | UBA7_HUMAN  | Q9BR82; UBA7          | Q9BR82; P41226                                                        | NP_003326             | Ubiquitin-like modifier-activating enzyme 7 (Ubiquitin-activating enzyme E1 homolog) (UB)                                                                                                                                                          | GO:0005224; GO:0019782; GO:0013200; GO:0016874; GO:0005794; GO:0010054; GO:0019992; GO:0007598; GO:0005917; GO:0007242; GO:0004872; GO:0045202; GO:0008270; GO:0016082                                                                                     | ATP binding; ISG15 activating enzyme activity; ISG15-protein conjugation; ligase activity; modification-dependent protein catabolic process                                                                                                                                                                                                                                                                                                                                                                                                                                                                                                          |                                                                                           |                            | Known in Uniprot to be phosphorylated | Known in HPRD to be phosphorylated |
| 1163         | UN138        | UN138_HUMAN | UN138; Q4LE73; Q5VY68 | Q4LE73; Q5VY68                                                        | NP_006368             | Protein unc-13 homolog B (Munc13-2) (munc13); UNC13B variant protein (Fragment)                                                                                                                                                                    | GO:0005794; GO:0010054; GO:0019992; GO:0007598; GO:0005917; GO:0007242; GO:0004872; GO:0045202; GO:0008270; GO:0016082                                                                                                                                     | Golgi apparatus; cell junction; diacylglycerol binding; excretion; induction of apoptosis; intracellular signaling cascade; receptor activity; synapse; zinc ion binding; diacylglycerol binding; synaptic vesicle priming                                                                                                                                                                                                                                                                                                                                                                                                                           | Cytoplasm; Membrane; Plasmalemma; Membrane protein; Cytoplasmic vesicle; Synapse; Nucleus |                            | Known in Uniprot to be phosphorylated | Known in HPRD to be phosphorylated |
| 1164         | RAF2B        | RAF2B_HUMAN | RAF2B; Q5JQ44         | P61225; P17964; Q96G55; Q9CXC0; Q5JQ44                                | NP_002877             | Ras-related protein Rap-2b; Putative uncharacterized protein DKFZp547A0616 (Fragment)                                                                                                                                                              | GO:0005225; GO:0005622; GO:0003886; GO:0007264; GO:0019904                                                                                                                                                                                                 | GTP binding; intracellular; plasma membrane; small GTPase mediated signal transduction; protein domain specific binding                                                                                                                                                                                                                                                                                                                                                                                                                                                                                                                              | Cellmembrane; Lipidanchor; Cytoplasm; side; Cytoskeleton                                  |                            | Known in Uniprot to be phosphorylated |                                    |
| 1165         | ELAV1        | ELAV1_HUMAN | ELAV1; Q5XN6          | Q5XN6; Q98T11                                                         | NP_001410             | ELAV-like protein 1 (Hu-antigen R) (HuR); ELAV (Embryonic lethal, abnormal vision, Drosophila)-like 1 (Hu antigen R) (ELAV) (Embryonic lethal, abnormal vision, Drosophila)-like 1 (Hu antigen R), isoform CRA_a                                   | GO:0042802; GO:0003729; GO:0007275; GO:0000156; GO:0048255; GO:0008131; GO:0009055; GO:0016021; GO:0003166; GO:0051144; GO:0009055; GO:0005743; GO:0016491                                                                                                 | identical protein binding; mRNA binding; multicellular organismal development; nucleotide binding; RNA binding; mRNA stabilization; nucleus                                                                                                                                                                                                                                                                                                                                                                                                                                                                                                          |                                                                                           |                            | Known in Uniprot to be phosphorylated |                                    |
| 1166         | AOFB         | AOFB_HUMAN  | AOFB; Q8T811; B2R6R3  | R27338; Q72552; B2R6R3; Q8T811                                        | NP_000889             | Amine oxidase (flavin-containing) B (EC 1.4.3.4) (Monoamine oxidase type B) (MAO-B); Monoamine oxidase B                                                                                                                                           | GO:0008131; GO:0009055; GO:0016021; GO:0003166; GO:0051144; GO:0009055; GO:0005743; GO:0016491                                                                                                                                                             | amine oxidase activity; electron carrier activity; integral to membrane; mitochondrial outer membrane; oxidation reduction; electron carrier activity; mitochondrial inner membrane; oxidoreductase activity                                                                                                                                                                                                                                                                                                                                                                                                                                         | Mitochondrion; outer membrane; Singlepassytmembrane protein; Cytoplasmic vesicle          |                            | Known in Uniprot to be phosphorylated |                                    |
| 1167         | SYTC         | SYTC_HUMAN  | SYTC; ABK811          | P26639; Q96FP5; Q98W66; ABK811                                        | NP_003182; NP_689508  | Threonyl-tRNA synthetase, cytoplasmic (EC 6.1.1.3) (Threonine-tRNA ligase) (ThRS)                                                                                                                                                                  | GO:0005224; GO:0005737; GO:0042803; GO:0004262; GO:0044259; GO:0004108; GO:0005759                                                                                                                                                                         | ATP binding; cytoplasm; protein homodimerization activity; threonine-tRNA ligase activity; threonyl-tRNA aminoacylation                                                                                                                                                                                                                                                                                                                                                                                                                                                                                                                              | Cytoplasm                                                                                 |                            | Known in Uniprot to be phosphorylated |                                    |
| 1168         | CISY         | CISY_HUMAN  | CISY                  | Q75390; Q7LUT9; Q7KZM0; Q96FZ8; Q98WN8; Q8N7V5                        | NP_004068             | Citrate synthase, mitochondrial (EC 2.3.3.1)                                                                                                                                                                                                       | GO:0006435; GO:0004108; GO:0006099                                                                                                                                                                                                                         | cellular carbohydrate metabolic process; citrate (5S)-synthase activity; mitochondrial matrix; tricarboxylic acid cycle                                                                                                                                                                                                                                                                                                                                                                                                                                                                                                                              | Mitochondrion; matrix                                                                     |                            | Known in Uniprot to be phosphorylated |                                    |
| 1169         | PRR20        | PRR20_HUMAN | Q8N7V5; PRR20         | Q8N7V5                                                                | XP_297707; NP_0011238 | Proline-rich protein 20                                                                                                                                                                                                                            | NP_0011238; Q71713; NP_0011238; Q877; NP_0011238; Q78; NP_0011238; Q79; NP_940843                                                                                                                                                                          |                                                                                                                                                                                                                                                                                                                                                                                                                                                                                                                                                                                                                                                      |                                                                                           |                            |                                       |                                    |
| 1170         | BASI         | BASI_HUMAN  | BASI                  | P35613; Q72796; Q8ZLZ7                                                | NP_001719; NP_940991  | Basigin (Leukocyte activation antigen M6) (Collagenase stimulatory factor) (Extracellular matrix metalloproteinase inducer) (EMMPRIN) (SF7) (Tumor cell-derived collagenase stimulatory factor) (TCSF) (OK blood group antigen) (CD antigen CD147) | GO:0000139; GO:0003166; GO:0016021; GO:0005537; GO:0042470; GO:0005886; GO:0005515                                                                                                                                                                         | Golgi membrane; cell surface receptor linked signal transduction; integral to membrane; mannose binding; melanosome; plasma membrane; protein binding                                                                                                                                                                                                                                                                                                                                                                                                                                                                                                | Cellmembrane; Singlepassytmembrane protein; InMelanosome                                  |                            | Known in Uniprot to be phosphorylated |                                    |
| 1171         | TCPD         | TCPD_HUMAN  | TCPD                  | Q50991; Q51099; B2R6I3; Q14870; Q96C51                                | NP_006421             | T-complex protein 1 subunit delta (TCP-1-delta) (CC-1-delta) (Stimulator of TAR-RNA-binding)                                                                                                                                                       | GO:0005224; GO:0042470; GO:0006457; GO:0051082                                                                                                                                                                                                             | ATP binding; melanosome; protein folding; unfolded protein binding                                                                                                                                                                                                                                                                                                                                                                                                                                                                                                                                                                                   | Cytoplasm; Melanosome                                                                     |                            | Known in Uniprot to be phosphorylated |                                    |
| 1172         | CV025        | CV025_HUMAN | CV025                 | Q81W05; Q6LCL3; Q8NAL0; Q8TCS0; Q98416                                | NP_690870             | Uncharacterized protein C2orf25                                                                                                                                                                                                                    |                                                                                                                                                                                                                                                            |                                                                                                                                                                                                                                                                                                                                                                                                                                                                                                                                                                                                                                                      |                                                                                           |                            |                                       |                                    |
| 1173         | F111A        | F111A_HUMAN | F111A                 | Q68DK9; Q98P22; ABK5Y8; Q5RKS9; NP_0011359; Q5XKM2; Q619R7; Q9H5Y1    | NP_071357; NP_001135  | Protein FAM111A                                                                                                                                                                                                                                    | GO:0003824                                                                                                                                                                                                                                                 | catalytic activity                                                                                                                                                                                                                                                                                                                                                                                                                                                                                                                                                                                                                                   |                                                                                           |                            |                                       |                                    |
| 1174         | ACLY         | ACLY_HUMAN  | ACLY                  | P53396; Q13037; Q98RL0                                                | NP_942144; NP_942127  | ATP-citrate synthase (EC 2.3.3.8) (ATP-citrate (pro-5S)-lyase) (Citrate cleavage enzyme)                                                                                                                                                           | GO:0005224; GO:0006200; GO:0003878; GO:0044262; GO:0008815; GO:0009346; GO:0006101; GO:0019336; GO:0005829; GO:0008610; GO:000287; GO:0005515; GO:0003677; GO:0005634; GO:0006355; GO:0008270                                                              | ATP binding; ATP catabolic process; ATP citrate synthase activity; cellular carbohydrate metabolic process; citrate (pro-5S)-lyase activity; citrate lyase complex; citrate metabolic process; coenzyme A metabolic process; cytosol; lipid biosynthetic process; magnesium ion binding; protein binding; succinate-CoA ligase (ADP-forming) activity                                                                                                                                                                                                                                                                                                | Cytoplasm                                                                                 |                            | Known in Uniprot to be phosphorylated | Known in HPRD to be phosphorylated |
| 1175         | ZN792        | ZN792_HUMAN | Q8N932; Q495L3; ZN792 | Q495L3; Q8N932; Q1KQV3; B4E333; Q495L3                                | NP_787068             | Zinc finger protein 792                                                                                                                                                                                                                            | GO:0005515; GO:0004775; GO:0003677; GO:0005634; GO:0006355; GO:0008270                                                                                                                                                                                     | DNA binding; nucleus; regulation of transcription, DNA-dependent; zinc ion binding                                                                                                                                                                                                                                                                                                                                                                                                                                                                                                                                                                   | Nucleus                                                                                   |                            |                                       |                                    |
| 1176         | P1N4         | P1N4_HUMAN  | P1N4                  | Q495L3; Q9HYW6                                                        | NP_006214             | Peptidyl-prolyl cis-trans isomerase NIMA-interacting 4 (EC 5.2.1.8) (Rotamase Pin4) (PPIase Pin4) (Parvulin 14) (Par14) (Peptidyl-prolyl cis/trans isomerase CPV1)                                                                                 | GO:0005759; GO:0003755; GO:0006457                                                                                                                                                                                                                         | mitochondrial matrix; peptidyl-prolyl cis-trans isomerase activity; protein folding                                                                                                                                                                                                                                                                                                                                                                                                                                                                                                                                                                  |                                                                                           |                            | Known in HPRD to be phosphorylated    |                                    |
| 1177         | SNX25        | SNX25_HUMAN | SNX25; Q3ZT30; B3K1T8 | Q3ZT30; Q9H3E2; B3K1T8                                                | NP_114159             | Sorting nexin-25                                                                                                                                                                                                                                   | GO:0007154; GO:0035091; GO:0009512; GO:0015031; GO:0006916; GO:0005829; GO:0043154; GO:0005515; GO:0009615; GO:0019079                                                                                                                                     | cell communication; phosphoinositide binding; protein binding; protein transport; signal transducer activity                                                                                                                                                                                                                                                                                                                                                                                                                                                                                                                                         |                                                                                           |                            | Known in Uniprot to be phosphorylated |                                    |
| 1178         | XIP          | XIP_HUMAN   | XIP; HBXIP            | Q43504; Q6IBD8                                                        | NP_006393             | Hesatitis B virus X-interacting protein (HBX-interacting protein) (HBX X-interacting protein)                                                                                                                                                      | GO:0005224; GO:0005829; GO:0043154; GO:0005515; GO:0009615; GO:0019079                                                                                                                                                                                     | anti-apoptosis; cytosol; negative regulation of caspase activity; protein binding; response to virus; viral genome replication                                                                                                                                                                                                                                                                                                                                                                                                                                                                                                                       | Cytoplasm                                                                                 |                            | Known in Uniprot to be phosphorylated |                                    |
| 1179         | TMED9        | TMED9_HUMAN | TMED9                 | Q98VK6; Q14437; Q8WZ61                                                | NP_039980             | Transmembrane emp24 domain-containing protein 9 (Glycoprotein 29L2)                                                                                                                                                                                | GO:0005793; GO:0005789; GO:0016021; GO:0006810                                                                                                                                                                                                             | ER-Golgi intermediate compartment; endoplasmic reticulum membrane; integral to membrane; transport                                                                                                                                                                                                                                                                                                                                                                                                                                                                                                                                                   | Endoplasmic reticulum membrane; Singlepassytmembrane protein                              |                            |                                       |                                    |
| 1180         | 6PDG         | 6PDG_HUMAN  | 6PDG; Q4VXW6; A9Z1X1  | P52209; Q4VXW6; Q98WD8; A9Z1X1                                        | NP_002622             | 6-phosphogluconate dehydrogenase, decarboxylating (EC 1.1.1.44)                                                                                                                                                                                    | GO:0005661; GO:0005114; GO:0009051; GO:0004616; GO:0005515                                                                                                                                                                                                 | NADP or NADPH binding; oxidation reduction; pentose-phosphate shunt; oxidative branch; phosphogluconate dehydrogenase (decarboxylating) activity; protein binding                                                                                                                                                                                                                                                                                                                                                                                                                                                                                    |                                                                                           |                            |                                       |                                    |
| 1181         | CK063        | CK063_HUMAN | CK063; ABK6G0; B3KUM2 | Q6NUN7; Q96G55; Q915D5; ABK6G0; B3KUM2                                | NP_079082; NP_954575  | Uncharacterized protein C11orf63                                                                                                                                                                                                                   |                                                                                                                                                                                                                                                            |                                                                                                                                                                                                                                                                                                                                                                                                                                                                                                                                                                                                                                                      |                                                                                           |                            |                                       |                                    |
| 1182         | US20         | US20_HUMAN  | US20; Q8N8E6          | Q75643; Q94884; Q6AZY0; Q6Q939; Q8N8E6; Q98FZ2; Q9H750                | NP_054733             | US small nuclear ribonucleoprotein 200 kDa helicase (EC 3.6.1.-) (US snRNP-specific 200 kDa protein) (US-200kD) (Activating signal corepressor 1 complex subunit 3-like 1) (BRR2 homolog)                                                          | GO:0005524; GO:0008026; GO:0000254; GO:0003676; GO:0005515; GO:0005682                                                                                                                                                                                     | ATP binding; ATP-dependent helicase activity; cis assembly of pre-catalytic spliceosome; nucleic acid binding; protein binding; snRNP US                                                                                                                                                                                                                                                                                                                                                                                                                                                                                                             | Nucleus                                                                                   |                            | Known in Uniprot to be phosphorylated | Known in HPRD to be phosphorylated |
| 1183         | GNAQ         | GNAQ_HUMAN  | GNAQ; Q6NT27          | Q6NT27; P50148; Q15108; Q13462; Q92471; Q98Z89                        | NP_002063             | Guanine nucleotide-binding protein G(q) subunit alpha (Guanine nucleotide-binding protein alpha-q); Guanine nucleotide binding protein (G protein), q polypeptide (Guanine nucleotide binding protein (G protein), q polypeptide, isoform CRA_c)   | GO:0005525; GO:0003924; GO:0007596; GO:0005737; GO:0005886; GO:0006471; GO:0004871; GO:0007186; GO:0005525; GO:0007189; GO:0006158; GO:0007610; GO:0042733; GO:0021884; GO:0007215; GO:0007507; GO:0016322; GO:0009791; GO:0001508; GO:0045634; GO:0001501 | GTP binding; GTPase activity; blood coagulation; cytoplasm; plasma membrane; protein amino acid ADP-ribosylation; signal transducer activity; G-protein coupled receptor protein signaling pathway; GTP binding; activation of adenylyl cyclase activity by G-protein; signaling pathway; activation of phospholipase C activity by dopamine receptor signaling pathway; behavior; embryonic digit morphogenesis; forebrain neuron development; glutamate signaling pathway; heart development; neuron remodeling; post-embryonic development; regulation of action potential; regulation of melanocyte differentiation; skeletal system development |                                                                                           |                            |                                       |                                    |
| 1184         | OTU68        | OTU68_HUMAN | OTU68                 | Q8N6M0; ABK6I1; Q8NTA4; Q9Y387                                        | NP_057107             | OTU domain-containing protein 68 (DUBA-5)                                                                                                                                                                                                          |                                                                                                                                                                                                                                                            |                                                                                                                                                                                                                                                                                                                                                                                                                                                                                                                                                                                                                                                      |                                                                                           |                            |                                       |                                    |





| Protein Name | Uniprot Name | Other Names                   | Uniprot ID                                                                                                                                                                     | Refseq IDs                      | Protein Description                                                                                                                                                                                                                                                                                | GO ID                                                                                                                                                                                          | GO terms                                                                                                                                                                                                                                                                                                                                                                         | Subcellular location                                                                                                                                                                                                                                                                                                                           | Comments                                                    | Comments - Database Search | Comments - Database Search            | Function                           |
|--------------|--------------|-------------------------------|--------------------------------------------------------------------------------------------------------------------------------------------------------------------------------|---------------------------------|----------------------------------------------------------------------------------------------------------------------------------------------------------------------------------------------------------------------------------------------------------------------------------------------------|------------------------------------------------------------------------------------------------------------------------------------------------------------------------------------------------|----------------------------------------------------------------------------------------------------------------------------------------------------------------------------------------------------------------------------------------------------------------------------------------------------------------------------------------------------------------------------------|------------------------------------------------------------------------------------------------------------------------------------------------------------------------------------------------------------------------------------------------------------------------------------------------------------------------------------------------|-------------------------------------------------------------|----------------------------|---------------------------------------|------------------------------------|
| 1206 DTYMK   | DTYMK_HUMAN  | DTYMK; Q6FGU2; KTHY           | P23919; Q6FGU2; Q6FGX1; Q6BUX4                                                                                                                                                 | NP_036277; XP_001126211         | Thymidylate kinase (EC 2.7.4.5) (dTMP kinase); DTYMK protein (Deoxythymidylate kinase) (Thymidylate kinase) (Deoxythymidylate kinase (Thymidylate kinase, isoform CRA_b) (Putative uncharacterized protein tmp_locus_5) (Fragment)                                                                 | GO:000524; GO:0007049; GO:0008283; GO:0005029; GO:0006233; GO:0019296; GO:0004798                                                                                                              | ATP binding; cell cycle; cell proliferation; cytosol; dTDP biosynthetic process; nucleoside kinase activity; thymidylate kinase activity                                                                                                                                                                                                                                         |                                                                                                                                                                                                                                                                                                                                                |                                                             |                            |                                       | Kinase                             |
| 1207 TSSK4   | TSSK4_HUMAN  | TSSK4                         | Q65A08; Q2T6A0; Q6ZNM2                                                                                                                                                         | NP_777604                       | Testis-specific serine/threonine-protein kinase 4 (TSSK-4) (Testis-specific kinase 4) (TSK-4) (EC 2.7.11.1) (Serine/threonine-protein kinase 22E)                                                                                                                                                  | GO:0030154; GO:0000287; GO:0007275; GO:0032793; GO:0006468; GO:0005515; GO:0004674; GO:0007283                                                                                                 | ATP binding; cell differentiation; magnesium ion binding; multicellular organismal development; positive regulation of CREB transcription factor activity; protein amino acid phosphorylation; protein binding; protein serine/threonine kinase activity; spermatogenesis                                                                                                        |                                                                                                                                                                                                                                                                                                                                                | Known in Uniprot to be phosphorylated                       |                            |                                       | Kinase                             |
| 1208 SEPT15  | SEPT15_HUMAN | SEPT15                        | O60613; Q4GZG7; Q8WU00; Q8B564; Q9GZW0; Q9NR01                                                                                                                                 | NP_004252; NP_976086            | 15 kDa selenoprotein                                                                                                                                                                                                                                                                               | GO:0051084; GO:0005783; GO:0005788; GO:0005515; GO:0008430                                                                                                                                     | 'de novo' posttranslational protein folding; endoplasmic reticulum; endoplasmic reticulum lumen; protein binding; selenium binding                                                                                                                                                                                                                                               | Endoplasmicreticulum lumen                                                                                                                                                                                                                                                                                                                     |                                                             |                            |                                       |                                    |
| 1209 ACSL3   | ACSL3_HUMAN  | ACSL3                         | Q9NR01; Q95373; Q60192; Q8LUM9                                                                                                                                                 | NP_004448; NP_976251            | Long-chain-fatty-acyl-CoA ligase 3 (EC 6.2.1.3) (Long-chain acyl-CoA synthetase 3) (LACS 3)                                                                                                                                                                                                        | GO:0005789; GO:0006631; GO:0004321; GO:0016021; GO:0004467; GO:0000287; GO:0005792; GO:0005741; GO:0005778; GO:0005515                                                                         | endoplasmic reticulum membrane; fatty acid metabolic process; fatty-acyl-CoA synthase activity; integral to membrane; long-chain-fatty-acyl-CoA ligase activity; magnesium ion binding; microsome; mitochondrial outer membrane; peroxisomal membrane; protein binding                                                                                                           | Mitochondrionouter membraneSinglepass type III membraneprotein                                                                                                                                                                                                                                                                                 | Known in Uniprot to be phosphorylated                       |                            | Known in HPRD to be phosphorylated    |                                    |
| 1210 MCA1    | MCA1_HUMAN   | MCA1                          | Q12904; B3KTR2; Q6FC28; Q6QCF9                                                                                                                                                 | NP_004748; NP_001135            | Multisynthetase complex auxiliary component p43 (Cleaved into: Endothelial monocyte-activating polypeptide 2 (EMAP-II) (Small inducible cytokine subfamily 6 member 1))                                                                                                                            | GO:0017101; GO:0043498; GO:0007267; GO:0000287; GO:0005792; GO:0005741; GO:0005778; GO:0005515                                                                                                 | aminoacyl-tRNA synthetase multienzyme complex; cell surface binding; cell-cell signaling; chemotaxis; cytokine activity; extracellular space; inflammatory response; leukocyte migration; negative regulation of endothelial cell proliferation; protein homodimerization activity; signal transduction; tRNA aminoacylation for protein translation; tRNA binding               |                                                                                                                                                                                                                                                                                                                                                |                                                             |                            |                                       |                                    |
| 1211 OST5    | OST5_HUMAN   | OST5; HS355; ASK1J2           | Q81ZT8; Q81ZT9; ASK1J2                                                                                                                                                         | NP_705840                       | Heparan sulfate glucosaminyl 3-O-sulfotransferase 5 (EC 2.8.2.23) (Heparan sulfate D-glucosaminyl 3-O-sulfotransferase 5) (Heparan sulfate 3-O-sulfotransferase 5) (h3-OST-5)                                                                                                                      | GO:0005656; GO:0000139; GO:0008967; GO:0015015; GO:0016021; GO:0000287; GO:0006477; GO:0005515; GO:0004696                                                                                     | 3'-phosphoadenosine 5'-phosphosulfate binding; Golgi membrane; [heparan sulfate]-glucosaminyl 3-sulfotransferase 1 activity; heparan sulfate proteoglycan biosynthetic process, enzymatic modification; integral to membrane; negative regulation of coagulation; protein amino acid sulfation; protein binding; regulation of virion penetration into host cell protein binding | GolgiapparatusmembraneSinglepass type II membraneprotein                                                                                                                                                                                                                                                                                       |                                                             |                            |                                       |                                    |
| 1212 QIL1    | QIL1_HUMAN   | Q5XKP0; QIL1                  | Q5XKP0; Q80Y85; Q98K93; Q5JL82; Q9KQ99                                                                                                                                         | XP_058957; NP_991330            | Protein QIL1 (Protein P117)                                                                                                                                                                                                                                                                        | GO:0005515                                                                                                                                                                                     | calcium ion binding                                                                                                                                                                                                                                                                                                                                                              |                                                                                                                                                                                                                                                                                                                                                |                                                             |                            |                                       |                                    |
| 1213 PGI2B   | PGI2B_HUMAN  | PGI2B                         | Q98K93; Q5JL82; Q9KQ99                                                                                                                                                         | NP_115951                       | Group XII secretory phospholipase A2-like protein (Group XIII secretory phospholipase A2-like protein) (GXII sPLA2-like) (sPLA2-GXII) (GXII)                                                                                                                                                       | GO:0005509; GO:0005576; GO:0016042; GO:0004623                                                                                                                                                 | calcium ion binding; extracellular region; lipid catabolic process; phospholipase A2 activity                                                                                                                                                                                                                                                                                    | Secreted                                                                                                                                                                                                                                                                                                                                       |                                                             |                            |                                       |                                    |
| 1214 BCAP    | BCAP_HUMAN   | Q6ZULB; Q86V13; Q8NACB; BCAP  | Q6ZULB; Q86V13; Q8NACB; Q8NACB; Q86V13; Q8N285; Q5T7E8; Q8ND84; Q8TAF7; Q8WUA5; Q9HCS9; Q9NRU4; Q9NX60                                                                         | NP_689522                       | Phosphoinositide 3-kinase adapter protein 1 (B-cell phosphoinositide 3-kinase adapter protein 1) (B-cell adapter for phosphoinositide 3-kinase); FL300308 protein (Fragment)                                                                                                                       | GO:0005737; GO:0005866; GO:0005515; GO:0005066                                                                                                                                                 | cytoplasm; plasma membrane; protein binding; transmembrane receptor protein tyrosine kinase signaling protein activity                                                                                                                                                                                                                                                           | CytoplasmCellmembrane                                                                                                                                                                                                                                                                                                                          |                                                             |                            | Known in Uniprot to be phosphorylated |                                    |
| 1215 GTPB2   | GTPB2_HUMAN  | GTPB2                         | NP_061969                                                                                                                                                                      | NP_061969                       | GTP-binding protein 2                                                                                                                                                                                                                                                                              | GO:0005525; GO:0003924                                                                                                                                                                         | GTP binding; GTPase activity                                                                                                                                                                                                                                                                                                                                                     |                                                                                                                                                                                                                                                                                                                                                |                                                             |                            |                                       |                                    |
| 1216 TLK2    | TLK2_HUMAN   | TLK2                          | Q86UE8; Q9AKT7; Q9Y4F7                                                                                                                                                         | NP_006843; NP_001106            | Serine/threonine-protein kinase touled-like 2 (EC 2.7.11.1) (Touled-like kinase 2) (PKU-alpha)                                                                                                                                                                                                     | GO:0005524; GO:0007049; GO:0016568; GO:0007242; GO:0006468; GO:0005515; GO:0004674; GO:0001672; GO:0006974                                                                                     | ATP binding; cell cycle; chromatin modification; intracellular signaling cascade; nucleus; protein amino acid phosphorylation; protein binding; protein serine/threonine kinase activity; regulation of chromatin assembly or disassembly; response to DNA damage stimulus                                                                                                       | Nucleus                                                                                                                                                                                                                                                                                                                                        | Known in Uniprot to be phosphorylated                       |                            | Known in HPRD to be phosphorylated    | Kinase                             |
| 1217 PGSG    | PGSG_HUMAN   | PGSG; Q5VQW6; SRGN            | Q5VQW6; P10124                                                                                                                                                                 | NP_002718                       | Serglycin (Secretory granule proteoglycan core protein) (Platelet proteoglycan core protein) (P-PC) (Hematopoietic proteoglycan core protein)                                                                                                                                                      | GO:0005929; GO:0005737; GO:0001861; GO:0005525; GO:0003924; GO:0007266; GO:0005622; GO:0005866; GO:0008284; GO:0005515; GO:0016020; GO:0007264                                                 | cilium; cytoplasm; flagellum; microtubule                                                                                                                                                                                                                                                                                                                                        | Golgi apparatus; apoptosis; extracellular space; maintenance of granule B location in T cell secretory granule; maintenance of protease location in mast cell secretory granule; mast cell granule; negative regulation of bone mineralization; negative regulation of cytokine secretion; protein binding; protein maturation via proteolysis | CytoplasmicgranuleSecretoryextracellularspaceGolgiapparatus |                            |                                       |                                    |
| 1218 MPPH1   | MPPH1_HUMAN  | MPPH1                         | Q5T9M9; Q96Q89; Q4Z277; Q9N971; Q2K073; Q32NE1; Q561V3; Q58E8B; Q5T9M8; Q5T9M9; Q5T9N0; Q5T9N1; Q7KZ68; Q7Z5E0; Q7Z5E1; Q7Z5M9; Q86X82; Q9N3R8; Q9H6Q9; Q9H755; Q9NCT1; Q9UFR5 | NP_057279                       | M-phase phosphoprotein 1 (MPP1) (Kinesin-related motor interacting with PIN1) (Cancer/testis antigen 90) (CT90)                                                                                                                                                                                    | GO:0005929; GO:0005737; GO:0001861; GO:0005525; GO:0003924; GO:0007266; GO:0005622; GO:0005866; GO:0008284; GO:0005515; GO:0016020; GO:0007264                                                 | ATP binding; ATPase activity; WW domain binding; cell cycle arrest; cell division; centrosome; microtubule; microtubule motor activity; microtubule-based movement; nucleolus; nucleoplasm; regulation of mitosis                                                                                                                                                                | CytoplasmNucleus                                                                                                                                                                                                                                                                                                                               | Known in Uniprot to be phosphorylated                       |                            | Known in HPRD to be phosphorylated    |                                    |
| 1219 SPG17   | SPG17_HUMAN  | Q6Q759; SPG17                 | Q6Q759; Q8NA21; Q9NT21                                                                                                                                                         | XP_117198; NP_996879            | Sperm-associated antigen 17 (Projection protein FFG homologue)                                                                                                                                                                                                                                     | GO:0005929; GO:0005737; GO:0001861; GO:0005525; GO:0003924; GO:0007266; GO:0005622; GO:0005866; GO:0008284; GO:0005515; GO:0016020; GO:0007264                                                 | cilium; cytoplasm; flagellum; microtubule                                                                                                                                                                                                                                                                                                                                        | Golgi apparatus; apoptosis; extracellular space; maintenance of granule B location in T cell secretory granule; maintenance of protease location in mast cell secretory granule; mast cell granule; negative regulation of bone mineralization; negative regulation of cytokine secretion; protein binding; protein maturation via proteolysis | CytoplasmCellprojectio nCiliumFlagellumaxoneme              |                            |                                       |                                    |
| 1220 RHOG    | RHOG_HUMAN   | RHOG; Q61CQ8                  | P84095; Q61CQ8; P35238; Q8N1D4                                                                                                                                                 | NP_001656                       | Rho-related GTP-binding protein Rhog; ARHG protein (Ras homolog gene family, member G (Rho G)) (Ras homolog gene family, member G (Rho G), isoform CRA_a) (Fragment)                                                                                                                               | GO:0005929; GO:0005737; GO:0001861; GO:0005525; GO:0003924; GO:0007266; GO:0005622; GO:0005866; GO:0008284; GO:0005515; GO:0016020; GO:0007264                                                 | GTP binding; GTPase activity; Rho protein signal transduction; intracellular; plasma membrane; positive regulation of cell proliferation; protein binding; membrane; small GTPase mediated signal transduction                                                                                                                                                                   | Cellmembraneplasma membraneCytoplasmicnucleus                                                                                                                                                                                                                                                                                                  |                                                             |                            |                                       |                                    |
| 1221 LTB15   | LTB15_HUMAN  | LTB15; LTBP1; LTB1L           | P22064; Q14766; A113V1; Q53S08; Q53SF3; Q53SG1; Q59HF7; Q8T095                                                                                                                 | NP_000618; NP_996826; XP_115812 | Latent-transforming growth factor beta-binding protein 1 (LTBP-1) (Transforming growth factor beta-1-binding protein 1) (TGF-beta1-BP-1)                                                                                                                                                           | GO:0005929; GO:0005737; GO:0001861; GO:0005525; GO:0003924; GO:0007266; GO:0005622; GO:0005866; GO:0008284; GO:0005515; GO:0016020; GO:0007264                                                 | ATP binding; ATPase activity; WW domain binding; cell cycle arrest; cell division; centrosome; microtubule; microtubule motor activity; microtubule-based movement; nucleolus; nucleoplasm; regulation of mitosis                                                                                                                                                                | CytoplasmCellprojectio nCiliumFlagellumaxoneme                                                                                                                                                                                                                                                                                                 | Known in Uniprot to be phosphorylated                       |                            |                                       |                                    |
| 1222 ANR53   | ANR53_HUMAN  | ANR53                         | Q81YR8; Q8N9V6                                                                                                                                                                 | NP_079209; NP_001108            | Ankyrin repeat domain-containing protein 53                                                                                                                                                                                                                                                        | GO:0005929; GO:0005737; GO:0001861; GO:0005525; GO:0003924; GO:0007266; GO:0005622; GO:0005866; GO:0008284; GO:0005515; GO:0016020; GO:0007264                                                 | ATP binding; ATPase activity; WW domain binding; cell cycle arrest; cell division; centrosome; microtubule; microtubule motor activity; microtubule-based movement; nucleolus; nucleoplasm; regulation of mitosis                                                                                                                                                                | CytoplasmCellprojectio nCiliumFlagellumaxoneme                                                                                                                                                                                                                                                                                                 |                                                             |                            |                                       |                                    |
| 1223 TBA3E   | TBA3E_HUMAN  | Q6PEV2; TBA3E                 | Q6PEV2                                                                                                                                                                         | XP_053177; NP_997195            | Tubulin alpha-3E chain (Alpha-tubulin 3E)                                                                                                                                                                                                                                                          | GO:0005929; GO:0005737; GO:0001861; GO:0005525; GO:0003924; GO:0007266; GO:0005622; GO:0005866; GO:0008284; GO:0005515; GO:0016020; GO:0007264                                                 | GTP binding; GTPase activity; microtubule; microtubule-based movement; protein complex; protein polymerization; structural molecule activity                                                                                                                                                                                                                                     |                                                                                                                                                                                                                                                                                                                                                | Known in Uniprot to be phosphorylated                       |                            |                                       | Known in HPRD to be phosphorylated |
| 1224 NLF1    | NLF1_HUMAN   | Q8NCU7                        | XP_096852                                                                                                                                                                      | NP_997205                       | Nuclear-localized factor 1 (Protein FAMI48A)                                                                                                                                                                                                                                                       | GO:0005929; GO:0005737; GO:0001861; GO:0005525; GO:0003924; GO:0007266; GO:0005622; GO:0005866; GO:0008284; GO:0005515; GO:0016020; GO:0007264                                                 | ATP binding; ATPase activity; WW domain binding; cell cycle arrest; cell division; centrosome; microtubule; microtubule motor activity; microtubule-based movement; nucleolus; nucleoplasm; regulation of mitosis                                                                                                                                                                | Nucleus                                                                                                                                                                                                                                                                                                                                        |                                                             |                            |                                       |                                    |
| 1225 CDC6    | CDC6_HUMAN   | CCDC6; Q05CFB; Q05CF9; Q6Q5G7 | Q16204; Q15250; Q05CF9; Q6Q5G7                                                                                                                                                 | NP_005427                       | Coiled-coil domain-containing protein 6 (Protein H4) (Papillary thyroid carcinoma-encoded protein); CDC6 protein (Fragment); Coiled-coil domain containing 6 (Coiled-coil domain containing 6, isoform CRA_a) (cDNA FL75411, highly similar to Homo sapiens coiled-coil domain containing 6, mRNA) | GO:0017124; GO:0005737; GO:0005856; GO:0005520; GO:0005929; GO:0005737; GO:0001861; GO:0005525; GO:0003924; GO:0007266; GO:0005622; GO:0005866; GO:0008284; GO:0005515; GO:0016020; GO:0007264 | SH3 domain binding; cytoplasm; cytoskeleton; structural constituent of cytoskeleton                                                                                                                                                                                                                                                                                              | CytoplasmCytoplasmcytoskeleton                                                                                                                                                                                                                                                                                                                 | Known in Uniprot to be phosphorylated                       |                            | Known in HPRD to be phosphorylated    |                                    |
| 1226 ASB18   | ASB18_HUMAN  | Q6ZVZ8; ASB18                 | Q6ZVZ8                                                                                                                                                                         | XP_292989; NP_997721            | Ankyrin repeat and SOCS box-containing protein 18 (ASB-18)                                                                                                                                                                                                                                         | GO:0005929; GO:0005737; GO:0001861; GO:0005525; GO:0003924; GO:0007266; GO:0005622; GO:0005866; GO:0008284; GO:0005515; GO:0016020; GO:0007264                                                 | ATP binding; ATPase activity; WW domain binding; cell cycle arrest; cell division; centrosome; microtubule; microtubule motor activity; microtubule-based movement; nucleolus; nucleoplasm; regulation of mitosis                                                                                                                                                                | CytoplasmCellprojectio nCiliumFlagellumaxoneme                                                                                                                                                                                                                                                                                                 |                                                             |                            |                                       |                                    |
| 1227 TMED8   | TMED8_HUMAN  | TMED8                         | Q6PL24; B3KTB8; Q1M3B0; Q9P1V9                                                                                                                                                 | NP_208746; NP_998766            | Protein TMED8                                                                                                                                                                                                                                                                                      | GO:0005929; GO:0005737; GO:0001861; GO:0005525; GO:0003924; GO:0007266; GO:0005622; GO:0005866; GO:0008284; GO:0005515; GO:0016020; GO:0007264                                                 | ATP binding; ATPase activity; WW domain binding; cell cycle arrest; cell division; centrosome; microtubule; microtubule motor activity; microtubule-based movement; nucleolus; nucleoplasm; regulation of mitosis                                                                                                                                                                | CytoplasmNucleus                                                                                                                                                                                                                                                                                                                               |                                                             |                            |                                       |                                    |
| 1228 K22E    | K22E_HUMAN   | K22E                          | Q40A02; P35908                                                                                                                                                                 | NP_000414                       | Keratin, type II cytoskeletal 2 epidermal (Cytokeratin-2e) (CK 2e) (K2e) (keratin-2)                                                                                                                                                                                                               | GO:0005813; GO:0045095; GO:0031424; GO:0032980; GO:0051546; GO:0043616; GO:0005515; GO:0005200                                                                                                 | centrosome; keratin filament; keratinization; keratinocyte activation; keratinocyte migration; keratinocyte proliferation; protein binding; structural constituent of cytoskeleton                                                                                                                                                                                               |                                                                                                                                                                                                                                                                                                                                                | Known in Uniprot to be phosphorylated                       |                            |                                       |                                    |

| Protein Name | Uniprot Name | Other Names          | Uniprot IDs                                                    | Refseq IDs                                 | Protein Description                                                                                                                                                                                                                                                                                                                                                                                         | GO ID                                                                                                                                                                                                                                                                  | GO terms                                                                                                                                                                                                                                                                                                                                                                                                                                                                                                                                                                                                                                      | Subcellular location                           | Comments                              | Comments - Database Search            | Comments - Database Search         | Function |
|--------------|--------------|----------------------|----------------------------------------------------------------|--------------------------------------------|-------------------------------------------------------------------------------------------------------------------------------------------------------------------------------------------------------------------------------------------------------------------------------------------------------------------------------------------------------------------------------------------------------------|------------------------------------------------------------------------------------------------------------------------------------------------------------------------------------------------------------------------------------------------------------------------|-----------------------------------------------------------------------------------------------------------------------------------------------------------------------------------------------------------------------------------------------------------------------------------------------------------------------------------------------------------------------------------------------------------------------------------------------------------------------------------------------------------------------------------------------------------------------------------------------------------------------------------------------|------------------------------------------------|---------------------------------------|---------------------------------------|------------------------------------|----------|
| 1229         | MTAP_HUMAN   | MTAP; Q5T3P3         | Q13126; Q9H010                                                 | NP_002442                                  | S-methyl-5'-thioadenosine phosphorylase (EC 2.4.2.28) (S-methylthioadenosine phosphorylase) (MTA phosphorylase) (MTAPase); Methylthioadenosine phosphorylase (Methylthioadenosine phosphorylase, isoform CRA_b)                                                                                                                                                                                             | GO:0017061; GO:0005737; GO:0009116; GO:0000465; GO:0016763                                                                                                                                                                                                             | S-methyl-5'-thioadenosine phosphorylase activity; cytoplasm; nucleoside metabolic process; phosphorylase activity; nucleoside metabolic process; transferase activity, transferring pentosyl groups                                                                                                                                                                                                                                                                                                                                                                                                                                           | Cytoplasm;                                     |                                       | Known in Uniprot to be phosphorylated | Known in HPRD to be phosphorylated |          |
| 1230         | SYWC_HUMAN   | SYWC; Q53XB6         | P23381; Q52XB6; P78535; Q9H0J3                                 | NP_004175; NP_776049; NP_998810; NP_998811 | Tryptophanyl-tRNA synthetase, cytoplasmic (EC 6.1.1.2) (Tryptophan--tRNA ligase) (TrpRS); Interferon-induced protein 53 (IPF53) (HWFS5); Full-length cDNA clone C50M04YH09 of Fetal liver of Homo sapiens (human) (Tryptophanyl-tRNA synthetase, isoform CRA_a) (cDNA FL313153B fs, clone NT2R2000727, highly similar to TRYPTOPHANYL-tRNA SYNTHETASE (EC 6.1.1.2)) (Putative uncharacterized protein WARS) | GO:0005524; GO:0005737; GO:0008285; GO:0005629; GO:0004830; GO:0006436                                                                                                                                                                                                 | ATP binding; cytoplasm; negative regulation of cell proliferation; soluble fraction; tryptophan-tRNA ligase activity; tryptophanyl-tRNA aminoacylation                                                                                                                                                                                                                                                                                                                                                                                                                                                                                        | Cytoplasm;                                     |                                       | Known in Uniprot to be phosphorylated | Known in HPRD to be phosphorylated |          |
| 1231         | SNAA_HUMAN   | SNAA; ABK879         | Q96IK3; P54920; Q9BV13; ABK879                                 | NP_003818                                  | Alpha-soluble NSF attachment protein (SNAP-alpha) (N-ethylmaleimide-sensitive factor attachment protein alpha)                                                                                                                                                                                                                                                                                              | GO:0005794; GO:0005783; GO:0006891; GO:0006886; GO:0016020; GO:0015758; GO:0016021; GO:0005351; GO:0006944                                                                                                                                                             | Golgi apparatus; endoplasmic reticulum; intra-Golgi vesicle-mediated transport; intracellular protein transport; membrane; membrane fusion                                                                                                                                                                                                                                                                                                                                                                                                                                                                                                    | Membrane/Periplasmic membrane/protein          |                                       |                                       |                                    |          |
| 1232         | GTR9_HUMAN   | Q8WV30; GTR9         | Q8WV30; Q9NR80; Q9WGC4; Q9W511; Q96P90                         | NP_064425; NP_001001                       | Solute carrier family 2, facilitated glucose transporter member 9 (Glucose transporter type 9) (GLUT-9)                                                                                                                                                                                                                                                                                                     | GO:0005524; GO:0005783; GO:0005515; GO:0007243                                                                                                                                                                                                                         | glucose transport; integral to membrane; sugar/hydrogen symporter activity; transmembrane transport                                                                                                                                                                                                                                                                                                                                                                                                                                                                                                                                           | Membrane/Multipassmembrane/protein             |                                       |                                       |                                    |          |
| 1233         | GLU2B_HUMAN  | GLU2B                | P14314; Q96BU9; Q96D06; Q9W0V9                                 | NP_002734; NP_001001                       | Glucosidase 2 subunit beta (Glucosidase II subunit beta) (Protein kinase C substrate 60.1 kDa protein heavy chain) (PKCSH) (BOK-H protein)                                                                                                                                                                                                                                                                  | GO:0005509; GO:0005783; GO:0005515; GO:0007243                                                                                                                                                                                                                         | calcium ion binding; endoplasmic reticulum; protein binding; protein kinase cascade                                                                                                                                                                                                                                                                                                                                                                                                                                                                                                                                                           | Endoplasmicreticulum                           |                                       | Known in Uniprot to be phosphorylated |                                    |          |
| 1234         | UGPA2_HUMAN  | UGPA2; UGPA          | Q16851; Q07131; Q9WR62; Q8EY81; Q9BU15                         | NP_006750; NP_001001                       | UTP--glucose-1-phosphate uridylyltransferase (EC 2.7.7.9) (UDP-glucose pyrophosphorylase) (UDGP) (UGPase)                                                                                                                                                                                                                                                                                                   | GO:0006011; GO:0003983; GO:0005829; GO:0016310; GO:0005515                                                                                                                                                                                                             | UDP-glucose metabolic process; UTP-glucose-1-phosphate uridylyltransferase activity; cytosol; phosphorylation; protein binding                                                                                                                                                                                                                                                                                                                                                                                                                                                                                                                | Cytoplasm                                      |                                       |                                       |                                    |          |
| 1235         | TCPQ_HUMAN   | TCPQ                 | Q4VBR9; A6NNS4                                                 | NP_006576                                  | T-complex protein 1 subunit theta (TCP-1-theta) (CCT-theta) (Renal carcinoma antigen NY-REN-15)                                                                                                                                                                                                                                                                                                             | GO:0005524; GO:0042623; GO:0005829; GO:0006497; GO:0016021; GO:0005640; GO:0005661; GO:0045454; GO:0005529; GO:0009055; GO:0006749; GO:0004362; GO:0005739; GO:0005514                                                                                                 | ATP binding; ATPase activity, coupled; cytosol; protein folding; unfolded protein binding                                                                                                                                                                                                                                                                                                                                                                                                                                                                                                                                                     | Cytoplasm                                      | Known in Uniprot to be phosphorylated |                                       |                                    |          |
| 1236         | E2IG5_HUMAN  | E2IG5; Q9H2P1; F162A | Q9NRN6; Q96A26; Q9L3U6; Q9H2P1; Q725C9; Q9NPE3                 | NP_055182                                  | UPO389 protein FAM162A (E2-induced gene 5 protein); DC16                                                                                                                                                                                                                                                                                                                                                    | GO:0016021                                                                                                                                                                                                                                                             | integral to membrane;                                                                                                                                                                                                                                                                                                                                                                                                                                                                                                                                                                                                                         | Membrane/Singlepassmembrane/protein            |                                       |                                       |                                    |          |
| 1237         | GSHR_HUMAN   | GSHR                 | NP_000628                                                      | NP_000628                                  | Glutathione reductase, mitochondrial (Grase) (GR) (EC 1.8.1.7)                                                                                                                                                                                                                                                                                                                                              | GO:0005060; GO:0005661; GO:0045454; GO:0005529; GO:0009055; GO:0006749; GO:0004362; GO:0005739; GO:0005514                                                                                                                                                             | NAD binding; NADP or NADPH binding; cell redox homeostasis; cytosol; electron carrier activity; glutathione metabolic process; glutathione-disulfide reductase activity; mitochondrial; oxidation reduction                                                                                                                                                                                                                                                                                                                                                                                                                                   | Mitochondrion/Cytoplasm                        | Known in Uniprot to be phosphorylated |                                       |                                    |          |
| 1238         | TBCB_HUMAN   | TBCB                 | Q99426; Q08193; Q00674; Q14728                                 | NP_001272                                  | Tubulin folding cofactor B (Tubulin-specific chaperone B) (Cytoskeleton-associated protein 1) (Cytoskeleton-associated protein KAP1)                                                                                                                                                                                                                                                                        | GO:0003154; GO:0005737; GO:0005874; GO:0007399; GO:0005515                                                                                                                                                                                                             | cell differentiation; cytoplasm; microtubule; nucleus; protein binding                                                                                                                                                                                                                                                                                                                                                                                                                                                                                                                                                                        | Cytoplasm/Cytoplasmcytoskeleton                | Known in Uniprot to be phosphorylated | Known in HPRD to be phosphorylated    |                                    |          |
| 1239         | THIO_HUMAN   | THIO; Q5T937         | Q10590; Q5T937; Q53X69; Q96K13                                 | NP_003320                                  | Thioredoxin (Tx) (ATL-derived factor) (ADF) (Surface-associated sulphhydryl protein) (SASP)                                                                                                                                                                                                                                                                                                                 | GO:0005829; GO:0045454; GO:0007377; GO:0005829; GO:0022900; GO:0005515; GO:0007165; GO:0006810                                                                                                                                                                         | cell motility; cell proliferation; cell redox homeostasis; cell-cell signaling; cytosol; electron transport chain; protein binding; signal transduction; transport                                                                                                                                                                                                                                                                                                                                                                                                                                                                            | Cytoplasm                                      | Known in Uniprot to be phosphorylated |                                       |                                    |          |
| 1240         | PGAM2_HUMAN  | PGAM2                | P15259                                                         | NP_000281                                  | Phosphoglycerate mutase 2 (EC 5.4.2.1) (EC 5.4.2.4) (EC 3.1.3.13) (Phosphoglycerate mutase isozyme M) (PGAM-M) (BPG-dependent PGAM 2) (Muscle-specific phosphoglycerate mutase)                                                                                                                                                                                                                             | GO:0004083; GO:0004082; GO:0006096; GO:0006419; GO:0005127                                                                                                                                                                                                             | bisphosphoglycerate 2-phosphatase activity; bisphosphoglycerate mutase activity; glycolysis; phosphoglycerate mutase activity; striated muscle contraction                                                                                                                                                                                                                                                                                                                                                                                                                                                                                    | Cytoplasm                                      |                                       |                                       |                                    |          |
| 1241         | MFAP1_HUMAN  | Q86TG6; MFAP1        | Q86TG6; P55081                                                 | NP_005917                                  | Microfibrillar-associated protein 1                                                                                                                                                                                                                                                                                                                                                                         | GO:0001527                                                                                                                                                                                                                                                             | secreted                                                                                                                                                                                                                                                                                                                                                                                                                                                                                                                                                                                                                                      | Secreted/extracellularmatrix                   | Known in Uniprot to be phosphorylated | Known in HPRD to be phosphorylated    |                                    |          |
| 1242         | CV019_HUMAN  | CV019; THOC3         | NP_013769; Q6838; Q9UR25                                       | NP_003669; NP_001002                       | THO complex subunit 5 homolog (NF2/meningioma region protein pK1.3) (Placental protein 39.2)                                                                                                                                                                                                                                                                                                                | GO:0005737; GO:0005634                                                                                                                                                                                                                                                 | cytoplasm; nucleus                                                                                                                                                                                                                                                                                                                                                                                                                                                                                                                                                                                                                            | Nucleus/Cytoplasm                              | Known in Uniprot to be phosphorylated | Known in HPRD to be phosphorylated    |                                    |          |
| 1243         | LY6D_HUMAN   | Q9S866; Q4VX50; LY6D | Q9S866; A2BEY8; B0UXC3; B0V019; B0V1Y6; Q4VX50                 | NP_067069                                  | Lymphocyte antigen 6 complex locus protein G6d (Protein Ly6-D) (Megakaryocyte-enhanced gene transcript 1 protein)                                                                                                                                                                                                                                                                                           | GO:0011225; GO:0005886                                                                                                                                                                                                                                                 | anchored to membrane; plasma membrane                                                                                                                                                                                                                                                                                                                                                                                                                                                                                                                                                                                                         | Cellmembrane/LipidanchorgPIanchor              |                                       |                                       |                                    |          |
| 1244         | MY18B_HUMAN  | MY18B                | Q81UG5; Q8ND8; Q8TE55; Q8WWS0; Q96KH2; Q96KR8; Q96KR9          | NP_115997                                  | Myosin-XVIIIb                                                                                                                                                                                                                                                                                                                                                                                               | GO:0005524; GO:0003779; GO:0005737; GO:0003774; GO:0016461                                                                                                                                                                                                             | ATP binding; actin binding; cytoplasm; motor activity; nucleus; unconventional myosin complex                                                                                                                                                                                                                                                                                                                                                                                                                                                                                                                                                 | Cytoplasm/Nucleus/Cytoplasmmyofibril/sarcomere | Known in Uniprot to be phosphorylated |                                       |                                    |          |
| 1245         | NDUA6_HUMAN  | NDUA6                | P56556; B2RFE4; Q43675; Q9FGW0; Q9IBT8; Q61C39                 | NP_002481                                  | NADH dehydrogenase [ubiquinone] 1 alpha subcomplex subunit 6 (NADH-ubiquinone oxidoreductase B14 subunit) (Complex I-B14) (CI-B14) (LYR motif-containing protein 6)                                                                                                                                                                                                                                         | GO:0008137; GO:0005629; GO:0005747; GO:0006979; GO:0006810                                                                                                                                                                                                             | NADH dehydrogenase (ubiquinone) activity; mitochondrial electron transport; NADH to ubiquinone; mitochondrial respiratory chain complex I; response to oxidative stress; transport                                                                                                                                                                                                                                                                                                                                                                                                                                                            | Mitochondrion/membrane/Matrixinnermembrane     |                                       |                                       |                                    |          |
| 1246         | ENDD1_HUMAN  | ENDD1                | Q94919; Q91908                                                 | XP_290546; NP_055511                       | Endonuclease domain-containing 1 protein (EC 3.1.30...)                                                                                                                                                                                                                                                                                                                                                     | GO:0004519; GO:0005576; GO:0046872; GO:0015986; GO:0015078; GO:0005515                                                                                                                                                                                                 | endonuclease activity; extracellular region; metal ion binding; nucleic acid binding                                                                                                                                                                                                                                                                                                                                                                                                                                                                                                                                                          | Secreted                                       |                                       |                                       |                                    |          |
| 1247         | ATP5L_HUMAN  | ATP5L; ABK0K3        | Q95B6V; Q95B76; Q9UB27; ABK0K3                                 | NP_006467                                  | ATP synthase subunit g, mitochondrial (ATPase subunit g)                                                                                                                                                                                                                                                                                                                                                    | GO:0004519; GO:0005576; GO:0046872; GO:0015986; GO:0015078; GO:0005515                                                                                                                                                                                                 | ATP synthesis coupled proton transport; hydrogen ion transmembrane transporter activity; mitochondrial proton-transporting ATP synthase complex, coupling factor (F0); protein binding                                                                                                                                                                                                                                                                                                                                                                                                                                                        | Mitochondrion/Mitochondrionmembrane            |                                       |                                       |                                    |          |
| 1248         | OR111_HUMAN  | OR111; A3KFL8        | Q8NFS3; Q8NFS1; Q96R88; A3KFL8                                 | XP_294531; NP_0010044                      | Olfactory receptor 111 (Olfactory receptor OR9-18); Olfactory receptor, family 1, subfamily 3, member 1                                                                                                                                                                                                                                                                                                     | GO:0007186; GO:0016021; GO:004984; GO:0005886; GO:0005096; GO:0005793; GO:0045454; GO:0005789; GO:0009100; GO:0005515; GO:0003756; GO:0006457; GO:0005737; GO:0006952; GO:0005635; GO:0005654; GO:0005515; GO:0003700; GO:0008270; GO:0005634                          | G-protein coupled receptor protein signaling pathway; integral to membrane; olfactory receptor activity; plasma membrane; response to stimulus; sensory perception of smell                                                                                                                                                                                                                                                                                                                                                                                                                                                                   | Cellmembrane/Multipassmembrane/protein         |                                       |                                       |                                    |          |
| 1249         | TXND4_HUMAN  | TXND4; ERP44         | Q98526; Q60319; Q4VXK1; Q5VW27; Q6W134; Q9W6X7                 | XP_088476; NP_055866                       | Thioredoxin domain-containing protein 4 (Endoplasmic reticulum resident protein ERp44)                                                                                                                                                                                                                                                                                                                      | GO:0005793; GO:0045454; GO:0005789; GO:0009100; GO:0005515; GO:0003756; GO:0006457; GO:0005737; GO:0006952; GO:0005635; GO:0005654; GO:0005515; GO:0003700; GO:0008270; GO:0005634                                                                                     | ER-Golgi intermediate compartment; cell redox homeostasis; endoplasmic reticulum lumen; endoplasmic reticulum membrane; glycoprotein metabolic process; protein binding; protein disulfide isomerase activity; protein folding; response to unfolded protein                                                                                                                                                                                                                                                                                                                                                                                  | Endoplasmicreticulum/lumen                     |                                       |                                       |                                    |          |
| 1250         | LY10_HUMAN   | LY10; Q8W131; B4DWV8 | Q13342; Q13341; Q42C66; Q5T1G1; Q92881; Q96TG3; B4DVV8; Q8W131 | NP_009168; NP_001005                       | Nuclear body protein SP140 (Nuclear autoantigen Sp-140) (Speckled 140 kDa) (Lymphoid-restricted homolog of Sp100) (LYSp100 protein); Similar to SP140 nuclear body protein (Fragment)                                                                                                                                                                                                                       | GO:0005737; GO:0006952; GO:0005635; GO:0005654; GO:0005515; GO:0003700; GO:0008270; GO:0005634                                                                                                                                                                         | cytoplasm; defense response; nuclear envelope; nucleoplasm; protein binding; transcription factor activity; zinc ion binding; nucleus                                                                                                                                                                                                                                                                                                                                                                                                                                                                                                         | Nucleus/Cytoplasm;                             |                                       |                                       |                                    |          |
| 1251         | APC_HUMAN    | APC                  | NP_000229; Q15162; Q15163; Q93042                              | NP_000229; NP_0011209                      | Adenomatous polyposis coli protein (Protein APC) (Deleted in polyposis 2.5)                                                                                                                                                                                                                                                                                                                                 | GO:0034747; GO:0060070; GO:0008013; GO:0013087; GO:0007155; GO:0007050; GO:0005813; GO:0002811; GO:0005829; GO:0000776; GO:0016328; GO:0008017; GO:0007094; GO:0007026; GO:0005634; GO:0043065; GO:0030335; GO:0006461; GO:0008605; GO:0019901; GO:0005198; GO:0006974 | Axin-APC-beta-catenin-GSK3B complex; Wnt receptor signaling pathway through beta-catenin; beta-catenin binding; beta-catenin destruction complex; cell adhesion; cell cycle arrest; centrosome; cytokinesis after mitosis; cytosol; kinetochore; lateral plasma membrane; microtubule binding; mitotic cell cycle spindle assembly checkpoint; negative regulation of cyclin-dependent protein kinase activity; negative regulation of microtubule depolymerization; nucleus; positive regulation of apoptosis; positive regulation of cell migration; positive regulation of pseudopodium assembly; protein complex assembly; protein kinase | Known in Uniprot to be phosphorylated          | Known in HPRD to be phosphorylated    |                                       |                                    |          |
| 1252         | WDR60_HUMAN  | WDR60                | Q8WV54; Q9NWS8                                                 | NP_060521                                  | WD repeat-containing protein 60                                                                                                                                                                                                                                                                                                                                                                             |                                                                                                                                                                                                                                                                        |                                                                                                                                                                                                                                                                                                                                                                                                                                                                                                                                                                                                                                               |                                                |                                       | Known in Uniprot to be phosphorylated |                                    |          |
| 1253         | SUMO2_HUMAN  | SUMO2; B2R412        | P61956; Q32422; P55825; Q61926; Q96KH1; B2R412                 | NP_008668; NP_001005                       | Small ubiquitin-related modifier 2 (SUMO-2) (Ubiquitin-like protein SMT3B) (SMT3 homolog 2) (Sentrin-2) (HSMT3) (SUMO-3)                                                                                                                                                                                                                                                                                    | GO:0019941; GO:0005634; GO:0005515; GO:0006464                                                                                                                                                                                                                         | modification-dependent protein catabolic process; nucleus; protein binding; protein modification process                                                                                                                                                                                                                                                                                                                                                                                                                                                                                                                                      | Nucleus                                        |                                       |                                       |                                    |          |
| 1254         | PK3CA_HUMAN  | PK3CA                | P42332; Q14CW1; Q99762                                         | NP_006209                                  | Phosphatidylinositol-4,5-bisphosphate 3-kinase catalytic subunit alpha isoform (EC 2.7.1.153) (PI3 kinase p110 subunit alpha) (PtdIns-3-kinase p110) (PI3K)                                                                                                                                                                                                                                                 | GO:0016303; GO:0005739; GO:0004934; GO:0005942; GO:0046854; GO:0048015                                                                                                                                                                                                 | 1-phosphatidylinositol-3-kinase activity; mitochondrial; phosphatidylinositol-4,5-bisphosphate 3-kinase activity; phosphoinositide 3-kinase complex; phosphoinositide phosphorylation; phosphoinositide-mediated signaling                                                                                                                                                                                                                                                                                                                                                                                                                    | Kinase                                         |                                       |                                       |                                    |          |



| Protein Name | Uniprot Name | Other Names | Uniprot ID                   | Refseq IDs                                                                                    | Protein Description                                                                                                                                | GO ID                                                                                                                                                                                                                                                                                                                                                                                                                                                      | GO terms                                                                                                                                                                                                                                                                                                                                                                                                                                                                                                                                                                                                                                                                                                                                                                                                                                                                                                                                                                                                                                                                                                                                                                                                                                                                                                                                                          | Subcellular location                                                                                                                                                                                                                                                                                                                                                                                                                                                  | Comments                              | Comments - Database Search            | Comments - Database Search            | Function |
|--------------|--------------|-------------|------------------------------|-----------------------------------------------------------------------------------------------|----------------------------------------------------------------------------------------------------------------------------------------------------|------------------------------------------------------------------------------------------------------------------------------------------------------------------------------------------------------------------------------------------------------------------------------------------------------------------------------------------------------------------------------------------------------------------------------------------------------------|-------------------------------------------------------------------------------------------------------------------------------------------------------------------------------------------------------------------------------------------------------------------------------------------------------------------------------------------------------------------------------------------------------------------------------------------------------------------------------------------------------------------------------------------------------------------------------------------------------------------------------------------------------------------------------------------------------------------------------------------------------------------------------------------------------------------------------------------------------------------------------------------------------------------------------------------------------------------------------------------------------------------------------------------------------------------------------------------------------------------------------------------------------------------------------------------------------------------------------------------------------------------------------------------------------------------------------------------------------------------|-----------------------------------------------------------------------------------------------------------------------------------------------------------------------------------------------------------------------------------------------------------------------------------------------------------------------------------------------------------------------------------------------------------------------------------------------------------------------|---------------------------------------|---------------------------------------|---------------------------------------|----------|
| 1276         | TGFB1_HUMAN  | TGFB1       | P11137; Q9UCG4               | NP_000551                                                                                     | Transforming growth factor beta-1 (TGF-beta-1) [Cleaved into: Latency-associated peptide (LAP)]                                                    | GO:0006754; GO:0031575; GO:0005796; GO:0007183; GO:0007050; GO:0002248; GO:0007173; GO:0019049; GO:0005015; GO:0010742; GO:0008083; GO:0006917; GO:0048535; GO:0008156; GO:0043537; GO:0030308; GO:0022408; GO:0050680; GO:0001533; GO:0016481; GO:0005634; GO:0042476; GO:0031093; GO:0043406; GO:0060391; GO:0043536; GO:0030501; GO:0050921; GO:0012967; GO:0010718; GO:0010763; GO:0032740; GO:0004260; GO:0005737; GO:0005856; GO:0000287; GO:0004614 | ATP biosynthetic process; G1/S transition checkpoint; Golgi lumen; SMAD protein complex assembly; cell cycle arrest; connective tissue replacement during inflammatory response; epidermal growth factor receptor signaling pathway; evasion of host defenses by virus; extracellular space; foam cell differentiation; growth factor activity; induction of apoptosis; lymph node development; negative regulation of DNA replication; negative regulation of blood vessel endothelial cell migration; negative regulation of cell growth; negative regulation of cell-cell adhesion; negative regulation of epithelial cell proliferation; negative regulation of mitotic cell cycle; negative regulation of protein amino acid phosphorylation; negative regulation of transcription; nucleus; ontogenesis; ossification involved in bone remodeling; platelet alpha granule lumen; positive regulation of MAP kinase activity; positive regulation of SMAD protein nuclear translocation; positive regulation of blood vessel endothelial cell migration; positive regulation of bone mineralization; positive regulation of chemotaxis; positive regulation of collagen biosynthetic process; positive regulation of epithelial to mesenchymal transition; positive cytoplasm; glucose metabolic process; magnesium ion binding; phosphoglucomutase activity | Secreted                                                                                                                                                                                                                                                                                                                                                                                                                                                              |                                       |                                       |                                       |          |
| 1277         | PGM2         | PGM2_HUMAN  | PGM2                         | Q96G03; Q539F5; Q5QTR0; Q9H0P9; Q9HW22                                                        | NP_060760                                                                                                                                          | Phosphoglucomutase-2 (PGM 2) (EC 5.4.2.2) (Glucose phosphomutase 2)                                                                                                                                                                                                                                                                                                                                                                                        | GO:0003779; GO:0005737; GO:0005856; GO:0005886                                                                                                                                                                                                                                                                                                                                                                                                                                                                                                                                                                                                                                                                                                                                                                                                                                                                                                                                                                                                                                                                                                                                                                                                                                                                                                                    | actin binding; cytoplasm; cytoskeleton; plasma membrane;                                                                                                                                                                                                                                                                                                                                                                                                              | Cytoplasm                             | Known in Uniprot to be phosphorylated |                                       |          |
| 1278         | FLNC         | FLNC_HUMAN  | FLNC; Q59H94; B2Z288         | NP_001449; NP_001120                                                                          | Filamin-C (Gamma-filamin) (Filamin-2) (Protein FLNC) (Actin-binding-like protein) (ABP-L) (ABP-295-like protein); Gamma filamin variant (Fragment) | GO:0003779; GO:0005737; GO:0005856; GO:0005886                                                                                                                                                                                                                                                                                                                                                                                                             | actin binding; cytoplasm; cytoskeleton; plasma membrane;                                                                                                                                                                                                                                                                                                                                                                                                                                                                                                                                                                                                                                                                                                                                                                                                                                                                                                                                                                                                                                                                                                                                                                                                                                                                                                          | Cytoplasm                                                                                                                                                                                                                                                                                                                                                                                                                                                             | MembranePeripheral                    | Known in Uniprot to be phosphorylated |                                       |          |
| 1279         | MAG1         | MAG1_HUMAN  | MAG1                         | Q96QZ7; Q00309; Q43863; Q75085; Q96QZ8; Q96QZ9                                                | NP_004733; NP_001028                                                                                                                               | Membrane-associated guanylate kinase, WW and PDZ domain-containing protein 1 (BAP-1-associated protein 1) (BAP-1) (Membrane-associated guanylate kinase inverted 1) (MAGI-1) (Atrophin-1-interacting protein 3) (AIP3) (WW domain-containing protein 3) (WWP3) (Trinucleotide repeat containing gene 19 protein)                                                                                                                                           | GO:0005524; GO:0007155; GO:0007166; GO:0008022; GO:0006461; GO:0005923                                                                                                                                                                                                                                                                                                                                                                                                                                                                                                                                                                                                                                                                                                                                                                                                                                                                                                                                                                                                                                                                                                                                                                                                                                                                                            | ATP binding; cell adhesion; cell surface receptor linked signal transduction; protein C-terminus binding; protein complex assembly; tight junction                                                                                                                                                                                                                                                                                                                    | Celljunctiontightjunction             | Known in Uniprot to be phosphorylated |                                       |          |
| 1280         | MGR2         | MGR2_HUMAN  | MGR2; Q86YG3; GRM2; B0MK07   | Q14416; Q14CUG; Q52MCE; Q9I3N6; B0MK07; Q86YG3                                                | NP_000830; NP_001123                                                                                                                               | Metabotropic glutamate receptor 2 (mGluR2); Similar to glutamate receptor, metabotropic 2 (Fragment)                                                                                                                                                                                                                                                                                                                                                       | GO:0004930; GO:0007186; GO:0008066; GO:0005887; GO:0007194; GO:0007268; GO:0030424; GO:0014047; GO:0016021; GO:0005622; GO:0005886; GO:0001989; GO:0005615; GO:0019966; GO:0001959; GO:0005634; GO:0031093; GO:0012960; GO:0004867; GO:0043120; GO:0006633; GO:0005739; GO:0051114; GO:0018166; GO:0008270                                                                                                                                                                                                                                                                                                                                                                                                                                                                                                                                                                                                                                                                                                                                                                                                                                                                                                                                                                                                                                                        | G-protein coupled receptor activity; G-protein coupled receptor protein signaling pathway; glutamate receptor activity; integral to plasma membrane; negative regulation of adenylyl cyclase activity; synaptic transmission; axon; glutamate secretion; integral to membrane; intracellular; plasma membrane; presynaptic membrane                                                                                                                                   | Cellmembrane                          | Multipas                              |                                       |          |
| 1281         | AZMG         | AZMG_HUMAN  | AZMG                         | P01023; Q13677; Q59F47; Q5QTS0; Q68DN2; Q6PIY3; Q6PN97                                        | NP_000005                                                                                                                                          | Alpha-2-macroglobulin (Alpha-2-M) (C3 and PZP-like alpha-2-macroglobulin domain-containing protein 5)                                                                                                                                                                                                                                                                                                                                                      | GO:0005886; GO:0001989; GO:0005615; GO:0019966; GO:0001959; GO:0005634; GO:0031093; GO:0012960; GO:0004867; GO:0043120; GO:0006633; GO:0005739; GO:0051114; GO:0018166; GO:0008270                                                                                                                                                                                                                                                                                                                                                                                                                                                                                                                                                                                                                                                                                                                                                                                                                                                                                                                                                                                                                                                                                                                                                                                | enzyme binding; extracellular space; interleukin-1 binding; interleukin-8 binding; nucleus; platelet alpha granule lumen; protein homodimerization; serine-type endopeptidase inhibitor activity; tumor necrosis factor binding; wide-spectrum protease inhibitor activity                                                                                                                                                                                            | Secreted                              |                                       |                                       |          |
| 1282         | MECR         | MECR_HUMAN  | MECR                         | Q98V79; Q55U0V; Q55YU1; Q55YU2; Q6IBU9; Q91372                                                | NP_057095                                                                                                                                          | Trans-2-enoyl-CoA reductase, mitochondrial (HsNrbf-1) (EC 1.3.1.38) (NRBF-1)                                                                                                                                                                                                                                                                                                                                                                               | GO:0005794; GO:0003779; GO:0005634; GO:0005886; GO:0008091; GO:0001525; GO:0005509; GO:0004056; GO:0005125; GO:0043542; GO:0004845; GO:0005615; GO:0005930; GO:0006954; GO:0043066; GO:0001937; GO:0001938; GO:0009306                                                                                                                                                                                                                                                                                                                                                                                                                                                                                                                                                                                                                                                                                                                                                                                                                                                                                                                                                                                                                                                                                                                                            | fatty acid biosynthetic process; mitochondrion; oxidation reduction; trans-2-enoyl-CoA reductase (NADPH) activity; zinc ion binding                                                                                                                                                                                                                                                                                                                                   | Mitochondrion                         |                                       |                                       |          |
| 1283         | GCV3         | GCV3_HUMAN  | GCV3                         | Q02188; Q43843; Q87AH3                                                                        | NP_000847; NP_001124                                                                                                                               | Guanylate cyclase soluble subunit alpha-3 (GCS-alpha-3) (EC 4.6.1.2) (Soluble guanylate cyclase large subunit) (GCS-alpha-1)                                                                                                                                                                                                                                                                                                                               | GO:0004833; GO:0008074; GO:0007263; GO:0004872                                                                                                                                                                                                                                                                                                                                                                                                                                                                                                                                                                                                                                                                                                                                                                                                                                                                                                                                                                                                                                                                                                                                                                                                                                                                                                                    | guanylate cyclase activity; guanylate cyclase complex, soluble; nitric oxide mediated signal transduction; receptor activity                                                                                                                                                                                                                                                                                                                                          | Cytoplasm                             |                                       |                                       |          |
| 1284         | SODM         | SODM_HUMAN  | SODM; B2R781                 | P04179; P78134; Q16792; Q5TCH1; Q9KEE6; Q9P223; B2R781                                        | NP_000627; NP_001019                                                                                                                               | Superoxide dismutase [Mn], mitochondrial (EC 1.15.1.1)                                                                                                                                                                                                                                                                                                                                                                                                     | GO:0001315; GO:0003010; GO:0005759; GO:0043524; GO:0032384; GO:0005515; GO:0006357; GO:0001836; GO:0019430; GO:0003033; GO:0004784; GO:0003069                                                                                                                                                                                                                                                                                                                                                                                                                                                                                                                                                                                                                                                                                                                                                                                                                                                                                                                                                                                                                                                                                                                                                                                                                    | age-dependent response to reactive oxygen species; manganese ion binding; mitochondrial matrix; negative regulation of neuron apoptosis; oxygen homeostasis; protein binding; regulation of transcription from RNA polymerase II promoter; release of cytochrome c from mitochondria; removal of superoxide radicals; response to superoxide; superoxide dismutase activity; vasodilation by acetylcholine involved in regulation of systemic arterial blood pressure | Mitochondrionmatrix                   |                                       |                                       |          |
| 1285         | SPTB1        | SPTB1_HUMAN | Q59FP5; SPTB1                | Q59FP5; P11277; Q15510; Q15519                                                                | NP_000338; NP_001020                                                                                                                               | Spectrin, beta, erythrocytic (Includes spherocytosis, clinical type 1) variant (Fragment)                                                                                                                                                                                                                                                                                                                                                                  | GO:0005794; GO:0003779; GO:0005634; GO:0005886; GO:0008091; GO:0001525; GO:0005509; GO:0004056; GO:0005125; GO:0043542; GO:0004845; GO:0005615; GO:0005930; GO:0006954; GO:0043066; GO:0001937; GO:0001938; GO:0009306                                                                                                                                                                                                                                                                                                                                                                                                                                                                                                                                                                                                                                                                                                                                                                                                                                                                                                                                                                                                                                                                                                                                            | Golgi apparatus; actin binding; nucleus; plasma membrane; spectrin; structural constituent of cytoskeleton                                                                                                                                                                                                                                                                                                                                                            | Known in Uniprot to be phosphorylated |                                       |                                       |          |
| 1286         | SCG2         | SCG2_HUMAN  | SCG2; B2R662                 | Q57T11; P13521; Q87BH3; B2R662                                                                | NP_003460                                                                                                                                          | Secretogranin-2 (Secretogranin II) (SgII) (Chromogranin-C) [Cleaved into: Secretoneurin (SN)]                                                                                                                                                                                                                                                                                                                                                              | GO:0001525; GO:0005509; GO:0004056; GO:0005125; GO:0043542; GO:0004845; GO:0005615; GO:0005930; GO:0006954; GO:0043066; GO:0001937; GO:0001938; GO:0009306                                                                                                                                                                                                                                                                                                                                                                                                                                                                                                                                                                                                                                                                                                                                                                                                                                                                                                                                                                                                                                                                                                                                                                                                        | MAPKKK cascade; angiogenesis; calcium ion binding; chemoattractant activity; cytokine activity; endothelial cell migration; eosinophil chemotaxis; extracellular space; induction of positive chemotaxis; inflammatory response; negative regulation of apoptosis; negative regulation of endothelial cell proliferation; positive regulation of endothelial cell proliferation; protein secretion                                                                    | Secreted                              | Known in Uniprot to be phosphorylated |                                       |          |
| 1287         | PSA7L        | PSA7L_HUMAN | PSA7L; B0Y375                | Q8TAA3; Q8TAA4; Q8TAA8; Q8TAA2; B0Y375                                                        | NP_653263; NP_001020                                                                                                                               | Proteasome subunit alpha type-7-like (EC 3.4.25.1)                                                                                                                                                                                                                                                                                                                                                                                                         | GO:0001222; GO:0005829; GO:0005634; GO:0005839; GO:0006886; GO:0001937; GO:0001938; GO:0009306                                                                                                                                                                                                                                                                                                                                                                                                                                                                                                                                                                                                                                                                                                                                                                                                                                                                                                                                                                                                                                                                                                                                                                                                                                                                    | cytosol; nucleus; proteasome core complex; threonine-type endopeptidase activity; ubiquitin-dependent protein catabolic process                                                                                                                                                                                                                                                                                                                                       | CytoplasmNucleus                      |                                       |                                       |          |
| 1288         | ZMYM6        | ZMYM6_HUMAN | Q69Y4; Q55W00; Q13Q23; ZMYM6 | Q55W01; Q69Y4; Q55W00; Q95789; B4DRJ6; Q12Q23; Q4C108; Q55VZ9; Q55W00; Q95Y01; Q9NWF1; Q9P234 | NP_009098                                                                                                                                          | Zinc finger MYM-type protein 6 (Zinc finger protein 258)                                                                                                                                                                                                                                                                                                                                                                                                   | GO:0003677; GO:0007275; GO:0005634; GO:0008270                                                                                                                                                                                                                                                                                                                                                                                                                                                                                                                                                                                                                                                                                                                                                                                                                                                                                                                                                                                                                                                                                                                                                                                                                                                                                                                    | DNA binding; multicellular organismal development; nucleus; zinc ion binding                                                                                                                                                                                                                                                                                                                                                                                          | Known in Uniprot to be phosphorylated |                                       |                                       |          |
| 1289         | TM16F        | TM16F_HUMAN | TM16F; ANO6; B3KX12          | Q44KQ2; AGNM6; Q8N322; B3KX12                                                                 | XP_113743; NP_0010205                                                                                                                              | Anoctamin-6 (Transmembrane protein 16F)                                                                                                                                                                                                                                                                                                                                                                                                                    | GO:0005509; GO:0005254; GO:0031404; GO:0016021; GO:0006811                                                                                                                                                                                                                                                                                                                                                                                                                                                                                                                                                                                                                                                                                                                                                                                                                                                                                                                                                                                                                                                                                                                                                                                                                                                                                                        | calcium ion binding; chloride channel activity; chloride ion binding; integral to membrane; ion transport                                                                                                                                                                                                                                                                                                                                                             | Membrane                              | Multipas                              |                                       |          |
| 1290         | AP2S1        | AP2S1_HUMAN | AP2S1; B2R424                | P53680; Q75977; Q6PK67; B2R424                                                                | NP_004060; NP_005786                                                                                                                               | AP-2 complex subunit sigma-1 (Adapter-related protein complex 2 sigma-1 subunit) (Sigma2-adapter) (Plasma membrane adaptor AP-2 17 kDa protein) (HA2 17 kDa subunit) (Clathrin assembly protein 2 small chain) (Clathrin coat assembly protein AP17) (Clathrin coat-associated protein AP17)                                                                                                                                                               | GO:0001222; GO:0005829; GO:0005634; GO:0005839; GO:0006886; GO:0001937; GO:0001938; GO:0009306                                                                                                                                                                                                                                                                                                                                                                                                                                                                                                                                                                                                                                                                                                                                                                                                                                                                                                                                                                                                                                                                                                                                                                                                                                                                    | AP-2 adaptor complex; clathrin coat assembly; cytosol; intracellular protein transport; protein binding; protein transporter activity; regulation of defense response to virus by virus; regulation of endocytosis                                                                                                                                                                                                                                                    | Cellmembrane                          | MembranePeripheral                    | Known in Uniprot to be phosphorylated |          |
| 1291         | ECH1         | ECH1_HUMAN  | ECH1                         | Q13011; Q8WV00; Q96E29                                                                        | NP_001389                                                                                                                                          | Delta(3,5)-Delta(2,4)-dienoyl-CoA isomerase, mitochondrial (EC 5.3.3.-)                                                                                                                                                                                                                                                                                                                                                                                    | GO:0004300; GO:0006635; GO:0006691; GO:0016853; GO:0005739; GO:0005777; GO:0005515                                                                                                                                                                                                                                                                                                                                                                                                                                                                                                                                                                                                                                                                                                                                                                                                                                                                                                                                                                                                                                                                                                                                                                                                                                                                                | enoyl-CoA hydratase activity; fatty acid beta-oxidation; generation of precursor metabolites and energy; isomerase activity; mitochondrion; peroxisome; protein binding                                                                                                                                                                                                                                                                                               | MitochondrionPeroxisome               | Known in Uniprot to be phosphorylated |                                       |          |



| Protein Name | Uniprot Name | Other Names           | Uniprot Ids                                                                                            | Refseq IDs                       | Protein Description                                                                                                                                                                                                                                                             | GO ID                                                                                                                                                                                                                                                                                                                                                                                                                                                                                                                                                                  | GO terms                                                                                                                                                                                                                                                                                                                                                                                                                                                                                                                                                                                                                                                                                                                                                                                                                                                                                                                                                                                                                                                                                                                                                                                                             | Subcellular location                                        | Comments | Comments - Database Search | Comments - Database Search | Function |
|--------------|--------------|-----------------------|--------------------------------------------------------------------------------------------------------|----------------------------------|---------------------------------------------------------------------------------------------------------------------------------------------------------------------------------------------------------------------------------------------------------------------------------|------------------------------------------------------------------------------------------------------------------------------------------------------------------------------------------------------------------------------------------------------------------------------------------------------------------------------------------------------------------------------------------------------------------------------------------------------------------------------------------------------------------------------------------------------------------------|----------------------------------------------------------------------------------------------------------------------------------------------------------------------------------------------------------------------------------------------------------------------------------------------------------------------------------------------------------------------------------------------------------------------------------------------------------------------------------------------------------------------------------------------------------------------------------------------------------------------------------------------------------------------------------------------------------------------------------------------------------------------------------------------------------------------------------------------------------------------------------------------------------------------------------------------------------------------------------------------------------------------------------------------------------------------------------------------------------------------------------------------------------------------------------------------------------------------|-------------------------------------------------------------|----------|----------------------------|----------------------------|----------|
| 1318 MD12L   | MD12L_HUMAN  | QB6Y9V; MD12L         | Q85Y9V; Q96PC7; Q96PC8; Q96RMS; Q96RCD7; Q96J69                                                        | NP_443728                        | Mediator of RNA polymerase II transcription subunit 12-like protein (Mediator complex subunit 12-like protein) (Thyroid hormone receptor-associated-like protein) (Trinucleotide repeat-containing gene 11 protein-like)                                                        | GO:0005634; GO:0006355; GO:0030528                                                                                                                                                                                                                                                                                                                                                                                                                                                                                                                                     | nucleus; regulation of transcription, DNA-dependent; transcription regulator activity                                                                                                                                                                                                                                                                                                                                                                                                                                                                                                                                                                                                                                                                                                                                                                                                                                                                                                                                                                                                                                                                                                                                | Nucleus                                                     |          | Known in Uniprot           | to be phosphorylated       |          |
| 1319 SCN4A   | SCN4A_HUMAN  | SCN4A                 | P33499; Q15478; Q15447; Q72681                                                                         | NP_000325                        | Sodium channel protein type 4 subunit alpha (Sodium channel protein type IV subunit alpha) (Voltage-gated sodium channel subunit alpha Nav1.4) (Sodium channel protein skeletal muscle subunit alpha) (SKM1)                                                                    | GO:0005936; GO:0031402; GO:0006814; GO:0005246; GO:0001518                                                                                                                                                                                                                                                                                                                                                                                                                                                                                                             | muscle contraction; sodium ion binding; sodium ion transport; voltage-gated sodium channel activity; voltage-gated sodium channel complex                                                                                                                                                                                                                                                                                                                                                                                                                                                                                                                                                                                                                                                                                                                                                                                                                                                                                                                                                                                                                                                                            | MembraneMultipassmembraneprotein                            |          | Known in Uniprot           | to be phosphorylated       |          |
| 1320 TDRD4   | TDRD4_HUMAN  | TDRD4; Q57239; RNF17  | Q98X78; Q98Y9V; Q57239; Q691W3; Q98X77                                                                 | NP_112567                        | RING finger protein 17 (Tudor domain-containing protein 4)                                                                                                                                                                                                                      | GO:0005737; GO:0016788; GO:0007275; GO:0003076; GO:0005634; GO:0008270                                                                                                                                                                                                                                                                                                                                                                                                                                                                                                 | cytoplasm; hydrolase activity, acting on ester bonds; multicellular organismal development; nucleic acid binding; nucleus; zinc ion binding                                                                                                                                                                                                                                                                                                                                                                                                                                                                                                                                                                                                                                                                                                                                                                                                                                                                                                                                                                                                                                                                          | CytoplasmNucleus                                            |          |                            |                            |          |
| 1321 RPIA    | RPIA_HUMAN   | RPIA                  | P49247; Q541P9; Q96B16                                                                                 | NP_653164                        | Ribose-5-phosphate isomerase (EC 5.3.1.6) (Phosphoriboisomerase)                                                                                                                                                                                                                | GO:0005829; GO:0009052; GO:0004751                                                                                                                                                                                                                                                                                                                                                                                                                                                                                                                                     | cytosol; pentose-phosphate shunt, non-oxidative branch; ribose-5-phosphate isomerase activity                                                                                                                                                                                                                                                                                                                                                                                                                                                                                                                                                                                                                                                                                                                                                                                                                                                                                                                                                                                                                                                                                                                        | Secreted                                                    |          |                            |                            |          |
| 1322 U773    | U773_HUMAN   | U773; ZG16B           | Q96DA0; A66171; B2R4F6; Q6UW28                                                                         | NP_660295                        | Zymogen granule protein 16 homolog B                                                                                                                                                                                                                                            | GO:0005576; GO:0005529                                                                                                                                                                                                                                                                                                                                                                                                                                                                                                                                                 | extracellular region; sugar binding                                                                                                                                                                                                                                                                                                                                                                                                                                                                                                                                                                                                                                                                                                                                                                                                                                                                                                                                                                                                                                                                                                                                                                                  | Secreted                                                    |          |                            |                            |          |
| 1323 HCDH    | HCDH_HUMAN   | HCDH                  | Q00324; Q00397; Q00753                                                                                 | NP_005318                        | Hydroxyacyl-coenzyme A dehydrogenase, mitochondrial (HCDH) (EC 1.1.1.35) (Short chain 3-hydroxyacyl-CoA dehydrogenase) (Medium and short chain L-3-hydroxyacyl-coenzyme A dehydrogenase)                                                                                        | GO:0003857; GO:0005662; GO:0006631; GO:0005759; GO:0005514                                                                                                                                                                                                                                                                                                                                                                                                                                                                                                             | 3-hydroxyacyl-CoA dehydrogenase activity; coenzyme binding; fatty acid metabolic process; mitochondrial matrix; oxidation reduction                                                                                                                                                                                                                                                                                                                                                                                                                                                                                                                                                                                                                                                                                                                                                                                                                                                                                                                                                                                                                                                                                  | Mitochondrionmatrix                                         |          |                            |                            |          |
| 1324 RUFY1   | RUFY1_HUMAN  | RUFY1                 | Q96T51; Q95FF3; Q71593; Q916I3                                                                         | NP_079434; NP_001035; NP_0010355 | RUN and FYVE domain-containing protein 1 (FYVE-finger protein EPI) (Zinc finger FYVE domain-containing protein 12) (La-binding protein 1) (Rab4-intersecting protein)                                                                                                           | GO:0031901; GO:0006897; GO:0008289; GO:0015031; GO:0008270                                                                                                                                                                                                                                                                                                                                                                                                                                                                                                             | early endosome membrane; endocytosis; lipid binding; protein transport; zinc ion binding                                                                                                                                                                                                                                                                                                                                                                                                                                                                                                                                                                                                                                                                                                                                                                                                                                                                                                                                                                                                                                                                                                                             | CytoplasmEarlyendosome membranePeripheralmembraneprotein    |          | Known in Uniprot           | to be phosphorylated       |          |
| 1325 HPSE    | HPSE_HUMAN   | HPSE                  | Q9Y251; Q53050; Q9UL39                                                                                 | NP_006656; NP_001092             | Heparanase (EC 3.2.-.2) (Heparanase-1) (Hpa1) (Endo-glucuronidase) (Cleared into: Heparanase 8 kDa subunit; Heparanase 50 kDa subunit)                                                                                                                                          | GO:0004566; GO:0005909; GO:0005576; GO:0005765; GO:0000387; GO:0004177; GO:0019889; GO:0005929; GO:0005788; GO:0005789; GO:0005790; GO:0016021; GO:0005886; GO:0001666; GO:0005525; GO:0003924; GO:0001039; GO:0015031; GO:0006890; GO:0007264; GO:0003824; GO:0008152; GO:0005777                                                                                                                                                                                                                                                                                     | beta-glucuronidase activity; calcium ion binding; extracellular region; lysosomal membrane; magnesium ion binding; proteoglycan metabolic process                                                                                                                                                                                                                                                                                                                                                                                                                                                                                                                                                                                                                                                                                                                                                                                                                                                                                                                                                                                                                                                                    | LysosomemembranePeripheralmembraneprotein                   |          |                            |                            |          |
| 1326 ARTS1   | ARTS1_HUMAN  | ARTS1; ERAP1          | Q9N208; Q6UW76; Q6UW75; Q8NEL4; Q8TAD0; Q9UHF8; Q9UKY2                                                 | NP_057526; NP_001035             | Endoplasmic reticulum aminopeptidase 1 (EC 3.4.11.-) (Adipocyte-derived leucine aminopeptidase) (A-LAP) (ARTS-1) (Aminopeptidase PLS) (Puromycin-insensitive leucyl-specific aminopeptidase) (PLS-AP) (Type 1 tumor necrosis factor receptor shedding aminopeptidase regulator) | GO:0003779; GO:0015629; GO:0030036; GO:0030154; GO:0007016; GO:0016021; GO:0005634; GO:0007165; GO:0003924; GO:0001039; GO:0015031; GO:0006890; GO:0007264; GO:0003824; GO:0008152; GO:0005777                                                                                                                                                                                                                                                                                                                                                                         | aminopeptidase activity; antigen processing and presentation of endogenous peptide antigen via MHC class I; cytosol; endoplasmic reticulum lumen; endoplasmic reticulum membrane; extracellular region; fat cell differentiation; integral to membrane; interleukin-1, type II receptor binding; interleukin-6 receptor binding; membrane protein ectodomain proteolysis; metalloprotease activity; regulation of blood pressure; regulation of innate immune response; response to bacterium; zinc ion binding                                                                                                                                                                                                                                                                                                                                                                                                                                                                                                                                                                                                                                                                                                      | Endoplasmicreticulum membraneSinglepassyptinmembraneprotein |          |                            |                            |          |
| 1327 ITPR2   | ITPR2_HUMAN  | ITPR2                 | Q14571; Q94773                                                                                         | NP_002214                        | Inositol 1,4,5-trisphosphate receptor type 2 (Type 2 inositol 1,4,5-trisphosphate receptor) (Type 2 INSP3 receptor) (IP3 receptor isoform 2) (InsP3R2)                                                                                                                          | GO:0005909; GO:0006816; GO:0005789; GO:0005200; GO:0008095; GO:0016021; GO:0005886; GO:0001666; GO:0005525; GO:0003924; GO:0001039; GO:0015031; GO:0006890; GO:0007264; GO:0003824; GO:0008152; GO:0005777                                                                                                                                                                                                                                                                                                                                                             | calcium ion binding; calcium ion transmembrane transport activity; calcium ion transport; endoplasmic reticulum membrane; inositol 1,4,5-trisphosphate-sensitive calcium-release channel activity; inositol-1,4,5-trisphosphate receptor activity; integral to membrane; plasma membrane; response to hypoxia; signal transduction                                                                                                                                                                                                                                                                                                                                                                                                                                                                                                                                                                                                                                                                                                                                                                                                                                                                                   | Endoplasmicreticulum membraneMultipassmembraneprotein       |          | Known in Uniprot           | to be phosphorylated       |          |
| 1328 RAB6B   | RAB6B_HUMAN  | RAB6B; B2R5Z9; Q6AZ91 | Q6AZ91; Q9NRW1; B2R5Z9                                                                                 | NP_057661                        | Ras-related protein Rab-6B                                                                                                                                                                                                                                                      | GO:0005525; GO:0003924; GO:0001039; GO:0015031; GO:0006890; GO:0007264; GO:0003824; GO:0008152; GO:0005777                                                                                                                                                                                                                                                                                                                                                                                                                                                             | GTP binding; GTPase activity; Golgi membrane; protein transport; retrograde vesicle-mediated transport; Golgi to ER; small GTPase mediated signal transduction                                                                                                                                                                                                                                                                                                                                                                                                                                                                                                                                                                                                                                                                                                                                                                                                                                                                                                                                                                                                                                                       | Golgiapparatusmembrane lipidanchord                         |          |                            |                            |          |
| 1329 ISOC1   | ISOC1_HUMAN  | ISOC1; Q9Y385         | Q9Y385; Q96C77; Q7Z770                                                                                 | NP_057132                        | Isocorismatase domain-containing protein 1                                                                                                                                                                                                                                      | GO:0003779; GO:0015629; GO:0030036; GO:0030154; GO:0007016; GO:0016021; GO:0005634; GO:0007165; GO:0003924; GO:0001039; GO:0015031; GO:0006890; GO:0007264; GO:0003824; GO:0008152; GO:0005777                                                                                                                                                                                                                                                                                                                                                                         | actin binding; actin cytoskeleton; actin cytoskeleton organization; cell differentiation; cytoplasm; cytoskeletal anchoring at plasma membrane; integral to membrane; nucleus; signal transduction; skeletal muscle tissue development                                                                                                                                                                                                                                                                                                                                                                                                                                                                                                                                                                                                                                                                                                                                                                                                                                                                                                                                                                               | CytoplasmcellcortexCytoactinmembraneprotein                 |          | Known in Uniprot           | to be phosphorylated       |          |
| 1330 FLNB    | FLNB_HUMAN   | FLNB; Q60E77; B2Z2B5  | Q60E77; Q59E22; Q6M211; Q9UKY8; Q8WXT0; Q8WXT1; Q8WXT2; Q9NR85; Q9NT26; Q9UEV9; B2Z2B5; Q60E77         | NP_001448                        | Filamin-B (FLN-B) (Beta-filamin) (Actin-binding-like protein) (Thyroid autoantigen) (Truncated actin-binding protein) (Truncated ABP) (ABP-280 homolog) (ABP-278) (Filamin 3) (Filamin homolog 1) (Fh1); Filamin B                                                              | GO:0003779; GO:0015629; GO:0030036; GO:0030154; GO:0007016; GO:0016021; GO:0005634; GO:0007165; GO:0003924; GO:0001039; GO:0015031; GO:0006890; GO:0007264; GO:0003824; GO:0008152; GO:0005777                                                                                                                                                                                                                                                                                                                                                                         | actin binding; actin cytoskeleton; actin cytoskeleton organization; cell differentiation; cytoplasm; cytoskeletal anchoring at plasma membrane; integral to membrane; nucleus; signal transduction; skeletal muscle tissue development                                                                                                                                                                                                                                                                                                                                                                                                                                                                                                                                                                                                                                                                                                                                                                                                                                                                                                                                                                               | CytoplasmcellcortexCytoactinmembraneprotein                 |          | Known in Uniprot           | to be phosphorylated       |          |
| 1331 APOB    | APOB_HUMAN   | APOB; Q95H83; Q7Z7Q0  | P04114; Q00502; P78480; P78481; Q13775; Q13785; Q13786; Q13787; Q13788; Q72600; Q9UJND; Q59H83; Q7Z7Q0 | NP_000375                        | Apolipoprotein B-100 (Apo B-100) (Cleared into: Apolipoprotein B-48 (Apo B-48)); Apolipoprotein B variant (Fragment); APOB protein                                                                                                                                              | GO:0042632; GO:0030301; GO:0017127; GO:0034360; GO:0030669; GO:0005788; GO:0031904; GO:0010008; GO:0008021; GO:0034363; GO:0034362; GO:0034363; GO:0034374; GO:0005750; GO:0005792; GO:0005943; GO:0005886; GO:0010744; GO:0045834; GO:0046982; GO:0034361; GO:0034379; GO:0048844; GO:0042632; GO:0005788; GO:0009566; GO:0001701; GO:0042158; GO:0042159; GO:0042953; GO:0007399; GO:0009791; GO:0045540; GO:0030317; GO:0016621; GO:0007261; GO:0047555; GO:0016620; GO:0007603; GO:0008234; GO:0005634; GO:0042211; GO:0005611; GO:0008234; GO:0006955; GO:0019941 | cholesterol homeostasis; cholesterol transport; cholesterol transporter activity; chylomicron remnant; clathrin-coated endocytic vesicle membrane; endoplasmic reticulum lumen; endosome lumen; endosome membrane; heparin binding; intermediate-density lipoprotein particle; low-density lipoprotein particle; low-density lipoprotein particle clearance; low-density lipoprotein particle remodeling; low-density lipoprotein receptor binding; mature chylomicron; microsome; phospholipid binding; plasma membrane; positive regulation of foam cell differentiation; positive regulation of lipid metabolic process; protein heterodimerization activity; very-low-density lipoprotein particle; very-low-density lipoprotein particle assembly; artery morphogenesis; cholesterol homeostasis; endoplasmic reticulum; fertilization; in utero embryonic development; lipoprotein biosynthetic process; lipoprotein catabolic process; lipoprotein transport; nervous system development; post-embryonic development; regulation of cholesterol biosynthetic process; sperm motility; spermatogenesis; triglyceride catabolic process; triglyceride mobilization; lipid transport; lipid transporter activity | Secreted;                                                   |          | Known in Uniprot           | to be phosphorylated       |          |
| 1332 PDE6B   | PDE6B_HUMAN  | PDE6B                 | P35913; P35914; Q98W85; Q98W87; B2Z0W3                                                                 | NP_000274; NP_001138             | Rod cGMP-specific 3',5'-cyclic phosphodiesterase subunit beta (GMP-PDE beta) (EC 3.1.4.35)                                                                                                                                                                                      | GO:0047555; GO:0016620; GO:0007603; GO:0008234; GO:0005634; GO:0042211; GO:0005611; GO:0008234; GO:0006955; GO:0019941                                                                                                                                                                                                                                                                                                                                                                                                                                                 | 3',5'-cyclic-GMP phosphodiesterase activity; membrane photoreduction; visible light; signal transduction                                                                                                                                                                                                                                                                                                                                                                                                                                                                                                                                                                                                                                                                                                                                                                                                                                                                                                                                                                                                                                                                                                             | MembraneLipidanchord                                        |          |                            |                            |          |
| 1333 UBPA4   | UBPA4_HUMAN  | UBPA4                 | Q9H0E7; B2Z0W3                                                                                         | NP_115523                        | Ubiquitin carboxyl-terminal hydrolase 44 (EC 3.1.2.15) (Ubiquitin thioesterase 44) (Deubiquitinating enzyme 44)                                                                                                                                                                 | GO:0005737; GO:0008234; GO:0006955; GO:0019941                                                                                                                                                                                                                                                                                                                                                                                                                                                                                                                         | cysteine-type peptidase activity; immune response; modification-dependent protein catabolic process                                                                                                                                                                                                                                                                                                                                                                                                                                                                                                                                                                                                                                                                                                                                                                                                                                                                                                                                                                                                                                                                                                                  |                                                             |          |                            |                            |          |
| 1334 OTUB1   | OTUB1_HUMAN  | OTUB1; B3KUV5         | Q96FW1; Q32Q78; Q96I13; Q9NXQ4; Q9P0B8; B3KUV5                                                         | NP_060140                        | Ubiquitin thioesterase OTUB1 (EC 3.1.2.-) (Otuban-1) (OTU domain-containing ubiquitin aldehyde-binding protein 1) (Ubiquitin-specific-processing protease OTUB1) (Deubiquitinating enzyme OTUB1)                                                                                | GO:0005737; GO:0008234; GO:0006955; GO:0019941                                                                                                                                                                                                                                                                                                                                                                                                                                                                                                                         | cysteine-type peptidase activity; immune response; modification-dependent protein catabolic process                                                                                                                                                                                                                                                                                                                                                                                                                                                                                                                                                                                                                                                                                                                                                                                                                                                                                                                                                                                                                                                                                                                  |                                                             |          | Known in Uniprot           | to be phosphorylated       |          |
| 1335 SYAC    | SYAC_HUMAN   | SYAC                  | P49588; A6M14; Q53CV7; Q96FA0                                                                          | NP_001596                        | Alanyl-tRNA synthetase, cytoplasmic (EC 6.1.1.7) (Alanine--tRNA ligase) (AlaRS) (Renal carcinoma antigen RYR-42)                                                                                                                                                                | GO:0005524; GO:0004813; GO:0006419; GO:0005737; GO:0005625; GO:0003030; GO:0009986; GO:0005813; GO:0005829; GO:0042462; GO:0006470; GO:0005515; GO:0005001; GO:0001501; GO:0016563; GO:0005813                                                                                                                                                                                                                                                                                                                                                                         | ATP binding; alanine-tRNA ligase activity; alanyl-tRNA aminoacylation; cytoplasm; soluble fraction; tRNA binding                                                                                                                                                                                                                                                                                                                                                                                                                                                                                                                                                                                                                                                                                                                                                                                                                                                                                                                                                                                                                                                                                                     | Cytoplasm                                                   |          | Known in Uniprot           | to be phosphorylated       |          |
| 1336 CE290   | CE290_HUMAN  | CE290; Q0S816         | Q66G58; Q15078; Q15K50; Q916G6; Q916G7; Q916H0; Q0S816                                                 | NP_079390                        | Centrosomal protein of 290 kDa (Cep290) (Nephrocystin-6) (Tumor antigen se2-2) (Cancer/testis antigen 87) (CT87); CEP290 protein                                                                                                                                                | GO:0005625; GO:0003030; GO:0009986; GO:0005813; GO:0005829; GO:0042462; GO:0006470; GO:0005515; GO:0005001; GO:0001501; GO:0016563; GO:0005813                                                                                                                                                                                                                                                                                                                                                                                                                         | cell projection organization; cell surface; centrosome; cytosol; eye photoreceptor cell development; hindbrain development; nucleus; otic vesicle formation; photoreceptor connecting cilium; pro-neurogenesis development; protein binding; protein transport; transcription activator activity; centrosome                                                                                                                                                                                                                                                                                                                                                                                                                                                                                                                                                                                                                                                                                                                                                                                                                                                                                                         | CentrosomeNucleusCell projectioncilium                      |          | Known in Uniprot           | to be phosphorylated       |          |
| 1337 SUCA    | SUCA_HUMAN   | SUCA                  | P53597; Q9UNP6                                                                                         | NP_003840                        | Succinyl-CoA ligase (GDP-forming) subunit alpha, mitochondrial (EC 6.2.1.4) (Succinyl-CoA synthetase subunit alpha) (SCS-alpha)                                                                                                                                                 | GO:0003878; GO:0005525; GO:0005759; GO:0004775; GO:0004776; GO:0007165; GO:0005887; GO:0006470; GO:0005515; GO:0005001; GO:0007185                                                                                                                                                                                                                                                                                                                                                                                                                                     | ATP citrate synthase activity; GTP binding; mitochondrial matrix; succinate-CoA ligase (ADP-forming) activity; succinate-CoA ligase (GDP-forming) activity; tricarboxylic acid cycle cell adhesion; integral to plasma membrane; protein amino acid dephosphorylation; protein binding; transmembrane receptor protein tyrosine phosphatase activity; transmembrane receptor protein tyrosine phosphatase signaling pathway                                                                                                                                                                                                                                                                                                                                                                                                                                                                                                                                                                                                                                                                                                                                                                                          | Mitochondrion                                               |          | Known in Uniprot           | to be phosphorylated       |          |
| 1338 PTRF    | PTRF_HUMAN   | PTRF; Q86W50; Q57022  | P10586; Q57021; Q57022; Q59W92; Q86W50                                                                 | NP_002831; NP_569707             | Receptor-type tyrosine-protein phosphatase F (EC 2.7.1.48) (Leucocyte common antigen related) (LAK)                                                                                                                                                                             | GO:0007165; GO:0005887; GO:0006470; GO:0005515; GO:0005001; GO:0007185                                                                                                                                                                                                                                                                                                                                                                                                                                                                                                 | cell adhesion; integral to plasma membrane; protein amino acid dephosphorylation; protein binding; transmembrane receptor protein tyrosine phosphatase activity; transmembrane receptor protein tyrosine phosphatase signaling pathway                                                                                                                                                                                                                                                                                                                                                                                                                                                                                                                                                                                                                                                                                                                                                                                                                                                                                                                                                                               | MembraneSinglepassyptinmembraneprotein                      |          | Known in HPRD              | to be phosphorylated       |          |

| Protein Name | Uniprot Name | Other Names            | Uniprot ID                                                                                                   | Refseq IDs                       | Protein Description                                                                                                                                                                                                                                                                                                                                                                                              | GO ID                                                                                                                                                                                                                                                                                          | GO terms                                                                                                                                                                                                                                                                                                                                                                                                                                                                                                                                                                                                                                                                                                                                                                                                                                                                                                | Subcellular location                                | Comments                              | Comments - Database Search            | Comments - Database Search         | Function |
|--------------|--------------|------------------------|--------------------------------------------------------------------------------------------------------------|----------------------------------|------------------------------------------------------------------------------------------------------------------------------------------------------------------------------------------------------------------------------------------------------------------------------------------------------------------------------------------------------------------------------------------------------------------|------------------------------------------------------------------------------------------------------------------------------------------------------------------------------------------------------------------------------------------------------------------------------------------------|---------------------------------------------------------------------------------------------------------------------------------------------------------------------------------------------------------------------------------------------------------------------------------------------------------------------------------------------------------------------------------------------------------------------------------------------------------------------------------------------------------------------------------------------------------------------------------------------------------------------------------------------------------------------------------------------------------------------------------------------------------------------------------------------------------------------------------------------------------------------------------------------------------|-----------------------------------------------------|---------------------------------------|---------------------------------------|------------------------------------|----------|
| 1339 BDP1    | BDP1_HUMAN   | Q9C0H4; BDP1           | Q9C0H4; Q9C0H4; AGH8Y1; Q680S6; Q680Y5; Q64ZL3; Q6PM7; Q6W9S8; Q6LJ8; Q9H197; Q9H1A1; Q9HAW1; Q9HAW2; Q9ULH9 | NP_066899                        | Transcription factor TFIIB component B' homolog (Transcription factor IIB 150) (TFIIB150) (Transcription factor-like nuclear regulator)                                                                                                                                                                                                                                                                          | GO:0003677; GO:0005634; GO:0006355                                                                                                                                                                                                                                                             | DNA binding; nucleus; regulation of transcription, DNA-dependent                                                                                                                                                                                                                                                                                                                                                                                                                                                                                                                                                                                                                                                                                                                                                                                                                                        | Nucleus                                             |                                       | Known in Uniprot to be phosphorylated |                                    |          |
| 1340 SRP72   | SRP72_HUMAN  | SRP72; Q7Z3C0; Q71V07  | Q7Z3C0; Q71V07                                                                                               | NP_008878                        | Signal recognition particle 72 kDa protein (SRP72); Putative uncharacterized protein DKFZp686A04192 (Fragment)                                                                                                                                                                                                                                                                                                   | GO:0008132; GO:0006614; GO:0005786; GO:0048500                                                                                                                                                                                                                                                 | 7S RNA binding; SRP-dependent cotranslational protein targeting to membrane; signal recognition particle, endoplasmic reticulum targeting; signal recognition particle                                                                                                                                                                                                                                                                                                                                                                                                                                                                                                                                                                                                                                                                                                                                  | Cytoplasm;                                          |                                       | Known in Uniprot to be phosphorylated |                                    |          |
| 1341 PP2CA   | PP2CA_HUMAN  | PP2CA; PPM1A; B5B11    | P35813; Q75351; NP_808820                                                                                    | NP_066283; NP_808820             | Protein phosphatase 1A (EC 3.1.3.16) (Protein phosphatase 2c isoform alpha) (PP2C-alpha) (IA) B5B11                                                                                                                                                                                                                                                                                                              | GO:000287; GO:0003145; GO:0043123; GO:0030177; GO:0004930; GO:0006470; GO:0004722; GO:0003087; GO:0004871                                                                                                                                                                                      | magnesium ion binding; manganese ion binding; positive regulation of I-kappaB kinase/NF-kappaB cascade; positive regulation of Wnt receptor signaling pathway; positive regulation of transcription, DNA-dependent; protein amino acid dephosphorylation; protein serine/threonine phosphatase activity; protein serine/threonine phosphatase complex; signal transducer activity                                                                                                                                                                                                                                                                                                                                                                                                                                                                                                                       |                                                     | Known in Uniprot to be phosphorylated |                                       | Phosphatase                        |          |
| 1342 HNRDL   | HNRDL_HUMAN  | O14979; HNRDL          | O14979; Q659P2; Q7KZ74; Q7KZ75; Q961M0; Q96543                                                               | NP_005454; NP_112740             | Heterogeneous nuclear ribonucleoprotein D-like (hNRPD-like protein) (hNRNP-DL) (JKT41-binding protein) (AU-rich element RNA-binding factor) (Protein laUIF1)                                                                                                                                                                                                                                                     | GO:0006396; GO:0003937; GO:0003990; GO:0030530; GO:0001166; GO:0008143; GO:0005515; GO:0003697                                                                                                                                                                                                 | RNA processing; cytoplasm; double-stranded DNA binding; heterogeneous nuclear ribonucleoprotein complex; nucleotide binding; poly(A) binding; protein binding; regulation of transcription, DNA-dependent; single-stranded DNA binding                                                                                                                                                                                                                                                                                                                                                                                                                                                                                                                                                                                                                                                                  | NucleusCytoplasm                                    | Known in Uniprot to be phosphorylated |                                       | Known in HPRD to be phosphorylated |          |
| 1343 HNRPK   | HNRPK_HUMAN  | HNRPK; Q6IBN1          | Q6IBN1; P61978; NP_112552; Q15671; Q59F98; Q576W4; Q60577; Q92277; Q93632                                    | NP_002131; NP_112552; NP_112553  | Heterogeneous nuclear ribonucleoprotein K (HNRPK) (Transformation up-regulated nuclear protein) (TUNP); HNRPK protein (Heterogeneous nuclear ribonucleoprotein K) (Heterogeneous nuclear ribonucleoprotein K isoform a) (cDNA FLJ77137, highly similar to Homo sapiens heterogeneous nuclear ribonucleoprotein K (HNRPK), transcript variant 1, mRNA) (Heterogeneous nuclear ribonucleoprotein K, isoform CRA_c) | GO:0006396; GO:0003723; GO:0005737; GO:0030530; GO:0044419; GO:0003998; GO:0005954; GO:0005515; GO:0007165; GO:0005681; GO:0003723; GO:0005634; GO:0003029                                                                                                                                     | DNA binding; RNA binding; cytoplasm; heterogeneous nuclear ribonucleoprotein complex; interspecies interaction between organisms; nuclear mRNA splicing, via spliceosome; nucleoplasm; protein binding; signal transduction; spliceosome; RNA binding; nucleus; ribonucleoprotein complex                                                                                                                                                                                                                                                                                                                                                                                                                                                                                                                                                                                                               | CytoplasmNucleusnucleoplasm;                        | Known in Uniprot to be phosphorylated |                                       | Known in HPRD to be phosphorylated |          |
| 1344 RASK    | RASK_HUMAN   | RASK; Q96F50; ABK825   | P01116; NP_01118; Q96D10; ABK825                                                                             | NP_004976; NP_203524             | GTPase KRas (K-Ras 2) (K-Ras) (c-K-ras) (c-Ki-ras) (Cleaved into: GTPase KRas, N-terminally processed)                                                                                                                                                                                                                                                                                                           | GO:0005222; GO:0005886; GO:0005515; GO:0003723; GO:0022625; GO:0005515; GO:0006414                                                                                                                                                                                                             | GTP binding; intracellular; plasma membrane; protein binding; sensory perception of sound                                                                                                                                                                                                                                                                                                                                                                                                                                                                                                                                                                                                                                                                                                                                                                                                               | Cellmembrane;lipidancher;cytoplasm;                 |                                       |                                       |                                    |          |
| 1345 RL34    | RL34_HUMAN   | RL34                   | P49207; Q6F666; Q9HJ22                                                                                       | XP_301350; NP_000986             | 60S ribosomal protein L34                                                                                                                                                                                                                                                                                                                                                                                        | GO:0003723; GO:0022625; GO:0005515; GO:0006414                                                                                                                                                                                                                                                 | RNA binding; cytosolic large ribosomal subunit; protein binding; structural constituent of ribosome; translational elongation                                                                                                                                                                                                                                                                                                                                                                                                                                                                                                                                                                                                                                                                                                                                                                           |                                                     | Known in Uniprot to be phosphorylated |                                       |                                    |          |
| 1346 CDC42   | CDC42_HUMAN  | CDC42                  | P60953; P11181; P25763; Q718R5                                                                               | NP_001782; NP_001034             | Cell division control protein 42 homolog (G25K GTP-binding protein)                                                                                                                                                                                                                                                                                                                                              | GO:0005222; GO:0003034; GO:0003036; GO:0005829; GO:0007163; GO:0030175; GO:0030225; GO:0031333; GO:0005886; GO:0031274; GO:0005515; GO:0007264                                                                                                                                                 | GTP binding; GTPase activity; actin cytoskeleton organization; cytosol; establishment or maintenance of cell polarity; filopodium; macrophage differentiation; negative regulation of protein complex assembly; plasma membrane; positive regulation of pseudopodium assembly; protein binding; small GTPase mediated signal transduction                                                                                                                                                                                                                                                                                                                                                                                                                                                                                                                                                               | Cellmembrane;lipidancher;cytoplasm;                 |                                       |                                       |                                    |          |
| 1347 RL6     | RL6_HUMAN    | RL6                    | Q02878; Q28523; Q8WV97                                                                                       | XP_294006; NP_000911; NP_001019  | 60S ribosomal protein L6 (TAX-responsive enhancer element-binding protein 107) (TAXREB107) (Neoplasm-related protein C140) 833                                                                                                                                                                                                                                                                                   | GO:0003677; GO:0003723; GO:0022625; GO:0006355; GO:0003735; GO:0005524; GO:0000086; GO:0003101; GO:0004693; GO:0003037; GO:0005829; GO:0042802; GO:0007067; GO:0005654; GO:0008284; GO:0006468; GO:0006275; GO:0007089; GO:0004674                                                             | DNA binding; RNA binding; cytosolic large ribosomal subunit; protein binding; transcription, DNA-dependent; structural constituent of ribosome; translational elongation                                                                                                                                                                                                                                                                                                                                                                                                                                                                                                                                                                                                                                                                                                                                |                                                     | Known in Uniprot to be phosphorylated |                                       |                                    |          |
| 1348 CDK2    | CDK2_HUMAN   | CDK2; O75100           | P24941; NP_001789                                                                                            | NP_439892; NP_001789             | Cell division cycle protein 2 (EC 2.7.11.22) (p33 protein kinase); D-HSCDK2                                                                                                                                                                                                                                                                                                                                      | GO:0005222; GO:0003735; GO:0005524; GO:0000086; GO:0003101; GO:0004693; GO:0003037; GO:0005829; GO:0042802; GO:0007067; GO:0005654; GO:0008284; GO:0006468; GO:0006275; GO:0007089; GO:0004674                                                                                                 | ATP binding; G2/M transition of mitotic cell cycle; cell division; cyclin-dependent protein kinase activity; cyclin-dependent protein kinase holoenzyme complex; cytosol; identical protein binding; mitosis; nucleolus; positive regulation of cell proliferation; protein amino acid phosphorylation; regulation of DNA replication; reversing start control point of mitotic cell cycle; protein serine/threonine kinase activity                                                                                                                                                                                                                                                                                                                                                                                                                                                                    |                                                     | Known in Uniprot to be phosphorylated |                                       | Known in HPRD to Kinase            |          |
| 1349 PSIP1   | PSIP1_HUMAN  | PSIP1                  | O75475; O00256; Q95368; Q67991; Q86Y89; Q9H213; Q918K6                                                       | NP_066967; NP_001121             | PC4 and SFRS1-interacting protein (Lens epithelium-derived growth factor) (Transcriptional coactivator p75/p52) (Dense fine speckles 70 kDa protein) (DFS 70) (CLL-associated antigen KW-7)                                                                                                                                                                                                                      | GO:0003677; GO:0005829; GO:0019059; GO:0044419; GO:0005634; GO:0019047; GO:0006355                                                                                                                                                                                                             | DNA binding; cytosol; initiation of viral infection; interspecies interaction between organisms; nucleus; provirus integration; regulation of transcription, DNA-dependent                                                                                                                                                                                                                                                                                                                                                                                                                                                                                                                                                                                                                                                                                                                              | Nucleus                                             | Known in Uniprot to be phosphorylated |                                       | Known in HPRD to be phosphorylated |          |
| 1350 ASSY    | ASSY_HUMAN   | ASSY                   | P00966; Q6LJ20; Q96GT4                                                                                       | XP_294215; NP_000941             | Argininosuccinate synthase (EC 6.3.4.5) (Citrulline-aspartate ligase)                                                                                                                                                                                                                                                                                                                                            | GO:0005524; GO:0006526; GO:0004005; GO:0005737; GO:0005515; GO:0006454; GO:0000050                                                                                                                                                                                                             | ATP binding; arginine biosynthetic process; argininosuccinate synthase activity; cytoplasm; protein binding; urea cycle                                                                                                                                                                                                                                                                                                                                                                                                                                                                                                                                                                                                                                                                                                                                                                                 |                                                     | Known in Uniprot to be phosphorylated |                                       |                                    |          |
| 1351 FKBP1A  | FKBP1A_HUMAN | FKBP1A; Q4VCV4; Q0VDC6 | P62942; NP_046346; Q91C43; Q95FD9; Q6LEU3; Q9H1D3; Q9H566; Q0VDC6                                            | NP_000792; NP_046346; NP_0010115 | Peptidyl-prolyl cis-trans isomerase FKBP1A (PPIase) (FKBP1A) (EC 5.2.1.8) (FK506-binding protein 1A) (FKBP1A) (Rotamase) (Immunophilin FKBP12) 10 (12 kDa FKBP) (FKBP-12); FKBP1A protein                                                                                                                                                                                                                        | GO:0006454; GO:0005528; GO:0004632; GO:0007183; GO:0042110; GO:0048185; GO:0034205; GO:0005829; GO:0041206; GO:0060347; GO:0032513; GO:0003735; GO:0043123; GO:0032092; GO:0031298; GO:0024117; GO:0042026; GO:0032925; GO:0060314; GO:0004871; GO:0014802; GO:0034713; GO:0003755; GO:0006457 | 'de novo' protein folding; FK506 binding; SMAD binding; SMAD protein complex assembly; T cell activation; activin binding; beta-amyloid formation; cytosol; fibril organization; heart trabecula formation; negative regulation of protein phosphatase type 2B activity; peptidyl-prolyl cis-trans isomerase activity; positive regulation of I-kappaB kinase/NF-kappaB cascade; positive regulation of protein binding; positive regulation of protein ubiquitination; protein maturation via protein folding; protein refolding; regulation of activin receptor signaling pathway; regulation of immune response; regulation of ryanodine-sensitive calcium-release channel activity; signal transducer activity; terminal cisterna; type I transforming growth factor beta receptor binding; ventricular cardiac muscle morphogenesis; peptidyl-prolyl cis-trans isomerase activity; protein folding | Cytoplasm;                                          | Known in Uniprot to be phosphorylated |                                       |                                    |          |
| 1352 FKBP2   | FKBP2_HUMAN  | FKBP2; Q53X15          | P26885; Q53X15; Q58JH9; Q9H573                                                                               | NP_004461; NP_001128             | FK506-binding protein 2 (EC 5.2.1.8) (Peptidyl-prolyl cis-trans isomerase) (PPIase) (Rotamase) (13 kDa FKBP) (FKBP-13); FK506 binding protein 2, 13kDa (FKBP2 protein) (FK506 binding protein 2, 13kDa, isoform CRA_a)                                                                                                                                                                                           | GO:0005528; GO:0005789; GO:0003755; GO:0005515; GO:0006457; GO:0003755                                                                                                                                                                                                                         | FK506 binding; endoplasmic reticulum membrane; peptidyl-prolyl cis-trans isomerase activity; protein binding; protein folding; peptidyl-prolyl cis-trans isomerase activity                                                                                                                                                                                                                                                                                                                                                                                                                                                                                                                                                                                                                                                                                                                             | Endoplasmicreticulum membrane;Periplasmic membrane; |                                       |                                       |                                    |          |
| 1353 MVP     | MVP_HUMAN    | MVP                    | Q14764; Q986G6; Q98PW6; Q98Q71; Q918D3                                                                       | NP_005106; NP_059447             | Major vault protein (MVP) (Lung resistance-related protein)                                                                                                                                                                                                                                                                                                                                                      | GO:0005737; GO:0005829; GO:0051028; GO:0005643; GO:0049493; GO:0005509; GO:0005515                                                                                                                                                                                                             | cytoplasm; intracellular protein transmembrane transport; mRNA transport; nuclear pore; response to rib; ribonucleoprotein complex                                                                                                                                                                                                                                                                                                                                                                                                                                                                                                                                                                                                                                                                                                                                                                      | CytoplasmNucleusnucleoplasm;                        | Known in Uniprot to be phosphorylated |                                       |                                    |          |
| 1354 HPCL1   | HPCL1_HUMAN  | HPCL1; Q6FGY1; Q75544  | Q6FGY1; Q75544                                                                                               | NP_002140; NP_002293             | Hippocalcin-like protein 1 (Vsinin-like protein 3) (VLLIP-3) (Calcium-binding protein BDR-1) (HP22); BDP-1 protein (Fragment); cDNA FLJ78291, highly similar to Homo sapiens hippocalcin-like 1 (HPCL1), transcript variant 2, mRNA (HPCL1 protein) (Hippocalcin-like 1) (Hippocalcin-like 1, isoform CRA_a) (Putative uncharacterized protein HPCL1)                                                            | GO:0005524; GO:0004708; GO:0008339; GO:0007265; GO:0006928; GO:0007166; GO:0006935; GO:0005829; GO:0006544; GO:0006468; GO:0005515; GO:0007243; GO:0006950                                                                                                                                     | calcium ion binding; protein binding                                                                                                                                                                                                                                                                                                                                                                                                                                                                                                                                                                                                                                                                                                                                                                                                                                                                    |                                                     |                                       |                                       |                                    |          |
| 1355 MK14    | MK14_HUMAN   | MK14                   | Q16539; A62392; AB69A; BOLPH0; Q60776; Q11083; Q14084; Q81DX0                                                | NP_001306; NP_620581; NP_620583  | Mitogen-activated protein kinase 14 (EC A62392) (Mitogen-activated protein kinase p38 alpha) (MAP kinase p38 alpha) (Cytokine suppressive anti-inflammatory drug-binding protein) (CSAID-binding protein) (CSBP) (MAX-interacting protein 2) (MAP kinase MK12) (SAPK2A)                                                                                                                                          | GO:0005524; GO:0004708; GO:0008339; GO:0007265; GO:0006928; GO:0007166; GO:0006935; GO:0005829; GO:0006544; GO:0006468; GO:0005515; GO:0007243; GO:0006950                                                                                                                                     | ATP binding; MAP kinase activity; MP kinase activity; Ras protein signal transduction; cell motion; cell surface receptor linked signal transduction; chemotaxis; cytosol; nucleoplasm; protein amino acid phosphorylation; protein binding; protein kinase cascade; response to stress                                                                                                                                                                                                                                                                                                                                                                                                                                                                                                                                                                                                                 | CytoplasmNucleus                                    | Known in Uniprot to be phosphorylated |                                       | Known in HPRD to Kinase            |          |
| 1356 BCL1B   | BCL1B_HUMAN  | BCL1B                  | Q902K0; Q9H162                                                                                               | NP_075049; NP_612808             | B-cell lymphoma/leukemia 11B (B-cell CLL/lymphoma 11B) (Radiation-induced tumor suppressor gene 1 protein) (RIT1) (COUP-TF-interacting protein 2)                                                                                                                                                                                                                                                                | GO:0003676; GO:0005634; GO:0006355; GO:0008270                                                                                                                                                                                                                                                 | nucleic acid binding; nucleus; regulation of transcription, DNA-dependent; zinc ion binding                                                                                                                                                                                                                                                                                                                                                                                                                                                                                                                                                                                                                                                                                                                                                                                                             | Nucleus                                             |                                       |                                       |                                    |          |







| Protein Name | Uniprot Name | Other Names          | Uniprot                                                                                                               | Refseq IDs                      | Protein Description                                                                                                                                                                                                                                                                                                                         | GO ID                                                                                                                                                                                                      | GO terms                                                                                                                                                                                                                                                                                                                                                                                                                                                                                                                                                                                                      | Subcellular location                       | Comments | Comments - Database Search            | Comments - Database Search            | Function |
|--------------|--------------|----------------------|-----------------------------------------------------------------------------------------------------------------------|---------------------------------|---------------------------------------------------------------------------------------------------------------------------------------------------------------------------------------------------------------------------------------------------------------------------------------------------------------------------------------------|------------------------------------------------------------------------------------------------------------------------------------------------------------------------------------------------------------|---------------------------------------------------------------------------------------------------------------------------------------------------------------------------------------------------------------------------------------------------------------------------------------------------------------------------------------------------------------------------------------------------------------------------------------------------------------------------------------------------------------------------------------------------------------------------------------------------------------|--------------------------------------------|----------|---------------------------------------|---------------------------------------|----------|
| 1391         | ATPA_HUMAN   | ATPA; Q53XG6         | P25705; Q53XG6; Q81XV2; Q96FR4; Q96HW2; Q96JRS; Q96TV8                                                                | NP_004037; NP_001001            | ATP synthase subunit alpha, mitochondrial                                                                                                                                                                                                                                                                                                   | GO:000524; GO:0015986; GO:0042288; GO:0009700; GO:0043499; GO:0046933; GO:0006629; GO:0005759; GO:0005753; GO:0001937; GO:0005886; GO:0045261                                                              | ATP binding; ATP synthase coupled proton transport; MHC class I protein binding; embryonic development; eukaryotic cell surface binding; hydrogen ion transporting ATP synthase activity, rotational mechanism; lipid metabolic process; mitochondrial matrix; mitochondrial proton-transporting ATP synthase complex; negative regulation of endothelial cell proliferation; plasma membrane; proton-transporting ATP synthase complex, catalytic core F(1); proton-transporting ATPase activity, rotational mechanism                                                                                       | Mitochondrioninnermembrane                 |          | Known in Uniprot to be phosphorylated |                                       |          |
| 1392         | ATPG_HUMAN   | ATPG; Q8TA50; ABKA31 | P36542; Q5VYP3; Q96AS8; ABKA31; Q8TA50                                                                                | NP_005165; NP_001001            | ATP synthase subunit gamma, mitochondrial (F-ATPase gamma subunit); ATP synthase gamma chain (Fragment)                                                                                                                                                                                                                                     | GO:0015986; GO:0046933; GO:0005759; GO:0009275; GO:0046961                                                                                                                                                 | ATP synthase coupled proton transport; hydrogen ion transporting ATP synthase activity, rotational mechanism; mitochondrial matrix; mitochondrial proton-transporting ATP synthase complex, catalytic core F(1); proton-transporting ATPase activity, rotational mechanism; proton-transporting ATP synthase complex, catalytic core F(1) CTP binding; GTPase activity; cell communication; cis-Golgi network; endomembrane system; endoplasmic reticulum; membrane; mitochondrial fragmentation during apoptosis; mitochondrial membrane organization; multicellular organismal development; protein binding | MitochondrionMitochondrioninnermembrane    |          |                                       |                                       |          |
| 1393         | DNM1L_HUMAN  | DNM1L                | 000429; ABK4X9; D14541; Q60709; Q7LB83; Q81BT7; Q98W11; Q9Y532                                                        | NP_005681; NP_036192; NP_036193 | Dynamamin-1-like protein (EC 3.6.5.5) (Dynamamin-like protein (Dnm1p/Vps1p-like protein) (DVLp) (Dynamamin family member proline-rich carboxy-terminal domain less) (Dymple) (Dynamamin-related protein 1) (Dynamamin-like protein 4) (Dynamamin-like protein IV) (HdyNIV))                                                                 | GO:000525; GO:0003924; GO:0007154; GO:0005801; GO:0012505; GO:0005753; GO:0016020; GO:0043653; GO:0007006; GO:0007275; GO:0005515                                                                          | ATP catabolic process; hydrogen ion transporting ATP synthase activity, rotational mechanism; mitochondrial ATP synthase coupled proton transport; mitochondrial matrix; mitochondrial proton-transporting ATP synthase complex, catalytic core F(1); proton-transporting ATPase activity, rotational mechanism; response to copper ion acute-phase response; blood coagulation; extracellular space; nucleus; peptidase activity; platelet alpha granule lumen; protease binding; proteinaceous extracellular matrix; serine-type endopeptidase inhibitor activity                                           | CytoplasmcytosolofIntracytoplasmicmembrane |          | Known in Uniprot to be phosphorylated |                                       |          |
| 1394         | ATPD_HUMAN   | ATPD; Q6FG90         | P30049; Q6FG90                                                                                                        | NP_001678; NP_001001            | ATP synthase subunit delta, mitochondrial (F-ATPase delta subunit)                                                                                                                                                                                                                                                                          | GO:0006200; GO:0005737; GO:0042776; GO:0005759; GO:0009275; GO:0046688                                                                                                                                     | ATP catabolic process; hydrogen ion transporting ATP synthase activity, rotational mechanism; mitochondrial ATP synthase coupled proton transport; mitochondrial matrix; mitochondrial proton-transporting ATP synthase complex, catalytic core F(1); proton-transporting ATPase activity, rotational mechanism; response to copper ion acute-phase response; blood coagulation; extracellular space; nucleus; peptidase activity; platelet alpha granule lumen; protease binding; proteinaceous extracellular matrix; serine-type endopeptidase inhibitor activity                                           | MitochondrionMitochondrioninnermembrane    |          |                                       |                                       |          |
| 1395         | A1AT_HUMAN   | A1AT; Q53XB8         | P01009; Q53XB8; A6PX14; B2RQ8; Q9PVS5; Q13672; Q5J0M1; Q7M4R2; Q86U18; Q86U19; Q96BF9; Q96ES1; Q9P1P5; Q9UC66; Q9UCH3 | NP_000286; NP_001002            | Alpha-1-antitrypsin (Alpha-1 protease inhibitor) (Alpha-1-antiprotease) (Cleaved into: Short peptide from AAT (SPAAT))                                                                                                                                                                                                                      | GO:000653; GO:0007956; GO:0005615; GO:0005730; GO:0005733; GO:0010993; GO:0002020; GO:0005578; GO:0004867                                                                                                  | acute-phase response; blood coagulation; extracellular space; nucleus; peptidase activity; platelet alpha granule lumen; protease binding; proteinaceous extracellular matrix; serine-type endopeptidase inhibitor activity                                                                                                                                                                                                                                                                                                                                                                                   | SecretedSecretedextracellularspace         |          |                                       |                                       |          |
| 1396         | MYL4_HUMAN   | MYL4                 | P12829; P11783                                                                                                        | NP_002467; NP_001002            | Myosin light chain 4 (Myosin light chain 1, embryonic muscle/atrial isoform) (Myosin light chain alkali, GT-1 isoform)                                                                                                                                                                                                                      | GO:0031672; GO:0051015; GO:0003785; GO:0005509; GO:0006048; GO:0003774; GO:0005859; GO:0007517; GO:0013038; GO:0032781; GO:0002026; GO:0005634; GO:0006355; GO:0003700                                     | A band; actin filament binding; actin monomer binding; calcium ion binding; cardiac muscle contraction; motor organ development; myosin II heavy chain binding; positive regulation of ATPase activity; regulation of the force of heart contraction; structural constituent of muscle                                                                                                                                                                                                                                                                                                                        |                                            |          | known in HPRD to be phosphorylated    |                                       |          |
| 1397         | DBX2_HUMAN   | Q6ZNG2; DBX2         | Q6ZNG2                                                                                                                | NP_0010250                      | Homeobox protein DBX2 (Developing brain homeobox protein 2)                                                                                                                                                                                                                                                                                 | GO:0010043                                                                                                                                                                                                 |                                                                                                                                                                                                                                                                                                                                                                                                                                                                                                                                                                                                               |                                            | Nucleus  |                                       |                                       |          |
| 1398         | STABP_HUMAN  | STABP                | Q95630; Q98J67                                                                                                        | NP_006454; NP_000877            | STAM-binding protein (EC 3.1.2.15) (Associated molecule with the SH3 domain of STAM)                                                                                                                                                                                                                                                        | GO:0007259; GO:0005737; GO:0005681; GO:0008237; GO:0019941; GO:0005634; GO:0008284; GO:0005515; GO:0004221; GO:0008270                                                                                     | JAK-STAT cascade; cytoplasm; membrane; metalloproteinase activity; modification-dependent protein catabolic process; nucleus; positive regulation of cell proliferation; protein binding; ubiquitin thiolesterase activity; zinc ion binding                                                                                                                                                                                                                                                                                                                                                                  | NucleusMembranePeriplasm                   |          | Known in Uniprot to be phosphorylated | Known in HPRD to be phosphorylated    |          |
| 1399         | FRG1_HUMAN   | FRG1; TB8Q4          | Q14331; Q98667; P78533                                                                                                | NP_064424; NP_004468            | Protein FRG1 (FSHD region gene 1 protein); Putative tubulin beta-4q chain                                                                                                                                                                                                                                                                   | GO:0008380; GO:0006037; GO:0016607; GO:0006364; GO:0005681; GO:0003924; GO:0005874; GO:0007018; GO:0043234; GO:0051258; GO:0007417                                                                         | RNA splicing; mRNA processing; nuclear speck; RNA processing; spliceosome; GTP binding; GTPase activity; microtubule; microtubule-based movement; protein complex; protein polymerization; structural molecule activity                                                                                                                                                                                                                                                                                                                                                                                       | NucleusCajalbodyNucleolus                  |          |                                       |                                       |          |
| 1400         | TAGL3_HUMAN  | TAGL3                | Q9U1J5; Q96A74                                                                                                        | NP_037391; NP_001008            | Transgelin-3 (Neuronal protein NP25) (Neuronal protein 22) (NP22)                                                                                                                                                                                                                                                                           | GO:0005198; GO:0007517                                                                                                                                                                                     | central nervous system development; muscle organ development                                                                                                                                                                                                                                                                                                                                                                                                                                                                                                                                                  |                                            |          |                                       | Known in Uniprot to be phosphorylated |          |
| 1401         | LGMN_HUMAN   | LGMN; Q96C77; Q53XC6 | Q95E38; Q53XC6; Q00123; Q98Y17; Q96C77                                                                                | NP_005597; NP_001008            | Legumain (EC 3.4.22.34) (Asparaginyl endopeptidase) (Protease, cysteine 1); Full-length cDNA clone CSD01011YK22 of Placenta of Homo sapiens (Human) (Legumain, isoform CRA_a) (cDNA FLJ78453), highly similar to Homo sapiens legumain (LGMN), transcript variant 2, mRNA); Putative uncharacterized protein (Fragment)                     | GO:0004197; GO:0005764; GO:0004674; GO:0006008; GO:0004197; GO:0005770; GO:0001509; GO:0007049; GO:0051301; GO:0005737; GO:0005977; GO:0005506; GO:0030145; GO:0006470; GO:0005515; GO:0004722; GO:0004721 | cysteine-type endopeptidase activity; lysosome; protein serine/threonine kinase activity; proteolysis; apical part of cell; cysteine-type endopeptidase activity; late endosome; legumain activity; negative regulation of multicellular organism growth cell cycle; cell division; cytoplasm; glycolysis; glycolysis; iron ion binding; manganese ion binding; protein amino acid dephosphorylation; protein binding; protein serine/threonine phosphatase activity; phosphoprotein phosphatase activity                                                                                                     | Lysosome;                                  |          |                                       |                                       |          |
| 1402         | PPIA_HUMAN   | PPIA; Q07161         | Q07161; P62136; B2R508; P08129; P20653; P22802                                                                        | NP_0010087; NP_001008           | Serine/threonine-protein phosphatase PP1-alpha catalytic subunit (PP-1A) (EC 3.1.3.16); Serine/threonine-protein phosphatase (EC 3.1.3.16)                                                                                                                                                                                                  | GO:0005737; GO:0005681; GO:0004015; GO:0007049; GO:0051301; GO:0005737; GO:0005977; GO:0005506; GO:0030145; GO:0006470; GO:0005515; GO:0004722; GO:0004721                                                 | cell cycle; cell division; cytoplasm; glycolysis; glycolysis; iron ion binding; manganese ion binding; protein amino acid dephosphorylation; protein binding; protein serine/threonine phosphatase activity; phosphoprotein phosphatase activity                                                                                                                                                                                                                                                                                                                                                              | Cytoplasm;                                 |          | Known in Uniprot to be phosphorylated | Phosphatase                           |          |
| 1403         | RAP1B_HUMAN  | RAP1B; Q5TZR4        | P61224; Q5TZR4; B2R522; P09526; Q50233; Q6DCA1; Q6LES0                                                                | XP_933978; NP_056411; NP_001010 | Ras-related protein Rap-1b (GTP-binding protein smg p21B)                                                                                                                                                                                                                                                                                   | GO:000525; GO:0005886; GO:0007264                                                                                                                                                                          | GTP binding; cytoplasm; plasma membrane; small GTPase mediated signal transduction                                                                                                                                                                                                                                                                                                                                                                                                                                                                                                                            | CellmembraneCytoplasmmytosol               |          | Known in Uniprot to be phosphorylated | Known in HPRD to be phosphorylated    |          |
| 1404         | RAI12_HUMAN  | Q8TBS2; RAI12        | Q8TBS2; Q8TBS2; Q8TBS2; Q8TBS2; Q8TBS2; Q8TBS2                                                                        | XP_291501; NP_0010117           | Heterogeneous nuclear ribonucleoprotein A1-like protein 2 (hnRNP core protein A1-like protein 2)                                                                                                                                                                                                                                            | GO:0007273; GO:0008380; GO:0005737; GO:0006397; GO:0051028; GO:0000186; GO:0004588; GO:0006091; GO:0005887; GO:0005743; GO:0015320; GO:0015323; GO:0006810; GO:0005743                                     | RNA binding; RNA splicing; cytoplasm; mRNA processing; mRNA transport; nucleotide binding; spliceosome                                                                                                                                                                                                                                                                                                                                                                                                                                                                                                        | NucleusCytoplasm                           |          |                                       |                                       |          |
| 1405         | MPCP_HUMAN   | MPCP; Q6MZF9; Q7Z7N7 | Q00325; Q96A03; Q6MZF9; Q7Z7N7                                                                                        | NP_002626; NP_005879; NP_098776 | Phosphate carrier protein, mitochondrial (Phosphate transport protein) (PTP) (Solute carrier family 25 member 3); Putative uncharacterized protein (Fragment); Solute carrier family 25 (Mitochondrial carrier; phosphate carrier), member 3 (Solute carrier family 25 (Mitochondrial carrier; phosphate carrier), member 3, isoform CRA_a) | GO:0005737; GO:0005739; GO:0009636; GO:0008272; GO:0004792; GO:0005534; GO:0005874; GO:0008568; GO:0008104; GO:0010038                                                                                     | binding; generation of precursor metabolites and energy; integral to plasma membrane; mitochondrial inner membrane; phosphate carrier activity; symporter activity; transport; mitochondrial inner membrane                                                                                                                                                                                                                                                                                                                                                                                                   | Mitochondrioninnermembrane                 |          |                                       |                                       |          |
| 1406         | THMT_HUMAN   | THMT; Q6FH99         | P25325; Q6FH99; O75750; A8M234                                                                                        | NP_066949; NP_0010113           | 3-mercaptopropionate sulfuryltransferase (MST) (EC 2.8.1.2); MPST protein (Mercaptopropionate sulfuryltransferase, isoform CRA_a) (Putative uncharacterized protein MPST) (Fragment)                                                                                                                                                        | GO:0016784; GO:0009440; GO:0005739; GO:0009636; GO:0008272; GO:0004792; GO:0005534; GO:0005874; GO:0008568; GO:0008104; GO:0010038                                                                         | 3-mercaptopropionate sulfuryltransferase activity; cyanate catabolic process; mitochondrial; response to toxin; sulfate transport; thioautotrophy; sulfurtransferase activity; sulfate transport                                                                                                                                                                                                                                                                                                                                                                                                              | Cytoplasm;                                 |          |                                       |                                       |          |
| 1407         | KATL1_HUMAN  | KATL1; ABK5X4        | Q98W62; ABK5X4                                                                                                        | NP_115492; NP_001014            | Katanin p60 ATPase-containing subunit A-like 1 (Katanin p60 subunit A-like 1) (EC 3.6.4.3) (p60 katanin-like 1)                                                                                                                                                                                                                             | GO:0001989; GO:0016020; GO:0008104; GO:0010038                                                                                                                                                             | enzyme binding; membrane; protein localization; response to metal ion                                                                                                                                                                                                                                                                                                                                                                                                                                                                                                                                         |                                            |          |                                       |                                       |          |
| 1408         | CUTA_HUMAN   | CUTA                 | A28E44; Q3B784; Q5XMP9; Q53J05; Q9NYQ9                                                                                | NP_0010148                      | Protein CutA (Brain acetylcholinesterase putative membrane anchor) (Acetylcholinesterase-associated protein)                                                                                                                                                                                                                                | GO:0001989; GO:0016020; GO:0008104; GO:0010038                                                                                                                                                             | enzyme binding; membrane; protein localization; response to metal ion                                                                                                                                                                                                                                                                                                                                                                                                                                                                                                                                         |                                            |          |                                       |                                       |          |





| Protein Name | Uniprot Name | Other Names  | Uniprot Refseq IDs     | Protein Description                                                                                                                                                                                                                                                                    | GO ID                                                                                                      | GO terms                                                                                                                                                                                                                              | Subcellular location                                                                     | Comments | Comments - Database Search            | Comments - Database Search         | Function |
|--------------|--------------|--------------|------------------------|----------------------------------------------------------------------------------------------------------------------------------------------------------------------------------------------------------------------------------------------------------------------------------------|------------------------------------------------------------------------------------------------------------|---------------------------------------------------------------------------------------------------------------------------------------------------------------------------------------------------------------------------------------|------------------------------------------------------------------------------------------|----------|---------------------------------------|------------------------------------|----------|
| 1464         | CEB10        | CEB10; Z804A | Q7Z570; A7E253; Q6Z926 | XP_293011; Zinc finger protein 804A<br>NP_191226                                                                                                                                                                                                                                       | GO:0005522; GO:0008270                                                                                     | intracellular; zinc ion binding                                                                                                                                                                                                       |                                                                                          |          |                                       |                                    |          |
| 1465         | FLIP1        | FLIP1_HUMAN  | FLIP1                  | XP_029179; Filamin-A-interacting protein 1 (FLIP)<br>NP_056502                                                                                                                                                                                                                         |                                                                                                            |                                                                                                                                                                                                                                       |                                                                                          |          | Known in Uniprot to be phosphorylated |                                    |          |
| 1466         | VP13B        | VP13B_HUMAN  | VP13B                  | Q7Z768; XP_047659; Vacuolar protein sorting-associated protein 13B<br>Q79926; NP_056056; (Cohen syndrome protein 1)<br>Q799C7; NP_060360;<br>Q7Z7G4; NP_689777;<br>Q7Z7G5; NP_858047<br>Q7Z7G6;<br>Q7Z7G7;<br>Q8H877;<br>Q9NWW1;                                                       | GO:0015031                                                                                                 | protein transport                                                                                                                                                                                                                     |                                                                                          |          | Known in Uniprot to be phosphorylated |                                    |          |
| 1467         | Q7Z76        | Q7Z76_HUMAN  | Q7Z76                  | XP_301583                                                                                                                                                                                                                                                                              | GO:0005524; GO:0005856; GO:0006637; GO:0004091; GO:0005829; GO:0001676; GO:00016290;                       | ATP binding; cytoskeleton; protein binding<br>acyl-CoA metabolic process; carboxylesterase activity; cytosol; long-chain fatty acid metabolic process; palmitoyl-CoA hydrolase activity; very-long-chain fatty acid metabolic process | Cytoplasm                                                                                |          |                                       |                                    |          |
| 1468         | ACOT1        | ACOT1_HUMAN  | ACOT1                  | Q867X2; XP_301494; Acyl-coenzyme A thioesterase 1 (Acyl-CoA<br>A11173; NP_0010322 thioesterase 1) (EC 3.1.1.2) (inducible cytosolic<br>Q315F9 38 acyl-coenzyme A thioester hydrolase) (Long chain<br>acyl-CoA thioester hydrolase) (Long chain acyl-CoA<br>hydrolase) (CTE-1) (CTE-1b) | GO:0042995; GO:0005737; GO:0005634; GO:0006417                                                             | cell projection; cytoplasm; nucleus; regulation of translation                                                                                                                                                                        | NucleusCytoplasmCellproj<br>ectionaxonCellproj<br>ectonendriectCellproj<br>ectonlipodium |          | Known in Uniprot to be phosphorylated | Known in HPRD to be phosphorylated |          |
| 1469         | Q8IZ50       | Q8IZ50_HUMAN | Q8IZ50                 | XP_210664                                                                                                                                                                                                                                                                              | GO:0005488; GO:0005737                                                                                     | binding; cytoplasm                                                                                                                                                                                                                    |                                                                                          |          |                                       |                                    |          |
| 1470         | NGDN         | NGDN_HUMAN   | NGDN                   | Q8NEJ9; XP_033371; Neuroguin (EIF4E-binding protein)<br>NP_056329; NP_001036<br>100                                                                                                                                                                                                    | GO:0005488; GO:0005737                                                                                     | binding; cytoplasm                                                                                                                                                                                                                    |                                                                                          |          |                                       |                                    |          |
| 1471         | F10A5        | F10A5_HUMAN  | F10A5                  | Q8NF4                                                                                                                                                                                                                                                                                  | GO:0005488; GO:0005737                                                                                     | binding; cytoplasm                                                                                                                                                                                                                    |                                                                                          |          |                                       |                                    |          |
| 1472         | Q8TBK7       | Q8TBK7_HUMAN | Q8TBK7                 | XP_302053                                                                                                                                                                                                                                                                              | GO:0005488; GO:0005737                                                                                     | binding; cytoplasm                                                                                                                                                                                                                    |                                                                                          |          |                                       |                                    |          |
| 1473         | Q8WU19       | Q8WU19_HUMAN | Q8WU19                 | XP_084610                                                                                                                                                                                                                                                                              | GO:0005525; GO:0003924; GO:0005874; GO:0007018; GO:0043234; GO:0051258; GO:0005737; GO:0004870;            | GTP binding; GTPase activity; microtubule; microtubule-based movement; protein complex; protein polymerization; structural molecule activity<br>cytoplasm; embryonic skeletal system development                                      | Cytoplasm                                                                                |          | Known in Uniprot to be phosphorylated |                                    |          |
| 1474         | SKT          | SKT_HUMAN    | Q8WV45; Q9NSR2; SKT    | Q8WV45; XP_166112; Sickle tail protein homolog<br>Q5T5P2; NP_062536;<br>A5LHW9; NP_001091<br>970;<br>A6PVQ5; NP_0010919<br>71<br>A6PVQ7;<br>Q4KMG4;<br>Q5T5P3;<br>Q5T7H3;<br>Q6MZZ6;<br>Q6ZUJ4;<br>Q9NSR2;<br>Q9ULK3                                                                   | GO:0005515; GO:0006417; GO:0005840; GO:0008135                                                             | protein binding; regulation of translation; ribosome; translation factor activity; nucleic acid binding                                                                                                                               |                                                                                          |          | Known in Uniprot to be phosphorylated |                                    |          |
| 1475         | GCN1L        | GCN1L_HUMAN  | GCN1L                  | XP_045792; Translational activator GCN1 (GCN1-like protein 1)<br>NP_006827 (hGCN1)                                                                                                                                                                                                     | GO:0005515; GO:0006417; GO:0005840; GO:0008135                                                             | protein binding; regulation of translation; ribosome; translation factor activity; nucleic acid binding                                                                                                                               |                                                                                          |          | Known in Uniprot to be phosphorylated |                                    |          |
| 1476         | ZNSB2        | ZNSB2_HUMAN  | ZNSB2                  | Q96NG8; XP_033004; Zinc finger protein 582<br>Q6PIT6 NP_653291                                                                                                                                                                                                                         | GO:0003677; GO:0005634; GO:0006355; GO:0008270                                                             | DNA binding; nucleus; regulation of transcription, DNA-dependent; zinc ion binding                                                                                                                                                    | Nucleus                                                                                  |          |                                       |                                    |          |
| 1477         | Q96RH9       | Q96RH9_HUMAN | Q96RH9                 | XP_097006; HCG1980276 (MUSP1)<br>XP_0017150<br>69;<br>XP_0017256<br>90;<br>XP_0017269<br>28                                                                                                                                                                                            | GO:0004459; GO:0019642; GO:0005737; GO:0055114; GO:0005737; GO:0001311; GO:0016791                         | L-lactate dehydrogenase activity; anaerobic glycolysis; cytoplasm; oxidation reduction; protein binding                                                                                                                               |                                                                                          |          |                                       |                                    |          |
| 1478         | LDH8B        | LDH8B_HUMAN  | LDH8B                  | Q9BYZ2; XP_062669; L-lactate dehydrogenase A-like 6B (EC 1.1.1.27)<br>Q6DLY4; NP_149972<br>Q96L12                                                                                                                                                                                      | GO:0004459; GO:0019642; GO:0005737; GO:0055114; GO:0005737; GO:0001311; GO:0016791                         | L-lactate dehydrogenase activity; anaerobic glycolysis; cytoplasm; oxidation reduction; protein binding                                                                                                                               |                                                                                          |          |                                       |                                    |          |
| 1479         | MTMRC        | MTMRC_HUMAN  | Q9C011; MTMRC          | Q9C011; NP_061934; Myotubularin-related protein 12<br>Q99YV4; NP_001035 (Phosphatidylinositol 3-phosphate 3-phosphatase<br>Q6PFW3; NP_0010353 adapter subunit) (3-phosphatase adapter protein)<br>Q96QU2;<br>Q9NKK7                                                                    | GO:0005514; GO:0001631; GO:0016791                                                                         | cytoplasm; dephosphorylation; phosphatase activity                                                                                                                                                                                    | Cytoplasm                                                                                |          | Known in Uniprot to be phosphorylated | Phosphatase                        |          |
| 1480         | K1549        | K1549_HUMAN  | Q9H0M3; K1549          | XP_297463; UPR0606 protein KIAA1549<br>Q9H0M3; NP_065961<br>Q9H0M3; NP_065961                                                                                                                                                                                                          | GO:0016021                                                                                                 | integral to membrane                                                                                                                                                                                                                  | MembraneMultipassme<br>mbraneprotein                                                     |          | Known in Uniprot to be phosphorylated |                                    |          |
| 1481         | CK067        | CK067_HUMAN  | CK067                  | XP_166241; UPR0366 protein C11orf67<br>NP_078960                                                                                                                                                                                                                                       | GO:0005525; GO:0003924; GO:0005874; GO:0007018; GO:0043234; GO:0051258; GO:0005737; GO:0005086; GO:0007601 | GTP binding; GTPase activity; microtubule; microtubule-based movement; protein complex; protein polymerization; structural molecule activity<br>cytoplasm; response to stimulus; visual perception                                    | CytoplasmCellproj<br>ectonciliumbasalbody                                                |          |                                       |                                    |          |
| 1483         | C2D2A        | C2D2A_HUMAN  | Q9H8A7; C2D2A          | XP_291660; Coiled-coil and C2 domain-containing protein 2A<br>Q99ZK1; NP_010739<br>91;<br>A6ND97; NP_065836<br>Q35YF3                                                                                                                                                                  | GO:0005737; GO:0050896; GO:0007601                                                                         | cytoplasm; response to stimulus; visual perception                                                                                                                                                                                    | CytoplasmCellproj<br>ectonciliumbasalbody                                                |          |                                       |                                    |          |
| 1484         | Q9HG2        | Q9HG2_HUMAN  | Q9HG2                  | XP_296484; cDNA FL112781 fls, clone NT2RP2001861<br>XP_0017204<br>86                                                                                                                                                                                                                   | GO:0030154; GO:0007275; GO:0007283                                                                         | cell differentiation; multicellular organismal development; spermatogenesis                                                                                                                                                           |                                                                                          |          |                                       |                                    |          |
| 1485         | C0002        | C0002_HUMAN  | C0002                  | Q9NZP6; XP_294519; Protein C15orf2<br>NP_061831                                                                                                                                                                                                                                        | GO:0030154; GO:0007275; GO:0007283                                                                         | cell differentiation; multicellular organismal development; spermatogenesis                                                                                                                                                           |                                                                                          |          |                                       |                                    |          |
| 1486         | CF115        | CF115_HUMAN  | CF115                  | Q9P1F3; XP_302246; UPR0727 protein C6orf115<br>Q52ZC8; NP_067066<br>Q9P1A1                                                                                                                                                                                                             | GO:0005524; GO:0005003; GO:0016021; GO:0006468; GO:0007169                                                 | ATP binding; ephrin receptor activity; integral to membrane; protein amino acid phosphorylation; transmembrane receptor protein tyrosine kinase signaling pathway                                                                     | MembraneSinglepass<br>ty                                                                 |          | Known in Uniprot to be phosphorylated | Kinase                             |          |
| 1487         | DYH2         | DYH2_HUMAN   | Q9P225; DYH2           | XP_305800; Dynein heavy chain 2, axonemal (Axonemal beta<br>dynein heavy chain 2) (Ciliary dynein heavy chain<br>2) (Dynein heavy chain domain-containing protein<br>3)                                                                                                                | GO:0005524; GO:0016887; GO:0005856; GO:0001539; GO:0005929; GO:000874; GO:0003777; GO:0007018              | ATP binding; ATPase activity; axonemal motility; cilium; microtubule; microtubule motor activity; microtubule-based movement                                                                                                          | Nucleus                                                                                  |          | Known in Uniprot to be phosphorylated |                                    |          |
| 1488         | K1370        | K1370_HUMAN  | Q9P2H7; K1370          | Q9P2H7; XP_035527; Uncharacterized protein KIAA1370<br>Q32MH5; NP_062546<br>Q8KA52;<br>Q32MH6;<br>Q4G0R7;<br>Q5X1J6;<br>Q6F0A3;<br>Q9NV24                                                                                                                                              | GO:0005524; GO:0005003; GO:0016021; GO:0006468; GO:0007169                                                 | ATP binding; ephrin receptor activity; integral to membrane; protein amino acid phosphorylation; transmembrane receptor protein tyrosine kinase signaling pathway                                                                     | MembraneSinglepass<br>ty                                                                 |          | Known in Uniprot to be phosphorylated | Kinase                             |          |
| 1489         | EPHA6        | EPHA6_HUMAN  | EPHA6; B3KS12          | Q9HF33; NP_0010739; Ephrin type-A receptor 6 (EC 2.7.10.1) (Tyrosine-<br>kinase receptor Etk-2) (EPH homology<br>XP_114973; kinase 2)<br>NP_775926                                                                                                                                     | GO:0005524; GO:0005003; GO:0016021; GO:0006468; GO:0007169                                                 | ATP binding; ephrin receptor activity; integral to membrane; protein amino acid phosphorylation; transmembrane receptor protein tyrosine kinase signaling pathway                                                                     | MembraneSinglepass<br>ty                                                                 |          | Known in Uniprot to be phosphorylated | Kinase                             |          |
| 1490         | K1210        | K1210_HUMAN  | K1210                  | Q9ULL0; Q53PW                                                                                                                                                                                                                                                                          | GO:0005634                                                                                                 | nucleus                                                                                                                                                                                                                               |                                                                                          |          |                                       |                                    |          |
| 1491         | MRV1         | MRV1_HUMAN   | Q9UNY1; MRV1           | NP_006060; Protein MRV1 (Inositol 1,4,5-triphosphate<br>NP_569056; receptor-associated cGMP kinase substrate) (JAW1<br>NP_0010920 related protein MRV1)<br>49                                                                                                                          | GO:0005789; GO:0016021; GO:0005634; GO:0016529                                                             | endoplasmic reticulum membrane; integral to membrane; nucleus; sarcoplasmic reticulum                                                                                                                                                 | Cytoplasmperinuclea<br>r                                                                 |          | Known in Uniprot to be phosphorylated | Known in HPRD to be phosphorylated |          |
| 1492         | CCD56        | CCD56_HUMAN  | CCD56                  | Q9Y2R0                                                                                                                                                                                                                                                                                 | GO:0016021                                                                                                 | integral to membrane                                                                                                                                                                                                                  | MembraneSinglepass<br>mbraneprotein                                                      |          |                                       |                                    |          |
| 1493         | ZN134        | ZN134_HUMAN  | Q9Y4B2; ZN134          | XP_094822; Zinc finger protein 134<br>P52741; NP_003426                                                                                                                                                                                                                                | GO:0005634; GO:0006355; GO:0003700; GO:0008270                                                             | nucleus; regulation of transcription, DNA-dependent; transcription factor activity; zinc ion binding                                                                                                                                  | Nucleus                                                                                  |          |                                       |                                    |          |
| 1494         | PPAL4        | PPAL4_HUMAN  | A1L431; PPAL4          | A2BFH1; XP_089309; Peptidylprolyl cis-trans isomerase A-like 4 (PPIase<br>A11431; NP_0011165 A-like 4) (EC 5.2.1.8) (Chromosome 1-amplified<br>sequence 2) (COAS-2)<br>40                                                                                                              | GO:0005737; GO:0003755; GO:0006457                                                                         | cytoplasm; peptidyl-prolyl cis-trans isomerase activity; protein folding                                                                                                                                                              | Cytoplasm                                                                                |          |                                       |                                    |          |
| 1495         | A1L454       | A1L454_HUMAN | A1L454                 | XP_290702                                                                                                                                                                                                                                                                              | GO:0012511                                                                                                 | monolayer-surrounded lipid storage body                                                                                                                                                                                               | Lipiddroplet                                                                             |          |                                       |                                    |          |
| 1496         | LSDP5        | LSDP5_HUMAN  | A2RRC1; LSDP5          | Q00625; NP_0010137<br>28                                                                                                                                                                                                                                                               |                                                                                                            |                                                                                                                                                                                                                                       |                                                                                          |          |                                       |                                    |          |
| 1497         | A4FUB8       | A4FUB8_HUMAN | A4FUB8                 | XP_297123                                                                                                                                                                                                                                                                              |                                                                                                            |                                                                                                                                                                                                                                       |                                                                                          |          |                                       |                                    |          |
| 1498         | ARHL1        | ARHL1_HUMAN  | ARHL1                  | Q8NDY3; XP_097771; (Protein ADP-ribosylarginine) hydrolase-like<br>Q5UGZ2; NP_612439; protein 1 (ADP-ribosylhydrolase 2)<br>NP_946631                                                                                                                                                  | GO:0003875; GO:0000287; GO:0051725                                                                         | ADP-ribosylarginine hydrolase activity; magnesium ion binding; protein amino acid de-ADP-ribosylation                                                                                                                                 |                                                                                          |          |                                       |                                    |          |

| Protein Name | Uniprot Name | Other Names  | Uniprot IDs          | Refseq IDs                                             | Protein Description  | GO ID                                                                                                                        | GO terms                                                                                                                          | Subcellular location                                                                                                                              | Comments                                                    | Comments                         | Comments - Database Search            | Comments - Database Search         | Function |
|--------------|--------------|--------------|----------------------|--------------------------------------------------------|----------------------|------------------------------------------------------------------------------------------------------------------------------|-----------------------------------------------------------------------------------------------------------------------------------|---------------------------------------------------------------------------------------------------------------------------------------------------|-------------------------------------------------------------|----------------------------------|---------------------------------------|------------------------------------|----------|
| 1499         | HMG1         | HMG1_HUMAN   | HMG1                 | R99429; A5DBW9; Q14321; Q377C3; Q6IBE1                 | XP_299053; NP_002119 | High mobility group protein E1 (High mobility group protein 1) (HMG-1)                                                       | GO:0008301; GO:0006310; GO:0006268; GO:0006916; GO:0006288; GO:000793; GO:0006325; GO:0017055; GO:0005730; GO:0007165; GO:0008134 | Nucleus                                                                                                                                           |                                                             |                                  | Known in Uniprot to be phosphorylated |                                    |          |
| 1500         | NACAK        | NACAK_HUMAN  | NACAK                |                                                        | XP_304146            | Putative nascent polypeptide-associated complex subunit alpha-like protein (NAC-alpha pseudogene 1) (Alpha-NAC pseudogene 1) | GO:0005515                                                                                                                        |                                                                                                                                                   |                                                             |                                  |                                       |                                    |          |
| 1501         | NACP1        | NACP1_HUMAN  | NACP1                |                                                        | NP_114420            | Putative nascent polypeptide-associated complex subunit alpha-like protein (NAC-alpha pseudogene 1) (Alpha-NAC pseudogene 1) | GO:0005515                                                                                                                        |                                                                                                                                                   |                                                             |                                  |                                       |                                    |          |
| 1502         | Q05AH0       | Q05AH0_HUMAN | Q05AH0               |                                                        | XP_298144            | FSHR protein                                                                                                                 | GO:0007186; GO:0004963; GO:0016021; GO:0005515                                                                                    | G-protein coupled receptor protein signaling pathway; follicle-stimulating hormone receptor activity; integral to membrane; protein binding       |                                                             |                                  |                                       |                                    |          |
| 1503         | APC2         | APC2_HUMAN   | Q05BW4; APC2         | Q95996; Q05BW4; Q9UBZ1; Q9UEH8; Q9UQJ8; Q9UQJ9; Q9Y632 | XP_297980; NP_005874 | Adenomatous polyposis coli protein 2 (Adenomatous polyposis coli protein-like) (APC-like)                                    | GO:000139; GO:0016055; GO:0008013; GO:0016342; GO:0005874; GO:0008017; GO:0006461                                                 | Golgi membrane; Wnt receptor signaling pathway; beta-catenin binding; catenin complex; microtubule; microtubule binding; protein complex assembly | Cytoplasm; cytoskeleton                                     |                                  |                                       |                                    |          |
| 1504         | T183A        | T183A_HUMAN  | T183A                | Q81XK5; Q6NW15; Q9BE06                                 | XP_293932; NP_612400 | Transmembrane protein 183A                                                                                                   | GO:0016021                                                                                                                        | Integral to membrane                                                                                                                              | Membrane; single-pass transmembrane protein                 |                                  |                                       |                                    |          |
| 1505         | TRML1        | TRML1_HUMAN  | TRML1                | Q851W5; Q496B3; Q81WY1; Q81WY2                         | XP_291183; NP_835468 | Trem-like transcript 1 protein (TL1-1) (Triggering receptor expressed on myeloid cells-like protein 1)                       | GO:0045087; GO:0016021; GO:0005886; GO:0004872                                                                                    | Innate immune response; integral to membrane; plasma membrane; receptor activity                                                                  | Cell membrane; single-pass transmembrane protein; cytoplasm |                                  | Known in Uniprot to be phosphorylated | Known in HPRD to be phosphorylated |          |
| 1506         | ANGT         | ANGT_HUMAN   | ANGT; B0ZBE2; B2R5S1 | P01019; Q16358; Q16359; Q06F91; B0ZBE2; B2R5S1         | NP_000020; 670366A   |                                                                                                                              |                                                                                                                                   |                                                                                                                                                   |                                                             |                                  |                                       |                                    |          |
| 1507         | LOC730184    | LOC730184    | LOC730184            |                                                        | XP_0011328           |                                                                                                                              |                                                                                                                                   |                                                                                                                                                   |                                                             | Phosphorylated - from this study |                                       |                                    |          |
